# Supplementary material for: Proteomic-Based Analysis of Hypoxia- and Physioxia-Responsive Proteins and Pathways in Diffuse Large B-Cell Lymphoma
Source: Cells. 2021 Aug 8;10(8):2025. doi: 10.3390/cells10082025 (PMC8392495; doi:10.3390/cells10082025)
Supplement: Supplementary file 1 [file cells-10-02025-s001.zip]

Archive with 5 entries (5 files):
- Cells, supplementarry Figures.pdf
- S1. All proteins identified in the study..xlsx
- S2. DAPs identified in each cell line.xlsx
- S3. DAPs overlapping in distinct cell lines..xlsx
- S4.Pathways enriched in Ri-1 cell line..xlsx
