# Supplementary material for: Proteomic-Based Analysis of Hypoxia- and Physioxia-Responsive Proteins and Pathways in Diffuse Large B-Cell Lymphoma
Source: Cells. 2021 Aug 8;10(8):2025. doi: 10.3390/cells10082025 (PMC8392495; doi:10.3390/cells10082025)
Supplement: Supplementary file 1 [file cells-10-02025-s001.zip › S1. All proteins identified in the study..xlsx]

## Sheet: Arkusz2
Column1	Column2	Column3	Column4	Column5	Column6	Column7	Column8	Column9	Column10	Column11	Column12	Column13	Column14	Column15	Column16	Column17	Column18	Column19	Column20	Column21	Column22	Column23	Column24	Column25	Column26	Column27	Column28	Column29	Column30	Column31	Column32	Column33	Column34	Column35	Column36	Column37	Column38	Column39	Column40	Column41	Column42	Column43	Column44	Column45	Column46
Ri-1 1%. 1	Ri-1 1%. 2	Ri-1 1%. 3	Ri-1 1%. 4	Ri-1 5%. 1	Ri-1 5%. 2	Ri-1 5%. 3	Ri-1 5%. 4	Ri-1 21%. 1	Ri-1 21%. 2	Ri-1 21%. 3	Ri-1 21%. 4	U2904 1%.1	U2904 1%.2	U2904 1%.3	U2904 1%.4	U2904 5%.1	U2904 5%.2	U2904 5%.3	U2904 5%.4	U2904 21%.1	U2904 21%.2	U2904 21%.3	U2904 21%.4	U2932 1%.1	U2932 1%.2	U2932 1%.3	U2932 1%.4	U2932 5%.1	U2932 5%.2	U2932 5%.3	U2932 5%.4	U2932 21%.1	U2932 21%.2	U2932 21%.3	U2932 21%.4	Peptides	Razor + unique peptides	Unique peptides	Mol. weight [kDa]	Q-value	Score	Protein IDs	Majority protein IDs	Protein names	Gene names
764829376	584921728	822073152	89170272	126941392	763515520	1104176512	712810880	103767056	1177876736	1044644800	1285153152	745241216	707430528	636132544	606735616	687163840	1077306624	638314624	665074240	1068700096	946945536	856714048	675344064	341676672	323340224	290048448	325790720	318193728	336498912	407469792	426797088	334526400	342598208	439454400	382077312	6	6	6	31231	0	45659	Q9NX47	Q9NX47	E3 ubiquitin-protein ligase MARCH5	05.mar
24325408	2983231	3516303	28417084	5834453	40815804	45911548	27593832	53195156	33628432	40740656	40009644	29891352	46912136	5657203	23112688	51011072	37600328	2349424	33484800	41968308	36358772	31936048	24901172	0	0	14804577	28400792	32846078	0	22987024	1992757	26119802	2158854	1638351	19674454	2	2	2	10254	15596	59117	O60337;O60337-6;O60337-5	O60337;O60337-6;O60337-5	E3 ubiquitin-protein ligase MARCH6	06.mar
6330025	4285663	0	4211353	10200314	9274107	904175	0	0	0	0	0	0	0	5876901	0	0	0	0	0	0	0	0	0	7931959	0	0	14623445	0	0	13291219	0	0	0	14557009	16463317	1	1	1	7805	65121	17895	Q9H992;F5H6W4;Q9H992-2	Q9H992;F5H6W4;Q9H992-2	E3 ubiquitin-protein ligase MARCH7	07.mar
0	0	0	0	0	0	0	0	0	0	0	0	0	0	0	0	0	0	0	0	0	0	0	0	0	0	0	0	0	0	0	0	0	0	8174489	0	3	1	1	76968	1	-2	I3L2M1	I3L2M1		01.wrz
106960464	845589696	939615424	1105561600	1255878144	1331179904	108442216	111078072	1343678336	955518784	946776064	1064770368	833457536	924623360	760634432	1011495232	1001658624	890149632	1118754688	841819648	773814016	633026880	706204480	888738752	1238853	1267195520	1831882240	1748022784	1735100160	1812843008	1955065600	1535431040	1685167616	1782328192	1495920640	1517185024	13	13	11	4197	0	70858	Q8WYJ6;J3KNL2;Q8WYJ6-2	Q8WYJ6;J3KNL2	Septin-1	01.wrz
1221350144	1134539904	1465437312	1436703104	1154120960	1126463744	1136432000	1266966272	1130678528	1108629504	1207534464	1131219840	9796327424	1372739840	132690984	1305627904	1214355968	1283427456	1120817920	1143705728	1126834432	1202455296	1107013888	7929372672	1444046080	1540702080	1435297152	1581420032	1261525760	1333705472	154881632	1539287040	1136005120	1160222208	1333402240	1069441600	22	22	3	41487	0	32331	Q15019;Q15019-2;Q15019-3;H7C2Y0;C9JB25;C9J938;C9IZU3;H7C310;C9JZI2;C9JQJ4;C9JT15;C9JSE7;C9JFT1;F8WB65;H7C1T1	Q15019;Q15019-2;Q15019-3;H7C2Y0	Septin-2	02.wrz
17230868	21566436	4949291	12979691	42033840	52711360	39417228	67305024	65058428	40762408	84866928	50001396	42778768	38573836	30919004	40612048	33087588	13074463	45386428	70113952	15216372	28641816	45300096	1392002	6663292	68610432	10298352	54385708	33264860	36627988	24091384	31409852	54585384	49773736	65899980	31382660	3	1	1	55098	1	-2	O43236;J3QRT6;J3KSZ7;O43236-2;O43236-3;O43236-4;O43236-5	O43236;J3QRT6;J3KSZ7;O43236-2;O43236-3;O43236-4;O43236-5	Septin-4	04.wrz
72147648	22561768	6061217	72427848	76267128	68865888	52651320	87625528	9413683	83239656	61544696	95947504	77943216	68191304	92776704	103585600	91134064	75701648	7725023	75412208	60706376	61587184	9054552	15437396	44916724	33097548	60827744	46216384	31811932	33716840	27486876	35170564	45718936	33760228	46527828	34943316	4	3	3	42777	1	-2	Q99719;G3XAH0;Q99719-2;E7EQM7;C9JM82;E7EPG2;B4DJ62;E7EX32;F8W9E5;H7C299;J3QRU3;A0A087WWZ5;J3QLR2;J3QLA8;O43236-6	Q99719;G3XAH0;Q99719-2;E7EQM7;C9JM82;E7EPG2;B4DJ62;E7EX32;F8W9E5	Septin-5	05.wrz
1944387840	184855376	2176124416	2041714432	2349674240	1949770496	1794900224	2214296832	1889534720	2645965056	2039881216	2791076096	1725485312	1914520064	1867038976	1759567616	1828378752	1894101632	193512016	1930206976	1928971776	1585963776	1578157696	1512148608	1563828736	1683881600	1647439488	1708299008	1553299072	1541342080	1743111296	1754884480	1504085376	1502860672	1536095616	1467072384	18	18	12	49716	0	32331	Q14141;B1AMS2;Q14141-2;Q14141-4;Q14141-3	Q14141;B1AMS2;Q14141-2;Q14141-4;Q14141-3	Septin-6	06.wrz
62214604	62272560	44616580	43094496	56340888	66429816	68565568	174847872	42919832	87314080	5368388	7599256	33561552	47536460	32243092	41442288	5867775	67855912	30635240	39132520	41272252	4733088	70028320	21860428	31564852	58176012	5355718	36160484	54716448	3782031	71974632	58991632	53963184	47795920	28184984	42615084	25	1	0	44842	1	-2	G3V1Q4	G3V1Q4		07.wrz
1510706816	1382049280	1510567936	1493103744	1474559744	1330412928	153539296	1341353856	1287430528	1425771392	1422311168	1394265728	1492021376	1328415872	1307270784	1359717632	1457826304	1254923264	1243853696	1448251904	1097177088	1281224960	1328111104	1135852672	132669248	1159531136	1359762944	1304364800	1249313664	1345714176	1189195904	1087591680	137738160	113477040	1254232320	1170188544	27	27	3	50679	0	32331	Q16181;E7ES33;E7EPK1;Q16181-2;H0Y3Y4;Q5JXL7	Q16181;E7ES33;E7EPK1;Q16181-2;H0Y3Y4	Septin-7	07.wrz
314666112	267222464	265394048	274172704	305464000	254575280	255534720	295268096	281314528	237694896	233967344	273565152	290769568	247315568	335015520	253634208	234912800	277816064	149944480	246733968	233192656	2231511	25402264	231799568	80571392	56423128	21621336	38065552	55421592	52026572	46399232	70878536	12337984	160180144	158561824	94210448	8	6	6	55756	0	21445	Q92599;Q92599-4;A6NMH6;A6NFQ9;F8W8I8;Q92599-3;Q92599-2;A0A087X142;C9JV02;C9J4G8;A0A0A0MRP8	Q92599;Q92599-4;A6NMH6;A6NFQ9;F8W8I8;Q92599-3;Q92599-2;A0A087X142;C9JV02	Septin-8	08.wrz
3007292672	3192069376	2676127232	2803652352	87738704	2857222400	3534576384	2847333888	3049140992	2740143104	3943156224	2602820352	2686061056	2167394560	1839563392	2154892800	3083360512	1845398016	3077060864	2683666432	1327572608	1380235392	2431089152	2140920448	3256935680	3062903808	3255736064	3092506368	3104761856	3135543296	2658231040	2396590336	351318912	3181244928	3317441792	279406080	21	1	1	38518	0	14539	Q9UHD8-4;K7EL40;K7EK18;K7ER52;K7EIE4;K7EQD7;K7ELJ9;K7EIR4;K7EKN4;K7EN52;K7ENQ5;K7EJZ2;K7EQ08	Q9UHD8-4;K7EL40;K7EK18	Septin-9	09.wrz
1381601536	151739536	1247251968	1627575936	1402615936	1331431040	1625174400	1433956480	133124200	158850912	1597124352	1597167104	1494942976	1333518080	1471701376	1405489536	1526526336	1464273920	1546784128	15029812	1031431680	1275454976	137803120	1222692352	104778624	1195345152	1176162176	1095612544	1023750272	10317274	8611953664	9132457984	1045431744	1028262336	1042421568	9566917632	32	32	12	64681	0	32331	Q9UHD8-5;Q9UHD8;Q9UHD8-2;Q9UHD8-7;Q9UHD8-3;Q9UHD8-9;Q9UHD8-8;K7ENL0;K7EPY1;K7EJV0;K7ER14;K7EJ51;K7EJL9;K7ERG1;K7ER34	Q9UHD8-5;Q9UHD8;Q9UHD8-2;Q9UHD8-7;Q9UHD8-3;Q9UHD8-9;Q9UHD8-8	Septin-9	09.wrz
192535616	1744721024	1463515520	2093541888	2009268608	1976482432	2233057024	2052994432	1718816384	220046496	1883563008	2082981504	2459714304	1963815680	2546564096	2014096128	2798101760	2363154432	2483584768	2732946176	1291049728	1935935104	202508976	1478316416	4705494528	4979386880	4984597504	565518464	4854936064	4384858624	4305374208	3772527872	383296544	3463861504	3275185664	3957183488	16	10	10	49398	0	29856	Q9NVA2;D6RGI3;D6RER5;Q9NVA2-2;D6RDU5;H0Y961;D6RDP1;D6R9Y6;H0Y9G8	Q9NVA2;D6RGI3;D6RER5;Q9NVA2-2;D6RDU5	Septin-11	11.wrz
760842112	524496832	633277056	51803968	707770496	580055168	607813056	744119808	6175075	551387776	644939584	677709440	816362560	604423488	48486476	590989376	86554360	611066688	706399616	888902016	359143104	503016832	907137024	437905088	641140416	622858816	63763836	679286400	706583872	67820272	4736576	534745728	593498560	491817728	560745152	368400896	5	5	5	1779	0	14497	O60613;A0A087X1G7;A0A0B4J1S4	O60613;A0A087X1G7;A0A0B4J1S4	15 kDa selenoprotein	15.wrz
957996	4867984	0	1325874	4506248	3743821	4588203	4015981	5266493	4562912	357952	5128449	4110475	0	2292674	3642569	9856718	5148393	5765682	5586118	0	0	0	0	0	0	4872557	0	0	16680209	10246775	15470499	0	0	0	563445	10	4	4	16329	15394	5526	P01023	P01023	Alpha-2-macroglobulin	A2M
86597040	76677232	102025296	76114168	25365994	59376312	23134888	92882872	138261184	84164272	72615704	6215762	355909	193316944	66968552	170762976	34005200	63985896	43471932	120969936	50371712	109867672	59590524	99245544	331422496	314118656	467917088	357903936	193494496	5925853	0	11318534	314000000	3010474	105762800	4041488	25	25	25	1611	0	13077	A8K2U0;H0YGG5;A8K2U0-2;H0YH14;F5GXP1	A8K2U0;H0YGG5;A8K2U0-2	Alpha-2-macroglobulin-like protein 1	A2ML1
620336960	597320064	896766592	625729408	1146955008	83094192	1197313024	66481320	778986624	1119749376	100539864	1350485888	737199808	830322560	589114688	61216532	667798528	1249379200	543095872	655506176	866883584	86529320	1012612096	590079104	953433152	1002950464	762985024	1072739840	875969216	828783552	1208892672	141421184	857885504	968229184	1147877120	1234607872	8	8	8	59573	0	71436	Q9NRG9;Q9NRG9-2;F8VZ44;F8VUB6;H3BU82	Q9NRG9;Q9NRG9-2;F8VZ44;F8VUB6;H3BU82	Aladin	AAAS
601910144	637481216	839006272	651279040	1018072064	689928384	860056256	670877824	523158112	972298368	96269984	953811840	593165568	614883584	593040064	480073248	473220736	740995584	546620608	642175488	793220736	614340736	746542528	686828864	391251392	360993888	324572896	371351392	476318272	503129088	479974592	383499776	350265600	305857600	288029376	274188096	16	16	10	75143	0	36979	Q86V21;Q86V21-2;E7EW25	Q86V21;Q86V21-2	Acetoacetyl-CoA synthetase	AACS
0	0	0	0	0	0	0	0	0	0	0	0	0	0	0	0	0	0	0	0	0	0	0	0	0	0	0	0	0	0	0	0	67010744	0	66160508	0	7	1	1	30061	1	-2	Q86V21-3	Q86V21-3	Acetoacetyl-CoA synthetase	AACS
0	16994784	0	17936546	35571404	36682008	45605544	30245814	46799324	48100660	71624288	0	4220455	20995738	19506452	16476465	4375244	29414988	43959040	5029458	21524056	234177	35405444	34368216	0	0	0	0	0	0	0	0	28445824	0	0	0	1	1	1	24856	5632	18638	Q7RTV5;H0Y5J5	Q7RTV5;H0Y5J5	Thioredoxin-like protein AAED1	AAED1
204108384	201486416	8537714	246060144	220198784	171332256	205524928	215430976	25664084	244630688	283620128	289732928	141241728	197365648	226429312	171211472	17208744	233215968	251993488	237043968	249433040	283225920	269352384	241799280	58909644	2891401	78871848	125209616	190605712	2189936	176193840	116873704	190065584	198613680	192578528	230752784	3	3	3	34593	0	29921	Q6PD74;Q6PD74-2;H0YL49	Q6PD74;Q6PD74-2	Alpha- and gamma-adaptin-binding protein p34	AAGAB
126574112	136635216	102048024	143066320	113441048	143063136	144851200	135609632	119722264	108373824	112084800	109175640	123273488	83593576	170274528	111566680	11368346	108047240	130428832	146377792	128410720	1447002	177319792	178984192	36448520	64542532	38187972	48843112	99888720	38599992	29297774	66731980	58840400	0	57632728	30990536	6	5	5	54448	0	16252	A0A096LP25;Q6ZSR9;A0A096LNZ0	A0A096LP25;Q6ZSR9;A0A096LNZ0	Uncharacterized protein FLJ45252	AAK1
223243904	201454496	224650672	227778224	286656512	244439104	329501920	269779008	115963336	246828560	266851552	207679440	23640238	253996016	139024384	191556912	166758464	151032080	156352432	167247552	194793472	149887968	163416176	173206912	4035147	92612896	74910736	58536944	6889222	35655720	74289080	38895664	116834720	93596920	102676440	88773080	13	13	11	10388	0	26713	Q2M2I8;Q2M2I8-2;E9PG46;A0A096LP60	Q2M2I8;Q2M2I8-2;E9PG46	AP2-associated protein kinase 1	AAK1
16398597	147729792	141155184	133804200	104457832	134033952	185730400	124864400	119462896	185425248	147545856	180382384	205173408	222552512	173076144	160658400	319387904	297783104	0	103366104	86407328	20344944	279635936	83827480	119847912	129632440	218618240	164430560	27787974	70947856	0	36886700	0	60029308	23923122	0	3	3	3	13332	12628	304	Q9H7C9;E9PJP1;E9PLK9;E9PNP3;K4DI89;E9PR47;Q9H7C9-3;Q9H7C9-2;E9PIQ4	Q9H7C9;E9PJP1;E9PLK9;E9PNP3;K4DI89;E9PR47;Q9H7C9-3;Q9H7C9-2	Mth938 domain-containing protein	AAMDC
224768912	156287424	16772003	185293152	152388688	115775744	154933584	180519616	226814240	27563784	222908144	281710624	117241432	146327760	111669088	12945783	166901424	119909064	172863248	177972000	101456280	128012528	202448464	11301017	231203680	351681504	270537728	350192512	464977824	380568704	381244352	400662976	499845824	774576576	682421696	628790016	5	5	5	4675	0	64146	Q13685;C9JG97;C9JEH3;H7C0R2;C9JTS3	Q13685;C9JG97;C9JEH3	Angio-associated migratory cell protein	AAMP
278513600	265149120	385085536	382154560	541419264	554742464	525142048	457698400	679284032	734551552	711931968	683809024	513153568	41025776	517704960	347404000	573511296	510601792	492022976	439275264	492418560	756598528	484860800	499185600	253692368	321702720	386687552	249873056	408390272	524204928	579909440	614247232	464421824	487100320	61246796	685586304	7	7	7	43472	0	32331	Q9Y312;A2A2Q9	Q9Y312;A2A2Q9	Protein AAR2 homolog	AAR2
584606912	6679121920	6088868864	6575537152	7230552576	779680512	7704679424	7288017408	5150853120	5864922112	5529314816	5856627712	6437767168	6058259456	5698191872	6106825216	8318158336	7343600640	8101354496	8976320512	4655635968	558397568	7349915648	641282496	1085796992	1103546368	1036316608	1182314112	9484812288	9329057792	9440207872	1045212544	7696482304	6856871424	6913083904	7105355776	49	49	49	10681	0	32331	P49588;P49588-2;H3BPK7	P49588;P49588-2	Alanine--tRNA ligase, cytoplasmic	AARS
666838976	52347924	818235520	542004352	708400640	597697664	652071104	604298368	409434304	54087604	424089088	39998584	596018496	68621952	611196288	694427072	509612256	870088768	558972480	543859712	587248896	527965696	733864640	52250380	354224416	395120096	371200704	459880352	462967520	437679136	561199680	602339840	222580480	244060144	224294112	183246256	29	29	29	10734	0	32331	Q5JTZ9	Q5JTZ9	Alanine--tRNA ligase, mitochondrial	AARS2
404760320	365924384	480684352	451760384	584235456	541627008	447397664	485222272	601556288	566223744	663239552	583285696	3321223	421732512	338841568	467283552	349749408	430650944	401779904	413364192	60428484	59720440	705678016	684081088	449989024	497891648	368492544	642905728	439834688	495471456	534839072	775517376	448263616	64118388	520537152	435661824	11	11	11	58752	0	17641	Q9BTE6-2;C9J5N1;Q9BTE6;Q9BTE6-3;K7EQ85;L7N2F4;H7C054	Q9BTE6-2;C9J5N1;Q9BTE6;Q9BTE6-3	Alanyl-tRNA editing protein Aarsd1	AARSD1;PTGES3L-AARSD1
6187497	9294087	23681018	11590563	1735079	113288240	36386880	6093802	161724224	44043768	4286502	42089900	86884136	99485528	117164832	1062042	0	7916706	5077451	4527387	4730684	4915201	0	61820092	42843696	38506448	30008228	40516968	21026164	31583776	29038668	37218432	21924068	22877508	23387572	36813272	6	6	6	1226	44176	41832	Q4L235;Q4L235-3;Q4L235-4;R4GNB1;Q4L235-2;E9PH98;D6RJA2	Q4L235;Q4L235-3;Q4L235-4;R4GNB1;Q4L235-2	Acyl-CoA synthetase family member 4	AASDH
450642112	519302240	359730752	459740448	448512448	553558080	636330816	338548864	559450880	468584224	584844928	383154912	491511648	34931640	308428352	322675648	411508192	51845520	643512512	455819168	472900032	402594720	587294400	561747392	2180534784	2254417408	1938096384	1867348608	224919360	2109297280	1855986816	2015966720	2244442112	2659973888	1916013056	2641145856	17	17	17	35776	0	14221	Q9NRN7;E9PLW6;E9PNF3;Q9NRN7-2	Q9NRN7;E9PLW6	L-aminoadipate-semialdehyde dehydrogenase-phosphopantetheinyl transferase	AASDHPPT
979394	4670099	20658208	0	22844364	0	5412747	10902516	1941164	0	0	0	19534448	0	7830193	0	724681	10911679	1270988	7347441	7941501	0	0	0	13022894	5949526	62868172	11354027	41217840	39267256	40280952	18118192	48484016	55135616	50885576	43324176	12	12	12	10213	0	14973	Q9UDR5;F8WAH1;F8WE53	Q9UDR5;F8WAH1;F8WE53	Alpha-aminoadipic semialdehyde synthase, mitochondrial;Lysine ketoglutarate reductase;Saccharopine dehydrogenase	AASS
210764832	127789952	24715800	146629520	321547936	312558432	261739968	203602128	226151552	340420096	294977056	376165120	341426624	337339488	276794656	333662560	25046798	263592768	43127456	322648768	389156480	427558464	418574272	523027648	39388304	513648992	459153920	640148032	605484864	704935296	585149632	812226240	846381632	659994304	680632000	668384704	12	12	12	63132	0	20047	Q9NY61;A0A087WW41;A0A087WWS8	Q9NY61	Protein AATF	AATF
307480064	36375244	337536960	425758016	302383808	277004832	23732346	250996720	230338816	178371392	157510432	232468544	302148128	248058976	321566048	406554112	324325664	248404352	381676896	327339744	254312208	253266336	28829826	193432128	287227936	497817248	369695040	402670848	321763648	193219952	308012320	268619584	148627520	253933488	195813120	24556484	11	11	11	56438	0	7601	P80404;H3BRN4;H3BNQ7;H3BPW8;H3BRJ1;H3BMJ9;H3BRT1	P80404;H3BRN4;H3BNQ7	4-aminobutyrate aminotransferase, mitochondrial	ABAT
19831076	19334976	31291856	43074748	38402952	47098384	3456678	51393664	21833682	54214568	55382188	35815448	3183983	25318106	27433948	40783632	120533040	116300056	134464576	89264960	53347448	77848880	23049724	17300560	44372572	43305664	56152248	21435372	42508080	48561348	53547052	32039772	3951926	28960252	43056132	29555676	4	4	4	29323	1	-2	Q86UK0;Q86UK0-2	Q86UK0;Q86UK0-2	ATP-binding cassette sub-family A member 12	ABCA12
10313677	1985473	55249828	4730777	45933056	32729704	22132504	50422124	52602100	26022412	6728284	28812604	18558844	31688124	40407600	30971056	48408576	43496400	23108624	28958476	5298854	33152076	1193659	0	3444791	0	0	0	0	0	0	0	0	0	0	0	1	1	1	26987	1	-2	Q9BZC7;Q9BZC7-3;H0Y8C9;H0Y8D6;J3QSS3;A0A087WXK5;Q9BZC7-2	Q9BZC7;Q9BZC7-3;H0Y8C9;H0Y8D6;J3QSS3;A0A087WXK5;Q9BZC7-2	ATP-binding cassette sub-family A member 2	ABCA2
6708827	0	5908901	5112566	7137106	3952869	12340024	6765136	856475	7073153	6526983	4972602	6449103	6034052	7290607	4913422	1490921	3140733	0	6695079	3205829	3001121	3014115	0	3616341	2693041	4679534	6498482	735733	12026486	12227354	2577222	0	4698502	0	7659309	4	4	4	23435	1553	57731	Q8IZY2;Q8IZY2-2;H0YCN5;A0A087WZX6	Q8IZY2;Q8IZY2-2;H0YCN5	ATP-binding cassette sub-family A member 7	ABCA7
0	0	0	0	0	0	0	0	0	0	0	0	0	0	0	0	0	0	0	0	0	0	0	0	0	0	0	0	0	0	0	0	0	11019386	13550933	9561939	3	3	3	14148	29855	45718	P08183;P08183-2	P08183;P08183-2	Multidrug resistance protein 1	ABCB1
217045616	176289872	238942240	227583360	334328320	20740402	229963136	213434928	43071992	296576960	309170752	238018464	310427296	290914336	317650176	330417408	186940880	297794112	284282912	289839232	45561508	370454528	285861312	385309408	298535168	384686432	283096800	39835116	225537856	216588128	289341728	343869792	290590400	285505728	324460384	383359328	20	20	19	79147	0	13044	Q9NRK6	Q9NRK6	ATP-binding cassette sub-family B member 10, mitochondrial	ABCB10
7749224	6401239	1700972	19791298	13129093	9092882	42042144	4959186	48656972	738324	6118836	12527374	29785792	8496285	3547551	119412	14175487	2629564	8427463	8428742	62339416	25081220	66443944	29519332	71465088	33145672	57170916	36100080	37015312	39511072	72186328	44503488	58007064	45132792	66517976	120901312	9	9	9	93884	0	64663	Q9NP58;Q9NP58-4;H7BXK9	Q9NP58;Q9NP58-4;H7BXK9	ATP-binding cassette sub-family B member 6, mitochondrial	ABCB6
247068736	334456384	552208320	415847776	512856736	309313440	58745360	394859648	442764512	419644640	539796352	401112640	399618368	306367296	484039360	246597568	421350144	544376960	548867456	509152736	501588640	543561152	435340576	246765936	566595200	340347328	486409696	529652864	496712832	322834496	490915072	494679776	434280768	434659520	489585856	453467008	19	19	19	8264	0	32331	O75027;O75027-2;B4DGL8;A0A087WW65;O75027-3;E9PJR8;E9PNQ5	O75027;O75027-2;B4DGL8;A0A087WW65;O75027-3	ATP-binding cassette sub-family B member 7, mitochondrial	ABCB7
572085440	581146176	718417536	632835840	468232512	560209088	261623152	409452384	631734656	577001664	577371968	645827584	443279328	819313728	374090368	595807360	316232128	49546924	396767936	455403392	51398312	507315136	606147968	692059520	356458048	332945664	292414944	441369344	379324576	179726640	339738944	33193918	400274656	225578512	282554944	362759360	17	16	16	79988	0	31912	Q9NUT2;Q9NUT2-5;Q9NUT2-4;Q9NUT2-2;Q9NUT2-3;C9JYI3;C9JTY4;H7C5K9	Q9NUT2;Q9NUT2-5;Q9NUT2-4;Q9NUT2-2;Q9NUT2-3	ATP-binding cassette sub-family B member 8, mitochondrial	ABCB8
195593472	179877920	160402736	186888016	161981696	214583968	176864048	197690528	150716688	16185537	212434624	149787216	20594896	196831088	221941264	179219888	191763728	143504784	165247328	185923472	176878624	182501040	142763504	177266384	245383312	267008832	32471448	319424768	300444032	302400224	295873152	306237568	253743824	25295820	243508096	150602848	29	29	28	17159	0	21893	P33527;I3L4X2;P33527-2;P33527-9;P33527-5;P33527-3;P33527-6;P33527-4;P33527-8;P33527-7;A0A0A0MS99;O15438;O15438-4;O95255;A0A0G2JMM2;A0A0G2JMG3	P33527;I3L4X2;P33527-2;P33527-9;P33527-5;P33527-3;P33527-6;P33527-4;P33527-8;P33527-7;A0A0A0MS99	Multidrug resistance-associated protein 1	ABCC1
37133608	3353402	16268631	49810008	45080940	35894052	51706388	39377840	16735768	3016208	38345468	16577285	42901796	26034386	21253144	20363616	34972848	20379016	47316684	29491364	129473	27057456	18711064	11513078	8083707	86816480	8202461	8983072	104601088	81168632	8482537	96960016	142797616	136557840	100951104	116213448	16	15	15	14952	0	68203	O15439;O15439-2;O15439-3;O15439-4	O15439;O15439-2;O15439-3;O15439-4	Multidrug resistance-associated protein 4	ABCC4
87218776	81428704	94735392	82236416	97116576	83908928	146689648	84148888	102997096	125101400	123474296	123421504	83771072	95923920	100636560	99860048	66132472	140412432	80731552	88077192	160460128	130467584	211218560	19126496	33534536	17338480	25325680	38631408	34876048	55552768	35733584	40286276	33940416	32669732	37757300	42690484	7	7	6	82936	0	86769	P33897;A6NEP8	P33897	ATP-binding cassette sub-family D member 1	ABCD1
252943232	37899368	388143360	40053624	589501952	426326048	601764288	455651520	374586496	221461008	283192352	338869216	507718400	570187456	532427200	572252416	421190624	485390592	366845600	339319360	388093824	397676800	304534816	320258336	498307840	46962028	579429440	581475392	483633824	702246528	683140288	478377856	414166080	545070464	3353892	447060480	11	11	11	75475	0	14518	P28288;P28288-2;P28288-3	P28288;P28288-2	ATP-binding cassette sub-family D member 3	ABCD3
15208783	10388964	10626676	0	19853568	20285992	1670147	21469336	0	20226248	17225126	17973904	0	23862496	1095365	0	11178216	24038472	2426859	18353068	11518503	18382900	15583318	0	0	4648398	611938	6294763	4120987	0	4628973	8307549	0	4054467	5574384	3208762	2	2	2	68597	98453	30845	O14678;E9PPB6;E9PI46;G3V3W1;H0YJ78;G3V4U7	O14678;E9PPB6;E9PI46;G3V3W1;H0YJ78;G3V4U7	ATP-binding cassette sub-family D member 4	ABCD4
0	0	0	0	0	0	0	0	58429616	0	0	41892576	59385276	61701604	4284366	0	56492392	0	0	108245896	65118608	61186664	93230344	44150848	0	288482528	163625968	0	0	0	0	0	231818528	0	0	262316240	6	1	1	16236	43636	38607	H0Y990	H0Y990		ABCE1
4374467072	4163225088	4346544640	4643788288	4851396096	4896842752	5827307008	5126054400	5166974464	5449259520	5255638016	5108909568	3500589056	4315086848	3794060544	372187776	4597163520	4438368256	4102896640	3894039552	3781552128	3778755328	4157206016	3703055360	7219503104	7200566784	7937469440	8308244480	8505828352	9053328384	679553728	9149889536	9142128640	6664373760	9789514752	9586635776	29	29	24	67314	0	32331	P61221;D6R9I9;D6RGF4	P61221;D6R9I9	ATP-binding cassette sub-family E member 1	ABCE1
4645167104	5165688832	4758120448	4430172160	5314625024	4144107264	4981688320	4787919872	4211846912	4464853504	5107286528	4250489088	4864289792	4170327296	4217364992	4273556224	4708250624	4199514880	5034564096	5479613952	3927688960	3532475904	4424787968	3876279040	2797241344	38227072	3810951680	3680041984	3440717824	3742401536	3479424256	3715522048	3375508992	3313460480	3479169024	3444884736	38	38	38	95925	0	32331	Q8NE71;Q8NE71-2;H0YGW7;Q5STZ8;A0A0G2JIC2;F5GYK6	Q8NE71;Q8NE71-2;H0YGW7	ATP-binding cassette sub-family F member 1	ABCF1
170691888	1816990464	1464830592	2294057984	2614626560	2512837120	3362191104	2540430848	3187873792	3168505344	3665417216	3035703552	1906188160	1664510080	1484332288	1586294784	2601375744	2170851072	3136308992	2758232832	2342824960	2888200448	2942685440	2432502528	1707009920	2239785728	2265247488	1627446144	1965019904	2109168000	2009533440	1887754752	24346664	2228163584	2118701056	2061282560	23	23	23	71289	0	16849	Q9UG63;Q9UG63-2;C9JHK9;C9JZV3	Q9UG63;Q9UG63-2	ATP-binding cassette sub-family F member 2	ABCF2
1047823424	937330240	869092480	930150784	1122104064	1217232768	1285279616	874411584	1475773312	1360093824	1320267520	1093380736	85129384	966091648	686743872	716816640	1017303232	1148423552	1181796992	79580752	1733719936	1104030080	1160273024	104640464	1671884800	1614579840	1449925376	1657848832	1655922944	1683585664	2064982528	2302844928	172234064	2342653696	2149091072	2114844800	24	24	24	79744	0	2471	Q9NUQ8;Q9NUQ8-2;F8WCU6	Q9NUQ8;Q9NUQ8-2	ATP-binding cassette sub-family F member 3	ABCF3
7029978	0	25782620	0	5578584	0	5170707	0	0	0	0	0	0	0	0	0	0	0	0	0	0	0	0	0	0	0	0	0	0	0	0	0	0	0	0	0	2	2	2	72313	8547	33657	Q9UNQ0;Q9UNQ0-2	Q9UNQ0;Q9UNQ0-2	ATP-binding cassette sub-family G member 2	ABCG2
5424717824	5431777792	6011947008	5582123520	4785144832	4191397376	3150577152	4905012224	4044276736	4025271552	3548828416	4780311040	6734094848	5641277952	6331938816	6353499648	6235180032	6137054208	613902016	4879821312	5450338816	6193251840	6244776448	578108224	262172208	3107426304	34630536	3069817088	3238936064	2666888704	3148975616	2520557568	3157208320	2689144320	2790387712	3002415616	9	9	2	33932	0	32331	Q9NUJ1;Q9NUJ1-3	Q9NUJ1	Mycophenolic acid acyl-glucuronide esterase, mitochondrial	ABHD10
122859504	174826912	206602080	75953168	120062392	132311440	102162712	142560656	126393920	8816562	116858128	97086840	179735408	79731808	113269824	142130816	11006119	93530688	97739448	200252064	60544544	88446384	105470840	25922908	73744816	79610408	10386635	56837120	53709720	8708526	48560000	64693648	73887952	4687907	77857016	45122532	8	1	1	1691	34551	21091	Q9NUJ1-2	Q9NUJ1-2	Mycophenolic acid acyl-glucuronide esterase, mitochondrial	ABHD10
1184558464	1131285376	1525972864	1012727232	1119388928	1211882240	124097632	1199371264	654039168	1128873728	972606912	1328852352	1540891008	1561621888	1426906368	1496521216	1088377600	1295897984	790724800	972957248	1146210048	1136462592	1104278144	1079321472	308502720	340053536	106229072	351698368	223605792	207623344	476295904	492046848	25502264	213322864	467639424	223761872	7	7	7	3469	0	39609	Q8NFV4;Q8NFV4-4;Q8NFV4-6;H0YC52;C9J7Q4;H7BZ58;Q8NFV4-3;Q8NFV4-2;H7C396;Q8NFV4-5	Q8NFV4;Q8NFV4-4;Q8NFV4-6	Alpha/beta hydrolase domain-containing protein 11	ABHD11
473424064	218725328	401310976	377932064	124271608	15717313	134556032	271656000	242336912	32959672	114936896	111543608	256061584	164369312	28404032	245315552	219502240	230261248	230948464	445703936	396122176	195150848	241878400	314703040	226640880	74580088	104201912	59104052	130998232	208953552	135811728	6427729	142568928	290592960	181030752	133088336	7	7	7	45096	0	63121	Q8N2K0;Q8N2K0-3;Q8N2K0-2;I3L294;Q5T712;I3L440;I3L380;I3L1V0	Q8N2K0;Q8N2K0-3;Q8N2K0-2	Monoacylglycerol lipase ABHD12	ABHD12
3020622848	2386504960	3235619584	2338462720	2396308736	1708897792	1921019648	2176815872	161214496	1564929152	2072600192	2173746944	2450439680	2981266432	3453436416	3477643008	251710576	2765761280	3395847680	2538671616	1742582784	2167964928	1661132160	1983795328	2377863936	3674221056	2659714560	2719404288	2095380736	2249964288	260934400	2982712832	2469410816	3117947648	2364444672	2328123904	8	8	8	22345	0	74181	Q96IU4;F8W9U3;B4DQI4;Q96IU4-2	Q96IU4;F8W9U3;B4DQI4	Alpha/beta hydrolase domain-containing protein 14B	ABHD14B
30823334	20516586	51008040	28200416	22983732	51191080	3121315	73798952	26115012	53863168	2227278	26041108	0	42665960	49440880	38384996	43047312	53951572	14823166	40261376	35286932	72164336	44460600	33512228	7119494	124643144	126480480	88474912	1081862	89333424	121465912	15512656	144737856	7935223	95694504	92598400	3	3	3	51771	16116	70553	Q6UXT9	Q6UXT9	Abhydrolase domain-containing protein 15	ABHD15
198412256	116800528	346960800	330693536	178112144	315941664	147612976	294782592	331381440	3432216	295582112	229230048	81184928	301216064	203689216	176535200	182735920	219217808	169199792	156654480	272722048	219678992	67902472	157504304	148550832	118525328	109318576	102138992	101608632	100013192	62066688	111731688	79529256	118311736	55836632	104493864	8	8	8	63243	0	9053	O95870;A0A0G2JJD3;O95870-2;A0A0G2JI89	O95870;A0A0G2JJD3;O95870-2;A0A0G2JI89	Abhydrolase domain-containing protein 16A	ABHD16A
0	0	0	11600591	0	0	0	0	0	0	10228877	0	19760854	0	0	17177244	10778699	0	0	11436514	0	0	0	0	0	0	0	0	0	9288214	0	0	0	0	8991263	0	3	3	3	32214	6632	1774	Q5VST6;Q5VST6-2;Q96GS6;Q96GS6-3;Q96GS6-2	Q5VST6;Q5VST6-2	Alpha/beta hydrolase domain-containing protein 17B	ABHD17B
25215288	0	66177636	48063536	115333640	90534992	88278088	40779428	0	122605352	102318712	65320660	41468864	0	18798456	0	47034588	68313944	41885152	42353304	8907566	83812240	7329685	100235760	0	0	0	0	0	0	0	4079064	0	0	0	0	2	2	2	46008	68688	17418	Q8WU67;J3KTE1	Q8WU67;J3KTE1	Phospholipase ABHD3	ABHD3
17504608	0	0	0	0	22427552	0	31532736	0	0	1990507	0	0	0	0	0	0	0	0	0	0	0	0	0	4077956	0	33527228	40141816	0	24672784	44579536	60174628	0	21633932	26008348	0	4	4	4	38794	0	9725	Q8TB40;Q8TB40-2;H0YFD5;F5H067;F5H6T0;J3KMW0	Q8TB40;Q8TB40-2	Abhydrolase domain-containing protein 4	ABHD4
94362064	57971816	87731592	91704464	111764760	9345233	102079936	95993336	96231976	105524384	109545632	92737184	73780656	107502208	125736560	80782720	96517328	164750656	56376976	61730916	152512464	58336928	105212976	94804208	50253124	74536160	51091280	48204700	5299302	51704656	105172672	86219008	49439152	55026188	57761584	49760032	3	3	3	3833	0	40322	Q9BV23;A0A087X2C5;C9J010;C9JNE7	Q9BV23;A0A087X2C5	Monoacylglycerol lipase ABHD6	ABHD6
1918420992	1561258112	1989883776	1374251264	2089543296	2211575808	2098926208	1678991616	1267398912	1402737152	1472447360	1863317120	2006812672	1783048192	1697435264	1329631488	2161730304	2248911104	1396213376	1524702208	1590842624	1807369600	1495926272	2016337408	1054528832	148727584	1289256832	1090619904	1717122176	1887421184	2022110848	2295527424	1350411520	1457794944	1522192512	1387686528	14	14	10	5508	0	79016	Q8IZP0;Q8IZP0-3;Q8IZP0-2;A0A0A0MRT6;Q8IZP0-4;Q8IZP0-5;Q8IZP0-6;Q8IZP0-9;Q8IZP0-12;B6VEX4;Q8IZP0-10;Q8IZP0-8;Q8IZP0-7;Q8IZP0-11	Q8IZP0;Q8IZP0-3;Q8IZP0-2;A0A0A0MRT6;Q8IZP0-4;Q8IZP0-5;Q8IZP0-6;Q8IZP0-9;Q8IZP0-12;B6VEX4;Q8IZP0-10;Q8IZP0-8;Q8IZP0-7;Q8IZP0-11	Abl interactor 1	ABI1
12208607	0	9086527	126087	0	9467029	8556791	9669626	0	1389999	0	10587065	15039215	20903034	13267814	30138744	10609252	0	7729316	10775257	0	0	12556061	0	12045206	0	0	5123573	11665852	19470318	0	13160524	0	0	25655212	19647242	8	4	4	55663	16543	81591	Q9NYB9;Q9NYB9-2;E7EW77;E7EP65;A0A0C4DG21;F8WAL6;Q9NYB9-4;B7Z836;Q9NYB9-3;E9PEZ7;H7C3Q7;H0Y6B5	Q9NYB9;Q9NYB9-2;E7EW77;E7EP65;A0A0C4DG21;F8WAL6;Q9NYB9-4;B7Z836;Q9NYB9-3;E9PEZ7	Abl interactor 2	ABI2
89638200	82730792	53420308	98044408	49958132	90632520	44753300	100611760	94430840	72968512	96383904	95339408	84961768	88926272	80358376	82591728	88084000	120270768	111300040	82425904	122676968	71313856	78308984	95227728	15894811	165300064	11454221	153824752	105398992	75366664	90138864	14009832	187479728	198078176	91498128	116921056	4	4	4	39035	1514	4952	Q9P2A4;Q9P2A4-2;I3L1X2;I3L3W4	Q9P2A4;Q9P2A4-2;I3L1X2	ABI gene family member 3	ABI3
59257268	57216508	52757484	39950712	85730680	60893664	48504912	66390492	37712672	50666076	54474528	57351936	63308412	4185452	48299176	53667152	46043836	64815296	61424424	3748958	35353044	38664048	18015156	271925	66551664	39744712	101422800	77507064	36691152	8472848	7767176	14537393	39260696	3246897	71769536	22501752	10	10	8	12834	0	15214	P42684;P42684-6;P42684-7;P42684-5;P42684-4;P42684-10;P42684-2;P42684-3;P42684-8	P42684;P42684-6;P42684-7;P42684-5;P42684-4;P42684-10;P42684-2;P42684-3	Abelson tyrosine-protein kinase 2	ABL2
14750766	5999685	5627236	1318439	30062198	0	29630932	16746918	0	0	0	35988752	24677248	19593416	1012453	12412616	25221080	0	21353216	0	9881861	11049112	0	0	92479896	52536200	14271356	101902336	79231024	47174528	33707800	4936818	3849838	46528620	43187488	36055484	5	5	5	87687	16661	84807	O14639;O14639-5;J3QSX6;F8W8M4;A0A0A0MRL6;O14639-4;O14639-3;O14639-2;O14639-6;H0Y7N6;F6XFR5	O14639;O14639-5;J3QSX6;F8W8M4;A0A0A0MRL6;O14639-4;O14639-3;O14639-2;O14639-6	Actin-binding LIM protein 1	ABLIM1
452381184	613752832	491223072	469169408	562773504	559166848	431693248	579703232	394960640	43891056	440799648	460444160	552751744	44076392	443162592	444969216	519861632	588671616	565806848	578546944	289646528	381125408	432244768	341408800	238097616	290936960	286889696	205340192	204522496	205390016	197407952	246809264	272974304	223564976	224902688	233204912	19	18	18	97597	0	39278	Q12979;A0A0G2JQ41;Q12979-4;Q12979-2;B7Z683;Q12979-3;I3L2P5;A0A0G2JRJ1;I3L3W0;I3NI05;I3L1U8;A0A0G2JQT5;I3L379;I3L4Y1;I3L0R7;I3L2C0	Q12979;A0A0G2JQ41;Q12979-4;Q12979-2;B7Z683	Active breakpoint cluster region-related protein	ABR
5431599104	5876447744	5219666944	676296128	5785357824	5455575040	6093115392	5064647680	4984671232	6250968064	569002304	4939113984	7697823744	640689152	876758528	7218305024	9959507968	776348288	1284457088	664090112	6157820928	6778915328	6646134272	7245061120	1727973248	547850176	931749888	795477952	1113891200	1339867008	985224640	808978240	1697281152	1027223360	666351296	57917132	4	4	4	90564	0	32778	Q9P1F3;Q5SZC9	Q9P1F3;Q5SZC9	Costars family protein ABRACL	ABRACL
448192704	547858176	819024512	532725856	658915520	634459392	609556224	388985600	674933632	575361152	634561344	808746560	312342656	606503424	446883232	575032064	214984656	734857152	438150080	357455840	8089953	653344640	568606912	576265856	838838592	831908032	752588160	1225530880	1275843584	1150843648	103377872	1387870720	1112989696	1224256000	1364952832	1248459392	8	8	8	31079	0	21929	Q9ULW3	Q9ULW3	Activator of basal transcription 1	ABT1
42556944	49741256	110714144	52075416	116729624	415935	49818088	105654344	31673888	64391588	86187248	80476160	93374504	206616800	53402400	118251768	25047308	7570237	80307104	99513552	127331880	123629712	89137464	54977164	46428812	22415968	32023164	36978656	78600640	5258656	111531888	148721168	53514908	107452008	111595304	68874440	10	10	10	11365	0	20401	Q8N961;Q8N961-2;A6QL63;A6QL63-5;A6QL63-2;A6QL63-3	Q8N961;Q8N961-2	Ankyrin repeat and BTB/POZ domain-containing protein 2	ABTB2
1533051008	1637588480	1843746176	1593400576	1627921152	1906582144	1971210752	1774024448	1544880512	1792355328	1857856768	1917274752	232975424	2294940416	1696752896	1810571648	2227847936	2266524928	1832997376	1760191744	1862205056	2271065088	1828736128	2004073472	719822400	764428096	579357248	748057472	741297600	69502736	70504048	709694976	544124288	775729216	74577488	755864320	8	8	8	44292	0	76202	P09110;C9JDE9;H7C131;P09110-2;H0Y4D4;B4DVF4;F2Z2Q6;F2Z3P7	P09110;C9JDE9;H7C131;P09110-2;H0Y4D4	3-ketoacyl-CoA thiolase, peroxisomal	ACAA1
0	0	0	343244	0	0	0	0	0	0	0	0	0	0	0	0	0	33696464	0	0	0	0	67384688	0	0	0	0	0	14670933	0	0	0	0	0	0	0	16	1	1	36282	1	-2	K7EME0;K7EJ68;K7ER88;K7EJB1	K7EME0		ACAA2
2641376000	2503328000	1770772480	2195529728	1847478656	2012745984	1663425152	1941539072	146780528	1867999488	1643741184	1870381056	2354613504	2236140544	2335876864	2786332928	1954612992	1876205568	1658762880	2000549376	1951124736	1728947072	149434240	1894784384	9896894464	8968467456	8834894848	1009304512	1062130752	9329044480	9260349440	1115399168	8596867072	8635186176	777476480	8526344192	22	22	7	41924	0	32331	P42765;A0A0B4J2A4	P42765;A0A0B4J2A4	3-ketoacyl-CoA thiolase, mitochondrial	ACAA2
479768320	526152448	566384128	613881920	764936768	673739776	70325728	627310976	423257280	416705152	429443296	397644736	489947328	516127488	530271904	529496896	594885760	788273344	700117760	678507008	545273024	610408192	703620928	749159488	562627904	593715264	572099328	611628672	57179496	53283416	661536640	699396928	1078843392	428026464	480003712	418656000	65	65	54	26555	0	32331	Q13085;Q13085-4;Q13085-3;Q13085-2;Q59FY4;A0A087X0W4;A0A0C4DGT1;S4R3S7;A0A087WVR6;A0A087WWN5;A0A0G2JM60;A0A087X2F8;A0A087X126;A0A087WYK6	Q13085;Q13085-4;Q13085-3;Q13085-2	Acetyl-CoA carboxylase 1;Biotin carboxylase	ACACA
9950818	1073448	13624055	9421135	10311427	12112444	16610099	9597043	14693192	20493560	16676201	1210107	3547798	0	0	9212024	1154814	8474913	1581187	0	0	5145778	26806424	0	2024305	0	0	1286131	0	0	0	0	1433119	1472916	3116876	109108	16	5	5	27654	1	-2	O00763;O00763-3;O00763-2;F8W8T8;H0YGH5;A0A087WUA1	O00763;O00763-3;O00763-2	Acetyl-CoA carboxylase 2;Biotin carboxylase	ACACB
72408864	65639024	99913936	113737856	32753014	43366096	46517488	37279144	33862492	38040448	3380748	3963023	54719332	84637712	78120784	68886088	38320456	208863920	57158872	255333888	28169064	36148144	345646	1979961	53702452	100527080	91566328	78557200	69985152	52745588	48073800	5594173	25493504	26064512	35936472	55881400	11	11	11	11883	0	13415	Q6JQN1;Q6JQN1-5;F8W1I9;Q6JQN1-2;Q6JQN1-3;Q6JQN1-4;D6RFF6;F8W179;F8W0Q4	Q6JQN1;Q6JQN1-5;F8W1I9;Q6JQN1-2	Acyl-CoA dehydrogenase family member 10	ACAD10
191268032	139593264	27066720	166599760	182100016	170686768	204412496	74388856	224107632	789815360	461474368	625489472	7013824	232791344	221961776	165027536	13569771	252662448	83651632	146729536	249517536	294374880	512785760	46101316	127602984	67361160	196362336	224277904	98255584	162975872	901581	86514280	193319584	11522311	251217120	340993344	7	7	7	45069	0	13662	Q9UKU7;Q9UKU7-2;Q9UKU7-3	Q9UKU7;Q9UKU7-2;Q9UKU7-3	Isobutyryl-CoA dehydrogenase, mitochondrial	ACAD8
4367865856	3918598656	3355278080	3949344512	4973067776	4470687232	399785120	4351482880	3348056320	3900857088	3165003008	4012688384	5629244928	4514751488	4433421312	3979997440	4428925440	4848259072	3877134848	4912862720	3229818880	4098717696	4157527040	2664277504	2275371264	2104314368	2398743296	2406405376	2567047168	2495345152	2700130816	2605234176	1872573312	179232000	1793006336	2438548224	19	19	19	6876	0	32331	Q9H845;H0Y8Z9;D6RCD8	Q9H845;H0Y8Z9	Acyl-CoA dehydrogenase family member 9, mitochondrial	ACAD9
2837726720	280047008	2491515392	2332878848	2141841024	2325214464	2267079424	2330599168	1616627200	1779964288	1645789824	1809657856	2786018048	2281042688	2938525696	2718519296	2655536640	2447977472	2576472320	2705698048	204589312	2148265728	2944924416	3220878080	2495412992	2414967552	1848239488	2229587456	2478926336	2400614656	2165817088	2011853440	1845837824	2144551680	202088432	1744149376	27	27	27	46588	0	32331	P11310;Q5T4U5;P11310-2;B7Z9I1;E9PJM9;E9PRX4;H0YDT5	P11310;Q5T4U5;P11310-2;B7Z9I1	Medium-chain specific acyl-CoA dehydrogenase, mitochondrial	ACADM
29429918	464892352	32702916	41055384	304692288	271902112	288819712	383505632	35166608	507932160	328146144	52051784	500859840	529831360	628611200	692848896	344056160	358836864	192811952	247038592	407837120	384665952	793688576	406274848	427869792	464157024	595248256	496343264	40076204	191599712	342002272	250761264	466249248	836748608	309801184	277969312	10	10	10	44297	0	50397	P16219;E9PE82	P16219;E9PE82	Short-chain specific acyl-CoA dehydrogenase, mitochondrial	ACADS
409482656	35169104	346725408	239369072	200651184	245374832	171580240	294037920	518488768	52571904	340361504	54531436	460175072	370815232	49470848	443786336	34983760	40399784	35517664	477321344	478720256	559716032	628695936	691709056	416821952	32881196	374738592	352022464	43393712	197377248	266012320	244136432	643830720	443245056	408182240	410381568	9	9	9	47485	0	34803	P45954;P45954-2	P45954;P45954-2	Short/branched chain specific acyl-CoA dehydrogenase, mitochondrial	ACADSB
3688246272	3577899776	3938247168	3844582656	3812362240	3330997504	3979643392	3666063360	3291704320	3709281536	342684192	4011504640	4151056384	3799259904	3942794496	3821902592	3878206208	4822028288	3705206272	3640650240	3471727872	3363841536	3957788928	3040234240	3468768768	3560032768	4101569536	3971789056	3148308480	3286100480	3275770624	3422481920	3704877824	3140208128	3032999680	361278304	28	28	28	70389	0	32331	P49748;P49748-3;P49748-2;G3V1M7;K7EQP4;J3KSR4;K7EJW8;J3QRJ8;J3QKU9;J3KS89;K7EMF8	P49748;P49748-3;P49748-2	Very long-chain specific acyl-CoA dehydrogenase, mitochondrial	ACADVL
287561088	21452204	317033248	340050240	262132128	226559184	13980889	200831920	159450240	236456016	61034748	142264240	275815104	269192480	374410240	351234688	239239728	366491264	370704640	269592480	324632448	300953248	38631288	244973088	249815808	199885984	247478096	264155936	185078336	214292480	207376528	218980064	16986188	168778448	143024480	216111568	13	12	12	81535	0	12225	Q15027;I3L0K9;I3L268;I3L2Z4;I3L3X6	Q15027	Arf-GAP with coiled-coil, ANK repeat and PH domain-containing protein 1	ACAP1
145340400	154253232	123808536	154913872	141249264	102714584	152480720	177016496	156433088	148490320	169415568	137428720	165847536	1392913	223485536	128252896	108481376	18981348	177824592	1453169	157723056	163799744	165064992	113511840	848787136	777851264	666551616	879924992	873960576	899591424	760152768	833192000	940520896	755099328	693947456	804248448	20	20	19	88028	0	32331	Q15057;A0A087X1H5;H7C3K3;H7C3Q8	Q15057;A0A087X1H5	Arf-GAP with coiled-coil, ANK repeat and PH domain-containing protein 2	ACAP2
0	0	0	0	538053440	320553696	507271168	0	28176132	0	0	0	337427968	0	275883456	0	221066960	200939584	169003568	79806400	201038400	0	0	109929496	584454464	441751936	24688754	685782464	343036096	502874976	578007872	880231616	455900736	647104896	653226432	383314528	1	1	1	54194	0	20581	E9PKF3	E9PKF3		ACAT1
2294102528	2697157120	2033737984	2406432000	1454097920	2638998272	2380581632	2683445504	1770180352	1488759808	1439589632	2077801600	273348736	2808084736	2950502400	2420272384	2684154880	2869622272	2943744512	2544279040	190914976	213531408	2421406976	2377255168	6433006080	700785472	7295002624	7714942464	5712291840	5469127168	4893118976	5761115136	5442074112	5535828992	4968306688	5222169600	14	14	14	45199	0	32331	P24752;H0YEL7;E9PRQ6;P24752-2	P24752	Acetyl-CoA acetyltransferase, mitochondrial	ACAT1
7839975424	8451763712	1028465472	7702130688	7467476992	6974165504	6888831488	7872397824	624446656	6130550784	6893451264	5536028160	9114898432	8215707136	8020612096	9114190848	9021817856	6714880512	8390190080	8927106048	6174937600	5558085120	8368774656	8965193728	4273549312	4798967296	4255116288	4498627072	571081280	5854516224	3995477760	4164035840	570634752	5244417024	5324243456	5268670976	17	17	17	4135	0	32331	Q9BWD1;Q9BWD1-2	Q9BWD1;Q9BWD1-2	Acetyl-CoA acetyltransferase, cytosolic	ACAT2
132955088	120995096	1316947584	1017755840	1703352576	1554859520	2217856256	1245191296	1432652416	170130384	1533251840	1805566848	1380786432	1574116096	1514618880	1433375360	1583844992	1965296512	1441933312	1558079488	1625882496	1886408832	2372694784	2373278976	1095102336	1474034048	116437312	1482072832	1334013824	1605222528	137326736	1619318784	1547428480	1544120576	1287917568	1579458944	14	14	14	60593	0	32331	Q9H3P7	Q9H3P7	Golgi resident protein GCP60	ACBD3
22939476	192411488	446663552	1933408	208789008	312587968	418082368	274871680	218708368	384921824	315338112	271086944	437133888	246604272	326985632	332078272	318299072	329264768	233564912	357036704	357903648	281259168	202853648	250345296	50062664	376427424	395987552	431368864	319991744	310574016	452896064	37645716	372680480	412117120	416865184	443847840	6	6	6	54785	0	13157	Q5T8D3-2;Q5T8D3;Q5T8D3-3;B7Z2R7;Q5T8D3-4;X6RDD7;Q5T8E0;A0A087X0B8	Q5T8D3-2;Q5T8D3;Q5T8D3-3;B7Z2R7;Q5T8D3-4;X6RDD7;Q5T8E0	Acyl-CoA-binding domain-containing protein 5	ACBD5
62461976	55857140	54859224	56043612	0	5922236	0	60722400	82057136	0	7572092	73800448	87916680	41623676	47250200	0	73539088	70909064	47539584	43462456	98331328	106390704	94240120	50239328	5377448	105527832	30756348	187810208	176497280	81566400	67062292	154295056	30236158	250008752	29569508	195434352	7	7	7	3115	0	12541	Q9BR61	Q9BR61	Acyl-CoA-binding domain-containing protein 6	ACBD6
66289088	62337372	0	57567512	151720688	79366824	235431792	75252864	87999848	213343280	66822068	122470144	8155829	76904792	0	6146139	0	108627800	0	0	157578240	146006416	7583958	26925608	0	0	6758309	0	5912875	63223296	76016952	0	72127344	66583508	0	72575336	3	3	3	57733	43554	38082	Q96AP0;R4GNJ5;A0A0C4DGT6;Q96AP0-2	Q96AP0;R4GNJ5;A0A0C4DGT6;Q96AP0-2	Adrenocortical dysplasia protein homolog	ACD
0	0	0	0	0	0	0	0	0	0	0	0	0	0	0	0	0	0	0	0	0	0	14150689	0	11326039	0	0	0	19895588	22776016	17621964	13316962	21328894	18839256	0	23151028	47	1	1	14736	1	-2	E7EQT4	E7EQT4		ACIN1
1507015424	1541360768	1123302016	1462288256	1387462784	144178640	1356393088	1432051456	140850672	1378707584	1557606272	1287200896	1476932736	1624025856	1658003840	1621681536	1509753728	1531644544	1436847616	1369465856	1232673920	1670045056	1885783808	1988740352	191839488	1999299840	1952111360	1912194176	2054831872	2164097280	175208160	2047970688	1987452800	2248957696	198084816	1880603008	47	47	1	14544	0	32331	S4R3H4;Q9UKV3;Q9UKV3-5;Q9UKV3-3;Q9UKV3-2;G3V3B0;G3V3T3;A0A087WYN3	S4R3H4;Q9UKV3;Q9UKV3-5	Apoptotic chromatin condensation inducer in the nucleus	ACIN1
7502804992	842906560	1040323008	8872380416	7874752512	8072220672	9337203712	8611214336	6763152384	7898514432	6870758912	7056846848	7949055488	7985435136	8830755840	8271288320	1014494784	9006886912	9233278976	9817123840	8189868544	8613892096	9137732608	8855684096	6596670464	7494943744	7095901184	7960753664	6326543360	7295480320	670624448	7345239552	6571099136	5897953280	5830689792	6140942848	59	59	58	12084	0	32331	P53396;P53396-2;P53396-3;K7ESG8;K7EIE7	P53396;P53396-2;P53396-3	ATP-citrate synthase	ACLY
820738432	715382400	65688552	750444672	564325760	584003712	629452224	70206912	430055712	539631552	494480032	454338368	786218560	673026240	773037120	718925696	789300864	819493696	773466880	768894336	442205280	523522528	460602752	471631616	654226368	758945792	527973728	6817419	356313248	39532544	47870284	355942080	227628896	370531712	320288160	28312628	24	24	24	98398	0	22843	P21399	P21399	Cytoplasmic aconitate hydratase	ACO1
7819046912	7953064960	7406986240	8076849152	6120848896	7638222848	8528261632	8431527424	6745355776	6515063296	6678956032	7469322752	7773121024	6872064512	8029701632	7496189440	7860222464	8344722944	7676413440	7844394496	6048939008	6695734272	7688318976	6994071552	1085628288	1136881792	1127585408	1123598720	1093554816	1045617408	1013324288	9266788352	9776657408	9104006144	8720429056	9196383232	35	35	35	85424	0	32331	Q99798;A2A274	Q99798;A2A274	Aconitate hydratase, mitochondrial	ACO2
868849600	843049472	1056321920	1090729856	814268160	87538672	756298240	909814208	800593408	977507008	735748800	94805096	938620928	935972736	976316032	1051842176	761275072	657008704	778531008	714166976	651003648	784260736	1109471104	708135360	637151104	562402432	496813824	755571136	457928800	493459072	408771744	548501184	6210158	731403904	843795904	662270656	11	11	11	46277	0	10713	Q86TX2;A0A087X0W7;P49753;G3V4F2;A0A087WT95;P49753-2	Q86TX2;A0A087X0W7;P49753;G3V4F2;A0A087WT95	Acyl-coenzyme A thioesterase 1;Acyl-coenzyme A thioesterase 2, mitochondrial	ACOT1;ACOT2
521969440	5596333568	505975360	4500160000	433192224	4735321600	4037538816	4617523712	3606800384	4379049984	4009495808	5192462848	5590656512	4423887872	5152061440	5912160768	6760691712	6373560320	6778594304	7568078848	4678900224	4116865536	6492793856	6131422720	3403865600	4991895040	5221841920	5343583232	5745864704	3428514304	4606214656	4378852864	4725113856	3311607296	2121581568	3524759296	8	8	8	1496	0	31805	Q9NPJ3;Q9NPJ3-2	Q9NPJ3;Q9NPJ3-2	Acyl-coenzyme A thioesterase 13;Acyl-coenzyme A thioesterase 13, N-terminally processed	ACOT13
525836128	5773529600	5383631360	6043908608	6219409920	5588943872	6466102784	5839940096	650565312	6975106560	6442366464	6307490816	5213660160	5859492352	6531125760	5598564352	7168721408	7252713472	7489964544	6244063232	6776882176	7913730048	8179258880	6963526144	5231711232	5714188800	5776258048	5835810304	5258930176	5870772736	5758905856	5667799040	5203053056	5818408448	5814963200	5615754240	14	14	14	41796	0	27511	O00154;O00154-6;O00154-4;O00154-7;O00154-5;K7EKP8;O00154-2;O00154-3;Q6ZUV0	O00154;O00154-6;O00154-4;O00154-7;O00154-5;K7EKP8;O00154-2;O00154-3	Cytosolic acyl coenzyme A thioester hydrolase	ACOT7
313778976	257274992	315785856	266053280	39085336	365522560	481691680	35779268	17976638	153723904	147263776	133993616	297829024	231974752	211426256	240351456	292069088	285529280	270536896	192326400	17906420	1860328	159342064	148339776	210153712	20113344	215903856	128774768	217714304	19560424	18926520	198658544	17509548	159162320	127516224	147289072	5	5	5	35914	0	10638	O14734;H7C5A7;E9PJN0;E9PRD4;H0Y698;Q9BR14;E9PMC4;E9PIS4	O14734;H7C5A7;E9PJN0;E9PRD4	Acyl-coenzyme A thioesterase 8	ACOT8
559952128	441997440	56114656	428287552	504208096	472382944	771571072	495541312	461850176	499074528	530745472	537345984	635051776	625242304	781792448	695721024	757199040	724667008	573509824	850254528	622875712	623488640	659767872	743587712	59409424	560462720	591205504	593745152	631116352	511771104	550507968	473868416	655914048	543121600	52652712	598232256	11	11	11	49901	0	69464	Q9Y305;Q9Y305-2;Q9Y305-4;Q9Y305-3;H7C5Q2;C9J7L8	Q9Y305;Q9Y305-2;Q9Y305-4;Q9Y305-3;H7C5Q2;C9J7L8	Acyl-coenzyme A thioesterase 9, mitochondrial	ACOT9
220662112	219715936	239536656	22895160	196194768	207542432	228680736	222919264	1588827	152036384	219430352	7719523	25116936	25206586	255965872	226282368	240957184	203965584	452651488	272231552	35478848	2505065	220535840	349858208	290601376	192121376	142845936	316518752	130282080	280652064	47701328	384107648	332943008	80962264	277416096	258583648	11	11	11	74423	0	86573	Q15067;Q15067-2;Q15067-3;K7ENF1;K7ESC7;K7ELT1;I3L0T4;I3L2U4	Q15067;Q15067-2;Q15067-3	Peroxisomal acyl-coenzyme A oxidase 1	ACOX1
269474496	286985184	362539744	362547296	306523424	349129760	366621536	44163392	377322016	427905888	453797504	460394208	380626048	444882528	328503616	488301440	369890080	366190272	29665586	360081984	475009152	409642240	449444096	593700800	76538200	26777180	8715621	95240512	11586767	21918376	86705776	81538264	113635696	59338776	89776840	77496792	14	14	14	77628	0	12273	O15254;O15254-2;D6RJ89	O15254;O15254-2	Peroxisomal acyl-coenzyme A oxidase 3	ACOX3
7012470784	6165985280	9013220352	7307822592	9140742144	7294213120	7872388608	715620160	8421479936	9607134208	948187520	1019187904	8904682496	9532500992	750098240	8428934656	725025472	9838740480	7019342336	6286332928	9691320320	9265475584	8499143680	609041408	6611604992	6618958336	6475909632	7000105472	7728009216	739019584	8438667264	7544196096	7923082240	7829753344	7046635008	8393494528	6	6	4	18042	0	24513	P24666;G5E9R5;P24666-4;F2Z2Q9	P24666;G5E9R5;P24666-4	Low molecular weight phosphotyrosine protein phosphatase	ACP1
102884248	103067920	89423320	8297807	56770276	108113600	65334136	46953936	0	46840184	52722484	61599188	5318923	115024528	112467688	12243728	62648824	7114215	143078560	64594704	104996256	57878428	107450912	60746744	90765488	67400848	8267972	71030768	41026728	51546604	0	0	0	0	112902584	0	3	1	1	17977	0	23553	P24666-2;D3YTI2;P24666-3	P24666-2;D3YTI2;P24666-3	Low molecular weight phosphotyrosine protein phosphatase	ACP1
0	0	0	0	0	0	15564604	0	0	14331771	0	12413013	0	0	0	0	9233668	13535006	0	0	0	11248294	0	0	22311494	2363518	0	21096788	16670714	17634760	21765140	165116	20629422	30587556	21889892	2706964	1	1	1	48854	2974	44352	Q9NPH0;V9GZ71;A0A087WYU6;A0A0A0MS36;X5D289;Q9NPH0-2	Q9NPH0;V9GZ71;A0A087WYU6;A0A0A0MS36;X5D289;Q9NPH0-2	Lysophosphatidic acid phosphatase type 6	ACP6
11311571	0	194042512	156505312	185287056	11028069	136238256	88478832	64390436	102422728	89790472	112049888	15011167	15739366	15664384	112766440	2110544	18187240	9777836	0	145214064	105556496	92679000	13330624	35709128	0	0	50365424	0	20945784	0	12386667	37061068	5366718	8397325	0	5	5	5	44566	0	12089	P15309;P15309-2;E9PFE6;P15309-3	P15309;P15309-2;E9PFE6;P15309-3	Prostatic acid phosphatase;PAPf39	ACPP
702027264	503770432	568589312	486246464	412528608	365712256	281000608	293816096	184182496	200809392	156112784	239480928	505236800	600309312	739869824	609651840	365806	521011872	439325184	44745736	271104448	247815584	295648032	297893248	199871024	211059152	21135256	133138840	160851184	98044752	171897008	135121120	43017740	89339144	17046784	33835456	9	9	9	68124	0	11784	Q96CM8;E9PF16;Q96CM8-3;Q96CM8-2;Q96CM8-4;D6RF87	Q96CM8;E9PF16;Q96CM8-3;Q96CM8-2;Q96CM8-4	Acyl-CoA synthetase family member 2, mitochondrial	ACSF2
0	65571184	0	0	92256656	0	0	0	31431324	0	0	0	62487444	0	0	0	0	0	0	0	0	0	0	0	0	0	0	0	0	0	0	0	0	0	0	0	7	1	1	12164	20607	26504	F5H3B2	F5H3B2		ACSF3
3808598016	3650667776	4337388032	3761172224	3035145216	2712852480	2259784704	2641745664	1643086848	2337476864	1953576832	2282883072	317122496	4363699712	3015318272	386840000	2533970176	3190060800	2421191680	2443444992	230241296	2126520704	2106203264	1783726464	2023580672	2076669952	2005052672	2290112256	2046447232	1994193024	2212436224	2039049344	1084802816	1145174528	1348657408	1278362112	21	21	14	64129	0	19884	Q4G176;F5H5A1;F5H755;F5H362;F5H2G6;H0YGC7;F5GX20;H0YH37	Q4G176;F5H5A1;F5H755;F5H362	Acyl-CoA synthetase family member 3, mitochondrial	ACSF3
1290161920	1093064576	1459860096	1209783424	1377412864	964976768	1390877184	976792192	880014720	1257919488	1191428992	1124431872	1191097216	1096852736	1305527040	1370316160	98882128	1305847936	1099824896	880224448	1179890688	1113699072	1248057216	1207816960	480513120	516578304	520118304	575177984	475029472	481065760	54711252	500953120	504786368	700986240	455516160	538019712	21	21	19	77942	0	65663	P33121;E7EPM6;P33121-3;P33121-2;B7Z3Z9;D6RER0;H0Y9U7;H0Y9Z9;D6RG07;Q9UKU0-7	P33121;E7EPM6;P33121-3;P33121-2;B7Z3Z9;D6RER0	Long-chain-fatty-acid--CoA ligase 1	ACSL1
171128880	177062576	1681971456	1876020736	1907438208	1802939520	2122713216	2120598912	1812822144	203563792	2101247872	2021288064	2360653824	1966472960	261655552	2425830912	2354388224	2318302208	2412522496	2477787648	2985753600	2979518208	3228914944	3263677952	1620521728	1569206144	1454000768	1710213888	128039856	1268021888	1045770816	1517301376	1426139136	1161312768	1079787904	1382121088	22	19	19	80419	0	15606	O95573;F5GWH2	O95573	Long-chain-fatty-acid--CoA ligase 3	ACSL3
1896327424	1956412672	1861979520	2359394560	1881259520	219391312	2219487488	1953503104	2027883008	2121600640	1726887808	2358120192	2258045952	261699360	2275908608	2147637248	2496876288	2603215360	214583792	2170978816	2933153024	2887450624	2782350080	2133564672	1683644800	2093828096	2320993536	2171054336	1598041856	2100257408	1508849024	185534656	1707192192	1478629120	1886685952	1965994240	24	24	21	79187	0	20361	O60488;O60488-2;D6RF95;D6RD96;D6RFW9;D6RDA8;H0Y9A0	O60488;O60488-2	Long-chain-fatty-acid--CoA ligase 4	ACSL4
40012496	37743388	22524844	23901878	62544444	20503632	53385264	36356388	69012944	96713760	10407634	108208344	70589104	87324592	64544844	59776720	93573064	114388120	92946648	78002336	10694185	152974336	144118320	111563344	26800774	20731342	26173918	64609028	53975932	64631152	14923658	88040264	17918886	45716328	127237456	41222520	8	7	6	7599	0	13623	Q9ULC5;Q9ULC5-3;Q9ULC5-4;C9J8C7	Q9ULC5;Q9ULC5-3;Q9ULC5-4	Long-chain-fatty-acid--CoA ligase 5	ACSL5
54109328	80262664	223953648	94922384	94497880	97911840	86550232	60372316	36551800	32746636	23168428	99639488	91495096	80148696	82882440	47090240	31639780	4991828	20446684	31033248	32545980	3678694	27507364	38696936	271288352	194522304	264527984	351108256	276276032	305947520	346758592	343616544	97730120	170552752	199358432	139404384	15	15	15	74856	0	13357	Q9NUB1;Q9NUB1-2;Q9NUB1-3;Q9NUB1-4;Q5TF43	Q9NUB1;Q9NUB1-2;Q9NUB1-3;Q9NUB1-4	Acetyl-coenzyme A synthetase 2-like, mitochondrial	ACSS1
17841820	7674441	33663516	12145295	27905912	23451744	33748312	6037261	9672934	10960875	10270383	0	4149282	32329132	9061791	10629496	17601256	25131902	0	313337	0	18373572	0	5476735	156535264	40409664	169462272	95793264	42332372	109981776	44624388	96327240	18951178	59958420	125482600	10720048	8	8	8	78579	0	12086	Q9NR19;Q9NR19-2;F8WCJ4;C9IYL0;B4DEH9;C9JY31;C9JXD9;F8WDJ9;C9J7L5	Q9NR19;Q9NR19-2	Acetyl-coenzyme A synthetase, cytoplasmic	ACSS2
5104103424	4906338304	4763739648	6147116032	5283616768	2879016448	1092541056	6580024832	3237253120	2768109568	12972085	1507574656	2827516672	2889211904	4155400448	4029462528	2883757312	2793823744	3065484032	2724428800	3069590784	425433376	1655722624	2401743872	2244294400	633142720	775199808	1630971904	1584017920	1952719872	1526378496	1546944000	153665152	1879242752	2069236352	2314354432	15	2	2	11394	16289	7483	C9JZR7	C9JZR7		ACTB
39250836	0	0	0	0	49003196	2898138	17660380	204835408	0	19093648	0	0	0	0	9051505	19204708	0	0	6892548	35002616	0	0	48786568	0	0	0	0	0	0	0	0	0	0	0	0	38	1	0	41736	44027	40875	P60709;G5E9R0;C9JUM1;C9JTX5;F8WCH0	P60709	Actin, cytoplasmic 1;Actin, cytoplasmic 1, N-terminally processed	ACTB
3533544448	78640112	3059684096	0	5724243	0	69170608	63896476	58031496	46335120	2282802432	73693776	168385360	0	0	3513995264	0	0	110182872	91682264	0	3359102464	0	194317600	1501811328	73752760	99390344	85801872	1911170944	1720818688	0	1628514944	1481942400	1805163008	1398884736	1467680896	12	2	2	42003	0	17927	Q562R1	Q562R1	Beta-actin-like protein 2	ACTBL2
751011840	6851359232	6241958912	7263635456	5071824384	5714383872	4958288384	5944324608	5445649408	5305256960	5353369088	521308064	5863709696	622315328	6494818816	60029996	5876157952	6069846528	5859655168	5197360640	628065408	5574633472	4877705728	6840290304	3117709056	3207936512	3202909696	2917699328	3415712000	3013407744	2653662976	2423350784	2628946176	2685108224	2581948160	3048535296	27	6	6	42019	0	17708	P68032;P68133;P62736;P63267;A6NL76;P63267-2;C9JFL5;F6UVQ4;F6QUT6;F8WB63;B8ZZJ2	P68032;P68133;P62736;P63267;A6NL76;P63267-2	Actin, alpha cardiac muscle 1;Actin, alpha skeletal muscle;Actin, aortic smooth muscle;Actin, gamma-enteric smooth muscle	ACTC1;ACTA1;ACTA2;ACTG2
0	31101148	0	62310748	0	0	0	0	0	47204516	0	0	72866624	0	0	0	20056638	0	0	0	0	0	0	0	0	0	0	0	0	0	0	0	0	0	0	0	17	1	0	18031	1	-2	I3L3R2	I3L3R2		ACTG1
0	25605412	66655348	28763274	0	75984344	78287992	0	76824864	67144312	51536096	0	0	0	0	69825904	12289765	0	0	0	50190416	61653872	80249432	49685504	65287544	35179180	54573072	0	0	0	62883348	0	0	0	0	0	19	1	1	26934	1	-2	I3L4N8	I3L4N8		ACTG1
1091106944	1124580608	1529668352	721206656	64811720	102876000	74026456	505190080	516681920	591798400	569752256	665802304	1801593728	1298353408	1215191040	1869971200	1248479744	1193311232	1007851136	1040544960	140356784	159780800	1000244160	44902136	286445472	182917296	546073408	387427456	477192288	169359360	368941344	169950000	174613264	214196224	261732384	596094848	17	2	2	14522	0	24844	K7EM38	K7EM38		ACTG1
839874176	8980632576	8153154048	7409581568	6675520000	7224233472	6170911232	6924086272	7345394176	6891290624	6456039936	6771174400	7147421696	8171897344	7516195840	8294835200	69869216	7124561920	7012670464	7186579968	8410416640	7199363584	621459776	8103715840	5278937088	5208302080	5081862144	4799028224	5431630336	5155664384	5357100032	5347601920	4518178816	5379243520	4956518912	5054686720	38	38	0	41792	0	32331	P63261;I3L3I0;I3L1U9;J3KT65	P63261;I3L3I0;I3L1U9	Actin, cytoplasmic 2;Actin, cytoplasmic 2, N-terminally processed	ACTG1
2991165696	2851641344	2949275136	3097477632	2875377664	3122767360	2649037312	2816533248	2522524416	2566126336	2331862272	2514936832	3923581952	2763429632	2505926656	3005194496	5002657792	3196059136	2889485312	3143913728	2084813056	2240205312	2432098816	458786528	7179451392	8138364928	6404584960	8395227648	5602902016	6298795008	9367070720	4752175616	5536463360	7269492736	9676642304	5771058688	10	10	10	4746	0	32331	O96019;O96019-2;H7C5S0;O94805;C9JQT2	O96019;O96019-2	Actin-like protein 6A	ACTL6A
0	7161787	8920187	1276203	476391	0	0	0	0	0	0	0	2413125	3236195	5091738	4625647	0	0	2541345	3249113	0	0	0	0	8885302	46426	9115316	89074	4582363	5309677	0	5912341	4922434	7573846	5270603	7518303	31	1	1	94825	1	-2	H9KV75;G3V2W4;G3V2X9;G3V2E8	H9KV75		ACTN1
707311168	732140800	943270080	958836928	1063123328	846331968	9593878	625275328	908985472	1104622592	1134459904	996592576	974429568	1139761664	1084983936	1019155904	876011328	1323927808	1101177728	907664896	1173885440	1387837824	1270127744	904175168	193986992	185476000	251975552	114802728	161656064	258274240	159221968	269466912	183183824	111626752	179457104	22187436	34	22	2	10306	0	32331	P12814;P12814-3;P12814-2;P12814-4;G3V2N5;H7C5W8;H0YJ11;H0YJW3;G3V5M4;G3V380	P12814;P12814-3;P12814-2;P12814-4	Alpha-actinin-1	ACTN1
0	0	0	0	0	0	2070493	0	0	2889615	0	0	4229727	0	831617	1005599	0	3527321	0	0	2313675	0	0	1172267	0	0	0	0	0	0	0	0	0	0	0	0	12	1	1	10385	1	-2	P35609;P35609-2;F6THM6	P35609;P35609-2;F6THM6	Alpha-actinin-2	ACTN2
104662608	106141600	164369136	141687872	227703664	124348816	22550156	105628616	202437136	206016960	226621760	204741776	76116896	13693263	56688544	96550976	68045576	160079728	83067704	10369196	24457634	22285576	93204328	0	651481728	635297088	53218236	664501248	628595520	680019072	618673728	68956632	0	713095424	595493632	1005139392	8	1	1	10324	1	-2	Q08043;A0A087WSZ2	Q08043;A0A087WSZ2	Alpha-actinin-3	ACTN3
0	13416507	21431658	13594596	0	0	9888969	15603384	0	21950998	20452348	14827983	0	15544465	15710534	1197992	13647834	13670939	10909625	0	0	126749	6460278	7875391	38615860	23859336	26096344	36148016	31916836	3795949	46132584	60721592	25541702	28204852	2933293	19182692	23	1	1	39001	68608	17332	H7C144	H7C144		ACTN4
120903480	0	109347136	0	0	82746120	81124640	95376696	89932680	82948208	76008816	207547920	0	60251676	57652932	0	0	8808809	75305392	0	64112092	52449616	80690104	62664756	0	0	0	0	0	259935328	0	0	0	0	0	0	12	1	1	2143	15684	60885	K7EJH8	K7EJH8		ACTN4
2598499072	3049656064	3188423168	3000872448	2443082240	2904147456	2842624000	3104236288	2667912704	257008640	254534656	2475849216	3138489600	2878996736	2844584960	3279619584	2758000384	2801164544	320159392	2967565568	2324173824	2417076736	2330662912	2167608320	1912048000	1822034304	1938944000	1899193216	1790779648	1707665024	1675406592	1716542720	1791605632	1581706496	1534457856	1607534976	56	56	13	10485	0	32331	O43707;O43707-2;F5GXS2;O43707-3;K7EP19;D6RH00	O43707;O43707-2;F5GXS2;O43707-3	Alpha-actinin-4	ACTN4
120139768	195100064	174968000	164362288	271708928	194542624	21618444	227992128	168125632	225220480	255956000	204118512	202873072	131889872	182076048	243749024	286699136	219729152	307969504	27743984	184136528	206288304	246861184	205818320	302996576	291548480	258363696	265111536	10262537	213289552	213331168	362459648	106477728	67207784	232569456	7115145	7	7	7	46306	0	2529	Q9NZ32;V9GYX7;G3V2Q5;G3V5Y4;F6S9Y6;G3V524;G3V4K6;H0YJD9	Q9NZ32;V9GYX7;G3V2Q5;G3V5Y4;F6S9Y6	Actin-related protein 10	ACTR10
3991234816	5111455232	431467840	5071942656	496764064	5206338560	516461536	5640781824	554116160	490668768	5098076160	5210937344	5670977024	5435220992	5912513024	5264567296	5587625472	5415667712	524447552	5482392064	4334429696	4651293696	5135953408	554642496	2345246208	3223563520	377322752	2874702592	275793600	2974164736	251571440	3046509824	2619805952	2400299264	25739694	2625075200	15	15	11	42613	0	30979	P61163;R4GMT0	P61163;R4GMT0	Alpha-centractin	ACTR1A
454613760	416136128	366060800	475131520	369757920	471052864	426333376	450841696	222807840	304514208	246365984	436692384	576497536	497415360	525608160	496642592	551428480	488285120	446215520	611323200	391406848	442976128	402312448	189370864	375136896	461791360	333819520	334545504	308904864	391825600	373836736	354754240	230115408	280842272	244031920	250458384	10	6	6	42293	0	62896	P42025	P42025	Beta-centractin	ACTR1B
8160336384	8852269056	9547433984	9733739520	1073676544	1011599040	806863360	9839154176	7374834176	7765517312	8250864640	8320790528	1072873408	9306169344	8800935936	8545109504	1328529152	1015683776	1260656384	111698560	857600640	9023919104	1132786432	9877738496	761242304	8249511424	7809927168	8312383488	8800204800	8110496768	7393885184	7196238848	8301226496	7176180736	9530755072	8060280320	16	16	16	4476	0	32331	P61160;P61160-2;F5H6T1	P61160;P61160-2;F5H6T1	Actin-related protein 2	ACTR2
2093579520	1923206912	2350354944	2215834624	2366705920	202450064	1767079296	2020588032	2069372288	1749012736	1725803	1439838592	185911952	2352269056	2024856064	2218254592	1687646592	2116070144	2116371328	1841800704	228410208	1917336704	1775816192	1590825600	1290605056	1314881152	1168118016	1287569664	148524656	1317945216	1312756736	1345559936	132510920	1263706240	1335047808	1273163520	20	20	16	47371	0	32331	P61158;B4DXW1;F8WDR7;Q9C0K3;A0A0A0MTI9;H7C4J1;C9IZN3	P61158;B4DXW1	Actin-related protein 3	ACTR3
0	0	0	0	0	0	0	13879949	26260052	0	16777920	0	18656282	18349392	0	22925528	0	0	21663500	0	0	14970817	0	0	43127144	49142168	37044096	43909728	5102706	45708332	40142280	45084472	3127494	32798134	0	59181060	5	1	1	47607	0	921	Q9P1U1;Q9P1U1-2;Q9P1U1-3	Q9P1U1;Q9P1U1-2;Q9P1U1-3	Actin-related protein 3B	ACTR3B
95476448	82935888	55457744	92701664	84239552	106290752	69466072	93827032	97943984	44976640	102990400	178485408	104766064	114409664	98415168	124760536	72602720	113435608	63868936	69680640	55984252	110761648	44107064	64937748	8550699	99599568	101621352	98404032	93324552	108416144	131315648	150290256	79000800	117087792	116500744	102066520	8	8	8	68297	0	11842	Q9H9F9	Q9H9F9	Actin-related protein 5	ACTR5
53132940	27786602	2853937	23151152	28405176	95489424	132937600	112384104	81771880	73411920	112168112	86272672	85876512	92384160	56520376	43507328	70224248	89099584	48082736	65289960	36929520	56087008	63394148	56169556	100044944	92106048	29374354	178416368	50961748	64417400	85719888	89145848	107132048	129725968	128574296	10673223	7	7	7	4581	0	33413	Q9GZN1;F8W057;F8VRL1;G3V1Y1;F8VP72;F8W043;F8W0Q1;F8VSD1;Q9GZN1-2	Q9GZN1;F8W057;F8VRL1;G3V1Y1	Actin-related protein 6	ACTR6
48652464	83988752	83801656	62796416	96917424	48333444	48177664	84762200	101496200	79491008	58213208	108369744	102506488	62278128	6861339	70883912	33995984	50200604	85478464	45312252	100546888	40643552	44400760	67821256	84897864	63991504	3335596	71552264	857726	49664452	10104783	55032012	128010304	89647192	90574160	858123	5	5	5	70483	85555	33805	Q9H981;H0Y849;Q9H981-2;Q9H981-3	Q9H981;H0Y849;Q9H981-2;Q9H981-3	Actin-related protein 8	ACTR8
63644500	602330816	603711936	739862144	47927656	515997408	445785824	637002752	575003072	648212352	507380576	592639168	628260928	662022336	766618816	740039744	463812448	583283392	489405504	536889152	539174400	446282784	252553024	105459976	619585920	597512768	650535616	63079392	586248832	386511648	618659328	691777152	734336576	460801440	762688320	415590880	8	8	8	45884	0	63507	Q03154;Q03154-3;Q03154-4;C9JMV9;Q03154-2;C9JYZ0;F8WC59	Q03154;Q03154-3;Q03154-4;C9JMV9;Q03154-2;C9JYZ0	Aminoacylase-1	ACY1;ABHD14A-ACY1
127506760	189851568	140063008	163219904	53248456	48952588	150422496	3452028	0	86095912	118760600	92994536	115503384	202793312	135881424	227770496	15244471	4077697	6594229	47516388	206870960	105013672	384387456	117135600	40510148	35086200	65959212	60292072	31193276	26582800	62465368	51341932	0	43608416	59663648	54713296	7	7	7	35241	0	25766	Q96HD9;E9PRA7	Q96HD9	N-acyl-aromatic-L-amino acid amidohydrolase (carboxylate-forming)	ACY3
7285108224	6632440320	8374610944	7160940544	8956353536	7525900800	6384345088	7303264768	5246565376	5208752128	512555872	5706676224	688051072	5383622144	5545523200	6154128896	4972833792	7386906112	5524643328	5355386368	5482669568	4047259904	3554531840	4127119104	7611539968	6639311872	7427514880	6240180736	6140661760	6819215872	6360786432	7002420224	3655011328	4764459520	599498240	5848716288	9	9	9	11261	0	66427	P07311;G3V2U7;G3V3F8;G3V597;P07311-2	P07311;G3V2U7	Acylphosphatase-1;Acylphosphatase	ACYP1
1236268416	1679878528	974047104	1619158656	1449191552	1486974336	1207074432	114153336	562557184	143921920	1148351360	923579712	1220828416	67170992	705552064	887609664	182729744	778694016	1098585728	63136880	747775872	844331392	1194089472	1309459328	3762418432	4217816320	2433270784	3135617792	3843297792	4018222592	3585436672	2923323392	270898880	2994683648	3037278720	2562459648	6	6	6	11139	0	20459	P14621;U3KQL2;U3KPX1;U3KPX8;E9PF46;F8WA34	P14621;U3KQL2;U3KPX1;U3KPX8;E9PF46;F8WA34	Acylphosphatase-2;Acylphosphatase	ACYP2
6464235008	6091672064	7507862016	629261696	7604647424	7048996864	6483457024	7251437056	4467161088	568699200	457403040	5707354624	7515591168	7921511424	7296492544	940179520	9371552768	1208852992	1045472832	9689363456	6437451776	6203271168	79886608	6784936448	152945088	405123712	147472400	137004608	201158112	181366352	112605840	203319904	57265384	135951584	3566249	59335852	24	24	24	40764	0	32331	P00813;F5GWI4;F5GXW0;F5GYD4	P00813;F5GWI4;F5GXW0	Adenosine deaminase	ADA
642966208	579779392	637756032	537580864	623928576	470355680	258997504	237131168	375184768	635074304	4409535	654847680	398960160	524044480	415529056	333120128	356521600	510333408	383052416	402283520	424533920	446413664	450070400	359051808	410736096	687427008	711505728	705435584	481021376	690650112	847511744	942867008	490489280	759155264	815465600	649665536	16	16	16	84141	0	63886	O14672;O14672-2;C9J9B4;H3BS53;H0YK87;H0YNC5	O14672	Disintegrin and metalloproteinase domain-containing protein 10	ADAM10
7545117	110444128	173610080	134902480	58967660	47535092	27199256	46949200	46208092	122018560	75365504	89516160	41628980	92535680	57758024	72869272	6648531	51354824	40667440	43723520	75464632	1690459	63486336	0	39407084	30946096	42099368	3012156	20360652	27605496	13507977	12839318	17947792	15495288	6031258	10620411	4	4	4	9302	44418	43157	P78536;P78536-2;E7EUI5;A6H8L4	P78536;P78536-2;E7EUI5	Disintegrin and metalloproteinase domain-containing protein 17	ADAM17
38443164	0	32253406	22112636	43884408	54553200	40835552	12218627	9595567	58644024	50921948	24896104	57657036	33839588	52136740	20064900	6653801	58295592	69319504	66133368	38038352	48847212	28215314	46978864	1366034	6975848	36542320	9791171	0	0	0	10757615	5744595	0	0	0	3	3	3	8877	16622	8377	P78325;P78325-2;P78325-3	P78325;P78325-2	Disintegrin and metalloproteinase domain-containing protein 8	ADAM8
23707884	37134640	29328476	49068212	57645908	44022376	52198084	38557468	5077308	37527592	35609832	57453908	0	0	0	0	0	0	0	0	7627254	0	0	0	1804289	0	0	0	0	0	0	0	0	0	0	0	2	2	2	13475	1	-2	O95450	O95450	A disintegrin and metalloproteinase with thrombospondin motifs 2	ADAMTS2
2394222336	2371748352	2907618304	244605296	3036028672	2516538880	2742210304	2394848000	3118896640	2995148800	3015354880	2900837120	3189017344	3131531264	2737858560	2933814784	2615498752	2947158784	3023045632	3114919680	3489984256	2944644352	3160217344	2772877568	2146652416	2071923456	2322589440	1886528128	1958515712	1851728128	2059077120	2318481152	2011053824	1994635776	2256305664	2360128000	29	29	29	13606	0	32331	P55265;P55265-4;H0YCK3;P55265-5;P55265-2;P55265-3	P55265;P55265-4;H0YCK3;P55265-5;P55265-2;P55265-3	Double-stranded RNA-specific adenosine deaminase	ADAR
0	0	10578671	0	0	0	0	0	0	0	0	0	0	0	0	0	0	599391	3251585	0	0	0	0	0	34531624	4074048	33477040	49557792	23043892	47637600	30310132	49485220	21454634	1460822	18500578	69050664	4	4	4	80762	0	19177	P78563;P78563-5;P78563-3;P78563-6;P78563-2;P78563-4	P78563;P78563-5;P78563-3;P78563-6;P78563-2;P78563-4	Double-stranded RNA-specific editase 1	ADARB1
9217796	11282873	10810125	10241233	11216928	13658254	77480272	59063600	18045608	37821696	15368373	19294754	90203736	3141425	25968896	26646148	6599024	39777324	4887663	17295936	13246282	11779635	0	15183275	2311755	16464362	15424718	8706309	21286180	83521104	19830856	11245863	14711656	11526343	12018731	12778235	3	3	3	55392	99249	15318	Q9BUB4;Q9BUB4-2	Q9BUB4;Q9BUB4-2	tRNA-specific adenosine deaminase 1	ADAT1
183549728	93615728	123082144	100849536	111164704	183614576	101768912	172466	174547488	238046832	205078064	166299824	104410864	208541600	76626776	53796224	106807736	97848360	150128144	10520979	262735696	17504364	98280408	112763424	272164128	117694840	143804304	160553552	217632832	235601584	258966416	106046648	253626688	354070368	385125408	409080256	4	4	4	3807	29828	45305	Q96EY9;D6W601	Q96EY9;D6W601	Probable inactive tRNA-specific adenosine deaminase-like protein 3	ADAT3
8070814	0	21310248	1434649	24387816	20436288	21501340	13086571	18093276	22786784	0	0	0	17529324	0	14205635	0	31507604	80387	0	0	17878796	0	14214051	5930821	0	10781768	0	6875985	0	0	0	7631416	12700874	0	0	1	1	1	60577	38431	20655	Q86TW2;Q86TW2-2;Q86TW2-3	Q86TW2;Q86TW2-2;Q86TW2-3	Uncharacterized aarF domain-containing protein kinase 1	ADCK1
9010398	69688344	122611888	80565224	66770236	5989122	100447008	52648104	47429880	57733416	65000176	84710464	108966328	81136040	105106080	86195520	100530304	83694576	63567280	79060360	58813144	54746200	48749660	50293392	301038560	24950768	257204256	377517696	287034400	173518944	215929104	286452864	169476592	211065968	184000704	227708032	8	8	8	71949	0	41068	Q8NI60;Q8NI60-3;Q8NI60-4;Q8NI60-2	Q8NI60;Q8NI60-3;Q8NI60-4	Atypical kinase ADCK3, mitochondrial	ADCK3
409369696	348774144	419250848	541898240	516274368	528622976	405379008	454257632	362502784	31318828	275737504	395439904	400734688	503652544	390395488	448567136	510166656	553850240	417920352	480985952	504382432	497919008	418823712	359126592	195018416	268435072	191033440	244518544	2655771	34810000	330495328	37410528	17328092	248645776	245193600	270543648	9	9	9	60069	0	18426	Q96D53;Q96D53-2;M0R001;M0R011;M0R362;M0QZZ2;M0R3F7	Q96D53;Q96D53-2;M0R001	AarF domain-containing protein kinase 4	ADCK4
84340544	58017648	164935120	98115296	19737076	102907808	112530560	79275216	10719037	117222048	93833392	165679616	150991648	118879000	12090982	14276526	83513208	76507680	114769448	115229408	187531600	13295762	124403256	80923008	53409880	75631344	79216352	73793136	75571272	58001280	81285080	64003100	72325288	56749720	91863712	81318480	5	5	5	65896	19281	26979	Q3MIX3;E9PLF3;E9PJ20	Q3MIX3	Uncharacterized aarF domain-containing protein kinase 5	ADCK5
791592960	641892288	728471104	615805760	732255360	680393344	9237575	587212736	398668448	540562880	422510368	626702016	729440064	760533952	740995328	361259200	721134912	851230208	685188288	453468736	590566592	572707712	529244320	476201280	490174336	472715648	418704544	47656608	510156864	381721056	515566976	436145248	369298528	37631824	371587840	4536846	12	11	10	80954	0	17551	P35611;P35611-3;P35611-2;H0Y9H2;E7EV99;E7ENY0;P35611-6;P35611-4;A0A0A0MSR2;P35611-5;H0YG19;H0YFD8;D6RF25	P35611;P35611-3;P35611-2;H0Y9H2;E7EV99;E7ENY0;P35611-6;P35611-4	Alpha-adducin	ADD1
0	4589647	4486966	7591771	0	7844268	6991314	0	54258648	32394482	0	82024280	74960568	41856048	71056336	55837504	42016688	40650328	50520492	42638152	23355514	35060456	56292568	31243900	89000616	0	61738852	59710456	48053800	54634272	17073866	32120516	64781788	42776604	54983140	0	12	10	6	80853	0	18429	P35612;P35612-4;P35612-3;P35612-2;P35612-8;P35612-9;C9JTM0;C9J080	P35612;P35612-4;P35612-3;P35612-2;P35612-8;P35612-9	Beta-adducin	ADD2
846683840	875789696	746411584	830197696	82134168	877025856	924213760	983645632	503916672	617474368	608555968	622436288	803096384	84590384	972859200	781429504	764445888	772665344	628799936	704747520	294753056	671021248	50169348	560675328	345108576	287099264	319528128	438801344	406586080	325392480	435236896	349538432	217211712	203359936	233527120	284160000	16	16	15	79154	0	84551	Q9UEY8;Q9UEY8-2;A0A087WX08	Q9UEY8;Q9UEY8-2;A0A087WX08	Gamma-adducin	ADD3
8178290176	8587735040	8985753600	8003065856	8004288512	7854896640	6463269888	8624131072	8219153920	9682970624	913308352	9718085632	7373565952	761808704	5868702720	7437308928	7465440768	6408026624	7482616832	741147392	4672278528	5810035200	7875611136	5615372288	9178394624	8716172288	8771357696	961285120	7258734080	8438118912	7350410752	7398235136	9689459712	9122045952	68534680	9001991168	14	14	14	39724	0	32331	P11766;H0YAG8;D6RAY0;D6R9G2;D6RFE4	P11766;H0YAG8	Alcohol dehydrogenase class-3	ADH5
1879312512	2401024256	246381472	229717216	2084657920	2405587968	2257197568	1845062656	1839804672	1719410816	169818704	145669280	1922614272	1904315520	1653506560	1834499072	1832679552	2214831104	2237755904	250509280	1495773696	1693998720	2013325952	1349835776	2784979968	3135042304	2637843456	3434267648	2268135680	2142296960	2050585344	2076250752	1806233344	2095837952	2315059968	2989267712	8	8	8	21498	0	16592	Q9BV57;Q9BV57-2;A0A0G2JQN5;H7C382	Q9BV57;Q9BV57-2	1,2-dihydroxy-3-keto-5-methylthiopentene dioxygenase	ADI1
1761348352	1355415296	1426510336	1491694336	1876078208	972865472	1968200960	1953129088	1827192448	1711772416	190670064	1859701376	1109503744	1255692544	1621395840	1419747968	2029044352	1759574272	192177888	1818244736	974613952	1121154688	1318052864	874807296	216150096	1981523072	2093965568	1885552768	1082706688	136009600	1508250880	1369284992	2025614976	1472113536	1732171648	1723902080	11	11	2	40545	0	10622	P55263;P55263-3	P55263;P55263-3	Adenosine kinase	ADK
283128416	133752584	92099488	14649649	134417952	346301536	228731904	367150368	346650912	416886912	436716064	228677696	143321344	418007520	399229664	89781192	637207936	541254656	342408576	661314816	437217856	678836160	656363584	898760128	527814880	576666816	412684736	585874240	672951232	541523072	622276480	571188800	873013440	708976192	512287040	667058048	10	1	1	38703	0	4546	P55263-2;P55263-4	P55263-2;P55263-4	Adenosine kinase	ADK
2352646400	1813874048	3382179840	3175301120	3057463808	189289024	1477833472	194900784	2688506368	1736445056	1967387008	2572708352	173086016	1526442112	1317969152	1580591104	144615232	138085472	1092448896	1314569600	1172947456	1439869440	1515556736	1367356544	1857749120	1494139136	2349960960	1430476032	133586864	172567504	152347360	13502879	1467267712	1351069696	1625412480	1571269376	43	43	43	12356	0	30117	Q9H2P0;E9PQK8	Q9H2P0	Activity-dependent neuroprotector homeobox protein	ADNP
8834537	7788063	11121851	19536556	21618308	9183875	11948225	17120488	1647311	22919724	23662326	24719608	14963891	11300693	14333238	6322277	15291172	11508692	6686737	9743769	9188475	9063643	12649341	1137721	8559973	5768171	19993348	8229946	8344876	6931747	14539787	7769534	1876103	13882647	15317269	16961716	6	6	6	12283	43757	39263	Q6IQ32;H0YLN6;H0YM09	Q6IQ32	ADNP homeobox protein 2	ADNP2
634643200	591797440	491763680	479695392	532083168	508249248	648339072	102950216	503514048	797724032	653598144	754726592	68496632	769334016	583178304	617332800	686243968	568189760	739003648	748020224	319395520	565101632	59476172	575673472	1117728000	989838912	1087280896	957080512	1252671872	113557184	1207770368	723970432	903462336	990160576	1223098624	662452352	6	6	6	29751	0	20555	Q96SZ5	Q96SZ5	2-aminoethanethiol dioxygenase	ADO
426747616	425103072	468034976	40072576	491334880	503552960	528296640	488791936	393671584	727099904	645787776	751549248	500716832	665873280	486098752	562194176	692005440	607242688	588411520	689048832	612505728	577139712	67525680	619797696	633856128	66306176	684905280	749138368	96808096	787737024	791136192	835248448	613918784	658416512	609561280	340335584	7	7	7	54088	0	21561	Q9BRR6;Q9BRR6-2;Q9BRR6-4;Q9BRR6-3;H3BRS6;H3BU35;Q9BRR6-5;H3BTH4;H3BN66;Q9BRR6-6	Q9BRR6;Q9BRR6-2;Q9BRR6-4;Q9BRR6-3	ADP-dependent glucokinase	ADPGK
246690064	324509376	256067056	370632640	120610104	317551264	394693856	244076336	164426288	179266896	198571088	199295584	324841312	222112880	393623616	222282944	306619360	449270496	476234912	301284192	190477824	56740268	108652808	286289056	51738428	82733840	213328912	384269	90666232	121778616	76446720	34666012	79034624	131683512	57342080	51765524	7	7	7	39506	0	29134	P54922;C9JZW7	P54922;C9JZW7	[Protein ADP-ribosylarginine] hydrolase	ADPRH
1018955712	728384704	850188096	505693376	1041371392	1019784384	1496749952	1190696064	1068574784	1303078144	1151867136	1321719296	1380912768	1269976320	1505923968	1399811072	1365232512	941867264	792609536	1055359936	1059794304	1395813760	1166186752	1377596288	983028032	1102649472	734513856	1154856064	1061309056	583499584	1107921024	1300783360	102215936	954139200	1175431680	1010592512	8	8	8	38946	0	99867	Q9NX46	Q9NX46	Poly(ADP-ribose) glycohydrolase ARH3	ADPRHL2
76707208	0	0	94135416	86741760	65126776	31478148	0	0	104188424	0	105642000	45617184	0	0	77201936	31795708	0	0	0	8080474	0	65283816	0	131338624	121157064	0	0	0	0	0	0	0	0	0	81759664	1	1	1	34057	1	-2	V9GYR6;Q3LIE5-3;Q3LIE5	V9GYR6;Q3LIE5-3;Q3LIE5	Manganese-dependent ADP-ribose/CDP-alcohol diphosphatase	ADPRM
968217984	922821376	1036686720	978063424	1097536256	106987336	727696000	8539858	929235776	952061632	916181568	793903232	1177000064	905322944	1166961024	1208634368	986593280	875384320	1097386624	916717504	1200941056	877732864	90600800	816300288	1826799232	1872015616	2040909056	1766248192	1690577408	1336414208	1419225984	1382946432	139299632	1342607872	1194371968	1519046400	23	23	15	79573	0	32331	P25098;E9PRV7	P25098	Beta-adrenergic receptor kinase 1	ADRBK1
0	0	0	0	0	5942756	6625268	6874299	1808592	2727476	4375134	3789047	5682053	0	0	2520541	3816177	4837017	2811528	376179	2649697	0	3844445	0	0	0	7627143	0	3557191	1670298	0	1240049	0	1565402	0	0	9	1	1	79709	1	-2	P35626;Q8N433;H7C099	P35626	Beta-adrenergic receptor kinase 2	ADRBK2
13200222	1560815744	110941424	1294682624	143962112	1409888896	1699828096	1781273216	1780762624	2363420160	2423464192	1938434560	1226509952	1596390272	1299711872	1477217408	1908210432	2089862272	1876788608	2421239808	1427431936	2138835712	2802618112	2457901824	2356885504	2199508480	2339797248	2222513664	2709102592	1430250496	2247538176	247020832	2689183488	2725334528	2687011328	1840497920	9	9	9	42153	0	93174	Q16186;A0A087WX59;A0A087WUX6	Q16186;A0A087WX59	Proteasomal ubiquitin receptor ADRM1	ADRM1
923939968	120004112	1150496128	340556192	597762304	636706432	665783424	223741968	1135522304	1722421760	2379252480	722005760	583176384	778541312	501706688	884820224	402961440	53844448	284555520	1013976192	459258336	382267136	35164952	23086432	800053376	762356352	632315776	150413440	123317208	153423056	804108992	143632784	688768448	141668192	642564032	363522560	7	1	1	15278	1	-2	A0A096LPA2	A0A096LPA2		ADSL
2994716928	3162572288	3208468224	3260615680	3287140096	3431090176	3754279936	3302713856	3542362368	4341730816	4223753216	4512906240	2991440384	3353446400	3338573568	3269626624	3800841984	432116480	3413762560	3532591360	4159462144	3826318080	4798379008	3841504768	4002191104	4646726656	4423347712	5042740224	4672693760	4950602752	5728043008	5618402816	4953089536	5925117952	5564576256	4945439232	16	16	10	54889	0	2456	P30566;A0A0A6YY92;A0A096LNY6;P30566-2;A0A096LNY5;A0A096LP92;A0A096LNY4;B4DEP1;A0A096LP72;A0A096LNT4;V9GY96;A0A096LP76	P30566;A0A0A6YY92;A0A096LNY6;P30566-2;A0A096LNY5	Adenylosuccinate lyase	ADSL
894466560	1017233600	783648640	1076337536	1122532608	114017440	1220212864	1082386048	1463227520	114414320	1447422976	1026888768	86586048	86013200	112480696	1009506304	1377538048	1272178560	1296478720	1563415168	1325155712	1590526720	1486504192	1893199744	2851961856	2287600640	3368975616	3209041408	3629925120	3202353920	3154797824	307902176	3052557824	2807704320	2632915712	3239014400	22	22	20	50097	0	18514	P30520	P30520	Adenylosuccinate synthetase isozyme 2	ADSS
0	27005474	0	20938828	0	0	0	0	24967818	0	0	0	0	0	0	22079442	0	0	0	0	0	0	0	0	0	0	0	0	0	0	0	0	0	12676479	0	0	3	1	1	50208	1	-2	Q8N142;Q8N142-2;G3V5D8;G3V232	Q8N142;Q8N142-2;G3V5D8;G3V232	Adenylosuccinate synthetase isozyme 1	ADSSL1
36818364	24419500	45215492	25753168	74127624	12157381	3827922	10744606	13503562	19028568	17879840	3305502	7398194	41026572	9674714	9162784	30607548	23822440	23733308	6774586	12782898	88549728	56579336	7913615	99114184	101745952	82205024	11806307	84497888	96116672	100569808	105718128	90600288	52699968	103521048	81869312	8	8	8	13093	0	10072	Q8IUX7;Q8IUX7-2;Q8N436;H7C0W8	Q8IUX7;Q8IUX7-2	Adipocyte enhancer-binding protein 1	AEBP1
33015868	22924964	1693325	3177504	3819376	57875104	87253808	13584688	9697256	42274984	66829196	82338672	25280676	27050788	24862428	26292724	37564380	59822488	29317034	16349985	47200672	98518360	6081686	100730152	25284200	0	34148616	103108	51901624	35684436	3573601	56034252	34009932	38248004	66954960	32113812	6	6	6	54466	0	15292	Q6ZN18;Q6ZN18-2;G5EA50;Q6ZN18-3;F5GZR7;H0YH08;H7BYT4	Q6ZN18;Q6ZN18-2;G5EA50;Q6ZN18-3	Zinc finger protein AEBP2	AEBP2
0	0	0	0	0	0	0	0	0	0	0	149140752	49841864	0	0	0	120231432	193245664	89037040	111645704	144612064	103309040	107172232	194114848	74285808	8545752	63196484	88211384	63679008	58583536	103872640	9149206	318119200	33757832	98311408	89811280	2	2	2	28564	29562	22897	K7ELE3;Q08117;Q08117-2;K7EQH5	K7ELE3;Q08117;Q08117-2;K7EQH5	Amino-terminal enhancer of split	AES
51354688	45907476	57932096	50963216	90042480	48785736	67005192	50772448	80642904	104606328	120182896	91894976	55231832	55065144	45971120	50322260	24994332	71058024	32413144	24849660	54295184	4090026	53013380	20929660	30870096	3695693	55800672	26172516	21671502	11156502	1991857	51018352	20961896	21545826	27945534	2765215	7	7	7	13142	0	14494	P51825;P51825-2;P51825-3;F5GXF9	P51825;P51825-2;P51825-3;F5GXF9	AF4/FMR2 family member 1	AFF1
0	85702640	83674720	41797884	0	0	0	0	0	5581275	65230264	5338315	0	0	0	0	0	0	0	0	0	223387	0	431513	0	6298504	0	2890887	35891732	50788576	35950768	43661416	22105708	3530463	35086168	40003988	5	5	5	13347	16321	75585	P51826;P51826-2;C9J847;C9JZ66;C9JC67;C9J622;C9JMS1	P51826;P51826-2	AF4/FMR2 family member 3	AFF3
108156360	93982608	129582544	11114052	68008240	22195946	21691408	28948492	13821429	92825696	28082576	27509192	57111324	29114862	93370184	97458456	25828686	84876312	83966160	55643296	73324056	68524448	39634456	23852626	3138065	24932252	13750567	7354592	17087796	4961292	3628479	9619169	0	5854256	0	0	5	5	5	12746	0	13337	Q9UHB7;Q9UHB7-2;C9JCE0;Q9UHB7-3	Q9UHB7;Q9UHB7-2	AF4/FMR2 family member 4	AFF4
2034406656	2709815296	2766820352	2289253888	2392173824	1919459456	201373616	2143367040	2093910144	2630290688	2046745600	2623307520	1844377600	2322439168	1799080064	1948164096	1964348032	2335887104	173158096	1775539712	2094870016	2067629312	2190458368	2207820800	1633448064	1623876736	1508375040	1229459456	1351582464	1329971456	1423794816	1318920576	1951954048	1664489728	1767919360	1540206464	27	27	26	88583	0	31455	Q9Y4W6;K7EP56;Q01484-2;B7Z651;E9PHW9;Q01484-5	Q9Y4W6	AFG3-like protein 2	AFG3L2
127639944	154905328	1055196	128486376	183140960	182801856	290295520	16756561	221296768	232856896	279349728	224509808	18003216	170188144	148332576	147022640	22322300	224682512	178235200	221103088	127245912	177047248	245782720	164467424	65654592	54107836	7036862	49241152	66262780	99710760	110450656	100256056	8687077	80156696	85205904	41340116	14	14	14	1022	0	79139	Q6ULP2;Q6ULP2-5;Q6ULP2-2;Q6ULP2-4;Q6ULP2-3;B8ZZI9;A0A0A0MSN6	Q6ULP2;Q6ULP2-5;Q6ULP2-2;Q6ULP2-4;Q6ULP2-3;B8ZZI9	Aftiphilin	AFTPH
37870116	0	0	6601031	0	0	0	0	0	14621495	0	0	6519003	17173324	0	16608578	27595964	0	65845716	0	42020920	30709738	48111440	10183749	0	0	0	0	18024348	1901855	11240292	0	0	0	0	0	2	2	2	37208	1	-2	P20933;H0Y9C7;H0Y8L9	P20933;H0Y9C7;H0Y8L9	N(4)-(beta-N-acetylglucosaminyl)-L-asparaginase;Glycosylasparaginase alpha chain;Glycosylasparaginase beta chain	AGA
153060608	109958400	21308536	157725472	180861440	172711232	213425936	14645802	149216976	153858128	146834240	149143232	21460972	284624192	226245664	265363776	137034336	196438480	209099968	162171088	238694464	19340892	235513664	203506496	112900264	134929344	131493856	102541256	147018576	111820112	133568696	172365024	129861632	94407936	95184536	111247584	13	13	13	90536	0	58552	Q99490-2;Q99490;J3KNM6;F8VVT9;H0YHB1	Q99490-2;Q99490;J3KNM6;F8VVT9	Arf-GAP with GTPase, ANK repeat and PH domain-containing protein 2	AGAP2
84532240	65623284	77155680	115092256	84913256	103022616	94616256	28416016	85119472	126877824	120037920	127732768	100162224	77001984	82569152	124917544	71608272	112052816	91846768	81056944	128730768	120611976	6459755	81061704	54008396	75681656	50461832	98295264	64531296	66637956	75556736	127912016	42765304	74261984	33792548	87789216	8	8	8	95043	0	55137	Q96P47;Q96P47-2;Q96P47-4;Q96P47-5;H0Y873;Q96P47-3;Q96P47-6;C9J975;E7ESL9;H7C4F1;H7C5G0;H7C4U6	Q96P47;Q96P47-2;Q96P47-4;Q96P47-5;H0Y873;Q96P47-3;Q96P47-6	Arf-GAP with GTPase, ANK repeat and PH domain-containing protein 3	AGAP3
840455616	84708160	540447552	742245376	970003072	90627520	775574784	87446480	8789451	787043008	741321024	925316096	847206528	779922368	719174400	674168512	955543360	833771648	984723136	833187008	824915200	838892352	799460160	877074688	946507392	90447496	927712704	83473856	789960000	675304256	57861768	610817984	909261824	639351808	814748480	63695976	10	10	10	58259	0	19951	P52594;P52594-2;P52594-3;P52594-4;B8ZZY2;C9J2I0	P52594;P52594-2;P52594-3;P52594-4;B8ZZY2;C9J2I0	Arf-GAP domain and FG repeat-containing protein 1	AGFG1
37535372	33180816	2613168	30370364	25372968	30416056	0	27776106	29159234	3010622	34222480	22256520	24967336	2225953	27947286	0	21457982	28756912	24112444	37726524	27910936	25162298	24377466	19129524	0	0	19703282	28189332	0	0	0	0	0	0	0	0	1	1	1	48962	49888	19087	O95081	O95081	Arf-GAP domain and FG repeat-containing protein 2	AGFG2
0	193764368	12279092	31113892	336535136	9405143	297058720	7079289	334061408	3501781	307807424	373661920	240839456	256119760	251054768	9005511	241313120	291412416	0	212557664	364000672	35213852	297141280	296428000	21074232	28766732	15340646	0	14339337	19009406	24776126	44987704	4179808	0	35326400	33617296	4	4	4	80976	30012	47322	Q8N302	Q8N302	Angiogenic factor with G patch and FHA domains 1	AGGF1
4050551808	4895068672	4408772096	4867886080	3907481088	3981964544	422559616	3987903744	3463235840	331551936	384638112	3882591232	4843178496	4172040960	4129959424	4533476352	3842416640	3863396608	4628635136	3760495104	5129785344	4592289792	5377093632	4721816576	2680171776	2942680320	3138397696	3436516864	3176809984	2723985920	2504772608	2714840576	3482206720	2156743424	3377952768	30061104	15	15	15	47137	0	32331	Q53H12;E9PC15;A0A0G2JLG5;E9PG39;A0A0G2JLD0;F8WDD1;Q53H12-2	Q53H12;E9PC15;A0A0G2JLG5;E9PG39	Acylglycerol kinase, mitochondrial	AGK
169117296	337336544	276986592	368882656	256097632	365186080	250392608	327907040	192598784	274797984	208681328	220515792	280871968	264016864	196230448	181749776	294144992	208323232	281828224	277196256	245694544	197842544	168888912	16900708	467201216	629357568	560948096	637641728	445636192	707645888	757994944	760408320	713075200	836589760	816586304	722762944	36	36	36	17476	0	15152	P35573;P35573-2;P35573-3	P35573;P35573-2;P35573-3	Glycogen debranching enzyme;4-alpha-glucanotransferase;Amylo-alpha-1,6-glucosidase	AGL
70783344	75296048	9022252	203424352	207428496	191819936	180876528	228407312	117402464	63608436	6534839	72535136	75779976	10059661	78722992	93194560	138851296	24815004	205347392	116755896	84912424	54732704	135832048	58573048	82225792	108323792	0	137838976	7887436	54500944	53809028	67469952	0	0	36176152	30692208	3	3	3	3766	0	93465	Q9BSE5	Q9BSE5	Agmatinase, mitochondrial	AGMAT
57887272	21133900	60833904	40881308	29504336	12009357	51800256	47581704	30019256	40760624	26752148	69424416	55935436	63975824	52535464	49528436	69504456	78050360	37714216	61794436	28589184	67080920	27688212	64159036	63257856	37592572	74643080	65676404	37698324	50401180	58214876	63371036	43509752	35942704	56973520	30951848	16	11	8	97213	0	65679	Q9UL18;Q5TA58	Q9UL18;Q5TA58	Protein argonaute-1;Protein argonaute	AGO1
265761600	343931680	264864768	370133184	15534482	250390272	189596272	279294080	16199946	196432016	185721008	202066768	220688192	287056000	279637376	243484976	231131184	18650636	216667024	277415840	147386224	234700976	201082832	214416336	237208608	317874880	283452480	280408608	30148352	241154800	271901312	19071864	252627120	312839040	168365200	256572768	22	22	16	97207	0	33002	Q9UKV8;Q9UKV8-2;E5RJY2	Q9UKV8;Q9UKV8-2	Protein argonaute-2	AGO2
10885989	107594136	95901368	75708040	73298216	22204934	98564248	94298136	41498104	50808288	91594576	53839576	76948800	134931280	99932376	85781664	69849648	95329576	77613272	79434192	91390328	80962976	23139622	75022296	4581045	124724200	56418152	102892312	13749506	128060496	112211376	68629952	52085960	12859367	9945693	82577008	16	11	10	97359	0	42257	Q9H9G7;Q9H9G7-2;Q5TA56	Q9H9G7;Q9H9G7-2	Protein argonaute-3	AGO3
22883842	1247271	20252594	17901708	19938782	16968744	11058842	0	1327871	28682554	17544640	23112040	621796	19631980	508469	14325402	300296	326423	412314	261218	421309	11759532	295577	111062	0	157207	351304	0	4864299	0	0	394554	275754	0	5589537	0	9	2	2	97096	1	-2	Q9HCK5	Q9HCK5	Protein argonaute-4	AGO4
552120384	49543296	1161073664	543878848	1019914176	719322496	860103424	887347136	66329124	606014464	804608384	652643264	833784960	779142912	766705664	872672128	669213184	1118461312	576627520	301271616	711854144	60920732	362630080	492571488	160614992	14473005	204918928	174024448	321487072	244177760	555393344	291869696	21490168	202603776	218459600	250663504	4	4	4	31716	0	18702	Q99943	Q99943	1-acyl-sn-glycerol-3-phosphate acyltransferase alpha	AGPAT1
358253792	619330752	581893312	564062592	49871332	390237600	360221408	361518528	434733600	261419520	287121632	295014816	615411584	448997728	316422784	461297312	315247680	403410272	505412320	541260864	550083200	465266240	302494944	217173952	330668736	34434788	350992992	212627488	215922560	204512768	253015520	99806680	235176832	194043952	65768072	114556488	11	11	11	4338	0	13408	Q9NRZ7;Q9NRZ7-2;Q9NRZ7-3;C9JL26;C9J184	Q9NRZ7;Q9NRZ7-2;Q9NRZ7-3;C9JL26	1-acyl-sn-glycerol-3-phosphate acyltransferase gamma	AGPAT3
926851008	145792128	187280272	173913728	200328336	102189184	85630296	154523040	13714369	8405291	114460080	117071360	1589192	139491088	339572736	163721936	84975168	11002999	121023616	92073200	170744720	175771280	89159704	108177816	340423424	219962928	320319712	382544992	416907040	475616576	174692576	201716112	334516192	274000384	209234496	137446096	8	8	8	42072	0	41399	Q9NUQ2;E5RH21;H0YC22	Q9NUQ2	1-acyl-sn-glycerol-3-phosphate acyltransferase epsilon	AGPAT5
148362848	51482520	90673848	74451104	53475028	68232264	111107696	4309135	54210108	45065424	44493312	4248524	100557648	55805212	7532546	78801496	59136168	39490352	58539680	41784152	58680916	68763280	6790754	72638384	62185008	116448552	59917744	91020464	88073960	90092824	99209376	96440000	94839912	88601792	109515552	132892768	4	4	4	5207	0	65742	Q86UL3;E5RIA1;E5RHA6	Q86UL3;E5RIA1;E5RHA6	Glycerol-3-phosphate acyltransferase 4	AGPAT6
986089472	903616192	959780096	1106268672	1315597568	1018867840	1525955584	1176997248	668272128	855992000	98430272	97987704	112102304	1216844672	1118372864	1207747584	1299415680	1342626560	1113676928	1116939136	1139879680	1019205120	1197574272	1134125824	1156682368	1185156224	1260980224	926318272	1335314048	1494777600	1459014784	1646994560	167453264	1369768960	1377054080	1564145408	19	19	19	72911	0	32331	O00116;B8ZZ81	O00116	Alkyldihydroxyacetonephosphate synthase, peroxisomal	AGPS
0	4146859	0	10548071	0	2715438	0	3334616	3767856	0	0	0	5751786	13851585	15883791	1641778	2677522	0	2960933	4460409	25324244	6442948	6209237	6277552	0	0	1579377	0	0	0	0	0	0	0	1914798	0	4	4	4	21723	43975	40405	O00468;O00468-6;A0A087X208;O00468-2;O00468-3;O00468-5;O00468-4;O00468-7;H0Y5U1	O00468;O00468-6;A0A087X208;O00468-2;O00468-3;O00468-5;O00468-4;O00468-7	Agrin;Agrin N-terminal 110 kDa subunit;Agrin C-terminal 110 kDa subunit;Agrin C-terminal 90 kDa fragment;Agrin C-terminal 22 kDa fragment	AGRN
58608268	64849488	105059456	77549520	76263304	76419	7109321	69169944	85752512	73216944	77067584	8447941	40728360	79335464	50002936	70444032	39354888	94852880	35697248	45935592	62464380	65926472	45820552	19688238	30903376	64303132	40081504	52414128	47094116	63852496	81494456	85384456	55208480	32990546	64447288	36682680	9	9	9	13845	0	1309	Q9UPW5;J3KNS1;Q9UPW5-2;Q9UPW5-3	Q9UPW5;J3KNS1;Q9UPW5-2;Q9UPW5-3	Cytosolic carboxypeptidase 1	AGTPBP1
128430432	62771144	86392000	145807744	101635848	121836456	223029056	136064608	37422572	69544456	140416176	90976912	249631712	220843616	226996384	254819312	259543904	270164928	225456784	225358048	264103824	217857280	316907904	360400800	303059136	403004448	339922976	483611904	369956512	229269312	435290624	473464896	261830784	271372384	4208288	42955704	3	3	3	17419	0	12167	Q6RW13;Q6RW13-2;D6RB40;D6RBK6;X6R9H3;Q6RW13-4;Q6RW13-3;Q6RW13-5	Q6RW13;Q6RW13-2	Type-1 angiotensin II receptor-associated protein	AGTRAP
42652272	382417344	384859968	415570880	476912096	402261568	434259712	39859664	391772320	381491168	355220800	354440928	469870816	40908072	459878560	39054988	393546720	410926336	407403968	387843200	414427872	381078720	473498528	40415512	565020608	433354336	487156032	471034368	464816640	567092608	532372224	466805792	50274844	49282752	524021408	487451296	51	51	51	2525	0	32331	Q8WYP5;Q8WYP5-2;Q8WYP5-3;H7C4S1	Q8WYP5;Q8WYP5-2;Q8WYP5-3	Protein ELYS	AHCTF1
2627004928	2699015168	2361812736	3355278592	2773852416	2921966080	3118752000	2695764224	2930964736	3162624768	3012833536	2972591872	2390511104	2403053568	244495104	2386321408	27965900	2844921344	3069275136	2940646912	2471516416	2871659520	2744507648	2311922176	2521820160	2393805056	2310719232	250396320	2493978112	2297718784	2151113472	1949405440	2230988544	2058059776	2645002752	1964236288	22	22	22	47716	0	32331	P23526;P23526-2	P23526;P23526-2	Adenosylhomocysteinase	AHCY
660886208	417124288	359581952	459094976	705437696	506025056	552663744	1896425216	850361856	678434176	964087872	830265024	644570176	545133888	454100480	519899680	469604576	407056256	585110592	584303424	494124192	429346848	666522944	411494048	389843072	650159680	453013024	783787904	388215552	735798592	410725888	857404736	106283864	520520160	78969584	616099904	13	13	8	58951	0	45442	O43865;O43865-2	O43865;O43865-2	Putative adenosylhomocysteinase 2	AHCYL1
24421358	276788160	395817248	338286912	350666560	268159248	12889724	17542556	236919248	135887744	65344540	73116408	250797344	302071264	283224000	283636000	28536128	266471168	4907925	214405120	237223280	3979504	53672484	10497462	49728988	82374544	71180240	5366708	72044136	78814776	79312944	53828248	42871508	41011196	79807768	65035604	9	4	4	6672	14025	30271	Q96HN2;Q96HN2-2;H0Y8B3;Q96HN2-4;Q96HN2-3	Q96HN2;Q96HN2-2;H0Y8B3;Q96HN2-4;Q96HN2-3	Putative adenosylhomocysteinase 3;Adenosylhomocysteinase	AHCYL2
55282096	38654264	51148848	48534996	48895976	15922924	40058328	48448376	44412184	31366228	2771728	30576584	22982194	38290916	51913304	28866446	20252654	48212408	22657522	25699988	30649828	12663674	21615088	19497584	42003408	38007152	65581604	58052712	39646336	45681012	41413032	54653964	36787324	2487799	47151436	27293028	7	7	7	16835	29967	46883	Q5TGY3	Q5TGY3	AT-hook DNA-binding motif-containing protein 1	AHDC1
108399000	110651424	101180600	80314760	72006856	70138304	83968856	87525136	87497240	72091576	86384200	93709752	114854632	134280272	126130512	99369136	75874104	61696504	60397932	73185464	67232648	75229808	52903688	6034365	93062320	68518808	103889408	83694384	107585760	75960832	80910440	81270576	65388024	42924624	53385300	40423500	57	57	56	62909	0	10123	Q09666	Q09666	Neuroblast differentiation-associated protein AHNAK	AHNAK
3165106432	3615327488	3161615360	3097288960	3841322496	3953601024	3411749888	3497905920	2823245568	4350938624	3795290880	2798675712	3063476224	3718143744	354095040	4517094912	5435168768	5468291072	6237593088	468374912	399929760	487987136	4607557632	3868633856	6812710912	8129049600	8215923200	7413197824	8195163136	7620019712	6355014144	7140482048	5685219328	6050139136	6818456576	5981791744	16	16	16	38274	0	32331	O95433;O95433-2;H0YJG7;G3V438;H0YJU2;H0YJ63;G3V3W9	O95433;O95433-2;H0YJG7;G3V438	Activator of 90 kDa heat shock protein ATPase homolog 1	AHSA1
0	0	0	0	0	0	0	0	39794856	0	0	0	0	0	0	0	12002373	0	0	24947252	0	19540356	0	24113396	29999252	0	73094600	41059252	24863476	28481758	0	16881996	21415472	21876256	14847847	28908312	4	1	1	39324	46223	20045	P02765;C9JV77	P02765;C9JV77	Alpha-2-HS-glycoprotein;Alpha-2-HS-glycoprotein chain A;Alpha-2-HS-glycoprotein chain B	AHSG
275540544	396368608	263588880	393436704	541177920	419126016	474814912	414582304	157424816	350615616	405120864	4078518	484469216	315749984	387687712	347878368	340902688	413670432	326111936	33418452	24237132	27512408	386451424	333458272	68375600	635682688	562038144	693140864	683424832	688106560	805980864	784069376	716329728	690909952	727206272	655323264	8	8	8	35023	0	13038	Q96BJ3;Q96BJ3-3;Q96BJ3-2	Q96BJ3;Q96BJ3-3	Axin interactor, dorsalization-associated protein	AIDA
3191260416	3073373184	3039838976	365222592	2935655680	261489440	2644171008	2819320832	2930930944	2969230336	2644237824	3141026304	3605795840	3397343232	3700814592	3567918080	3596072960	3273233408	3145300736	3357918720	3307133696	3338826240	3849480960	3780463104	525619104	5549956608	5384098816	4797899264	6089507328	5158692864	593988288	5618613760	538286144	5853303808	5348478976	5029182976	25	25	25	669	0	32331	O95831;O95831-3;O95831-2;E9PMA0;O95831-5;O95831-6;O95831-4	O95831;O95831-3;O95831-2;E9PMA0	Apoptosis-inducing factor 1, mitochondrial	AIFM1
20269912	20787796	11605009	12082078	35726412	23248600	2691504128	41837556	3017332224	3400950016	3001037312	3306802176	4193739008	4592879616	4075393792	4380259840	37702356	3490719	3590567168	34865784	3789550080	3704142336	3402572	3594187520	3953712384	4839046656	4641952768	3708769792	3614968320	234635	25221592	34325392	27766278	25621808	58114416	30408054	11	11	11	18867	0	11235	Q9Y4K1;Q9Y4K1-2	Q9Y4K1	Absent in melanoma 1 protein	AIM1
28736888	0	0	16214153	55219364	10544426	30787324	0	67083736	0	17401068	22425036	36983336	22412720	47877244	25721572	0	16582741	28997886	24240588	19262564	12517108	10046857	19149924	95348568	163574528	12559322	188042448	192896096	176352896	165461856	184026048	258740752	185567024	263115360	228841648	10	10	10	38953	1563	59805	O14862;A0A087X0L4;Q5T3W0	O14862;A0A087X0L4;Q5T3W0	Interferon-inducible protein AIM2	AIM2
3863845120	2541285632	3536306432	3905871360	2281813248	4329373184	3849156864	4158189056	4208006144	4785746432	3253217792	2687435776	3897622016	3996948480	3531378176	3852792832	2418975744	4208540672	3226122752	3460203264	422956704	4365898240	3516783360	3406304256	8307456512	3925832960	7422341632	1010309888	7738555904	9960822784	9319977984	9630795776	5389353472	8999249920	988759552	5480635904	15	15	15	34352	0	32331	Q12904;Q12904-2;D6R937	Q12904;Q12904-2;D6R937	Aminoacyl tRNA synthase complex-interacting multifunctional protein 1;Endothelial monocyte-activating polypeptide 2	AIMP1
48082656	135456848	143444960	138504400	185711168	172239184	188980080	39994988	170682512	163344928	82720040	228179552	217316240	83549680	146268752	0	257861712	158293376	182088128	140589888	177627760	142898352	142350848	308705856	246835056	25237464	58247380	456974848	235384640	224539504	388305632	507096928	429925760	478010656	527245504	649171968	9	1	1	27809	0	10391	F8W950;F8WCL2	F8W950		AIMP2
596327936	709792064	81532080	701980096	113069912	1160424448	1093368320	934876416	947313600	1679274752	147632768	1470573312	835606848	978094272	960457984	959020096	132655528	1198785792	731229824	1410970112	1577825408	1534524928	2329084416	2276159488	1347936896	2579461120	2164231424	2579311104	2518781184	1903706368	1565118080	2932318976	3364759808	2696750080	1276553728	31363984	10	10	2	35348	0	32331	Q13155;A8MU58	Q13155;A8MU58	Aminoacyl tRNA synthase complex-interacting multifunctional protein 2	AIMP2
4337511936	4469218304	4050782720	527293824	5031925760	5296572928	561409856	5762164736	4597065216	5470117376	4980024320	5085749760	4630052352	4342873088	482677792	4102008320	6029258752	5843380224	5702493184	5997887488	3996452608	4737633792	6367252992	5031497728	4805793280	435684704	5612389376	5223063040	508335392	6233675264	5717186048	5439567872	4726856704	5330363904	4514015232	5353754112	14	14	14	37636	0	18269	O00170;E9PMH2;V9GYQ3	O00170;E9PMH2	AH receptor-interacting protein	AIP
117050864	1261315072	9832990720	1029671936	685082048	1111118848	9799695360	1299042304	1202015104	1054716800	1056320256	1057443008	1367630208	1303831936	1264931840	1347558144	1363216512	1377079040	1197531136	130247280	126767416	1338275584	1631821824	1342751360	1672969600	1687763712	1657425536	1797343360	1505753472	1364245888	1442708864	1507353472	1745022848	1368839936	139050640	1486403328	15	15	15	26477	0	25267	P54819;F8W1A4;P54819-2;F8VY04;P54819-5;P54819-6;P54819-3;F8VZG5;P54819-4;G3V213;F8VPP1	P54819;F8W1A4;P54819-2;F8VY04;P54819-5;P54819-6;P54819-3;F8VZG5	Adenylate kinase 2, mitochondrial;Adenylate kinase 2, mitochondrial, N-terminally processed;Adenylate kinase 2, mitochondrial	AK2
4666867200	3877830656	4533079552	4667817984	403990688	4287538176	3859566080	3912182784	485193888	5731901952	4999820288	568185664	4969910784	523933088	4732172800	527373472	4111877376	458605152	4050523904	3853296640	407688160	4592082944	5356634112	6885995520	6098152960	689227328	6647496192	5817656832	5580564992	4631959552	641119616	5324516864	5319677440	5605331456	6081432576	6148808192	15	15	15	25565	0	88344	Q9UIJ7;Q9UIJ7-3;Q9UIJ7-2	Q9UIJ7;Q9UIJ7-3;Q9UIJ7-2	GTP:AMP phosphotransferase AK3, mitochondrial	AK3
3490364928	3548217600	3869235968	2701950976	454359360	4998102016	91875040	1320812800	466863040	788893056	933046656	796694400	3561457920	3897826048	2440782848	4092822272	1001667200	733257856	889560000	806632192	891813888	77927952	831983296	77084016	4361078784	6428573696	5691748352	6696058368	3935183872	2182990336	3673650944	2619398400	3999135232	3623605504	3853283072	1937060736	11	11	11	25268	0	1597	P27144;D3DQ64	P27144;D3DQ64	Adenylate kinase 4, mitochondrial	AK4
2244824832	2105636480	1979063808	191050224	3157792512	289639488	3792591616	2616311040	4965428736	4976415744	6018675712	5286977024	1728065920	2688158464	293482816	2156255232	2847498752	3633018368	3338608384	2996233472	49841224	5322800640	4691704832	3336152576	4876154880	5250482176	4037189888	599466816	5688792576	5875175936	6615120896	6927458304	1007256960	118656976	1069731648	1185853440	5	5	5	20061	0	20504	Q9Y3D8;A0A087WVD7;Q9Y3D8-2;D6RDH4;A0A087WY94	Q9Y3D8;A0A087WVD7;Q9Y3D8-2;D6RDH4	Adenylate kinase isoenzyme 6	AK6;TAF9
0	0	6964522	279154	10885762	0	7121735	10458654	3302301	12456817	11472892	0	4789082	9952014	0	14818341	12862358	23968204	10148269	11974552	1714093	5083987	7011028	12570387	14188667	7929096	9092934	11487148	10134424	0	2732547	0	0	0	0	0	1	1	1	22141	1	-2	Q5TCS8;J3KP89;Q5TCS8-2;Q5TCS8-1;Q5TCS8-3;Q5TCS8-6	Q5TCS8;J3KP89;Q5TCS8-2;Q5TCS8-1;Q5TCS8-3;Q5TCS8-6	Adenylate kinase 9	AK9
68917464	68613600	8851541	88696752	878342	96288656	147488432	90831800	125367024	15628292	172106656	125559920	68040856	59073548	66280984	5412985	97180856	87489672	78541944	102966232	52735896	100464472	1620451	104770704	235651840	178954288	178392464	189538880	256393920	148605168	244078640	18889808	318544256	227750048	57745696	188263664	18	18	18	9734	0	15577	Q92667;Q92667-2;I3L0W0;I3L2A2;I3L2N7;I3L0K6;I3L3K1;I3L364;I3L0V5;I3L3V6;I3NI36	Q92667;Q92667-2	A-kinase anchor protein 1, mitochondrial	AKAP1
59605896	59413192	60124272	39484856	49055760	41008640	37456800	43433440	59582376	25390856	49523316	42837976	66312780	64172356	31322840	49289128	79039104	59712104	65167308	77250464	32924436	37109188	55508160	37850128	8467975	42800400	43710936	2874489	33923536	58576888	27770782	48291320	23168134	33479666	33751572	23952452	13	13	13	21051	0	65236	Q9UKA4	Q9UKA4	A-kinase anchor protein 11	AKAP11
17438492	10919953	13838278	9426399	9588953	8352388	8641927	10298928	9495563	9378597	7741862	7598296	11064429	10502988	13917089	11076442	16130068	7738905	10638223	11546264	12893638	17270978	12986424	16842728	425496064	431113696	449510592	399054528	392565248	443426240	42429620	374714176	526381856	430560896	437050752	420210624	26	26	26	19148	0	32331	Q02952;Q02952-3;Q02952-2	Q02952;Q02952-3;Q02952-2	A-kinase anchor protein 12	AKAP12
198016224	184918272	194782480	228058048	272726112	243817808	261409648	22556752	174642656	247448448	172705808	185545008	221781296	251210160	235830400	203197648	24083644	228445712	266422656	23470308	194115184	211748016	181455008	141057008	135917264	162102144	153706000	161654656	157307280	152608912	147468688	141731808	133594928	123335016	118673304	114169328	38	38	38	30755	0	32331	Q12802;Q12802-2;Q12802-4;A0A087WTD7;H0YMW2;A8MYJ1;A0A087WY36;H0YK84;A0A087WX73;H0YLH1	Q12802;Q12802-2;Q12802-4;A0A087WTD7;H0YMW2	A-kinase anchor protein 13	AKAP13
629221632	526194432	37854120	405050880	655056128	329771712	499533792	420581888	448605984	286886624	398952128	239270784	393516256	378412192	319572800	390176704	282956320	348273792	362876032	295639520	242826288	228991424	63491496	166415968	299126656	272672352	306383264	348410912	317173920	129500888	112946496	408522144	165038704	144682288	36854644	176796224	11	11	10	80735	0	91161	Q02040;X6RAJ1;Q02040-2;Q02040-3	Q02040;X6RAJ1;Q02040-2;Q02040-3	A-kinase anchor protein 17A	AKAP17A
151524272	125087136	78831712	13566276	114722888	1078833	2110731	83418600	134311424	113594800	84085832	16732888	134323568	104143	150327008	86021872	15696735	117740368	138275408	141519792	115131640	160681760	176318672	218913056	17419506	294163872	148946080	21362992	12067665	197792592	149090560	143360816	167934864	188781184	169678752	192040112	13	13	13	94659	0	24456	Q9Y2D5;Q9Y2D5-5;Q9Y2D5-6;Q9Y2D5-4;Q9Y2D5-7;C9JVY5	Q9Y2D5;Q9Y2D5-5;Q9Y2D5-6;Q9Y2D5-4;Q9Y2D5-7;C9JVY5	A-kinase anchor protein 2	AKAP2
48572936	523018112	45742292	489596576	510025536	526592256	700703104	547105152	598279808	618237568	659622912	649526656	511455136	503062176	448938848	601379328	828285312	538827840	390586720	545865920	432283712	588909120	514259136	685396800	707166976	870992448	525641504	929712000	847450880	10203949	59254104	743178112	1118810240	702390336	1153899136	851029824	17	17	17	76107	0	25331	O43823;M0QYL4	O43823	A-kinase anchor protein 8	AKAP8
274442176	276472704	304986112	264635008	284658816	297511456	298857088	353725888	246841360	21059352	239577728	207137024	404843072	315934144	332650400	326593344	348831712	338824768	301416608	322097504	143963872	222176032	245013280	241455952	495765248	545738240	544408512	557300928	559432960	55136756	38941928	372523552	482815456	280053504	328257280	431379840	10	10	10	71648	0	70724	Q9ULX6;Q9ULX6-2;V9GZ50;M0R1Y5;M0QYT7;M0R010	Q9ULX6;Q9ULX6-2;V9GZ50	A-kinase anchor protein 8-like	AKAP8L
155034256	162087920	135624064	18966922	172241600	190948832	132006728	161376512	143247424	139873968	132156408	138276208	176126752	144430512	147906720	142337472	14110393	151683312	179765808	157654704	146626256	128542296	73551800	47158380	77662008	66628580	70536936	95210320	49479800	60307768	67809224	68263672	62175560	35006236	43113596	42122860	62	62	62	45366	0	19452	Q99996;A0A0A0MRF6;Q99996-5;Q99996-3;Q99996-2;Q99996-6;A0A0A0MRE9;H7BYL6;A0A087WX84;Q99996-4;H0Y6Q0;H7BZV6;Q6PJH3	Q99996;A0A0A0MRF6;Q99996-5;Q99996-3;Q99996-2;Q99996-6;A0A0A0MRE9	A-kinase anchor protein 9	AKAP9
0	0	13702015	0	11144561	12137651	0	2004076	0	9193525	0	11720329	0	39666180	0	7658212	0	42902384	7792542	9493428	3462479	0	12887281	29419100	5979867	7215673	7546272	8704319	7589644	8255251	9748266	862842	7181495	7504359	13527985	10336935	4	4	4	15514	85507	33702	Q7Z591;Q7Z591-7;Q7Z591-2;Q7Z591-5;Q7Z591-8;Q7Z591-4;Q7Z591-6;Q7Z591-3	Q7Z591;Q7Z591-7;Q7Z591-2;Q7Z591-5;Q7Z591-8	AT-hook-containing transcription factor	AKNA
5829109248	6037404672	6238327808	6153624576	6783343104	590673984	6555365376	6203905024	4358163968	4384306688	4155153920	4793497088	635120640	5592762880	6093255168	5716853248	6987396096	7247350272	6433000960	6601572864	3572682752	4032345344	4352301056	3679274240	3399008512	3725284608	3784918528	3552693760	3483358464	3184701184	2680175872	2974805504	222769712	207357728	2004324736	2106361984	17	17	17	36573	0	18491	P14550;V9GYG2;V9GYP9;Q5T621	P14550	Alcohol dehydrogenase [NADP(+)]	AKR1A1
2132509184	2054218880	1765813504	195271072	1703288832	1905906944	1811736576	1973051520	1648519936	1593036544	1647926144	1660736128	1438826112	1859243776	184798432	1859822848	1905442048	1666627200	184609680	1828419456	1263631232	1490537600	1430079744	1410889088	1885808128	1879244032	1770692864	1541604736	1611542016	1586782208	1514739200	1422164608	1140171136	1350950016	1410133504	1379106944	17	17	17	35853	0	32331	P15121;E9PCX2;E9PEF9;C9JRZ8;C9JRZ8-2	P15121;E9PCX2	Aldose reductase	AKR1B1
2749346304	2344681216	3227667200	2524726784	240921376	2259019776	1759042560	2101702144	2378070272	2250307840	2278157056	3201487872	2473829376	2622404608	2809694976	3577068032	2485138176	3353883392	2136082048	1945968512	2534691328	2591463424	2101143424	2140284800	4349424640	4451172352	3436979200	4125460992	3721489408	3714671104	4795543552	4853608960	3028363008	3227579136	4139221504	3085972480	8	8	8	39589	0	11026	O43488;H3BLU7;Q8NHP1;H7C5H7	O43488;H3BLU7	Aflatoxin B1 aldehyde reductase member 2	AKR7A2
88000864	1055703680	774217856	891587968	895217664	81035856	763753984	581063232	643862080	743209536	671678464	954815616	739642688	723062464	705525376	890648128	609211392	787702272	643770752	683814080	799199296	63198792	533316000	497718272	520318144	443732256	580559360	534949536	389326624	356793728	418389568	607698240	273767168	418324224	482994144	453169376	14	10	9	55686	0	46267	P31749;P31749-2;A0A087WY56;G3V2I6;G3V3K5;G3V3X1;G3V4I6	P31749;P31749-2	RAC-alpha serine/threonine-protein kinase	AKT1
104565040	87406872	66050608	169075504	164198752	259480944	218751760	197741216	245135664	268825216	187458432	241215216	152339680	202882448	248962624	173152880	179217040	158704832	2926765	228709072	315089952	243513600	149656320	178253408	16141978	176405296	105201656	95421104	25252892	201742576	255820080	238076176	96228216	26243668	230971792	245882256	4	4	4	27383	0	51462	Q96B36;Q96B36-3;H9KV91;Q96B36-2;M0R2V8	Q96B36;Q96B36-3;H9KV91;Q96B36-2	Proline-rich AKT1 substrate 1	AKT1S1
2068426368	2458700288	2875993344	277717760	2357738240	2541151488	1774862208	2328650496	2582232064	2170059264	2280900864	20744756	1746148736	231938784	1932076544	2258286336	1691765248	1820909568	233780048	2166289920	2179307264	1829874688	2404431360	1849363072	663791360	763688640	607980544	764052480	977895616	778990784	1087141760	1156095232	704637568	778684096	864478784	801188224	19	19	15	55768	0	78378	P31751;P31751-2;M0R0P9;J3QKW1;C9JHS6;J3QLS6;J3QL45;J3KRI8;A8MX96;E7EVP8;M0QZK3;M0R275;M0QZW8;J3KSY8;C9JC83;M0R283;C9JIJ1;A0A0A0MRF1;J3KTC6;C9JIF6;C9J258	P31751;P31751-2;M0R0P9	RAC-beta serine/threonine-protein kinase	AKT2
362223456	186394080	271681664	259172416	25536518	28671102	244231936	258457408	22975972	251513904	247306720	24221248	249257376	176047552	185897120	207724592	25826908	66964372	233660256	260608768	0	0	103085104	82360872	110316272	39870084	120474464	11140557	76960344	102363040	223750352	172579664	56047704	185197600	70030896	124157968	8	5	5	55774	30262	49225	Q9Y243;Q9Y243-2;F8VS91	Q9Y243;Q9Y243-2	RAC-gamma serine/threonine-protein kinase	AKT3
287145440	212428880	55904164	276856352	298304096	257563104	252823072	32488342	335970272	697208896	684229952	222566080	230354720	386389504	321664928	396309760	373798240	349430656	209629280	160677904	370866336	252946032	324731424	263504448	12731207	145787808	297517760	132041056	357725088	351932672	445152576	319420512	26562922	312823808	325062144	252279472	8	8	8	39033	0	22742	P13716-2;P13716;B7ZBK6	P13716-2;P13716	Delta-aminolevulinic acid dehydratase	ALAD
84322128	61070272	321540864	159594000	13715214	56928120	28912248	90702464	23464364	625379904	13959141	46008952	27072520	45148636	13717041	56339696	43158664	4054495	27038116	8648901	51590472	18948740	0	25749640	93991312	52919972	90845184	67579624	10738428	100191728	132045424	99187088	136302512	98301280	72185264	102725952	13	9	9	69366	0	83745	P02768;CON__P02768-1;A0A0C4DGB6;H0YA55;A0A087WWT3;C9JKR2;D6RHD5;B7WNR0;P02768-3;P02768-2;H7C013	P02768;CON__P02768-1;A0A0C4DGB6;H0YA55;A0A087WWT3;C9JKR2;D6RHD5;B7WNR0;P02768-3;P02768-2	Serum albumin	ALB
380376704	403084992	233422928	176464992	159497904	244254432	413820672	37972928	208914640	281804096	454229984	300436256	268699424	337267552	232682016	31447184	224352864	210536752	292206752	247508560	260257952	319899744	295688992	291516064	358235392	480065664	238878848	367634496	187314240	258651744	184557552	206538528	247806336	165450160	208141808	222414144	9	9	9	65102	0	25547	Q13740;Q13740-2;F5GXJ9;H7C543;Q13740-3;Q13740-4	Q13740;Q13740-2;F5GXJ9	CD166 antigen	ALCAM
4387599872	4408101888	6046160384	5094183936	5678402560	5026968576	5452203008	4280865536	6004653056	6429281792	5892846080	7299753472	42063136	5709577728	4398980096	4752459264	4176840448	60250448	374131680	3872998912	6650538496	6662816768	6043430400	4615222784	1629527552	1382182016	1623036672	1881447424	1434495872	1575126528	1676235136	1675363328	1737772928	1782332288	1800263936	205253216	17	17	17	85126	0	32331	Q8IZ83;Q8IZ83-3;F5H4B6;Q8IZ83-2;M0QY06	Q8IZ83;Q8IZ83-3;F5H4B6	Aldehyde dehydrogenase family 16 member A1	ALDH16A1
575605248	6089746944	5874635264	6640338944	8768331776	8160425984	9596846080	8532742144	8329197568	8978878464	8896113664	8403046400	6926324224	7547274752	6908193280	6540712960	8088668160	9224159232	8412732416	8074203648	107029360	9434853376	9813141504	9941849088	430159104	4366204416	4855242240	4542628864	4738520064	4675453440	5184296960	5344712192	4230494976	4269924864	4769873408	4333488128	36	36	1	87301	0	32331	P54886	P54886	Delta-1-pyrroline-5-carboxylate synthase;Glutamate 5-kinase;Gamma-glutamyl phosphate reductase	ALDH18A1
0	0	25484744	10497614	0	25032380	0	22124260	0	0	25878416	0	9653463	22259492	0	0	20989068	23501056	16183578	0	43838364	35823432	3280724	0	0	0	0	7854686	0	0	0	0	0	0	0	0	36	1	1	87088	0	10331	P54886-2	P54886-2	Delta-1-pyrroline-5-carboxylate synthase;Glutamate 5-kinase;Gamma-glutamyl phosphate reductase	ALDH18A1
13538804	222000592	202797840	152879488	109720144	93421552	142915680	179038064	27400062	40850856	95540240	103912096	126565000	253289696	200188368	131493248	189762112	182220112	21666764	260241280	73850224	171792656	169927856	121685944	403799360	556910016	814071360	721706816	709643392	701347776	759791168	607726144	720965312	753232832	716561728	726689280	9	8	8	57206	0	8694	P30837	P30837	Aldehyde dehydrogenase X, mitochondrial	ALDH1B1
4154457088	4027159552	3200027648	4425026560	35820704	354817824	2840555776	3759148032	374148928	3482886912	32957762	3351250432	4606625280	3939891968	388174368	4474262528	3646617344	374471104	3891924224	3872459008	413620064	3316696064	4028142848	3326925312	2692411904	1980228224	2090464256	2145351936	1881635328	1835344768	1750937216	1674141696	1913948928	1861202944	1924561408	163318912	20	20	18	56381	0	28141	P05091;P05091-2;F8VP50;S4R3S4;P00352;Q5SYQ7;Q5SYQ9;Q5SYQ8	P05091;P05091-2	Aldehyde dehydrogenase, mitochondrial	ALDH2
943195264	859501056	964874112	1368716416	1326033536	960943232	1185849088	914416896	1181774848	996080576	1034505088	996273344	1011740416	956606208	974779968	826854656	90343936	1076774528	1315972736	1019716096	1073258560	1034391040	1086574336	921277312	105523384	853074432	964397440	1360797568	649981504	567898624	665705024	787908928	741729280	647868416	681334976	1241896832	10	10	9	54847	0	91707	P51648;P51648-2;J3QRD1;I3L1M4;J3QS00;P43353;P30838;J3QKK9;J3KTD9;I3L2W1;J3KTG1;C9JGJ2;I3L0X1;C9JKT2;C9JMC5;I3L3I9;A8MYB8;E9PNN6	P51648;P51648-2;J3QRD1;I3L1M4	Fatty aldehyde dehydrogenase	ALDH3A2
29961938	231520800	141952672	235499376	149290960	137784480	211875984	175202496	115583224	166826832	193957728	128877880	21258108	125814816	133118464	65885260	228080800	130322296	18883136	201834192	14932822	1040417	153238896	127860144	43332760	35943520	69539200	37002444	46093824	4452415	24056224	52590872	5290624	10425623	23153024	0	11	11	11	61719	0	50965	P30038;P30038-2;P30038-3;Q5TF55	P30038;P30038-2;P30038-3	Delta-1-pyrroline-5-carboxylate dehydrogenase, mitochondrial	ALDH4A1
2984278016	243712480	2924122624	2964405760	1886078720	2813958656	2164007680	257393504	1753393792	1378358144	1323070208	1337054592	3392214016	328733696	3209027584	3415014144	3175587328	1877490816	2758602496	2994004480	2215871232	1769674368	2037865600	1729062784	1014620736	1391324032	117024064	896377728	1002459456	1142635776	105222016	1191209728	129221016	979067520	871356352	686582336	15	15	15	57214	0	13369	P51649;P51649-2;C9J8Q5	P51649;P51649-2;C9J8Q5	Succinate-semialdehyde dehydrogenase, mitochondrial	ALDH5A1
1157378048	1002693312	1228698240	1086415872	929793152	1008942400	820769472	1068147776	376084768	446825024	324686592	45856112	1167080320	925142912	876375680	1116342656	936535424	1107154560	84789088	880302720	393726208	477853248	629529984	540107264	690470656	817851008	730887616	869184256	681568896	537961728	526114880	630314688	288214560	218260912	34787964	214549968	15	15	15	57839	0	13661	Q02252;Q02252-2;G3V4Z4	Q02252;Q02252-2;G3V4Z4	Methylmalonate-semialdehyde dehydrogenase [acylating], mitochondrial	ALDH6A1
241745408	159126592	136125904	178525600	125154768	138695840	145605344	147023664	79777320	16375448	35886904	61909716	183534464	163901632	158700720	117658656	145559216	305729920	277822208	242669568	50273976	78949040	145326064	63234624	2670891520	2536200704	2546524160	2411469568	2296721408	2155704064	2702372096	2503078912	2207901440	2475358720	2393773312	2666071040	20	20	20	55366	0	20937	P49419-2;P49419;P49419-4;F8VS02;P49419-3;F8VVF2;H0YHM6	P49419-2;P49419;P49419-4;F8VS02;P49419-3	Alpha-aminoadipic semialdehyde dehydrogenase	ALDH7A1
191792512	1552663296	1914391296	105109608	1727607680	1473759488	1947781120	2160618240	1880483456	229353024	207113680	2176190976	2448632064	1931915392	1946250624	2276319488	2145632640	2453378048	1485328640	1986132864	2304175616	2556499456	2231801600	1964361728	208791648	213278848	1683883136	2309901312	1751346560	1464234880	1998136448	1776788992	2675082752	2018406272	2549668864	2119538304	12	12	12	53801	0	23826	P49189;P49189-2	P49189;P49189-2	4-trimethylaminobutyraldehyde dehydrogenase	ALDH9A1
1969752192	1886703360	204454032	1695892864	1243617408	122188480	1220223488	1351348352	1532568832	1169151744	128620296	1184115840	155345968	1669808640	1717952384	1729820544	1349984768	1187652096	1201527936	129420512	1533502592	1412327680	1066674432	1241357824	1567511424	1534722816	1561787392	1678333824	1287786496	1243494784	138444400	1311498368	1374738304	1468935552	1468062080	1700183808	34	34	29	3942	0	32331	P04075;J3KPS3;P04075-2;H3BQN4;H3BPS8;H3BUH7;H3BR04;H3BMQ8;H3BU78;H3BR68	P04075;J3KPS3;P04075-2;H3BQN4;H3BPS8;H3BUH7	Fructose-bisphosphate aldolase A;Fructose-bisphosphate aldolase	ALDOA
2752285952	2242284032	2626625536	2210835456	9435547648	111194176	1069145664	133816056	8929028096	9353001984	8902789120	1075894656	2482770176	2023564672	2238682368	2625886464	9825280000	9471664128	9338082304	10044548	989736832	9165955072	7708477952	8883973120	2002135168	1994905088	1961266944	2126471936	9726474240	8109720576	8486405120	8059392512	7991331840	5394591232	6531839488	6648742912	25	20	20	39455	0	32331	P09972;A8MVZ9;J3KSV6;J3QKP5;C9J8F3;K7EKH5;J3QKK1;P05062;A0A087WXX2	P09972;A8MVZ9;J3KSV6;J3QKP5;C9J8F3	Fructose-bisphosphate aldolase C;Fructose-bisphosphate aldolase	ALDOC
212945152	208592576	152654112	346249376	147381792	191420736	160670448	147221392	29931928	248029120	322143136	171689088	329317248	225058224	217566560	19138388	110655248	150932656	244265520	181738944	178952192	127136608	175361536	192953184	318540416	340323680	238647040	351671904	233849024	285733152	285694144	39509148	422835424	333710208	49270808	446751552	8	8	8	52518	0	1082	Q9BT22;Q9BT22-2;K7EID2;K7EPU3;C9J202;K7EQK1	Q9BT22;Q9BT22-2;K7EID2	Chitobiosyldiphosphodolichol beta-mannosyltransferase	ALG1
109966416	129091840	167429488	161136272	173451056	18423776	11559444	125764272	87092560	92806720	93296312	143023248	146257664	166287904	99622768	18355724	8573011	140793872	216114992	131390056	177391728	92931872	106641472	112430072	127008968	358507328	255735280	373289056	231787520	107939272	218966544	21828264	309798720	32995234	239389760	203994400	6	6	6	55605	15883	65688	Q5BKT4;Q5I7T1;F8VWA9;F5H5T2;F8VXJ0;F5GZZ6	Q5BKT4;Q5I7T1	Dol-P-Glc:Glc(2)Man(9)GlcNAc(2)-PP-Dol alpha-1,2-glucosyltransferase;Putative Dol-P-Glc:Glc(2)Man(9)GlcNAc(2)-PP-Dol alpha-1,2-glucosyltransferase	ALG10;ALG10B
15516757	17479544	11518869	17691176	16095525	13998841	16927092	18620176	11315993	0	22660636	16425595	17420552	16332835	14322083	15056098	25085092	17235176	2148604	18980640	0	20096198	15253038	17809096	14371549	10247055	11132666	17235104	0	17296502	15474841	1505608	0	1487362	15483803	14029358	1	1	1	5565	44577	4423	Q2TAA5	Q2TAA5	GDP-Man:Man(3)GlcNAc(2)-PP-Dol alpha-1,2-mannosyltransferase	ALG11
10644803	0	14795848	27957408	14103021	14211811	23957238	2537304	2142821	26406340	12055206	0	37007644	12471678	32420164	21517898	2868138	30826742	12376354	1156127	0	26276228	11176146	9963844	33340888	0	9940711	7151499	11346414	38138664	15911027	8149815	12989654	14307431	846649	12798005	2	2	2	54654	71798	35411	Q9BV10;H7C4I6	Q9BV10;H7C4I6	Dol-P-Man:Man(7)GlcNAc(2)-PP-Dol alpha-1,6-mannosyltransferase	ALG12
0	26840788	0	0	0	11237644	2315084	128924832	50293828	212761984	161521392	194291856	0	195404032	66151224	148467168	32510600	27928848	31504884	0	245754704	327763616	0	133527528	25604656	17067392	0	0	255483408	23294456	0	78496144	18187568	323616128	130457760	45328720	4	4	1	17801	71087	17121	A0A096LP10;Q9NP73-2;A0A087WT15	A0A096LP10;Q9NP73-2	Putative bifunctional UDP-N-acetylglucosamine transferase and deubiquitinase ALG13	ALG13
209228736	0	0	0	0	0	0	0	0	0	0	0	0	0	0	30787436	0	0	0	0	61183368	0	0	2220242	0	0	0	0	0	0	93594352	0	0	84194976	0	0	4	1	1	17574	1	-2	D6RE84;A0A087WTT9;Q9NP73;A0A096LNJ4;A0A087WX43;Q9NP73-3;A0A096LNL2	D6RE84;A0A087WTT9;Q9NP73;A0A096LNJ4;A0A087WX43;Q9NP73-3	Putative bifunctional UDP-N-acetylglucosamine transferase and deubiquitinase ALG13	ALG13
16262438	91398	19096674	36355208	18114648	1281621	20683576	32866068	44783736	54379160	34877652	0	0	2556188	0	1550136	17285332	0	48981696	49530516	0	2867928	80112400	3739258	58257324	62212624	134892096	33717016	49198904	59003944	42027168	0	29511156	28445814	67306336	13800808	3	3	3	2415	43962	40347	Q96F25	Q96F25	UDP-N-acetylglucosamine transferase subunit ALG14 homolog	ALG14
84149056	1100547456	1055690304	93066920	8781242	1206072576	1127486464	1189598208	914445568	785638848	1041401024	1063030656	560266304	1383074944	1176833920	1144795904	1265619712	1500590848	1181267840	1066597440	1323656832	892035776	1593682816	843835904	840319104	1095000832	834444544	798391488	577199232	745670144	720265152	767963648	900643264	708462016	815306624	506490496	11	11	11	47091	0	43867	Q9H553;Q9H553-2;A0A0A0MTE0	Q9H553;Q9H553-2	Alpha-1,3/1,6-mannosyltransferase ALG2	ALG2
41098512	50751016	74837928	62229888	69450112	46097080	38888872	41585488	49108000	4029014	39874264	33218540	44494992	50631984	49899144	57350000	26428376	60909672	49094476	41416368	59030216	52573936	46074040	69680440	100235912	10127525	138927552	124284968	141816864	139167104	119391024	16069571	115178400	89067968	89931536	168474656	3	3	3	50126	0	15271	Q92685;H7C0X4;C9J7S5;Q92685-2	Q92685;H7C0X4;C9J7S5;Q92685-2	Dol-P-Man:Man(5)GlcNAc(2)-PP-Dol alpha-1,3-mannosyltransferase	ALG3
1066896512	1030394496	134282336	1419799808	1344278784	1177871872	988732864	1135655424	1385981184	1032568064	1256068096	1027660032	824907968	1157565568	1339526912	1274617984	876395072	942244672	1178129664	1022772544	644361536	878263680	1369426048	912240256	626414400	981937408	625992512	609595712	561375040	791634816	789460480	675564736	1092269568	1108594048	959217664	787865984	11	11	11	36946	0	50052	Q9Y673;Q9Y673-2	Q9Y673;Q9Y673-2	Dolichyl-phosphate beta-glucosyltransferase	ALG5
475658912	385121568	637743296	421672352	495633376	294369408	265615424	187339952	252756544	176233216	199346864	247402176	192525264	147467712	483832480	225260896	249508256	235280304	233712112	216707552	246243456	23712056	157086544	26315992	119519400	145846032	83808216	13735674	95438344	146124336	45620704	83557016	122705568	106307976	161984336	139263744	8	8	4	5818	0	36263	Q9Y672;A2A2G4	Q9Y672;A2A2G4	Dolichyl pyrophosphate Man9GlcNAc2 alpha-1,3-glucosyltransferase	ALG6
16228511	151195312	139633680	148325888	15930055	11895405	156430784	144333568	149316272	121254880	12561415	150681936	45385484	162328560	120316448	138929856	70379776	42205376	115809808	168815952	162497216	11954652	11948744	156295696	151725184	146957600	148430864	162707760	156197712	155916176	165392944	14635192	141588096	121333160	124168616	134810208	2	2	2	60087	1401	30107	Q9BVK2;H0YDQ1;H0YDD3;Q9BVK2-2	Q9BVK2;H0YDQ1;H0YDD3;Q9BVK2-2	Probable dolichyl pyrophosphate Glc1Man9GlcNAc2 alpha-1,3-glucosyltransferase	ALG8
86023672	8743134	116067216	90864656	167195472	89298792	158651328	26467400	14064149	99270096	146699376	55367580	181888528	57994736	63932480	143300176	65190264	137500992	176025168	51342768	122471480	131522328	125476504	130164240	95498128	152117152	143888096	14406612	91317312	121365472	11292704	98970832	48215536	114274096	122993352	128187520	5	5	5	69863	0	21183	Q9H6U8;A0A087WZ62;Q9H6U8-3;H0YCW6;Q9H6U8-2;Q9H6U8-4;A0A087WTZ3;A0A087WVC0;A0A087WZY8;A0A087WV58	Q9H6U8;A0A087WZ62;Q9H6U8-3;H0YCW6;Q9H6U8-2;Q9H6U8-4	Alpha-1,2-mannosyltransferase ALG9	ALG9
7551808	73547032	0	0	0	0	46599712	52379160	0	0	0	71446752	0	0	45539100	0	0	44234984	0	0	0	0	0	6511126	0	53057088	0	76260360	0	0	0	62653424	0	77637712	8644224	0	3	1	1	12055	44524	43916	H0YJF3	H0YJF3		ALKBH1
15104895	0	0	8462373	76028416	12170526	14542813	36900584	99277488	119812560	86388200	7034046	19128104	96122976	24110396	50431136	25569786	59749188	38697244	63570576	132069056	76336096	9822334	80667640	81590600	97881808	58285224	97987256	123364632	8462196	416524000	103567056	25086632	118142600	101871952	149329232	5	5	3	43831	0	18311	Q13686;G3V4M4	Q13686	Alkylated DNA repair protein alkB homolog 1	ALKBH1
92365408	100806360	91556720	222522752	105982944	189752736	95852568	91655504	113423248	78209856	108416896	196962304	12880557	108147664	166785088	143306144	147992944	154487904	80776768	63619120	80766560	172344592	124134080	0	338967840	211483312	359982688	29093848	370008416	285303680	262388064	387367392	224364544	370594368	355263936	293840992	6	6	6	29322	0	91022	Q6NS38;F5H5X2;F5GZZ0;S4R3T5;Q6NS38-2	Q6NS38;F5H5X2;F5GZZ0;S4R3T5;Q6NS38-2	Alpha-ketoglutarate-dependent dioxygenase alkB homolog 2	ALKBH2
0	0	0	0	0	0	0	0	0	0	0	0	0	0	0	0	0	0	0	0	0	0	0	0	24347556	26268292	16217469	34759416	33026900	29531940	0	43720096	36826956	3690493	37804536	47332816	1	1	1	33374	19257	26782	Q96Q83;H0YDH4;E9PSA5	Q96Q83;H0YDH4;E9PSA5	Alpha-ketoglutarate-dependent dioxygenase alkB homolog 3	ALKBH3
373096384	324556352	349334688	477672928	459422752	449119104	457622592	31194792	42341616	457179712	408765920	371735488	382797056	349055552	361169120	396680896	242176304	332848384	299190912	257801488	295650720	276158240	164653376	227184784	363240640	312199648	29842824	390681440	245310224	256799840	248834560	226178848	168523536	205365328	207517024	225215152	7	7	7	33837	0	97988	Q9NXW9;Q9NXW9-2	Q9NXW9	Alpha-ketoglutarate-dependent dioxygenase alkB homolog 4	ALKBH4
1635017856	1525772544	1556434560	1600437888	1379132928	1329526272	1531866880	1342753280	1158108416	1458263936	1487132928	1431215872	2368994048	1924966400	2065138176	193477760	159372816	1529693184	1527352832	1549192192	1475602560	1488453504	1555071488	1423214848	1882159616	222512176	2066892928	1780060672	1403931520	1871274752	1879402112	174088208	1537008768	1475212800	1632752768	1497852800	12	12	12	44255	0	91365	Q6P6C2;Q6P6C2-1;Q6P6C2-3;K7ER58	Q6P6C2;Q6P6C2-1;Q6P6C2-3	RNA demethylase ALKBH5	ALKBH5
1297800320	666729152	7874811	699791872	743467904	596805376	731658496	1147734016	1536362880	186512736	402823968	106044800	820906816	823242880	579113088	704973184	590365568	14981673	678517248	869681024	1011508736	796451328	529943648	400626560	1562650880	1219827584	1977372928	1344874496	1366975872	1488552320	1708348032	192280112	1717008256	1821244672	2382705152	1978024320	7	7	7	24516	0	46965	Q9BT30;M0QZH2;M0QZI0	Q9BT30	Alpha-ketoglutarate-dependent dioxygenase alkB homolog 7, mitochondrial	ALKBH7
78115096	65951548	233357296	188883824	228544384	188300224	161427376	191187328	206807376	233169216	209489152	238585712	178864784	211286272	17688606	191196048	157261984	157389312	19725798	192444528	143024592	158979184	116711992	128595560	63628748	96447040	53442544	115447480	70349816	79022384	86190544	113337632	71964728	78614032	86352496	83132728	7	7	7	75208	0	34136	Q96BT7;Q96BT7-4;C9JQN2;Q96BT7-3;Q96BT7-2	Q96BT7;Q96BT7-4	Alkylated DNA repair protein alkB homolog 8	ALKBH8
742315264	53021304	59826412	446192416	563840640	466364768	326657792	489538528	482042144	292777088	290044608	329618720	533518080	728681088	718064960	788940096	415658624	558955136	694742592	390802304	332714784	467661760	660399	11118496	72517784	0	18063528	68483416	7578096	39419080	55410280	0	0	0	0	79470392	6	6	6	80355	16592	82889	O75342	O75342	Arachidonate 12-lipoxygenase, 12R-type	ALOX12B
0	0	0	0	0	0	0	0	0	0	0	0	0	0	7910988	0	12715346	0	6066791	0	23458676	0	0	0	1229262	0	0	0	0	0	0	0	0	0	10896646	0	5	5	5	75856	0	17031	O15296;I3L1D5;O15296-4;O15296-2;O15296-3	O15296;I3L1D5;O15296-4;O15296-2;O15296-3	Arachidonate 15-lipoxygenase B	ALOX15B
768000256	41170432	497721792	57943576	48662900	420386944	299267008	435678560	191651536	362121184	281946816	365962784	496114144	402376256	506236640	445158784	369121504	37384932	352214368	406277184	240933728	166971632	201745840	256927616	56798224	566805888	589650240	703739776	481403648	432497504	532298432	307762464	44048824	244033216	394117056	399183840	18	18	18	77982	0	12649	P09917;P09917-2;P09917-3;P09917-5;P09917-4;A0A087X109	P09917;P09917-2;P09917-3;P09917-5;P09917-4	Arachidonate 5-lipoxygenase	ALOX5
808144576	8022561280	9535744000	9233355776	6271286784	8930642944	793506624	8455118848	9584877568	9710794752	9130151936	9438750720	738321280	1142234624	9910038528	1012786496	9766152192	1149573632	8382607872	8167130624	1145019904	5176230912	1029923520	1091396992	1397340544	1671596160	124367536	1732582144	1299851136	1127342080	1452788352	1655759744	1548260352	1817213056	1853995392	1246353792	4	4	4	18157	0	14345	P20292;A0A087WW23	P20292;A0A087WW23	Arachidonate 5-lipoxygenase-activating protein	ALOX5AP
16300368	7811539	0	0	0	0	0	0	0	6340421	41556228	11349936	42387112	5506094	14798402	2701529	24047584	36319096	11556016	0	9317758	7756496	23071736	19731812	0	0	0	0	0	0	0	0	0	0	0	0	2	2	2	57304	57554	18478	P05186;P05186-3	P05186;P05186-3	Alkaline phosphatase, tissue-nonspecific isozyme	ALPL
6288969216	6947779584	6991510528	8268086272	9012235264	9135230976	7839770624	8340337152	9939715072	1087243264	9825788928	1082275328	1138022912	6928192512	1018133952	1056181568	9547056128	1101223424	9078775808	9585313792	6723296768	1138042112	1533060224	1176394240	1187832832	139510864	1020193408	9058734080	1439729152	1064290560	110576704	1457623040	1352690304	1253763200	1398625536	1149534080	12	12	12	27557	0	32331	E9PB61;Q86V81	E9PB61;Q86V81	THO complex subunit 4	ALYREF
55340572	52364068	59186944	52604048	67514328	71009552	75521368	723598	153092112	12034843	102659352	129070328	37332504	67140496	53540388	59141464	69200944	113771320	42789036	63163584	92440312	10163106	61665196	38755700	39205608	85161952	56458408	112460752	91297352	50137376	62876336	136094112	84447848	81653144	171537840	47686084	18	18	18	14251	0	1865	Q9C0C7;A0A075B6T1;Q9C0C7-4;Q9C0C7-2;Q9C0C7-3;Q9C0C7-5;Q9C0C7-6;H0YE34	Q9C0C7;A0A075B6T1;Q9C0C7-4;Q9C0C7-2;Q9C0C7-3;Q9C0C7-5;Q9C0C7-6	Activating molecule in BECN1-regulated autophagy protein 1	AMBRA1
122418376	105865056	167329264	189163216	477146848	127515752	25842628	83144840	137920992	434463648	365278176	47789016	163733824	138541472	85447776	1216068	10947686	401864864	109558648	109115064	161682032	287242080	294950784	135054800	97713376	122043200	208531520	103993648	110186744	37431872	303049056	289172384	128624144	137890736	246601328	140697296	5	5	5	43747	0	12888	Q9Y303;Q9Y303-2;Q9Y303-3;H3BQ15;H3BTZ6;H3BSV9;H3BSD5;H3BTE3	Q9Y303;Q9Y303-2;Q9Y303-3;H3BQ15	Putative N-acetylglucosamine-6-phosphate deacetylase	AMDHD2
151892912	118216576	115523784	105765704	94485744	101804600	230455264	223148368	134882000	228592816	193035232	237791904	129227312	193209504	179097488	176475840	194882608	195237440	151579040	162255472	302273696	253745664	353217120	369260288	283316672	266340576	223997152	237340144	221472432	175728496	396361472	308351168	430049664	256441424	395982912	445389088	15	15	15	72995	0	32331	Q9UKV5;H3BRK9;R4GNG2;H3BSK3	Q9UKV5;H3BRK9;R4GNG2	E3 ubiquitin-protein ligase AMFR	AMFR
32383518	22822994	15461887	2267619	46014152	34172692	0	29435016	22342932	14989331	61829544	14044526	11016738	13812252	0	0	10318491	0	11311173	26847948	6088583	13722973	8964345	11266474	68862056	51696164	54278488	29811514	0	0	25310760	4367125	58657416	20359452	24747456	48701400	4	3	3	35463	15868	65151	Q9Y4X0;Q9Y4X0-4;Q9Y4X0-3	Q9Y4X0;Q9Y4X0-4;Q9Y4X0-3	AMME syndrome candidate gene 1 protein	AMMECR1
591168256	583270400	592365312	634620224	688112384	64868500	662279616	685273728	612508672	441587552	496078016	379181888	772750656	380649760	588152960	494622176	552113536	452504192	487870688	480404352	322365728	45393120	64730072	140334192	351783104	376839360	643108736	44011468	352103296	388860192	279882976	340113216	444007744	324444064	325475232	293400096	5	5	4	34499	16493	80353	Q6DCA0	Q6DCA0	AMMECR1-like protein	AMMECR1L
281338176	300833184	315629856	32262832	324341856	2382597	199381664	214109888	187154624	328595232	219590832	288030336	30276226	336882432	315375040	457288736	260050304	369992000	311631168	200565520	257011728	258208000	273989344	176397184	459674816	41573136	449398368	568994560	432103	279422272	412684800	422343808	318658112	38499968	395517728	41467040	15	15	15	10069	0	38083	Q01433;Q01433-2;H0Y360;Q01433-3;Q01433-5;Q01433-4;H0YCL9;E9PIJ1;E9PJF6;H0YF16	Q01433;Q01433-2;H0Y360;Q01433-3;Q01433-5;Q01433-4	AMP deaminase 2	AMPD2
177758256	162387280	177100336	80564520	89488352	48231888	79675872	81222640	76502024	49457668	70973448	63774832	119552104	203876928	151121552	185782176	110779224	135991536	116574912	121926536	86944624	65380448	107015040	53805676	46155944	29551652	10790863	12443035	55772680	6400318	27954220	42415668	50325704	66324904	80794240	3909891	11	11	10	88811	0	37346	Q01432;Q01432-5;Q01432-4;E9PKC5;Q01432-6;Q01432-3;E9PIR5;E9PLK6;Q01432-2;P23109;H0YDC3;E9PPG2	Q01432;Q01432-5;Q01432-4;E9PKC5;Q01432-6;Q01432-3	AMP deaminase 3	AMPD3
0	39462112	0	47904932	0	0	0	0	0	0	0	0	0	0	0	25013168	0	0	47048072	0	0	0	0	0	75276352	0	0	0	98729624	9384243	0	0	113152	102429040	0	0	2	2	2	41263	68751	1754	Q86W34;J3KSH1;J3KS38;J3KRS2;J3QLK6;J3KTM1;J3KRD0	Q86W34;J3KSH1;J3KS38;J3KRS2;J3QLK6;J3KTM1;J3KRD0	Archaemetzincin-2	AMZ2
391447616	316236704	33416422	369586976	445504736	418381856	405941888	476715456	456390048	551214208	404561280	518191744	426998528	387973536	471492224	3535323	41512648	394063008	399848096	367821088	34830824	354265568	472557504	38607520	472126496	447149760	416991936	465468224	522436416	514066944	527723776	548877312	421204416	493284928	557399872	557426240	33	33	33	2165	0	15297	Q9H1A4;H0Y564;F8WAS1	Q9H1A4;H0Y564	Anaphase-promoting complex subunit 1	ANAPC1
27052592	31429420	0	38042192	6235085	60883004	104288208	59101684	35454248	71515352	44105656	54904980	0	59211928	0	0	30821768	58497716	0	29758020	5163669	55773012	143551120	0	0	0	31772834	0	0	48675064	63611444	51743496	55509112	46857932	129921328	19658844	3	3	3	21252	67532	17625	Q9UM13;D6R9Q5;D6RD74;D6RA92;D6RB36	Q9UM13;D6R9Q5;D6RD74;D6RA92	Anaphase-promoting complex subunit 10	ANAPC10
0	0	0	0	0	0	0	0	0	0	0	0	0	0	79557024	0	9514334	82358368	131061432	0	127529576	0	0	111772752	132898088	86384568	50346612	139424624	277726848	187556928	317223552	140562208	158793248	190202336	304663840	17064666	2	2	2	76293	55104	18948	F5H2T3;F8WDQ6;F5H3R3;F5H6E4;G5EA39;P60006;P60006-2;F5GXB9	F5H2T3;F8WDQ6;F5H3R3;F5H6E4;G5EA39;P60006;P60006-2;F5GXB9	Anaphase-promoting complex subunit 15	ANAPC15
0	0	0	0	0	0	27265780	163080592	0	0	36864856	0	0	0	1839589	0	0	0	72903624	0	0	0	136975904	47378080	54188516	130093928	118721152	161552192	72924280	197209440	238920848	0	12674152	95610040	32913208	0	2	2	2	11667	15349	53782	Q96DE5;A0A087WUN5	Q96DE5;A0A087WUN5	Anaphase-promoting complex subunit 16	ANAPC16
35793360	385510400	35855380	348580256	373868672	3670774	510905376	489110112	448079456	479726976	469471552	387951040	343421984	363061664	524956192	383588608	521728064	390837312	415696128	319304864	575270336	327980544	318497664	384623232	246701584	44218732	367195392	448302400	422859104	334659424	587889920	486602336	510614272	509311392	567177536	476267328	19	19	19	93827	0	22819	Q9UJX6;Q9UJX6-2	Q9UJX6;Q9UJX6-2	Anaphase-promoting complex subunit 2	ANAPC2
307349280	15237895	170883072	172762384	211966544	187480016	182306944	11584883	190068960	200077184	185768832	122360344	146977520	154391552	126294296	97411856	196507120	160554368	282350400	199151936	201856224	237921120	186526640	155060128	238546848	234458752	199545856	224904688	206741280	176641776	214233152	204876352	188796256	161224960	144652112	218670256	14	14	14	92115	0	86185	Q9UJX5;Q9UJX5-3;Q9UJX5-2;D6RAP6;D6RFM7	Q9UJX5;Q9UJX5-3;Q9UJX5-2	Anaphase-promoting complex subunit 4	ANAPC4
294336224	240362528	263225408	356812928	286468512	439613152	343956608	248724576	274714912	432009536	498890016	405042048	252841104	351939776	292977120	265455552	297825024	397488864	303974208	386823808	320837408	338556128	245614976	209279648	39659288	447792352	418572320	455770432	456505472	443302880	513846464	463261984	518918336	42379	355500256	440916992	20	20	20	85076	0	76446	Q9UJX4;F5H0F9;Q9UJX4-3;F5H0N1;H0YFB5;F5H3S5;F5GY68;Q9UJX4-2;F5GZ05	Q9UJX4;F5H0F9;Q9UJX4-3	Anaphase-promoting complex subunit 5	ANAPC5
282125728	365134080	303777728	349251712	46116908	355868832	529222976	35216248	470281472	375977184	334423808	328230624	430927904	446396704	363249248	369515008	441223072	347110336	47959812	51701456	393179648	378575424	499389632	4481275	968388096	925759232	1028540480	1096272000	1163499136	1254470400	1118530304	1238588672	1505939072	1235003392	126082152	1408961536	17	17	17	66855	0	48827	Q9UJX3;Q9UJX3-2;H0YIW2;H0YIX7	Q9UJX3;Q9UJX3-2	Anaphase-promoting complex subunit 7	ANAPC7
41987408	761366	7836933	39173576	33237212	23712408	47091712	2030499	2758895	40017916	0	0	0	38024680	0	0	1834986	31129652	5408465	0	23508416	43882856	54896212	34736976	26096404	77165032	56360200	42163452	28571208	31748568	82237304	43442660	0	22394904	2603117	53477080	5	5	5	62338	15518	57349	Q5VTE6;Q5VTE6-2	Q5VTE6;Q5VTE6-2	Protein angel homolog 2	ANGEL2
243670800	260216560	305315296	296384672	246499440	287461312	266037440	257509376	752479552	304170592	327397280	200954160	575180800	219577360	281822368	271787712	310522112	863292096	211196224	260984864	162612560	592707200	156816896	175124720	161174576	133588696	189367024	89260104	216702704	173460592	186082304	208918208	186811456	172340880	181678000	164797280	19	19	18	1284	0	13236	Q9P2R3;Q9P2R3-2;Q9P2R3-4;I3L3P8;K7EPT2	Q9P2R3;Q9P2R3-2;Q9P2R3-4	Rabankyrin-5	ANKFY1
0	0	0	0	0	0	0	0	0	0	0	0	0	0	0	0	0	0	0	0	0	0	0	0	0	0	0	0	0	0	21818444	28331512	0	19256862	0	24993664	4	1	1	37524	1	-2	D6RHC4	D6RHC4		ANKHD1
10150527	861574	4676995	10105646	8850839	8951664	9985773	8028956	0	8149568	10892717	5477878	0	0	0	0	0	3917445	5194665	0	0	0	0	0	0	0	0	5746068	0	0	0	0	0	0	0	0	23	1	1	16674	1	-2	E9PDP5;H3BLS9;H7C2F5;Q8IWZ3-2;Q8IWZ3-5;Q8IWZ3-3	E9PDP5;H3BLS9;H7C2F5		ANKHD1
233381088	284042688	21147712	234550976	366527232	368873536	447266016	343397760	326695072	377315712	414720640	399298592	299893728	323158688	266319424	288437344	314067104	372912992	299477472	285515424	368368480	371821792	39953856	315191136	21171496	215790240	199452608	212968848	225673632	254389776	265033056	296512064	266429728	277037088	253241024	245749232	36	36	14	27717	0	32331	Q8IWZ3-6;Q8IWZ3;Q8IWZ3-4;H0Y4P6;H0Y785;H0Y472;H0Y7Y3;A0A0A0MQZ8;H7C0V5;H7C2E1	Q8IWZ3-6;Q8IWZ3;Q8IWZ3-4	Ankyrin repeat and KH domain-containing protein 1	ANKHD1
0	0	0	0	0	25807848	0	0	0	0	318596	0	0	132180544	146340336	149160496	8696315	88541216	0	0	75496512	113736784	0	86610256	70210728	17971804	0	6857266	55383408	54514408	556808	5406236	54013032	61042232	64930036	63546592	3	3	3	122	85592	33967	Q9P2G1	Q9P2G1	Ankyrin repeat and IBR domain-containing protein 1	ANKIB1
1074723072	1048098048	1000002176	721254400	3788329728	5129198080	3354450176	7178395136	4698493952	4684510720	33588412	4163454208	4304960512	7833449472	5327036416	8145344000	4710077952	6354831872	3753512960	6459008512	3182998272	3303971584	3800208128	3248176640	9227300864	9558673408	1057538752	8435829248	6935077376	612489280	7600450048	7576687616	5437068288	6274114048	7054720512	3670575104	18	18	18	10411	0	65166	Q86XL3;Q86XL3-2;Q86XL3-3;F5H6J0;F5H1D4	Q86XL3;Q86XL3-2	Ankyrin repeat and LEM domain-containing protein 2	ANKLE2
160423040	114412720	114821336	147377440	165481792	187788096	201988608	219239472	183706768	234978640	279460512	201134464	15854139	110936624	114425296	109022760	204015856	157130608	172807520	17048788	116511656	190809824	175939024	61998388	113239592	81167256	87681392	94241776	95590936	98502080	8305922	74393144	195808800	80009216	133734272	85191256	5	5	5	49298	0	17327	Q8IV38;G3V0G5;F8WB95	Q8IV38;G3V0G5	Ankyrin repeat and MYND domain-containing protein 2	ANKMY2
326070976	112449760	287257280	215907040	303541472	34149504	502966880	382694464	357890048	42709644	416848448	518329280	509139136	532017760	605943488	52039320	447055520	755959232	370060960	347415456	686179264	640792640	168133392	28194568	15274381	142734560	16183535	0	0	0	0	165948960	0	0	241593216	44596928	2	2	2	17031	0	17723	Q8IUW1;Q9NXR5-2;Q9NXR5	Q8IUW1;Q9NXR5-2;Q9NXR5	Ankyrin repeat domain-containing protein 10	ANKRD10
141321	1829329	153744	5162082	4220012	4439706	11423339	2225797	2091329	14183053	7494938	6540983	7805927	3140204	5789601	2334888	6166009	3696363	1223072	2432435	4480934	3373174	18342	3615556	0	0	0	0	19014108	14404071	10428189	14050411	20118932	11489352	21723616	14241964	5	5	5	29791	0	88354	Q6UB99	Q6UB99	Ankyrin repeat domain-containing protein 11	ANKRD11
5477685	11141953	0	28846114	0	16471042	0	0	0	4005704	0	16465503	0	24765262	34278152	28980408	0	11987258	15126843	0	4268802	0	0	1310727	1253895	5149319	2789672	14142709	2000788	2555514	7478385	1982876	13485257	11825274	13022015	22108142	4	4	4	23565	34565	21172	Q6UB98;Q6UB98-2;A0A0A0MRY7	Q6UB98;Q6UB98-2	Ankyrin repeat domain-containing protein 12	ANKRD12
876949120	889014144	799574144	866113920	79793920	674741248	901277440	862130816	740758656	849176832	854120128	861076672	1139327872	909638848	1041755520	879916608	124560144	1024902272	919405248	1136953472	811770368	825687168	937953920	868264768	1456267392	1573443584	1353317632	1469120384	1199429120	1357587072	1202210176	1009763584	1108871040	1354602624	1258187648	472267328	9	9	8	67618	0	66224	Q8IZ07;H0YIN8;S4R3U2;S4R3D2;F8W150;Q6ZTN6-2	Q8IZ07;H0YIN8	Ankyrin repeat domain-containing protein 13A	ANKRD13A
29376868	4995189	14392487	10510938	5581495	14992048	11694165	11372572	3738134	17401444	3224418	104635896	4423507	438171	4110634	12741076	134889	14546913	49177	10192452	243021	12586323	13993639	0	0	0	0	0	0	0	4039456	0	0	0	0	0	4	3	3	68171	71746	35179	Q6ZTN6-3;Q6ZTN6;A0A087WYW0	Q6ZTN6-3;Q6ZTN6	Ankyrin repeat domain-containing protein 13D	ANKRD13D
51383080	57956860	52782240	50050548	59156208	50090424	83775960	50118064	86920504	72239152	75765176	3974494	53272052	3788836	40663196	42750820	69947992	53110392	679507	54273920	78439856	74865048	79284872	83710736	59326632	56335596	50636600	66046252	80387504	115041568	110777776	123275544	127028344	127791032	86860184	121141976	29	19	19	27425	0	11453	O75179;O75179-2;H0YM23;O75179-7;O75179-6;H0YLQ3;O75179-4;O75179-3;O75179-5	O75179;O75179-2;H0YM23;O75179-7;O75179-6;H0YLQ3;O75179-4	Ankyrin repeat domain-containing protein 17	ANKRD17
100442472	59846928	76839224	82260728	76897984	79878272	72576480	64041892	83849840	87863400	79302368	67034856	79110112	93568648	96312736	93850576	11372806	115384192	120197120	56911964	96669552	98604128	88327456	88035928	26540576	19533184	16297262	19541020	24368962	25213206	31449016	26681702	3987589	24862684	24211516	31525376	11	11	11	11698	0	90832	Q96NW4;K7ELM1;V9GYL8;A0A087WX52;K7EIN0;K7ENE0;K7EIH4	Q96NW4;K7ELM1	Ankyrin repeat domain-containing protein 27	ANKRD27
171133520	108416896	247702992	172396768	217089920	258425632	266212720	119424336	116626728	272957952	209799920	254164208	123217688	89775680	103555904	181590512	211786400	263745792	132720504	208359104	225238880	225342912	182913360	170368080	107575184	128431216	89753840	87228408	131203456	134620272	11769183	17156228	106287384	169677232	18269896	172655472	12	10	10	11296	0	34747	O15084;O15084-1;O15084-4;O15084-2;B4DIW9	O15084;O15084-1;O15084-4;O15084-2;B4DIW9	Serine/threonine-protein phosphatase 6 regulatory ankyrin repeat subunit A	ANKRD28
12318239	18453736	0	10683519	0	2103527	0	0	0	0	0	7092733	0	8829039	1627919	9235826	0	5460773	6343479	0	8751148	5427831	6841978	11062877	61829628	0	56841816	5099061	27150300	41118220	1455636	27654084	0	24781348	3678472	31846404	3	3	3	15805	1	-2	Q9BXX2;Q9BXX2-2	Q9BXX2	Ankyrin repeat domain-containing protein 30B	ANKRD30B
0	8802375	0	0	10332741	0	15711505	14444844	43552740	4250184	56401064	54074752	8120184	16745835	13887124	0	21097416	21759612	0	20968506	38458064	28663724	1958785	25038978	0	0	15253643	13847237	21320300	173684	0	0	18035398	24986680	34613636	22602262	3	3	3	53974	0	80512	A6NCL7;D6R912	A6NCL7	Ankyrin repeat domain-containing protein 33B	ANKRD33B
688852	17668576	10245061	9032412	8917222	10142699	21820680	24318532	27391804	18101656	27233744	13840691	16117237	13182326	0	610207	10832802	6284519	16016665	21080194	4187679	7411606	11337095	5148366	48356664	15663711	19932900	15193891	10459756	13347378	0	0	15383808	1801201	13207072	14675827	3	3	3	19975	71572	34748	Q5JPF3;Q8N2N9;A6QL64;Q8N2N9-3;Q8N2N9-2;A0A087X1R3;Q5JPF3-3;A6QL64-3;Q5JPF3-2	Q5JPF3;Q8N2N9;A6QL64;Q8N2N9-3;Q8N2N9-2;A0A087X1R3;Q5JPF3-3;A6QL64-3;Q5JPF3-2	Ankyrin repeat domain-containing protein 36C;Ankyrin repeat domain-containing protein 36B;Ankyrin repeat domain-containing protein 36A	ANKRD36C;ANKRD36B;ANKRD36
913285568	917535936	1128073856	1197423360	496833664	788345152	414560064	644582912	382621120	700031616	341273216	503257600	870738368	791402688	710739584	841096064	575977088	402842112	843923264	557346560	721848960	348244544	490358848	421339008	271876736	236468560	60352648	536538816	576738432	462367360	3792388	549717184	398086048	353853056	587507648	555149888	20	20	18	1076	0	99124	Q8N8A2;Q8N8A2-2;Q8N8A2-4;H7C209;Q8N8A2-3;H7C4A0;Q8N8A2-5;H7C3P1;C9JY51;F8WBW3	Q8N8A2;Q8N8A2-2;Q8N8A2-4;H7C209;Q8N8A2-3	Serine/threonine-protein phosphatase 6 regulatory ankyrin repeat subunit B	ANKRD44
956576384	49926016	24204168	0	62038512	67146312	96825608	61672160	82296488	69496648	72632096	68275600	48110904	64756840	4408243	48149216	53460504	0	45412168	0	8015222	78957816	67806008	7442901	0	0	0	0	15865638	9290263	131075408	0	10311085	16023668	0	0	2	2	2	25966	92013	15815	Q86W74;E5RHV2;E5RI20;E5RFM7;E5RI04;J3KP26;Q86W74-2	Q86W74;E5RHV2;E5RI20;E5RFM7;E5RI04;J3KP26;Q86W74-2	Ankyrin repeat domain-containing protein 46	ANKRD46
0	0	0	0	0	6364661	0	0	0	0	2638577	0	0	0	0	0	0	0	0	6382397	0	0	0	0	7060514	0	0	15909404	0	0	5680894	8079782	0	5046886	6983652	0	2	2	2	15586	14023	30258	Q9ULJ7;Q9ULJ7-2	Q9ULJ7;Q9ULJ7-2	Ankyrin repeat domain-containing protein 50	ANKRD50
0	0	0	7436135	5284844	20400082	40908672	26758492	16390679	40259676	47410764	21706052	20854556	12214815	15242022	12612543	15827333	13404392	13743446	6221069	38644856	1300376	2038628	3138968	1453898	0	4597555	6643931	1059614	8835064	25000376	10447176	14129884	32677916	30872728	12842973	6	6	6	11508	0	12991	Q8NB46	Q8NB46	Serine/threonine-protein phosphatase 6 regulatory ankyrin repeat subunit C	ANKRD52
0	0	0	0	0	0	0	0	0	0	0	0	15666109	0	0	0	0	0	0	0	0	16715735	0	84808808	0	0	0	0	53589756	87206248	113801848	0	70862424	68620960	0	53858780	1	1	1	32505	57539	18433	Q6NXT1;C9JU48;D3YTC9	Q6NXT1;C9JU48;D3YTC9	Ankyrin repeat domain-containing protein 54	ANKRD54
104601040	50562836	89550264	85294376	167564656	94172832	87398472	150470928	171016384	85540744	86954640	179065360	90829168	146435632	72454272	95277008	60907104	158634800	33449992	78968600	151593680	198122352	109046376	69691928	26323252	290453888	284130048	327591584	36098636	346532000	334521504	36008256	430112416	364950720	357308832	305792096	12	12	12	12311	0	42494	Q92625;Q92625-2	Q92625	Ankyrin repeat and SAM domain-containing protein 1A	ANKS1A
528363296	496004096	60237312	493310560	487884576	425659104	368081536	419394400	335169888	357324032	310699072	346173536	648802432	695011072	651478976	653282752	460339072	315557152	454886400	438201120	484088352	54094076	1823245312	388054400	382084736	415154400	422267392	30867124	309213792	276830496	396817984	318605600	20431386	211643024	195721040	216881200	12	12	12	80926	0	11964	Q9H8Y5;B8ZZS4;C9K022;C9JQZ3;C9JS61	Q9H8Y5;B8ZZS4	Ankyrin repeat and zinc finger domain-containing protein 1	ANKZF1
12365353	124474832	158612672	117533472	138503712	14540081	158043888	172158192	126585592	116442912	109764344	87872448	144275920	1002327	139335120	97149680	107898664	122923184	113209816	143296720	95590744	9061624	13971272	140650448	25922506	59958604	53731092	49743968	74884632	81057568	55610416	49301068	88521968	5636339	90518336	49089284	18	18	18	1242	0	53051	Q9NQW6;Q9NQW6-2;H7C1K5;H7C3S1;H7C1C2;C9JJT6;H7C167	Q9NQW6;Q9NQW6-2	Actin-binding protein anillin	ANLN
43867672	66352772	90689088	54159356	5315921	73487608	57440780	44763612	36172728	17222398	0	24719176	60224276	67441232	63918016	53369600	53147404	55648048	89407720	46475972	57659936	78242176	50613612	54313692	29656956	31962120	25564372	159082	2147602	41707728	28774484	40941944	62246792	42557616	37353136	27548640	10	10	10	10616	0	15697	Q4KMQ2;Q4KMQ2-3;Q4KMQ2-2;Q4KMQ2-4	Q4KMQ2;Q4KMQ2-3;Q4KMQ2-2;Q4KMQ2-4	Anoctamin-6	ANO6
3901216256	4094206208	3662792960	4210167296	4056320256	4188636928	3530704128	40366036	3828240640	350108000	3677051648	3547360256	4191729664	4063022592	4029671680	4441774592	3895785472	370133376	426150752	3723261184	3342359296	3118463488	3253385472	3137822464	4780132352	5249970688	4831387136	4465590784	4432804864	4385004544	4014942976	4167394816	3755170304	3839159040	3688799488	4070882304	16	16	12	28585	0	30066	P39687;H0YN26;H7BZ09;O43423	P39687;H0YN26	Acidic leucine-rich nuclear phosphoprotein 32 family member A	ANP32A
1020710080	8745970688	7248441856	9812170752	8802223104	9916284928	9754126336	9693461504	1033808640	1074976256	1115897856	1033834432	1017617536	7977453568	9808286720	1026912256	9918449664	1035465472	1044000768	1070210368	8009366528	8859907072	9468530688	7695886336	8923373568	8305623552	883243264	9190033408	8636282880	8527894528	850936960	7539518464	8017486848	686315072	8523077632	977082176	8	5	5	28787	0	1751	Q92688;Q92688-2	Q92688;Q92688-2	Acidic leucine-rich nuclear phosphoprotein 32 family member B	ANP32B
170432880	1092206208	541145088	1761206400	2622320128	24565236	1264473472	1109550592	1223952512	1087256960	111660088	731953536	993606336	1269435136	1937946880	1483994368	1887702528	991302208	1783589376	718150720	1862646784	1757309568	2488954880	3769252352	3194679552	5958452224	40913572	4153132544	4037916416	330201184	3555372032	4018155008	4827814400	5179551232	4708554240	4264457984	8	2	2	30692	0	29949	Q9BTT0;Q5TB19;Q9BTT0-2;E9PLC4	Q9BTT0;Q5TB19;Q9BTT0-2;E9PLC4	Acidic leucine-rich nuclear phosphoprotein 32 family member E	ANP32E
1110946816	8215632384	6320716288	7280101888	6419917824	7472599040	5975481344	6750188032	6193744384	7039597568	686340992	759483776	8595335168	7531611648	8923905024	7833677824	8654967808	7631319552	7701696000	848133824	7647565312	9243878400	8826967040	8102903296	1516496256	1717242112	1641931904	1575410816	1435640832	1484384000	1241177600	1220348288	1530944768	1957587584	1808728704	1673519616	10	10	4	25125	0	32331	Q9BTT0-3;E9PPH5;Q5TB25;H0YCE2	Q9BTT0-3	Acidic leucine-rich nuclear phosphoprotein 32 family member E	ANP32E
0	15827294	100237864	0	0	0	0	6066541	0	15766226	37881160	0	0	0	0	0	14717627	0	0	0	0	0	0	0	28495656	146329136	155219616	15203938	143095200	99437224	179421824	235899648	91893592	160368048	251232912	184778672	12	12	5	38714	0	10518	P04083;Q5T3N0	P04083	Annexin A1	ANXA1
4701609984	5366616064	4871855104	550649600	4847557632	4690531840	5915394048	5151143936	4210302208	4885578240	5156529152	5230954496	6762527744	6001001472	6278480384	6653494272	6013122048	6135026176	6080142336	4919638016	5368236032	4884766208	6154961408	6036741120	2438218496	1990625280	2277627136	2658316288	2190256896	243697024	2619915264	2207628288	1893568128	1585732608	1710638336	1888115328	18	18	18	54389	0	23323	P50995;P50995-2;H0Y6E1;P27216;E5RIN3;P27216-2	P50995;P50995-2	Annexin A11	ANXA11
1520410496	156200560	1546422272	1625942912	1530876160	1667999488	1546560000	1743427968	1588011008	1618581760	1690236800	1608673152	1541562240	1603793536	1509712384	1617864832	1879321472	1794916864	19593994	1968151680	1714198144	186610640	180349760	1610319232	6340295168	5671612928	6778241024	5989293568	5478494720	4948045824	5008852992	5349060608	6302798848	5756916736	5798733312	6333226496	27	27	27	38604	0	32331	P07355;P07355-2;H0YN42;H0YMD0;H0YMU9;H0YM50;A6NMY6;H0YKS4;H0YMM1;H0YKZ7;H0YLV6;H0YMT9;H0YKX9;H0YNP5;H0YKL9;H0YN28;H0YL33;H0YMW4;H0YKV8;H0YMD9;H0YNA0;H0YNB8;H0YKN4;H0YN52;H0YLE2	P07355;P07355-2;H0YN42;H0YMD0;H0YMU9;H0YM50;A6NMY6;H0YKS4	Annexin A2;Annexin;Putative annexin A2-like protein	ANXA2;ANXA2P2
332961056	392487328	376820256	220830352	207687120	325695296	281595648	268062704	263468640	277960032	347675008	351421216	349944384	390322496	387296736	434120160	32037624	267586	264939168	411484480	416706208	429279584	541059264	580225152	31976048	15630483	22721932	46544608	0	5012891	9833477	0	0	0	47882952	114828	10	10	10	35882	0	35973	P09525;Q6P452;P09525-2	P09525;Q6P452;P09525-2	Annexin A4;Annexin	ANXA4
0	27467204	38145908	0	0	0	28824922	3484006	0	0	43443308	0	0	0	0	3752285	0	0	0	0	0	0	21499832	0	73913120	0	103863160	0	52409120	0	0	0	70312536	115098432	0	0	17	1	1	29337	1	-2	D6RBL5	D6RBL5	Annexin	ANXA5
2339380224	2285883904	1778317184	1969415680	1796642560	1991470592	2045168384	2062323328	1678104320	1628596864	1569170560	1712162944	247046640	2392640512	2750116864	2579534080	2650178816	2301571072	2323956992	2369397504	1707915264	1862820352	2158315776	2163637248	3011319296	3376890624	3082033920	3354871552	2104622848	31258412	3081753344	2994918912	2353762048	2699745024	2528560384	2214249984	23	23	7	35936	0	32331	P08758;D6RBE9;E9PHT9;D6RCN3	P08758;D6RBE9;E9PHT9	Annexin A5;Annexin	ANXA5
41851248	34436036	5820578	38344312	53255800	49225552	42956560	46085436	45698620	67369016	72422608	72020920	46885572	6289298	487007	40374000	57413360	58219744	0	33652200	45032608	55669312	183080448	209508896	22882656	90852808	143632016	123994400	273652384	316641824	292744992	160556944	227177136	268782624	107668504	235529792	23	1	1	51776	0	44719	E5RK69;H0YC77	E5RK69	Annexin	ANXA6
5888798208	5073089024	4974468608	5412826112	3962990592	5224387072	3872090880	5267389952	4822303232	5635360256	4658216960	4457182720	5609492480	5037006336	5989040128	6040118272	52767928	5491890688	5453822464	5684955136	4386245120	48439312	5083929600	5167730176	6726428672	7605004288	7101450240	9146450944	8131102720	7606859776	7347257344	8657375232	6473530880	5974909440	6911260160	5975126528	38	38	16	75872	0	32331	P08133;P08133-2;E7EMC6;E5RK63;E5RJF5;E5RFF0;E5RI05;E5RIU8;E5RJR0	P08133;P08133-2	Annexin A6	ANXA6
1834808320	1762074496	2056006784	2670282240	2766082048	3157782528	4289302016	2916680704	2793261568	3445580800	3340714240	3999155200	3010238464	3537524992	2832674816	2817440000	3637754880	3363838208	2424104448	3267119360	3985874688	3997150464	4402164224	2935609088	1580630144	1832400512	1198034944	1806222976	1524546688	150404144	2108318592	1822670592	2045466880	1950757760	2078326144	228254512	16	16	16	52739	0	2118	P20073;P20073-2	P20073;P20073-2	Annexin A7	ANXA7
11829286	115976	23023286	11796021	22595432	8556892	0	5256788	11584567	18167282	10112991	0	7094217	6456261	16232253	11905229	7621615	865927	13455881	16833900	9241112	19262366	0	1886153	33467756	23536872	20528672	31344316	32957024	36730012	21314988	29153204	23549558	22413928	1969709	23810892	9	9	8	14792	15783	63067	Q06278;H7C3Q1;H7BXF7	Q06278	Aldehyde oxidase	AOX1
0	0	0	0	0	0	0	0	0	0	0	0	0	0	0	0	0	0	0	3056653	0	0	0	3890178	0	0	0	0	0	0	0	0	8270272	4858135	5572975	0	5	5	5	3428	0	10297	Q63HQ0;Q63HQ0-2	Q63HQ0;Q63HQ0-2	AP-1 complex-associated regulatory protein	AP1AR
4156555520	4372196864	4309100032	4403444736	4561366016	4513006080	4911574016	4780547584	448938240	4535378432	5107127296	4955925504	5012800512	4987702272	4830446592	4405045760	5014873088	5523743744	5707180544	4479521280	5417371136	5413319168	5635689984	5190711296	3031888640	364732544	3500734720	3944576768	2821688064	3104345088	3258668288	3678607872	4429834752	3239541760	3599732480	310946976	36	36	21	10464	0	32331	Q10567;Q10567-3;Q10567-2;Q10567-4;C9J1E7;H7C034	Q10567;Q10567-3;Q10567-2;Q10567-4;C9J1E7	AP-1 complex subunit beta-1	AP1B1
1565444352	1609680512	1796824704	2035763968	2160728576	1445959680	1727574528	1366908288	2088723200	1664076800	1568868352	720217408	1472352000	154967792	1669497728	1623725184	1374056704	1831368832	1766739328	1276315904	1996757888	1654308224	1399307264	1449975296	1141400576	1243168640	1326428672	1678351872	1062759296	1075382912	1159900416	1700660224	1562341248	1410973824	1369164544	1462032768	22	22	22	9135	0	31653	O43747;O43747-2;H3BNR4;H3BR36;H3BUN9;B4DGE1;H3BN71;B3KNW1;H3BNN2;H3BRM7	O43747;O43747-2	AP-1 complex subunit gamma-1	AP1G1
594590848	548058752	40493512	551022912	544081408	616648704	46458080	489429536	641584640	482894784	525432448	491430464	465936864	527606720	435326048	466186752	457369184	4548042	464284128	490493728	546894848	499552640	452097376	408792512	125720728	120694800	14891152	101937136	222101456	236833216	246242512	133649280	121955440	155578272	132839208	179129680	19	19	19	87116	0	12021	O75843;H0YJ08;G3V532;G3V3Z2;H0YJ47;G3V2V9	O75843	AP-1 complex subunit gamma-like 2	AP1G2
3655411200	4154939136	3755557632	399458656	4244075008	4043960576	4451901440	4208478208	4092999680	425706880	3944195328	3991426816	361440064	4204620288	3611718400	3101161216	3699699712	3728785920	3332302336	4037259264	3766430976	3833729536	3510460928	3858410752	2033589376	2188771584	1978878592	1936934400	2759251200	246681984	2104404992	2313390592	3081593088	2628798464	2500742144	2807719680	26	26	26	48586	0	15577	Q9BXS5;Q9BXS5-2;E7ENJ6;K7EJL1;K7ENA7;K7EQX3;K7EPJ8;Q9Y6Q5;Q9Y6Q5-2;K7ER75;A0A087WZX7;K7EJJ1;K7EQ90;K7EPR4;K7EMG5;K7EK69;K7ERH5;K7EL08	Q9BXS5;Q9BXS5-2;E7ENJ6;K7EJL1	AP-1 complex subunit mu-1	AP1M1
638617536	519775168	912913152	772694400	995533312	623828096	773049600	529753376	906681728	73561904	780675136	858056896	636330752	57602084	453320960	553182656	43606492	376618752	789727360	649289408	584475904	517585408	610163584	587058944	216438816	152235088	390494816	100010512	495170336	576967872	261142112	102648592	255035600	475106592	349154976	337699776	2	2	2	18733	18006	27998	P61966;H7C1E4;P61966-2	P61966;H7C1E4;P61966-2	AP-1 complex subunit sigma-1A	AP1S1
623858304	544831232	598335296	542152640	740458112	579666048	733040640	577787200	585483136	627745152	571484032	674486528	595190464	714895104	696128832	611487168	71138856	608492672	543367744	587190272	631964352	575668352	450273664	484163776	445970208	550890816	592720128	455410528	944375296	90186592	719914240	34618340	0	857068928	8276834	106850880	3	3	3	18615	44008	4068	P56377;H7BZG6;H0Y673;F6SFB5;A6NH01;A0A0D9SFP9;P56377-2	P56377;H7BZG6;H0Y673;F6SFB5;A6NH01;A0A0D9SFP9;P56377-2	AP-1 complex subunit sigma-2	AP1S2
0	65775364	60584216	110940304	215067952	42896812	138298736	0	51893744	166465376	165708416	227814608	0	285274848	0	0	0	238211760	0	50791812	497181536	0	264480736	0	90329248	92372840	120614368	84618928	128587376	81194432	11466151	66082528	106413984	106467920	94998672	106450416	2	2	2	1828	47418	19642	Q96PC3;Q96PC3-4;F8W8K9;G5E966;B8ZZZ1;Q96PC3-3;Q96PC3-2	Q96PC3;Q96PC3-4;F8W8K9;G5E966;B8ZZZ1;Q96PC3-3;Q96PC3-2	AP-1 complex subunit sigma-3	AP1S3
328502912	2894471680	3121822208	3353054208	3516495104	3161604864	3803925248	2746579200	2760152832	3095455488	2508251648	3236752384	3343417344	3265866752	3305089792	3284181760	2981426176	317695680	2965460480	2733380352	3268686592	3321218304	2318329088	2782065408	2026856960	188145376	1707148416	1781166336	1645423616	1365212160	192846368	2100140032	1570440576	1587695616	1739525760	1703412736	30	30	22	10754	0	32331	O95782;O95782-2;M0R2D9;E9PPY8	O95782;O95782-2	AP-2 complex subunit alpha-1	AP2A1
625547776	590421760	597816640	626579520	481097568	424548896	72928376	464614688	357984352	383593440	381552832	322406336	587451904	712466240	628451648	567014400	465374112	581153408	543010176	365745632	59891892	469190848	357287168	327400000	650002304	839756	809477632	867348032	61181976	776492608	768841728	749579584	659308736	568060032	694450944	60330728	26	18	18	10396	0	19119	O94973;O94973-2;A0A0G2JS82;O94973-3;A0A0G2JQM1;E9PR62;A0A0G2JRF9;A0A0G2JQA4;A0A0G2JRS3;A0A0G2JQT9;H0YEG0;E9PNC4;A0A0G2JS17;H0YDE9;E9PQP4	O94973;O94973-2;A0A0G2JS82;O94973-3;A0A0G2JQM1	AP-2 complex subunit alpha-2	AP2A2
860253952	97831344	835610240	911126656	1109120384	876820224	830022336	742506304	729454400	75994504	696302080	667343104	82099728	710011136	680327872	654051776	923219648	725799552	1058609280	868717504	651554112	666500608	830759616	655385216	840040896	89938256	1086364672	982263744	1152191872	1074322560	98068080	1330808448	914633152	124406512	969062336	1055178176	34	19	19	10455	0	25669	P63010;P63010-2;A0A087X253;P63010-3;A0A087WU93;A0A087WZQ6;A0A087WYD1;K7ERB2;K7EN71;K7EJX1;K7EJ01;A0A087WXS3;K7EKZ5;K7EMN7	P63010;P63010-2;A0A087X253;P63010-3;A0A087WU93;A0A087WZQ6;A0A087WYD1	AP-2 complex subunit beta	AP2B1
2941110528	2715026176	2273492224	2605579008	2340974336	2124001152	2316731136	2431448064	2671568896	2493184768	2404659456	2527691008	226628512	3246898432	2815938560	1925321472	2846751232	295770592	2707023104	2482125312	2182170368	2468950016	2835074304	1865735552	2101386112	2056709888	2189690880	2013207168	2141418624	216932368	1608583680	1362918528	1821857408	1666870784	1832143360	1547175168	16	16	16	49654	0	1344	Q96CW1;Q96CW1-2;A0A087WY71;E9PFW3;C9JJ47;C9JTK4;C9JGT8;C9JJD3;C9JPV8;H7C4C3	Q96CW1;Q96CW1-2;A0A087WY71;E9PFW3;C9JJ47;C9JTK4;C9JGT8	AP-2 complex subunit mu	AP2M1
2109439872	1815684608	2469379840	2597593600	2302314240	1969006336	1041778240	1933535744	1574321152	1583206400	1546678656	1702860416	213721360	2437923584	2358448640	2587341568	1699914752	2262157568	2349947648	2382329856	2953383936	2829670144	3067333376	2089438464	3403658752	3663954176	1355399296	1651172480	2597800192	2031292800	1966356224	2300405248	156123392	2490264576	3388275456	2327181312	7	7	7	17018	0	37299	P53680;M0R0N4;M0QYZ2;M0QZ21;X6R390;P53680-2;M0R1S0	P53680;M0R0N4;M0QYZ2;M0QZ21;X6R390;P53680-2	AP-2 complex subunit sigma	AP2S1
189157424	1755136768	1610581888	170849136	1570247168	1543298432	1725581568	1458994432	1454236800	1661896064	1472942848	1662883968	142589120	1768853632	1576172160	1698938880	1735882240	172561280	1613472128	1701757184	1497917056	1603561984	1496601728	1570698496	1400566016	1294418432	1336015616	1347139072	1132362752	1386061440	1206098688	1087051392	1519612800	1170002304	1418881920	10069275	31	31	31	12132	0	17693	O00203;O00203-3;Q13367;Q13367-4;Q13367-3;H0YBD0;F5GWU4;F5GYB0	O00203;O00203-3	AP-3 complex subunit beta-1	AP3B1
1352811776	1254474496	1230330368	1407996672	1272003328	1260046848	1468333184	1293513216	1280576512	1158374528	133312000	1148071424	1404349440	1214391424	1249268096	1161538048	1359444096	1178758912	1511741696	1331304320	1363757184	1255177472	1139509504	1190268032	733202048	86567320	767958848	909660864	753735424	720863168	785734784	821032960	868362560	906807872	861924288	877004992	32	32	32	13665	0	32331	O14617-5;O14617;O14617-4;O14617-2;O14617-3;A0A087WYN6;K7ELX8;K7ERW8	O14617-5;O14617;O14617-4;O14617-2;O14617-3	AP-3 complex subunit delta-1	AP3D1
2326201600	239463584	275725312	2541345536	2847137536	2524816128	3047023616	2659337728	2784686336	2511975936	2687794944	2673895424	2803244032	2691511040	2347344128	2441054208	2869458176	2733834496	2545009152	2549499904	3010589952	2391888896	2358008320	2484632832	1442324736	1712918144	1411114880	1840485120	157924880	1829153280	1571176448	1404387840	1708558976	206971120	1628302464	2091192832	15	15	12	46939	0	32331	Q9Y2T2	Q9Y2T2	AP-3 complex subunit mu-1	AP3M1
0	0	0	0	0	0	0	36103312	0	0	0	0	0	0	0	0	0	0	0	0	0	0	0	0	21869784	50838948	15552391	24649284	22210584	12210589	60283016	43557796	68446688	281426400	43056328	38109132	6	3	3	46977	0	43444	P53677;E5RJ52;E7ER80;P53677-2;H0YBM0;H0YBA0	P53677;E5RJ52;E7ER80;P53677-2	AP-3 complex subunit mu-2	AP3M2
1079514624	1288807552	1390125312	1988439680	974035776	1142896896	1950648704	1204500224	1224617984	1003207296	1299545728	1605398784	150932848	1291827328	1343404288	1338826752	168645488	1357225600	1913785344	1202364032	1473903744	1601089664	1890277376	166482896	1647625856	1895529344	2101469440	1737705216	1723906048	1850879104	1650717440	1606503936	195756928	1874332416	1429559936	1792714112	7	7	3	21732	0	56152	Q92572	Q92572	AP-3 complex subunit sigma-1	AP3S1
34925776	74451912	42639532	29005452	161038272	14928137	174895440	157466336	185701504	12904008	164998576	132479416	29967798	26943052	28661632	85436864	108447768	112259920	92988712	61708448	54393716	113504464	138139920	118533832	34664060	111743760	52491776	0	50577896	75556864	58361392	53971384	133179616	73528752	117578896	80124928	3	3	2	23398	0	10933	H0YLI7;P59780;H0YLX6;H0YN38;P59780-2	H0YLI7;P59780	AP-3 complex subunit sigma-2	AP3S2
204988224	260498240	284535040	39225444	157008032	38824584	12823855	7092518	11032439	1371726	32501574	16295543	36613796	9048708	39101312	14627372	31338312	38508556	35275324	13190874	17707964	48005480	25940832	63497584	62618844	42291836	3184251	27817668	26760948	27990516	24413868	30102824	51896004	30622060	71550752	11379877	7	7	7	83259	15547	58043	Q9Y6B7;B1ALD0;B1ALD2;Q9Y6B7-2;B1ALD3;B1ALD1	Q9Y6B7;B1ALD0	AP-4 complex subunit beta-1;AP complex subunit beta	AP4B1
74390520	55229560	74140824	90162912	91341752	65748608	83770312	84435752	82406320	827004	60752348	95351512	70577264	86561816	85878984	84534704	97656704	107199992	58795476	91198584	59083892	64427904	108376712	7301273	23969478	25157852	49573264	2992955	33152472	28385132	31649728	46890416	46504152	36375464	23465368	50628844	11	11	11	12729	0	9771	Q9UPM8;Q9UPM8-2;H0YK95;H0YL95;H0YK94	Q9UPM8;Q9UPM8-2	AP-4 complex subunit epsilon-1	AP4E1
193493088	69709168	282111840	230429536	265281344	30850368	287297632	259173552	362428992	346395104	206699424	278309632	331437280	339955904	354345568	319377312	370001856	33726052	112453168	23989536	341567264	31128032	299460160	23484340	47929616	124040608	129969992	78174656	80469296	116878360	12335571	98712880	138951392	187685696	96930248	167289312	9	9	9	49976	0	30241	O00189;C9JWL4;C9JC87;C9JMG3;C9IZL5;H7C0A0;H7BZV3;F8WCR6;H0Y6K1;F8WDR3;F8WCC5	O00189;C9JWL4;C9JC87;C9JMG3;C9IZL5	AP-4 complex subunit mu-1	AP4M1
335798656	355976960	296575872	350162304	276677536	337402112	258467200	29504992	224064192	312210624	23628594	278070688	249528448	218069200	250753008	426057536	222962176	232568368	317952960	281422336	141697744	194522368	252365696	247804128	206769152	174623424	132728056	229638560	212870528	185390368	205292432	145197264	160013424	158969808	203522656	135325568	4	4	4	17005	15929	66489	Q9Y587;G3V3X7;Q9Y587-2;G3V4P7;G3V5J6;Q9Y587-3;Q9Y587-4	Q9Y587;G3V3X7;Q9Y587-2;G3V4P7;G3V5J6;Q9Y587-3;Q9Y587-4	AP-4 complex subunit sigma-1	AP4S1
31054632	13720709	19694096	16859068	43797612	48781648	54584872	8106765	12638698	52506376	36814596	35010176	1764995	39529248	0	0	22469472	50766552	29662302	23804148	7666018	61131432	28648428	13527167	0	0	0	126607056	4803209	127730264	0	18155912	123273920	125250768	19245828	0	4	4	4	93948	29998	47212	Q2VPB7	Q2VPB7	AP-5 complex subunit beta-1	AP5B1
113184752	120760424	0	9793154	305620832	81197912	270380320	66548672	75205904	741477	2019503	166084464	8574387	174498208	116661896	211790656	182484944	290298720	102967784	19191408	215112992	107556568	110961640	165048160	109315600	0	132620528	107351160	15204583	197528208	10185323	101083640	184432368	28137822	192897856	144957392	4	4	4	22522	0	20087	Q9NUS5;Q5JX74;A2A2L4	Q9NUS5	AP-5 complex subunit sigma-1	AP5S1
118130000	47258984	71323776	52673940	151287760	96867248	168457776	101808848	122232960	679673	83448488	83235056	4373784	82432568	48936468	51100028	79437264	12540205	53579816	84390464	100223792	63523316	60948924	889956	10886719	17331136	12485527	31711808	73448800	67661704	60563772	57481768	37864068	45632820	42875240	92130048	8	8	8	88604	0	92091	O43299;O43299-2;O43299-3	O43299;O43299-2	AP-5 complex subunit zeta-1	AP5Z1
22128598	29638628	39198660	36469400	45953612	33155596	38692856	14262124	4629866	25694812	11033786	35404220	15918171	44241936	31700084	29834282	35554060	34573128	18183788	29877104	21550184	15765436	11655077	16958076	25481608	37472664	10630431	18834426	13210921	20048728	27594484	45542472	19359388	17005024	13218537	10423186	10	10	10	14184	0	23402	O14727;O14727-4;C9JLV4;O14727-5;O14727-3;O14727-2;O14727-6;F8VNZ0	O14727;O14727-4;C9JLV4;O14727-5;O14727-3;O14727-2;O14727-6	Apoptotic protease-activating factor 1	APAF1
26875032	22789602	0	0	3739119	37672288	32959652	3376878	47705576	0	0	0	39940652	41411072	35739012	0	31796448	0	0	0	42506400	38635344	36913764	3712159	19931380	0	0	0	0	0	0	0	0	0	0	0	4	4	4	77243	15323	52919	O00213;A0A075B7G8;J3KPL8;O00213-2;A0A087X0V7;A0A087WYH9;O00213-4;O00213-6;O00213-3;O00213-5;V9GY97;V9GYR7	O00213;A0A075B7G8;J3KPL8;O00213-2;A0A087X0V7;A0A087WYH9;O00213-4;O00213-6;O00213-3;O00213-5;V9GY97	Amyloid beta A4 precursor protein-binding family B member 1	APBB1
1254704128	1206421504	946950464	1343265792	1552418688	1863328896	1959958016	1533943552	1498122240	1360840064	1447924480	1405104256	1249331840	1025938112	906679104	676822336	194594416	1867418496	1407331200	1181190272	1274474112	1035989120	1154211456	995324352	1379882624	1748373632	1616489728	1766817664	18596344	1981300608	2157773056	2037862912	1720855296	1436318592	1458135552	1406362624	17	17	16	73182	0	30419	Q7Z5R6;Q7Z5R6-2;C9J164;Q70E73-5;Q70E73-2;Q70E73-8;Q70E73-7;Q70E73-4;Q70E73-3;Q70E73-9;Q70E73-6	Q7Z5R6	Amyloid beta A4 precursor protein-binding family B member 1-interacting protein	APBB1IP
0	0	0	0	0	8371604	677344	846761	5487051	831812	3103486	801183	0	0	0	1897201	2110976	3381772	1737032	7475916	1924835	553359	2852414	4357239	159806	0	3465061	0	5135639	6305413	354794	783894	8125541	3398485	596041	1522323	5	5	5	31164	20604	26494	P25054;P25054-2;E9PFT7;B7Z2B6;E7EMH9;A0A087X2F3;R4GMU6	P25054;P25054-2;E9PFT7;B7Z2B6	Adenomatous polyposis coli protein	APC
1738107136	1658837120	2000990336	1863827456	1695238144	1649381504	1767072384	1727609344	1466521472	1648118528	1596502272	1604474880	1535933056	158823792	1352036608	1458136448	1579380224	210143872	1878666496	1690471040	1523762688	1309494272	1565449600	1389862144	2977371136	2790620672	2934209792	2208808448	3080004352	2786585344	3107659776	3113908992	2063070976	2290146560	2123586176	1826350208	20	20	20	81224	0	30381	P13798;C9JIF9;H7C393;H7C1U0;C9JLK2;H0YFE5;F8WEH5	P13798;C9JIF9	Acylamino-acid-releasing enzyme	APEH
2076204672	1875364096	2199668992	2089018240	2482087936	2070329984	2008950400	189901472	2342274560	1992748544	1953883520	2004106752	2095755776	2207308544	2242894848	2327703808	189210288	2086280448	2431266304	2141171840	2323887360	2112872832	17723268	1529531648	2501323264	262420672	2728984832	2306099968	231661248	2638739968	3595583488	2843897600	2185614848	2692137216	2092587520	2875121664	13	13	13	35554	0	32331	P27695;G3V3M6;G3V5Q1;G3V3C7;A0A0C4DGK8;G3V5M0;G3V359;G3V5D9;H7C4A8;G3V3Y6;G3V2D9	P27695;G3V3M6;G3V5Q1;G3V3C7;A0A0C4DGK8;G3V5M0;G3V359	DNA-(apurinic or apyrimidinic site) lyase;DNA-(apurinic or apyrimidinic site) lyase, mitochondrial	APEX1
371350336	362376384	306007744	199047936	93089608	303065696	39176936	18280696	75405904	563696576	404824512	51642668	316706560	187554288	195962112	360990752	158060912	17064500	397449504	113190400	179422752	140441200	314576576	201385680	159040848	144683408	234865440	89977888	219902000	178661536	173061888	200178656	178260192	238022528	180690208	252257936	5	5	5	574	0	26522	Q9UBZ4	Q9UBZ4	DNA-(apurinic or apyrimidinic site) lyase 2	APEX2
0	0	4422366	58704432	0	0	119634560	48950368	0	72895848	0	0	57277372	63411912	0	47138496	53883604	0	61300456	55848772	87469456	9859449	87398848	75223208	0	0	0	0	35115152	31012558	0	0	45781640	37008572	0	0	1	1	1	28996	16713	2912	Q96BI3;Q96BI3-2;Q5TB21	Q96BI3;Q96BI3-2;Q5TB21	Gamma-secretase subunit APH-1A	APH1A
0	5431358	27931160	73344880	116097048	88019208	88033640	0	51878740	0	42080548	55582564	49073468	104294904	37956652	1641129	13577942	29495752	5753429	61175188	26106386	3739011	0	10701461	19995466	0	27976602	2207325	13074692	16285955	29675200	23017442	0	0	30029384	0	1	1	1	2846	89755	16153	Q8WW43;H0YKZ9;H0YLT0;Q8WW43-2	Q8WW43;H0YKZ9;H0YLT0;Q8WW43-2	Gamma-secretase subunit APH-1B	APH1B
6628222464	5605257216	5853666816	6082794496	7122928128	6912885248	5715209728	7419372032	5555985920	7039351296	6468905472	6722531328	6544151552	6177462272	6019052032	5783529472	7485249536	7166308864	6538956288	632143808	6884704768	6831168000	7106840576	6856590336	6714388480	5963779072	7120445952	7104717312	7320766976	7180580864	76591448	7543711744	7411278336	7037133312	6907707904	5624749056	24	24	24	59004	0	25436	Q9BZZ5;Q9BZZ5-2;G3V1C3;Q9BZZ5-6;Q9BZZ5-3;Q9BZZ5-1;Q9BZZ5-5;H0YER7;E9PQK6	Q9BZZ5;Q9BZZ5-2;G3V1C3;Q9BZZ5-6;Q9BZZ5-3;Q9BZZ5-1;Q9BZZ5-5;H0YER7	Apoptosis inhibitor 5	API5
686534976	459873472	704230272	460249664	73718144	408561184	8668619	353724320	205499440	448681984	59568176	890911616	801269760	68143160	462877312	47473480	788224768	77658472	981195264	450314848	377284960	738465664	785339072	372714560	396918848	618915776	24376580	57634552	349296512	437081152	232641984	349748576	578612928	447845504	417010688	353796512	7	7	7	27125	0	20769	Q96GX9;S4R3D6;Q96GX9-3	Q96GX9;S4R3D6;Q96GX9-3	Methylthioribulose-1-phosphate dehydratase	APIP
60751240	68436520	0	69341200	76542440	90518040	75276592	7013951	83711008	80792768	64750732	88740504	73687232	49262840	61577276	72097984	9149041	83341336	9845244	88108136	30234940	48268952	76955200	37374444	0	5092447	62145760	0	63901504	0	36886756	40810044	0	48370016	0	39342808	1	1	1	15893	71521	34614	Q8N2Z9;R4GMN7	Q8N2Z9;R4GMN7	Centromere protein S	APITD1;APITD1-CORT
1206463104	1479990400	1545026688	1487505280	177851888	1391322880	1412765440	1462183680	1660434304	1695269632	1526118656	1535196672	1421091328	1685288192	1452246400	1422536448	13404737	1539183360	1407676928	1616718208	1441695872	1286322944	1217440640	934366400	2134943232	1835249664	196218496	1844661760	3569655552	2023624192	2431101696	2472181248	1503575680	1846399232	1860183424	2041401728	12	12	12	4648	0	11216	Q9HDC9;H0Y512;Q9HDC9-2	Q9HDC9;H0Y512;Q9HDC9-2	Adipocyte plasma membrane-associated protein	APMAP
3793270528	3509383680	3837914624	3603575552	380472416	4259122432	4582098944	3999441920	3539305472	4372770304	3898339840	4576225280	4160419584	3843017472	4108801024	4164822016	4261577472	4858157056	4012811776	4371692544	3789185536	389167424	3742855936	3659536640	3228741120	3010978560	3088964608	3313692160	3281692672	2939994880	3674080768	3273432064	3099166464	2849484544	2864440064	3170280960	11	11	11	31674	0	43752	Q8NCW5;Q8NCW5-2;Q5T3I4;Q5T3I3	Q8NCW5;Q8NCW5-2	NAD(P)H-hydrate epimerase	APOA1BP
4193611	4772071	1739318	3394999	7734346	4981478	9306485	4858619	610372	6339421	2469089	8006687	6083321	1450992	3291368	138787	4605968	7086311	4667616	5297032	3180958	1789104	2515027	9346224	74526184	71684768	88324136	66738888	63442240	69626608	50511180	6665499	54587616	54624324	66429256	50249696	10	7	7	5156	85251	32847	P04114;A0A087WTM7;A8MUN2	P04114;A0A087WTM7	Apolipoprotein B-100;Apolipoprotein B-48	APOB
903847488	923385792	544977152	881168384	261776912	514508832	556571008	743129664	63226468	645781440	838939200	630205504	898642688	520832576	546904192	750289920	484455776	547337984	701910912	61225112	607815744	514008192	1092036864	403126816	1086657408	1126591744	1355378944	1192300544	779375168	1084518400	1276379520	1134584576	1438191360	748310272	1261118720	1160505088	8	8	7	22826	0	3557	Q9NRW3;Q8IUX4;A0A087WX48	Q9NRW3	DNA dC->dU-editing enzyme APOBEC-3C	APOBEC3C
0	0	8386112	7143107	0	0	0	0	0	0	0	0	0	0	0	5455727	0	0	18747348	0	0	0	0	0	0	0	0	0	0	0	0	0	0	0	0	0	3	2	2	46598	0	95817	Q96AK3;Q6ICH2;Q9UH17;B0QYD3;Q9UH17-2;Q9UH17-3	Q96AK3;Q6ICH2;Q9UH17;B0QYD3;Q9UH17-2;Q9UH17-3	DNA dC->dU-editing enzyme APOBEC-3D;DNA dC->dU-editing enzyme APOBEC-3B	APOBEC3D;bK150C2.9;APOBEC3B
20605634	26970328	9809866	20660054	0	0	19845588	0	0	2624197	0	0	47459500	20827756	28303900	30104524	10678297	23805348	31423756	0	29716404	20327556	21649800	0	18704182	33621916	0	32118338	15607091	0	74828224	62104584	19619572	17212784	62395744	30031276	2	2	2	46407	2963	23154	Q9HC16	Q9HC16	DNA dC->dU-editing enzyme APOBEC-3G	APOBEC3G
233990928	385652352	235706080	310302880	61119884	316048736	266844448	326436544	388311776	283581312	470437792	386567520	85477272	0	0	0	185415488	437159104	190873360	137347680	123059664	7156807	0	0	149517392	140672992	308487616	106405976	139891792	124515168	173125008	159417472	138936336	93112584	17935084	0	1	1	1	10852	0	89029	P02656;B0YIW2	P02656;B0YIW2	Apolipoprotein C-III	APOC3
15908379	0	49753352	0	31110188	0	0	0	0	0	57445088	0	0	0	0	30040804	30277442	51862936	0	0	0	0	113816960	0	65364884	124689392	194225616	202409920	74917528	56028788	215133584	355394176	0	89099488	21458844	224389696	5	5	5	24158	71777	35285	C9JF17;P05090;C9JX71	C9JF17;P05090;C9JX71	Apolipoprotein D	APOD
33930488	0	0	0	0	0	0	0	0	0	0	29518960	0	77863200	32824344	0	0	25610136	0	0	21699732	0	0	26199852	0	0	0	0	0	28350328	0	0	0	0	0	0	5	1	1	36154	29744	44402	P02649	P02649	Apolipoprotein E	APOE
370576384	25940074	338845440	296475776	499609824	378133248	554969856	40005672	32609578	319900640	304303008	244975776	183852336	293227904	199326576	192173840	218897632	389527712	326199328	253562400	306693984	30139032	369412320	300895648	440247968	462291040	444945824	409041600	647636992	644738880	99167528	862365056	891170624	942725568	491175392	807765888	7	7	7	48915	0	41566	J3KQL8;Q9BQE5;E9PM95	J3KQL8;Q9BQE5	Apolipoprotein L2	APOL2
592800896	57635472	573579200	652474240	487963552	386706784	433105056	391179520	300756416	72606912	8617929	79807616	611108800	372740928	366996000	355132800	463358400	417943040	398602944	385205824	496888736	456894336	378705664	433488160	884616704	776078592	860142976	1083758848	778224896	771971840	736838784	814157888	372266752	742067456	666742976	764797568	4	4	4	22284	16247	73687	Q9BUR5;H7C1U8;Q9BUR5-2;G3V1B6	Q9BUR5;H7C1U8;Q9BUR5-2;G3V1B6	Apolipoprotein O	APOO
500174368	636069504	496469888	637140736	554328640	46716752	823881344	654231808	817844544	345167840	93271040	558039296	531936896	58687968	579398976	480880896	254452848	395182592	451836224	583694272	615869440	531427872	702014912	635731584	0	0	0	0	0	0	0	0	0	0	0	0	6	6	6	29159	0	21261	Q6UXV4;A0A087WYF7;A0A087WUX8	Q6UXV4;A0A087WYF7;A0A087WUX8	MICOS complex subunit MIC27	APOOL
0	0	0	5558952	0	0	0	0	0	0	0	0	0	0	0	0	0	0	0	0	0	0	0	0	42843368	42383416	41063448	46092624	47225392	53360280	53004156	76097072	44835400	3362936	5879635	62565048	2	2	2	86942	0	29262	P05067;P05067-4;P05067-8;H7C0V9;A0A0A0MRG2;E9PG40;P05067-10;P05067-3;P05067-5;P05067-6;P05067-7;P05067-11;P05067-9;H7C2L2	P05067;P05067-4;P05067-8;H7C0V9;A0A0A0MRG2;E9PG40;P05067-10;P05067-3;P05067-5;P05067-6;P05067-7;P05067-11;P05067-9;H7C2L2	Amyloid beta A4 protein;N-APP;Soluble APP-alpha;Soluble APP-beta;C99;Beta-amyloid protein 42;Beta-amyloid protein 40;C83;P3(42);P3(40);C80;Gamma-secretase C-terminal fragment 59;Gamma-secretase C-terminal fragment 57;Gamma-secretase C-terminal fragment 50;C31	APP
594140736	416728224	597015040	508371360	74747720	453095616	517084864	509894208	41156680	531576576	416966432	614355968	530319744	427451456	48350676	477675392	458049568	530332160	480814240	477768608	504177056	454033248	436999744	496485600	533185632	401686208	416118752	57486824	302428128	519569280	413669120	438882752	366433760	360540320	438367872	511728928	17	17	17	79663	0	12435	Q9UKG1;C9JAB0;Q8NEU8;C9K0C4;H0YH86;Q8NEU8-2;Q8NEU8-3	Q9UKG1	DCC-interacting protein 13-alpha	APPL1
1173250688	1284072448	1468194304	1215417216	1338687616	1231003520	1259362816	1165343104	1217331200	1012527424	9614954496	1241866112	1284114304	1423195008	1210338688	1372133504	1271916672	1359210752	1359897216	1223527808	1424436736	118261848	1207043968	1190757248	1606142208	1587071872	1439315584	1845881856	1445691008	1367347968	1735176320	1705619840	8418362368	1408588416	1507568512	982420224	8	8	8	19608	0	19192	P07741;P07741-2;H3BQZ9;H3BQB1;H3BQF1;H3BSW3	P07741;P07741-2;H3BQZ9;H3BQB1;H3BQF1	Adenine phosphoribosyltransferase	APRT
195751920	205318176	155005104	172260320	182900512	141659744	113313344	118381368	202451568	165606464	16623201	117594648	192450752	81037976	115763976	114570840	131368720	206432816	104270016	124314752	89553112	170439392	144241616	115508760	173120336	146112528	223100880	122817272	260476320	185337152	144288864	139466304	182140384	158891824	156808864	12379466	6	6	6	4074	0	90084	Q7Z2E3;Q7Z2E3-9;Q7Z2E3-11;Q7Z2E3-7;F8W6G5;C9JZ40;A0A0A0MRW7;Q7Z2E3-3;Q7Z2E3-5;Q7Z2E3-10;Q7Z2E3-8;Q7Z2E3-4;C9J8U3;Q7Z2E3-6;Q7Z2E3-2;Q7Z2E3-13;F8WBD6;E7EUY4;F8WBM3;Q6JV79;E7EVB7;Q7Z2E3-12	Q7Z2E3;Q7Z2E3-9;Q7Z2E3-11;Q7Z2E3-7;F8W6G5;C9JZ40;A0A0A0MRW7;Q7Z2E3-3;Q7Z2E3-5;Q7Z2E3-10;Q7Z2E3-8;Q7Z2E3-4;C9J8U3;Q7Z2E3-6;Q7Z2E3-2;Q7Z2E3-13	Aprataxin	APTX
387252480	428169600	611884800	653665536	742129856	893101056	729967296	76726472	847746240	870722560	785389632	924166336	629144832	583163840	707782976	635046336	563728192	801580928	681058560	537456448	588138880	689871168	696121472	480342848	1166309376	1106281472	1080840960	1147012608	1037065408	967938368	1247986560	1093006848	867419840	1010907840	1101243264	645967680	37	36	32	17129	0	28615	O60306;H0YH15	O60306	Intron-binding protein aquarius	AQR
343091392	10184588	29345832	128786560	122983208	104166744	232871568	229716688	318199712	242079936	244912800	305973216	281553632	24450516	296432480	270402432	245243872	246278944	288644704	244957760	393155968	238689968	53581636	23694012	185062096	210144912	2282617	199927008	177099536	157607504	185382464	185042912	196997216	193506736	203289168	196744352	11	7	6	67585	0	22018	P10398;Q96II5	P10398;Q96II5	Serine/threonine-protein kinase A-Raf	ARAF
230683984	204258096	241633680	191263792	172741120	121704560	145638432	184066112	174746784	125894144	117165440	135565968	217882448	250902592	125158448	132475904	205845280	158037360	183496528	157366432	240125424	22825884	19423994	263068384	209040528	164134304	15123103	172053264	236327552	209498704	214739024	170939280	178201472	119900576	219721120	18978040	24	24	24	16219	0	2438	Q96P48;Q96P48-3;Q96P48-1;Q96P48-4;E7EU13;Q96P48-2;Q96P48-7;A0A0A0MSJ2;Q96P48-5;F5GWN4;F8WBT0;F5GWQ2;H0YGD1	Q96P48;Q96P48-3;Q96P48-1;Q96P48-4;E7EU13;Q96P48-2;Q96P48-7;A0A0A0MSJ2;Q96P48-5	Arf-GAP with Rho-GAP domain, ANK repeat and PH domain-containing protein 1	ARAP1
0	53956592	38638160	30629658	26988822	31309062	103357488	7954606	31003572	26991140	34417864	91426904	119668200	0	145102768	0	9218753	121123376	63418492	141373664	0	5564606	34982068	72887200	0	0	0	0	0	0	0	0	0	0	0	0	1	1	1	45315	85997	1634	Q7LC44	Q7LC44	Activity-regulated cytoskeleton-associated protein	ARC
5129595392	5417317888	5452126208	554900096	7093936128	6940295680	6742750720	664535104	7015182336	7241717248	768364992	722332736	5808705536	5999549952	5210189824	5226037760	6018050048	5860570112	6589355520	7023684096	5161827840	5955299328	694854208	551231104	7153999872	8843956224	7193831936	7129119232	6151564800	6840778752	6255256064	7036312064	7669291520	6447275520	7343557120	6062691840	26	26	26	5721	0	32331	P48444;B0YIW6;P48444-2;Q6P1Q5;E9PK34	P48444;B0YIW6;P48444-2	Coatomer subunit delta	ARCN1
4957993984	4842375680	6318804992	5406438400	7287495680	5134210048	5706405888	4239285760	4255329792	5495526400	5172240384	5634671616	5358109184	4964703744	4948281344	4693978112	4316448768	5552304128	46259628	4189585920	5303412224	5207263744	4290626816	417554432	3874446080	3611776000	3938333440	4163234560	352872896	3645809152	3910483200	3962462720	3316671744	3281562624	3723407104	4385423360	9	5	5	20697	0	11826	P84077;P61204;F5H423;F5H0C7;P61204-2;F5H1V1;F5H6T5;H0YGG7	P84077;P61204;F5H423;F5H0C7;P61204-2	ADP-ribosylation factor 1;ADP-ribosylation factor 3	ARF1;ARF3
2209647104	2333158144	1857783936	2618517504	2321165568	1812062976	2125580160	1999111936	1754782976	1802149760	1822709760	1715035776	2117720192	1879613056	1941142784	1772804096	3280915456	3108463360	3452433920	2083837568	2510494208	1729053184	2413403648	2560601600	1997001600	1834298880	2223348224	1681928832	1750204928	2075727488	2013506816	1854791424	1077808384	1970185728	1571641088	1734302080	11	11	7	20511	0	224	P18085;C9JPM4;C9JAK5;U3KQF2	P18085;C9JPM4;C9JAK5	ADP-ribosylation factor 4	ARF4
8220906496	6440105984	6329877504	5908865024	3572561152	4449676288	3562971904	5395153920	7943995904	7320939008	5893735936	5182715392	3573264896	6557539840	4338036736	720795776	4614830592	2836203264	6083732992	5541353472	5872045056	3226839808	3635932416	4724570624	6052909568	5680399360	7566984704	5212785152	4125930240	383688896	3800647424	4439991808	3992845312	5531908608	5284979200	44642036	10	6	5	20529	0	7298	P84085;C9J1Z8;F8WDB3	P84085;C9J1Z8	ADP-ribosylation factor 5	ARF5
4528074240	3693170432	3350465792	3501763840	4073467904	3727839488	418998624	37798392	2933155584	329410464	3678181376	3509997056	4574367744	331378752	3749860608	3536095744	3949799936	3895550976	4433613312	4141744640	2468662528	3316821248	377656928	3335918848	2517653248	2299916544	2712554752	2770726400	3127245568	2742088704	2663748608	2387805696	2681593344	2183545600	2270478336	2322532608	6	6	6	20082	0	32939	P62330	P62330	ADP-ribosylation factor 6	ARF6
207498336	231170192	257825104	271904544	25133568	272476256	9249146	320155456	316964640	399439744	518416832	32293276	272881056	272349856	221028480	125786864	333206176	365193824	363803520	395276224	447910304	215808288	325239296	368428384	254195008	262769296	253851856	221038848	251844416	179648480	163474528	104322464	220451232	100752192	167373296	142557728	7	7	7	44667	0	79877	Q8N6T3;F8W1U7;F8VWH9;Q8N6T3-4;Q8N6T3-5;Q8N6T3-2;E5RHT6;Q8N6T3-3;E5RHC5;E5RHH7	Q8N6T3;F8W1U7;F8VWH9;Q8N6T3-4;Q8N6T3-5;Q8N6T3-2;E5RHT6;Q8N6T3-3;E5RHC5	ADP-ribosylation factor GTPase-activating protein 1	ARFGAP1
61422784	74949504	0	6093585	44307928	36636092	74569448	59304716	0	0	0	0	0	31684668	29747264	21212704	75156424	0	0	68185424	59870492	71198752	0	0	0	0	0	0	0	0	0	0	0	0	0	0	10	1	1	3606	1	-2	E9PIY6;E9PJT7;E9PK28;E9PN48;H0YDX1;H0YF45;E9PMR9;E9PM63;E9PM18;E9PNY8	E9PIY6;E9PJT7;E9PK28;E9PN48;H0YDX1		ARFGAP2
358745920	273557792	263450560	418421888	36217680	466665952	462046592	452973536	434407648	553269184	501343648	547114432	402880960	39186224	406993184	342490272	465866848	502912224	405199552	535600864	42889064	577966080	539574784	512633920	390360640	281087936	443748576	459681664	48192308	487223488	482269632	507420928	586783168	364165824	623883968	53018360	12	12	3	5672	0	12864	Q8N6H7;G5E9L0;E9PQP3;A0A0D9SF70;Q8N6H7-2;E9PMU9;Q8N6H7-3;H0YDN9	Q8N6H7;G5E9L0;E9PQP3;A0A0D9SF70;Q8N6H7-2	ADP-ribosylation factor GTPase-activating protein 2	ARFGAP2
150276800	88791600	91130784	146956112	91264056	224145328	193588736	148131376	231201440	125315400	101401616	470511520	8369037	75157232	79582136	63679928	68904976	48671464	90104464	76612896	143874128	63456228	273527936	160084224	230856160	268305136	153842960	246572864	132629936	222895760	309752320	117239248	243715744	149437648	344417792	110253952	8	8	8	56928	0	20633	Q9NP61;Q9NP61-2;B0QYV8;H0Y6A0;B0QYV9	Q9NP61;Q9NP61-2	ADP-ribosylation factor GTPase-activating protein 3	ARFGAP3
183994112	225847728	19743534	179484352	203395952	162261200	191961984	204472416	16421424	16677743	123212480	200427984	191510608	254689920	180642336	20857512	172517808	194234384	141453632	207664384	177869056	197838016	150864640	143581840	80739656	119177312	82267960	118804216	137948464	6998651	97438464	76912928	94588824	113225192	129937912	12472593	33	33	25	20876	0	21218	Q9Y6D6;E5RIF2;E5RHL7;E5RJB2;E5RHZ1;E5RJN9	Q9Y6D6;E5RIF2	Brefeldin A-inhibited guanine nucleotide-exchange protein 1	ARFGEF1
93760040	108858816	120319304	96295896	138938816	113387048	95900480	99273240	86266432	87583280	94705184	128132680	93210712	199865136	125444504	200076944	143605088	18058942	178958592	167965744	226152592	238478480	140117344	110625392	116030336	182252048	18300264	202871776	209707696	163929920	23619746	196874656	108098352	182530704	221554368	194309728	32	24	24	20204	0	12749	Q9Y6D5	Q9Y6D5	Brefeldin A-inhibited guanine nucleotide-exchange protein 2	ARFGEF2
600624192	2042452352	793790592	746621184	983793024	1278736896	731342144	1010092672	742471552	1666073216	815443584	1284279168	921731072	1361215744	710426304	837556224	939369280	970919104	844222272	1597718144	880908928	149550352	1647215872	939192768	1413033856	1117288576	1830988544	1335849856	1889746816	1542161024	1087091840	1036032576	1459501568	2067491968	1061518144	1512328448	10	10	10	38598	0	32331	P53367-2;P53367;P53367-3	P53367-2;P53367	Arfaptin-1	ARFIP1
135829072	19940924	121406296	170676256	113981408	197118896	250561168	170764816	196920736	251052768	241716208	349493472	166667280	234394320	116681024	169159808	16979052	210965760	246496864	85575144	260374240	297083424	194197312	16332814	237886480	218122448	122259152	335690976	101703920	202130688	221346912	315227104	116964128	130135232	291831776	84779232	5	5	5	37855	0	1236	P53365;A0A087X1E4;P53365-3;P53365-2;E9PRV8;E9PPY7	P53365;A0A087X1E4;P53365-3;P53365-2	Arfaptin-2	ARFIP2
24911256	49294952	40763248	84643424	125369136	67338728	111837256	63556880	42684676	8510377	117277392	92154552	15817672	69195712	116276976	95730128	110781824	80529288	84164632	80933176	91845944	102874360	94030040	91222544	0	31776804	0	0	15993664	42510140	60767680	13927839	4188745	21250914	0	33215260	3	3	3	22614	44405	43109	Q13795;Q13795-4;Q13795-3;Q13795-2	Q13795;Q13795-4;Q13795-3;Q13795-2	ADP-ribosylation factor-related protein 1	ARFRP1
30600892	96314736	242278944	68458128	188383312	97451456	86315912	79864192	166519456	162239520	89122792	150715104	0	125256480	100101744	87457952	0	153405536	19677048	66754588	0	140360016	312352288	102467984	67811392	262889824	345808096	9403813	8154011	109893440	146052752	41199188	105510584	90161176	104052240	42012268	8	8	8	34735	0	17712	P05089;P05089-2;P05089-3	P05089;P05089-2;P05089-3	Arginase-1	ARG1
3101732864	3530600192	2790049024	3424361984	3361650432	3050190592	2690476032	2974775552	309587808	3235589120	3038235392	3065482752	342483680	3278050816	2903985920	2516023552	3021228288	2709973760	2981346048	3412557056	2492711936	3541849344	3637925120	243633536	2820037888	2001018112	194714128	1612360960	2759991040	2369157376	2378569728	2370642432	2125008512	2163801344	2242293760	2468242432	8	8	8	33216	0	38129	Q9NWB6;Q9NWB6-3;Q9NWB6-2;X6R9F1	Q9NWB6;Q9NWB6-3;Q9NWB6-2	Arginine and glutamate-rich protein 1	ARGLU1
3421083904	3104760064	3387018752	3144258048	3470675968	3863822848	3786133760	3622278400	3652099072	4128096768	3983040256	4458034688	3875235584	3898372608	38231544	3600991488	4100961280	3975678208	3781092352	3970092544	4004787712	3637553408	3197790464	3599612416	1320329344	1772876928	1984990336	1906335616	2154387456	1713932672	184236032	1643769728	2619681024	1503171840	1717932800	1895166080	23	23	23	50435	0	31707	Q07960;H0YE29;E9PNR6	Q07960;H0YE29	Rho GTPase-activating protein 1	ARHGAP1
53790268	57410176	10661891	48070588	56314880	83393184	60262804	62547768	38785612	60691148	6908253	54902916	46756176	33492452	52899048	29989196	63482044	58093856	55891620	38631584	26712242	43948516	3537693	39468508	43764428	45649720	58450876	60414888	7255948	6291685	62005028	40016860	27064992	66850428	21181016	17292632	8	8	8	11386	16529	81344	Q6P4F7;Q6P4F7-3;H3BR51;Q6P4F7-2;H3BQ41;Q3KRB8	Q6P4F7;Q6P4F7-3;H3BR51;Q6P4F7-2	Rho GTPase-activating protein 11A	ARHGAP11A
1151840512	1228391808	1218278912	1373143168	1260687744	1388858496	96893432	133288096	872809920	1134466816	75237256	1309902592	1405090176	116842400	1485674112	140480816	1413422848	1342981632	1458321152	1379417984	877553600	113111936	1252876416	607397696	1685762048	1591797632	2102085888	1517745792	1121024768	1368406272	1016871360	1038201344	1316200704	1079842304	1147065472	1003211648	15	15	14	54544	0	66665	Q53QZ3;B8ZZK0;H7BZM0;H0YI33	Q53QZ3	Rho GTPase-activating protein 15	ARHGAP15
1625723904	1598324736	1699589120	2060857600	20107172	1784890752	1942483456	1800856960	25048696	214127232	2566471168	2316784640	2128033536	189967872	1897250048	1714313344	2080483456	2054853504	2228234752	1604458752	1928935936	200232384	2446287104	2348337664	1112944512	1662976256	1456674944	1126862720	1626755840	1769180672	1463855488	1637757568	163068288	1645578880	1774726528	1678826240	28	28	12	95436	0	32331	Q68EM7;Q68EM7-2;Q68EM7-6;Q68EM7-5;Q68EM7-7;Q68EM7-4;C9IZD3;I3L460;I3L4Y5;I3L4P0;I3L4P6;I3L1S9	Q68EM7;Q68EM7-2;Q68EM7-6;Q68EM7-5	Rho GTPase-activating protein 17	ARHGAP17
13490253	39585452	69386528	51562928	67367240	66287324	31320414	40249132	85536112	54980456	75432504	138039568	74385968	89267520	61228636	6009813	42205912	7022727	45155880	47084840	130472936	98508904	72911200	10777816	0	0	0	0	65258508	61657064	0	0	0	0	6810554	75134224	17	1	1	64266	1	-2	Q68EM7-3	Q68EM7-3	Rho GTPase-activating protein 17	ARHGAP17
8153324	984798	6052476	7868596	7985742	0	34562732	3720937	0	29535132	21029600	30052620	2269363	34226840	11232305	1844584	12677736	30342356	0	12025075	41564660	28393876	3032396	516316	2913386	42229	3434866	2155289	2889165	2938612	57533056	55126820	0	0	32644120	165727	5	5	5	74976	99338	15353	Q8N392;Q8N392-2	Q8N392;Q8N392-2	Rho GTPase-activating protein 18	ARHGAP18
119608944	129754216	55303672	171177024	115287376	187433616	197592448	121631304	152527024	137532768	14846456	170197312	229228480	173361920	149422160	145623440	173150528	15195493	16541228	133511592	127730304	158521392	172672544	102070088	36899864	13872044	368363520	399466112	46904712	45018396	356808032	33907536	93415944	75022832	29941336	82100144	7	7	7	55756	0	20727	Q14CB8;Q14CB8-7;Q14CB8-3;Q14CB8-2;Q14CB8-6;Q14CB8-4;R4GMS4;Q14CB8-5;R4GNI4	Q14CB8;Q14CB8-7;Q14CB8-3;Q14CB8-2;Q14CB8-6;Q14CB8-4	Rho GTPase-activating protein 19	ARHGAP19
226266672	235749488	123224456	16335719	188552992	207880608	212732240	185701984	118965248	192531600	177110016	161663520	148927664	8757494	111921192	76510368	199887792	170715568	1024767	218027168	12095814	109987576	181028784	217233968	230743648	255728224	171923472	235580048	204318768	185916144	24201364	277554176	151864688	205645776	294638304	189790480	11	11	8	84257	0	77307	Q8N264;D6RCP5;Q8N264-3;Q8N264-2;Q8N264-4;Q8N264-5	Q8N264;D6RCP5;Q8N264-3;Q8N264-2	Rho GTPase-activating protein 24	ARHGAP24
0	0	0	0	0	0	0	0	0	0	0	0	0	0	0	0	0	0	0	0	42258836	53843528	6502663	0	0	0	0	0	0	0	35238832	21153586	0	0	0	0	9	1	1	32397	0	13734	B7Z8K7	B7Z8K7		ARHGAP25
1890247168	2168258560	2492251648	2107439616	263937328	2652530688	2473657088	2623185408	2340938496	262652416	2944701696	2657321216	2508400128	24556860	2236480768	2191341568	2820689408	3314529280	2622876672	262461264	2314403840	2555721984	3107304960	2712014080	737577152	833203904	1125008000	537277312	1151648640	576180096	726669120	657980160	1110108544	1204633344	683629568	674880064	22	22	14	73505	0	1031	P42331-4;P42331;P42331-5;P42331-6;P42331-3;H7C4P1;P42331-2;C9JB56;F8WDF6;F8WAV9	P42331-4;P42331;P42331-5;P42331-6;P42331-3;H7C4P1;P42331-2;C9JB56	Rho GTPase-activating protein 25	ARHGAP25
0	0	0	0	0	0	0	0	0	0	12257513	0	0	0	0	0	0	0	0	0	0	0	7397931	0	39465548	43886432	29869212	45238752	4819626	42717944	61997224	53228536	32220744	33675756	31386884	3901553	8	1	1	75029	0	35765	E9PNT2;E9PNX6	E9PNT2		ARHGAP27
97201104	96653144	111179968	70644376	97437992	80071592	71777728	6495786	59651148	65418692	50277816	97132568	8307248	85935480	75750672	88221744	62162992	98225872	56443680	46059508	112463008	62975184	53639516	39576296	54722172	31125600	61319968	59886336	111601128	92148400	88473752	109326816	38315064	49594736	0	67440744	9	9	2	98395	0	83264	Q6ZUM4;E9PIR1;A0A0G2JRG8;A0A0G2JNY3;Q6ZUM4-3;Q6ZUM4-2;A0A0C4DGE6;A0A0G2JP16;Q6ZUM4-4	Q6ZUM4;E9PIR1;A0A0G2JRG8;A0A0G2JNY3;Q6ZUM4-3;Q6ZUM4-2;A0A0C4DGE6	Rho GTPase-activating protein 27	ARHGAP27
113113784	63010448	64707112	49616916	48968584	115366480	134597728	106566912	63210784	115988552	131995032	68726816	107702384	67692760	61825540	85945688	60639288	57917812	86618016	7848016	106815744	58972096	98945344	44336460	173840752	136181376	158704224	179999424	58537536	152504144	105393864	124792336	147223568	143980384	128017640	86031328	2	2	2	14206	1	-2	Q52LW3;F8VWZ8;Q52LW3-2	Q52LW3;F8VWZ8;Q52LW3-2	Rho GTPase-activating protein 29	ARHGAP29
265303056	222820816	219751456	260448176	305920960	270748064	250429936	266761584	291723200	243293504	286454688	245020224	276795584	328876000	283247456	242527776	16131825	18938318	174211088	169894000	168982912	284590336	199514640	139624336	305525568	343238304	289822752	315788832	308460000	305403968	368326944	362601824	287615072	247414112	323687936	322987680	21	21	20	11858	0	32331	Q7Z6I6;A0A0A0MRJ9;Q7Z6I6-2;A0A0A0MRJ8;Q7Z6I6-3;Q7Z6I6-4;E9PLT5	Q7Z6I6;A0A0A0MRJ9;Q7Z6I6-2;A0A0A0MRJ8;Q7Z6I6-3	Rho GTPase-activating protein 30	ARHGAP30
290918368	23291488	193357856	261884192	315497920	177338624	244113936	322351488	280458560	268997920	30716156	337946368	288172096	184588336	201235088	158686256	151323568	271320320	198786976	187000128	192558912	185032288	170850176	141639088	62689904	61783124	104208664	81390528	80644184	33086164	84744696	38298868	75152152	35593284	5828278	40799176	20	20	20	17051	0	52253	Q9NRY4;A2RRE5	Q9NRY4	Rho GTPase-activating protein 35	ARHGAP35
567191360	598603904	726085888	670929728	581037888	509084512	478903456	406683648	343027488	414687456	280128768	483055808	651630848	65404872	609686528	641736448	561291264	783382208	59045884	533071328	45410712	454770624	48922264	468269792	58900376	649799296	637400448	610115968	50346776	464181664	454224064	604188928	317119488	344455808	315301120	294132480	25	25	25	10502	0	32331	P98171;P98171-2;E7EQN5;E9PCM6;A0A0B4J1X7;S4R314;S4R352;C9JLA8;C9J5M2;F8WAR0;H7C2Z8;H7C3K8;H7C3G3;H7C120	P98171;P98171-2;E7EQN5;E9PCM6;A0A0B4J1X7	Rho GTPase-activating protein 4	ARHGAP4
0	0	0	0	0	0	0	0	0	125983	0	144613	0	0	0	3806	0	0	0	0	0	0	2918696	0	8121083	11263986	11356096	9738032	13588824	7752621	5003791	6641709	7538682	2055603	6450134	2759917	8	8	8	17246	70977	1698	Q13017;A0A0A0MSK6;Q13017-2;G3V360;Q13017-3;Q13017-4	Q13017;A0A0A0MSK6;Q13017-2	Rho GTPase-activating protein 5	ARHGAP5
89299248	68147032	9153615	86115224	11376921	89290192	27780996	7076008	96766744	40193496	38441276	48658660	71128928	81738944	79987632	70827392	78705352	46716868	63266668	61769212	11251102	72188000	59877044	7590238	17824894	6761982	32426484	35395460	2935931	40815428	28971544	52963776	23996792	27738308	31294026	32141788	7	6	6	83259	0	12933	Q9BRR9;R4GN15;J3KPQ4;Q9BRR9-4;Q9BRR9-3;Q9BRR9-5;Q9BRR9-2;H0YI36;F8VW89;F8VR90;F8VQR0;F8W1N6;F8VQY5	Q9BRR9;R4GN15;J3KPQ4;Q9BRR9-4;Q9BRR9-3;Q9BRR9-5;Q9BRR9-2	Rho GTPase-activating protein 9	ARHGAP9
2673623040	2543060736	1974962560	2432285952	2380488960	2477102848	2407258368	2752570368	2054532864	2379423488	2312743680	2688994560	2817998336	2679173888	2606299392	2563200000	3022649344	2108407680	2737299456	2751587328	2702326016	2280437504	2700253952	3045098496	2533458176	2803667712	2304603136	2379616256	2743094784	2737362176	2648180224	2441067520	2123485312	2656918784	2287751680	2753651200	17	17	17	23207	0	32331	P52565;J3QQX2;J3KTF8;P52565-2;J3KRE2;J3KRY1;J3KS60	P52565;J3QQX2;J3KTF8;P52565-2;J3KRE2;J3KRY1	Rho GDP-dissociation inhibitor 1	ARHGDIA
0	38482456	12154941	0	0	87436904	29439364	0	0	0	0	0	25227180	0	40329268	0	37623600	0	27445288	17479768	58496140	23957100	55282100	0	0	0	0	0	0	15428567	991204	0	0	0	17361916	13163023	16	1	1	22273	1	-2	H0YGX7	H0YGX7		ARHGDIB
8842295296	7349199360	6654715904	7000918528	6396756992	5735582720	687125888	7612838400	6369986048	57921104	5780793344	607630272	8017373696	7261180928	8762074112	8224684544	8408838656	6805568512	7905783808	8247101440	6313074176	7262773248	6389129728	6157840896	7719859200	7972525568	8585949696	8043422720	7787072000	7656525824	6984300032	5795282432	6958451200	6663955456	6589376000	6180553728	17	17	2	22988	0	32331	P52566;F5H3P3;F5H6Q0;F5H2R5	P52566;F5H3P3;F5H6Q0	Rho GDP-dissociation inhibitor 2	ARHGDIB
1596795648	1509888640	1962693504	1556367232	1940217216	1906062336	1958391424	1590500480	1002794240	1534892672	1205859840	1484713344	1832586368	1802083072	1819297920	1620236672	1912996736	1872429568	1157835520	1503892992	1678372352	1740774528	1541379584	1908030336	2423289344	1665170944	1899096960	2445435648	2127620224	2610483200	2465945344	2923090176	1887690624	1887331584	2034035584	1974491520	35	35	35	10832	0	32331	M0QZR4;Q92888;Q92888-3;Q92888-2;Q92888-4;M0QYC1;M0QZH8;M0R2C7;M0QYS3;M0QXV6;M0R3H5	M0QZR4;Q92888;Q92888-3;Q92888-2;Q92888-4;M0QYC1	Rho guanine nucleotide exchange factor 1	ARHGEF1
0	0	0	0	1030166	0	5570266	1658678	0	0	0	9282726	0	0	178452160	0	0	0	1473937	0	0	0	0	0	183923024	215016048	197652928	146371360	312115968	219771920	0	22113648	264383424	222376464	247042432	177558032	3	3	3	1677	0	35117	O15085;O15085-2	O15085;O15085-2	Rho guanine nucleotide exchange factor 11	ARHGEF11
117566360	61342632	80760128	95350328	89942536	90684856	115494848	142205648	80859624	74653240	7736418	85566448	114464792	112381872	94225072	87030880	11864087	80978808	89819952	124133760	103229208	64692432	125246112	82768024	76075056	89201904	87005056	75797408	78914952	91393440	82268456	80651816	65767800	29424062	51460588	48890812	15	15	15	13078	0	11665	Q6ZSZ5;Q6ZSZ5-2;M0QZS0;A0A087WZG4;M0R150	Q6ZSZ5;Q6ZSZ5-2;M0QZS0;A0A087WZG4;M0R150	Rho guanine nucleotide exchange factor 18	ARHGEF18
1436905088	1349234944	1128689152	1077366016	1621857920	1421268480	1370654592	1610046720	1161725440	1494644992	1364884992	1424456960	101330040	1562074496	1204921600	1371663744	1369240832	1682546176	1288659968	1787402240	12389781	1428426496	1750972928	1612262912	139710784	1369417856	1077963776	1625579520	1802996736	157477344	2089006848	1963603712	1294104576	1436292608	1547604224	1467562880	36	36	25	11154	0	32331	Q92974;Q92974-2;V9GYM8;Q92974-3;Q5VY93;V9GYG5;V9GZ14;V9GYF5;V9GZ58	Q92974;Q92974-2;V9GYM8;Q92974-3	Rho guanine nucleotide exchange factor 2	ARHGEF2
0	36394632	44959848	31538072	0	39312704	0	43487448	28044534	64037644	63185256	0	31436892	30363348	45513444	2222288	4148076	49972616	68424568	39572288	56116744	54450232	53366052	90550680	62212024	84298184	60898564	119878160	101010280	105739352	113705952	155927392	107098384	110818416	84866824	86421040	12	1	1	29366	18038	28323	V9GYF0	V9GYF0		ARHGEF2
14757102	56444	15810939	9761878	8909235	10158365	4861489	45306	44753512	25444848	27441956	10909077	35970932	45236120	33093484	48200388	10572601	8256699	41249780	17348952	53882548	35799688	3909982	19708544	25551352	27236508	29266454	35796424	20940936	26474740	3028953	36127176	28700788	34625736	3165634	0	5	5	5	16466	15876	65444	Q8TER5;Q8TER5-4;Q8TER5-3;Q8TER5-2;G3V485;G3V3N2;G3V5C1	Q8TER5;Q8TER5-4;Q8TER5-3;Q8TER5-2	Rho guanine nucleotide exchange factor 40	ARHGEF40
277697152	192717568	24710940	182195360	320653536	215628160	284846624	216426192	20595428	283968576	220944672	218466944	279336192	315309952	249195040	231736608	367438720	319710464	3061265	328099424	281662080	312797184	405761696	289975232	662481536	527815520	592706496	678567424	543365440	564781568	578730880	691588928	623835008	526692576	585703552	640182208	19	16	16	87498	0	39315	Q15052;Q15052-2	Q15052;Q15052-2	Rho guanine nucleotide exchange factor 6	ARHGEF6
158391392	1565718272	1304859264	1196904576	1289806080	1391422336	1344724224	1433852800	1213787520	1599393152	1183631488	143856160	1929795328	137235328	1374558080	1590317696	1900697728	1306336384	1792994304	1816403456	962307328	1022954624	1365994752	1011721984	767388160	1002571776	656790592	725771456	827454336	784484288	674684544	572957376	715790016	704061312	531237088	451694112	21	21	18	73139	0	18182	Q14155-1;B1ALK7;Q14155-5;Q14155-6;Q14155;Q14155-2;Q14155-3;E7EUY6;E9PDQ5;F6SJA5;E7EU80;C9JAD7;C9JDI6;B1ANY6;E7ENL8	Q14155-1;B1ALK7;Q14155-5;Q14155-6;Q14155;Q14155-2;Q14155-3;E7EUY6;E9PDQ5	Rho guanine nucleotide exchange factor 7	ARHGEF7
306567104	349240832	290297152	380535456	404052096	424932224	469548736	424591840	374243968	494547904	441371200	489158080	432588480	439857248	480571616	443046912	479297088	502537760	482634592	499745280	404123808	489057376	547712704	382066208	49036932	46982288	381908032	520604864	480199904	562343232	574430208	620505536	471509600	496231136	498527936	446337504	48	48	46	24204	0	32331	O14497;O14497-2;O14497-3;H0Y488;A0A087WUV6;H0YCU6;E9PQW6;H0YEW5	O14497;O14497-2;O14497-3;H0Y488	AT-rich interactive domain-containing protein 1A	ARID1A
30997716	29503192	78802640	51235112	84185704	6022411	52223764	61706120	41757820	56784964	46825872	7290302	49327928	53363064	37235964	50451992	58398504	45276904	38363044	58254036	2794314	43922712	65762808	55033936	54523004	64973988	4911173	72311928	178995232	38985404	58845560	65736776	58830492	43335212	41880412	28472272	35	33	33	23612	0	181	Q8NFD5;Q8NFD5-3;Q8NFD5-2;H0Y7H8;Q8NFD5-4;H0Y2R3;H0Y3S9	Q8NFD5;Q8NFD5-3;Q8NFD5-2;H0Y7H8;Q8NFD5-4	AT-rich interactive domain-containing protein 1B	ARID1B
170940144	291300128	218581184	161545264	18864688	251083712	319242016	168514704	170529648	278020832	23416234	234676736	193323440	203237984	191540400	161722480	222641424	262423264	181666592	174733568	159522016	193529136	170242224	189416208	175700976	166330352	113939352	129513584	175025984	142565040	162187120	167124448	139909008	112237232	6069861	97177272	24	24	24	19739	0	20217	Q68CP9;Q68CP9-3;F8WCU9;F8W108;F8VWP4;A0A087WY37	Q68CP9;Q68CP9-3;F8WCU9;F8W108	AT-rich interactive domain-containing protein 2	ARID2
1947854592	959096128	1170260480	1023752960	1564622592	1094034688	480830048	413316512	1665063168	1693400704	849057152	1835361536	959278976	1380304896	1664514048	1308769920	1053657024	1767387520	895259904	1278839936	1296590080	1239378048	1221477120	1106275200	1610316800	2741602048	4179944960	2370385408	1285017472	1353019648	1191916288	1182647040	1661370240	147399600	1829539840	1555857152	11	11	10	62888	0	60776	Q99856;K7EJ04	Q99856	AT-rich interactive domain-containing protein 3A	ARID3A
4608363	0	59230016	5318916	70992128	67266864	12125538	84725248	34604280	65073352	70885688	61526364	40774812	79367440	15979305	67794112	46563820	50158616	16098586	41692484	81668832	70783528	78915976	86698960	252559408	160578480	16474972	214318576	201289248	189240528	236829680	299865664	162628064	11952435	243231376	159878592	10	9	9	60636	0	11493	Q8IVW6;Q8IVW6-4;Q8IVW6-3;H3BQ92	Q8IVW6;Q8IVW6-4;Q8IVW6-3	AT-rich interactive domain-containing protein 3B	ARID3B
77597176	50847844	110316144	196190512	84170248	62470352	331737376	128250600	401160384	9448811	319430304	358088704	258400160	96124008	113527144	15527298	84472280	5843493	103646840	100611128	87800984	72175816	127492936	48535776	20143064	3314898	47271844	35591636	22841212	27948996	29369806	19648248	286419	38431800	68343768	31628560	15	14	14	14275	0	62094	P29374;P29374-3;P29374-2;C9J1W3;H7C485;F8WAR5;C9JIF4	P29374;P29374-3;P29374-2	AT-rich interactive domain-containing protein 4A	ARID4A
164252704	125627328	97326880	116413552	202265472	132543536	133600472	197118304	80658736	137901680	129737904	147178176	275861952	187820256	196845632	228952720	212062112	179600032	240001696	231907072	110899344	179423216	168372816	106277544	257506080	100269112	161136000	165717936	209324784	16452719	100324768	150060368	124348304	85820768	117830544	88682840	24	24	23	14781	0	80825	Q4LE39;Q4LE39-2;Q4LE39-3;Q4LE39-4;X6RCR8;H0Y7Y8;H7C5R6	Q4LE39;Q4LE39-2;Q4LE39-3;Q4LE39-4;X6RCR8	AT-rich interactive domain-containing protein 4B	ARID4B
289183776	346181376	405534368	359023616	50511404	453193472	514383232	324404736	415851200	543924672	474323136	436181312	39992032	348024640	329052448	306877120	342237984	541879424	361796512	325924864	496172800	494060256	324990688	206975776	394422176	477028704	380873824	582961280	330606336	431258624	506995936	671202752	298537888	330572064	515132384	643041792	5	5	5	64117	0	10711	Q9Y4X5;A0A087WT96;H3BSK4;H3BNB9	Q9Y4X5;A0A087WT96	E3 ubiquitin-protein ligase ARIH1	ARIH1
408432608	456416480	264326576	345556576	256939808	279046400	352261824	343468416	183695456	231318160	377202304	27628344	302587392	189424080	727976512	512113632	278586560	311378112	425974496	244519584	341459968	271928256	3620559	23337748	418422272	32746592	265074768	340324992	279684800	226088928	179211056	98755224	540625600	373247872	246281152	214977984	5	5	5	57818	0	43711	O95376;C9JZ71;C9JCL4;F8WCS4;C9JBC5	O95376	E3 ubiquitin-protein ligase ARIH2	ARIH2
1879638912	1741565056	2256847104	270452672	2329529856	1718711424	1059644480	1184316288	2131569152	114461008	124731792	1070892992	139627216	1532811136	1889977344	1846513280	1424227584	11341556	2405954304	1911015680	1737907584	1339491712	869189056	1704525952	3256236800	2602071808	3242768640	2532788480	1911612928	1620179584	1841618688	2279907584	2591794432	2819599104	2618263296	2965858304	6	6	6	20417	0	12114	P40616;P40616-2;F8VYN9;B4DZG7;F8VP99;F8W1Z8;F8VP63	P40616;P40616-2;F8VYN9;B4DZG7	ADP-ribosylation factor-like protein 1	ARL1
0	0	0	0	0	11593495	11184157	0	0	0	0	0	0	7791499	1385869	10469825	10067506	13668212	0	0	596618	7774459	9403458	8265984	0	0	0	0	5817449	0	0	0	0	0	13253172	8680551	1	1	1	48643	88507	16204	Q3SXY8;Q3SXY8-2;Q3SXY8-3	Q3SXY8;Q3SXY8-2;Q3SXY8-3	ADP-ribosylation factor-like protein 13B	ARL13B
242808688	220891632	221683232	155301536	231201168	171424352	188282784	188897872	13976873	47413720	68855184	170311456	141995872	16213415	207600896	199687568	62881196	145231584	12402699	118267352	22582032	8387283	109847824	76681568	181145920	388054944	223640528	271269600	175072304	231800416	102804808	114737248	24280144	51375248	80151608	6213286	3	3	3	29337	15576	58711	Q8N8R7;E9PRK7	Q8N8R7;E9PRK7	ARL14 effector protein	ARL14EP
0	58912976	46174356	55274828	56524320	62213932	62046948	53198720	83695528	79308656	0	0	50189824	67346912	0	49871192	53670128	17574806	0	0	42180776	0	91130528	0	8308086	76293008	96848328	91219960	0	89107856	103395776	75091296	0	95027632	9170293	9264456	1	1	1	22876	99388	15398	Q9NXU5;A0A0B4J222;A0A087WUW9	Q9NXU5;A0A0B4J222;A0A087WUW9	ADP-ribosylation factor-like protein 15	ARL15
1600427392	135758784	506080768	622125312	768992896	547969024	578176896	981094656	131028816	772030912	744180032	819497472	1029245696	594577152	862929600	279273152	1013373568	638343360	1111244160	634216256	506958784	289347840	77014736	582740352	72127064	627054912	484809088	585357760	473760640	817076992	74935136	363335872	668254400	1111632768	684486336	1032120704	11	11	11	20878	0	24926	P36404;V9GYD0;P36404-2	P36404;V9GYD0;P36404-2	ADP-ribosylation factor-like protein 2	ARL2;ARL2-SNX15
333527776	754510784	758007936	686373888	901754432	65944672	530751328	581184768	297170080	692293248	653306368	660980800	578204224	772481920	757170880	457767232	47798852	469153824	915427968	601480320	393452576	666704320	652413632	597373376	394591552	857785088	473339424	565898496	111845640	172699200	15199727	151774032	208148576	699123520	995917824	90961000	5	5	5	18822	0	1199	Q9Y2Y0;Q9Y2Y0-2;H3BU49;H3BM52	Q9Y2Y0;Q9Y2Y0-2;H3BU49;H3BM52	ADP-ribosylation factor-like protein 2-binding protein	ARL2BP
2762913792	2356278784	2037483904	2751294976	2533001472	2569743616	2705574656	238051872	1807276672	2428229632	2476663040	2094332672	281659328	2250188032	2708376832	2370986752	2765067520	2644511488	297198144	2332681472	1693206016	1806381312	1816493056	1554431488	3535202816	3472586752	3045604608	3632763648	2723220480	2856311040	2383111424	2468422656	1997409408	1966846720	2431144960	2318032640	10	10	10	20455	0	32331	P36405	P36405	ADP-ribosylation factor-like protein 3	ARL3
34068984	7115309	244082208	82688928	185702128	50242640	162392000	36698404	79104328	56441776	71033040	48674080	7312468	74554512	5011157	62661100	46295948	44314592	44449000	72575696	385118912	40120456	108630808	354464448	459325760	386780672	26545668	453701568	408584352	86283104	378471104	351742112	540975232	395380160	12943673	133138384	4	4	3	20728	43796	39357	Q9Y689;Q9Y689-2;F8WER2	Q9Y689;Q9Y689-2	ADP-ribosylation factor-like protein 5A	ARL5A
30863288	32371042	0	3185753	80792624	240432	0	68014496	0	34566632	83413008	37895480	92986208	0	0	52878700	63011452	72467176	38281960	68989160	420866048	23579162	60488136	480123552	0	0	0	0	0	0	0	0	37563044	30309266	24607040	53737064	3	2	2	20374	21951	26238	Q96KC2	Q96KC2	ADP-ribosylation factor-like protein 5B	ARL5B
0	0	0	0	0	0	0	0	0	0	0	0	0	0	0	0	0	0	0	0	0	0	0	1697659	73668928	16512465	17019578	19324086	19779148	19475696	76112160	71296208	92129368	19119580	74035824	27795924	3	3	3	21097	2706	2372	Q9H0F7;Q9H0F7-2;C9IZ13;H7C5H6	Q9H0F7;Q9H0F7-2;C9IZ13	ADP-ribosylation factor-like protein 6	ARL6
239376384	62607480	37787064	198341248	193896304	204878768	561406592	436125696	289615392	583168192	299364192	513888000	303468416	479636256	543357056	44895496	601795264	300636288	312037920	27371328	457958176	571900992	32436892	874473728	488276160	509773664	54500432	498272896	517533664	75270928	393526528	616883584	616581824	474556448	819443456	487268064	5	5	5	44915	0	72761	Q66PJ3;Q66PJ3-2;Q66PJ3-3;F5GYV5;H7BZV4;A0A0C4DG62;F8WCT1;Q66PJ3-7;Q66PJ3-4;F5H7X4;F8WEP2;A0A0C4DH18;Q66PJ3-5	Q66PJ3;Q66PJ3-2;Q66PJ3-3;F5GYV5;H7BZV4;A0A0C4DG62;F8WCT1;Q66PJ3-7;Q66PJ3-4;F5H7X4	ADP-ribosylation factor-like protein 6-interacting protein 4	ARL6IP4
593430208	982010944	78485096	8214177	1110112128	636383168	864648896	77868384	594806080	1048046784	975153664	989290752	1304461568	622795968	855405888	874558144	792710592	631711936	174037648	1207588480	723184704	1168551808	1403746688	1131353856	1551601792	918077056	111060544	728441920	1673910528	2253251072	149098640	510391584	1425412992	1179792000	79908080	1481250688	6	6	6	21614	0	80125	O75915;F8WF90;C9JQU6;F8WF33	O75915;F8WF90;C9JQU6;F8WF33	PRA1 family protein 3	ARL6IP5
159644848	61078468	64176676	4275047	13234889	79463128	95612400	327012512	124218856	178384256	143695312	209204512	6842873	111148640	48858456	74617152	75718400	122773888	30061160	6272265	89618064	102799664	116665056	63874540	118910672	136203424	156310816	111544968	124930752	92512760	13627911	159462576	10203817	83337888	109949680	85882464	5	5	5	24676	15434	55834	Q8N6S5;H7C192	Q8N6S5	ADP-ribosylation factor-like protein 6-interacting protein 6	ARL6IP6
4791795200	366843008	4245315584	3834264576	6407954432	4807291904	5486491136	40087988	4693660160	679209280	5730970112	6853033472	4178605312	3729047552	3507457280	394378336	4857766912	6452341248	4637878272	4481411584	7042527232	6141043200	466643008	493813120	2905061120	2859953920	3736617216	2923282688	3580806144	3236259840	4425128960	3967714048	3448386048	3506171392	307014208	4058843392	10	10	6	21416	0	59368	Q96BM9;A0A087X2J2	Q96BM9;A0A087X2J2	ADP-ribosylation factor-like protein 8A	ARL8A
3363202816	2812655616	2743961600	3420720128	2630283264	3204183552	2589945088	355137024	3282962688	425559104	3357104384	4520133632	4288040704	1406110336	1697571456	140818320	458055072	3638093824	4083746816	3575447296	2673564672	3250152448	3931850240	1450498176	3568535808	3428876544	408831776	1390177408	3281854464	3059542528	2911722496	2480656640	357033888	2833362432	1243170176	1714024064	7	3	3	21539	0	4418	Q9NVJ2;Q9NVJ2-2	Q9NVJ2	ADP-ribosylation factor-like protein 8B	ARL8B
703914752	474157696	487687104	510310784	453208128	636668416	567063808	669623104	413248192	550572416	550058816	580902080	501089568	514216000	550177088	483678048	757218944	667022848	584600000	646043648	252059904	354032960	803813760	54484944	637680896	61094024	565648576	626081728	668103936	659370112	58892092	665445184	517376480	649921536	654233216	595789632	7	7	7	3128	0	64233	Q9NVT9;E5RJ86;E5RHK3;E9PR92;Q9NVT9-2	Q9NVT9;E5RJ86	Armadillo repeat-containing protein 1	ARMC1
527901728	68930416	640987328	768665664	623470848	537817408	505512288	566403264	291527392	41664064	583769792	584443072	707591808	535771040	519645568	705805248	410789824	593448320	767252224	583550464	511122848	371633248	418329440	386444384	332185632	39048552	42354492	356459904	324210752	352774592	361461440	361444192	253476816	374165696	269435840	341132096	8	8	8	3754	0	12303	Q8N2F6;Q8N2F6-2;Q8N2F6-4;Q8N2F6-3;H7C2M7;Q8N2F6-6;Q8N2F6-5;C9J5N7;H7BXQ8	Q8N2F6;Q8N2F6-2;Q8N2F6-4;Q8N2F6-3;H7C2M7;Q8N2F6-6;Q8N2F6-5	Armadillo repeat-containing protein 10	ARMC10
11967595	15999709	36333792	16767877	28572420	1989414	11917423	24167994	29545028	14653547	48217936	17908780	32264716	0	27977928	0	23744628	15700894	8405484	7141768	32910684	26479732	0	34054216	12849767	20526398	42954512	17243820	33906564	35911204	37221448	45012644	61121640	37532452	76408600	51730752	5	5	5	9768	1642	78241	Q96C12;J3KQ26;Q96C12-2;H3BS74;Q96C12-4;Q96C12-3	Q96C12;J3KQ26;Q96C12-2;H3BS74;Q96C12-4	Armadillo repeat-containing protein 5	ARMC5
0	0	0	0	0	0	0	0	0	0	18089708	1451913	0	0	0	0	0	0	0	0	26073056	0	0	0	0	0	0	0	0	0	0	0	0	0	0	0	15	1	1	44118	1	-2	B4E1N1;F5H6J3	B4E1N1		ARMC6
847966976	1097529856	1130396032	956623488	75655696	110590176	1189429760	683588032	1092265088	1075086464	1601808896	1443262848	984552128	105802480	687003648	879038400	1415294848	1039079232	1041772672	944116096	1308961152	1436492416	1366790272	1494899840	1238294912	723676864	1257345792	937784448	1615530496	1601684864	1856149888	93866288	806821184	849414208	99863840	948054912	18	18	4	54141	0	12233	Q6NXE6;Q6NXE6-2;F5H4P3;F5GWV0;H0YH65;F5H2X2;F5H2K4;F5H052;H0YGL0;F5H3X1;F5GZP0;H0YGQ5;F5H7V0	Q6NXE6;Q6NXE6-2;F5H4P3;F5GWV0	Armadillo repeat-containing protein 6	ARMC6
72768432	6673221	0	6627173	10698775	81469200	0	97702816	9091316	64427852	102440664	49103936	7377514	7835615	25862844	48696536	42811004	42233832	61015864	9200492	24134016	26753144	45589016	14264226	28493632	0	0	4402929	0	0	27637080	0	0	5854552	0	0	14	1	0	67185	1	-2	B7Z637;Q8IUR7-3;C9J8P8	B7Z637;Q8IUR7-3	Armadillo repeat-containing protein 8	ARMC8
22169856	19589316	0	27304232	0	32328888	25418228	23432480	27628664	22780032	26888876	19841848	21945594	23020752	2909795	19718424	4517168	26882206	33851480	28415982	18953526	29167694	54236120	52217432	0	0	0	0	37927036	0	41689896	0	31469304	34440016	26053066	16587437	9	1	0	44499	16488	80197	G5E9V6;Q8IUR7-6;C9JAA7;C9JBY2;H7C5B7	G5E9V6;Q8IUR7-6	Armadillo repeat-containing protein 8	ARMC8
406954240	369891200	402104992	46062072	442461184	402003392	381184576	295112224	358193728	362032064	362478656	372437024	324972352	335094976	414289856	464187616	293151360	391295328	322457216	312001760	365239488	403937696	310618016	428326048	20378492	199869312	212584656	220866864	214118304	168228176	288644672	279686144	303369696	287601440	23452456	220443904	15	15	0	75509	0	1288	Q8IUR7;Q8IUR7-7;Q8IUR7-2;Q8IUR7-8;C9J2I1;H7C4J4	Q8IUR7;Q8IUR7-7;Q8IUR7-2;Q8IUR7-8	Armadillo repeat-containing protein 8	ARMC8
20251252	6248847	7342133	6239361	7290749	3273919	22390184	7471215	4352606	15900977	26073128	24877514	28711156	3823608	3759891	2825265	0	19621308	11475645	14070151	0	0	0	1648315	5128911	0	5932807	0	9608798	4620558	0	0	4811139	0	0	6015068	4	4	4	91761	29698	23432	Q7Z3E5;A0A087X1I8;Q7Z3E5-2;H7C3U7;H7BZY2	Q7Z3E5;A0A087X1I8;Q7Z3E5-2;H7C3U7;H7BZY2	LisH domain-containing protein ARMC9	ARMC9
840447232	968384320	860621440	1149818240	1237275136	1352514304	1149941120	12639746	1105016704	1173469056	1020482624	1136097664	1059267200	1240496640	1245931136	1310570624	1067014784	1238342144	1001621888	1187615488	1250122496	1165034752	906316096	974612928	1435091328	1474502528	1433290112	1533587584	1711606784	1372879488	2123775360	1782056064	1566815872	1678343424	2037318528	1492073216	11	11	11	425	0	47294	Q9UH62	Q9UH62	Armadillo repeat-containing X-linked protein 3	ARMCX3
383271104	408331808	474382752	439455744	548102272	633317696	590317632	426324096	587823232	551312192	592494592	660118336	430410304	307819200	431093312	400972000	718177856	497204032	425382048	526638688	288622144	60660752	546583040	780489600	312638880	357207616	603211392	515498336	625814912	572314560	54126228	402160608	683807360	689566464	76223600	783451712	10	10	10	51172	0	83511	Q9H993;F5GZY1	Q9H993;F5GZY1	Protein-glutamate O-methyltransferase	ARMT1
896188	1485292	11045062	18367100	20204980	16039971	34477980	26253440	40840216	44908444	0	25299184	27535008	2655533	21575896	2654975	41052816	30931064	10194983	10900782	24070308	22493000	25007548	39637344	5907004	24341196	8646253	9125649	4879065	24401524	3375523	5811615	21153434	0	5042358	2991171	6	6	6	86636	0	57777	P27540;P27540-3;P27540-4;P27540-2;A6NGV6	P27540;P27540-3;P27540-4;P27540-2;A6NGV6	Aryl hydrocarbon receptor nuclear translocator	ARNT
417886400	352903168	514103872	1671338752	1458601728	1664661504	201503872	27987312	269604800	286830944	454486016	434312160	169549904	1849367040	258482080	2499765504	1842870528	1768183552	2052016640	1721775872	197503488	233369008	373345536	335416992	566812160	717182784	510290752	463404192	528871520	877980736	950126144	1054707648	765594048	948301376	842875776	819048704	10	9	9	41569	0	16961	Q92747;E9PF58;Q92747-2	Q92747;E9PF58;Q92747-2	Actin-related protein 2/3 complex subunit 1A	ARPC1A
1026147520	1070332416	9773675520	1032082880	8945176576	1133555840	883553536	1079730944	5640758784	100342176	9050353664	9553545216	117635808	1056072000	6343133696	1040024576	114576528	1116670336	1149227136	1005362048	8115012096	1038674048	1037933248	6600791040	5757274112	612704128	6499695616	6754882560	6814567424	3592736256	3947949056	6498376704	475073120	6363510272	4977632256	5539002880	15	15	14	40949	0	32331	O15143;C9J4Z7;F8VXW2;C9JEY1;C9JQM8;C9JFG9;C9J6C8;C9JBJ7;C9K057;C9JTT6;C9JM51;F8WEB3	O15143	Actin-related protein 2/3 complex subunit 1B	ARPC1B
2258566656	2264546304	2299176960	2426317056	2293120768	2017864832	1939218304	1796979456	1931475584	1784245248	1990768256	1712556800	2140802432	1907809152	2213099264	2183060224	1994719104	2131556864	2474445824	2025618944	1932369536	1951136384	1919823488	1926195968	1817443840	1937116672	1800718720	197658128	2151920896	1796297088	1876862336	2078453632	1797445376	1879587328	1973190784	1763871232	23	23	23	34333	0	32331	O15144;H7C3F9;C9JTV5;G5E9J0;G5E9S7	O15144	Actin-related protein 2/3 complex subunit 2	ARPC2
948461312	9189577728	8496071680	832117696	7779360256	1023531584	7840592384	9258920960	9248742400	1074366592	1123633152	111951192	1047347008	1228138752	9872820224	1055361472	1167595136	1178833536	1028886912	1083833088	1308521216	1176803328	1018261376	1276039552	4896399872	5648421888	4650190848	6711976448	6026397184	7488178176	6128135680	7411367424	6395598848	6109243392	7290614272	5191531008	8	8	8	20546	0	15178	O15145;C9JZD1;F8VR50	O15145;C9JZD1;F8VR50	Actin-related protein 2/3 complex subunit 3	ARPC3
1965660416	2303990528	282440448	2531780864	2456506112	2204266496	2082233088	2370030080	2082753792	2343047168	2507243264	2091209600	1895586304	2296325376	2104654080	2277312256	1644073856	2184825088	2140536320	1804328704	2472164352	1862170240	1981291648	211281808	1545912704	174285504	1472689152	1629091584	1572958080	1595390848	1948814720	1472148352	147171888	166664192	1441060608	1667363200	10	10	3	19667	0	77219	P59998;F8WCF6;P59998-3;H7C0A3;R4GN08;P59998-4	P59998;F8WCF6;P59998-3;H7C0A3	Actin-related protein 2/3 complex subunit 4	ARPC4;ARPC4-TTLL3
2005782784	2090705024	2303019776	1852296832	2172163840	202794768	2112328704	1993441024	1875601152	1776327680	1822896640	1963281536	238286224	2657739776	2076642432	2285212416	2425439744	2391104512	1957860224	1993538944	2326315776	2222297856	2026945408	1637029120	1647812352	1613610880	1297748608	1825952256	133701152	13601893	141942544	1636403584	1413287808	1228680064	1628771968	1447761664	7	7	7	1632	0	13403	O15511;B1ALC0;O15511-2	O15511;B1ALC0;O15511-2	Actin-related protein 2/3 complex subunit 5	ARPC5
3399176960	4211696384	5595206144	4734003200	4519038464	4225402880	4007092480	3293846272	5163769344	3510071808	4934974464	4506023936	4806603264	470950656	412103776	4818391552	4320985600	573393152	5098413056	4038872832	6964701696	5351806976	6722713088	6335747584	2480576768	2504982784	1963810048	2172645632	3252880896	2556424704	2705110272	3080816128	2592728832	2402554112	226081792	3227894016	9	9	9	16941	0	13169	Q9BPX5	Q9BPX5	Actin-related protein 2/3 complex subunit 5-like protein	ARPC5L
3629884928	4663890432	35086792	2686018560	3804340736	2897506304	3964177920	2890313984	2721179392	2992819712	4881113088	3476106496	286032256	2940785664	238275232	2395266048	3039710976	2588820736	3191327232	3314435584	205892704	1907287040	2009582848	1947458	5233100288	3772103168	4055047936	3361087232	4066696704	5231479808	3796564992	4872353280	4121743360	4124706816	3894145280	3504445696	7	6	6	12323	0	31766	P56211;H3BMD8;P56211-2;H3BTD3;H3BQ52	P56211;H3BMD8;P56211-2;H3BTD3;H3BQ52	cAMP-regulated phosphoprotein 19	ARPP19
121092008	81100376	214010336	18507214	249938848	159052752	86141976	158500496	181941360	216798880	159581200	32578274	134343792	157380848	140126880	170623248	236443040	196998544	15609157	17606546	89971616	144462784	203498400	8792993	465610496	36262572	453183808	397914944	657046080	275368736	330215296	319519552	328564640	369714656	438011072	608368448	11	11	11	46105	0	77082	P32121;P32121-3;P32121-4;P32121-5;P32121-2;K7ENA6;I3L412;Q68DZ5;I3L0V6;P49407;P49407-2;K7EL17;E9PM35	P32121;P32121-3;P32121-4;P32121-5;P32121-2;K7ENA6;I3L412	Beta-arrestin-2	ARRB2
192498672	217710656	2716658	225579520	313746560	208653584	25830400	178254272	216229312	240805824	98636008	241695568	266840528	545302208	478839040	414665056	87914008	450445184	13509845	463166080	429040992	48147512	352138560	634056128	269188416	262268544	9789383	0	27535972	0	0	0	0	0	0	1258714	5	5	5	45981	0	27766	Q8N5I2;Q5T370;F2Z3I4;Q5T371	Q8N5I2;Q5T370	Arrestin domain-containing protein 1	ARRDC1
8266179	482198	0	12423734	0	12178987	30125028	0	45732356	0	0	0	44164088	35242912	52230748	0	0	1890204	0	0	19529744	0	0	0	60277488	16371431	16361437	6010983	20839052	31971564	51212932	18873636	32974324	21129948	33081028	20227512	3	2	2	53806	57929	373	A0A0C4DFZ2;P15289;P15289-2	A0A0C4DFZ2;P15289;P15289-2	Arylsulfatase A;Arylsulfatase A component B;Arylsulfatase A component C	ARSA
57409364	56534868	22365928	48977892	62657972	50158604	84980184	43277988	94207992	87170232	48598052	84381808	40522352	59319908	52436584	55793272	86014592	98095968	7168082	70901520	65960496	79811680	81097440	7543237	12774354	10391459	12085859	9146102	25790376	20252776	49431188	39834732	43126400	41428228	24312126	0	5	5	5	59687	15156	4994	P15848;P15848-2	P15848;P15848-2	Arylsulfatase B	ARSB
44966852	78400200	77001640	74515904	60045140	52677948	63197412	64376296	58546528	44024744	28455122	4104394	77836304	22070518	32955324	49830056	0	38041288	56675380	55325032	0	0	0	0	23427452	0	0	0	32328154	14747808	5358183	2357567	16212875	17375380	17754448	16420887	3	3	3	6145	25812	24189	Q6UWY0;E9PGI0	Q6UWY0	Arylsulfatase K	ARSK
646607872	564068544	661725824	672847488	545689024	528900128	541850176	477598464	47399084	59070100	408115328	613960000	47820728	639999488	544584576	568662080	391614688	770121344	437082944	430375488	504611872	473904640	205410768	1655059	98997440	10156377	120901704	11247477	24891552	0	54275768	61828272	9241599	33683476	34401332	0	10	10	10	41747	0	51374	Q9HBK9;A0A087WVD4;Q9HBK9-2	Q9HBK9;A0A087WVD4;Q9HBK9-2	Arsenite methyltransferase	AS3MT
188281040	203785184	14953634	194966528	21979642	217322864	140685536	169227264	190212848	2057176	200730608	172018208	174895744	200081792	182731840	155388832	184307360	294910976	184502816	135257904	206041088	181995168	220697744	11318975	198103216	255379040	109707136	229289408	322549280	179922240	320697248	295923232	385537920	364524480	309434272	425336192	9	9	9	44659	0	13053	Q13510;E7EMM4;Q13510-2;Q13510-3	Q13510;E7EMM4;Q13510-2;Q13510-3	Acid ceramidase;Acid ceramidase subunit alpha;Acid ceramidase subunit beta	ASAH1
12507048	30962416	28611520	30171076	8568531	2275806	31465436	38786724	19337578	38208128	4735967	51076648	60538404	21405638	43302164	2201743	41305572	40928200	45333800	27046088	24689560	36918148	34261288	26189984	192194	0	29758280	27402988	30445188	27194148	42228828	10021999	35125784	29998274	40320364	27957340	16	16	16	1255	0	11514	Q9ULH1;A0A0A0MRE5;Q9ULH1-2;H0YBF7;H0YBM4;E5RHD7;O43150;O43150-2	Q9ULH1;A0A0A0MRE5;Q9ULH1-2;H0YBF7	Arf-GAP with SH3 domain, ANK repeat and PH domain-containing protein 1	ASAP1
9289301	9123185	0	0	0	0	0	0	0	0	0	0	0	0	0	0	0	0	13478787	11450638	0	0	0	20304736	46275800	37572204	36115332	41725632	17667676	35992704	49160912	24077988	49694496	44857216	21361066	37521044	2	2	2	57745	15359	29575	Q9Y575;H7BYZ6;A0A0A6YY97;A0A0B4J1W5;A0A0A6YYF3;Q9Y575-2;Q9Y575-3	Q9Y575;H7BYZ6;A0A0A6YY97;A0A0B4J1W5;A0A0A6YYF3;Q9Y575-2;Q9Y575-3	Ankyrin repeat and SOCS box protein 3	ASB3;GPR75-ASB3
129063408	22791996	21199412	30834404	41041908	42821940	64786432	32231384	48623264	42426116	54252948	21794082	28736160	12122707	51008840	0	36358300	6312804	77868504	18408944	57669360	1934102	39478600	61308136	88857024	77820848	58060736	46460264	128050328	147498704	4951856	85896672	200488384	201375888	244269168	296705088	7	7	7	47135	0	13294	Q9NWX5;F6TX30;Q9NWX5-2	Q9NWX5;F6TX30	Ankyrin repeat and SOCS box protein 6	ASB6
224146576	230936816	305807712	218569696	418436320	302826176	27267096	332345792	334138080	206954400	421119584	180174000	329047232	383326720	233231984	201885008	203746640	426209120	275569856	206626224	170385360	347297280	408348640	311745024	53479732	413258400	507942336	514626464	327317728	587733568	374339488	462899872	325046016	417448064	370240544	494229344	10	10	10	41227	0	16091	Q8N9N2-2;Q8N9N2;H0YCB3;H0YE76;H0YER2;E9PM82;E9PR40;E9PQZ6;E9PKM6;E9PQ44;E9PJM2;E9PL92	Q8N9N2-2;Q8N9N2;H0YCB3;H0YE76	Activating signal cointegrator 1 complex subunit 1	ASCC1
4686449	3990988	40170452	28068100	3098473	41142988	4963779	28902220	42955104	64592168	42626644	59818264	39738208	2324442	22048644	49465992	29065814	27521580	30499212	5476256	81897376	14882403	42888480	24156572	77316336	53129352	80128944	62190388	88657024	73509224	42510160	87895992	84847216	6247873	98483544	86842824	8	8	8	86359	0	32836	Q9H1I8;Q9H1I8-3;Q9H1I8-2;B1AH59;F2Z2W4;F8WAQ6	Q9H1I8;Q9H1I8-3;Q9H1I8-2	Activating signal cointegrator 1 complex subunit 2	ASCC2
55062324	41661984	74772240	56919596	71020080	68582824	12387548	62585136	71026952	59963632	76622544	8241685	72938104	83230232	69791376	68972672	82751560	10865401	63637672	74008512	112230928	101101088	102987472	86700328	118858768	147262864	152475744	160738992	127954832	161860496	12383166	14371441	15198812	134777792	182439936	158295040	38	38	38	25146	0	89033	Q8N3C0;Q8N3C0-4;E5RFZ0;Q8N3C0-3	Q8N3C0	Activating signal cointegrator 1 complex subunit 3	ASCC3
1165966848	1635762176	1554006272	1436514560	1420933376	1453315072	3431459072	4569462784	1475705216	1804439424	1997344640	1639765376	2043404800	1254827264	1455214848	1390270976	360773792	1797140352	1694190208	1183113856	1427011840	1820908800	1640435968	2973890048	1345529472	311183808	904097408	874569984	997446656	108022608	890526208	1360337152	2857773824	747689664	3216982016	2726562048	6	6	5	22968	0	27952	Q9Y294	Q9Y294	Histone chaperone ASF1A	ASF1A
2167833600	1970124416	2585178624	2164219904	2052345472	2363503616	2239540480	1757383680	2702232320	1900475008	2150229504	1322054784	2532218368	2461714432	2619371008	2583940608	1655570176	1866168064	2017244032	1871111552	3580159488	2476655616	2280744448	2431099136	1043061952	1090888448	1112019584	1265050368	862813312	1018349376	874368704	1651008768	1238064128	1978094464	153266704	2077955968	6	5	5	22433	0	22648	Q9NVP2;K7ES22;K7ELW9;K7EIL9	Q9NVP2;K7ES22	Histone chaperone ASF1B	ASF1B
781509824	928875456	936927040	917393664	723583040	813786944	520919744	816982912	654771008	716059840	673499968	817169536	654653248	81937480	667882944	835863168	593918016	743000896	698313856	781094848	667517888	667608512	789915200	579531712	960155584	1021737280	915433024	869230336	781083584	876722432	703811840	939142080	821428224	978266816	871009280	972306240	16	16	16	68722	0	16069	Q9UBL3;F5H8F7;Q9UBL3-3;Q9UBL3-2;H0YBF6;H0YAQ0;E5RHM1;E5RFH5	Q9UBL3;F5H8F7;Q9UBL3-3;Q9UBL3-2	Set1/Ash2 histone methyltransferase complex subunit ASH2	ASH2L
897665856	774444608	1074111616	778945536	95252256	837811008	747111808	889802112	975203008	751001920	891049024	912524864	912501504	828453312	805385920	927278400	1022014464	1281881216	959736960	959064000	961612032	954799488	909804992	575493376	511293248	581249792	465304032	666711232	742543488	442550176	690692800	824342784	561009408	570115136	791612096	761117376	15	15	11	51657	0	75474	P04424;P04424-2;P04424-3;F8W943	P04424;P04424-2;P04424-3	Argininosuccinate lyase	ASL
2455476480	2058458496	2128553728	2419621888	2212540928	2444724224	1742115584	2123944064	1904013824	1782059392	1495357056	1594864000	1551258368	2038977024	2118554624	2278219520	2277624832	2329127680	2287703296	2116467584	177658352	165925184	1432342144	1630090496	141908208	165144384	161254704	190979920	138009232	103732800	66736084	158349136	138063072	160438544	149806144	105838624	20	20	20	68856	0	32331	O95671;O95671-2;O95671-3	O95671;O95671-2;O95671-3	N-acetylserotonin O-methyltransferase-like protein	ASMTL
2456712960	2073404160	2587097600	2497986048	2454378240	2323684096	2380353536	2205956608	2514083840	2669206272	2471129600	259032544	2330029312	3230460160	2474324480	2799654400	2609512960	2931725312	2608907776	2674898688	2904782848	1836780288	1428305280	3443793408	2287926272	1245232512	2022914176	2054736000	905916992	1742278016	1751752448	1447644288	186532432	1829813504	922297408	1788368256	10	10	10	38792	0	16403	O43681;A0A087WXS7;K7ERW9	O43681;A0A087WXS7	ATPase ASNA1	ASNA1
3602158592	4879812608	4921661952	782546688	1109985152	124664256	145610032	1131571328	1286233856	1235394816	1252950528	1283610240	3643963392	5267382784	4017918976	4074442240	1004251584	1087329792	1163755648	1166985216	1058683712	1016187136	1205741824	965209408	2977232640	3383445248	2528400384	2806061824	3036899328	3198330880	3136101376	3496797952	3497267200	3860950528	4239648256	3499086336	27	27	27	64369	0	28375	P08243;P08243-2;P08243-3;F8WEJ5;C9J057;C9JT45;C9JM09;C9JLN6	P08243;P08243-2;P08243-3;F8WEJ5	Asparagine synthetase [glutamine-hydrolyzing]	ASNS
677860480	658640448	531386592	653075264	500062816	611380672	428151168	440378080	412989536	412892960	474098144	402729184	502099936	65574032	623359680	666438848	57965088	549470464	570003904	560618432	396866208	522342624	380981600	414822848	534533344	350151040	418824096	298743744	344307936	95899768	94154784	273002272	676866048	69437808	6010346	74184664	3	3	3	1125	14011	30175	L0R819;U3KQP6;U3KQ49;U3KQP1	L0R819		ASNSD1
13648051	11011096	13726455	0	29913468	24031036	40297528	23190178	28114912	34389480	4242141	38897996	1403527	13700664	19120964	13081694	0	28741060	0	0	0	28280048	25658088	103797144	11393517	10515045	17762024	21600744	20745074	23920088	23263372	28750700	32245128	34516268	35213648	39299448	1	1	1	72079	0	10654	Q9NWL6;C9J6C1;C9IYZ1	Q9NWL6;C9J6C1;C9IYZ1	Asparagine synthetase domain-containing protein 1	ASNSD1
0	0	0	0	0	0	0	0	0	0	0	0	0	0	0	0	0	0	0	0	0	0	0	0	0	2098168	7394915	8761769	16726661	0	0	346938	0	0	0	0	3	3	2	85862	15731	6178	Q12797;Q12797-10;E5RHJ2;E5RHK2;A0A087WW51;A0A0A0MSK8;E5RG56;Q12797-6;Q12797-2	Q12797;Q12797-10	Aspartyl/asparaginyl beta-hydroxylase	ASPH
28603646	30729068	247627952	319006624	320297376	293962432	434971168	297658368	268035376	28066594	281872352	271250976	258447312	183926544	205953440	186955856	172502800	175026960	205743312	118602368	138548624	209057408	173700656	179990240	19225768	22552264	25807686	25424814	22096640	21525752	25823776	16688432	19748808	14741618	61516048	30153066	24	24	24	4098	0	27896	Q8IZT6;Q8IZT6-2;Q5VYL4;A0A087WV76	Q8IZT6;Q8IZT6-2;Q5VYL4	Abnormal spindle-like microcephaly-associated protein	ASPM
256538224	297880000	316822496	29448072	372859936	361479520	362483328	254877232	254295200	401047200	300892288	35448592	228428000	215392640	286777856	243451968	372364032	454274848	336443680	240525808	217237264	229545040	274947808	268885152	34039904	3620825	2340833	400317056	433298624	457973408	390796768	242774928	201618000	110220424	283158720	83853664	11	11	11	60182	0	42151	Q9BZE9;Q9BZE9-2;Q9BZE9-3;Q9BZE9-4;J3QL04;J3QR12;J3QR50;J3QRW3;J3KRG1;J3KRY8;J3KRF7	Q9BZE9;Q9BZE9-2;Q9BZE9-3;Q9BZE9-4;J3QL04;J3QR12	Tether containing UBX domain for GLUT4	ASPSCR1
436237568	146204080	299545920	155015200	211361728	161125248	170361872	175055712	159095840	412754784	564243520	491750176	381664224	309198592	36185892	405669984	191657664	193966960	215166480	178888624	84045200	385212384	178400656	214173760	548811520	636427584	650704128	474021600	537271296	580079680	628021312	572168064	630149952	890072064	83805616	717001344	8	8	8	32054	0	21666	Q7L266;Q7L266-2;A0A087WUG3;E9PJK6;A0A087WZI5	Q7L266;Q7L266-2	Isoaspartyl peptidase/L-asparaginase;Isoaspartyl peptidase/L-asparaginase alpha chain;Isoaspartyl peptidase/L-asparaginase beta chain	ASRGL1
922773888	880416192	1210616704	1262158976	597974528	924260288	896052480	1224446848	1001171584	562771264	505598624	1040872064	724883648	755824448	90588856	1085690240	136889408	1752158848	2378803200	244458864	644680896	1028166976	1500753280	919756928	310993216	131987120	261964048	281087808	165637248	154833776	279520736	95072888	12182934	76700576	266331488	39190864	13	13	13	4653	0	49728	P00966;Q5T6L5;Q5T6L6	P00966;Q5T6L5;Q5T6L6	Argininosuccinate synthase	ASS1
14585863	11539965	1745055	14452084	21725960	17252852	20363494	13058201	20168768	17693988	14129484	13628586	14284185	16891740	14225476	19614816	14982455	16220622	16821176	11502487	28378672	22498278	965245	14469549	0	0	0	0	0	0	0	0	0	0	0	0	2	2	2	7992	43491	37606	D6RG30;Q2TB18;Q2TB18-2	D6RG30;Q2TB18;Q2TB18-2	Protein asteroid homolog 1	ASTE1
361941216	298891520	815062336	346008352	362156576	366547040	34457416	459379648	353288064	520584384	477831200	52019824	379109408	357939584	310920672	143070528	3583991	398908672	289996864	537411840	303491360	533761856	366361312	614816128	928129216	1041882624	849980224	1203357568	995657856	952991872	793718336	1032791808	806520000	783288768	923292992	781241024	22	22	3	80224	0	30955	Q9NVM9;H0YH12;F5H457;F5H5W1;H0YIA9	Q9NVM9;H0YH12	Protein asunder homolog	ASUN
25115564	30052688	0	19941944	31440128	10256015	16817844	14448533	56914708	22602788	10438456	44546124	12315065	22853224	17755444	0	4888984	19659760	9560196	10126106	0	0	0	0	36399624	0	33605648	38992356	0	38883616	38705912	26749892	27118722	27933792	23367740	36983296	20	1	1	68494	1	-2	Q9NVM9-2;F8VRX9	Q9NVM9-2	Protein asunder homolog	ASUN
0	0	0	4033142	0	0	0	1832006	2945789	0	1359246	0	4093832	0	0	0	0	0	2093429	318266	0	0	0	51908864	0	0	0	4810576	0	5442527	2360492	955249	1397949	0	1682215	44827240	9	9	9	16545	0	34541	Q8IXJ9;Q76L82;Q8IXJ9-2;A0A087WWN0;H0YJC9;Q5JWS8;Q498B9	Q8IXJ9;Q76L82;Q8IXJ9-2	Putative Polycomb group protein ASXL1	ASXL1;ASXH1
23627280	30007380	23775004	26424336	26043840	1735354	37340440	2785816	27688752	24329908	28395740	22801136	29051544	30754686	27942536	28385884	23255664	1616285	25938914	22928464	46601504	24031758	0	31918632	39391120	21697224	230406	39649692	49928432	39459352	3935994	35893448	52305684	45567172	52893952	39906288	3	3	3	15382	99094	31979	Q76L83;E7EWD6;Q76L83-2	Q76L83;E7EWD6;Q76L83-2	Putative Polycomb group protein ASXL2	ASXL2
31192248	15424134	513767232	144540608	526333568	151150992	23028280	97522816	246676176	40321020	398004192	507971072	13664301	304482336	15030529	264465328	73023816	37148744	230603248	196533056	412708704	213697136	33201584	255524176	264234080	300449472	204979440	340844736	366377952	296941216	370355232	341858880	334599840	384524416	407173248	425318400	9	9	9	40744	0	37054	Q8NBU5;Q8NBU5-2	Q8NBU5;Q8NBU5-2	ATPase family AAA domain-containing protein 1	ATAD1
41404316	329952736	646998592	477880896	426847072	334973472	389907712	203805888	23356782	250238880	248592768	257670496	467172096	348766080	522437120	558490880	260768864	397147552	309105504	250673232	334167200	290240064	283818720	296800800	131623560	135320064	142865232	168833888	137544656	171207312	159176544	116498328	165789760	208324720	213354448	236175760	34	34	31	15855	0	18048	Q6PL18;A0A0B4J211;Q6PL18-2	Q6PL18;A0A0B4J211	ATPase family AAA domain-containing protein 2	ATAD2
96838400	55880712	98392448	66778708	102519160	102146080	97811640	61712208	92234912	87684400	45022444	83092776	119807320	96420808	78534128	79851392	96095376	36539488	63233552	65676824	110310040	49828072	136996736	39196340	48078332	126812736	107770592	140175424	165264944	157616192	14567122	117958232	152387632	185826000	155592064	116369072	16	13	13	16491	0	20443	Q9ULI0;Q9ULI0-2;H7BYF1;C9JG15	Q9ULI0;Q9ULI0-2	ATPase family AAA domain-containing protein 2B	ATAD2B
650354560	7008160768	7395138560	7004860928	7516073472	6816741888	7313309184	5825447424	7029616640	6782770176	6718794752	6772137984	7160973824	728602112	7392485888	7948702720	5842161664	7392596992	7112410112	6964161536	8647854080	7487385600	8161763328	9428283392	7607714304	849792960	6863645184	8497293312	7473596416	7434783744	9039972352	8500200448	8879046656	8058932736	8942064640	8930786304	29	29	10	66217	0	32331	Q9NVI7-2;Q9NVI7;H0Y2W2;Q9NVI7-3;Q5SV16	Q9NVI7-2;Q9NVI7;H0Y2W2;Q9NVI7-3	ATPase family AAA domain-containing protein 3A	ATAD3A
79462840	86646848	121844912	13342965	130534816	92124688	47929704	58885212	83649160	48490040	59627088	55083136	52912984	87555808	68601096	98043400	34666448	77149096	104166880	99102624	92539848	55709420	50014164	86248368	93632072	92131160	98694832	122372080	99855672	83169824	102951280	133966960	42022944	44459240	59817908	40623732	23	7	3	72572	0	37122	Q5T9A4;Q5T9A4-3;Q5T9A4-2	Q5T9A4;Q5T9A4-3	ATPase family AAA domain-containing protein 3B	ATAD3B
0	21402896	0	0	0	0	0	0	0	0	0	0	0	0	0	0	0	0	0	0	0	0	18142128	4627689	0	34026944	0	0	0	27671312	0	0	0	21935752	21869124	27444906	13	1	1	46379	1	-2	Q5T2N8;J3QSF3	Q5T2N8	ATPase family AAA domain-containing protein 3C	ATAD3C
69962072	47883724	30652692	50843384	53526268	54473176	63819988	66864700	72902816	52583736	3872854	50704144	66766372	30479034	21136132	19876716	64150920	55317160	52389488	58612848	51299516	59850684	71694992	65013864	19974540	856161	12881953	20007636	14011662	17866386	71353024	14098798	50700324	56656584	30495954	62448656	14	14	14	20757	0	16732	Q96QE3;A0A075B754;Q96QE3-2	Q96QE3;A0A075B754;Q96QE3-2	ATPase family AAA domain-containing protein 5	ATAD5
852696512	974992896	88272240	1146101376	1013670720	1062331904	1053978432	1070294016	773240576	868259904	737616128	850078144	884362624	849503104	916639936	937366208	1188516480	992491008	901244544	853066944	816011712	851229760	526383936	487618560	256037648	313032640	357916896	339341728	289437056	286286400	284789216	256516000	394407776	194681888	44508744	396007552	12	12	12	4681	0	29424	Q5SQI0;Q5SQI0-5;Q5SQI0-4;Q5SQI0-3;Q5SQI0-7;Q5SQI0-6;Q5SQI0-2	Q5SQI0;Q5SQI0-5;Q5SQI0-4;Q5SQI0-3;Q5SQI0-7;Q5SQI0-6;Q5SQI0-2	Alpha-tubulin N-acetyltransferase 1	ATAT1
279030848	232946640	80108312	67400576	128189256	0	39630444	114711640	29206822	29915876	101981376	69488928	90904688	42964744	106806336	9078729	72104936	0	93661696	610148	0	84616584	41656948	21610488	72061448	40142356	18152024	94054336	119934568	129667920	52957180	10531452	68491504	64170804	111774032	114341000	4	4	4	47834	0	22863	B4E107;F5GXE4;O95260-2;O95260;B4DK25;H0Y5C2	B4E107;F5GXE4;O95260-2;O95260;B4DK25;H0Y5C2	Arginyl-tRNA--protein transferase 1	ATE1
0	0	49129488	0	56257420	0	0	28398424	23837088	23868898	0	0	20091708	0	0	0	80215544	0	0	28342140	31515766	35599136	46330464	0	0	16158193	42426596	131519976	136380848	118842984	220517648	163659392	0	13646425	21681932	112774064	4	2	2	29232	0	14225	P18846;P18846-2;F8VS03;F8VYN3	P18846;P18846-2	Cyclic AMP-dependent transcription factor ATF-1	ATF1
111335056	0	52132196	0	84372816	85003328	43676680	38794320	0	0	0	1617174	123805448	135528048	125857712	96827504	92173528	39840812	39871852	97442688	14002497	11017074	41733120	78410248	64708404	94338336	0	30149436	60362344	66166708	62634716	32512884	29442906	42607868	39524816	29330052	4	3	3	54537	0	30992	P15336;H7C2N6;B8ZZU6;E9PBF9;P15336-5;E9PEK8;P15336-3;P15336-7;P15336-4;C9JCI8;F5H629;P15336-2	P15336;H7C2N6;B8ZZU6;E9PBF9;P15336-5;E9PEK8;P15336-3;P15336-7;P15336-4	Cyclic AMP-dependent transcription factor ATF-2	ATF2
0	4514904	0	0	0	4776047	7608692	0	8133879	0	0	0	0	0	4983039	6466513	0	0	0	8507698	10338449	0	0	11584544	0	0	0	0	0	0	0	0	0	0	0	0	1	1	1	30674	33382	21828	Q9Y2D1;M0R0D5;M0R040;M0QZD2	Q9Y2D1;M0R0D5;M0R040;M0QZD2	Cyclic AMP-dependent transcription factor ATF-5	ATF5
136685872	84285776	113971464	132327624	37343444	209155616	400139520	164173776	20658792	210170048	259310384	269867424	105239136	149206144	100466216	10576871	170938928	357662272	222910720	188589520	311834752	341831136	260625344	15477262	53451316	101292384	37732384	113639328	150504240	129369352	134621088	209884944	81568048	106437504	126708432	141078864	8	8	8	76708	0	11169	Q99941;Q99941-2	Q99941;Q99941-2	Cyclic AMP-dependent transcription factor ATF-6 beta;Processed cyclic AMP-dependent transcription factor ATF-6 beta	ATF6B
9327663	9075658	0	1251769	12320788	1035949	15352926	31072446	38368268	40859756	54444408	56821432	43994656	4814708	10719136	10843083	6078443	54175936	58495056	66589952	1910922	65285884	97184552	24591016	0	10763498	0	50387752	26742632	44409188	50387624	49271040	14800773	2459158	6094183	77685576	5	5	4	49649	0	2555	P17544-2;K7ELQ4;P17544-6;P17544;P17544-4;P17544-3;K7ESA4;P17544-5;F8VWG7;K7EKZ7	P17544-2;K7ELQ4;P17544-6;P17544;P17544-4;P17544-3;K7ESA4	Cyclic AMP-dependent transcription factor ATF-7	ATF7
128574616	104607432	11613275	156614048	173506928	191243648	315742272	20914706	184171392	298418112	248643808	364787584	155503616	176125088	168680160	149703600	300520224	286563712	251642384	253284272	162057728	196132000	234265008	197644032	148134336	153459984	133299016	132096664	148475776	161256640	167513472	135449216	121117544	129983152	8985098	100968808	12	12	12	13639	0	13737	Q6VMQ6;Q6VMQ6-5;Q6VMQ6-4;Q6VMQ6-2;A8MV73;F5H592;F5H3C4;F5GZ98;F5H6X8;F5H221;F8WE35;F5H8I0;F5H2W9;F5H2H9;F5GZ10;F5H502;F5H1K9;F5GYR7	Q6VMQ6;Q6VMQ6-5;Q6VMQ6-4;Q6VMQ6-2	Activating transcription factor 7-interacting protein 1	ATF7IP
52085048	0	0	0	0	0	0	58760652	78673624	31839252	26996064	0	46301404	0	0	0	54069528	29843244	0	0	0	0	26645834	0	0	0	184267808	86648168	68946328	88913544	200512816	0	103120640	169047648	17175088	69578320	3	3	3	25002	0	96169	Q9BSB4;H3BMZ4;F8VVA0;F8VQD9	Q9BSB4	Autophagy-related protein 101	ATG101
126767600	0	185423280	52977624	0	230361600	0	0	0	0	0	0	0	2863445	0	0	0	0	13347936	0	204923360	0	0	96463472	313371552	185910368	555940608	330250752	278807616	365599008	389515968	239864736	186717600	387391968	442130112	360694080	2	2	2	15113	1	-2	O94817	O94817	Ubiquitin-like protein ATG12	ATG12
38051700	20049820	35050112	9702257	47212400	6412739	66715896	31992986	37857836	45029148	18876104	31376916	27366316	26526956	9100346	15863301	30657424	27697796	9352972	58088580	9898175	2029617	29183680	32486436	27860928	17640764	2883863	0	17968108	24867008	3811353	33267564	52991936	3280467	0	23356424	3	3	3	56571	0	1649	O75143;O75143-3;O75143-2;O75143-5;J3KRU6;E9PPR2;J9JIF6;J3QLH7;J3QR16;J3KST9;J3QR83;J3QRL1;H0YEM7;O75143-4	O75143;O75143-3;O75143-2;O75143-5;J3KRU6;E9PPR2;J9JIF6	Autophagy-related protein 13	ATG13
672364	26869526	85	2538508	0	14498645	38974744	16044776	19794104	0	92730528	4556793	15220916	10156156	0	4164505	1460628	0	0	28697400	15457699	0	19237756	22370386	42803112	47461096	22655208	27176604	35635136	30246052	38378920	3803691	43493856	24636886	55495096	33653384	7	7	7	68264	44124	41671	Q676U5;Q676U5-2;E7EVC7;Q676U5-5;Q676U5-4;Q676U5-3;C9JAY7;C9J1B2;C9JK97;F8WAF9;C9J8C6	Q676U5;Q676U5-2;E7EVC7;Q676U5-5;Q676U5-4;Q676U5-3	Autophagy-related protein 16-1	ATG16L1
143881616	125932000	173858528	116409560	226905808	186925824	21033146	205909136	205753744	146485792	175092400	18632956	194685824	211418128	154737904	196599968	21313220	285399232	225393904	118432016	30055494	249633760	204329168	232478736	82350008	88310848	85359608	94424448	91900872	92225232	13348986	119437160	121264624	123427520	11595796	144568704	20	20	19	21286	0	13296	Q2TAZ0;Q2TAZ0-3;H7C3T2;Q2TAZ0-4	Q2TAZ0;Q2TAZ0-3;H7C3T2	Autophagy-related protein 2 homolog A	ATG2A
9720706	8595435	17619834	1528189	8660481	13171379	4141754	6673607	10486653	6857337	10619797	20942002	1041734	24386208	12309604	18501512	7888755	8474171	8605175	758373	12879349	4746048	29286574	12785461	1411458	32740848	19127876	23799672	13513026	2451772	22602092	15919	10429328	24802052	21948592	1764587	12	11	11	23276	0	11289	Q96BY7	Q96BY7	Autophagy-related protein 2 homolog B	ATG2B
1610099072	139107040	119863088	111305712	824578432	1166419712	1439160064	879129152	1053525632	918413824	1225007616	1093260288	1244829056	1099843328	972127488	1088972032	117016192	997386176	1247298432	1070529664	1091298688	1052281024	757800768	1191260800	1227623168	1485468800	1490469888	1052143616	1123953920	1384196992	1265028224	1372827008	883967168	985412032	914051584	853472384	7	7	7	35864	0	62508	Q9NT62;Q9NT62-2;F8WDI0;C9JNW8	Q9NT62;Q9NT62-2	Ubiquitin-like-conjugating enzyme ATG3	ATG3
37182512	4039954	525852640	76447152	78227144	62428232	5431723	55601172	56296676	57750232	42613576	49245904	45539076	86018408	76922112	76134504	65591756	56774420	102741880	8807828	45846728	12671804	0	44392176	45546256	4579593	88328024	87015984	90618200	6417184	83705976	104686232	58676264	647151	93924272	88754176	3	3	3	45377	0	32256	Q8WYN0;A0A0A0MT61;G5E979;H7BYM2;Q8WYN0-3;Q8WYN0-2;Q8WYN0-5	Q8WYN0;A0A0A0MT61;G5E979;H7BYM2;Q8WYN0-3;Q8WYN0-2;Q8WYN0-5	Cysteine protease ATG4A	ATG4A
1067177792	945061952	1310217344	1105684736	1052855232	101116800	1024306624	877296960	135980848	1201478528	1037115072	1124681600	1314340736	1195213312	1159251456	1301902720	1128734464	1339286912	1210851200	933590976	1483611008	1330136448	1060969920	887267328	993441152	10124991	10288956	1135757056	1066782912	1057230016	1107814912	970084160	1078607104	1036015680	1042762624	1109701760	8	8	8	44294	0	18788	Q9Y4P1;Q9Y4P1-6;Q9Y4P1-2;C9JIK8;C9JQ72;Q9Y4P1-3;Q9Y4P1-4;C9J3C0;H0Y2Y0;F2Z2K8;C9JVD5;C9J1C1;H7C2A6	Q9Y4P1;Q9Y4P1-6;Q9Y4P1-2;C9JIK8;C9JQ72;Q9Y4P1-3;Q9Y4P1-4;C9J3C0	Cysteine protease ATG4B	ATG4B
5826453	128845784	82210744	79413088	50375380	57250136	70291848	78337952	20331398	37197152	55279372	78684648	60843664	65769776	65712296	101373448	88327112	78820088	72887440	90622576	80852176	5148983	64918980	54035668	166015968	143925360	176591056	47572104	119797448	118299744	146109984	57483840	29970588	135407536	58630056	51086968	7	7	7	52497	15964	67456	Q96DT6;H7BZW5;C9JC51;A6NGQ4	Q96DT6	Cysteine protease ATG4C	ATG4C
220161552	164027872	201616960	223367056	220267472	270985696	166833904	175751440	308164608	24639836	264248240	250019552	20818428	25100026	109675056	22715006	147721584	287325920	156172928	195619360	243596944	209151632	251721952	197988864	144281312	172280512	103336872	195601488	285457056	113391072	411359072	117687768	191095376	245595872	228925936	316930368	8	8	8	32447	0	12029	Q9H1Y0;Q9H1Y0-2;L7UQJ2	Q9H1Y0;Q9H1Y0-2;L7UQJ2	Autophagy protein 5	ATG5
657800384	788091200	501152096	620025664	585482944	594868096	579261248	567557888	49089348	577511488	48920136	57286896	451564544	583611904	349690688	450468800	616155328	432270240	666198976	661843904	508064736	548284992	376542016	39665704	475012384	55233096	52850672	563445376	41711788	398870592	460517440	482624640	400206752	488869568	523833312	487290240	16	16	16	77959	0	50504	O95352;O95352-3;O95352-2;C9JFF4;C9J415;H7C2R3;H7BZ92;C9JE55;H7C2J8;C9JGL2;F8WDY9;C9JNU2;C9JKA3;H7C059;H7C369	O95352;O95352-3;O95352-2	Ubiquitin-like modifier-activating enzyme ATG7	ATG7
26592528	1169771	18516564	19633694	0	43717596	45213356	10990319	19942632	13816949	27835532	79958472	38695492	52702000	21303316	29430952	27752720	31155292	243078	53172516	42889364	19413480	49497496	45681924	121374048	108347536	96682152	91995496	105839992	75559056	108009400	106178832	81401000	85716744	124774272	79422928	7	7	7	94446	0	12851	Q7Z3C6;Q7Z3C6-2;H7C152;H7C1G6;Q7Z3C6-3;C9JD65	Q7Z3C6;Q7Z3C6-2;H7C152	Autophagy-related protein 9A	ATG9A
0	0	0	0	0	0	10841213	0	0	12484588	0	10757732	11288492	9221709	8776866	1459764	0	12323008	147584	0	0	0	11368964	0	0	0	0	0	0	0	0	0	0	0	0	0	2	1	1	53803	44346	42754	B8ZZ60	B8ZZ60		ATHL1
16433003	21963728	50954576	22853604	26133954	22452836	3254015	69270936	50487460	45340304	91617552	456195	54773064	68549920	18817548	60919520	57676956	49470256	101612480	48554572	5683586	64083964	85767096	38532944	34243572	30797584	32013600	39550264	29233800	26368224	43066552	33056344	23014072	0	37710072	0	4	4	3	80654	0	10856	Q32M88;E7EMA9;H0YCL6;Q32M88-2	Q32M88;E7EMA9;H0YCL6;Q32M88-2	Acid trehalase-like protein 1	ATHL1
1807385728	1816423936	1702980096	1902604032	1927973248	19819912	1855101440	1924594304	1825478016	217711824	2040277120	2090769920	1740165632	1781106816	2107003648	1793675904	2261804288	2554231296	2159603456	2262588160	1827912704	2198672640	2090757376	182353856	2540980992	28801260	2606389760	2715021056	2652614912	2379161344	2834509056	2919819520	266766688	2451036672	2652556288	2596701952	37	37	37	64615	0	32331	P31939;P31939-2;H7C1S2;C9JLK0;F8WEF0	P31939;P31939-2	Bifunctional purine biosynthesis protein PURH;Phosphoribosylaminoimidazolecarboxamide formyltransferase;IMP cyclohydrolase	ATIC
71598800	82021072	84391920	708796	14244792	105476720	112987136	70802688	102105160	95691688	114593064	119021856	64146632	6849025	86270744	82501064	110440696	71077648	84507200	77892784	103501440	103912104	66369232	66140192	30883556	0	0	0	0	0	0	0	0	37753560	0	39719140	9	8	8	63543	0	22022	Q8WXF7;Q8WXF7-2;G3V5T4;H0YJ65;G3V4Y8	Q8WXF7;Q8WXF7-2	Atlastin-1	ATL1
211484656	316604480	202860544	260256928	248467648	369967264	505753216	266356816	357112992	444485	491342816	324465184	214870592	199228288	234656256	19084584	356800064	444822656	380287360	340800256	361961984	410086208	449848352	527238656	219696128	184926048	132897272	224524720	284872352	415276160	400641696	384051104	283458944	432135040	470896960	4982102	12	12	11	66228	0	44826	Q8NHH9;Q8NHH9-5;Q8NHH9-3;Q8NHH9-4;Q8NHH9-2;B5MCN0;C9JQQ5;H7C3A2;C9JC25	Q8NHH9;Q8NHH9-5;Q8NHH9-3;Q8NHH9-4;Q8NHH9-2;B5MCN0	Atlastin-2	ATL2
716440448	830591744	846625920	831536384	762474560	776723712	957001856	796359424	965870080	1043106816	847306176	848635840	971596160	868912192	1107948672	1086818432	929415680	862976064	936539264	1065680832	958784192	893488768	1004554432	84202136	66596544	602018304	742952064	569331200	731817920	644544064	521957344	699752832	689549120	625235840	688543616	651208768	15	15	15	60541	0	17353	Q6DD88;F5H6I7;F5GWF8	Q6DD88;F5H6I7	Atlastin-3	ATL3
169859792	150001472	154779424	145856560	148129872	149028384	122363872	132479040	98497144	125460104	108593824	164729520	160918640	175899856	16802124	23906100	146312384	184157232	114757472	13052971	120639776	158497344	184174752	131068512	384584672	375507616	436384224	374276320	334358496	32679584	314121280	344457664	356881952	317016640	356265280	301453824	52	52	52	35068	0	32301	Q13315;E9PIN0;A0A087X0E9;E9PRG7;Q6P7P1;M0QXY8;E9PIQ5;H0YDU7	Q13315	Serine-protein kinase ATM	ATM
2558830080	2951432448	1327972352	3473524736	3068279808	363142080	4058279424	4277355264	2784887040	3653089280	4077107456	4329465856	4717241344	2982204928	3299673088	2667377408	5533047808	491972192	483688640	3875613184	263512688	4040638976	3053713152	2840166656	2822819840	3361361664	4208921088	3439910144	2517746688	2069423488	2508200192	2308416512	3857391360	1551251072	1673745664	2786296320	2	2	2	74016	0	11799	O00244;E5RGN3;E5RIM7	O00244;E5RGN3;E5RIM7	Copper transport protein ATOX1	ATOX1
18903100	19611028	28300136	20533580	57913728	98948936	154100880	28156820	126741056	69197256	55465032	5694541	97441624	97425864	89587040	100632616	20801914	127344960	7021391	93531776	30707842	36439508	42034944	63683936	25833456	2387289	65256360	19366618	2043923	15934202	21580236	23743948	84194136	17944552	2411793	1565576	10	8	8	12975	16305	75243	P98196;E9PEJ6;H0Y547;H0Y8F0	P98196;E9PEJ6;H0Y547;H0Y8F0	Probable phospholipid-transporting ATPase IH;Phospholipid-transporting ATPase	ATP11A
70221888	94251432	138313168	91108528	86333376	88386752	65104480	70564392	84639464	54335488	54310180	78860592	10295652	87737680	102277200	109786608	81122688	53364700	48501148	67674696	72368392	54144936	81998272	73994832	109603296	113517152	174769936	77419520	137906832	72998512	59762744	73410912	51665784	64417744	26365946	81287024	17	17	15	13419	0	22958	Q9Y2G3;H7C4W6;A0A0C4DG94;H0Y8C7;H7C575;H7C4E6	Q9Y2G3;H7C4W6	Probable phospholipid-transporting ATPase IF;Phospholipid-transporting ATPase	ATP11B
4281323	34535296	33655728	27591274	35657324	58379012	26710248	38783112	28180208	30670920	29423160	41260408	31210192	45545576	38288132	25869238	57936476	41015536	37439496	43068024	47523456	39465100	47814956	5817506	38680976	38049156	46625796	69939760	33763080	41000808	45603232	35445516	42055628	47360496	28959116	3444096	12	10	10	12768	0	22574	A0A067XG54;Q8NB49-3;Q8NB49;Q8NB49-2;Q8NB49-4;H7C0E8	A0A067XG54;Q8NB49-3;Q8NB49;Q8NB49-2;Q8NB49-4	Phospholipid-transporting ATPase;Phospholipid-transporting ATPase IG	ATP11C
57725036	49004816	57424144	5266833	18690088	44959620	43357656	109444704	0	83135032	78079784	52627616	1635847	103671552	36606940	6220093	40109688	68937040	42719844	44160452	36887560	47268044	55820008	48480720	54182768	47266608	43803356	3102115	37645056	94525832	54379620	65644688	26291152	71119520	56057884	64435824	8	5	4	11551	0	11485	P54707;P54707-2	P54707;P54707-2	Potassium-transporting ATPase alpha chain 2	ATP12A
1116479360	699145088	1851333376	1045627072	186579184	644798016	322509696	252956928	130952280	486120480	1100780800	499382528	361905920	292111040	277614144	258198320	344902336	545301824	383253824	396096448	372981120	713038592	678693632	478434624	169235104	18474416	1234011520	692416896	15652547	184347776	206365216	175555840	950838272	180261488	186174112	222753312	25	25	25	13295	0	92338	Q9HD20;Q9HD20-2;Q9HD20-3;H7C3H2	Q9HD20;Q9HD20-2	Manganese-transporting ATPase 13A1	ATP13A1
0	0	0	0	0	0	0	0	0	0	0	0	0	0	0	0	0	0	0	0	0	0	0	0	0	75793360	0	93555768	0	0	54189704	146453888	0	0	117047632	0	1	1	1	1888	27097	23836	H7C1U7	H7C1U7		ATP13A3
0	3838282	0	0	0	1399439	0	0	0	0	0	4662001	4398613	1826007	3947866	0	0	3423596	0	0	6400154	0	0	0	47064216	60738632	60768840	63208000	75685792	75222080	45636388	58857876	91652688	80177560	97659848	75760848	11	11	11	13804	0	18304	Q9H7F0;A0A087WYY3;Q9H7F0-2;C9J7Z7	Q9H7F0;A0A087WYY3;Q9H7F0-2	Probable cation-transporting ATPase 13A3	ATP13A3
4008002816	3730529792	4516076544	4262840832	4465924096	4121989120	464556704	4372809216	4786140160	4559398912	4715307520	4571329024	5035302912	5457643520	4804516864	4341204992	5140696064	56262656	5015668224	4984045056	5603913216	5926471168	5540481536	5350771712	7393841152	8385602048	7819437056	7074359296	7516522496	7347042816	6942148096	6976399360	8393138176	8427996160	7793440256	8285788160	37	37	25	11289	0	32331	P05023;P05023-4;P05023-3;P05023-2;Q5TC02;Q5TC01;P20648;Q5TC05	P05023;P05023-4;P05023-3;P05023-2	Sodium/potassium-transporting ATPase subunit alpha-1	ATP1A1
0	0	0	0	0	0	0	0	0	0	0	0	0	0	0	0	0	0	0	0	0	0	0	0	36191252	35143920	0	45488688	0	0	0	0	28906708	0	0	0	13	1	1	11226	0	16224	P50993;B1AKY9;H0Y7C1	P50993;B1AKY9;H0Y7C1	Sodium/potassium-transporting ATPase subunit alpha-2	ATP1A2
30942428	26694868	13152414	0	26533458	32248974	43288916	80338392	38581320	49737608	4199676	877199	2272901	22582096	19029664	5964402	39755672	17754306	9724907	6781466	11875073	47735388	37515536	25657558	517867584	305849248	42554904	393841760	368130208	509792960	389858304	650801472	76188520	685768768	44902840	50392152	28	16	13	11175	0	30221	P13637;P13637-2;P13637-3;M0R116;A0A0A0MT26;M0QXF2;Q13733;E9PRA5	P13637;P13637-2;P13637-3;M0R116;A0A0A0MT26	Sodium/potassium-transporting ATPase subunit alpha-3	ATP1A3
233766224	228994528	256962992	283567776	414907904	308517376	368874752	298624544	30776744	44234628	390844224	523690816	402783328	382730112	345194688	391522080	523985664	660584832	37569520	300139872	389620000	42614104	388458336	36844880	32020228	382141024	335959296	387009664	370415168	291110432	256890896	312753440	412924160	389370688	440548672	404554144	3	3	3	35061	16584	82757	P05026;P05026-2;V9GYR2	P05026;P05026-2	Sodium/potassium-transporting ATPase subunit beta-1	ATP1B1
2924140544	3155796992	3417945856	3498620416	3296367104	3331665920	3207741696	3379660800	3300353024	3198312960	3183434496	356921856	3620022272	3218978560	3408445184	273897152	3294707968	3154918656	3675878144	3285163264	3238212608	3516822528	2835524608	2865193984	4147237632	4692624384	4026654976	4093603328	4125863424	4311978496	4064211712	4262318848	3891959296	4886514176	3814011392	5238753280	15	15	15	31512	0	14203	P54709;C9JA36;P54709-2;C9JXZ1;H7C547;F8WBY4;C9J6S2;H7C4L9	P54709;C9JA36;P54709-2	Sodium/potassium-transporting ATPase subunit beta-3	ATP1B3
33534012	264844752	273554880	295339584	269472448	246699680	218318480	292593568	236677680	215680384	220927936	248835648	34940668	268649280	311497120	31046596	288269280	233808480	262338640	265291856	246730240	221461888	153252224	138502624	100620856	95372880	118889136	103692768	111171312	95339312	90679528	10090561	101387744	90168880	108443632	111932272	18	3	3	11025	0	22856	O14983;O14983-2;O14983-3;H3BVB2	O14983;O14983-2;O14983-3	Sarcoplasmic/endoplasmic reticulum calcium ATPase 1	ATP2A1
5777235456	5488192000	6296485376	6483240448	7746898944	6730781184	7355681792	7483155456	6412180992	7387991552	6801344512	714985856	6251239936	6325801984	7107418112	6402848256	7053947904	7693731328	7216039424	7200297472	7465888256	7617463808	7058345984	6911052288	5553732096	6082225152	6320917504	5958063104	5398531072	5899202048	5891621376	533990656	6011291136	6047096320	6590590464	6390004224	38	38	23	11476	0	32331	P16615;P16615-5;P16615-2;P16615-3;P16615-4;H7C5W9;A0A0C4DH86;J3QSY6	P16615;P16615-5;P16615-2;P16615-3;P16615-4;H7C5W9	Sarcoplasmic/endoplasmic reticulum calcium ATPase 2	ATP2A2
4954028544	4010324736	4811620864	4046473728	3311909120	4099783680	3222434560	4371073536	3940927744	4046693376	3407985920	41813040	5183814656	5570970624	5067558912	5206117376	4601912832	5071105024	4335028736	4534028800	5140853760	5059971584	4497268224	4746833920	2064216192	2183297536	2198448640	2251982848	2015220992	1950657792	2468061440	2390615040	1931000192	203350032	243743776	203663104	30	25	1	11398	0	32331	Q93084;Q93084-3;Q93084-6;Q93084-5;Q93084-4;Q93084-7;A0A0C4DGN3	Q93084;Q93084-3;Q93084-6;Q93084-5;Q93084-4;Q93084-7	Sarcoplasmic/endoplasmic reticulum calcium ATPase 3	ATP2A3
54593372	60909492	52940836	15990811	40394092	86986288	64478648	114098672	3467478	74138664	90948704	140171232	17384186	37128952	16618269	81158392	108695224	54206784	50434084	41762440	2843207	79043376	41964992	6346923	2251657	12583328	10820303	36099108	14138888	12971605	61189192	17747368	105309528	66549016	98583544	31194908	30	1	1	10925	39641	20182	Q93084-2	Q93084-2	Sarcoplasmic/endoplasmic reticulum calcium ATPase 3	ATP2A3
516790688	510899040	454941760	566377472	46507864	591315584	590841920	962707264	652086976	694741568	692774080	720839040	607167360	50318344	429312096	543252096	495132480	538647040	1006767232	473817280	567142720	591922560	635229248	511997824	940435456	917644032	908954816	918408384	10577173	77184000	997027520	1004766144	1009387328	934739264	956930944	88689120	23	23	11	13875	0	25151	P20020;P20020-6;P20020-3;P20020-4;P20020-5;P20020-2;E7ERY9;Q01814;H0Y7S3;Q01814-6;Q01814-8;Q01814-5;Q01814-2;Q01814-4;Q01814-7;Q01814-3;H0YHH6	P20020;P20020-6;P20020-3;P20020-4;P20020-5;P20020-2;E7ERY9	Plasma membrane calcium-transporting ATPase 1;Calcium-transporting ATPase	ATP2B1
4588698	4566649	7970977	0	5888118	0	0	7832272	0	0	1974908	0	0	0	0	0	0	0	0	0	0	0	0	0	339767	3197527	2823276	1937624	0	0	0	0	0	17487	24854860	23216076	9	1	0	1342	98898	3182	Q16720;Q16720-4	Q16720;Q16720-4	Plasma membrane calcium-transporting ATPase 3	ATP2B3
7030982	6955626	12556572	0	7642728	0	0	0	7981268	0	0	0	5727441	1021558	5754664	7212777	0	0	35367832	0	9522662	0	0	15551821	766333	8100118	8156739	10759437	0	7532117	0	0	782679	8565641	9601383	9350133	9	1	1	12276	1	-2	Q16720-8;Q16720-7;Q16720-2;Q16720-6;Q16720-3;Q16720-5	Q16720-8;Q16720-7;Q16720-2;Q16720-6;Q16720-3;Q16720-5	Plasma membrane calcium-transporting ATPase 3	ATP2B3
36347296	40216304	2252481	25806916	27705384	23987938	31152404	39277648	17072832	18345402	14934823	15063703	3861503	33678736	78307408	36021420	41301092	17195144	30917936	18615076	24400380	79865472	27925780	26899096	21124144	17188696	38132844	99095056	41263848	25060642	3478063	21875460	25226420	31142632	29262732	45820412	14	5	5	13792	16586	82824	P23634;P23634-6;P23634-7;P23634-8;P23634-2;P23634-5;P23634-4;P23634-3	P23634;P23634-6;P23634-7;P23634-8;P23634-2;P23634-5;P23634-4;P23634-3	Plasma membrane calcium-transporting ATPase 4	ATP2B4
0	142751	138681168	187936448	154044112	222198256	13180537	28688676	0	21420452	12147027	204806224	177455376	0	0	178087840	17829728	18538928	0	13848748	10966777	232729488	0	13115151	17831208	258123008	0	18192524	1406928	1296445	923045	15198298	1730439	1740916	240321	12663826	4	4	4	10058	15586	58952	P98194;P98194-8;H0Y9V7;B4E2Q0;P98194-2;P98194-4;P98194-3;P98194-5;P98194-9;P98194-6;P98194-7;H0Y8X9;H0Y9S7	P98194;P98194-8;H0Y9V7;B4E2Q0;P98194-2;P98194-4;P98194-3;P98194-5;P98194-9;P98194-6;P98194-7;H0Y8X9;H0Y9S7	Calcium-transporting ATPase type 2C member 1;Calcium-transporting ATPase	ATP2C1
3251242752	3426894848	2806169856	3482197504	3056797184	3242323456	3092119040	3138426112	3465083392	2948759808	326953056	3152113408	3204669440	3127554048	3250657024	3351949568	3475369984	3011945472	3795478784	3908536832	3690321152	3545279744	3951973888	5594068480	3748569088	3728249344	3612003072	3636842496	4189590016	386859264	3695066368	4414800896	3563308800	3322492928	3926390784	3617981440	37	37	37	5975	0	32331	P25705;P25705-2;P25705-3;K7EK77;K7ENJ4;K7ERX7;K7EJP1;K7EQH4;K7ESA0	P25705;P25705-2;P25705-3;K7EK77	ATP synthase subunit alpha, mitochondrial	ATP5A1
0	0	0	0	0	0	0	0	0	0	0	0	0	0	136637440	0	0	77583064	0	116236688	54484640	55161800	74063560	0	108732616	84092360	95469216	0	61032632	0	56849208	69631496	0	41109664	57065120	31147984	17	1	1	3017	1	-2	F8W079	F8W079		ATP5B
0	0	0	0	48984860	68301200	46655340	99504984	0	0	0	21475392	0	0	0	0	51040584	0	0	2721397	98744504	128096736	173730160	136744304	0	0	0	68987224	72172264	105133336	8320251	32295968	114372528	30404592	0	39506184	12	1	1	28392	92072	15846	F8W0P7	F8W0P7		ATP5B
0	0	0	0	18483774	0	0	0	0	0	0	0	0	124306240	0	126789712	0	0	76530128	88079560	0	0	0	0	102255392	62253368	115317616	95533520	87459448	7951709	118155512	103236912	82787464	100670000	110468016	114538952	7	1	1	13907	1	-2	H0YI37	H0YI37		ATP5B
6568677888	6298944512	6634420736	6760547840	6553029120	5908391936	5576434688	5862550528	607334976	6588653568	6081241088	6502303232	7092897280	6409096704	6646096896	709121408	6240549888	6273480704	6299644928	5996126720	7781444096	683536192	8050604544	9397096448	8435092992	7842651136	8317264896	837582208	8384717312	8938449920	8412612608	9103870976	8412791296	9176353792	9089310720	9990546432	31	31	9	56559	0	32331	P06576;H0YH81	P06576;H0YH81	ATP synthase subunit beta, mitochondrial;ATP synthase subunit beta	ATP5B
8680725504	9198078976	9057567744	1067900928	7990086144	8541997568	8359992320	6702216192	7327928320	7751360512	9573334016	8640773120	9740623872	7976744448	9057839104	9248788480	8831099904	7719038464	9164876800	9278705664	7145789440	817126784	1274830080	1073015040	2124816512	229161696	231980608	2398428160	1064151936	1678102528	1412410752	1839994240	241930720	1611942528	2151819776	1453306112	14	14	14	32996	0	16411	P36542;P36542-2	P36542;P36542-2	ATP synthase subunit gamma, mitochondrial	ATP5C1
718233536	966703680	1551658496	1672342784	1326614272	1119092096	799795712	1248512128	1747758208	2214158592	1608675840	2004134912	1260334208	1836369152	2010758272	2489037312	2729959424	272113760	3251082752	2518721792	1992970368	3292907776	3203379456	5666818048	4425604096	3924151296	3976985088	3844073984	4161390592	4040654336	4730832384	3692885248	429685568	4883056128	4330249216	3822137856	5	5	5	1749	0	20273	P30049;A0A087WTL3	P30049	ATP synthase subunit delta, mitochondrial	ATP5D
1040032960	1153919744	7276357120	1148121856	7479331328	6027881984	6332813824	1100306176	5936414208	4447205376	6368900608	1027987264	5998104576	54104732	4386491904	5157682688	9182136320	9019955200	5394585600	7291714048	5387743232	5700965376	5943759872	6483656704	102725104	1111818880	1112663808	1237569280	7826364416	1653926272	8827587584	1197237376	9871688704	1235749120	1259459328	1509501952	11	11	11	28908	0	32331	P24539;Q5QNZ2	P24539;Q5QNZ2	ATP synthase F(0) complex subunit B1, mitochondrial	ATP5F1
1677696512	1231147392	1004641472	1273202560	120131776	1325548672	1339352320	1454580864	1422828800	1521584768	169554992	158481200	1695274112	1574902528	1423158272	172594544	1974720128	1637127808	1791143936	1701730688	1873734016	1891454336	1658968320	1884297088	173708640	1793682048	226672112	202403424	1776636800	1746581760	1701537152	1757819904	22602952	1793996544	173779072	1837526784	12	12	12	18491	0	18192	O75947;O75947-2;F5H608	O75947;O75947-2	ATP synthase subunit d, mitochondrial	ATP5H
1624844672	1801149696	1085571200	1346544896	1547508864	1331044736	2081741568	1561871744	1470975744	1871228672	2243251200	1933058688	2509056256	1571027072	148929952	1523854080	1909245568	1876971520	1755974528	1917010560	158677344	2153759232	2684600832	186702976	2689511168	2997982976	3483133440	2945901056	2430395392	2786502656	2134978944	2873729280	3873156608	2709570048	2874383616	2314480896	5	5	5	79331	0	13816	P56385	P56385	ATP synthase subunit e, mitochondrial	ATP5I
4208088320	4736922112	2916797184	2556959744	2871070208	1922093568	3151234048	3332469760	2625137664	3019038464	3494569216	4368559616	4164945408	3036620544	3045387008	2935071488	2200818176	4123684352	2759807232	1495124736	4286545664	265589136	3483880960	3198060288	2695015680	2521707776	4391633408	4981657600	3293633792	3087857920	4761650176	5117260800	9244167168	6153717760	7029394944	4656848896	4	4	4	12587	0	22506	P18859;A8MUH2;P18859-2	P18859;A8MUH2;P18859-2	ATP synthase-coupling factor 6, mitochondrial	ATP5J
828838272	1223793920	1658574848	873344320	1194003072	1176374656	1064815744	921467392	1288955904	1096686080	955104256	1001659584	918421184	1021038784	882004736	1005451712	672089216	1062802112	1325006976	1056022080	1366739840	587775552	1025512384	509142208	1792447744	1758564096	1660356480	1917414400	1638492928	1587292160	164390672	2075117696	1921501824	1623623040	1980103296	2316509952	12	12	12	84109	0	31489	G3V325;O75127;C9JJT5;P56134-4;P56134-2;P56134;C9JU26;P56134-3	G3V325;O75127	Pentatricopeptide repeat-containing protein 1, mitochondrial	ATP5J2-PTCD1;PTCD1
1844984832	2261324032	1867815424	1916623232	2391621632	2059924608	2836505856	2062770048	2548736000	2799048192	3204065536	3010423296	3191563264	2145612032	2089468800	2475685632	3311624704	2974461440	2990562048	3085263360	2075964928	2234990848	3680529920	3174977792	3126117632	3421873920	2881401344	3482882816	3883177728	4098467072	3258528512	3696328192	3995451136	3625296896	3738636032	364202720	7	7	7	11428	0	11014	O75964;E9PN17	O75964;E9PN17	ATP synthase subunit g, mitochondrial	ATP5L
136624368	1529869184	1313572608	1278373760	1103325440	1385446656	1249335424	1435542912	1443335168	1231794560	1236926976	1277727360	1620569984	1373085568	1427440768	1481743616	1381940352	1302805248	1596726912	1753843968	1306408576	1468271872	21371962	2049227904	2298422784	2244297472	1980735232	2392823040	2255638784	213817696	2239799552	2334538752	2535854080	2267536896	2333301248	1887822464	14	14	14	23277	0	32331	P48047;H7C0C1;H7C086;H7C068	P48047;H7C0C1	ATP synthase subunit O, mitochondrial	ATP5O
316986848	406133536	281922656	362640096	185760272	263156208	103369808	263136000	193947808	212606240	241924528	177257376	155972416	178485536	228985360	20257504	161331472	13398205	134557552	175003472	182776736	275324384	233211120	185063600	25725852	270279008	340544128	308226656	178876688	212973216	203190880	23467712	382238656	219978640	247992560	145188656	5	5	5	24866	16207	73097	Q99766;Q8WXQ4;Q99766-3;Q99766-2	Q99766	ATP synthase subunit s, mitochondrial	ATP5S
194565296	168160224	191814240	214364976	294060000	288800064	314780000	246567616	335677312	333712928	365004928	351597888	162265104	179932368	181715120	158350336	24133064	239119424	199279632	189091536	387380800	305353184	224197728	34023048	172415008	253657072	193516864	209272192	212121840	193380480	214175760	275969152	193115584	129843096	223301856	238820560	3	3	2	29267	15401	55333	Q9NW81;Q9NW81-4;Q9NW81-5;K7ESN5;M0QZP7;M0QZC4;K7EIV4;B4DFT4	Q9NW81;Q9NW81-4;Q9NW81-5	ATP synthase subunit s-like protein	ATP5SL
124885320	257870592	11102381	175840528	102516648	225929616	296794080	228457824	299191392	155088400	131834512	155196000	312570656	491456320	491055744	354464800	505651520	166328080	401487008	318311680	72424792	463849664	249764864	492671040	588552512	427709056	363046112	283832928	51089944	46108112	700699200	675971136	481906944	544944960	415291360	453864256	10	10	10	52025	0	22125	Q15904;A0A0C4DGX8;A6QRJ1;A6NLC6;H7C2Y8	Q15904;A0A0C4DGX8	V-type proton ATPase subunit S1	ATP6AP1
823049408	761233088	686750016	74557616	726058560	858908032	758149376	80840712	947932992	661469120	61364864	693563392	611547072	892793344	713902208	786814592	705372288	904578048	566617856	584540992	615530240	726226048	563470016	59339712	424496768	461603392	479066816	549711744	293649440	450204832	334573440	398583968	571124736	33317328	453965088	169894112	9	9	9	39008	0	31431	O75787;O75787-2;H0Y750;H7C3E1;H7C240	O75787;O75787-2;H0Y750;H7C3E1	Renin receptor	ATP6AP2
56154140	62891568	71319792	44427624	91608352	56807456	108116160	76685232	6880015	769723	92976792	75302056	62506052	84727592	54635824	54772036	86348360	82731656	91073232	93490152	7949794	75894472	110530192	100245592	106917376	119405424	85612344	89994416	138441712	85742584	98557600	130314120	9532192	74628816	108051840	79876648	11	10	10	96412	0	67815	Q93050;Q93050-1;Q93050-3;B7Z641;B7Z2A9;K7EN36;K7EPG4;K7EM24;F5H1T6;K7EQW2;K7ELZ6	Q93050;Q93050-1;Q93050-3;B7Z641;B7Z2A9	V-type proton ATPase 116 kDa subunit a isoform 1;V-type proton ATPase subunit a	ATP6V0A1
238339744	275257344	34647348	326258880	303402784	39428180	368184608	311418336	366002656	676128256	390122176	355116448	180922928	407285920	243475232	277670752	307086688	420621504	233092240	33597192	484515072	520675392	36299032	374129152	182663376	513971456	15458112	588962688	236611280	235775936	580910656	285884928	283388608	715925248	562240896	294835040	16	16	15	98081	0	15726	Q9Y487;Q8TBM3;F5H5F3;F5H847;F5GX48	Q9Y487;Q8TBM3	V-type proton ATPase 116 kDa subunit a isoform 2;V-type proton ATPase subunit a	ATP6V0A2
105927656	990240384	1780045312	173482256	3397656320	1345432960	191572160	1172049664	2462415616	2776378880	2940416256	2400988416	1780655360	188592944	1313509504	1707758976	1176497920	861524672	2203001600	834233856	1101388672	1575556224	1874011136	744535552	1688987648	1926325632	2312944384	2173240576	1711368704	2250109440	2698192384	2544097792	2462083072	1954719104	1414673536	2159849984	1	1	1	11602	7105	1708	H3BNI4	H3BNI4		ATP6V0C
507736992	1017558976	5294292	1228920576	56031112	1367346432	1087137920	1080060416	1313584512	1227023488	1098118656	1934846720	1109105792	156971024	122435216	979805888	1782452352	94954376	1541036800	1294076800	519551776	1057960832	1247038336	726379712	0	858378880	1096204288	1148848640	10004744	1079551744	1573607552	160791696	1868778624	1857381888	122771272	189231664	1	1	1	15736	15873	65287	P27449	P27449	V-type proton ATPase 16 kDa proteolipid subunit	ATP6V0C
705918016	576549760	465964064	713187584	962795648	1079383296	974733056	830939328	1101666816	896774912	849943232	944592320	839263552	79570776	80284376	785929984	929952000	105611584	929448320	91603888	950240448	957571648	953915904	107370952	663380864	663619584	711449280	84411104	945542976	794746624	800138368	749532800	1000729920	805613632	947879296	870495168	7	7	7	40329	0	48706	P61421;F5GYQ1;R4GN72;J3QL14;H3BQJ1;H3BQB4;H3BSG7	P61421;F5GYQ1;R4GN72;J3QL14	V-type proton ATPase subunit d 1	ATP6V0D1
2193443584	2663908864	3345334016	292184992	3259025920	2704930816	2532326656	2462136576	3481879808	2949317632	2448015616	3190285824	2432847616	3053620224	2980136448	3133071872	2487347712	2622848512	2811401216	2671658496	4050956800	2943944448	2681252864	2773315584	4601443840	4320649728	4937972736	4680736256	5217300992	5152311808	5075749376	5014825472	5250716672	5485948416	5809983488	6694456832	26	26	26	68303	0	32331	P38606;P38606-2;C9JVW8;C9JA17	P38606;P38606-2	V-type proton ATPase catalytic subunit A	ATP6V1A
1395175808	1152608128	122957032	1140376576	1312569472	156769968	1511906048	1343768192	1215680000	14078385	1212070144	1428977024	1429772288	1630591488	1519255808	1258584064	1589347200	1394807296	925836480	1425921280	1561992704	1327878400	1391213568	1017583744	1743829248	17320132	1635545216	2025978368	1381013376	1246041216	1826541824	1558083456	1677832448	1568408704	2154875904	1986671232	16	16	16	565	0	11877	P21281;H0YC04;P15313;E5RGH6;C9JL73;H0YAT8;H0YC45;C9JZ02;C9J5E3;C9JNS9	P21281;H0YC04	V-type proton ATPase subunit B, brain isoform	ATP6V1B2
634540864	519840960	545702656	651915200	760372416	780935680	572669504	48870592	69228168	6151679	619673728	67971808	600042880	356464896	472524256	423484128	575347392	55227284	399809024	573150080	613837120	510352640	947903680	609354624	658226880	68053144	674335040	747550976	579618624	618093120	651906880	459903584	867297280	6348761	6189966	616562944	16	16	15	43941	0	40904	P21283;E7EV59	P21283;E7EV59	V-type proton ATPase subunit C 1	ATP6V1C1
527194304	612824768	35416612	637043520	290026176	536565984	3598605	918272512	579216768	583674944	536072192	639539264	411848192	865220480	726936768	663580288	692521536	606125824	556415360	749230592	491112320	640707008	624332224	892876608	79155328	1027145664	480668160	598898304	537241600	777777024	1016234176	813893760	393546496	405377568	841474944	477973824	6	6	6	28262	0	59933	Q9Y5K8;G3V2S6;G3V2V6;H0YJH8;G3V559;H0YJS0;H0YJ55;G3V5S7;G3V341;G3V3T8	Q9Y5K8;G3V2S6;G3V2V6;H0YJH8;G3V559	V-type proton ATPase subunit D	ATP6V1D
804576320	594159360	64169932	540857664	858566336	979646016	1250268928	818985216	1002854976	201470816	998304128	2149808128	1477729152	1313238528	1198673280	1214898688	1417096064	1065605120	1006186240	1330805760	1120929792	85682192	1941765888	2072090624	2477510912	2423514624	1853620864	1954157696	2982707712	2686536448	2617024768	3064944384	3140118528	2937691648	3002051584	2678996480	12	12	12	26145	0	38535	P36543;P36543-3;P36543-2;C9J8H1;Q96A05	P36543;P36543-3;P36543-2;C9J8H1	V-type proton ATPase subunit E 1	ATP6V1E1
1535423104	1460756992	890845120	95741296	1495977472	1456414464	2225738496	1621965056	1093360384	1450505984	1877984640	2289073920	1460818176	2129123712	1286555136	1541590016	2518818048	2515831552	2020194048	796499840	2246135296	2963035648	3049077760	2446713088	1018857920	848311360	1188540288	92547776	1171917952	1356494720	1559995136	1570634624	1650765184	1505124224	1538350592	1482949504	5	5	5	1337	0	68922	Q16864;Q16864-2	Q16864;Q16864-2	V-type proton ATPase subunit F	ATP6V1F
1161793280	1155852032	871547520	1159528320	1039538752	1165150848	1292736640	1276604672	1299838848	1517209856	1650526592	1593060992	2329010944	1767559808	1608030720	1639931136	2217508096	1728525056	1411788416	1133933696	1445886208	1858178816	1996267264	1609842688	221095952	1640447488	1550552960	1938237568	2350025984	2154757632	2137677312	2115362304	177704512	2274519808	2402584064	2520574976	4	4	4	13757	0	15746	O75348;O95670;F2Z307;O95670-2	O75348	V-type proton ATPase subunit G 1	ATP6V1G1
522223392	689582592	710146048	68991472	567268608	623947520	534060896	527527712	483533920	451477728	521055136	550494592	567501376	518481472	517950176	544505408	455050112	503742464	646068544	593789696	371118720	408778560	333254816	360875840	588372736	703261888	613188608	825676352	534002208	480743392	490372928	486856128	565377728	499914880	543827776	57712800	10	10	10	55882	0	15912	Q9UI12;G3V126;Q9UI12-2	Q9UI12;G3V126;Q9UI12-2	V-type proton ATPase subunit H	ATP6V1H
14537735	12378233	0	0	3168318	8920932	6426067	2623463	0	3782074	2971195	9592012	8686872	6607643	9549048	14762213	4282685	12882869	7144235	7249463	0	0	0	2786628	1644888	428409	884487	3872455	12598603	14487365	3490714	3468124	2619293	5587758	2310515	2914255	4	4	3	16337	15477	56605	Q04656;Q04656-5;Q04656-2;Q04656-3;Q04656-4	Q04656;Q04656-5;Q04656-2;Q04656-3;Q04656-4	Copper-transporting ATPase 1	ATP7A
67656600	74799240	46353848	39146084	46170488	4022654	48184744	57654692	49092532	48526184	40381528	40575036	49774516	47685988	46413200	49644252	51278024	68514304	4396031	29478632	42124960	48047248	10605981	234829648	17129916	3637813	13044783	2838731	3427765	11078624	32544714	22751198	0	0	0	0	8	8	8	13137	0	99197	Q9Y2Q0;Q9Y2Q0-3;Q9Y2Q0-2;H0YAA1	Q9Y2Q0;Q9Y2Q0-3;Q9Y2Q0-2	Phospholipid-transporting ATPase IA	ATP8A1
739768	5219731	0	6543672	27314616	0	0	2116727	8505981	1977505	11905048	0	2762823	0	353613	4107905	8129942	0	0	5588646	8474026	13923344	0	12459506	15170818	16304124	5293306	18850492	8938666	11555229	6458985	2347804	7516227	364841	9086465	13124813	5	5	4	1293	37125	20735	O43861;O43861-2;F6XUP2	O43861;O43861-2	Probable phospholipid-transporting ATPase IIB	ATP9B
158105744	110908360	150134336	37716008	8128877	86461360	145358640	114922120	102092048	75294184	109393504	147026448	205833232	85082848	135182416	160922560	70881440	169903456	147700512	124243560	128772920	168473200	206972816	158745280	250702368	241659440	147968000	308496480	193004480	266382928	206185520	127913584	242849360	196492128	240120224	314718688	9	9	2	36436	0	20548	Q5TC12;I3L448;A8MRA7;H0YEW4;H0YD21;Q5TC12-2;H0YDD6;H0YCA6	Q5TC12;I3L448;A8MRA7;H0YEW4;H0YD21;Q5TC12-2	ATP synthase mitochondrial F1 complex assembly factor 1	ATPAF1
46622856	70392176	0	0	81059680	57818880	36352680	4753339	0	0	30153774	0	0	0	0	0	52132584	40166540	39369528	38158712	0	0	0	0	0	0	0	0	0	0	0	0	0	0	0	0	8	1	1	27438	1	-2	Q5TC12-3;E9PPX6	Q5TC12-3	ATP synthase mitochondrial F1 complex assembly factor 1	ATPAF1
932594432	96088672	731335360	1045184512	1145426176	688712640	103210080	683425984	1017822016	1096275712	911502208	862733056	797729088	662889024	932441152	778094016	1237231744	1054259200	1261896704	866512640	1798456320	761743424	1067928576	15797414	532853568	325991840	432276384	355175744	776766976	548591104	609462400	57154124	356862560	704019520	946376128	894249984	9	9	9	32772	0	12756	Q8N5M1;C9J2Q2;K7ELC1	Q8N5M1;C9J2Q2	ATP synthase mitochondrial F1 complex assembly factor 2	ATPAF2
1471074304	1363728128	470999872	1705186048	1674977664	213238208	2235189248	2204175360	1546170752	199614944	2700516608	2167391232	227484384	1283498496	1725538048	2416832256	252109280	2141426944	1902828672	1504276224	1127917568	1309411584	4783621120	50085868	1830645760	5017802240	2269457152	2558998272	3909739520	3479377152	296506272	3311018240	3741372672	5010234880	3819492864	1731121152	6	6	5	12249	0	37057	Q9UII2;A0A0B4J230;Q9UII2-2	Q9UII2	ATPase inhibitor, mitochondrial	ATPIF1
4039307776	2893440000	4159048704	4299675136	3543033088	3793709824	4102257664	4676809728	4284677888	4344616960	621718720	3473895680	6456812032	3982937344	3543419904	3795790336	2574916096	2550368000	4526757888	3907469824	1615198464	2293761280	1025622592	80494456	2431358464	2194031872	3079420672	210062432	1334144640	154575856	1255437952	1430830208	2206162432	0	224524976	0	2	1	1	65922	0	12986	Q9UII2-3	Q9UII2-3	ATPase inhibitor, mitochondrial	ATPIF1
78289608	87427120	8787665	79250368	107427416	109382328	147277952	111589472	112836520	128731440	121839328	173458864	93735816	112920320	101253344	93059728	117106848	134912000	109795472	102393976	110004248	144154064	127422792	102833360	233614880	20585300	219743712	243530560	264576304	27570972	263362864	288460992	308417152	277973408	296037664	337842368	47	47	47	30136	0	19806	Q13535;Q13535-2;Q13535-3;D6RIG7;H0Y9K2;H0Y8Y6;D6RFJ6;H0Y8R8	Q13535;Q13535-2;Q13535-3	Serine/threonine-protein kinase ATR	ATR
5174213632	506595520	6554589696	6772049408	526424640	2281634048	2527473664	148955424	3965390336	2293900288	2743652352	2077318272	4065477888	4002538496	3004007424	4217222656	1641077120	344585760	4906768896	2070529152	5398774784	2539630848	163396672	843310912	2870755584	3181942528	4119734784	36186268	3289399552	3090508800	3047924480	3243055616	2622594048	294241344	3442019072	3431461376	12	12	12	85837	0	29683	Q8WXE1;Q8WXE1-2;Q8WXE1-3;A0A0D9SEH2;Q8WXE1-5;C9IZM8;F8WE08;F8WEI5	Q8WXE1;Q8WXE1-2;Q8WXE1-3;A0A0D9SEH2;Q8WXE1-5	ATR-interacting protein	ATRIP
15707961	169144512	157034592	14402081	178900720	174422976	155138480	162273856	187652896	127928672	176813856	168903664	170076064	1243819	161389824	11824596	111070688	100122248	133316336	118190080	100525808	109112176	54508096	112281536	76250848	130856968	55907788	135957152	70351560	140087008	136932384	136266800	85382904	115104736	155865280	125525728	42	42	42	28258	0	31679	P46100;P46100-4;P46100-3;P46100-5;P46100-2;P46100-6;A0A096LNL9;A0A096LNW1;A0A096LNN3;A0A087WWG0;A0A096LNL6;H0Y3T0;A0A096LPG6;A0A096LNR8;A0A096LNX6;A0A096LP59	P46100;P46100-4;P46100-3;P46100-5;P46100-2	Transcriptional regulator ATRX	ATRX
3500557056	3858942720	3932078848	3971131392	4673646080	482903008	4688894976	4664440320	5682651648	550550848	517204288	5851745280	3145658624	3768628480	3273132032	380840800	4252655872	4860812288	4121100544	383632224	5592363008	5356244992	3488280832	3932629760	6799023616	5953902080	6141596672	6001445376	6446188032	6084389888	6878177280	590626496	6021469184	6166503424	7116530176	7440318464	17	17	17	53488	0	32331	Q9UBB4;Q9UBB4-2;B1AHE4;B1AHE3	Q9UBB4;Q9UBB4-2	Ataxin-10	ATXN10
0	0	0	0	0	0	0	0	1182283	0	0	0	61592952	119849392	0	68996536	0	0	4633991	0	0	0	0	0	0	0	0	0	0	0	0	0	0	0	0	0	2	2	2	73305	1	-2	P0C7T5	P0C7T5	Ataxin-1-like	ATXN1L
6095879	6292182	6693455	6564229	0	10365708	0	13009093	14325655	0	9589857	0	0	10739757	8631299	0	8846194	1100638	7656019	8688036	9918586	10126798	11483757	6756564	0	0	0	5330879	8885871	9546187	0	0	7564879	0	15273879	0	3	1	1	45809	34547	21056	F8WB05	F8WB05		ATXN2
9068195	6214915	10553091	4571903	8426443	6436724	5961025	14009091	1324118	19225304	1964822	13931811	0	1481715	4497208	5875412	9287404	7073198	10785584	6578002	5666124	8140068	10367792	7467816	12687389	13731593	8330529	1201918	14807135	12395991	19265004	21687652	1199894	12768239	12930252	5292016	14	1	0	11388	1	-2	F8WB06;F8VRK6;F8W0B5;F8VVY6	F8WB06;F8VRK6		ATXN2
228198432	222010624	19740456	173773552	222913520	239811584	215417040	316595424	199740544	276447136	280246240	311149152	181130784	198408784	160746096	201896496	26673564	266528160	270254336	246439152	180818976	211628720	362470784	25639338	270006976	334095168	265574288	362428960	276088640	26787928	304055264	456279744	323034528	278818080	242097328	142028016	15	15	2	14028	0	14758	Q99700;V9GY86;Q99700-4;H0YH87;F8VQP2;Q99700-2;Q99700-5	Q99700;V9GY86;Q99700-4;H0YH87;F8VQP2;Q99700-2;Q99700-5	Ataxin-2	ATXN2
151559936	1617813248	1503860480	1424071808	172397424	179926192	2061453952	1772779392	2189920256	2404245248	316591648	2352690432	1840399232	1621014528	1445946368	1338187904	1794435840	1608721024	162973568	1899821056	1696947456	1819670784	2198969088	1849561344	1856592640	1767289600	1328521984	1697590400	1901152512	2027162624	2047895040	213716464	2793494528	2539450624	2479350272	2212344576	27	27	1	11337	0	32331	Q8WWM7;Q8WWM7-6;Q8WWM7-8;Q8WWM7-5;Q8WWM7-4;Q8WWM7-9;Q8WWM7-3;H3BUF6;Q8WWM7-7;H3BSK9;H3BUE3;H3BSQ5;H3BRB0;A0A0C4DGL7	Q8WWM7;Q8WWM7-6;Q8WWM7-8;Q8WWM7-5;Q8WWM7-4;Q8WWM7-9;Q8WWM7-3;H3BUF6	Ataxin-2-like protein	ATXN2L
0	0	0	0	4261584	0	676305	3538645	0	6735293	5741601	10550975	0	0	3018696	0	2325304	0	0	0	0	0	0	0	0	0	0	0	3556888	4422858	6552253	0	5767641	10199412	9309973	8685864	27	1	1	11192	1	-2	Q8WWM7-2	Q8WWM7-2	Ataxin-2-like protein	ATXN2L
199048672	187071680	160969280	164796816	156205152	231655120	226016176	220892384	203440272	232196368	224575824	216126688	222783504	207003056	209523584	168467504	244484336	322735136	169178896	231688720	183184672	178974768	334994368	299362656	237015616	237715520	218956240	299162944	230314496	271513952	333518560	390109280	265357696	408197760	33675888	204551712	8	8	8	4178	0	78929	P54252;P54252-2;A0A087X1A8;G3V3R7;F5H211;P54252-4;G3V328;G3V4U9;C9JQV6;D3VVH9;A0A0A0MS38;P54252-3;G3V2G1;G3V3T6;A0A087WXY4;G3V2G2;G3V526;E9PJN5;P54252-5;S4R399;G3V4F5;G3V4F4;G3V5H3;G3V3A6;D3VVP3;G3V3T0;D6R9I5;G3V4B1;G3V390;G3V3S5	P54252;P54252-2;A0A087X1A8;G3V3R7;F5H211;P54252-4;G3V328;G3V4U9;C9JQV6;D3VVH9;A0A0A0MS38;P54252-3;G3V2G1;G3V3T6;A0A087WXY4;G3V2G2;G3V526;E9PJN5;P54252-5;S4R399	Ataxin-3	ATXN3
0	0	0	214271	3385299	9673406	27074358	0	0	9215683	15305392	27014816	5847034	8454814	6104947	6257919	6706063	9935454	6300488	5308056	11140326	11952671	16844608	10965836	0	5017166	0	0	0	0	8217929	10512245	0	0	6425073	6373207	3	3	3	9545	15632	5985	O15265;O15265-2;O15265-3	O15265;O15265-2	Ataxin-7	ATXN7
304498016	285698944	275551040	355399232	341524992	266483792	255364496	267884656	367298336	396691168	325531424	410620736	449042304	290084576	337074624	145128320	29168904	0	404303040	43187844	163963984	363132576	308157600	50418292	139501920	0	0	271863936	268373968	279991776	232592432	226282528	173803248	295669152	228080608	562147136	2	2	2	10771	19337	27293	Q96GX2	Q96GX2	Putative ataxin-7-like protein 3B	ATXN7L3B
252786816	17063960	202086128	253819280	194115088	287039968	517846208	378664224	260690096	220371104	451281600	354346624	297361952	256131600	400470464	36959608	543995840	328919808	534169888	481774176	583833024	295405760	336876640	484623040	607767424	73353504	766956800	707289216	802531648	789251008	739610496	674304704	876250880	809874880	792219520	741668288	8	8	8	53028	0	54879	Q9Y679;Q9Y679-2;Q9Y679-3	Q9Y679;Q9Y679-2;Q9Y679-3	Ancient ubiquitous protein 1	AUP1
137830496	129820056	239135984	234034576	3242693	230144224	199953360	195815968	366333568	268013600	28635180	289062720	176289840	234531408	159296592	141664816	131059072	260833968	278710112	214557152	32604656	272000064	177159616	256227808	213694080	333069728	309284160	357320256	470687968	44715804	406387168	522323488	477942208	49902264	581611136	659613568	9	7	7	45809	0	23522	O14965;A3KFJ0;Q5QPD4;A3KFJ1;Q5QPD2;Q5QPD1	O14965;A3KFJ0;Q5QPD4;A3KFJ1	Aurora kinase A	AURKA
2176140800	2206410752	2554324736	2631808512	2516346880	2542725632	150771840	2463526400	2400519936	2314323456	1881891968	2253880320	2030223488	2012292096	1998569984	1956828032	1740998016	1887401088	1764211072	1699179392	2163022592	1833567744	1046966336	928270400	505851360	433411424	714357824	382830752	554160448	797371520	497677120	701577472	657382080	682317120	578500672	1032066304	15	15	2	3931	0	60112	Q96GD4;Q96GD4-5;J3KTD6;Q96GD4-2;Q96GD4-3;J3KRF8	Q96GD4;Q96GD4-5;J3KTD6;Q96GD4-2	Aurora kinase B	AURKB
35348052	31962884	17654368	30365496	44205188	47119464	72582944	44562212	46196032	59207264	70650416	5370129	76850240	38558584	29459364	3486419	68672112	4347204	54793984	42455268	19250542	42790996	87147936	47213280	0	86557640	100541264	86002128	87773264	133721936	94128656	112986040	22851272	200616112	162566400	143847152	14	1	1	3476	44241	42273	Q96GD4-4;J3QR41;J3QLN8;J3KT86;J3KRJ2;Q9UQB9;Q9UQB9-2;B4DXA6;A0A0A0MSY3;Q5Y191;Q9UQB9-3	Q96GD4-4;J3QR41;J3QLN8;J3KT86	Aurora kinase B	AURKB
14462933	11106505	11579542	8964261	3245727	31557682	24258680	20404800	14023753	25974222	23572722	28952764	0	25265060	78682	16276643	16462926	24839488	2050169	26748152	16169982	28410774	35454244	247442	190806	15914851	9650916	10625774	23168922	137147296	12205509	39579120	276698144	150843968	167831536	3223565	5	5	5	13898	0	28652	Q8WXX7;Q8WXX7-2;A0A087WVB5;Q75MD7;Q8WXX7-5;H7BZZ9;H7C090;Q8WXX7-3	Q8WXX7;Q8WXX7-2;A0A087WVB5;Q75MD7;Q8WXX7-5	Autism susceptibility gene 2 protein	AUTS2
237149808	252647152	244913760	224179520	337237920	342501664	5042506	43069280	31548376	273026528	282541184	39699376	542151616	534243232	326905280	55409036	620223424	637508160	4196926	454201952	342874880	443862272	376132064	418954624	433611328	332723328	54210824	409590464	458946976	601934784	500117632	710714624	692180608	339423296	485007072	461971264	7	7	7	38506	0	15187	Q9NQS1;H0YKR0	Q9NQS1	Cell death regulator Aven	AVEN
1079615104	1166461696	1612400128	1299029120	1388349056	1081664384	1066786880	878419968	128564520	987979712	1055346368	1012352320	1285616128	1166995328	1109330816	1170218624	951343488	857971328	1104387968	1024163840	1456797056	1108664064	77117264	821892544	817053568	935787264	976897856	1095643904	504286976	1038089024	892057216	997759296	627087424	84013800	1082194176	97352728	17	17	17	71947	0	696	Q8NBF6;B8ZZW5;Q8NBF6-2;H7C0I1	Q8NBF6;B8ZZW5;Q8NBF6-2;H7C0I1	Late secretory pathway protein AVL9 homolog	AVL9
635211968	641772736	565268224	381167616	541987840	303983552	178095712	153195664	500001376	127505912	188955024	210208496	505121184	487231360	260466816	492359360	152471904	147999792	173731456	116174392	384620000	15939925	170339104	256008672	646899648	562812032	1208154880	730102336	508230816	549588224	624170880	497823936	581848000	500282528	706391232	579229056	8	8	8	34258	0	32889	P25311;C9JEV0;H7BZJ8	P25311;C9JEV0	Zinc-alpha-2-glycoprotein	AZGP1
198909632	132782208	361432000	331509792	250504576	384008928	0	470504576	934281600	412203392	586112128	480887200	153504544	365072704	568515008	31691100	302406368	191845280	252196528	468910528	640727552	29244256	294944928	205920656	384580992	112133528	356109408	310294080	354003200	171122912	354315648	232208272	244117616	522365408	532171488	371587968	4	1	1	84984	27056	23648	H0YLF3	H0YLF3		B2M
8541302784	6681970688	7384850944	5722685952	8089906176	7175296512	5850641408	7529342976	1235178752	1140147072	1403880192	1023021376	9203264512	9640656896	5554947584	8946518016	7598000640	7406316544	948535168	9824418816	659516480	8171901440	1344895232	1051343296	5923779584	7964728320	882811456	7132705280	8686802944	1091323648	7031532032	8153798656	980797568	8434370048	1032893504	7884843520	5	5	2	13714	0	68477	P61769;H0YL18;F5H6I0	P61769;H0YL18;F5H6I0	Beta-2-microglobulin;Beta-2-microglobulin form pI 5.3;Beta-2-microglobulin	B2M
0	0	0	90420640	0	0	233731232	0	19029720	0	206114208	217592976	0	0	0	11827406	10958411	20351120	16556588	0	15315629	0	9664274	159445184	65274	46276640	23593184	86640032	3344317	41013616	37514060	4499053	5983205	42031704	403976	52095736	3	3	3	37137	72119	36492	Q96L58	Q96L58	Beta-1,3-galactosyltransferase 6	B3GALT6
55086144	37477800	12847235	50318488	6405549	33652884	20137802	23087156	15446478	0	23350488	37932908	12211569	57286988	25947968	25355132	1850522	25210282	62812536	22843704	42780104	27897948	17811712	16626439	0	0	35727868	9595633	0	0	0	0	0	40194	29177916	0	4	4	4	56563	43911	40054	Q6Y288	Q6Y288	Beta-1,3-glucosyltransferase	B3GALTL
262746704	381380352	30261454	252161344	93517704	243288064	277179424	364499936	345040032	11696877	400570848	18878812	166422176	230953120	36745288	205535296	211694048	447689216	296906656	17964272	507850560	4354539	496204160	672583552	15454386	13028408	208625840	59594976	140804160	177314784	318325952	331626880	15813038	160934992	240284720	243911664	7	7	7	37121	0	33844	O94766;G3V150;O94766-2;E9PNA1	O94766;G3V150;O94766-2;E9PNA1	Galactosylgalactosylxylosylprotein 3-beta-glucuronosyltransferase 3	B3GAT3
0	14423547	0	0	0	17599748	0	0	0	0	0	0	18636540	21271064	0	17636680	13269882	0	15402959	10851892	39660180	29054544	15943311	21415116	0	0	0	0	0	1441321	0	0	13342046	0	0	23287466	1	1	1	46021	34621	21361	Q9NY97;Q9NY97-2	Q9NY97;Q9NY97-2	N-acetyllactosaminide beta-1,3-N-acetylglucosaminyltransferase 2	B3GNT2
171433312	146372128	249515616	227497152	382247616	318606752	545744320	354781504	671565568	509254816	514085184	479144928	58238424	470682176	250691312	415217792	337719872	462210272	335812672	244900432	882655616	821385152	785795968	819948032	170506432	388904224	157752048	25101318	231033552	167630304	179748896	254490784	241007664	198867632	390060928	283339552	7	7	7	4392	0	215	P15291;P15291-2;Q86XA6	P15291;P15291-2	Beta-1,4-galactosyltransferase 1;Lactose synthase A protein;N-acetyllactosamine synthase;Beta-N-acetylglucosaminylglycopeptide beta-1,4-galactosyltransferase;Beta-N-acetylglucosaminyl-glycolipid beta-1,4-galactosyltransferase;Processed beta-1,4-galactosyltransferase 1	B4GALT1
33229352	25147226	65896588	62187448	140562352	104058904	162269232	61177888	152042848	129263648	135020512	102781576	34708964	75648768	59897124	66711260	88826832	106497160	77726336	996442	14594273	129555384	109174320	116827328	13948985	8958222	21172968	8529066	70324624	82419704	70403576	82693800	87305744	25714868	31508752	8897202	3	3	3	43927	27089	23793	O60512;O60512-2	O60512	Beta-1,4-galactosyltransferase 3;N-acetyllactosamine synthase;Beta-N-acetylglucosaminylglycopeptide beta-1,4-galactosyltransferase;Beta-N-acetylglucosaminyl-glycolipid beta-1,4-galactosyltransferase	B4GALT3
26266266	44507096	52507800	54028036	78918256	87236984	50419136	45141988	107937144	71631344	89550744	65808764	20464856	41291416	3558874	45546564	48194636	44305952	58626480	58648432	93747272	3883333	67696776	69378384	0	0	0	0	0	0	0	0	0	0	11363905	0	3	3	3	40041	43776	39301	O60513;C9J3R8;E7ETS9;C9J4S5	O60513;C9J3R8;E7ETS9	Beta-1,4-galactosyltransferase 4;N-acetyllactosamine synthase;Lactotriaosylceramide beta-1,4-galactosyltransferase	B4GALT4
23611042	26272452	0	0	101598912	0	7960251	0	0	0	0	50550856	24140288	0	0	8764975	0	29526408	7398357	0	9376416	10181655	929028	0	0	20037286	1111092	20781708	21160324	185266	24549612	30649032	22427938	19625108	21922684	2159457	3	3	3	47119	0	11538	O43505	O43505	Beta-1,4-glucuronyltransferase 1	B4GAT1
205434720	169476096	203128480	171535680	146813040	22126216	291900896	191477024	175666480	289195040	208611328	322666848	181331440	184355360	197780016	209341008	279884992	317364576	18963576	241597168	269322336	256482208	404819424	32165384	297897056	327788768	166419712	438345728	352019008	407648832	326808608	532143232	39101988	511095808	448118176	402639104	6	6	6	3656	0	22533	Q9NWV8;J3KQS6;M0R0I0;Q9NWV8-3;M0QY17;M0R3F4;M0QXG9;M0R2A4;M0R2K3;M0R193;M0R2I2;Q9NWV8-2;M0QZ44	Q9NWV8;J3KQS6;M0R0I0;Q9NWV8-3	BRISC and BRCA1-A complex member 1	BABAM1
13683678	9220227	1746066	14799613	26482204	21954834	2341432	26890966	14054168	1560708	14397586	22384492	39697504	35861156	28363084	3631382	34579096	1417581	21349436	4528941	25314876	28720924	22374832	11274803	0	0	0	61987080	0	3172915	0	0	22982580	0	0	0	6	6	6	81957	0	27465	O14867;C9JMP6;C9IYR0;C9IYH8;H7C4B6;M0QZP0	O14867;C9JMP6;C9IYR0	Transcription regulator protein BACH1	BACH1
39067412	45402164	36076748	32649620	6038949	27859932	22834304	21108318	0	0	5416051	0	18321928	18512704	1182125	0	32016654	18443148	10543205	20001344	0	12196758	503153	0	131694832	158861920	94876664	220985104	177734544	180915072	198481408	202538400	225889872	136084032	175699072	176359504	9	9	9	92536	0	25743	Q9BYV9	Q9BYV9	Transcription regulator protein BACH2	BACH2
23875784	28489332	0	48423344	20157238	0	2046316	22538362	0	24181624	31580414	75580240	16506295	1569539	0	7064266	2318102	0	19220312	0	0	0	259793104	304125216	43587368	83990672	4607542	54440804	163595872	84968824	104415848	67678976	153688896	209308176	137967408	154439872	5	5	5	18392	0	10777	Q92934;F5H3B1;F5H1R6	Q92934	Bcl2-associated agonist of cell death	BAD
556614464	660475584	264455472	549987648	680272512	578216064	1066318912	773437440	624823936	917050624	771003776	68659160	363868064	309511488	457490880	359042336	619208576	706503296	77176160	581610496	534728064	461879712	483534976	612269440	704535808	674200768	1024989888	1067797312	788946880	777125120	80194912	682291776	1062391936	963295808	792644096	773638528	6	6	6	38778	0	11877	Q99933;J3QTA2;Q99933-4;Q99933-3;Q99933-2;C9JYK5;F1LLU6	Q99933;J3QTA2;Q99933-4;Q99933-3;Q99933-2;C9JYK5	BAG family molecular chaperone regulator 1	BAG1
796965888	1103127296	1102664576	1401111936	979161664	996052416	1641017472	1010010752	1009491840	1002937792	952344576	1064967360	769069376	990989696	951209600	100148176	988172160	122160936	968275200	1112351232	814686656	940641408	1207895424	1058411712	5917378048	5513760768	5289392128	6259171840	6271652864	5581427200	6551124992	6243108352	5047672832	4592573440	5322633216	4287118848	10	10	10	23772	0	6112	O95816;O95816-2	O95816;O95816-2	BAG family molecular chaperone regulator 2	BAG2
201550352	248220672	23581444	111277440	64983144	203543792	143695552	146867248	114106640	236888272	238170272	217014736	157773984	160070208	131846896	132139600	136754800	235417408	209445904	136326352	157809200	102090648	302028160	263562	170724848	175208368	212828576	23433704	313562912	258550128	320078144	497204992	257323376	23796858	314805120	313929376	16	16	16	61594	0	32999	O95817;C9JFK9	O95817;C9JFK9	BAG family molecular chaperone regulator 3	BAG3
31264156	69944840	3939674	71582336	52054348	12564282	121322840	7733676	98736128	174447408	100374392	118424832	86385320	116981744	116152080	9495702	12804777	121715472	115442168	7499089	171516400	12550313	219951760	211329568	204618880	216942256	171849344	224332640	190809952	214450208	236203840	330727584	184651616	275936448	260875040	320203360	8	8	8	49593	0	81206	O95429;O95429-2;H0YBT1	O95429;O95429-2	BAG family molecular chaperone regulator 4	BAG4
842631744	549419520	47289784	673363968	475141376	547420160	506723360	539825792	442049632	470088000	622973824	528212960	719517120	557240000	513833920	514916736	492061632	527530944	589145984	679635456	627525120	404084320	622945216	414704608	767050176	797158080	780418816	710160704	759747008	619176000	60346268	524683744	596975424	680122048	710307392	602527424	15	15	15	51199	0	88857	Q9UL15;Q9UL15-2;G3V274	Q9UL15;Q9UL15-2	BAG family molecular chaperone regulator 5	BAG5
2050687872	177763856	2352474624	2554994432	3059137280	2547786240	363701760	2384576000	3334457344	2937230336	3163375360	3050699520	2685667328	2638799872	2462105088	2559430656	2139398656	2943903744	2873203200	2594875136	3575892224	3106073088	2692079616	2715597312	1658849280	1764897280	1464790272	1511441152	1808785920	2160233472	221324592	2354039808	2190133248	2135829504	2354200832	2728244992	32	32	32	11941	0	32331	P46379;A0A024RCR6;A0A0G2JK23;P46379-2;P46379-3;A0A0G2JL47;P46379-5;P46379-4;F6S6P2;X6REW1;A0A0G2JJM1;F6WML8;F6VEM6;F6X9W3;F6U341;F6XTU0;H0Y710;A0A0G2JJR8;F6UR09;F6U1F2;H0Y4L1;F6TC96	P46379;A0A024RCR6;A0A0G2JK23;P46379-2;P46379-3;A0A0G2JL47;P46379-5;P46379-4;F6S6P2;X6REW1;A0A0G2JJM1	Large proline-rich protein BAG6	BAG6;BAT3
3146281	0	70236	5134132	39537864	4512995	24943418	3299867	3153793	19570662	18836616	18232588	900261	2426529	4172286	2713752	4345034	28556676	1560926	3371533	2928202	2739109	10599632	416219	3011537	0	0	7245567	0	40089868	47191816	32726362	0	43376472	49641840	37254320	13	13	13	27693	0	12475	Q9P281;F8WBW8;A0A075B747	Q9P281;F8WBW8;A0A075B747	BAH and coiled-coil domain-containing protein 1	BAHCC1
4508225	11118249	0	0	11848305	5134785	4610956	0	10965828	6111215	6152354	6565079	11788513	6337962	14484703	0	4499757	9091704	4146326	6238985	14144963	10637446	9564354	450046	3445212	0	0	7640504	0	0	0	0	0	3448979	16065306	0	2	2	2	84651	0	10197	Q8TBE0;Q8TBE0-3;Q8TBE0-2	Q8TBE0;Q8TBE0-3;Q8TBE0-2	Bromo adjacent homology domain-containing 1 protein	BAHD1
0	0	0	0	0	0	11479227	0	0	0	0	0	0	16440995	22808816	0	16042472	17469620	0	15240726	1300709	10299068	0	15018928	22107484	23785560	91020880	31860104	17135040	12483636	25267354	14455225	12612681	11060944	41629632	8772469	5	5	5	56882	0	24137	Q9UHR4	Q9UHR4	Brain-specific angiogenesis inhibitor 1-associated protein 2-like protein 1	BAIAP2L1
3205788	11435673	69521400	97454240	0	102436888	90524184	0	56691840	153877248	168260416	0	23480646	85996560	76678664	149788496	7971673	263582848	76144104	0	155587760	19145706	507152608	567916800	1909618560	87901616	2568780032	0	2357145600	1755103360	1794251136	56950936	34435844	1651379968	2222060032	2386269184	4	4	4	23408	0	30391	Q16611;A0A0A0MRG8;Q16611-2	Q16611;A0A0A0MRG8;Q16611-2	Bcl-2 homologous antagonist/killer	BAK1
192470464	3314557184	1982977408	1537335168	1997974528	2438082816	3504851968	1333198720	2454424064	3348580864	1494242816	2866015232	2774574592	2543470848	1237681536	1799229440	3954953728	190256560	3960052736	2603550720	2643293440	2365071872	338108768	2622280192	1641790336	1677568128	4019538176	3483547904	1750071552	2566707456	2446962688	1306879616	4974959104	1728508160	4003254784	2508765696	9	9	9	10058	0	16635	O75531;E9PJJ8	O75531	Barrier-to-autointegration factor;Barrier-to-autointegration factor, N-terminally processed	BANF1
54264940	58587628	40392008	3780456	23511644	21050980	21929198	37603984	29056838	36652948	61177376	43420000	52348496	57019684	19423886	44243616	19761174	6771088	21410396	6639474	15391109	11989302	40711280	33675880	70622360	81438344	51881636	60005400	44028824	39377940	32289078	37604736	70182584	49638584	60408888	31046788	6	6	6	89281	0	11077	Q8NDB2;Q8NDB2-4;Q8NDB2-3;Q8NDB2-2	Q8NDB2;Q8NDB2-4;Q8NDB2-3;Q8NDB2-2	B-cell scaffold protein with ankyrin repeats	BANK1
74334392	74871896	94509120	96655320	80908288	64281988	71666096	64393076	76234800	66636084	60012452	99080872	83023240	97377744	80751632	95259904	78606176	95526352	63076840	77104480	9801266	88697680	61565364	6759364	52297944	60038612	64319080	69319232	57233944	60544796	84778104	9274674	46505892	62792392	73190776	53053096	3	3	3	56494	0	27862	Q8N9N5;Q8N9N5-3;Q8N9N5-6;Q8N9N5-2;Q8N9N5-4;Q8N9N5-5;Q8N9N5-7	Q8N9N5;Q8N9N5-3;Q8N9N5-6;Q8N9N5-2;Q8N9N5-4;Q8N9N5-5;Q8N9N5-7	Protein BANP	BANP
4075191	58236348	32437298	39293960	81533536	23561706	17912800	35846436	40139456	37182620	27530636	27731308	41438120	29511148	48908748	29762572	12000141	36028832	27883632	8578671	36310968	25023072	28050040	0	67986200	38719772	54965456	56960696	36913012	83041728	68675144	120943520	64250732	64998356	7489036	101599144	6	6	6	80361	0	86921	Q92560;F8W6N3;H0Y8E8	Q92560;F8W6N3	Ubiquitin carboxyl-terminal hydrolase BAP1;Ubiquitin carboxyl-terminal hydrolase	BAP1
461498880	508308000	488930176	466733600	487828576	395613504	241622992	430135680	352444512	355612288	300917472	29081362	506140608	487998016	212444608	674495360	101403072	668245120	455600864	500644128	598121856	320955040	708685632	749440128	426614080	698824512	842919104	1049414656	598400704	847399744	824094656	468704384	1013859712	821585280	907723136	581674688	5	5	2	179	0	44095	Q8IXM2;F8W038;Q8IXM2-3;H0YIS7;Q8IXM2-2	Q8IXM2;F8W038;Q8IXM2-3;H0YIS7;Q8IXM2-2	Chromatin complexes subunit BAP18	BAP18;C17orf49;RNASEK-C17orf49
23172280	16453229	44177032	19110946	33075818	46225048	68014032	39053208	14640434	51341328	50877796	45729736	5033666	33134148	64421544	24401636	84243608	122705688	106379312	142520864	25149408	146934080	16004999	24466254	21262188	1613456384	9084234	175487808	1329104384	1276320256	1931319040	2088892544	51876004	27572100	1882727936	1872770688	9	9	9	86647	1577	62714	Q99728;Q99728-2;Q99728-3;F6MDI1;A0A087X2H0;C9IYG1;A0A087WZ19;Q99728-4;F8WCG2;A0A087X0C6	Q99728;Q99728-2;Q99728-3	BRCA1-associated RING domain protein 1	BARD1
2406403328	2304049408	1488695680	1716883840	1733947776	1921803520	1751421184	2044199424	1472718208	1311831808	1703249408	1899559680	3313491200	285469056	245671296	2716182272	3052719104	2533488128	2636655872	2072800128	1254153088	1630365696	1826994816	1242171648	2676269568	2168946176	2792482304	2450794240	2096632448	357559648	2962722304	3087430912	1693097600	2304972544	2661849088	1153525248	16	16	16	22693	0	32331	P80723;P80723-2;U3KQP0	P80723;P80723-2	Brain acid soluble protein 1	BASP1
0	154550048	111434336	89729704	25171656	62107928	0	0	87931464	0	0	0	19936762	113671400	78132792	98089136	107694264	134182480	88143872	101575048	100658216	8100479	3261406	0	99687552	83222704	199087920	93892344	0	0	127752704	76329264	0	41943912	68035472	0	3	1	1	15922	1	-2	I6LPK7;Q07812-6	I6LPK7;Q07812-6	Apoptosis regulator BAX	BAX
6293073920	6061568512	6848891392	5744393216	8052387328	6460792320	745191936	5709089792	4751525376	4767707648	4797068800	5437107712	7130164736	776384000	6965310976	666591232	6410982400	808011712	6262294528	5445935104	7820766720	6533505536	7999554560	671024320	2921772032	421465184	4499071488	5127885312	6608087552	6360524288	4963291136	6088850432	4052869888	4638689792	430305216	4071045376	8	8	6	21184	0	24333	Q07812;Q07812-5;Q07812-8;Q07812-2;Q07812-7;K4JQN1;Q07812-4;H0YA56	Q07812;Q07812-5;Q07812-8;Q07812-2;Q07812-7	Apoptosis regulator BAX	BAX
302983616	326205216	237440784	382967360	623184832	515569088	748484544	532599424	566512384	682862976	798078016	743832640	422515744	362635872	289275968	320451168	59449948	516533952	549456576	549636096	56866096	639680192	58169520	1300208640	358868960	385361920	355579616	391568864	447368032	574370432	84819056	416668512	553826624	504295136	458636352	673440000	35	35	35	1787	0	32331	Q9NRL2;Q9NRL2-2;A0A087WWN7;H0YJP5	Q9NRL2;Q9NRL2-2	Bromodomain adjacent to zinc finger domain protein 1A	BAZ1A
2171995904	1908640768	1792786944	206671296	2414651392	2431877376	2541872128	2491310592	2423029248	2565906944	2486397696	2471740416	2248944640	2203543040	2154223616	1922501376	2340190976	2049224960	2173189632	234573344	2096956672	2545787904	2287534080	2326195200	865529152	987855936	1002018112	897470912	1101009408	1158873856	1081879808	1094851584	1276060416	1147061504	1218533888	1158229504	60	60	60	1709	0	32331	Q9UIG0;Q9UIG0-2	Q9UIG0;Q9UIG0-2	Tyrosine-protein kinase BAZ1B	BAZ1B
229509584	237166192	224698752	235900736	222688304	273480576	294646176	245966384	270409632	304312704	298299008	232712208	222864736	250870528	258053728	273329664	202067952	293596032	22062888	224626384	346763168	368680128	355492864	38559756	144441488	181020592	81557696	148645168	160351296	187267856	204947216	21628142	234474608	22031896	216542704	214021728	31	31	31	2112	0	25009	Q9UIF9;J3KPG5;F8VU39;Q9UIF9-2;Q9UIF9-3;A0A0C4DGI9;H0YII3;H0YHL2;H0YHQ7	Q9UIF9;J3KPG5;F8VU39;Q9UIF9-2;Q9UIF9-3;A0A0C4DGI9	Bromodomain adjacent to zinc finger domain protein 2A	BAZ2A
4585716224	3809521664	5074922496	185799568	301249760	5038365696	6285296640	347389664	89243840	329747232	13076253	227975328	4835819008	43786068	3704944384	336847168	6305559040	468766400	169850560	70973928	5144979456	7368120832	6808921600	641981440	0	88366696	34483588	71236928	32663644	21099328	4461067	64389828	29193756	23316428	73018760	0	5	5	5	20532	0	38311	Q9BXH1;Q9BXH1-2	Q9BXH1	Bcl-2-binding component 3	BBC3
3576848	66344624	67529856	99613552	50046960	34030172	42353508	39045236	44024900	39422016	7530492	36252296	36732152	63570588	56463060	42599728	38513256	44370716	37078648	30284824	50275688	26859396	20340392	57505132	5059434	7815695	14410261	833021	12780993	16839452	16318926	14707763	1726908	15551956	14799123	6087232	5	5	5	10513	15408	55362	Q8WY36;Q8WY36-2;C9JA69;C9J8D0;C9JYU6;C9JZA0;Q8WY36-3	Q8WY36;Q8WY36-2;C9JA69	HMG box transcription factor BBX	BBX
433532992	705042816	745963648	659600064	68164368	490616416	376354912	399771328	588357696	464539808	554810560	410989856	49189900	584555136	525969312	613530240	361428864	421131328	514500064	478719520	538165312	362170144	42264360	241649152	66345796	336699328	48194808	458634432	104344272	69090152	271985792	104789768	252098896	222544256	258512128	93973040	5	5	5	2832	16329	7602	Q9UHQ4;Q9UHQ4-2;C9JTE9;B7Z2L0;H7C5E2;C9JGJ9;H0Y7N8;F8WB99;C9IYK6;C9JP06;F8WDG1	Q9UHQ4;Q9UHQ4-2;C9JTE9;B7Z2L0;H7C5E2	B-cell receptor-associated protein 29	BCAP29
2590408192	3320787968	2413850880	2192784896	2764018432	2257286656	4274397952	4087874816	2479961600	2198643712	3479182592	241821168	2852422912	2441064704	2926054400	204728880	2969643520	2438898688	4382027776	4492642304	1174796672	251448768	4629123584	2908283136	3057859584	4769047040	3713621760	4722234880	3623760640	3947782400	2954784256	3303291648	5910359552	3365026048	3707064576	326794752	10	10	10	34752	0	13226	P51572-2;P51572;C9JQ75;C9J0M4;C9JMD7;C9JSP1;C9JM14	P51572-2;P51572;C9JQ75;C9J0M4;C9JMD7;C9JSP1	B-cell receptor-associated protein 31	BCAP31
18194776	11749724	41754856	12031852	53916668	12865299	61401352	29359160	36885268	51402148	60134684	77332952	25364368	30945472	59466336	48899516	43943164	92481600	16199129	18583676	56709788	70774224	37143888	49604904	0	9987212	0	923024	0	0	15186413	0	0	14088944	0	0	4	3	3	93371	0	10093	P56945;P56945-8;P56945-7;P56945-4;P56945-5;P56945-3;P56945-2;P56945-6	P56945;P56945-8;P56945-7;P56945-4;P56945-5;P56945-3;P56945-2;P56945-6	Breast cancer anti-estrogen resistance protein 1	BCAR1
1034283520	11501289	768258624	1102698624	1028188736	678420352	1090474496	12926328	625125312	87556568	900906752	698110272	13544698	1037185664	1136125824	915900224	1500109440	1151181696	1246764416	947976576	583449856	1081059968	1535964672	996671936	1319910272	134843952	1498415232	1416381440	976364672	892025856	90285208	1078980352	1965521920	1421050752	1047275456	1256865152	8	8	8	26131	0	39566	O75934	O75934	Pre-mRNA-splicing factor SPF27	BCAS2
26714804	22737644	62068528	39535864	76364520	39858220	46353056	38408200	60156128	56834516	55854520	102711120	4971919	92140232	71928144	51781560	50005560	85221776	42889776	43551536	67369176	74439816	76134368	49000012	41616104	45067644	23396748	42630028	37039144	2387801	22762922	4847415	16244108	11210592	23404252	7672724	8	8	8	10124	0	21549	Q9H6U6;Q9H6U6-2;Q9H6U6-7;Q9H6U6-3;Q9H6U6-8;K7ESE9;Q9H6U6-6;A0A087X207;A0A087X2J1;K7EJU7	Q9H6U6;Q9H6U6-2;Q9H6U6-7;Q9H6U6-3;Q9H6U6-8;K7ESE9;Q9H6U6-6	Breast carcinoma-amplified sequence 3	BCAS3
0	0	0	0	28283784	0	0	0	29813820	0	20152406	0	19632764	0	0	2015548	0	37550716	0	29190436	34365968	62639768	22247108	46630444	0	0	0	0	0	0	0	0	0	0	0	0	3	3	3	22495	57546	18468	Q8TDM0-3;A0A0C4DGS6;Q8TDM0;A0A0C4DH49;Q8TDM0-2	Q8TDM0-3;A0A0C4DGS6;Q8TDM0	Breast carcinoma-amplified sequence 4	BCAS4
2039504000	2582861568	2778611200	2098846464	3183650816	3496643072	5795222016	3706854144	3256583168	3924063488	3660400384	3750500608	252411296	2506515200	1863808384	2467644928	3221086208	2805050112	3337147648	3777111040	4171250432	4619064832	4950507008	3167053312	1833381888	2030616320	1609094272	1469317888	1549298432	1809397248	1918352384	147906720	2053893504	2117006592	1596213632	2223081472	12	12	12	42966	0	79305	P54687;P54687-5;P54687-4;P54687-3;P54687-2;A0A087WYF2;F5H2F2	P54687;P54687-5;P54687-4;P54687-3;P54687-2	Branched-chain-amino-acid aminotransferase, cytosolic	BCAT1
1357400192	1160251648	1452699008	1422328704	1092736256	1022595840	1028760512	754394688	854730560	893414016	783831616	994381120	1473500672	1419291008	1411847808	1538136192	1019973568	1269541248	1100564352	816764992	1429781120	1249491200	1149577728	811438848	709778240	866915520	732604160	756032640	540576640	758909312	655544896	792094464	594597440	700065088	746764224	834496128	9	9	9	44287	0	10937	O15382;M0QZ10;M0QXF9;B3KSI3;M0QZP4;O15382-2;M0R2K7	O15382;M0QZ10;M0QXF9;B3KSI3;M0QZP4;O15382-2	Branched-chain-amino-acid aminotransferase, mitochondrial;Branched-chain-amino-acid aminotransferase	BCAT2
99512256	963829760	1234116992	1387097856	1495672320	1395647104	1853447424	155812560	1733165056	1752792704	2002357888	2118473600	1514295936	927383936	1135247104	13399156	1696826752	1430052480	2165666816	1981672448	1717626496	1756587648	1736550528	148365264	2390691584	1750452992	1592378752	2533835520	1855509888	2019704832	2054085248	1552312704	2543298304	2183984128	2427492864	1825515264	10	10	3	35979	0	24317	Q9P287;Q9P287-3	Q9P287;Q9P287-3	BRCA2 and CDKN1A-interacting protein	BCCIP
0	0	0	0	0	0	0	16220326	0	0	148506864	0	0	16700315	0	0	9109086	117552200	0	0	0	122725976	0	0	0	0	0	53928160	0	53599120	0	63654920	20006118	22119756	57508368	14433615	10	3	3	36214	0	13218	Q9P287-2;Q9P287-4	Q9P287-2;Q9P287-4	BRCA2 and CDKN1A-interacting protein	BCCIP
920767744	934853184	1293519488	1040819904	1016094784	1247356544	1500467840	1199032064	1535403392	1381757696	1284944384	1468986368	660271552	1476525696	1279529216	1329425408	1453824768	1416710528	1204675968	995963392	1392231296	1494285824	1548182272	1792729728	1680872576	158246384	1495106176	1346136832	1082990080	97292264	137916560	1701219712	1606612608	1347659648	678895232	1779847808	11	11	11	5047	0	83918	P12694;F5H5P2;P12694-2;F5GXU9;M0R0C8;H0YH31	P12694;F5H5P2;P12694-2;F5GXU9;M0R0C8	2-oxoisovalerate dehydrogenase subunit alpha, mitochondrial	BCKDHA
0	0	0	0	0	0	0	0	0	13276956	0	16099149	0	0	1311983	0	35344000	22322246	0	22681042	0	28451648	47063024	4152812	158341552	177318064	190191008	147219632	62897656	101849224	79644904	77627264	131577624	108173032	57590668	95614584	2	2	2	43122	0	87974	P21953;P21953-2	P21953;P21953-2	2-oxoisovalerate dehydrogenase subunit beta, mitochondrial	BCKDHB
56388556	57821148	0	67094984	24675082	44828572	164579056	29655992	25981240	125521480	99663104	133355344	152780384	12797342	147430128	140091968	185840560	170684016	130919816	117415024	134258992	168421424	137604528	129145520	232894928	143297776	81499312	235543376	195302368	149149936	223200624	55659836	66155500	39017684	2146881	22453508	4	4	4	4636	0	16248	O14874;O14874-2;O14874-3;H3BTL2;H3BS02;H3BNP3;H3BUV3	O14874;O14874-2;O14874-3;H3BTL2;H3BS02	[3-methyl-2-oxobutanoate dehydrogenase [lipoamide]] kinase, mitochondrial	BCKDK
506583488	445031744	281023648	537843904	362576896	796738176	937218944	92022152	441715840	332794752	849565248	836902144	912770624	1021434624	888987264	984730240	747430144	78780832	8439682	867458240	621837184	725740864	73497192	431286432	461774752	34893576	446175360	430650752	561123264	438649984	395248512	511146208	582840896	764231680	603551104	287733824	6	6	6	26251	0	24772	O95999;A0A087WWW9	O95999;A0A087WWW9	B-cell lymphoma/leukemia 10	BCL10
122462488	145462608	168139104	188747616	209914400	88113544	119626920	96902496	117242872	192803984	88203216	95719648	113906904	138316048	70933456	73624752	166189648	207847088	145066688	114571544	240560384	313235392	217772704	140065008	11222766	12452228	82238912	96809600	150029888	132923720	123634256	87158136	147846144	114229816	112830208	151433200	12	12	11	91196	0	38549	Q9H165;Q9H165-6;Q9H165-2;Q9H165-4;Q9H165-5	Q9H165;Q9H165-6;Q9H165-2;Q9H165-4	B-cell lymphoma/leukemia 11A	BCL11A
4484445184	4237617664	4453526528	4931504128	3762875648	5359163904	5701014528	4116697856	3874748928	2583137792	356688736	4812276224	5062366208	5610812416	6412848640	5297189376	6058003968	5074813952	5957303296	4262635520	5049491456	2360865280	8304019968	8794053632	5493633024	6656241664	7279755776	8967696384	7726896128	4980140544	8460802048	6666411008	6783184896	5702984704	8447806464	8301098496	6	6	6	26266	0	32331	P10415;P10415-2	P10415;P10415-2	Apoptosis regulator Bcl-2	BCL2
878449408	814695040	546812096	86450584	116649952	1056708736	986248064	843965184	1126550144	1106196224	1349531136	1232838784	88823632	99286208	717253440	762594368	1081628160	1494298752	1335219712	1192839296	1486601344	104986824	1118721536	1063239680	354173920	244715856	98010392	184705568	189923312	250234208	272694880	37418380	214937648	20365704	374254176	322485632	3	3	3	26049	15813	63665	Q07817;Q5QP56;Q9H1R6;Q5TE64;Q07817-3;Q07817-2;Q5QP59	Q07817;Q5QP56;Q9H1R6;Q5TE64;Q07817-3;Q07817-2	Bcl-2-like protein 1	BCL2L1
83139888	1123915264	725635584	851199936	854419200	634092544	1073022272	374099040	71025328	504367392	458288384	726252672	1352131968	764143488	541126144	633059264	323625376	634440960	612562752	384786496	590441856	306246784	515172128	825423552	675938176	869529728	479717152	1420263296	947509120	973294784	1380176384	1480070656	1449679360	1256945024	142311088	1764156032	6	6	2	22171	0	4863	O43521;O43521-12;O43521-4;O43521-8;O43521-3;C9J417;O43521-6;O43521-9;O43521-7;O43521-11;O43521-10;O43521-14;O43521-19;E9PAM9;A0A0C4DH20;O43521-13;O43521-20	O43521;O43521-12;O43521-4;O43521-8;O43521-3;C9J417;O43521-6;O43521-9;O43521-7;O43521-11;O43521-10;O43521-14;O43521-19	Bcl-2-like protein 11	BCL2L11
0	39292060	46724972	0	0	0	54248136	0	0	0	0	0	43323344	0	48684184	42302680	21952424	0	30335172	0	47320556	0	0	0	0	0	0	0	0	0	0	0	0	0	0	0	5	1	1	15967	99287	1533	O43521-2;O43521-5;H7BZE5;A0A0A0MRE7;O43521-15;O43521-16;O43521-18;O43521-17	O43521-2;O43521-5	Bcl-2-like protein 11	BCL2L11
4381692	0	36038904	84696608	46418892	101548328	228110032	18495148	1006520128	682180672	848911552	871598528	40141476	155662064	50632264	0	2924676	122274304	249112160	247966688	861612864	247892800	330785824	296479872	0	0	0	30148536	0	27613624	0	0	192405040	102453776	219994240	151625008	6	6	6	26907	0	53677	A0A087WSV0;Q9HB09;M0QZM6;I6LJZ7;Q9HB09-3;M0R1Z8;M0R1K0;I6LJZ9;I6LK00;Q9HB09-2	A0A087WSV0;Q9HB09;M0QZM6;I6LJZ7;Q9HB09-3;M0R1Z8	Bcl-2-like protein 12	BCL2L12
387753952	408990368	358657280	40785172	335178496	413291392	582595840	565760960	64644336	516522976	613053760	310416096	581488576	634879168	429961376	304607008	593151808	494591264	527741216	502514528	687932672	64250004	521431360	687287872	570033088	509876288	754819520	678852928	436224480	553506368	467803072	457363872	530949696	435985856	396758112	399547424	15	15	15	52723	0	18727	Q9BXK5;A0A087WX97;A0A087WTL4;Q9BXK5-4;Q9BXK5-2;E9PDD6;F2Z2C3;A0A087WW80;A0A0A0MR90;F6VJB4	Q9BXK5;A0A087WX97;A0A087WTL4;Q9BXK5-4	Bcl-2-like protein 13	BCL2L13
135632640	124610904	205293792	131038512	210837792	188774848	210205952	197946816	108583504	143946256	126844320	165325712	196302176	192765344	184687952	172904640	182370736	227836896	176723376	155827184	204976544	165770288	122906640	117139752	9314382	39208332	8631388	32223772	8284011	29716692	30713912	31164762	20155306	23697946	29677516	8085865	4	4	4	47583	0	19739	P20749;H7C0A2	P20749	B-cell lymphoma 3 protein	BCL3
29839824	957525	41136112	46025092	73083760	44695532	34885776	32160280	56999676	25006486	25268704	21680240	19353920	28504332	4385467	8876613	13273435	55660060	53351400	1807114	5066797	24487504	63990728	48733212	556793	925666	37196	5289727	285582	4052616	3244195	3646666	3250053	5033068	3819801	2929526	5	5	5	78846	16082	70046	P41182;P41182-2;Q8N143;A0A0C4DH53;C9JL16;C9JCS5;H0YGW0	P41182;P41182-2	B-cell lymphoma 6 protein	BCL6
534552704	619141632	509944128	1069260224	1228763264	1194643584	1063795520	1320407552	965414528	782127360	1080715904	1153290240	1422501632	1278380416	1184587776	1125230720	1544712832	1368828160	1170814464	1219236992	674560384	1218382592	1360323072	987229248	446940704	666622912	54730272	566721152	547341248	412870464	620823360	779402496	831155008	631495744	474339840	461590272	6	6	6	2281	0	12486	Q4VC05;Q4VC05-2	Q4VC05;Q4VC05-2	B-cell CLL/lymphoma 7 protein family member A	BCL7A
0	0	0	0	0	0	0	0	83169688	51420944	0	59145936	0	0	104957504	0	0	43723504	0	0	50612072	57591544	90217176	26737504	0	83251424	0	3313024	130685440	103050664	38214048	47566624	52494464	121962248	38640256	47711648	2	2	2	22195	0	36329	Q9BQE9;F2Z3H6;Q9BQE9-2;Q9BQE9-4	Q9BQE9;F2Z3H6;Q9BQE9-2;Q9BQE9-4	B-cell CLL/lymphoma 7 protein family member B	BCL7B
1587673	0	0	0	1160644	1266308	109066	2381319	1132601	1477167	2815598	1859722	1556569	1392485	888298	107438	0	0	0	1855937	62829	110543	2635527	0	0	2424278	0	2775204	0	0	2128773	0	4133111	2553005	0	1312709	1	1	1	15713	1	-2	Q86UU0;A0A087WZX0;Q86UU0-3;Q86UU0-4;Q86UU0-2	Q86UU0;A0A087WZX0;Q86UU0-3;Q86UU0-4;Q86UU0-2	B-cell CLL/lymphoma 9-like protein	BCL9L
2020981888	1949499392	1859387520	1996263808	2500127232	261369008	2498799360	2423685632	2414903552	2636204288	2669574656	2599010560	2505514240	194777392	2313079552	202621120	249669936	2094853120	2895750144	2978695424	1631881728	2322724864	3366674688	2858004480	2346181632	2906213120	2760149504	2812037120	2785772544	2491539712	2308366848	2686379264	3162524928	2880441088	3335600128	2713461248	27	26	1	10612	0	32331	Q9NYF8;Q9NYF8-2;Q9NYF8-4;H0YF14	Q9NYF8;Q9NYF8-2;Q9NYF8-4	Bcl-2-associated transcription factor 1	BCLAF1
0	0	0	0	0	0	0	0	0	0	0	0	0	0	0	0	0	0	7586003	0	0	0	38270544	21150628	0	23449968	15523443	0	11355609	14465303	18060640	18642384	53010200	45381148	47210864	28636780	26	1	1	10023	15365	29601	Q9NYF8-3;E9PK91;E9PK09;E9PQN2;E9PKI6;E9PJA7;H0YF63;H0YF00	Q9NYF8-3;E9PK91;E9PK09;E9PQN2;E9PKI6	Bcl-2-associated transcription factor 1	BCLAF1
5383535	4903179	0	2661633	2674593	0	0	0	3904557	0	0	4960251	4109848	4483435	0	0	0	0	11803999	0	0	3885923	279458	7768617	19811202	5512887	27701160	25160132	15584586	16080076	8576851	11149996	20097000	14073312	10686483	10822185	13	13	12	19219	0	19451	Q6W2J9;Q6W2J9-4;Q6W2J9-2;H7BYY2;A6NE70;H7C2V9;Q6W2J9-3;H7BZ37;A1A564;H7C231	Q6W2J9;Q6W2J9-4;Q6W2J9-2;H7BYY2;A6NE70	BCL-6 corepressor	BCOR
0	1439419	0	3673787	3753563	11226831	511851	10641383	6626123	7698864	3316273	3547106	19112708	0	19197452	4044137	16194786	16687927	22900656	2605802	3899574	11437022	21899488	1234569	7827647	2854523	3176521	3472068	3517121	3652249	4846063	15737796	2361033	13198118	3359143	9776911	6	5	5	1506	1534	53674	A0A075B6Q3;Q5H9F3-3;Q5H9F3;Q5H9F3-2;H7C4B2	A0A075B6Q3;Q5H9F3-3;Q5H9F3;Q5H9F3-2;H7C4B2	BCL-6 corepressor-like protein 1	BCORL1
174202624	152647664	143401296	156863008	233156720	205067392	205251328	194414640	243504576	167025104	136117504	192541680	122374728	154394976	136429824	172043264	13515068	194504112	97821912	133050432	176252368	14264701	129588576	124376448	233909280	296414304	171309536	202659152	223002496	255798	253620992	343615936	307905952	282008032	291949696	235946384	26	26	25	14282	0	95462	P11274;P11274-2;H0Y554;A9UF01	P11274;P11274-2	Breakpoint cluster region protein	BCR
145804448	167786144	216722544	177144224	307821984	22563274	276049472	181403680	98732008	167483808	200547776	218766048	219233200	99123448	187525840	203891168	251047536	36039576	311049696	277985792	204342768	94589376	93934752	182761360	270856928	154713232	257518208	265442096	325812128	444507616	291432448	452863488	181399808	174461024	174875392	2877524	10	10	10	47534	0	23785	Q9Y276;C9J8G3;H7C492;C9JAS4;C9J1S9;C9J4Q9;H7BZF6	Q9Y276;C9J8G3	Mitochondrial chaperone BCS1	BCS1L
68122688	1048653504	94942384	800218624	139278784	75158504	813320000	109929496	885598784	624702208	811484032	636784512	1060210304	596451712	7321436	977412672	149103392	763604288	1137865856	1114510464	248520048	568894720	1008047808	701446400	2787206400	3393736960	3487455488	3463256576	3418458112	239087104	3118055424	2439860224	2417325312	1727260544	1689763712	2095709952	10	10	10	38157	0	44492	Q02338;E9PCG9;C9K0G7;H7C2W1;A0A0G2JRH6;C9JM78;C9JQ90;A0A0G2JRX6	Q02338;E9PCG9;C9K0G7;H7C2W1;A0A0G2JRH6;C9JM78;C9JQ90;A0A0G2JRX6	D-beta-hydroxybutyrate dehydrogenase, mitochondrial	BDH1
740080896	471813408	461278464	47026796	508953664	521784160	534985088	646763008	451209920	520768320	718284992	696324352	867329024	520277664	406379456	541010880	63207072	41383420	684143040	69445176	174232416	325606304	732994432	25113232	89206088	903684224	791139392	923226240	117717536	890912704	859152128	553237888	811896640	855876864	1452888064	1060084032	5	5	5	26724	0	98635	Q9BUT1;Q9BUT1-3;Q9BUT1-2;D6RFG2;D6R9P2;D6R9U8;D6RIR6;D6RBF6	Q9BUT1;Q9BUT1-3;Q9BUT1-2	3-hydroxybutyrate dehydrogenase type 2	BDH2
19969992	199317440	254121360	278472640	189020768	310996000	210880544	346327584	181613936	97413928	210968864	149966992	240016512	135386848	172234560	147135632	233940096	19454574	243985312	227807872	115862984	133253040	194067408	100534816	66059284	119229128	100005624	146267168	48711372	13546949	126639808	82031536	84014624	106591128	3467018	78437928	10	10	10	51896	0	29379	Q14457;E7EV84;K7ER46;K7ELY9;K7EN35;K7EMA2;K7EQQ7	Q14457;E7EV84;K7ER46;K7ELY9	Beclin-1	BECN1
52310808	35492912	40822548	55372228	65981560	52808004	6671269	111291400	35142448	6905084	64282884	67686920	80590776	59215188	47328948	52354216	68801600	66796624	81199688	81673536	6812105	58934516	55144872	34827704	56261180	27408618	56216160	5097386	57333872	5328885	79192992	50329056	55806628	4578493	54476508	55675452	9	9	9	94474	0	15477	Q5T5X7	Q5T5X7	BEN domain-containing protein 3	BEND3
821984192	663169856	1026743040	1185834880	1023109696	868699072	946730688	1317090688	1403262080	1249797376	1448041216	1137918080	1664456192	1517352832	1549738240	1514100864	1295144704	1496896384	1801730560	1379749376	1764046080	1534418304	1489536640	2338047488	1091033600	789849984	110604504	624928704	724654464	1011495872	152853472	222651104	691465408	796425408	445535488	276474816	4	4	4	13289	0	2208	O15155;H7C1N3;C9JTT8;Q68DU7;O15155-2	O15155;H7C1N3;C9JTT8;Q68DU7;O15155-2	BET1 homolog	BET1;DKFZp781C0425
0	0	0	0	124928016	131191872	0	0	149188032	195490672	0	22153674	0	165330304	11644541	186536816	264102784	18181018	233491008	205172976	157495136	263340128	410147200	519186880	145047696	116670928	0	0	173404912	246813392	192032960	12555127	149554944	207752688	193171488	18945008	1	1	1	12388	0	9168	Q9NYM9;H7BXT7;E9PHY4;A0A0C4DH16;B8ZZS0	Q9NYM9;H7BXT7;E9PHY4;A0A0C4DH16;B8ZZS0	BET1-like protein	BET1L
10449224	5659991	0	0	0	8560018	8219418	11556866	0	0	7170782	0	0	10070285	9286908	0	7729043	10897379	0	0	0	0	5578829	12709431	0	0	0	0	17150064	0	0	0	0	0	0	0	5	1	1	11075	29922	46146	Q96G01;Q96G01-4;Q96G01-3;A8MVZ6;F8VZX7;F8W056;Q96G01-2	Q96G01;Q96G01-4;Q96G01-3;A8MVZ6	Protein bicaudal D homolog 1	BICD1
48289012	549243328	64890056	51572800	801227904	84499232	668100800	5662974	709186176	410393056	544177408	49905748	555355648	665673088	494083712	443974752	768604992	770619008	492374048	758776704	641393664	484447808	521211392	544697472	1107126144	1058816256	833469312	1122989440	1301357568	1338508032	1253112320	1326604928	1340639360	110675736	1322365824	1151775872	33	33	29	93532	0	25449	Q8TD16;Q8TD16-2;U3KQF7;A0A087WYJ7	Q8TD16;Q8TD16-2	Protein bicaudal D homolog 2	BICD2
7780724736	6718890496	1204861184	8777819136	4440521216	6496312832	5522034176	7302683136	1113455872	9983140864	1277642240	8758298624	4420540416	9764570112	6245203968	7250990592	5462930944	1035047680	7307790336	6948196864	1273011328	1334745856	9279048704	6706761728	2481924352	2484879616	2189111296	3733658880	2918212096	22847772	243049536	2639409408	1817702272	3486469632	3923735040	2905317632	8	8	8	26836	0	32331	P55957-2;P55957;P55957-4;B2ZP78;P55957-3	P55957-2;P55957;P55957-4	BH3-interacting domain death agonist;BH3-interacting domain death agonist p15;BH3-interacting domain death agonist p13;BH3-interacting domain death agonist p11	BID
248891392	232464480	96607072	146364640	290822112	95142728	174643232	259148528	282125696	155763760	109858960	8390414	516150240	480719808	117658888	32426064	60267732	136778992	132683264	94071616	240929600	27557896	213552800	206948112	0	110353184	48359848	20121280	117229688	1995584	27569252	126900568	47157908	0	32730182	0	1	1	1	18016	1	-2	Q13323	Q13323	Bcl-2-interacting killer	BIK
36376432	2435977	36647904	3373918	0	25315268	33076376	0	15576671	40806556	14979587	44176484	0	23258340	44309044	0	10807587	0	14053369	0	0	0	13030254	14189015	0	7534274	0	0	0	0	0	0	0	0	0	0	3	3	3	64699	15256	51509	O00499;O00499-10;O00499-2;O00499-9;O00499-7;O00499-8;O00499-4;O00499-6;O00499-11;O00499-3;O00499-5	O00499;O00499-10;O00499-2;O00499-9;O00499-7;O00499-8;O00499-4;O00499-6;O00499-11;O00499-3;O00499-5	Myc box-dependent-interacting protein 1	BIN1
875219712	982967936	67816808	960670144	426075136	699553088	633263232	99345400	497591104	521903840	609294464	728537088	1125778304	848998080	1115847552	1022824000	740465856	771362560	535985408	789931968	39121696	588721152	63013544	69955368	629903296	387876160	40518388	545328320	414397856	532038496	714924416	660648064	371011744	405243392	554285696	505435776	11	11	11	29665	0	22769	Q9NQY0;H7BYV6;Q9NQY0-2;E5RHU4;E5RJI6	Q9NQY0;H7BYV6;Q9NQY0-2	Bridging integrator 3	BIN3
33678752	85345288	22442232	15486413	0	11373652	10924827	10245348	26165536	10982932	1700682	47030672	5558934	13598887	12582375	28219288	20585652	20268052	27667368	30429536	10070743	15720562	57824504	33692808	0	37309864	7606178	0	0	0	0	18599378	0	0	20052868	0	3	3	2	68371	29994	47201	Q13489	Q13489	Baculoviral IAP repeat-containing protein 3	BIRC3
28231198	240543104	132278320	39132496	303358656	333792320	451676128	28716940	349387264	409211680	390491520	406929472	27193840	243724416	362304320	23949692	421593536	398291488	404426752	350543168	523780512	508571232	520971040	591926400	246837504	158235200	267605200	216224096	325056096	337254208	413032096	280178144	53414416	320411776	452657664	411287104	5	5	5	16389	0	14505	O15392;A0A0B4J1S3;H3BLT4;O15392-5;O15392-4;O15392-2;O15392-7;O15392-6;O15392-3;K7EMW2	O15392;A0A0B4J1S3;H3BLT4;O15392-5;O15392-4;O15392-2	Baculoviral IAP repeat-containing protein 5	BIRC5
148153792	170629168	187703200	22305206	263002688	187265824	252192256	168931648	126600776	163894768	203541408	169881760	162053456	201615648	162099392	166342176	180649728	217882240	197600896	181381200	187966704	18580168	1832663	136344688	18259876	164750080	146286512	186336016	169257136	159340720	204530032	222263360	151375760	158046816	180596528	157965824	56	56	56	53025	0	32331	Q9NR09	Q9NR09	Baculoviral IAP repeat-containing protein 6	BIRC6
309091872	383737312	316507296	34805456	448180992	532582336	40328576	321259968	799445632	60062832	575499968	692429888	400743968	416568480	382936032	495382080	318808736	353646656	292837024	376679392	600995456	546701120	721960064	557001792	263768496	210621952	352233728	249983856	263417568	271398176	334302080	193731248	377861152	36611900	396535872	35792512	10	10	10	57706	0	98592	P51451;E9PJX5	P51451;E9PJX5	Tyrosine-protein kinase Blk;Non-specific protein-tyrosine kinase	BLK
548850048	633980224	515332288	67252624	603605440	63009344	680522304	638229568	54920936	629606080	491598528	642518912	721968384	630813376	631650240	640020608	625165120	646896960	603539712	625979968	561064576	575047552	287801408	293984256	380811808	301913440	353676704	301682080	314406784	300039392	18604844	211846256	288389472	326849408	316235008	19789096	16	16	16	159	0	71738	P54132;H0YNU5;H0YLV8	P54132;H0YNU5	Bloom syndrome protein	BLM
2866402304	2199832320	3000052224	2215225856	2887101440	2896578048	2928578048	3863441664	3056137984	3183941376	275382912	3401885184	2931845376	2609181696	2750566144	2011360000	286611360	3151041792	366076128	2188764160	2818643968	3610396672	3083168768	2527825408	2084226304	3836922368	282922848	3675273472	3462224384	3330576384	3542381568	3484112128	3191832576	3448924928	3405462784	3744299264	16	16	16	52562	0	20407	Q13867;K7ES02;K7ESE8;J3KSD8;J3KS79;K7ENH5	Q13867;K7ES02;K7ESE8;J3KSD8	Bleomycin hydrolase	BLMH
695137600	711176320	597834304	535244160	629941568	585103936	731352256	588868544	485249056	658818368	578367808	644599936	567864256	670766784	50276356	503821728	597220480	508130464	468697472	524810240	449122848	511763104	566096192	569496384	285199424	396941568	143757024	323851520	345355616	395108064	344322432	298568480	262310960	374315968	309475712	316158336	9	9	9	50466	0	41222	Q8WV28;Q8WV28-2;Q8WV28-3;Q2MD59	Q8WV28;Q8WV28-2;Q8WV28-3	B-cell linker protein	BLNK
0	72614704	0	0	93819592	0	132662816	92729232	152214736	135746592	70772680	0	82977648	0	0	0	58201984	0	0	0	56101024	76964456	9585557	30169164	189663408	158093936	66501536	264598992	12423199	250411328	225981568	115992280	246398320	16299054	141159904	232580080	3	3	3	17262	1562	59705	P78537;A0A087WSV2;F8W036;F8VP73;F8W099;F8W606;G8JLQ3;P78537-2;H0YHA4;F8VNQ1	P78537;A0A087WSV2;F8W036;F8VP73;F8W099;F8W606;G8JLQ3;P78537-2	Biogenesis of lysosome-related organelles complex 1 subunit 1	BLOC1S1
694863488	766960064	512486240	700693248	49896192	868882880	850923072	1047888960	714939712	743573440	847202432	1010866240	1263093120	846640576	852690560	794318720	1459572224	1364291328	1762334848	1151661056	991969344	1269176320	1496008064	1069957056	899954368	962564928	1349155072	990056064	709668224	876974400	827039296	700562304	888293120	941754048	992183936	76400504	6	6	6	15961	0	16049	Q6QNY1;J3QRU7;Q6QNY1-2;A0A087X1N6	Q6QNY1;J3QRU7;Q6QNY1-2;A0A087X1N6	Biogenesis of lysosome-related organelles complex 1 subunit 2	BLOC1S2
687462784	520811264	612585920	539842944	48132656	828254016	565961216	83294088	859248128	863377280	812293824	88615776	87693176	1361023488	878962688	1133486848	1066167872	1413938560	68606992	803842880	1026371200	917940800	845209664	943203776	10531416	82681456	535513952	94381744	62898752	96701904	1349047168	1126072192	60662960	67610680	1010351936	97214912	5	5	5	21255	0	12718	Q6QNY0;K7EN58	Q6QNY0	Biogenesis of lysosome-related organelles complex 1 subunit 3	BLOC1S3
73777984	613733248	101101584	795041792	657202048	1000621824	32964368	420675776	56699312	341556032	564838656	680596608	2253065	443105152	531627264	697461504	424400992	997424256	772550336	320130880	800763968	357830464	199130704	470012032	222202208	195676496	124768528	197299920	33389622	45158652	250474768	32953406	285076160	377584448	290957696	287991808	4	4	4	23351	0	60444	Q9NUP1	Q9NUP1	Biogenesis of lysosome-related organelles complex 1 subunit 4	BLOC1S4
479419936	408325728	265090576	216901424	928609088	452888160	843281024	395447168	516418848	69921176	881493184	858806912	422474368	398177760	270368064	992611968	618311680	1180826752	444970368	390792000	1009875136	789889216	607627520	194323008	455057760	444355744	540205888	50254364	450708448	433706688	497160992	510838432	366286848	318020768	665020672	42223516	5	5	5	21609	0	1249	Q8TDH9;G5E931;H3BN57;Q8TDH9-2;Q8TDH9-3;A0A0D9SEU2;A0A0A0MTN6	Q8TDH9;G5E931;H3BN57;Q8TDH9-2;Q8TDH9-3	Biogenesis of lysosome-related organelles complex 1 subunit 5	BLOC1S5;BLOC1S5-TXNDC5
0	9632365	11905282	232065824	283462112	23288588	18377276	17829772	9844228	16413657	22784300	30906462	27387056	14523844	16286905	13380654	2548096	27395146	11278055	12872059	6960373	9199097	28188732	45800416	6529596	0	0	6309695	0	0	0	8450445	0	0	0	0	3	3	2	19743	16658	84679	Q9UL45;H3BST1;H3BPR6;H3BRA4;H3BU57;H3BN13;H3BR42;Q9UL45-2	Q9UL45;H3BST1	Biogenesis of lysosome-related organelles complex 1 subunit 6	BLOC1S6
4224271104	4377817088	4574811136	4585188352	4448744960	3676850176	2715950592	3485409280	2181679104	314263008	2958694400	2806093056	376321440	3596014592	2254949632	3895687424	3676057600	2895279872	4634784768	4205516288	3269069312	3086309376	2503893248	2878616832	534854176	586808768	861286912	775351552	419623104	612320832	231825136	763371008	533915872	385699456	723890560	799494656	10	10	10	33428	0	98907	P53004;C9J1E1	P53004	Biliverdin reductase A	BLVRA
3718347520	4790973952	5747890688	4395034	2800448768	4436799488	408406912	3947190272	2962959616	4321161728	4161618688	4847822848	3951571200	4596847104	3909285632	6462722048	3823432960	4817575936	5154811904	5139835392	4220256256	4146679808	4442662400	8081319936	917445376	692869760	1004159936	2433158400	1108601728	985315904	1481919360	63573840	1164328576	1075305728	652647296	1105810176	10	10	10	22119	0	20904	P30043;M0QZL1;M0R192	P30043;M0QZL1;M0R192	Flavin reductase (NADPH)	BLVRB
672902144	699826624	663450560	591998464	28833836	452723232	183410912	9039705	192859696	64639064	0	100509144	49263072	650040576	524271296	534856032	129339344	868906816	79401760	19704236	472033280	0	388022048	270171360	0	0	60297312	83290360	169027760	137123552	84402016	0	0	181232912	0	223808880	3	3	3	20508	0	292	Q96LC9;Q96LC9-2	Q96LC9	Bcl-2-modifying factor	BMF
107038920	84113224	130984032	107082208	97197688	25811336	105889288	44382824	54601864	101023400	85011768	137583616	188885952	90070408	128806472	153871392	159606832	6728829	13417111	57087792	114725216	129473280	14843639	85294488	3195861	31876354	5252323	63885636	36344344	10191379	73505032	24226948	57119832	43915764	63763748	57296428	13	12	12	12917	0	75032	Q9NSY1;H0Y9P1;Q9NSY1-2;Q9NSY1-3;K4DI97	Q9NSY1;H0Y9P1;Q9NSY1-2;Q9NSY1-3	BMP-2-inducible protein kinase	BMP2K
338016000	326034176	497973664	41987576	572978304	495652000	459820192	358255552	410348288	503395872	467719808	597385152	413537408	42474792	388181312	419289056	333687168	589725184	34925340	384605312	766339328	473701728	456741536	385883552	96537736	74354672	0	485005312	51863708	68917568	564184	90684912	73445384	50734168	526692288	38991024	6	6	6	53372	0	17962	P12645	P12645	Bone morphogenetic protein 3	BMP3
0	0	0	0	0	0	0	0	0	0	0	0	0	0	0	0	0	0	0	0	0	0	0	17460792	23094724	0	0	0	0	0	0	0	0	0	0	0	1	1	1	5693	1	-2	O00238;P36894;O00238-2	O00238;P36894;O00238-2	Bone morphogenetic protein receptor type-1B;Bone morphogenetic protein receptor type-1A	BMPR1B;BMPR1A
22802036	31557174	9827192	33352544	14687325	25276756	24561204	18698728	20387300	4711841	21610792	4367993	37491196	1680961	15167723	17013376	2008449	0	18637528	10956372	13111065	6207424	0	18154662	0	7054518	0	0	0	4561709	7263761	0	0	5216835	0	4727525	4	4	4	1152	15647	59983	Q13873;Q13873-2	Q13873;Q13873-2	Bone morphogenetic protein receptor type-2	BMPR2
275566272	266313824	245739568	360672032	345586400	40282436	483365184	301870912	336541728	495553600	522826432	51538656	339438432	327248128	366003392	347452288	448231072	436097536	401832224	463166432	548527040	428151904	609054976	618596032	345716608	373143808	273198752	343304992	487667744	470385152	599122368	52420588	674850880	646879232	534078496	547905472	30	30	30	14581	0	84037	Q14692	Q14692	Ribosome biogenesis protein BMS1 homolog	BMS1
326891808	280452864	241892160	252982976	264209232	427840256	476394624	620972864	428240352	444535520	67578136	402144576	336199584	388779360	257829296	424574912	246077264	25405038	653929216	223740624	383389440	419209760	538136000	1610680960	226716976	388135008	260482080	268741728	49183232	268318144	180144320	397274944	560215808	328299680	484040832	234821712	7	7	7	26132	0	10472	Q12981;Q12981-1;Q12981-2;Q12981-3	Q12981;Q12981-1;Q12981-2	Vesicle transport protein SEC20	BNIP1
75345424	94717640	126020728	126151696	98380656	134206928	134738848	158791216	254512912	0	25101156	0	10743358	19171504	16816328	20796924	8517596	36147720	119859696	94149912	250562896	171711840	90282408	42670040	172802608	178968112	210689184	142404048	222661648	217483520	289402720	198645168	286089856	313365120	174094496	319644480	3	3	3	36017	24617	25599	Q12982;J3KN59;Q12982-2;H7C096	Q12982;J3KN59;Q12982-2;H7C096	BCL2/adenovirus E1B 19 kDa protein-interacting protein 2	BNIP2
81722240	43830456	85354160	22416816	29010078	0	27851924	8462062	0	0	0	0	95910192	52342824	56900032	83637144	0	0	0	0	0	0	0	0	110713728	164091392	160307328	121367680	41940956	0	0	16941266	0	0	0	12585116	3	2	2	21541	27023	23553	Q12983;B4DHJ7	Q12983;B4DHJ7	BCL2/adenovirus E1B 19 kDa protein-interacting protein 3	BNIP3
206668528	84432736	166995904	100483760	66126080	0	2063849	45312332	0	0	1753191	0	189104880	197130512	22707734	262986528	54923060	48553252	11140484	23726488	11240322	36108912	44543728	7702972	50044760	45739628	48969044	130304464	125264	52371808	12311294	16967522	0	16006121	8747587	37631248	5	5	4	2393	16345	7674	O60238;O60238-2;H0YBC7;A0A087WVL5	O60238;O60238-2;H0YBC7;A0A087WVL5	BCL2/adenovirus E1B 19 kDa protein-interacting protein 3-like	BNIP3L
158873456	140012720	13470851	171364848	14735754	135095504	142328384	164356464	149791312	203319472	178345904	211238496	174587648	167319968	138850160	144173024	166716912	13740741	170629952	148344544	100934760	168636720	189561264	121370704	167464144	173410048	16358163	190230464	171322864	245940256	152143472	168484832	228837696	19305748	212699872	168341296	39	39	39	33046	0	25378	Q8NFC6;H0Y9Y2	Q8NFC6	Biorientation of chromosomes in cell division protein 1-like 1	BOD1L1
751094144	658966144	857701632	384637824	112555496	26477320	1066275456	317433408	864630528	1281997312	1140411264	1497982592	642889344	461565376	400904416	402133664	698845248	1500499072	621828672	446588576	608193536	589867840	1082900096	569584448	334472256	317466208	425803392	429690720	345956288	410671488	377545568	1025650880	409807360	290966624	298798304	266337568	2	2	2	14289	16647	84482	Q9Y3E2	Q9Y3E2	BolA-like protein 1	BOLA1
1213632384	1433585920	1453594240	1616266240	1069582208	1180092672	1401086336	1148944768	1450788352	1342345216	1639478272	118848440	1092172800	1239258496	1211993216	1372402688	1229614720	1642237440	167480272	1193276288	1678089728	13296779	1401351936	1205626752	1718056704	194540512	2150312448	2151673600	1582848896	1472740864	1728468096	1849996544	2838406912	1876360064	2125079168	2248260096	4	4	3	10116	0	28174	Q9H3K6;Q9H3K6-2;H3BV85;H3BTW0;A0A0B4J295	Q9H3K6;Q9H3K6-2	BolA-like protein 2	BOLA2
11319199	319260800	176679136	252336960	328910592	33494036	407692800	330883296	290533760	317372544	442507680	341334496	386373760	251229568	196155552	300577696	283228352	167472288	322915808	359934368	90836688	124888504	422063488	209375152	915443648	713382592	914596800	932044992	596298432	344856352	686353408	376999808	130900880	196950528	918525568	601169216	1	1	1	12114	4451	43902	Q53S33	Q53S33	BolA-like protein 3	BOLA3
45975704	479196032	680757504	504501760	510343296	476468800	897881344	609860736	563148288	580878848	587912576	654779968	620304768	524729120	675235968	488077792	623763776	53005312	67438992	501868160	639795712	601475136	6876117	810500736	1370338048	853063296	960662400	1395601408	1338817152	152421728	1435590912	2084904448	1458479616	1314885760	1594580736	1565064064	23	23	23	83629	0	32331	Q14137;Q14137-2;A0A075B729	Q14137;Q14137-2	Ribosome biogenesis protein BOP1	BOP1
129296048	130010136	196974480	131801016	127595344	236493360	189658496	248533744	104016848	283003136	179109472	300368256	66017216	149351584	120590656	156137488	184585824	208758512	145499456	112400168	76128976	81600088	138432688	129753536	263615264	338529568	86413608	247063872	43163288	67959264	134148840	157475072	87194544	47959428	118316016	107116280	3	3	3	30005	0	16799	P07738	P07738	Bisphosphoglycerate mutase	BPGM
122941008	198056832	40530504	119332024	35649396	224386688	79339664	67728600	18134452	1115052	57974144	9284852	28670680	127732000	52426544	57103484	130931304	131495896	144312736	95562960	20983294	35997568	168199184	79865184	6950376	20850112	456331328	59743224	31718936	34854592	23769092	24294296	31648108	0	9118808	0	5	5	5	32542	71808	35504	Q86WA6;Q86WA6-2;Q49AI2;B4DML3;H7C0M3	Q86WA6;Q86WA6-2	Valacyclovir hydrolase	BPHL
399126304	369273408	31307900	384064320	372926592	399628864	345050336	386129408	452284960	433868736	408542016	376074976	413960672	32741532	42863672	351156768	416646368	464673056	420817440	459447296	376692128	363106720	391554688	307477760	451569568	277435008	430926368	453569440	269659232	241126720	219548240	84789768	514824032	236413040	221531408	229829776	1	1	1	53899	0	11819	P17213;H0Y738	P17213;H0Y738	Bactericidal permeability-increasing protein	BPI
0	0	0	0	149732848	0	0	0	40066064	0	0	50714212	70306480	0	0	0	0	30912874	0	0	0	32690804	0	0	53703908	82382688	58703956	581963	81014856	61439152	92418600	82349968	94843432	91388968	105918928	54799328	12	1	1	31707	1	-2	A6NF51	A6NF51		BPNT1
3118908672	3026583808	3590023424	2978745088	3944373248	4417437184	4202181888	3996111872	3611494656	425711200	3640263168	429678176	315113312	38779968	3010715392	3099031296	406485056	3759489792	3188884480	3556635136	3614336512	3404450560	3244935168	4133974528	5510018048	4332783104	4724320768	5422601728	4370656768	4667079168	6199323136	3606562560	4831303168	3178031360	4653826048	5189769728	14	14	3	33392	0	32331	O95861;O95861-4;O95861-2;O95861-3;F8W1J0;F8VVW8;F8VZG4;F8VRY7	O95861;O95861-4;O95861-2;O95861-3;F8W1J0	3(2),5-bisphosphate nucleotidase 1	BPNT1
122993456	141659344	161044624	144743216	179809312	173880624	16104831	149833408	114436832	195126784	160149120	139033088	152718448	161016848	162456992	130866456	154521280	153928560	175037936	172328432	131205544	152539488	19428328	13793685	211830592	230494944	210995040	226518352	158585472	158357520	171774656	186572592	179686960	160711312	153887744	19406608	47	47	47	33826	0	30576	Q12830;Q12830-4;Q12830-2;E7ETD6;F5GXF5;A0A0A0MR81;E9PE19;J3QQK4;J3QQQ8;J3KSK9;J3KSY0;F5H176	Q12830;Q12830-4;Q12830-2;E7ETD6;F5GXF5	Nucleosome-remodeling factor subunit BPTF	BPTF
5767229	0	30088348	4429194	0	0	0	0	0	0	0	0	0	0	0	0	0	0	0	0	0	0	0	0	0	0	0	0	0	0	0	0	25083808	0	0	0	8	1	1	41838	1	-2	H7C560;H7C4S5	H7C560		BRAF
61801896	28350880	53900200	57503800	5808536	96344944	71401136	47808784	1792881	54626240	38868176	60689392	58707280	39535604	32665514	42767372	6668499	44263200	7122817	43856392	31712840	37790860	49140136	37380480	18797412	2257177	26700180	18418604	26571798	45847628	25561064	25553774	21999064	1848946	33687320	18533668	9	4	2	84436	0	94934	P15056;H7C5K3	P15056	Serine/threonine-protein kinase B-raf	BRAF
79113456	94559832	64479156	71222488	112479904	110076984	124541824	105351208	93931840	109723104	83778400	123364016	74662184	87324432	68226936	9177636	101851216	87214896	109098648	54800700	56906052	97255744	96385008	62645196	69495248	113584056	54819696	18936572	56081188	123553640	109833976	124563064	170071040	119273400	124638816	104692720	6	6	6	67304	0	1842	Q7Z569;J3KNN7;Q7Z569-2	Q7Z569;J3KNN7;Q7Z569-2	BRCA1-associated protein	BRAP
464271744	527171680	460922016	393849920	452986016	407752320	280971584	357263904	757677760	433879968	489368352	432551264	37401760	391799328	405809600	358238624	233340832	371820736	342688000	29219314	42468792	464298208	278003488	294405952	590484416	605286848	6269863	689049792	510930464	656919232	888737088	715493824	808355392	907059840	984737600	1031533632	16	16	16	88118	0	32331	Q6PJG6;Q6PJG6-2;Q6PJG6-3	Q6PJG6	BRCA1-associated ATM activator 1	BRAT1
22266344	275763	24455304	32472132	27089352	2059903	18505694	15888873	810015	15426397	12883913	21508698	23526024	28686172	19690592	18129312	13324251	33741656	22727680	187148	21529678	14150436	10814057	15758798	12420876	10254015	11680418	11150175	10673255	108748	11328054	14229477	19620104	10323937	13752295	12235873	8	8	8	20772	0	10223	P38398;P38398-7;P38398-8;P38398-4;Q5YLB2;P38398-6;E7EUM2;P38398-5;P38398-3;B7ZA85;E9PH68;E7EWN5;E7ENB7;E7EQW4;K7EPC7;Q3B891;H0Y8B8;G1UI37;E9PC22;C6YB45;A0A0A0MSN1;P38398-2	P38398;P38398-7;P38398-8;P38398-4;Q5YLB2;P38398-6;E7EUM2;P38398-5;P38398-3	Breast cancer type 1 susceptibility protein	BRCA1
452832992	315908864	44044788	6338824	719491072	439204768	657713472	258733392	502290496	536720576	596571584	615650560	760465984	551075648	502024800	640588608	718867520	587154368	694326016	647557440	584344384	627192512	487033760	347228000	543174144	69726552	549044416	884918784	696529792	687936896	788193600	81244256	813776128	5300557	696473024	673074304	6	6	6	33149	0	32331	P46736-2;P46736-3;P46736;A0A087WZR3;P46736-5;H9KVA9;A0A0D9SF50;A0A0A0MS96;X6RJS7;P46736-4	P46736-2;P46736-3;P46736;A0A087WZR3;P46736-5;H9KVA9;A0A0D9SF50	Lys-63-specific deubiquitinase BRCC36	BRCC3
238148272	257869312	2579479	207618656	290714304	223822128	108826608	144856112	1771648	341843360	154490768	249648336	137768416	172413744	203654672	171314832	185704832	17838898	145737840	188293008	230370992	129927312	157392816	144975664	136831376	78456184	130989080	73759376	64747720	89713184	106422384	107563560	131020256	75665704	152331616	120364680	17	17	17	11952	0	4505	O95696;O95696-2;J3KQ61	O95696;O95696-2;J3KQ61	Bromodomain-containing protein 1	BRD1
885372544	721327744	644090624	818980992	684131712	806635712	674830720	90500784	879574208	698649920	859183104	758461184	1127998720	986233152	933621440	879896000	839553408	763611392	969721408	804371392	669185088	661559488	786773824	910242880	603483712	598993664	557295744	604019072	774680832	74205472	648877376	759729664	725894848	750990272	863388864	599777728	23	21	20	8806	0	23526	P25440;A0A0G2JK44;P25440-2;H0Y6K2;P25440-3;U3KQA6;A0A0G2JHL0;P25440-4;E9PIQ3;H0Y799;A0A0G2JHN8;E9PKQ9;H0YDJ7;U3KPW0	P25440;A0A0G2JK44;P25440-2;H0Y6K2;P25440-3;U3KQA6;A0A0G2JHL0;P25440-4;E9PIQ3	Bromodomain-containing protein 2	BRD2
271451552	221546160	157650208	177604768	301953376	186182448	227298304	243154496	123947944	168481392	213855840	16929098	273676096	284642976	345308832	333310048	243065760	310500800	22097964	263727504	127365592	174111744	194969760	175678208	211870448	211077632	251239424	230392080	135396032	179731712	196513920	193740640	215732320	147143312	85439400	117597544	19	13	13	79541	0	87514	Q15059;Q15059-2;A9J571	Q15059;Q15059-2	Bromodomain-containing protein 3	BRD3
73739392	754712704	855510912	856701696	604039552	670571136	613817472	765300800	509167616	5574873	683380416	662362688	72104096	766351808	830915968	772376896	658154240	598581440	64720000	729951808	45882976	564983552	683180288	613258624	708653760	859181824	733860800	731154752	631272576	912107904	1028401024	677491072	716100928	731041024	675475776	586468672	31	31	25	15222	0	18466	O60885;O60885-2;O60885-3;M0QZD9;M0QYW0;M0R0H4;Q58F21-5	O60885;O60885-2;O60885-3;M0QZD9	Bromodomain-containing protein 4	BRD4
172111504	2626063	240170912	189646720	201234400	211987680	274333824	178982800	110197952	235737440	173055152	243811728	255961664	224520272	260158224	221586880	218669440	233924192	209119680	223190016	224516560	202398368	224122192	204202688	184114656	116543040	139502768	163918464	166831152	207984272	124954224	212189904	111516128	5383445	176044656	111601552	11	11	11	74138	0	81553	Q9NPI1;Q9NPI1-2;I3L4V5	Q9NPI1;Q9NPI1-2	Bromodomain-containing protein 7	BRD7
149955488	15263694	27375612	211582160	220331392	313277696	308589280	310389408	296149856	30631832	286726784	35921408	246254448	209588304	256489584	203526608	212943744	184461712	161530448	209069504	225015600	261572576	242145216	165120976	318396832	26916008	241420992	29759292	253753408	238989632	26759612	251681568	250274896	306829568	233277056	20834454	17	17	16	10284	0	113	Q9H0E9-2;H7C128;H7C179;H7C127;Q9H0E9-4;B5MCW3;Q9H0E9;Q9H0E9-3;H0YAH7;H0YA84;F8WBH2;D6RID0;F8WCS7;C9JV05;H7C2P4	Q9H0E9-2;H7C128;H7C179;H7C127;Q9H0E9-4;B5MCW3;Q9H0E9;Q9H0E9-3	Bromodomain-containing protein 8	BRD8
8643296	106121232	13743246	89317944	119992416	91257160	108637480	93146552	48598928	69627656	79628104	76253440	111671440	103164112	1133944	7295885	91350112	96400696	79523856	116930064	97034416	10716759	105623776	109040496	55496448	52320696	75769416	68031288	59975964	7448283	62631352	4170805	50513928	53705900	35563508	5377729	5	5	5	66999	0	1446	Q9H8M2;Q9H8M2-6;Q9H8M2-3;Q9H8M2-1;Q9H8M2-2;H0YBR9;H0YAW8;H0YBF1	Q9H8M2;Q9H8M2-6;Q9H8M2-3;Q9H8M2-1;Q9H8M2-2	Bromodomain-containing protein 9	BRD9
247957168	211438736	120478624	23840480	255964752	222479712	244623984	206293408	201704736	267418128	153237616	321321280	260076640	225911904	285585568	267537296	261642592	355423328	28400502	284568032	27673484	246128368	274436896	275493216	516987776	294596576	270630912	346668672	334365824	347616160	334284512	352846368	325787904	295822656	290941184	252449776	5	5	5	43551	0	58416	Q9NXR7;Q9NXR7-4;Q9NXR7-3;Q9NXR7-1;F8W733;C9J2G0;A0A075B7D2	Q9NXR7;Q9NXR7-4;Q9NXR7-3;Q9NXR7-1;F8W733	BRCA1-A complex subunit BRE	BRE
57600584	29085488	26672938	12605812	26961504	28929	28305360	24681386	1953235	3312844	12352259	1492281	25084018	30236536	34916876	2283505	39038336	21162968	14789981	30367948	14629908	32479942	28547444	22248992	42818184	48675592	42219916	56696632	44070560	81271176	58107684	41714480	61347044	64674304	43163024	56885464	5	5	5	73839	30184	48601	Q92994;Q92994-7;Q92994-8;Q92994-5;H0YIV6;Q92994-3;B3KWA2;Q92994-9;F8VWY1;F6VUY7;F8VWT8;Q3SYD7;A3KN61;F8VS45;F8VQ19;Q92994-2;Q92994-6;Q92994-4	Q92994;Q92994-7;Q92994-8;Q92994-5;H0YIV6;Q92994-3	Transcription factor IIIB 90 kDa subunit	BRF1
6148681216	6579486720	9225374720	4371628544	5587503616	7758539776	4374380032	3306707968	4849163264	6234283520	8223310336	7017547264	5325142528	8990586880	8529549824	5563324416	7802672640	6094095872	619128192	5995935232	1059727616	5889430016	7641928192	6440764928	6185736192	6446115840	732208832	7862185984	7264608256	6579435520	85207184	1055437184	6087028736	7028256256	877729664	6327305216	5	5	5	27835	0	21486	Q8WY22;REV__Q96PE2	Q8WY22	BRI3-binding protein	BRI3BP
0	11152061	6336592	11558991	9443681	15729524	17559756	9038135	1396449	13734156	13556116	7419508	6963537	13831115	1173769	5482395	4756862	5949608	4957296	4828465	15143765	0	6307088	0	6592168	5904326	6485651	4859825	12803419	16699868	12258548	12192644	13753082	19331664	10075911	19617336	6	6	6	14088	85385	33302	Q9BX63;J3QSE8;Q9BX63-2;J3QKX0	Q9BX63;J3QSE8;Q9BX63-2	Fanconi anemia group J protein	BRIP1
2360083200	1924613888	1456090752	2680640768	3100951808	2716360704	2606120448	3156271104	4031333120	3429810944	3671527680	3126230784	212340208	1275298688	1683516288	2172327680	2168798976	2345409536	2505894656	3051113472	2785818624	2758561792	2787030272	2324253184	1793577600	2218457856	4295532544	3831976192	2957968896	2996558336	2713175552	2796483840	4556165632	2902266112	2904399104	3339237376	19	19	19	41401	0	20975	Q8TDN6	Q8TDN6	Ribosome biogenesis protein BRX1 homolog	BRIX1
193298736	409711808	432479808	13048892	37892792	144853680	67742168	363579584	337877568	410894048	207075056	273983424	400624448	326612096	78828608	437400256	38751828	693705024	709942784	75966096	594235968	374095680	495243584	93357576	405722848	543196928	448064768	393600992	146951232	110727280	490540320	483546240	264824432	561042432	444061888	227736336	4	4	4	87448	0	34829	Q8WUW1;Q8WUW1-2	Q8WUW1;Q8WUW1-2	Protein BRICK1	BRK1
637826240	612582528	809350016	700381440	58493852	615828736	781977536	450153120	580429504	593956224	499194912	837215104	904993344	706024704	657900160	641674816	44799924	636897408	1006618240	896412992	735053504	57281336	532258240	411962976	195259184	185512400	219770528	241399200	661562880	893879488	0	239675312	0	238060800	224297024	234639296	2	2	2	2846	0	52165	Q9HCU9;E9PJF5;H0YCF7;G5E9I4;E9PPD1	Q9HCU9;E9PJF5;H0YCF7;G5E9I4;E9PPD1	Breast cancer metastasis-suppressor 1	BRMS1
0	0	0	0	0	0	0	0	0	0	0	0	0	0	0	0	0	0	0	0	0	0	27449648	32656032	0	0	0	53469056	0	0	0	20699668	0	0	0	22657868	1	1	1	37629	99452	15436	Q5PSV4;H0YHD0;Q5PSV4-2	Q5PSV4;H0YHD0;Q5PSV4-2	Breast cancer metastasis-suppressor 1-like protein	BRMS1L
442388192	406857728	385280928	44868664	368163584	509287104	527779808	551937024	388672256	397159488	403384896	470241248	632146752	538706624	590896832	562377600	581136640	548237504	601507328	634105472	297393824	583172800	561895360	354509888	961045056	949446592	1108135808	933999488	990788992	852263936	811081600	805371904	48907964	666091968	530828512	77863040	12	12	12	46476	0	30925	Q5VW32;Q5VW32-2;F5GXQ0;Q5VW33	Q5VW32;Q5VW32-2;F5GXQ0;Q5VW33	BRO1 domain-containing protein BROX	BROX
23196612	241078656	28787882	494946	48360308	20225338	175764192	265518640	198682048	188870544	270419776	177549632	218434096	169409248	126997480	2126087	36318976	35661748	23235068	188372768	77022752	114718376	37891464	22374616	9989819	15959978	7707639	131139968	92042856	134422144	94555776	128930904	17744712	123420560	127426920	127612904	8	8	7	1375	0	99806	P55201;P55201-3;P55201-2;P55201-4	P55201;P55201-3;P55201-2;P55201-4	Peregrin	BRPF1
14908813	7272057	0	0	11292973	21053798	23302472	14342202	13954459	9979503	6350291	23526564	6772857	7915191	22292066	22252564	11662431	867038	0	5859972	16786464	19022872	1485751	83448	0	0	0	0	0	4695148	6178413	0	0	0	0	3338199	5	4	4	13574	15654	60047	Q9ULD4;E9PI60;Q9ULD4-3;Q9ULD4-2;H0Y7I6;E9PSF3;E9PJ12;H0Y7B4;F6XDC4	Q9ULD4;E9PI60;Q9ULD4-3;Q9ULD4-2	Bromodomain and PHD finger-containing protein 3	BRPF3
4702018	0	0	0	0	0	0	0	0	3280996	0	0	0	0	0	0	2511739	5434593	0	1906754	0	0	984436	0	4370292	522384	0	519006	4289276	4553382	8574284	6302876	6696274	3350858	5549338	5991195	5	4	4	25724	15721	61631	Q9NSI6-2;Q9NSI6;H0Y463;Q9NSI6-3;H0Y5I9;H0Y500;H7BZR9;H0Y4A7;H0Y4R9	Q9NSI6-2;Q9NSI6;H0Y463;Q9NSI6-3;H0Y5I9;H0Y500;H7BZR9	Bromodomain and WD repeat-containing protein 1	BRWD1
152885584	65065800	24641908	61327504	94715784	30998280	44241424	66300236	902763	11339078	33269172	0	60892288	26546942	51587504	23822720	29324156	33894352	57838704	79336072	5082887	37224888	75792208	91057920	9824079	2291033	5286145	56826528	36445088	99864496	23090218	170360384	134938368	8972019	62114600	122693616	3	3	3	44392	0	17151	Q96G97;F8W7Q8;Q96G97-3;J3KQ12;Q96G97-4;H0YF20;H7BYY0;E9PRU2;E9PIU3;H7BXM1	Q96G97;F8W7Q8;Q96G97-3;J3KQ12;Q96G97-4	Seipin	BSCL2
126636496	161916480	179061872	145956064	189718128	172685472	168302880	240548176	145228864	122039288	192402160	180473600	16467216	174673024	199869728	169708544	180926736	165665072	155456864	157787344	97178864	155121312	295471360	218518448	25541828	235660368	295717120	242323008	199439248	222775184	190158912	207948992	433183392	189032576	330497824	207653952	3	3	3	47163	0	14402	Q9NW68;Q9NW68-7;Q9NW68-3;Q9NW68-9;Q9NW68-4;Q9NW68-8;Q9NW68-2;E9PS77;E9PQA7;Q9NW68-5	Q9NW68;Q9NW68-7;Q9NW68-3;Q9NW68-9;Q9NW68-4;Q9NW68-8;Q9NW68-2	BSD domain-containing protein 1	BSDC1
3547347200	3620061696	4250201856	4221449984	3613687296	2729413376	3604971776	1875956480	3818126080	3254061312	3351522560	2676153344	3047589632	3697728512	3551247104	4650277888	1676521728	2210411520	3520495872	2915270400	4515501056	3605532672	2868671488	3862013440	4917587968	5080118784	4368994304	4992686592	4766018048	4854809600	5081446400	5231930880	4496041984	4950678528	4881473024	5310645760	9	9	1	422	0	32331	P35613;P35613-2;A0A087WUV8;P35613-4;A0A087X2B5;I3L192	P35613;P35613-2;A0A087WUV8;P35613-4;A0A087X2B5	Basigin	BSG
0	0	0	0	0	0	0	0	0	34701912	0	61891352	0	0	0	0	0	0	0	0	0	0	0	0	0	0	0	70176488	62598592	62365480	64285608	74103416	68991576	58451684	61984536	72809432	9	1	1	19438	61342	18184	P35613-3;R4GMX5;R4GN83	P35613-3	Basigin	BSG
30621788	147502400	234617904	163315072	148274448	121715440	115408064	31320000	176918960	0	8281917	55679544	102836496	35471664	129522656	152003280	17394238	37209504	123528384	23771012	174652176	28806800	40043016	14425137	0	0	0	0	0	0	0	0	64329344	0	69318680	55890000	3	3	3	44381	71839	35588	Q5W0U4;Q5W0U4-2	Q5W0U4;Q5W0U4-2	B box and SPRY domain-containing protein	BSPRY
226726768	52724424	495704640	29258996	0	602700480	945622144	26005556	293851392	1689412864	946233536	1569249280	1629379072	1398901888	130772120	1530387200	2014322688	2166036992	2664945920	1263581696	1533551360	2333005568	4159833856	869783232	240899104	307946240	223296624	305980672	192622624	314345952	182511888	164151008	163408160	101714048	182490896	16300904	4	4	4	19769	0	99435	Q10589;Q10589-2	Q10589;Q10589-2	Bone marrow stromal antigen 2	BST2
358280608	251176368	27104304	369190784	432880576	354631264	448049248	361285696	328111072	428237568	450894688	480352960	36659016	328297664	379647872	409388448	37315096	449480896	397656928	346247328	49186728	416708800	368060352	309149120	10797241	179610928	159393824	223102528	22415152	188514320	184845120	159229360	232944128	230874496	178421072	170509632	40	40	40	20689	0	25189	O14981;A0A0A0MTH9;O14981-2	O14981;A0A0A0MTH9	TATA-binding protein-associated factor 172	BTAF1
28245820	27648744	33353764	27455888	5818892	28611820	51355212	32351560	7009397	54382560	54027904	112978144	21222676	31977092	18802000	21260328	21394352	24636342	17522282	16769852	35315364	23142448	25574652	23589736	4233709	22288456	29027226	58351668	5492307	0	44214844	27691158	4394589	67467232	81320304	0	3	3	2	52771	19268	2684	Q9H0C5;Q9H0C5-2	Q9H0C5;Q9H0C5-2	BTB/POZ domain-containing protein 1	BTBD1
35594792	57679928	109477496	65138312	52034160	66161376	16817216	32380756	23360148	0	65866740	68072040	18149032	65597632	56910680	35805720	29525960	64871652	45723912	3191692	55509892	42965840	32087226	22578808	35095944	0	31721764	26304044	0	0	0	23582420	0	0	0	0	3	2	2	55931	1	-2	Q9BX70;K7ENV9;A0A087WXN3;Q9BX70-2	Q9BX70;K7ENV9	BTB/POZ domain-containing protein 2	BTBD2
5080014336	5272878080	4000558336	6272143360	6540420608	8108425216	7667601920	9035034624	8680287232	9851768832	1068448128	9368991744	8738556928	8883667968	114985632	1020911168	1398093696	1107536768	1148252800	1250116352	1215019904	1435560448	1369891712	1278258432	8665549824	8636430336	7600524800	684540736	1178237440	1001742400	9176376320	1110138112	1145406976	1240513408	1115774	1117108352	8	6	6	22168	0	32331	P20290;P20290-2;D6RDG3;H0Y9Y1	P20290;P20290-2;D6RDG3	Transcription factor BTF3	BTF3
5333040640	4214374656	3156711424	4442013184	3536823808	5050301440	5919733760	4915472384	3302428928	4358998528	5370811904	5258507264	6261263872	430703072	397873632	4142437376	6658480128	4947812352	6151920640	4851473408	2785664000	5128734720	830625088	6201073664	8742724608	9705922560	8548809728	8051061760	9343550464	9643234304	8623976448	9465640960	8812973056	8748500992	9068445696	8012114944	11	11	9	1727	0	20011	Q96K17;E9PL10;Q96K17-2;Q96K17-3;E9PPC3	Q96K17;E9PL10;Q96K17-2	Transcription factor BTF3 homolog 4;Transcription factor BTF3	BTF3L4
0	0	123260704	0	0	147148672	118013616	110607568	131993168	0	0	0	116986816	119336488	9062293	104910168	93651736	0	77493504	93843320	185308800	133545608	0	133017136	155739424	119979680	102003312	135078992	127787976	141045488	207506896	0	171200464	157830432	0	225934976	2	2	2	19209	0	13116	P62324;F8W0U7	P62324;F8W0U7	Protein BTG1	BTG1
1718177920	1828180736	1887833600	2109366272	2164372480	1856036352	1837276544	2277429248	2091706624	2117627264	221806000	1787999232	1433682176	191580240	1714511232	1774703872	2500403968	1860314624	1976636416	2363799040	200334832	2251325184	2062976000	1829248512	2645584128	2746268928	334860640	278862880	2904845824	2777285120	2562572544	2610270464	2360442624	2329831936	2519951360	218355088	31	31	31	7628	0	32331	Q06187;Q06187-2;U3NG26;Q5JY90	Q06187;Q06187-2;U3NG26;Q5JY90	Tyrosine-protein kinase BTK;Non-specific protein-tyrosine kinase	BTK
0	0	1660256000	0	0	0	0	0	0	0	0	0	0	0	0	0	0	0	0	0	0	0	0	0	0	0	0	0	0	0	0	0	0	0	0	0	2	1	1	58959	0	10557	Q13410;Q4VAN1	Q13410;Q4VAN1	Butyrophilin subfamily 1 member A1	BTN1A1
92509872	86765800	146043104	138233568	17279112	132035248	134367520	15178081	110217280	108216800	184620736	94161680	1040046	90707712	8463145	97017360	172696336	122663176	98962696	12300275	56606428	97198488	37324004	16160316	23166388	96346648	46677880	46605836	86667144	38651456	130535488	169172688	13826762	130580792	12601234	17200706	1	1	1	59632	0	17284	Q7KYR7;Q7KYR7-3;Q7KYR7-5;Q7KYR7-1	Q7KYR7;Q7KYR7-3;Q7KYR7-5;Q7KYR7-1	Butyrophilin subfamily 2 member A1	BTN2A1
178686	18833528	0	0	26605056	18405618	17966222	14106633	11836699	13203637	0	10593739	0	0	0	0	1220228	26822780	0	0	0	0	0	12545007	0	23739760	0	0	23734268	21984516	0	0	0	33359036	0	0	2	1	0	65001	20613	2653	O00478;O00481;O00481-4;O00478-2	O00478;O00481;O00481-4;O00478-2	Butyrophilin subfamily 3 member A3;Butyrophilin subfamily 3 member A1	BTN3A3;BTN3A1
0	0	0	0	22527834	0	30905640	19344792	17373078	5382248	6005245	18274754	0	0	0	13329697	19703666	5753833	15412854	5636579	21167932	20288440	0	18258276	0	0	0	0	7252681	0	0	0	0	11088997	4489004	11109201	7	2	2	68866	37165	20908	Q9Y297;B7Z3H4;Q9Y297-2;Q5T1W7	Q9Y297;B7Z3H4;Q9Y297-2	F-box/WD repeat-containing protein 1A	BTRC
41324824	26514836	26781094	22026404	44775160	49521700	45291288	49518680	69970112	58988456	95238352	9482785	2292786	59985840	1090222	48438268	23403598	84764472	18683614	4587699	33847816	8203844	61229568	1230713	13434824	48186484	37680316	51311848	47268688	80326128	52413752	60578656	26283254	70536024	4777228	82294624	9	9	9	12237	0	15567	O43683;O43683-2;O43683-3;C9JRC7;C9JQA4;C9IYH4	O43683;O43683-2;O43683-3	Mitotic checkpoint serine/threonine-protein kinase BUB1	BUB1
273354176	260952144	187630928	292928352	31375276	332044800	395322208	342404320	304185920	425754400	367522784	400446656	329668000	380823520	266488752	239454320	353733120	384309248	375636992	327435520	272107360	328865536	263934896	236141232	229519088	220681632	188009840	202489856	258980544	33775580	255623968	295515360	257627648	338426496	370617664	326024160	21	21	18	11954	0	15124	O60566;O60566-3;O60566-2;H0YMK5	O60566;O60566-3;O60566-2	Mitotic checkpoint serine/threonine-protein kinase BUB1 beta	BUB1B
6273646080	5914483712	6679109120	6516820992	7157157376	6431753216	7205202944	805089792	572705728	841762752	8397831680	908373184	4646157312	6947828224	6112488960	634244160	5334137856	7212237824	5511456256	5260114432	7723591168	4529172992	57004748	488158624	717132032	5405602816	6264035840	4583252480	6448897536	7501533184	7266787328	7769567232	7267861504	7497965056	871646080	7987644928	14	14	14	37154	0	13677	O43684;J3QT28;O43684-2;J3QSX4	O43684;J3QT28;O43684-2;J3QSX4	Mitotic checkpoint protein BUB3	BUB3
359579936	467670272	455013120	379735648	387399040	529028928	497043200	640671744	486252000	628099776	539466880	604690048	51503204	586466880	47626348	513373664	538428672	49711292	566056704	571300992	310753824	483499232	666128960	375382048	748980480	573003392	80421368	676591360	690951168	757847616	772297664	873706304	697216192	763034432	817664064	590834048	11	11	11	7052	0	12493	Q9BRD0;Q9BRD0-2;H7C462	Q9BRD0;Q9BRD0-2	BUD13 homolog	BUD13
1999503104	741534080	2193921536	3034390016	2344589568	2451501056	2956561408	2398907136	2665438208	2263265280	2405734912	2661811456	2502548736	2393074176	2237242112	2056562304	1935324544	183570736	2916062976	2742085376	2215883008	2141939968	2047806464	2185739008	177166576	2120657920	2244575744	2167487744	2076793216	2436145664	2256339200	2285916672	2471412992	2438031360	271721088	2484377600	6	6	6	17	0	18512	P41223;P41223-2;C9JNV2;F8WCN7;C9JCD9	P41223;P41223-2;C9JNV2	Protein BUD31 homolog	BUD31
826311488	894235200	977405184	761689152	1195464704	1301972096	1649532928	1671440256	1846358528	2286393600	2020845184	2291724032	8332455	1071240704	742022976	848870016	1169770880	1485802624	881721280	1293706240	1596497920	1591652608	2730582016	1967380608	2021952768	2480126976	2248761088	2545194496	2493207040	1865248896	3456081664	2910105344	2795955200	2921324800	2717881856	2443579904	14	14	14	49601	0	13324	Q13895;H7BY94;F8WBL2	Q13895	Bystin	BYSL
104332616	23149556	16103338	113902688	9355601	117183880	159465120	216115456	260031264	233604352	275174016	303467488	241573472	188947776	130503872	129905840	80430928	150741280	206354384	194733312	113524816	126294064	158028560	49006424	273637600	222819840	384940704	29766654	218633552	278638048	189700592	223312768	536593504	336932800	470650112	228308656	8	1	1	24344	1	-2	C9JFN4	C9JFN4		BZW1
4094896384	4991667200	3326678272	5624756736	5333087744	6176226304	6871526912	5898123776	7410496512	7886323200	8361245184	7577336320	5651625472	4841442816	442676224	433778592	5534019584	4264357888	4974827520	5846476288	4735671808	6188580352	592556992	509956608	6062671360	4343389184	5204570624	4841817088	5246202880	610242176	5320328192	4748756992	7960263680	7904223744	7631705088	7833803776	18	17	10	48043	0	28375	Q7L1Q6;Q7L1Q6-4;Q7L1Q6-3;Q7L1Q6-2;C9IZ80;C9J188;C9JWF5;H0Y503;C9JV57	Q7L1Q6;Q7L1Q6-4;Q7L1Q6-3;Q7L1Q6-2;C9IZ80	Basic leucine zipper and W2 domain-containing protein 1	BZW1
0	0	61617864	65836096	7812819	76980888	11809919	191268432	112823016	205404656	152162592	233028512	24043578	0	38776972	0	48646496	0	46201456	51377280	46135376	58973480	61834552	21412144	0	0	0	0	0	0	54828776	0	0	0	0	0	21	2	2	39445	1	-2	B5MCH7	B5MCH7		BZW2
6131554816	5989413888	5416218112	7321479168	6480472064	6838974464	742120128	642759936	7780316160	7586846720	7867778560	6990897152	5808464384	5024355328	4937078272	51051816	7256541696	5833072640	7304823808	8610495488	5310557696	6379525632	7088839168	609373056	4898550784	5114361856	4953737216	4288123648	5053831680	5012100608	4995756032	4584082944	5549800448	6106842112	5267929600	5576509440	25	25	6	48162	0	24642	Q9Y6E2;E7ETZ4;Q75MG1;B5MCE7;E9PFD4;E7EMS9;C9JF98;Q9Y6E2-2;E9PFE3;F8WDX8	Q9Y6E2;E7ETZ4;Q75MG1;B5MCE7;E9PFD4	Basic leucine zipper and W2 domain-containing protein 2	BZW2
66727768	37079900	32464204	90114120	70635456	59228280	7430112	78128112	67924152	44993888	27540704	65110908	7276362	47461068	69411480	29498772	64260608	68067760	68625656	41953004	48664524	57382532	30642986	39696456	6056804	0	0	5680605	5982637	601363	7676307	5702552	11786325	10404588	588383	9423621	6	6	6	13722	0	1423	Q8N655	Q8N655	Uncharacterized protein C10orf12	C10orf12
153908368	151502064	281519488	233545232	158425488	134772384	51619368	144398336	169462704	98271840	122180000	116570824	112305760	180926560	12506795	159601536	94796432	2458412	149796800	110961680	168121808	112087400	85216536	43353440	61341760	120768072	38935288	45447560	46177120	40226096	68367080	102936056	100543760	39111956	84038328	15481102	6	6	6	7871	0	8627	Q5T2E6;Q5T2E6-2;Q5T2E7;Q5T2E8	Q5T2E6;Q5T2E6-2	UPF0668 protein C10orf76	C10orf76
0	0	0	0	0	8333595	0	0	0	0	0	8486771	0	6846536	0	0	5863033	497005	0	0	0	3696938	0	3999721	10576829	9888862	0	0	0	0	0	0	0	0	15719466	0	1	1	1	49248	1	-2	Q9H8K7	Q9H8K7	Uncharacterized protein C10orf88	C10orf88
783952576	988306944	110797288	1035924160	924194560	945659	808541952	877912576	835480640	86361728	907052544	839323648	972340416	809438016	872118528	883042688	8699385	869538048	864012544	853198336	628358208	671826752	770724672	558671936	4411554304	4184022016	4696120320	3628825600	4567503872	4457515520	503337792	5028164096	3588258816	3547873024	3964944128	3649000704	7	7	7	35117	0	20094	Q9H0W9;A0A087WT99;Q9H0W9-2;Q9H0W9-3;Q9H0W9-4;E9PPB5;E9PJU8;E9PQS1;E9PR95;E9PSC3;E9PLC5;E9PLB3;E9PIP1	Q9H0W9;A0A087WT99;Q9H0W9-2;Q9H0W9-3;Q9H0W9-4;E9PPB5;E9PJU8;E9PQS1	Ester hydrolase C11orf54	C11orf54
0	0	0	0	0	15845779	32052762	21566256	0	15803744	17559832	0	0	16146017	0	0	15519976	0	0	0	0	0	372115	19257944	8781815	26210480	100284200	2543555	15682781	47165132	27490816	47408472	46721380	40222444	37386344	1408126	3	3	3	30844	71592	34774	Q6ZUT1-3;Q6ZUT1;Q6ZUT1-2;E9PKA8;E9PQL5;E9PSC8	Q6ZUT1-3;Q6ZUT1;Q6ZUT1-2;E9PKA8	Uncharacterized protein C11orf57	C11orf57
742896128	724687040	970981632	691073984	674480192	546019392	255425264	20749884	287078784	202478720	447947584	530408544	349123264	469417024	513889696	629371776	97131808	294100000	425883264	154093472	110823504	71241576	412391552	324392224	494226880	567710720	353236640	505012992	406809952	510152960	381963488	381199136	389564896	316191840	258295056	486624864	6	6	6	27354	0	12621	Q9H3H3;Q9H3H3-2;Q9H3H3-3	Q9H3H3;Q9H3H3-2;Q9H3H3-3	UPF0696 protein C11orf68	C11orf68
147509712	1440749312	1194873728	1014234688	185941984	124237944	272594656	1170922240	1154319232	0	1321203968	1896812928	1227465984	1018694592	976577536	1224267648	1426979712	1862664576	1158333184	1078238976	126308344	1288009728	1308181504	1064294848	1410488320	127281296	1104339584	1518031616	1449184896	1589463424	1916337280	2415542784	1382932864	1413790592	1503659776	1827811840	2	2	2	21627	0	49559	Q53FT3;E9PJB2;A0A087WYW7;E9PPG8	Q53FT3;E9PJB2;A0A087WYW7;E9PPG8	Protein Hikeshi	C11orf73
69764728	49725688	50009812	57319188	55288516	72258432	83483448	88149048	86657392	132222096	132735552	147393424	88637360	163291648	68742808	77306120	85955048	93999160	51450232	70210880	93162784	85726384	224716528	172894992	45894728	100843080	66094136	77089144	115284808	102271504	222988800	138449504	104239896	173082592	199223696	113530736	6	6	6	41036	0	12132	Q9BUA3;H0YGK9;H0YGY5	Q9BUA3	Uncharacterized protein C11orf84	C11orf84
1231036544	1701742464	2472271616	180134416	3275110656	2824626944	3266322944	493512544	3591705344	863867136	3361516800	865710912	606167552	468947040	1609328256	2051396992	740887360	3090544896	639321600	576089792	202817680	581118976	3248112384	474391744	211418992	1195416832	730535808	403500480	1551027584	1638869760	491679584	480307680	1093671808	580922432	553387968	492717824	7	7	7	14234	0	11581	A0A0B4J220;E9PLD3;E9PRG8	A0A0B4J220;E9PLD3;E9PRG8	Uncharacterized protein C11orf98	C11orf98
0	0	0	0	0	0	0	0	0	0	0	0	0	0	93810016	0	0	0	0	0	0	0	0	0	0	0	0	0	0	0	0	0	0	0	0	0	9	1	1	33819	1	-2	F8VQQ3;H3BPH3	F8VQQ3		C12orf10
1480810240	140823120	1374854784	1108597248	1382461184	2136559872	1493877760	2254400768	1349583232	2371363072	105557616	2218785024	1063545920	1494950656	995933504	124202464	2056211200	1314352896	1293323264	1362895744	1742711424	2088027008	2079567104	2228610048	1230194304	881560960	332198144	784433664	1974695424	157011456	1614733696	1223772160	1979323136	220158848	2214888192	1963209856	10	10	2	42449	0	86579	Q9HB07;F8VR84	Q9HB07;F8VR84	UPF0160 protein MYG1, mitochondrial	C12orf10
7224015872	7964717568	8140441088	7390024704	5354054144	8502832128	3990405120	1068124416	1473941888	1521736192	1398228608	1264669440	1628213504	1037791424	6333258240	6327103488	6847813120	1254592128	8399087104	8558687232	1083020288	1237699712	7999933440	7240926720	7316148736	8057552384	7446461440	7450299392	1032831168	8885739520	1106908288	112062128	9725356032	1193324288	1304483328	6960244736	3	3	3	3749	15708	61251	Q8N999;Q8N999-3	Q8N999;Q8N999-3	Uncharacterized protein C12orf29	C12orf29
204616016	139735616	189939584	104230224	270559008	276260256	291652224	250902288	292238688	240326848	295204736	316278432	182158352	10180441	106829112	232128320	349128832	105549512	280795488	249795184	230240720	364970592	387710912	589364992	495979456	556312704	438493888	5939403	434413	496802848	443104736	563265856	606313280	594347072	454998848	50590616	6	6	6	2817	0	54464	Q96C57;F5H7W8;F5H3K2;E7ENF1;G5EA44;F5H8B7	Q96C57;F5H7W8;F5H3K2;E7ENF1;G5EA44;F5H8B7	Uncharacterized protein C12orf43	C12orf43
108445816	0	0	210735616	183890160	395445504	481432512	524683776	350513280	540783232	717710912	707503552	131853088	102327600	49707664	91834296	333196896	500623232	397037824	334343552	233679360	379527232	714958016	582115328	0	0	31308112	0	217861040	32553380	1941619	327544000	177120944	343864352	338959296	294606880	6	6	6	20123	0	26879	Q8N5I9;A0A087WT30;J3KN91	Q8N5I9;A0A087WT30;J3KN91	Uncharacterized protein C12orf45	C12orf45
9404644	91051136	0	142520560	161473408	94521456	106593664	94965888	25542174	0	82738784	84658416	0	106201360	0	0	0	66764024	0	0	0	0	71072904	0	0	0	0	0	46272260	0	0	0	89051264	58862808	0	0	1	1	1	13178	85727	34435	Q99622;U3KQ85;F5GXW5	Q99622;U3KQ85;F5GXW5	Protein C10	C12orf57
0	0	0	0	0	0	0	0	0	0	0	0	0	0	0	0	0	0	25060952	0	0	0	0	0	0	17592762	21628882	0	16549673	21942342	10820438	12893752	0	0	13709	0	1	1	1	27626	1	-2	Q5U649	Q5U649	Uncharacterized protein C12orf60	C12orf60
3271413248	437917952	4546378240	4968327680	3570394368	2929758464	4038573568	1570676864	3478636032	2951349248	3054271744	3223762176	594827904	5648282112	5051128320	3977026560	3142596608	30206016	4211636992	3457411840	3311422720	2665113088	2475202560	2942520320	143217472	130977976	681205952	93792880	1128647552	974579648	62488368	1007898304	804031616	584752768	654064064	968589184	2	2	2	15864	0	10866	Q9UKR5	Q9UKR5	Probable ergosterol biosynthetic protein 28	C14orf1
73531728	70774840	0	0	59937160	0	60915228	0	57807112	125777600	96726272	0	0	11850078	0	79272040	0	97022672	765409344	82713672	78384992	68807520	15885445	0	473313152	181434480	142009808	707950336	255518448	355272160	662126656	673256320	513735840	60679984	519969984	328897472	2	2	2	10859	0	50035	Q9BXV9	Q9BXV9	Uncharacterized protein C14orf142	C14orf142
158574512	143945264	108811624	74258840	8667377	9719435	56617340	46202416	127663272	69941920	166271440	112380520	172253120	133570352	141778800	130695576	37959160	41504444	99043064	15701424	78991616	162314512	138144336	147875008	348015040	277938048	335628224	339194720	578760832	467454304	425561472	438797984	413848448	456073792	472534400	414920672	7	7	7	66926	0	33508	Q7Z3D6-2;Q7Z3D6;H0YB09;Q7Z3D6-4;Q7Z3D6-3;H0YB62;Q7Z3D6-5;H0YB11;A0A0C4DGD4;A0A0C4DGD8;E5RJ62;E5RIU5	Q7Z3D6-2;Q7Z3D6;H0YB09;Q7Z3D6-4;Q7Z3D6-3;H0YB62;Q7Z3D6-5	UPF0317 protein C14orf159, mitochondrial	C14orf159
2452819456	2126532480	1922544128	2602966784	2468914688	2886459136	2705985024	2946953472	2553762560	337365152	3306982400	3418597632	2957797632	2656831232	245842912	2528995072	3234039296	3220183040	3204985088	274402816	2971560192	3432016640	3987570176	3341624320	4779497472	5303214592	5316103168	4510846976	5017407488	4420173312	3649084672	4466408960	6199236608	6133676544	5252525056	5564060672	15	15	15	28068	0	16795	Q9Y224;G3V4C6;H0YJB9;G3V4E7	Q9Y224;G3V4C6;H0YJB9	UPF0568 protein C14orf166	C14orf166
0	0	11057714	12115835	0	0	0	0	0	0	0	0	0	0	0	0	0	0	0	0	0	0	0	0	41798408	0	0	0	17505988	14530218	16444242	35649568	0	0	0	33387724	1	1	1	36305	1	-2	Q4W4Y0;G3V4G8	Q4W4Y0;G3V4G8	Uncharacterized protein C14orf28	C14orf28
29556774	22726952	28120156	26433196	24326704	32384040	100682224	99632160	56030072	71106776	57643904	75834384	25018408	43513320	72872128	20210756	43071116	0	25344188	29847252	64155576	41254104	23570668	23769208	34356788	31560976	65992516	0	33733524	32891216	56376656	44385756	67935632	66489132	36953424	106202584	7	7	7	47031	0	1092	Q86SX3-6;Q86SX3;Q86SX3-2;Q86SX3-4;Q86SX3-5;Q86SX3-3;C9IYA4;F8VP51;C9K0G6;C9J317;C9J6B2;C9J1F2	Q86SX3-6;Q86SX3;Q86SX3-2;Q86SX3-4;Q86SX3-5;Q86SX3-3	Uncharacterized protein C14orf80	C14orf80
21549188	16797352	0	5254921	14133844	12655288	9811336	25984784	0	15564412	14684804	0	58316352	36585528	32476492	2543229	43105972	4597886	31124792	47878640	0	4083418	83043136	21480902	171505104	421583264	238561472	97260888	135007296	13963913	95491120	84579512	44295696	128658928	182429760	167656928	2	1	1	43881	68778	17552	A0A0A6YYH1;Q7Z6K5-2;Q7Z6K5;H0YMP5;H0YL03;H0YMK0;H0YL85	A0A0A6YYH1;Q7Z6K5-2;Q7Z6K5;H0YMP5;H0YL03;H0YMK0;H0YL85	Arpin	C15orf38-AP3S2;ARPIN
0	0	0	0	0	0	0	0	0	0	0	0	0	0	0	0	0	0	0	0	0	0	0	0	1474673	17908572	0	17004214	4659172	3595709	7362699	6033928	6206193	7185515	24006684	7003855	2	2	2	11067	18003	27848	Q6ZRI6;H3BMJ2;Q6ZRI6-2	Q6ZRI6;H3BMJ2;Q6ZRI6-2	Uncharacterized protein C15orf39	C15orf39
45441968	551739328	453083712	557598016	493565248	616577408	579367232	650440000	571550144	593655680	602063872	683549120	638633536	514329248	365187872	565056896	540720640	46267536	666176000	578418112	522638752	575053888	613738816	497325152	322814592	236563680	327520896	327632416	241248272	497713632	406641536	376963520	439033568	376332544	571888576	208197456	2	2	2	16353	15494	56744	Q8WUR7;H3BQZ5;H0Y996;H3BMR1;Q8WUR7-2;Q8WUR7-3	Q8WUR7;H3BQZ5;H0Y996;H3BMR1;Q8WUR7-2;Q8WUR7-3	UPF0235 protein C15orf40	C15orf40
412489696	414511424	107903072	352284992	404980384	319847360	339436192	232682064	421098432	353091328	40667200	462113088	510187232	474935200	47626088	3514973	49523256	453935584	480812736	372165984	62573824	432814976	402021152	50631016	75478648	47154016	155807280	196411088	6402118	52567584	149210144	201151664	16512801	14696833	135341152	127720272	5	5	5	20656	0	21606	Q9BV29;Q9BV29-2;H0YN78;H0YLN5;H0YM19;H0YLI5;H0YMC0;Q9BV29-3	Q9BV29;Q9BV29-2;H0YN78;H0YLN5	Uncharacterized protein C15orf57	C15orf57
177668160	20858216	540130816	426972576	390152608	425328064	340929632	154905248	432033792	339121120	419042016	13520323	101896688	499482720	342004352	423068832	346266016	191436832	362930080	157039536	287757120	16505351	209842688	223041616	558549952	52764096	579950720	624455168	149769392	155172768	562802880	456545536	172170400	507127712	373318144	273533216	4	4	4	22578	0	12173	Q96S19;A0A087WYU2;Q96S19-3;Q96S19-5;H3BS73;H3BRT2;H3BQ55;H3BNB2;H3BMF3;Q96S19-2;Q96S19-6;Q96S19-4;H3BNT3	Q96S19;A0A087WYU2;Q96S19-3;Q96S19-5;H3BS73;H3BRT2;H3BQ55;H3BNB2;H3BMF3;Q96S19-2;Q96S19-6;Q96S19-4;H3BNT3	UPF0585 protein C16orf13	C16orf13
33797988	35426448	28222312	29393616	26341756	36029108	128148408	141427440	0	127742488	11346752	130918744	38188392	41832928	97121568	31998788	29739328	86821848	96245416	20446320	79494040	39629896	33852280	35131124	125132376	178314032	111892184	124832768	34532524	2386656	73396792	240038800	34556696	46173592	41021352	46699212	2	2	2	14278	85397	33373	Q4TT61;Q9BV90;B8ZZ06	Q4TT61;Q9BV90;B8ZZ06	U11/U12 small nuclear ribonucleoprotein 25 kDa protein	C16orf33;SNRNP25
282198368	206632992	292291296	255197792	152909424	231480400	17009072	236197088	123302160	217582480	228892384	169768112	280294432	149758976	26056228	284320320	205515088	19274816	212390112	249657616	263857200	258451744	791298944	91321776	229058128	17894046	204057680	139319152	62404480	48633048	41010264	114409184	75324616	62581640	94175376	105044760	6	6	6	51017	0	3501	Q96GQ5;H3BSM7;H3BR29;I3L2V0;H3BTA0;H3BS97;Q96GQ5-2	Q96GQ5;H3BSM7;H3BR29	RUS1 family protein C16orf58	C16orf58
254999840	348268096	148753248	2417568	25015024	260660400	372511616	238832560	251519680	187300416	170090208	132171200	253986000	220919136	244329648	25203284	356422688	242064544	315486688	317296512	305244992	237786848	239868112	243437952	236403792	216410624	245299168	308962880	287025472	234178224	291415776	242238112	328682752	284199520	314248672	301893216	18	18	18	10956	0	67441	Q7Z3J2;E7EWW0;F5H7K1;C9J7I2;Q7Z3J2-2;H3BV68;H3BVG8;I3L1U5;H3BRV8;H3BNX2;F6S1J4;H0YFG6;H3BTI5	Q7Z3J2;E7EWW0;F5H7K1;C9J7I2;Q7Z3J2-2;H3BV68;H3BVG8	UPF0505 protein C16orf62	C16orf62
0	0	0	0	0	0	0	0	0	13418609	22591672	0	0	0	0	0	0	23666720	0	0	0	0	0	11567694	0	17617224	0	0	0	0	0	0	0	0	0	0	1	1	1	47524	0	21599	Q9BSU1;H3BSG0;Q9BSU1-2	Q9BSU1;H3BSG0;Q9BSU1-2	UPF0183 protein C16orf70	C16orf70
0	0	0	0	0	0	0	0	0	0	0	0	0	0	0	0	0	0	0	0	0	0	0	0	28109148	24472152	0	0	0	0	0	28407332	1829431	22538368	0	22974748	1	1	1	30925	19302	27166	Q14CZ0;A0A087X1J2	Q14CZ0;A0A087X1J2	UPF0472 protein C16orf72	C16orf72
491649	45356248	409870272	416174688	492461664	245741008	168068848	457085536	206345264	247449152	32964684	182226096	36543768	273963264	308300128	340920320	154961312	369264128	539101568	15938856	62556940	0	56495616	118914464	147781632	69077392	80877072	94429840	86435352	59699488	139839808	1347264	75141216	178128480	158711952	66736948	2	2	2	17799	18041	28324	Q6PH81;Q6PH81-2	Q6PH81;Q6PH81-2	UPF0547 protein C16orf87	C16orf87
610415168	397157504	1247957632	731615488	104069968	925857536	1281143680	798228544	908533248	115726024	398172384	1414459136	768584448	988027904	958503936	1057115712	952903360	1044115456	831037440	484111648	1560392192	1289616640	649086656	999624064	164200384	687787136	549280512	0	0	196656672	0	1112636160	0	613460672	80591880	1012139200	2	2	2	76997	0	26243	H3BP47;Q4G0I0	H3BP47;Q4G0I0	Protein CCSMST1	C16orf91;CCSMST1
0	20172144	0	0	0	0	0	0	0	0	0	0	7418488	0	0	0	14121787	0	771477	18057044	0	0	0	35710348	27590444	27451480	19967072	3260506	2660732	24447560	35971436	2887648	29645292	2545934	21362472	33326644	1	1	1	6311	99237	15311	Q8NEP4	Q8NEP4	Uncharacterized protein C17orf47	C17orf47
1938113	2086348	2470969	2241047	5129813	4292447	5563499	3742049	736679	5506308	0	5112899	3049497	4788323	0	3649733	0	4752107	3379181	295597	3418515	0	4514047	3455085	0	3110246	0	2911534	0	0	29458	410704	2286821	0	4136545	2658339	1	1	1	6977	1	-2	Q8N3J3;Q8N3J3-3;Q8N3J3-4	Q8N3J3;Q8N3J3-3;Q8N3J3-4	Uncharacterized protein C17orf53	C17orf53
176684992	302673632	269425984	233975728	299930048	304025696	343592032	289185280	230399264	455853600	245199072	200794656	361636256	427684960	253680544	31407356	287157440	431124416	233766384	237232784	405196960	426823072	544955776	420919808	333394944	302286336	130275656	380163040	275120384	333263072	539182592	485708352	367690944	2145269	258499392	30065828	8	8	8	37226	0	23043	Q96GS4	Q96GS4	Uncharacterized protein C17orf59	C17orf59
584855872	410465760	616967104	752494464	653418624	649632320	553129024	471108768	502474176	536853984	32673932	475984928	709869184	40093328	439338752	548971200	129586240	151252448	510507520	567698112	295419072	275388256	209980736	585294656	495545984	83810320	418335264	240318288	68246352	477649152	56176240	74638200	21168348	293298880	356466944	156231392	3	3	3	20774	29789	44817	Q9BQA9;J3QRG5;J3KSJ5;Q9BQA9-2;J3QQQ4;J3KTF4;J3QKS6;J3QKZ6;H0Y2X1;J3KTI1;J3KSB6;J3KS78;J3QS53;J3QRZ2;J3QLB7	Q9BQA9;J3QRG5;J3KSJ5;Q9BQA9-2;J3QQQ4;J3KTF4;J3QKS6	Uncharacterized protein C17orf62	C17orf62
174126576	138131728	288109568	312092288	84201456	262615392	85918464	220056864	230918192	182796464	168917856	129147152	208055632	179507824	199695792	260661056	269458112	150715728	361703456	264967168	5247512	262383280	186082544	384471968	1385435904	98577728	371753952	1348864640	321796640	303430176	266856304	587693696	1134054400	336241696	352599904	348409024	12	12	12	44621	0	3584	Q9HAS0;J9JIC5;J3KRR1;K7ERX0;J3QKQ1;K7EIQ2;K7EII1	Q9HAS0;J9JIC5;J3KRR1	Protein Njmu-R1	C17orf75
0	17100640	20351360	34949576	15410935	25277828	22557124	17960140	1676098	12992275	32427088	16495698	3496861	4667596	38598708	9472684	39939588	21425548	25413964	48758040	55505428	71772120	86272408	65065852	51051000	28194364	2673146368	37202424	33971324	23116696	23716748	0	37580608	26532444	39459784	11301435	9	9	9	67314	0	11014	Q9BSJ5;Q9BSJ5-3;I3L072;Q9BSJ5-2;J3KTJ7;J3KT60	Q9BSJ5;Q9BSJ5-3;I3L072;Q9BSJ5-2	Uncharacterized protein C17orf80	C17orf80
382564736	366986144	371500704	45295564	449683744	478419136	37679068	614532096	36652588	508771360	474862080	427954944	509083840	49107948	580716672	481844864	556273344	55792704	551249216	517992256	357764992	371620928	700778368	524362048	354964608	456168736	513782656	389017088	459412512	627764800	521926400	620317056	527042496	45583544	539798144	420090528	20	20	20	70592	0	48334	Q53F19;Q53F19-2;K7ELP6	Q53F19;Q53F19-2	Uncharacterized protein C17orf85	C17orf85
0	191674032	284881536	190783040	0	0	262264224	0	0	170034880	180488800	2222402	198950432	234795872	253047328	245288640	220990016	231216688	0	181432480	344243232	6334408	194434624	43449168	86899960	79934560	89800224	135522704	68597248	110517984	134637328	207137616	144789376	16872620	159842896	12918276	1	1	1	24826	48595	19156	Q32NC0;Q32NC0-2	Q32NC0;Q32NC0-2	UPF0711 protein C18orf21	C18orf21
340389920	301904672	236697632	396704576	428920192	393298304	351807456	425475488	289043840	315608384	436005888	487106656	205570976	208928192	482516064	280362816	226832368	289041408	390235744	28256664	328736096	456829056	234182704	39315776	217295600	210251488	237780992	232409584	421738016	461909312	554713856	59582128	230952288	360777504	365022720	499302912	6	6	6	36977	0	10492	Q96B23-2;Q96B23;Q5BIX2;K7EQH1;A0A087WVF1	Q96B23-2;Q96B23;Q5BIX2;K7EQH1;A0A087WVF1	Uncharacterized protein C18orf25	C18orf25;ARKL1
198502864	232826352	223615008	281030688	306926560	25903752	287300768	301807104	292590720	31331148	324685408	274533728	362335136	365320832	436681408	384296064	373129056	407344928	33902860	366315040	423165728	359238080	357062784	400028608	386083232	386992224	431898944	383073792	488141056	436447296	432741056	391346304	393788256	396940608	381609728	380222528	11	11	11	74974	0	16271	Q96DM3;K7ENL9;A0A087WZD4;K7EIS6	Q96DM3;K7ENL9;A0A087WZD4	Uncharacterized protein C18orf8	C18orf8
0	252580720	311134880	177594352	186468448	0	178276064	11222382	0	169956880	124505264	136281776	170316256	338399648	0	261984560	93132168	452363264	186826288	0	16956644	78686536	180492768	85771112	0	0	0	65893408	0	0	0	0	0	0	0	0	2	2	2	11056	16708	29057	K7EPS8;Q9NSK7-3;Q9NSK7-4;Q9NSK7;F8W6J3;Q9NSK7-2	K7EPS8;Q9NSK7-3;Q9NSK7-4;Q9NSK7;F8W6J3;Q9NSK7-2	Protein C19orf12	C19orf12
588801024	653581952	29708728	416978624	911017024	632027264	144486768	667758464	824767808	571585536	579715520	948132672	1133326080	1034944640	49523020	1015937984	928817536	1648527360	933368256	466988224	2001345664	1413543296	1467333376	131829624	661342784	939119808	35388216	1319258112	831795712	951737856	840368576	1291072896	903728768	1397695872	1704547584	1259544704	5	5	5	12878	0	19126	Q9UFG5;E7EP72;K7EK56;Q9UFG5-2;K7ER12;K7EQW1;A0A087WUU5;K7ELZ1	Q9UFG5;E7EP72;K7EK56;Q9UFG5-2	UPF0449 protein C19orf25	C19orf25
2784071424	4462426112	2802673408	4697892864	3935711232	3415804416	4496446976	4997353984	3752364800	3970569216	4615319040	4470383616	3568546560	434843776	3752811776	3122189568	491030656	3633265664	525385888	4347649024	2618548480	4647518720	3793800448	2172929280	3940538624	3637631488	3528794880	3472628480	4242124800	4550658048	3136550400	4482417664	2964414720	411918112	765808000	2808427264	4	4	4	18419	0	46182	Q9BQ61;K7ELS0;K7ERU7;K7EN60	Q9BQ61;K7ELS0;K7ERU7;K7EN60	Uncharacterized protein C19orf43	C19orf43
368360160	62829384	60146924	47735776	80699328	114684856	36232424	222368416	0	71603344	86507040	29923888	146595264	131683000	122257664	161170480	95330928	62458708	110918968	32163612	165864240	209752032	69042232	45720476	0	18557128	26424926	0	0	4475251	0	9768887	0	0	28368160	11066738	5	1	1	15694	0	24358	J3QS16;J3QKY6;J9JIE4	J3QS16;J3QKY6;J9JIE4		C19orf47
1012346944	1244816128	683127488	929357568	883767360	1100467712	1272841216	1063553856	645219456	1224501248	986927104	856847680	663032192	660473408	951215872	891599744	734886784	905703936	945447808	1077720704	955048768	947876544	1589955712	1311742720	342289248	433003712	401527296	568093312	553736064	560493888	47721260	540407680	687815424	632040128	47329252	597712512	12	12	8	44746	0	6759	Q8N9M1;Q8N9M1-2;Q8N9M1-3;J3QKZ5;J3QS80	Q8N9M1;Q8N9M1-2;Q8N9M1-3	Uncharacterized protein C19orf47	C19orf47
486425216	397431648	543373120	417425056	509275360	37321984	407878080	435718944	411078944	492291584	477104384	566353920	29056900	409245408	357135360	415166048	315557344	432311328	379271680	270467904	580662208	434569280	516499488	53578572	41813072	387715712	228365008	669155712	49520064	279629856	132280448	699602880	525523840	450640896	533345088	559852224	6	6	6	29233	0	29286	Q9BSF4	Q9BSF4	Uncharacterized protein C19orf52	C19orf52
1959371648	218489216	201774720	980371712	2195715072	1548023936	1549494656	2090944000	1700763904	1211056384	1541644288	958387968	1412907392	1072625152	682438464	954963584	1403607680	66425144	924563712	2948395264	356034016	813832064	1027014592	541767936	1927718784	2396474624	2027645056	1726195456	1996517632	2822515712	1724818816	1845266688	1830013952	1772768000	2267731712	1992475776	5	5	5	10576	20599	26453	Q9UNZ5;K7EIU1;K7EN09;K7ESE5;A0A0A0MQS3	Q9UNZ5	Leydig cell tumor 10 kDa protein homolog	C19orf53
53581876	53463128	0	0	97413160	30943964	101704032	71713512	31955844	123282616	109331496	162644736	109477232	64969492	98391056	41953132	120749640	135418352	59596464	136827248	61974720	62503304	57743176	58137204	6093802	29645138	31160702	31683668	35118584	35582240	4773262	30991092	37867536	27275800	15637035	0	3	3	3	37778	2994	46272	Q5BKX5;Q5BKX5-3;Q6ZWG5	Q5BKX5;Q5BKX5-3	UPF0692 protein C19orf54	C19orf54
0	0	0	0	0	0	0	0	0	0	0	0	0	0	0	0	0	0	0	0	0	0	0	0	63057552	33239004	61350564	56488796	0	76178008	83112192	808987	7982721	73500992	53960008	77699224	2	2	2	20067	16718	2913	Q96EN9-3;Q96EN9;M0R0T3;Q96EN9-2	Q96EN9-3;Q96EN9;M0R0T3;Q96EN9-2	Uncharacterized protein C19orf60	C19orf60
0	0	0	0	132282112	161255056	181941232	0	215440192	29375344	233633792	291722720	379666	293105792	38445588	2966939	0	325436832	0	45479792	251410160	296630304	367033376	471893952	64369176	244739232	239940640	102411888	204055664	189923120	116644088	9759802	309763424	223679952	44616820	0	5	5	5	3311	0	13622	Q9NUL5;Q9NUL5-4;Q9NUL5-3;Q9NUL5-2;K7EML3;K7EMS9	Q9NUL5;Q9NUL5-4;Q9NUL5-3;Q9NUL5-2	UPF0515 protein C19orf66	C19orf66
445875808	546229632	333983392	465633248	433214624	630444992	745909376	539550400	640119104	562608064	953555008	755969664	625847872	638038912	617260160	38615360	683464384	764696064	980329088	828667712	503147104	656908352	1315425024	904960576	1228561792	1078752512	118859672	1291883904	1460321920	1772486912	1205879424	1309075584	182473472	1426977280	1859375104	1272722304	3	3	3	16019	3003	47424	Q13901;J3KPZ4	Q13901;J3KPZ4	Nuclear nucleic acid-binding protein C1D	C1D
86797632	0	115443320	0	0	17294256	26101712	146619	204968720	71992392	182817456	92597688	83535760	92928192	78992248	72861704	86922992	54699000	88009680	154747136	49723144	75020344	16593123	19045092	29851388	45027128	0	23352196	0	29800936	0	0	5303381	0	0	61418116	4	4	4	36382	98689	31395	Q96EU7	Q96EU7	C1GALT1-specific chaperone 1	C1GALT1C1
[truncated: 7,365 more rows]
