# Supplementary material for: Proteomic-Based Analysis of Hypoxia- and Physioxia-Responsive Proteins and Pathways in Diffuse Large B-Cell Lymphoma
Source: Cells. 2021 Aug 8;10(8):2025. doi: 10.3390/cells10082025 (PMC8392495; doi:10.3390/cells10082025)
Supplement: Supplementary file 1 [file cells-10-02025-s001.zip › S2. DAPs identified in each cell line.xlsx]

## Sheet: Ri-1 up-regulated 1%
Column1	Column2	Column3	Column4	Column5	Column6	Column7	Column8	Column9	Column10	Column11	Column12	Column13	Column14	Column15	Column16	Column17	Column18	Column19	Column20	Column21	Column22	Column23	Column23A	Column24	Column25	Column26	Column27	Column28	Column29	Column30
Ri-1 1%.1	Ri-1 1%.2	Ri-1 1%.3	Ri-1 1%.4	Ri-1 21%.1	Ri-1 21%.2	Ri-1 21%.3	Ri-1 21%.4	x>=1.5	x<=0.66	Student's T-test Significant 1%_21%	Student's T-test significant	Student's T-test Significant 1%_21%_x>=1.5	Student's T-test Significant 1%_21%_x<=0.66	Peptides	Razor + unique peptides	Unique peptides	Mol. weight [kDa]	Q-value	Score	1%	21%	1%_x/y_21%	fold-change	-Log Student's T-test p-value 1%_21%	Student's T-test Difference 1%_21%	Student's T-test Test statistic 1%_21%	Protein IDs	Majority protein IDs	Protein names	Gene names
1.03305745124817	0.165786907076836	0.847450375556946	0.780036270618439	0.280923962593079	-1.9598183631897	-0.556889295578003	-0.590547382831573	Keep	Discard	+	1%_21%	+_Keep	+_Discard	7	7	7	45096	0	63121	367848108	125444272	2.93236	2,93236255645752	1,51980540799577	1,41316552087665	2,82354354341608	Q8N2K0;Q8N2K0-3;Q8N2K0-2;I3L294;Q5T712;I3L440;I3L380;I3L1V0	Q8N2K0;Q8N2K0-3;Q8N2K0-2	Monoacylglycerol lipase ABHD12	ABHD12
0.602165400981903	0.531566441059113	0.833744168281555	0.926947414875031	0.0555339120328426	0.139210253953934	-1.60173010826111	-1.48743748664856	Keep	Discard	+	1%_21%	+_Keep	+_Discard	11	11	11	11883	0	13415	87924920	19811677,75	4,4380350112915	4,4380350112915	1,6140673227697	1,44721171353012	2,99006188579737	Q6JQN1;Q6JQN1-5;F8W1I9;Q6JQN1-2;Q6JQN1-3;Q6JQN1-4;D6RFF6;F8W179;F8W0Q4	Q6JQN1;Q6JQN1-5;F8W1I9;Q6JQN1-2	Acyl-CoA dehydrogenase family member 10	ACAD10
1.28568768501282	0.724156379699707	0.92896556854248	0.664246678352356	-0.978444218635559	-0.832195699214935	-1.25823223590851	-0.534184157848358	Keep	Discard	+	1%_21%	+_Keep	+_Discard	9	9	9	68124	0	11784	565158368	195146400	2,89607381820679	2,89607381820679	3,90809712737622	1,80152815580368	8,74734028639769	Q96CM8;E9PF16;Q96CM8-3;Q96CM8-2;Q96CM8-4;D6RF87	Q96CM8;E9PF16;Q96CM8-3;Q96CM8-2;Q96CM8-4	Acyl-CoA synthetase family member 2, mitochondrial	ACSF2
0.833735764026642	0.71764075756073	1.19012796878815	0.799386382102966	-1.47077977657318	-0.504506349563599	-0.996313750743866	-0.569291055202484	Keep	Discard	+	1%_21%	+_Keep	+_Discard	21	21	14	64129	0	19884	3889456512	2054255904	1,8933652639389	1,8933652639389	3,43082173203644	1,7704454511404	7,17300099381994	Q4G176;F5H5A1;F5H755;F5H362;F5H2G6;H0YGC7;F5GX20;H0YH37	Q4G176;F5H5A1;F5H755;F5H362	Acyl-CoA synthetase family member 3, mitochondrial	ACSF3
0.813594102859497	0.890753984451294	1.67631578445435	-0.243614003062248	-1.09520184993744	-0.748593389987946	-0.845532774925232	-0.447721779346466	Keep	Discard	+	1%_21%	+_Keep	+_Discard	17	2	2	14522	0	24844	1116640640	586008720	1,90550184249878	1,90550184249878	2,03100565251324	1,56852491572499	3,76796483793627	K7EM38	K7EM38		ACTG1
0.190038725733757	1.14459002017975	0.319918602705002	1.60726118087769	-1.22228181362152	-0.921438097953796	-0.565384566783905	-0.552704036235809	Keep	Discard	+	1%_21%	+_Keep	+_Discard	7	7	7	39506	0	29134	299474784	185389964	1,61537754535675	1,61537754535675	2,32067472597925	1,63090426102281	4,35838262819149	P54922;C9JZW7	P54922;C9JZW7	[Protein ADP-ribosylarginine] hydrolase	ADPRH
-0.340131878852844	1.22909963130951	1.05035173892975	0.961135149002075	0.21455392241478	-1.24347519874573	-0.974638879299164	-0.896894574165344	Keep	Discard	+	1%_21%	+_Keep	+_Discard	11	11	11	4338	0	13408	530885112	319572392	1,66123592853546	1,66123592853546	1,62280573442059	1,45022734254599	3,00564916861032	Q9NRZ7;Q9NRZ7-2;Q9NRZ7-3;C9JL26;C9J184	Q9NRZ7;Q9NRZ7-2;Q9NRZ7-3;C9JL26	1-acyl-sn-glycerol-3-phosphate acyltransferase gamma	AGPAT3
0.94316554069519	0.962449610233307	1.06405305862427	0.642815709114075	-1.41677367687225	-0.801375985145569	-0.60450154542923	-0.789832592010498	Keep	Discard	+	1%_21%	+_Keep	+_Discard	11	11	11	25268	0	1597	3402442368	746374288	4,55862760543823	4,55862760543823	3,99904429803363	1,8062419295311	9,07880536559691	P27144;D3DQ64	P27144;D3DQ64	Adenylate kinase 4, mitochondrial	AK4
1.84137535095215	0.193880453705788	1.02749037742615	-0.323773115873337	-0.298045635223389	-0.341669291257858	-1.01668918132782	-1.08256900310516	Keep	Discard	+	1%_21%	+_Keep	+_Discard	26	26	26	19148	0	32331	12905780,5	8553579,5	1,50881624221802	1,50881624221802	1,40938813158854	1,36948654428124	2,63191983117806	Q02952;Q02952-3;Q02952-2	Q02952;Q02952-3;Q02952-2	A-kinase anchor protein 12	AKAP12
0.758661568164825	0.629129528999329	0.812650680541992	0.701534390449524	-0.256249725818634	-0.100638680160046	-0.388929426670074	-2.15615844726563	Keep	Discard	+	1%_21%	+_Keep	+_Discard	15	15	15	57839	0	13661	1118796368	298363124	3,74978089332581	3,74978089332581	1,62502067271083	1,45098811201751	3,00960433170749	Q02252;Q02252-2;G3V4Z4	Q02252;Q02252-2;G3V4Z4	Methylmalonate-semialdehyde dehydrogenase [acylating], mitochondrial	ALDH6A1
1.14705061912537	0.688362538814545	0.517121970653534	0.814536154270172	-0.0689723268151283	-1.80579340457916	-0.945212841033936	-0.347092658281326	Keep	Discard	+	1%_21%	+_Keep	+_Discard	20	20	20	55366	0	20937	178880876	48487347	3,68922805786133	3,68922805786133	2,09459573884487	1,58353562839329	3,89364920389296	P49419-2;P49419;P49419-4;F8VS02;P49419-3;F8VVF2;H0YHM6	P49419-2;P49419;P49419-4;F8VS02;P49419-3	Alpha-aminoadipic semialdehyde dehydrogenase	ALDH7A1
0.87685489654541	0.41209876537323	1.52231025695801	0.61167573928833	-0.514878809452057	-1.30865859985352	-1.03739154338837	-0.562010645866394	Keep	Discard	+	1%_21%	+_Keep	+_Discard	8	8	4	5818	0	36263	480049032	218934700	2,19265842437744	2,19265842437744	2,83919940942265	1,71146981418133	5,54850250868713	Q9Y672;A2A2G4	Q9Y672;A2A2G4	Dolichyl pyrophosphate Man9GlcNAc2 alpha-1,3-glucosyltransferase	ALG6
1.21661221981049	1.03882467746735	1.20932221412659	-0.339055061340332	-0.440766781568527	-1.29824984073639	-0.588224828243256	-0.798462688922882	Keep	Discard	+	1%_21%	+_Keep	+_Discard	11	11	10	88811	0	37346	149452598	65176993	2,2930269241333	2,2930269241333	2,00783034044747	1,56285204738379	3,72267116889698	Q01432;Q01432-5;Q01432-4;E9PKC5;Q01432-6;Q01432-3;E9PIR5;E9PLK6;Q01432-2;P23109;H0YDC3;E9PPG2	Q01432;Q01432-5;Q01432-4;E9PKC5;Q01432-6;Q01432-3	AMP deaminase 3	AMPD3
0.574290573596954	0.583858609199524	1.00954782962799	1.13248884677887	-1.21852374076843	0.0263033378869295	-1.45418930053711	-0.653776109218597	Keep	Discard	+	1%_21%	+_Keep	+_Discard	20	20	18	1076	0	99124	1039079680	481795888	2,1566801071167	2,1566801071167	2,42578918173383	1,65009291796014	4,58479031799077	Q8N8A2;Q8N8A2-2;Q8N8A2-4;H7C209;Q8N8A2-3;H7C4A0;Q8N8A2-5;H7C3P1;C9JY51;F8WBW3	Q8N8A2;Q8N8A2-2;Q8N8A2-4;H7C209;Q8N8A2-3	Serine/threonine-protein phosphatase 6 regulatory ankyrin repeat subunit B	ANKRD44
-0.752952098846436	1.22613978385925	1.0531097650528	1.33212065696716	-0.741203904151917	-0.705227315425873	-0.670806229114532	-0.741180777549744	Keep	Discard	+	1%_21%	+_Keep	+_Discard	8	5	5	28787	0	1751	6706823344	1064629296	6,29967927932739	6,29967927932739	1,56325054268312	1,42920908331871	2,89993165657208	Q92688;Q92688-2	Q92688;Q92688-2	Acidic leucine-rich nuclear phosphoprotein 32 family member B	ANP32B
1.00550985336304	0.803905725479126	0.847328662872314	1.01126110553741	-0.941575765609741	-0.700538158416748	-0.719147980213165	-1.30674338340759	Keep	Discard	+	1%_21%	+_Keep	+_Discard	26	18	18	10396	0	19119	610091424	361384240	1,68820691108704	1,68820691108704	4,72613055835564	1,83400265872478	12,1622468924714	O94973;O94973-2;A0A0G2JS82;O94973-3;A0A0G2JQM1;E9PR62;A0A0G2JRF9;A0A0G2JQA4;A0A0G2JRS3;A0A0G2JQT9;H0YEG0;E9PNC4;A0A0G2JS17;H0YDE9;E9PQP4	O94973;O94973-2;A0A0G2JS82;O94973-3;A0A0G2JQM1	AP-2 complex subunit alpha-2	AP2A2
0.905686914920807	1.03537237644196	1.08313536643982	0.010808726772666	-0.675646126270294	-1.80384182929993	-0.0909496322274208	-0.464565634727478	Keep	Discard	+	1%_21%	+_Keep	+_Discard	7	7	7	83259	15547	58043	197311737	15300320,5	12,8959226608276	12,8959226608276	1,83726636148888	1,51750165177509	3,39721862259419	Q9Y6B7;B1ALD0;B1ALD2;Q9Y6B7-2;B1ALD3;B1ALD1	Q9Y6B7;B1ALD0	AP-4 complex subunit beta-1;AP complex subunit beta	AP4B1
1.0557906627655	0.619443595409393	1.22210562229156	0.383702635765076	0.0597922839224339	-1.11619579792023	-1.37389969825745	-0.850739419460297	Keep	Discard	+	1%_21%	+_Keep	+_Discard	24	24	24	16219	0	2438	216959888	138343084	1,56827414035797	1,56827414035797	2,37222310122601	1,64052128698677	4,46854820320414	Q96P48;Q96P48-3;Q96P48-1;Q96P48-4;E7EU13;Q96P48-2;Q96P48-7;A0A0A0MSJ2;Q96P48-5;F5GWN4;F8WBT0;F5GWQ2;H0YGD1	Q96P48;Q96P48-3;Q96P48-1;Q96P48-4;E7EU13;Q96P48-2;Q96P48-7;A0A0A0MSJ2;Q96P48-5	Arf-GAP with Rho-GAP domain, ANK repeat and PH domain-containing protein 1	ARAP1
0.453575879335403	0.614794790744781	1.19223606586456	0.955947577953339	-1.05049443244934	-0.483080804347992	-1.65632653236389	-0.0266525000333786	Keep	Discard	+	1%_21%	+_Keep	+_Discard	25	25	25	10502	0	32331	640702720	380224880	1,68506252765656	1,68506252765656	2,20738739251607	1,60827714577317	4,12188070981772	P98171;P98171-2;E7EQN5;E9PCM6;A0A0B4J1X7;S4R314;S4R352;C9JLA8;C9J5M2;F8WAR0;H7C2Z8;H7C3K8;H7C3G3;H7C120	P98171;P98171-2;E7EQN5;E9PCM6;A0A0B4J1X7	Rho GTPase-activating protein 4	ARHGAP4
0.837308287620544	0.743228673934937	0.746786415576935	0.392871677875519	-2.00178933143616	-0.787029564380646	-0.415997803211212	0.484621524810791	Keep	Discard	+	1%_21%	+_Keep	+_Discard	3	3	3	29337	15576	58711	210171272	75139308,25	2,79708790779114	2,79708790779114	1,38701765840047	1,36009755730629	2,59349831435609	Q8N8R7;E9PRK7	Q8N8R7;E9PRK7	ARL14 effector protein	ARL14EP
0.763951897621155	0.903482377529144	0.553941667079926	0.718287646770477	-1.23989260196686	0.663442373275757	-1.24255895614624	-1.12065446376801	Keep	Discard	+	1%_21%	+_Keep	+_Discard	16	16	16	77959	0	50504	641767336	183201967	3,50305938720703	3,50305938720703	1,68129940321541	1,46983180940151	3,11068899291028	O95352;O95352-3;O95352-2;C9JFF4;C9J415;H7C2R3;H7BZ92;C9JE55;H7C2J8;C9JGL2;F8WDY9;C9JNU2;C9JKA3;H7C059;H7C369	O95352;O95352-3;O95352-2	Ubiquitin-like modifier-activating enzyme ATG7	ATG7
0.614297032356262	1.43885087966919	0.224260404706001	1.06197547912598	-1.02025508880615	-0.714644491672516	-0.284825205802917	-1.31965899467468	Keep	Discard	+	1%_21%	+_Keep	+_Discard	5	5	5	24866	16207	73097	341920784	206433988	1,65632009506226	1,65632009506226	2,54338095503864	1,66969189420342	4,84654963648505	Q99766;Q8WXQ4;Q99766-3;Q99766-2	Q99766	ATP synthase subunit s, mitochondrial	ATP5S
0.95397025346756	0.970373690128326	0.767734706401825	0.138648554682732	0.571870684623718	-1.60954999923706	-0.981605708599091	-0.811442196369171	Keep	Discard	+	1%_21%	+_Keep	+_Discard	8	8	8	34258	0	32889	555855136	256667702	2,16566061973572	2,16566061973572	1,525659914151	1,41536360606551	2,83380282300407	P25311;C9JEV0;H7BZJ8	P25311;C9JEV0	Zinc-alpha-2-glycoprotein	AZGP1
1.13200068473816	0.875473141670227	0.979982793331146	0.713536441326141	-0.88854855298996	-0.972202479839325	-0.754774212837219	-1.08546781539917	Keep	Discard	+	1%_21%	+_Keep	+_Discard	5	5	2	13714	0	68477	7082702592	1200556848	5,89951515197754	5,89951515197754	5,4971581378773	1,85049653053284	16,4787141568082	P61769;H0YL18;F5H6I0	P61769;H0YL18;F5H6I0	Beta-2-microglobulin;Beta-2-microglobulin form pI 5.3;Beta-2-microglobulin	B2M
1.08954977989197	1.00321853160858	1.13673853874207	-0.402988195419312	-0.744366943836212	-0.135927230119705	-1.63847172260284	-0.307752788066864	Keep	Discard	+	1%_21%	+_Keep	+_Discard	5	5	5	20532	0	38311	3413989988	165010663,25	20,6895122528076	20,6895122528076	1,5200546695989	1,41325933486223	2,82398012805195	Q9BXH1;Q9BXH1-2	Q9BXH1	Bcl-2-binding component 3	BBC3
0.908963859081268	0.269110649824142	1.18560612201691	1.0994633436203	-0.976895451545715	-0.796421945095062	-1.32994556427002	-0.359881043434143	Keep	Discard	+	1%_21%	+_Keep	+_Discard	9	9	9	44287	0	10937	1348169888	881589328	1,52924931049347	1,52924931049347	3,01128051335253	1,73157199472189	5,98841950326207	O15382;M0QZ10;M0QXF9;B3KSI3;M0QZP4;O15382-2;M0R2K7	O15382;M0QZ10;M0QXF9;B3KSI3;M0QZP4;O15382-2	Branched-chain-amino-acid aminotransferase, mitochondrial;Branched-chain-amino-acid aminotransferase	BCAT2
0.777308940887451	1.05667459964752	0.127213016152382	0.759853780269623	-0.343957364559174	-1.97786164283752	0.336915969848633	-0.736147224903107	Keep	Discard	+	1%_21%	+_Keep	+_Discard	5	5	5	32542	71808	35504	120215092	21627125	5,55853319168091	5,55853319168091	1,3880268220343	1,36052514985204	2,59522887046091	Q86WA6;Q86WA6-2;Q49AI2;B4DML3;H7C0M3	Q86WA6;Q86WA6-2	Valacyclovir hydrolase	BPHL
1.33405983448029	0.827825605869293	0.763672888278961	0.208393663167953	-1.17309391498566	-0.781674742698669	0.193339869379997	-1.372523188591	Keep	Discard	+	1%_21%	+_Keep	+_Discard	5	5	5	73839	30184	48601	31491205,5	4777654,75	6,5913519859314	6,5913519859314	2,02463287936375	1,56697599217296	3,7554831299016	Q92994;Q92994-7;Q92994-8;Q92994-5;H0YIV6;Q92994-3;B3KWA2;Q92994-9;F8VWY1;F6VUY7;F8VWT8;Q3SYD7;A3KN61;F8VS45;F8VQ19;Q92994-2;Q92994-6;Q92994-4	Q92994;Q92994-7;Q92994-8;Q92994-5;H0YIV6;Q92994-3	Transcription factor IIIB 90 kDa subunit	BRF1
0.658299326896667	0.606566488742828	0.713254988193512	0.691669464111328	-1.44224047660828	-1.1042867898941	0.91419529914856	-1.03745830059052	Keep	Discard	+	1%_21%	+_Keep	+_Discard	14	14	14	37154	0	13677	6346014976	2680168336	2,3677670955658	2,3677670955658	1,32912127557416	1,33489513397217	2,49461914882658	O43684;J3QT28;O43684-2;J3QSX4	O43684;J3QT28;O43684-2;J3QSX4	Mitotic checkpoint protein BUB3	BUB3
0.688212156295776	0.64146625995636	1.19255995750427	0.552006363868713	-1.10276138782501	-1.76038610935211	-0.264690279960632	0.0535930097103119	Keep	Discard	+	1%_21%	+_Keep	+_Discard	6	6	6	27354	0	12621	782409696	366978408	2,1320321559906	2,1320321559906	1,90805427650993	1,53712237626314	3,53065394017689	Q9H3H3;Q9H3H3-2;Q9H3H3-3	Q9H3H3;Q9H3H3-2;Q9H3H3-3	UPF0696 protein C11orf68	C11orf68
0.866935729980469	0.974528670310974	0.998582303524017	0.891980290412903	-0.885071039199829	-0.849896967411041	-0.943198502063751	-1.0538604259491	Keep	Discard	+	1%_21%	+_Keep	+_Discard	3	3	3	3749	15708	61251	7679799808	1414644032	5,428786277771	5,428786277771	7,37115636391451	1,86601348221302	34,0745886381007	Q8N999;Q8N999-3	Q8N999;Q8N999-3	Uncharacterized protein C12orf29	C12orf29
0.813479423522949	0.680717527866364	0.848358273506165	1.02887666225433	-1.70505583286285	-0.835235357284546	-0.686074495315552	-0.145066156983376	Keep	Discard	+	1%_21%	+_Keep	+_Discard	10	5	3	62608	0	34734	336083640	88991266	3,77659153938293	3,77659153938293	2,64865224497929	1,68571593239903	5,08894446246709	Q13555;Q13555-5;Q5SWX3;Q13555-9;Q13555-2;A0A0A0MS52;A0A0A0MT11;Q13555-10;Q13555-3;Q13555-4;Q13555-7;Q13555-8;Q13555-6;Q8WU40;H0Y6G2;H7C394	Q13555;Q13555-5;Q5SWX3;Q13555-9;Q13555-2;A0A0A0MS52;A0A0A0MT11;Q13555-10;Q13555-3;Q13555-4;Q13555-7;Q13555-8;Q13555-6;Q8WU40;H0Y6G2	Calcium/calmodulin-dependent protein kinase type II subunit gamma	CAMK2G
0.732465267181396	0.740424811840057	0.866327941417694	0.602455317974091	-2.10520720481873	-0.470208495855331	-0.385271191596985	0.0190137233585119	Keep	Discard	+	1%_21%	+_Keep	+_Discard	13	13	13	13475	0	11087	92978136	28090768,25	3,30991792678833	3,30991792678833	1,68437940020117	1,47083662683144	3,11625457628584	Q9P1Y5;Q9P1Y5-2	Q9P1Y5;Q9P1Y5-2	Calmodulin-regulated spectrin-associated protein 3	CAMSAP3
0.172845408320427	0.729921698570251	1.64487051963806	0.478882551193237	0.173998981714249	-1.25928354263306	-1.00334703922272	-0.937888562679291	Keep	Discard	+	1%_21%	+_Keep	+_Discard	3	1	1	57743	1	-2	379310800	195365540	1,94154405593872	1,94154405593872	1,82250967738208	1,5132600851357	3,36968004349522	K7ES78	K7ES78		CAPNS1
1.03312599658966	0.755343973636627	1.06913709640503	0.611097276210785	-0.307443171739578	-0.525741696357727	-1.28856337070465	-1.34695613384247	Keep	Discard	+	1%_21%	+_Keep	+_Discard	9	9	9	47875	0	26757	384916504	128591986	2,99331665039063	2,99331665039063	3,03705785120049	1,73435217887163	6,05648229825235	Q16773;B7Z4W5;Q16773-2;Q5T278;Q16773-3;Q5T276	Q16773;B7Z4W5;Q16773-2	Kynurenine--oxoglutarate transaminase 1	CCBL1
1.18921065330505	0.027078477665782	1.00320518016815	0.871728718280792	0.0530805848538876	-0.462504118680954	-1.2863050699234	-1.39549446105957	Keep	Discard	+	1%_21%	+_Keep	+_Discard	7	7	7	30541	44222	42109	194610696	102956028	1,89023101329803	1,89023101329803	1,94005277990092	1,54561152355745	3,59171883158344	Q8IWD4;Q8IWD4-3;Q8IWD4-4;Q8IWD4-2;F8WBN8;B0QYH3;B0QYH1	Q8IWD4;Q8IWD4-3;Q8IWD4-4;Q8IWD4-2	Coiled-coil domain-containing protein 117	CCDC117
0.650781631469727	1.28027653694153	-0.171681299805641	1.10201442241669	-1.27699410915375	-0.820315003395081	0.358878493309021	-1.12296068668365	Keep	Discard	+	1%_21%	+_Keep	+_Discard	7	7	7	24479	0	13542	1201707696	665089864	1,80683505535126	1,80683505535126	1,56736172795105	1,43069564923644	2,90719144444742	Q86WR0;Q86WR0-2;G3V121;B7Z2L8;Q0VGD4	Q86WR0;Q86WR0-2	Coiled-coil domain-containing protein 25	CCDC25
0.845174551010132	0.897693693637848	0.953094005584717	1.03830635547638	-0.992294013500214	-0.876099765300751	-0.918524205684662	-0.947350561618805	Keep	Discard	+	1%_21%	+_Keep	+_Discard	20	19	18	34095	0	32331	7379136000	1145796192	6,44018173217773	6,44018173217773	7,71615906456049	1,86713428795338	38,9187845916921	P06493;A0A024QZP7;P06493-2;A0A087WZZ9;E5RIU6;Q07002;Q07002-3;Q07002-2	P06493;A0A024QZP7;P06493-2;A0A087WZZ9;E5RIU6	Cyclin-dependent kinase 1	CDK1;CDC2
0.800018012523651	0.892636358737946	0.307201147079468	0.921512186527252	0.065024346113205	-1.57010340690613	0.0492276400327682	-1.46551632881165	Keep	Discard	+	1%_21%	+_Keep	+_Discard	7	7	7	22073	0	50863	238736068	51078895,25	4,67386913299561	4,67386913299561	1,65363317926993	1,46068386361003	3,06085320500846	P46527;E7ES52;H7C2T1	P46527;E7ES52;H7C2T1	Cyclin-dependent kinase inhibitor 1B	CDKN1B
1.50030040740967	0.993718147277832	-0.0991434752941132	0.504272103309631	-1.59229648113251	-0.769439339637756	0.0671907067298889	-0.604602098464966	Keep	Discard	+	1%_21%	+_Keep	+_Discard	20	20	20	10683	0	64299	202015808	122122110	1,65421152114868	1,65421152114868	1,62090564176393	1,44957359880209	3,00225758521716	Q03188;H0Y8J2;Q03188-2;H0Y9W1	Q03188;H0Y8J2;Q03188-2	Centromere protein C	CENPC
0.881550848484039	0.915904521942139	1.01274991035461	0.722224235534668	-0.868654906749725	-0.34059664607048	-0.795821607112885	-1.5273562669754	Keep	Discard	+	1%_21%	+_Keep	+_Discard	4	4	1	95929	0	98993	2816745920	1473644928	1,91141426563263	1,91141426563263	3,37778763615636	1,76621473580599	7,01374732103046	D6REX9;Q8N960-2	D6REX9;Q8N960-2	Centrosomal protein of 120 kDa	CEP120
0.992536723613739	0.403206348419189	0.143785864114761	1.41694045066833	-1.52610421180725	-0.91376918554306	-0.771375596523285	0.254779577255249	Keep	Discard	+	1%_21%	+_Keep	+_Discard	10	10	10	33592	0	13409	342291976	206092004	1,66086971759796	1,66086971759796	1,70731192070479	1,47823470085859	3,1578063077083	Q9UEE9;Q9UEE9-2;H3BUV5;H3BUI4	Q9UEE9;Q9UEE9-2	Craniofacial development protein 1	CFDP1
1.00390422344208	1.00529885292053	0.899276196956635	0.362194955348969	-1.80899465084076	-0.432779371738434	-0.6766077876091	-0.35229229927063	Keep	Discard	+	1%_21%	+_Keep	+_Discard	5	5	5	1882	0	32582	1784510240	1182264480	1,50940024852753	1,50940024852753	2,34416427741924	1,63533708453178	4,40837953854696	Q9UFW8;C9JUJ0	Q9UFW8;C9JUJ0	CGG triplet repeat-binding protein 1	CGGBP1
0.921396195888519	0.905301570892334	-0.247723594307899	1.24540889263153	-1.05976486206055	-0.532454788684845	-1.49736618995667	0.265202820301056	Keep	Discard	+	1%_21%	+_Keep	+_Discard	33	19	15	22659	0	13044	212162548	131344786	1,61530995368958	1,61530995368958	1,51722090372727	1,41219152137637	2,81901787478064	Q12873;Q12873-3;Q12873-2;H7C3H7;H7C2H0;K7EPV1	Q12873;Q12873-3;Q12873-2	Chromodomain-helicase-DNA-binding protein 3	CHD3
-0.49100849032402	1.66459703445435	1.0974782705307	0.428339660167694	-0.140677496790886	-1.09693729877472	-0.33807584643364	-1.12371575832367	Keep	Discard	+	1%_21%	+_Keep	+_Discard	6	6	6	30748	0	16673	1191061512	467148488	2,54964232444763	2,54964232444763	1,36276898893146	1,34970321878791	2,55198990469659	Q9BT09;A0A0C4DFY8	Q9BT09	Protein canopy homolog 3	CNPY3
-0.0183582007884979	-0.0122518660500646	1.60146772861481	1.19764745235443	0.00616616057232022	-1.44039499759674	-0.533848404884338	-0.800427913665771	Keep	Discard	+	1%_21%	+_Keep	+_Discard	10	10	10	3714	0	66331	268432696	151094136	1,77659237384796	1,77659237384796	1,44550817012538	1,3842525674263	2,69422980017473	Q5HYK3;F8VVX6;F8VP53;B4DP72;F8VVW7;Q5HYK3-2	Q5HYK3;F8VVX6;F8VP53;B4DP72	2-methoxy-6-polyprenyl-1,4-benzoquinol methylase, mitochondrial	COQ5
0.974357545375824	0.92327892780304	0.946189701557159	0.886529326438904	-0.784555971622467	-0.953882396221161	-1.05795657634735	-0.933960616588593	Keep	Discard	+	1%_21%	+_Keep	+_Discard	12	12	9	47535	0	82802	4249102400	371149976	11,4484777450562	11,4484777450562	7,16278554168222	1,86517776548862	31,4435734048811	Q13363;Q13363-2;D6RAX2;H0Y8W7;E7ESU7;E7EPF8;H0Y9M9;E9PGB1;H0Y8U5;A0A087WYL1;E7EUB3	Q13363;Q13363-2;D6RAX2;H0Y8W7	C-terminal-binding protein 1	CTBP1
0.587237954139709	0.518366634845734	0.733330965042114	0.81830906867981	0.535932421684265	-1.72407150268555	-1.38272786140442	-0.0863776728510857	Keep	Discard	+	1%_21%	+_Keep	+_Discard	5	5	5	43813	99136	32214	117621730	63050179,5	1,86552560329437	1,86552560329437	1,31517360326111	1,32862230949104	2,47091111330568	E9PJD7;Q6ZMK1;E9PQ42;Q6ZMK1-2;Q6ZMK1-4	E9PJD7;Q6ZMK1;E9PQ42;Q6ZMK1-2	Cysteine and histidine-rich protein 1	CYHR1
1.08441877365112	1.27890813350677	0.910781979560852	-0.272038012742996	0.0275990106165409	-1.19577383995056	-0.623113632202148	-1.21078240871429	Keep	Discard	+	1%_21%	+_Keep	+_Discard	1	1	1	2557	1	-2	423389824	280653032	1,50858819484711	1,50858819484711	1,78099349449608	1,50103543605655	3,2926990812145	E9PMA7	E9PMA7		DDIAS
0.866196095943451	0.936805069446564	0.809900879859924	1.11073398590088	-0.871947705745697	-0.978220224380493	-0.86503404378891	-1.00843417644501	Keep	Discard	+	1%_21%	+_Keep	+_Discard	39	39	36	87343	0	32331	6927772672	1528735136	4,53170251846313	4,53170251846313	6,55546734369064	1,86181804537773	24,8672034311154	Q9NR30;Q9NR30-2	Q9NR30;Q9NR30-2	Nucleolar RNA helicase 2	DDX21
0.51657646894455	1.3254873752594	0.234188437461853	0.679337382316589	0.0467665418982506	-1.84905099868774	0.0638637989759445	-1.01716899871826	Keep	Discard	+	1%_21%	+_Keep	+_Discard	16	16	16	68809	0	69	101868192	37885945,75	2,68881225585938	2,68881225585938	1,42956715433479	1,37779483012855	2,66668756947839	Q5T1V6;Q5T1V6-2;B7ZBU3;H0Y6Y1;Q5T1W1;H0Y7Z8;Q5T1V5;B7ZBU4	Q5T1V6;Q5T1V6-2	Probable ATP-dependent RNA helicase DDX59	DDX59
0.772930860519409	0.886608600616455	1.04873549938202	1.01707541942596	-0.834296584129333	-0.967157304286957	-0.968342125415802	-0.955554306507111	Keep	Discard	+	1%_21%	+_Keep	+_Discard	26	26	26	54416	0	32331	8426881280	1102682688	7,64216375350952	7,64216375350952	6,68554695517158	1,86267517507076	26,1506098977691	P26196;Q8IV96	P26196	Probable ATP-dependent RNA helicase DDX6	DDX6
0.966876029968262	1.04748213291168	0.743606150150299	0.84438681602478	-1.17672419548035	-1.10801386833191	-0.991647124290466	-0.325966000556946	Keep	Discard	+	1%_21%	+_Keep	+_Discard	10	10	9	53671	0	28147	364338464	153040968	2,38065981864929	2,38065981864929	3,9015477858779	1,80117557942867	8,72388530782734	Q9H6A0;Q9H6A0-2;Q68D51-3	Q9H6A0;Q9H6A0-2	DENN domain-containing protein 2D	DENND2D
0.577099025249481	0.661238253116608	0.933579385280609	1.2857654094696	-0.408540040254593	-1.53380513191223	-0.894363701343536	-0.620973229408264	Keep	Discard	+	1%_21%	+_Keep	+_Discard	4	4	4	40848	44438	43292	170223776	73765436	2,30763578414917	2,30763578414917	2,98646511306503	1,72884104400873	5,9234417131396	Q6UX07;Q6UX07-2;Q6UX07-3	Q6UX07;Q6UX07-2;Q6UX07-3	Dehydrogenase/reductase SDR family member 13	DHRS13
0.846675992012024	0.818978726863861	0.691084802150726	0.750174045562744	-2.04050230979919	-0.215650722384453	-0.424268037080765	-0.42649245262146	Keep	Discard	+	1%_21%	+_Keep	+_Discard	27	27	27	17735	0	32331	555677472	350475640	1,58549511432648	1,58549511432648	1,97041498508678	1,55345677211881	3,65010693484206	Q6XZF7;Q6XZF7-2;Q5SVK9	Q6XZF7;Q6XZF7-2	Dynamin-binding protein	DNMBP
0.646782755851746	1.31811082363129	1.11768889427185	-0.222860515117645	-0.165428385138512	-1.59488749504089	-0.119597569108009	-0.979808449745178	Keep	Discard	+	1%_21%	+_Keep	+_Discard	2	2	1	2331	1	-2	36687460,5	15276729,75	2,4015257358551	2,4015257358551	1,56505148340244	1,42986096441746	2,90311119236713	Q8IZD9;C9J7D9	Q8IZD9;C9J7D9	Dedicator of cytokinesis protein 3	DOCK3;DOCK4
1.73310780525208	1.2130024433136	-0.191498592495918	0.231600016355515	-0.737280070781708	-0.517456412315369	-0.616433084011078	-1.11504220962524	Keep	Discard	+	1%_21%	+_Keep	+_Discard	7	7	7	83196	0	76214	282193816	102723046	2,74713253974915	2,74713253974915	1,75483450760427	1,49310586228967	3,24456035107643	Q6ZPD9;K7ELH8;Q6ZPD9-2;Q8N6Q4;K7ELG1;K7ELB5	Q6ZPD9;K7ELH8;Q6ZPD9-2	Probable C-mannosyltransferase DPY19L3	DPY19L3
1.25673151016235	0.857857346534729	0.710509896278381	0.825026750564575	-0.746036410331726	-1.25846838951111	-0.773480772972107	-0.872139871120453	Keep	Discard	+	1%_21%	+_Keep	+_Discard	18	18	18	23819	0	14278	6954692224	4511517120	1,54154169559479	1,54154169559479	4,44453591538505	1,82506273686886	10,8698210395676	P23919;P23919-2;H7C312;H7BZ20;G5E9E9;H7C3A4	P23919;P23919-2;H7C312;H7BZ20	Thymidylate kinase	DTYMK
0.85039085149765	0.756663620471954	0.890591204166412	0.628714621067047	-2.01970720291138	-0.494469940662384	-0.354869723320007	-0.257313400506973	Keep	Discard	+	1%_21%	+_Keep	+_Discard	11	11	11	26563	0	23566	8242864896	1119602526	7,36231374740601	7,36231374740601	2,00915850025222	1,56318014115095	3,72525967871034	P33316;P33316-2;H0YNW5;H0YKC5;H0YKI0;H0YMM5;A0A0C4DGL3;H0YNJ9;H0YMP1	P33316;P33316-2;H0YNW5;H0YKC5;H0YKI0;H0YMM5;A0A0C4DGL3;H0YNJ9	Deoxyuridine 5-triphosphate nucleotidohydrolase, mitochondrial	DUT
0.422254890203476	0.504351019859314	1.04601442813873	0.893715023994446	0.362498074769974	-0.561231434345245	-1.91260254383087	-0.754999399185181	Keep	Discard	+	1%_21%	+_Keep	+_Discard	4	1	1	93848	1	-2	448160856	99432995,75	4,507164478302	4,507164478302	1,57423148717916	1,43316766619682	2,91933481473498	M0R0I6	M0R0I6		EEF2
0.825558423995972	1.28223788738251	1.09359753131866	0.341253101825714	-0.906413733959198	-0.502262711524963	-0.992348313331604	-1.14162218570709	Keep	Discard	+	1%_21%	+_Keep	+_Discard	11	11	11	4602	0	10452	642058208	284930304	2,25338697433472	2,25338697433472	3,4421118824761	1,77132347226143	7,20728201911118	Q9GZT9;Q9GZT9-3;Q9GZT9-2	Q9GZT9;Q9GZT9-3;Q9GZT9-2	Egl nine homolog 1	EGLN1
0.682173669338226	0.744497001171112	0.709679186344147	0.688556015491486	-1.16433906555176	-1.32376456260681	0.790205538272858	-1.1270078420639	Keep	Discard	+	1%_21%	+_Keep	+_Discard	18	18	18	12902	0	17165	199945932	72467577,5	2,75910902023315	2,75910902023315	1,51791394693096	1,41245295107365	2,82023124705732	Q96KQ7-2;A0A0G2JIS2;A2ABF8;Q96KQ7;A0A0G2JIR1;A2ABF9;A0A0G2JK64;A0A0G2JRR0;A0A0G2JRN8;H0Y4K5;Q96KQ7-3	Q96KQ7-2;A0A0G2JIS2;A2ABF8;Q96KQ7;A0A0G2JIR1;A2ABF9;A0A0G2JK64;A0A0G2JRR0;A0A0G2JRN8	Histone-lysine N-methyltransferase EHMT2	EHMT2
0.908472120761871	0.935842394828796	0.977929055690765	0.908116400241852	-1.08217942714691	-0.949070394039154	-0.814041018486023	-0.885069131851196	Keep	Discard	+	1%_21%	+_Keep	+_Discard	23	23	6	36112	0	32331	8023010304	1173163104	6,83878469467163	6,83878469467163	7,16328985813145	1,86517998576164	31,4496918333885	P05198;G3V4T5	P05198;G3V4T5	Eukaryotic translation initiation factor 2 subunit 1	EIF2S1
0.959860444068909	0.829558134078979	1.09383654594421	0.843084573745728	-0.969915151596069	-0.859439969062805	-0.996364951133728	-0.900619626045227	Keep	Discard	+	1%_21%	+_Keep	+_Discard	15	15	15	37563	0	32331	7563611392	1174106336	6,44201517105103	6,44201517105103	6,76700566672548	1,86316984891891	26,9872853373878	O00303;H0YDT6;A0A0D9SEZ9;E9PQV8	O00303	Eukaryotic translation initiation factor 3 subunit F	EIF3F
1.0040271282196	0.92987060546875	1.02582788467407	0.70415461063385	-1.21559631824493	-0.666139721870422	-1.07772469520569	-0.704419434070587	Keep	Discard	+	1%_21%	+_Keep	+_Discard	29	14	14	46402	0	32331	3111758784	913410336	3,40674805641174	3,40674805641174	4,65549000906292	1,83194009959698	11,825304793283	Q14240;Q14240-2;E7EQG2;J3KSN7;E7EMV8;E9PBH4;C9JUF0;F8WE11	Q14240;Q14240-2;E7EQG2	Eukaryotic initiation factor 4A-II;Eukaryotic initiation factor 4A-II, N-terminally processed	EIF4A2
0.31417852640152	1.13509690761566	0.703129649162292	0.938566088676453	0.0881991162896156	-1.30047571659088	-0.317339837551117	-1.56135475635529	Keep	Discard	+	1%_21%	+_Keep	+_Discard	1	1	1	81466	90874	15942	557923384	302342124	1,84533798694611	1,84533798694611	1,93957161535252	1,5454855915159	3,59079705037067	Q96BJ8;I3L4D1;F8W9E7;Q96BJ8-3	Q96BJ8;I3L4D1;F8W9E7;Q96BJ8-3	Engulfment and cell motility protein 3	ELMO3
0.342723518610001	0.672571182250977	0.109720453619957	1.85327196121216	-0.0255782715976238	-0.996729910373688	-0.782436728477478	-1.17354214191437	Keep	Discard	+	1%_21%	+_Keep	+_Discard	20	20	20	29248	0	11733	99748782	62732924	1,5900547504425	1,5900547504425	1,74198056749861	1,48914354201406	3,22100724926892	Q9HCE0;Q9HCE0-2;K7EPN4;K7EM87;K7ENS1;K7ENK5	Q9HCE0;Q9HCE0-2	Ectopic P granules protein 5 homolog	EPG5
0.93787282705307	0.898509323596954	0.16207255423069	1.11690640449524	-1.84769701957703	-0.298033505678177	-0.302567929029465	-0.667062640190125	Keep	Discard	+	1%_21%	+_Keep	+_Discard	11	5	5	11056	72265	37044	131679726	66677784	1,97486662864685	1,97486662864685	1,98708963721895	1,55768055096269	3,68236162867702	O15083;H7C4G9	O15083;H7C4G9	ERC protein 2	ERC2
0.719721853733063	0.897441327571869	0.926544845104218	0.747089445590973	-1.19736039638519	-1.65190887451172	-0.22417750954628	-0.217350691556931	Keep	Discard	+	1%_21%	+_Keep	+_Discard	11	11	11	10023	0	13343	132982268	18729392,5	7,10019159317017	7,10019159317017	2,39922511407602	1,64539873600006	4,52691629147323	Q7Z2K6;E7ER77;A0A0C4DGF0;Q7Z2K6-2	Q7Z2K6;E7ER77	Endoplasmic reticulum metallopeptidase 1	ERMP1
0.951705634593964	0.278768599033356	1.26968824863434	0.851384103298187	-0.388956636190414	-0.63360732793808	-0.709103763103485	-1.61987888813019	Keep	Discard	+	1%_21%	+_Keep	+_Discard	1	1	1	13246	9894	31833	194086168	128290954	1,51285946369171	1,51285946369171	2,5822821340318	1,6757733002305	4,93521060285327	Q17RB0;A6ZKI3;Q9BWD3	Q17RB0;A6ZKI3;Q9BWD3	Protein FAM127C;Protein FAM127A;Protein FAM127B	FAM127C;FAM127A;FAM127B
0.685862243175507	0.84111875295639	0.650371789932251	0.528145492076874	-0.257120013237	-0.177133142948151	-0.0303110182285309	-2.24093413352966	Keep	Discard	+	1%_21%	+_Keep	+_Discard	8	8	8	17342	0	89593	6347309568	2002937440	3,16900038719177	3,16900038719177	1,36981964672043	1,35274914652109	2,56404456880888	Q96A26;F8W7Q4;E9PH05	Q96A26;F8W7Q4;E9PH05	Protein FAM162A	FAM162A
1.04117345809937	1.3149561882019	0.221212819218636	0.706299126148224	-0.399337559938431	-1.61867272853851	-0.803946375846863	-0.461684912443161	Keep	Discard	+	1%_21%	+_Keep	+_Discard	11	11	11	40241	0	7845	752088400	499429448	1,50589513778687	1,50589513778687	2,37935913356112	1,64182079210877	4,48392889550704	Q14320;B0S8I6;Q9Y247	Q14320;B0S8I6	Protein FAM50A	FAM50A
0.802556812763214	0.965207576751709	0.688091695308685	0.37043821811676	-1.17974388599396	0.72076803445816	-0.959849655628204	-1.40746891498566	Keep	Discard	+	1%_21%	+_Keep	+_Discard	17	16	2	66245	0	32331	60156482	22968795,75	2,61905241012573	2,61905241012573	1,51975664729308	1,41314718127251	2,8234581406976	Q06787-8;Q06787-5;Q06787-9;Q06787;Q06787-3	Q06787-8;Q06787-5;Q06787-9;Q06787;Q06787-3	Fragile X mental retardation protein 1	FMR1
1.00640630722046	0.767257332801819	-0.033177588135004	1.56641316413879	-0.52902764081955	-1.17281770706177	-0.813502132892609	-0.79155170917511	Keep	Discard	+	1%_21%	+_Keep	+_Discard	5	5	4	58025	0	59043	52798479	24613161,5	2,14513182640076	2,14513182640076	2,4451448697612	1,65344960149378	4,62724636250092	P34059;H3BP66	P34059	N-acetylgalactosamine-6-sulfatase	GALNS
0.662555932998657	0.738890469074249	0.693779706954956	0.6331427693367	-0.421166241168976	0.00487225176766515	-0.0877184942364693	-2.22435641288757	Keep	Discard	+	1%_21%	+_Keep	+_Discard	17	17	17	48455	0	15899	5961405824	1935312400	3,08033275604248	3,08033275604248	1,39669967268952	1,36418444372248	2,6101118429589	P50440;P50440-2;P50440-3;H0YMX4;H0YN43;H0YLC6;H0YKW9	P50440;P50440-2;P50440-3	Glycine amidinotransferase, mitochondrial	GATM
1.23568844795227	0.549046635627747	0.519227087497711	0.478529393672943	0.258807867765427	-0.0306977480649948	-1.69667673110962	-1.313924908638	Keep	Discard	+	1%_21%	+_Keep	+_Discard	10	10	10	35964	0	37454	564561520	150412491	3,75342178344727	3,75342178344727	1,46303210378683	1,39124577119946	2,72458718258015	Q92820	Q92820	Gamma-glutamyl hydrolase	GGH
1.0880411863327	-0.0561008453369141	0.942975580692291	1.1215113401413	0.200670585036278	-1.09503757953644	-1.13356935977936	-1.06849098205566	Keep	Discard	+	1%_21%	+_Keep	+_Discard	5	3	3	40923	46211	20007	123843600	42394178	2,92124080657959	2,92124080657959	1,95003719975931	1,54821364954114	3,61087095890529	P19086	P19086	Guanine nucleotide-binding protein G(z) subunit alpha	GNAZ
0.974162399768829	1.22450709342957	0.868240475654602	0.607108414173126	-0.764797687530518	-0.932820439338684	-0.885683357715607	-1.09071695804596	Keep	Discard	+	1%_21%	+_Keep	+_Discard	39	39	17	63146	0	32331	8879395712	5582986112	1,59043836593628	1,59043836593628	4,83656725037853	1,83700920641422	12,7069984293573	P06744;A0A0A0MTS2;P06744-2;K7EQ48;K7EPY4;K7EP41;K7ERC6;K7ELR7;K7ERK8;K7ESF4;K7EIL4	P06744;A0A0A0MTS2;P06744-2;K7EQ48	Glucose-6-phosphate isomerase	GPI
0.653774797916412	-0.0337100736796856	1.80182135105133	0.78407484292984	-0.661389172077179	-0.960367858409882	-1.0106372833252	-0.573566555976868	Keep	Discard	+	1%_21%	+_Keep	+_Discard	3	3	3	49395	0	38549	126013448	67926275	1,85515034198761	1,85515034198761	2,18233488063809	1,60298044700176	4,07058189475981	Q86V85	Q86V85	Integral membrane protein GPR180	GPR180
0.916394412517548	0.698430299758911	0.846940696239471	0.712331175804138	-0.900356829166412	-1.77987682819366	-0.663547515869141	0.169684588909149	Keep	Discard	+	1%_21%	+_Keep	+_Discard	4	4	4	67257	1621	73108	64557820	22212228,5	2,90640902519226	2,90640902519226	2,10997808365823	1,58704829216003	3,92436869861384	P43250-2;P43250;D6RHX8;F8W9W2;P43250-3;P34947;D6RDA3;D6RHC7	P43250-2;P43250;D6RHX8;F8W9W2;P43250-3	G protein-coupled receptor kinase 6	GRK6
0.245359688997269	0.399437040090561	1.17545127868652	1.19129741191864	-0.329603254795074	0.0709664076566696	-1.18094646930695	-1.57196199893951	Keep	Discard	+	1%_21%	+_Keep	+_Discard	10	10	10	13142	0	44095	287756432	167539752	1,71754121780396	1,71754121780396	1,7969066268963	1,50577268376946	3,32212045714462	Q9UBN7;Q9UBN7-2;A6NDI8;E7EPS2;C9J172;E9PEH1;E7EP63;E7ER52;C9JEF4;H7C0Z9	Q9UBN7;Q9UBN7-2	Histone deacetylase 6	HDAC6
0.300026565790176	0.823909103870392	0.947767674922943	0.695615708827972	0.126910910010338	0.191666528582573	-1.67484223842621	-1.41105425357819	Keep	Discard	+	1%_21%	+_Keep	+_Discard	4	4	4	58836	16447	78916	17553135,5	4032146,5	4,35329818725586	4,35329818725586	1,44403472496166	1,38365952670574	2,69168115594993	Q9UBI9	Q9UBI9	Headcase protein homolog	HECA
0.533111870288849	0.628180325031281	0.490368604660034	1.24622523784637	-1.57635521888733	-0.010097018443048	-1.42471480369568	0.113280974328518	Keep	Discard	+	1%_21%	+_Keep	+_Discard	12	12	12	43482	0	95502	1603427136	1013135872	1,58263778686523	1,58263778686523	1,61907595401209	1,44894302613102	2,9989928621371	Q6NVY1;A0A087WXI1;Q6NVY1-2;F8W8A6;B9A058;B8ZZZ0;H7C1A5;H7C400;H7C126;H7BYI7	Q6NVY1;A0A087WXI1;Q6NVY1-2	3-hydroxyisobutyryl-CoA hydrolase, mitochondrial	HIBCH
1.04999828338623	1.24524223804474	0.774774670600891	0.377387911081314	-0.571764945983887	-1.54723536968231	-0.641858279705048	-0.68654465675354	Keep	Discard	+	1%_21%	+_Keep	+_Discard	18	18	1	15388	0	13244	6951707520	4191147392	1,65866446495056	1,65866446495056	2,94105803246104	1,72370158880949	5,80590956361626	Q71DI3;P68431	Q71DI3;P68431	Histone H3.2;Histone H3.1	HIST2H3A;HIST1H3A
1.03594708442688	0.958331286907196	1.08506572246552	0.519051194190979	-1.32945287227631	-0.723061680793762	-0.968511521816254	-0.577369272708893	Keep	Discard	+	1%_21%	+_Keep	+_Discard	8	8	8	40574	0	46654	1376192224	282401480	4,87317657470703	4,87317657470703	3,86541406523114	1,79919765889645	8,59546380694599	Q96FZ2;E7EMP6;D6R9T3;D6RGK7;D6RAI0;D6RAZ3	Q96FZ2;E7EMP6;D6R9T3;D6RGK7;D6RAI0;D6RAZ3	Embryonic stem cell-specific 5-hydroxymethylcytosine-binding protein	HMCES
0.784456193447113	0.866104900836945	0.548140466213226	0.523819029331207	-0.247868061065674	0.0151913622394204	-0.270674586296082	-2.21916937828064	Keep	Discard	+	1%_21%	+_Keep	+_Discard	8	8	7	3436	0	1534	1550316352	515128784	3,00957036018372	3,00957036018372	1,38976365729473	1,36126031330787	2,59820785670147	P35914;P35914-3;P35914-2	P35914;P35914-3;P35914-2	Hydroxymethylglutaryl-CoA lyase, mitochondrial	HMGCL
1.29644846916199	1.01373744010925	0.598842322826385	0.684969246387482	-0.653006255626678	-0.9540975689888	-0.7167067527771	-1.27018702030182	Keep	Discard	+	1%_21%	+_Keep	+_Discard	9	1	1	32837	1	-2	231178732	46458121	4,97606754302979	4,97606754302979	3,82640802871921	1,79699876904488	8,45868130383816	P30519-2	P30519-2	Heme oxygenase 2	HMOX2
0.327577978372574	0.914777874946594	0.654674530029297	1.15802526473999	-1.84716403484344	-0.801487267017365	0.0699953138828278	-0.476399660110474	Keep	Discard	+	1%_21%	+_Keep	+_Discard	7	7	7	4278	0	4057	202118016	128171494	1,57693421840668	1,57693421840668	1,872905727486	1,52752782404423	3,46411929869017	Q53T59;F6TR53;B5MC96;H7C0Y9;H7BZZ1	Q53T59;F6TR53;B5MC96	HCLS1-binding protein 3	HS1BP3
1.36137497425079	0.933435797691345	0.635154902935028	0.557205379009247	-0.9287348985672	-0.659047901630402	-1.42965543270111	-0.469732791185379	Keep	Discard	+	1%_21%	+_Keep	+_Discard	9	9	9	37001	0	65715	501750400	147199228	3,40864825248718	3,40864825248718	3,126679857798	1,74358551949263	6,29771021228894	Q3SXM5;Q3SXM5-2;H3BQI7;H3BT52;H3BNH5	Q3SXM5;Q3SXM5-2	Inactive hydroxysteroid dehydrogenase-like protein 1	HSDL1
0.723081886768341	0.727385938167572	0.65475195646286	0.813652694225311	-0.208595514297485	-0.1077935770154	-2.14259171485901	-0.459891587495804	Keep	Discard	+	1%_21%	+_Keep	+_Discard	5	5	5	39002	0	99735	391355816	88304206,5	4,43190431594849	4,43190431594849	1,64991118388009	1,45943621732295	3,05417003281195	Q96JZ2;K7EP18;Q96JZ2-2;K7ES08;A0A087X0V9;A0A087WT88	Q96JZ2;K7EP18;Q96JZ2-2	Hematopoietic SH2 domain-containing protein	HSH2D
0.911114931106567	0.605489432811737	0.527414381504059	0.661234736442566	0.21024027466774	-0.446022301912308	-0.287219643592834	-2.18225169181824	Keep	Discard	+	1%_21%	+_Keep	+_Discard	11	11	11	51529	0	13746	279668808	77586217	3,60461974143982	3,60461974143982	1,36953551444555	1,35262671113014	2,56355855417282	Q9NWZ3;Q9NWZ3-2;F8VW24;F8VVZ1;F8VR40	Q9NWZ3;Q9NWZ3-2	Interleukin-1 receptor-associated kinase 4	IRAK4
0.0206396114081144	1.00520133972168	1.31675732135773	0.687856137752533	0.276454120874405	-0.906795024871826	-1.16023361682892	-1.23987984657288	Keep	Discard	+	1%_21%	+_Keep	+_Discard	8	8	8	20363	0	72393	705009248	310067656	2,27372741699219	2,27372741699219	1,82933021709549	1,51522719440982	3,38239672911238	Q96AZ6;H0YMM4;H3BLY5;Q96AZ6-2	Q96AZ6;H0YMM4	Interferon-stimulated gene 20 kDa protein	ISG20
0.269345045089722	0.521249353885651	0.953813791275024	1.03475987911224	-2.08366656303406	-0.239921227097511	-0.52126806974411	0.0656876638531685	Keep	Discard	+	1%_21%	+_Keep	+_Discard	7	6	6	93924	0	1153	57205114	21777649	2,62678098678589	2,62678098678589	1,45884306331367	1,38958406634629	2,71732257874718	Q92830;K7ERS6;Q92830-2	Q92830	Histone acetyltransferase KAT2A	KAT2A
1.02421021461487	0.909386277198792	0.972739338874817	0.803848683834076	-1.18166863918304	-0.879599928855896	-0.85699051618576	-0.791925489902496	Keep	Discard	+	1%_21%	+_Keep	+_Discard	26	24	24	14734	0	17637	274168180	32146936	8,52859497070313	8,52859497070313	5,83018767980538	1,85509227216244	18,765981616739	Q9Y4C1;F5H070;F8WE62;C9J7Q7;C9JC73	Q9Y4C1;F5H070;F8WE62	Lysine-specific demethylase 3A	KDM3A
1.4927544593811	0.279402613639832	0.375272572040558	1.13691771030426	-1.23256242275238	-0.27752810716629	-1.09923839569092	-0.675018429756165	Keep	Discard	+	1%_21%	+_Keep	+_Discard	11	10	9	12066	0	16317	76211444	22083316,75	3,45108675956726	3,45108675956726	2,38130425638766	1,64217367768288	4,4881268785707	O75164;O75164-2	O75164	Lysine-specific demethylase 4A	KDM4A
0.816507399082184	0.745608270168304	1.09819114208221	0.737938582897186	-0.894109129905701	-0.426262199878693	-1.70485591888428	-0.373018115758896	Keep	Discard	+	1%_21%	+_Keep	+_Discard	16	15	15	17566	0	22613	90173552	10895142,25	8,27649211883545	8,27649211883545	2,74419032156654	1,69912268966436	5,31589601352344	Q9UGL1;Q9UGL1-2;B3KV94	Q9UGL1;Q9UGL1-2;B3KV94	Lysine-specific demethylase 5B	KDM5B
0.839180469512939	0.28868556022644	0.910570859909058	1.03703451156616	0.131651937961578	-1.32515704631805	-1.55887675285339	-0.323089569807053	Keep	Discard	+	1%_21%	+_Keep	+_Discard	8	8	8	17663	98592	31203	15805330	2231555,5	7,08265161514282	7,08265161514282	1,9103373298862	1,53773570805788	3,53499511726941	O15054;O15054-1;I3L0Z0	O15054;O15054-1	Lysine-specific demethylase 6B	KDM6B
0.757320940494537	0.476697683334351	0.793250620365143	0.768764138221741	0.675763130187988	-0.728186905384064	-1.03389167785645	-1.70971786975861	Keep	Discard	+	1%_21%	+_Keep	+_Discard	4	4	4	74533	0	88457	72644346	44529506	1,63137555122375	1,63137555122375	1,48026460940302	1,39801667630672	2,75452397034017	O15037;G3V3G3	O15037	Protein KHNYN	KHNYN
0.459804743528366	0.977819502353668	0.835376799106598	0.60399067401886	0.556452512741089	-1.11886811256409	-0.64267510175705	-1.67190098762512	Keep	Discard	+	1%_21%	+_Keep	+_Discard	7	7	7	69156	15375	54498	128276632	64642884	1,98438906669617	1,98438906669617	1,5891812588602	1,43849585205317	2,94581485644078	Q8IYS2;Q8IYS2-2;A0A0G2JP75	Q8IYS2;Q8IYS2-2;A0A0G2JP75	Uncharacterized protein KIAA2013	KIAA2013
1.03944170475006	1.18309915065765	0.81615936756134	-0.0977501943707466	0.259937196969986	-1.10254907608032	-0.625215530395508	-1.47312259674072	Keep	Discard	+	1%_21%	+_Keep	+_Discard	7	7	7	65991	1645	79019	1178470992	555673240	2,12079882621765	2,12079882621765	1,68326982637098	1,47047500871122	3,11424915730581	Q8IXQ5;Q8IXQ5-5;Q8IXQ5-2;Q8IXQ5-3;E5RFN1;H7C259;Q8IXQ5-4	Q8IXQ5;Q8IXQ5-5;Q8IXQ5-2	Kelch-like protein 7	KLHL7
0.206433892250061	0.468524575233459	1.47095882892609	1.11502945423126	-0.567606866359711	-1.4348201751709	-0.34815776348114	-0.910361886024475	Keep	Discard	+	1%_21%	+_Keep	+_Discard	6	6	6	88385	16319	75568	1016501984	524858408	1,93671667575836	1,93671667575836	2,31841542489039	1,63047336041927	4,35359152163325	Q13164;Q13164-3;Q13164-2;Q13164-4;S4R3I1;J3KT61;C9JUK9;I3L0J8	Q13164;Q13164-3;Q13164-2;Q13164-4	Mitogen-activated protein kinase 7	MAPK7
0.278255194425583	0.0127848936244845	1.89364981651306	0.707324087619781	-0.602249622344971	-0.961867153644562	-1.24128949642181	-0.0866077765822411	Keep	Discard	+	1%_21%	+_Keep	+_Discard	7	7	7	31371	0	69399	323741492	203826112	1,58832204341888	1,58832204341888	1,61059508552816	1,44600701029412	2,98387557929326	Q68D91;Q68D91-2	Q68D91;Q68D91-2	Metallo-beta-lactamase domain-containing protein 2	MBLAC2
0.848127365112305	0.762074410915375	0.654660761356354	0.652891457080841	-2.10490322113037	-0.155398577451706	-0.623842120170593	-0.0336101911962032	Keep	Discard	+	1%_21%	+_Keep	+_Discard	5	5	5	52764	0	14671	483941432	142151702	3,40440154075623	3,40440154075623	1,64824662590324	1,45887702610344	3,05118278974398	Q96N66;Q96N66-3;A9C4B8;Q96N66-2;H7C2M4;C9J4E9;A0A0G2JNX6;M0R1Z5	Q96N66;Q96N66-3;A9C4B8;Q96N66-2	Lysophospholipid acyltransferase 7	MBOAT7
0.848960280418396	0.713181674480438	0.984851717948914	0.850044429302216	-0.346244424581528	-1.62503242492676	-0.324862062931061	-1.10089921951294	Keep	Discard	+	1%_21%	+_Keep	+_Discard	8	8	8	50733	0	14604	346887048	63503025	5,46252775192261	5,46252775192261	2,73972652086222	1,69851905852556	5,30513957121328	Q9H7H0;Q9H7H0-2;Q9H7H0-3;G3V353;G3V4P2;G3V3X6;G3V4H5;H0YJW1;B4E298	Q9H7H0;Q9H7H0-2;Q9H7H0-3;G3V353	Methyltransferase-like protein 17, mitochondrial	METTL17
0.766848921775818	0.641282439231873	0.628323972225189	0.704328536987305	0.199548035860062	-1.53993237018585	-1.62703824043274	0.226638793945313	Keep	Discard	+	1%_21%	+_Keep	+_Discard	7	7	7	28319	0	1015	1336602336	399651590	3,34441900253296	3,34441900253296	1,41156937735467	1,37039191275835	2,63567293231068	Q9H8H3;H0YI09;F8VQX6	Q9H8H3;H0YI09;F8VQX6	Methyltransferase-like protein 7A	METTL7A
0.792352616786957	0.619253754615784	0.753296256065369	0.935459852218628	-1.94560992717743	0.0227896794676781	-0.771721363067627	-0.405820816755295	Keep	Discard	+	1%_21%	+_Keep	+_Discard	20	20	19	98583	0	10202	289759024	159277980	1,81920337677002	1,81920337677002	1,95764322893785	1,55018122680485	3,62549259890936	Q9NXC5;Q9NXC5-2;C9JAQ1;C9JTV2	Q9NXC5;Q9NXC5-2	WD repeat-containing protein mio	MIOS
1.1697016954422	0.867011070251465	0.808695614337921	0.304727047681808	-1.83461475372314	-0.71101325750351	-0.501221895217896	-0.10328546911478	Keep	Discard	+	1%_21%	+_Keep	+_Discard	6	6	6	25464	16353	76979	926391536	423577740	2,18706393241882	2,18706393241882	2,05830749298408	1,57506770081818	3,8216711338765	Q96BX8;K7EPX7;K7EKK6;K7ELS3;K7ESA9;Q86TA1;K7ESI3	Q96BX8	MOB kinase activator 3A	MOB3A
1.33120787143707	1.32170784473419	0.654535353183746	-0.183420464396477	-0.493294030427933	-1.38931095600128	-0.81413197517395	-0.427293568849564	Keep	Discard	+	1%_21%	+_Keep	+_Discard	12	12	6	46655	0	8365	744722496	411289000	1,81070363521576	1,81070363521576	2,00444955619168	1,56201528385282	3,71608615266567	P34949;H3BPB8;F5GX71;P34949-2;H3BPP3;H3BP57;H3BT48;H3BUZ9;H3BMZ9;H3BPM5;H3BT46;H3BNY8;B4DYB8;H3BU66;H3BQX0	P34949;H3BPB8;F5GX71;P34949-2;H3BPP3;H3BP57;H3BT48;H3BUZ9;H3BMZ9;H3BPM5;H3BT46;H3BNY8;B4DYB8	Mannose-6-phosphate isomerase	MPI
1.42450082302094	0.392660081386566	-0.359592765569687	1.27163207530975	-0.026947595179081	-0.472118824720383	-1.53926610946655	-0.690867602825165	Keep	Discard	+	1%_21%	+_Keep	+_Discard	3	3	1	18628	0	88022	564592608	176419134	3,20029139518738	3,20029139518738	1,39768912789788	1,36460008658469	2,6118109819748	B5MC53;B5MCF8;P39210;G5E9F5;E7EX18;B5MC10;A8MPV4;H0Y6M5	B5MC53;B5MCF8;P39210;G5E9F5;E7EX18	Protein Mpv17	MPV17
0.475987553596497	0.0620701834559441	1.571941614151	0.84924578666687	-0.787404417991638	-1.6831386089325	-0.294290602207184	-0.19441145658493	Keep	Discard	+	1%_21%	+_Keep	+_Discard	2	1	1	12658	0	40989	578764944	308038368	1,87887287139893	1,87887287139893	1,71166543609288	1,47962255589664	3,16571712849845	C9J473	C9J473		MPV17
0.642971038818359	0.952422618865967	0.625325798988342	0.935052990913391	-1.59541285037994	0.0676958113908768	-1.33312118053436	-0.294934272766113	Keep	Discard	+	1%_21%	+_Keep	+_Discard	5	5	5	20616	0	34365	1026204016	534522080	1,9198534488678	1,9198534488678	2,07026384707411	1,5778862349689	3,84531105823744	P82912;P82912-2;H0YL99;P82912-3	P82912;P82912-2;H0YL99	28S ribosomal protein S11, mitochondrial	MRPS11
0.804133355617523	0.717530488967896	0.564729273319244	0.578223943710327	-2.26213979721069	-0.141545295715332	-0.213842362165451	-0.0470895171165466	Keep	Discard	+	1%_21%	+_Keep	+_Discard	2	2	2	15173	20621	26647	1764870976	643477094	2,74270963668823	2,74270963668823	1,32334829276037	1,33230850845575	2,48480126614357	O15235	O15235	28S ribosomal protein S12, mitochondrial	MRPS12
0.318265348672867	-0.239420250058174	1.13682341575623	1.73278844356537	-0.606544494628906	-0.775836229324341	-1.20157492160797	-0.364501386880875	Keep	Discard	+	1%_21%	+_Keep	+_Discard	3	3	3	15139	0	69698	2720111296	1156238528	2,35255193710327	2,35255193710327	1,69483695201411	1,47422849759459	3,1351780414641	O60783	O60783	28S ribosomal protein S14, mitochondrial	MRPS14
0.539627850055695	0.5587557554245	0.721437096595764	1.24870407581329	0.340689867734909	-1.47840332984924	-1.24026763439178	-0.690543711185455	Keep	Discard	+	1%_21%	+_Keep	+_Discard	2	2	2	42717	29927	46153	276095632	140793144	1,96100175380707	1,96100175380707	1,89746686806965	1,53426239639521	3,5105534425842	P00156	P00156	Cytochrome b	MT-CYB
0.614585638046265	1.05456149578094	0.192289620637894	1.11138916015625	0.229358643293381	-1.27007174491882	-0.372000157833099	-1.56011271476746	Keep	Discard	+	1%_21%	+_Keep	+_Discard	3	3	3	1801	0	1971	692857760	282473316	2,45282554626465	2,45282554626465	1,73320481441464	1,48641297221184	3,20496459327611	Q9UDX5;B5MC22;H7C417;F8WEN7;Q9UDX5-2	Q9UDX5;B5MC22;H7C417	Mitochondrial fission process protein 1	MTFP1
1.63081419467926	-0.261337220668793	1.01465570926666	0.794181883335114	-0.873356580734253	-0.790386438369751	-0.560472130775452	-0.954099357128143	Keep	Discard	+	1%_21%	+_Keep	+_Discard	3	3	3	20613	1	-2	68682415	33025835,5	2,07965707778931	2,07965707778931	2,11930920240362	1,58915726840496	3,9430648466931	Q9Y6X6;F8W883;Q9Y6X6-2;Q9Y6X6-4;Q9Y6X6-3	Q9Y6X6;F8W883;Q9Y6X6-2	Unconventional myosin-XVI	MYO16
1.03040421009064	-0.499046385288239	0.983610153198242	1.14962768554688	-0.309146255254745	-1.76730632781982	-0.230086326599121	-0.358056753873825	Keep	Discard	+	1%_21%	+_Keep	+_Discard	8	8	1	19311	0	89595	6164130304	876111540	7,03578233718872	7,03578233718872	1,32332447388539	1,33229783177376	2,48476077321848	E7EQ69;C9JZU6;C9J5J3	E7EQ69;C9JZU6;C9J5J3		NAA50
0.390751451253891	0.32078093290329	1.20167553424835	0.954707145690918	-0.262109160423279	-0.642165899276733	-1.97678327560425	0.0131432339549065	Keep	Discard	+	1%_21%	+_Keep	+_Discard	7	7	7	57578	0	19529	394169520	226134616	1,74307465553284	1,74307465553284	1,5764353305005	1,43395754136145	2,92323374707622	Q6XQN6;G5E977;Q6XQN6-3;Q6XQN6-2;C9J8U2;A0A087WUT5;H0YF31	Q6XQN6;G5E977;Q6XQN6-3;Q6XQN6-2;C9J8U2	Nicotinate phosphoribosyltransferase	NAPRT
0.685280919075012	0.541544318199158	1.46731209754944	0.793620467185974	-0.341886520385742	-0.940932750701904	-1.20533740520477	-0.999601066112518	Keep	Discard	+	1%_21%	+_Keep	+_Discard	11	11	11	78959	0	45487	256450256	114127396	2,24705266952515	2,24705266952515	3,12963511296734	1,74387888610363	6,30578823352784	Q9NZQ3;Q9NZQ3-3;Q9NZQ3-4;Q9NZQ3-2;Q9NZQ3-5;C9JSC3;H7C0T9;C9JMQ4;H7C2K2;C9JC20	Q9NZQ3;Q9NZQ3-3;Q9NZQ3-4;Q9NZQ3-2;Q9NZQ3-5	NCK-interacting protein with SH3 domain	NCKIPSD
0.140814647078514	0.958535552024841	1.26997435092926	0.797379076480865	-1.35202169418335	-1.23958122730255	0.0885068103671074	-0.663607358932495	Keep	Discard	+	1%_21%	+_Keep	+_Discard	15	15	15	10616	0	241	180274504	109284996	1,64958143234253	1,64958143234253	2,09379610965669	1,58335177414119	3,8920557163032	Q8NI08;Q8NI08-2;Q8NI08-7;H0Y6T0;H0Y5F6;Q8NI08-5;Q8NI08-4;Q8NI08-3;Q5TF98;Q5TF97;Q5TF96;Q8NI08-6	Q8NI08;Q8NI08-2;Q8NI08-7	Nuclear receptor coactivator 7	NCOA7
0.68528413772583	1.22225427627563	0.99239706993103	0.46714648604393	-1.09596002101898	-0.534265518188477	-1.51592314243317	-0.220933303236961	Keep	Discard	+	1%_21%	+_Keep	+_Discard	4	4	4	21766	0	3672	736111456	451783392	1,62934601306915	1,62934601306915	2,63382565849935	1,6835409887135	5,05432730522381	O95169;O95169-3;K9J7I2;E9PQ68;O95169-2	O95169;O95169-3;K9J7I2;E9PQ68;O95169-2	NADH dehydrogenase [ubiquinone] 1 beta subcomplex subunit 8, mitochondrial	NDUFB8
0.44143807888031	0.671242237091064	1.15896034240723	1.29604864120483	-0.578350961208344	-1.10699248313904	-0.948255836963654	-0.93408989906311	Keep	Discard	+	1%_21%	+_Keep	+_Discard	17	17	17	52545	0	32331	3033518528	1648379520	1,8403035402298	1,8403035402298	3,6151114100741	1,7838446199894	7,74976349882065	O75306;O75306-2	O75306;O75306-2	NADH dehydrogenase [ubiquinone] iron-sulfur protein 2, mitochondrial	NDUFS2
2.1535120010376	0.460616588592529	-0.148845940828323	0.32100111246109	-0.509211361408234	-0.793658077716827	-0.875073254108429	-0.608341157436371	Keep	Discard	+	1%_21%	+_Keep	+_Discard	3	3	3	20108	15193	50503	1671879488	979955120	1,7060774564743	1,7060774564743	1,46783119013031	1,39314190298319	2,73291579474676	O43181;D6REP1;D6R916;H0Y9M8;D6RI09	O43181	NADH dehydrogenase [ubiquinone] iron-sulfur protein 4, mitochondrial	NDUFS4
0.943370163440704	0.994329988956451	1.25886726379395	-0.533942639827728	0.318780422210693	-0.64254504442215	-1.20025825500488	-1.13860177993774	Keep	Discard	+	1%_21%	+_Keep	+_Discard	4	4	4	12517	0	23812	3755099392	2115908256	1,77469861507416	1,77469861507416	1,32113317104183	1,33131235837936	2,48103600150464	O43920	O43920	NADH dehydrogenase [ubiquinone] iron-sulfur protein 5	NDUFS5
0.356987714767456	0.723308861255646	0.878786325454712	0.769930422306061	0.27840593457222	-2.08544898033142	-0.718574047088623	-0.203396335244179	Keep	Discard	+	1%_21%	+_Keep	+_Discard	7	7	5	34551	0	15067	221524572	108599654	2,03982758522034	2,03982758522034	1,39746670222051	1,36450668796897	2,61142900072942	Q8TDX7;F8WAG2;F5H3U7;Q5TBH0;Q8TDX7-2	Q8TDX7	Serine/threonine-protein kinase Nek7	NEK7
0.746285974979401	0.769065618515015	1.07486414909363	1.05903279781342	-1.10833728313446	-0.924798429012299	-1.11230778694153	-0.503805100917816	Keep	Discard	+	1%_21%	+_Keep	+_Discard	43	43	43	11389	0	32331	4748313216	2952868992	1,60803389549255	1,60803389549255	4,43219138675343	1,82462428510189	10,8161714411702	Q13423;E9PCX7;D6RAI5;D6RHU2;H0Y8P5;D6RCR6	Q13423;E9PCX7	NAD(P) transhydrogenase, mitochondrial	NNT
0.692176043987274	0.709020853042603	1.34295952320099	0.680063128471375	-1.33586251735687	-0.585751116275787	-1.24910318851471	-0.253502786159515	Keep	Discard	+	1%_21%	+_Keep	+_Discard	9	9	9	32162	0	20784	516013552	152415702	3,38556718826294	3,38556718826294	2,84432787061477	1,71210978925228	5,56126075391725	Q96IY1;Q5SY74;Q96IY1-2;Q5SY76	Q96IY1	Kinetochore-associated protein NSL1 homolog	NSL1
0.440307170152664	0.66805225610733	0.85919713973999	1.12906527519226	-0.767175912857056	-0.66644698381424	-1.81418311595917	0.151184260845184	Keep	Discard	+	1%_21%	+_Keep	+_Discard	6	6	6	34389	0	66206	265151388	108002230	2,45505475997925	2,45505475997925	1,95041205079267	1,54831089824438	3,61159091829448	P78549;P78549-3;P78549-2;H3BRL9;H3BPD5;H3BUV2	P78549;P78549-3;P78549-2;H3BRL9;H3BPD5	Endonuclease III-like protein 1	NTHL1
0.77543568611145	-0.0088361045345664	1.53440284729004	0.594030261039734	0.103304751217365	-0.569113492965698	-0.763928532600403	-1.66529536247253	Keep	Discard	+	1%_21%	+_Keep	+_Discard	11	11	11	70537	0	17529	455199384	286825064	1,58702802658081	1,58702802658081	1,61494695816302	1,44751633168198	2,99162974874688	Q9Y5A7;H3BM14;H3BM74;Q9Y5A7-2;C9JRT6;F8WDB6;C9J7X7;H7C5N1;H7C5E1;F8WDL9	Q9Y5A7;H3BM14;H3BM74;Q9Y5A7-2	NEDD8 ultimate buster 1	NUB1
1.22520911693573	0.85678106546402	0.848868191242218	0.735088229179382	-0.706248462200165	-1.04317140579224	-1.1586709022522	-0.757855713367462	Keep	Discard	+	1%_21%	+_Keep	+_Discard	14	10	2	60646	0	22962	195370440	86890880	2,24845719337463	2,24845719337463	4,6903916071651	1,83297327160835	11,9906784498679	Q13153;B3KNX7;H0YCG5;H0YCM0	Q13153;B3KNX7	Serine/threonine-protein kinase PAK 1;Non-specific serine/threonine protein kinase	PAK1
0.855096995830536	0.886781573295593	1.1335037946701	0.725030362606049	-0.47686430811882	-1.00928580760956	-0.748248219490051	-1.36601424217224	Keep	Discard	+	1%_21%	+_Keep	+_Discard	7	7	7	53262	0	18197	133733042	19963643,5	6,69882917404175	6,69882917404175	3,88371278146679	1,80020632594824	8,66029123900501	Q7L3T8	Q7L3T8	Probable proline--tRNA ligase, mitochondrial	PARS2
1.4760684967041	0.268243908882141	-0.168423995375633	1.47821044921875	-0.99003791809082	-0.964000165462494	-0.653123080730438	-0.446937620639801	Keep	Discard	+	1%_21%	+_Keep	+_Discard	5	5	5	30346	15509	56983	344178972	158228296	2,17520499229431	2,17520499229431	1,87118022459434	1,52704941108823	3,46086733234573	Q9BSM1;A0A087WUL5;Q9BSM1-3	Q9BSM1;A0A087WUL5;Q9BSM1-3	Polycomb group RING finger protein 1	PCGF1
0.523300051689148	0.598177433013916	0.891537487506866	0.660908102989197	-0.570553600788116	-0.50669914484024	0.482240587472916	-2.0789110660553	Keep	Discard	+	1%_21%	+_Keep	+_Discard	30	30	30	37803	0	6023	47444150	16484648,25	2,87808108329773	2,87808108329773	1,33375512724526	1,33696157485247	2,50250499933663	O95613;O95613-2;H7C2A3	O95613;O95613-2	Pericentrin	PCNT
1.1183375120163	0.946610331535339	0.486384958028793	0.953963994979858	-1.26173555850983	-0.559505939483643	-1.27997064590454	-0.404084652662277	Keep	Discard	+	1%_21%	+_Keep	+_Discard	19	19	19	51735	0	31367	8644304768	4600012224	1,87919163703918	1,87919163703918	3,22133279122719	1,75264839828014	6,56047144742747	Q53EL6;Q53EL6-2;Q5VZS7	Q53EL6;Q53EL6-2	Programmed cell death protein 4	PDCD4
0.918949604034424	0.80161988735199	0.926760375499725	1.00883162021637	-0.860205352306366	-0.9581218957901	-1.29940569400787	-0.538428604602814	Keep	Discard	+	1%_21%	+_Keep	+_Discard	9	8	8	49244	0	71061	558247120	168981052	3,30360770225525	3,30360770225525	4,53288844739361	1,82808075845242	11,2609869601169	Q15118;Q15118-2;C9JKT3;C9IYB4;F8WEJ6;F8WC75	Q15118;Q15118-2	[Pyruvate dehydrogenase (acetyl-transferring)] kinase isozyme 1, mitochondrial	PDK1
0.825269639492035	0.719393134117126	1.13280189037323	0.992241561412811	-1.03653299808502	-1.07287406921387	-0.566966652870178	-0.993332505226135	Keep	Discard	+	1%_21%	+_Keep	+_Discard	15	15	12	54039	0	23687	745046992	169466476	4,39642667770386	4,39642667770386	4,75642343971665	1,8348531126976	12,3094593983349	Q16877;Q66S35;Q16877-3;Q16877-2;C9K0D8;C9JX77;C9JJ23;Q4VBA9	Q16877;Q66S35;Q16877-3;Q16877-2;C9K0D8	6-phosphofructo-2-kinase/fructose-2,6-bisphosphatase 4;6-phosphofructo-2-kinase;Fructose-2,6-bisphosphatase	PFKFB4
0.622517049312592	0.61267077922821	0.906848669052124	0.626413464546204	-2.21066236495972	-0.142305761575699	-0.327630221843719	-0.0878515690565109	Keep	Discard	+	1%_21%	+_Keep	+_Discard	27	22	22	85018	0	30053	4511710720	1448391432	3,11498022079468	3,11498022079468	1,44543965384288	1,38422496989369	2,69411127319571	P17858;P17858-2;F8WEU2	P17858;P17858-2	ATP-dependent 6-phosphofructokinase, liver type	PFKL
1.16296768188477	0.410114377737045	0.343856543302536	1.00431883335114	-0.805978775024414	-1.91600918769836	-0.176679015159607	-0.0225904695689678	Keep	Discard	+	1%_21%	+_Keep	+_Discard	10	10	10	70209	0	18087	45166140	24565619	1,83859145641327	1,83859145641327	1,65346842084164	1,46062872093171	3,0605572606908	Q96BD5-2;Q96BD5-3;Q96BD5;E9PQM3;E9PLU5;E9PLV4;E9PNN4;E9PNW9;E9PR02;E9PS51;H0YCI1	Q96BD5-2;Q96BD5-3;Q96BD5	PHD finger protein 21A	PHF21A
0.608211576938629	0.545669496059418	1.2873831987381	0.50525426864624	-0.235688835382462	0.226160705089569	-1.47246515750885	-1.46452534198761	Keep	Discard	+	1%_21%	+_Keep	+_Discard	4	4	4	3241	0	62472	200981096	77647146	2,58838987350464	2,58838987350464	1,69183902082393	1,47325929254293	3,12974892151281	Q5SRE7;Q5SRE7-2;G5E9M0;X6RJK6;Q5SRE7-3;H7C3M4;X6RFQ9;X6RCI6;H7C2Q0	Q5SRE7;Q5SRE7-2;G5E9M0;X6RJK6;Q5SRE7-3	Phytanoyl-CoA dioxygenase domain-containing protein 1	PHYHD1
0.811467289924622	0.791520416736603	0.607734560966492	0.759629249572754	-1.2507746219635	-1.18288087844849	-1.17965829372406	0.642962217330933	Keep	Discard	+	1%_21%	+_Keep	+_Discard	22	22	3	70754	0	32331	1506057600	439872988	3,42384648323059	3,42384648323059	1,72925036741323	1,4851757735014	3,1977455240383	Q13492;Q13492-3;Q13492-2;Q13492-5;E9PKP6;E9PLJ8;H0YCY1;E9PK13;E9PJT1;O60641;E5RFU0;E5RHK9;E5RFC6;E5RK51;E5RIJ5;E5RGY9;E9PDG8;O60641-3;O60641-4	Q13492;Q13492-3;Q13492-2;Q13492-5	Phosphatidylinositol-binding clathrin assembly protein	PICALM
0.576301276683807	0.770270586013794	0.971015334129333	1.14335799217224	-0.557979941368103	-0.675601303577423	-1.65036988258362	-0.576994121074677	Keep	Discard	+	1%_21%	+_Keep	+_Discard	13	13	13	18477	0	2124	60713032	28311827	2,14444065093994	2,14444065093994	3,00123121157942	1,73047260940075	5,96204187943097	O00750;F5GWN5	O00750;F5GWN5	Phosphatidylinositol 4-phosphate 3-kinase C2 domain-containing subunit beta	PIK3C2B
0.535323321819305	0.532853901386261	1.66400766372681	-0.00927471276372671	-0.310963541269302	0.156726062297821	-1.63088154792786	-0.937791049480438	Keep	Discard	+	1%_21%	+_Keep	+_Discard	8	8	8	13485	0	96591	29679260,5	16783698,25	1,76833856105804	1,76833856105804	1,39022435509884	1,36145506263711	2,59899816180694	O00562;O00562-2;E9PMZ6;E9PMS0;E9PSD1	O00562;O00562-2	Membrane-associated phosphatidylinositol transfer protein 1	PITPNM1
0.756215393543243	0.189362868666649	1.44592308998108	0.60902464389801	-0.0187030136585236	-1.4259033203125	-0.192006751894951	-1.36391294002533	Keep	Discard	+	1%_21%	+_Keep	+_Discard	3	3	3	21551	1	-2	330895352	132127782	2,50435876846313	2,50435876846313	1,77841934637961	1,50026300549507	3,28794964693413	M0R310;Q9BX97	M0R310;Q9BX97	Plasmalemma vesicle-associated protein	PLVAP
0.989655435085297	1.14473438262939	0.484131008386612	1.01472043991089	-0.799214839935303	-1.06470656394958	-0.651707112789154	-1.11761271953583	Keep	Discard	+	1%_21%	+_Keep	+_Discard	30	30	30	16591	0	31815	316346696	183695640	1,72212398052216	1,72212398052216	4,22545673257924	1,81662062555552	9,9527923266837	P09884;A0A087WU64;A6NMQ1	P09884;A0A087WU64;A6NMQ1	DNA polymerase alpha catalytic subunit;DNA polymerase	POLA1
1.22135746479034	1.04778432846069	-0.238095492124557	1.0026136636734	0.0653582811355591	-1.25309610366821	-0.735511481761932	-1.11041057109833	Keep	Discard	+	1%_21%	+_Keep	+_Discard	12	12	12	514	0	76338	1003546416	590580344	1,69925463199615	1,69925463199615	1,83491700590476	1,5168299600482	3,39282802822135	Q15054;Q15054-2;Q15054-3;E9PRK3;H0YEX7;E9PM91;E9PNC0;H0YD46	Q15054;Q15054-2;Q15054-3	DNA polymerase delta subunit 3	POLD3
0.743550300598145	0.634811103343964	1.36158323287964	0.765914916992188	-0.642455875873566	-0.624358296394348	-1.50317513942719	-0.735870182514191	Keep	Discard	+	1%_21%	+_Keep	+_Discard	11	11	11	34005	0	19958	976194752	559781416	1,74388551712036	1,74388551712036	3,22438872786681	1,75292976200581	6,56909561251007	Q9HAB8;Q9HAB8-2;Q5VVM3;Q5VVM2	Q9HAB8;Q9HAB8-2	Phosphopantothenate--cysteine ligase	PPCS
0.855238735675812	0.487344175577164	1.04926788806915	0.722243189811707	-0.397096306085587	-1.99788010120392	-0.34100329875946	-0.378114402294159	Keep	Discard	+	1%_21%	+_Keep	+_Discard	23	23	4	98543	0	15516	384337472	206473508	1,86143720149994	1,86143720149994	1,98457356063123	1,55704702436924	3,67748598732229	Q8ND30;E9PP16;Q8ND30-3;E9PIK8;E9PMH3;E9PJA0;E9PK17;H0YDM0;H0YDJ2;E9PMN3;H0YET1;F5GZP6;E9PI79;H0YFE4	Q8ND30;E9PP16;Q8ND30-3	Liprin-beta-2	PPFIBP2
0.871894299983978	0.823992431163788	0.57729297876358	1.16425955295563	-1.2935084104538	-0.0543351322412491	-0.964960515499115	-1.12463521957397	Keep	Discard	+	1%_21%	+_Keep	+_Discard	13	13	9	41564	0	13487	539495312	230234196	2,3432457447052	2,3432457447052	2,89856310533854	1,71871963515878	5,69748496388216	Q15435;H7C003;C9JD73;Q15435-2;Q15435-3;B5MBZ8;C9J177;Q15435-5;Q15435-4;C9JRC4;H7C3Q5	Q15435;H7C003;C9JD73;Q15435-2;Q15435-3;B5MBZ8;C9J177	Protein phosphatase 1 regulatory subunit 7	PPP1R7
1.22648954391479	0.860845446586609	0.960445642471313	0.333431869745255	-0.950280010700226	-0.370251506567001	-0.502271175384521	-1.55840981006622	Keep	Discard	+	1%_21%	+_Keep	+_Discard	25	25	23	60103	0	32331	7397738624	4609920832	1,60474300384521	1,60474300384521	2,68265332599523	1,69060625135899	5,1689362273854	O75475;O75475-2;O75475-3	O75475;O75475-2;O75475-3	PC4 and SFRS1-interacting protein	PSIP1
0.483122378587723	0.198077008128166	1.23317408561707	0.820915520191193	0.545575857162476	-1.72599935531616	-0.62379789352417	-0.931067585945129	Keep	Discard	+	1%_21%	+_Keep	+_Discard	10	1	1	22842	1	-2	3042831776	1305330936	2,33108067512512	2,33108067512512	1,40496349104012	1,36764449253678	2,6243104406525	G3V295	G3V295	Proteasome subunit alpha type	PSMA6
-0.46825322508812	1.03269422054291	1.08623611927032	1.02631080150604	-0.340943902730942	-1.79372835159302	-0.258884727954865	-0.283430933952332	Keep	Discard	+	1%_21%	+_Keep	+_Discard	13	13	13	2848	0	29876	7101981088	886706616	8,00939273834229	8,00939273834229	1,33720432871283	1,33849395811558	2,50837788554706	P28074;P28074-3;P28074-2;H0YJM8;G8JLC2;G3V3K3	P28074;P28074-3;P28074-2	Proteasome subunit beta type-5	PSMB5
0.739317834377289	0.941744029521942	0.775405645370483	0.852766990661621	-1.88763523101807	-0.446206659078598	-0.480657607316971	-0.494734972715378	Keep	Discard	+	1%_21%	+_Keep	+_Discard	24	24	24	49184	0	32331	7371118848	854660804	8,62461280822754	8,62461280822754	2,45195036372757	1,65461724251509	4,64223196095123	P62191;P62191-2;G3V4X1	P62191;P62191-2	26S protease regulatory subunit 4	PSMC1
0.802465558052063	0.791464745998383	0.553805887699127	0.530537486076355	0.91493958234787	-1.17898416519165	-1.20031976699829	-1.21390926837921	Keep	Discard	+	1%_21%	+_Keep	+_Discard	25	25	1	47352	0	32331	7400574080	3141329840	2,35587286949158	2,35587286949158	1,33865451230211	1,3391368240118	2,51084787049619	R4GNH3;E9PN50	R4GNH3;E9PN50		PSMC3
0.76109117269516	0.934994041919708	0.987984120845795	1.00571060180664	-1.120032787323	-0.740426421165466	-0.710886120796204	-1.11843466758728	Keep	Discard	+	1%_21%	+_Keep	+_Discard	5	5	5	24906	0	3323	422441624	149657962	2,82271385192871	2,82271385192871	5,18084411930666	1,84488998353481	14,5562840145597	Q9P2W1;Q9P2W1-2;K7ELD8;K7EK12;K7EQS1;K7ERB6;Q9P2W1-3	Q9P2W1;Q9P2W1-2;K7ELD8;K7EK12;K7EQS1	Homologous-pairing protein 2 homolog	PSMC3IP
1.053218126297	1.03123605251312	1.00688338279724	-0.127299100160599	-0.111708581447601	-1.35047316551208	-0.105474703013897	-1.39638209342957	Keep	Discard	+	1%_21%	+_Keep	+_Discard	26	26	26	47463	0	32331	7318096416	649176392	11,2728939056396	11,2728939056396	1,71922208457394	1,48201925121248	3,17946574800823	O00231;O00231-2;J3QRY4;J3QS13;J3KSW3	O00231;O00231-2	26S proteasome non-ATPase regulatory subunit 11	PSMD11
0.639725148677826	0.553539872169495	0.805905938148499	0.716726303100586	-1.20817124843597	-1.19598138332367	0.888762295246124	-1.2005068063736	Keep	Discard	+	1%_21%	+_Keep	+_Discard	16	16	16	42945	0	32331	7781576320	3218638288	2,41766095161438	2,41766095161438	1,38196063380892	1,35794860124588	2,58483008163092	Q9UNM6;A0A087WUL9;Q9UNM6-2;J3KNQ3;E9PL38;H0YD73;E9PQG3;E9PPD2;F8W8J6	Q9UNM6;A0A087WUL9;Q9UNM6-2;J3KNQ3;E9PL38	26S proteasome non-ATPase regulatory subunit 13	PSMD13
1.20476269721985	0.73077392578125	1.09227728843689	0.496991574764252	-0.388647884130478	-1.35577619075775	-0.876203238964081	-0.904178023338318	Keep	Discard	+	1%_21%	+_Keep	+_Discard	2	2	2	39203	16689	85776	286794420	78688166	3,64469575881958	3,64469575881958	3,33183290273609	1,76240270584822	6,87808410825171	P25105	P25105	Platelet-activating factor receptor	PTAFR
1.27906405925751	0.236676633358002	1.13830053806305	0.893057644367218	-0.820844113826752	-0.709326028823853	-0.965046226978302	-1.05188250541687	Keep	Discard	+	1%_21%	+_Keep	+_Discard	6	6	6	57157	0	18436	513445136	340730464	1,5068953037262	1,5068953037262	3,47119356308855	1,77354943752289	7,29620464028827	Q15223;Q15223-3;Q15223-2	Q15223;Q15223-3;Q15223-2	Nectin-1	PVRL1
0.704875707626343	0.439516663551331	1.27775776386261	1.04883062839508	-0.356139957904816	-0.703071355819702	-1.05128228664398	-1.36048722267151	Keep	Discard	+	1%_21%	+_Keep	+_Discard	5	4	3	24984	0	31584	165223572	77674091	2,12713885307312	2,12713885307312	3,04776581586208	1,73549039661884	6,0849269803481	P20336;M0R257;S4R3Q3	P20336;M0R257	Ras-related protein Rab-3A	RAB3A
0.983509302139282	-0.2049310952425	1.17547416687012	0.726012885570526	-0.336989104747772	0.372981071472168	-1.62328159809113	-1.0927757024765	Keep	Discard	+	1%_21%	+_Keep	+_Discard	11	11	11	16277	0	18721	30101061	19425553	1,54956007003784	1,54956007003784	1,34067848921074	1,34003264829516	2,51429593535113	Q9Y4B4;H0Y760	Q9Y4B4;H0Y760	Helicase ARIP4	RAD54L2
0.960582375526428	0.513320684432983	1.3899382352829	0.52098548412323	-1.25434494018555	-0.39156448841095	-1.3006249666214	-0.438292324542999	Keep	Discard	+	1%_21%	+_Keep	+_Discard	5	1	1	20615	25801	24159	107790934	57634237	1,87025880813599	1,87025880813599	2,69545768397396	1,69241337478161	5,19928111356023	P10114;F6U784	P10114;F6U784	Ras-related protein Rap-2a	RAP2A
0.297755420207977	0.671490669250488	0.756813406944275	0.958971560001373	-1.88953840732574	0.535709500312805	-1.00075721740723	-0.330444931983948	Keep	Discard	+	1%_21%	+_Keep	+_Discard	7	7	7	42455	0	10863	134578230	46742139,75	2,87916254997253	2,87916254997253	1,34630789393095	1,34251552820206	2,52389106504773	Q92546	Q92546	RAB6A-GEF complex partner protein 2	RGP1
0.6793412566185	1.12335002422333	1.03500962257385	0.839969336986542	-0.802451074123383	-1.118616938591	-0.702616930007935	-1.05398523807526	Keep	Discard	+	1%_21%	+_Keep	+_Discard	10	10	10	1586	0	44232	7985277824	1430383872	5,58261203765869	5,58261203765869	4,90855891257488	1,83883510529995	13,0743299731648	P62910;D3YTB1;F8W727;D3YTI8	P62910;D3YTB1;F8W727	60S ribosomal protein L32	RPL32
1.18567788600922	-0.860718727111816	1.1808032989502	1.24894940853119	-0.688081920146942	-0.683144509792328	-0.660110533237457	-0.723374843597412	Keep	Discard	+	1%_21%	+_Keep	+_Discard	26	26	3	26688	0	26589	7035280496	1095913632	6,41955757141113	6,41955757141113	1,42849180945811	1,37735591828823	2,66483208869608	P23396;P23396-2;E9PL09;E9PPU1;H0YCJ7;H0YF32;H0YEU2;E9PQ96;E9PJH4;E9PK82;E9PQX2;H0YES8	P23396;P23396-2;E9PL09;E9PPU1;H0YCJ7;H0YF32;H0YEU2	40S ribosomal protein S3	RPS3
0.24542161822319	0.919664800167084	1.09261226654053	0.667105913162231	-0.17483751475811	-2.03197860717773	-0.221345826983452	-0.496642738580704	Keep	Discard	+	1%_21%	+_Keep	+_Discard	7	6	5	59139	0	61312	172491044	112484632	1,53346312046051	1,53346312046051	1,65877972655366	1,46240232139826	3,07010255544146	P23443;P23443-2;P23443-4;P23443-3;P23443-5;K7EIM2	P23443;P23443-2;P23443-4;P23443-3;P23443-5	Ribosomal protein S6 kinase beta-1	RPS6KB1
0.495161056518555	0.387461096048355	1.74797809123993	0.417365878820419	-1.59828615188599	-0.695903718471527	-0.215367302298546	-0.538408935070038	Keep	Discard	+	1%_21%	+_Keep	+_Discard	9	9	9	10834	0	62018	1744344304	107194166,5	16,2727546691895	16,2727546691895	1,86018115705917	1,52398305758834	3,44016907317879	P05109	P05109	Protein S100-A8;Protein S100-A8, N-terminally processed	S100A8
0.706510365009308	0.95279335975647	0.850050151348114	1.07448971271515	-0.733197510242462	-0.874365031719208	-0.508047878742218	-1.4682332277298	Keep	Discard	+	1%_21%	+_Keep	+_Discard	21	21	21	58777	0	32331	8157493632	4650389440	1,75415277481079	1,75415277481079	3,74065833745481	1,79192180931568	8,16457649906259	P49591;Q5T5C7	P49591;Q5T5C7	Serine--tRNA ligase, cytoplasmic	SARS
0.693829476833344	0.650611817836761	0.740933895111084	0.680103182792664	-1.2543808221817	-1.14809393882751	-1.21259462833405	0.849591016769409	Keep	Discard	+	1%_21%	+_Keep	+_Discard	32	32	10	10993	0	32331	1432217216	548256592	2,61231207847595	2,61231207847595	1,44175185993362	1,38273918628693	2,68773361289251	Q15020;Q15020-4;Q15020-2;F8W667;H0YHU8;F8VVK9;F8VZM2;Q15020-3	Q15020;Q15020-4	Squamous cell carcinoma antigen recognized by T-cells 3	SART3
0.736520290374756	0.641680836677551	1.08129680156708	1.08830285072327	-1.42934262752533	-0.846166133880615	-0.884939789772034	-0.387352287769318	Keep	Discard	+	1%_21%	+_Keep	+_Discard	7	7	7	48148	0	18263	116091012	22638108,75	5,12812328338623	5,12812328338623	3,47584085628076	1,77390040457249	7,31049791529287	Q96I15;A0A0A0MQU4;H7C3V9;H7C277;Q96I15-2;H7C1N7;H7C1S7;H7C4A1;H7C280;C9JNL5	Q96I15;A0A0A0MQU4;H7C3V9;H7C277;Q96I15-2	Selenocysteine lyase	SCLY
0.786462545394897	0.649558186531067	0.682968974113464	0.57284015417099	-1.58531475067139	0.266444355249405	0.218571096658707	-1.59153056144714	Keep	Discard	+	1%_21%	+_Keep	+_Discard	21	21	21	72691	0	32331	3403713344	1168513140	2,91285824775696	2,91285824775696	1,35406242214658	1,34591493010521	2,53712015468638	P31040;A0A087X1I3;D6RFM5;P31040-3;P31040-2;H0Y8X1;H0Y8S2	P31040;A0A087X1I3;D6RFM5;P31040-3;P31040-2	Succinate dehydrogenase [ubiquinone] flavoprotein subunit, mitochondrial	SDHA
1.06721913814545	1.00041854381561	0.648059546947479	0.978209793567657	-0.96301406621933	-0.974738657474518	-1.05665481090546	-0.699499428272247	Keep	Discard	+	1%_21%	+_Keep	+_Discard	9	9	3	31629	0	72987	2822639616	1681393760	1,67874991893768	1,67874991893768	5,2884879134937	1,84695349633694	15,1850505647365	P21912	P21912	Succinate dehydrogenase [ubiquinone] iron-sulfur subunit, mitochondrial	SDHB
1.27460443973541	1.03972220420837	0.0463262908160686	0.991321682929993	-0.692191541194916	-0.452569127082825	-1.41154503822327	-0.79566901922226	Keep	Discard	+	1%_21%	+_Keep	+_Discard	15	15	1	81249	0	10096	396830508	145569974	2,72604656219482	2,72604656219482	2,58367382182017	1,67598733585328	4,93840202412391	Q92503;Q92503-2;K7EJ08;K7ELU0;K7ERB3;K7ESI4;K7EQK4;K7EIJ7;D5G3K4;K7EJJ2;K7EPE4	Q92503;Q92503-2;K7EJ08	SEC14-like protein 1	SEC14L1
0.850498855113983	0.745418727397919	1.10700523853302	1.01208972930908	-0.951122224330902	-0.817714154720306	-0.927670955657959	-1.01850521564484	Keep	Discard	+	1%_21%	+_Keep	+_Discard	22	22	22	73125	0	1958	885073456	117276730	7,5468807220459	7,5468807220459	6,04673784712118	1,857506275177	20,4153747776135	Q96B97;Q96B97-2;Q5JPT2;Q96B97-3;Q5VSN0;Q5JPT1;Q5JPT3	Q96B97;Q96B97-2;Q5JPT2;Q96B97-3;Q5VSN0	SH3 domain-containing kinase-binding protein 1	SH3KBP1
0.246501430869102	0.583633184432983	1.33905446529388	0.7137730717659	-2.00533199310303	-0.265584886074066	-0.214156195521355	-0.397889018058777	Keep	Discard	+	1%_21%	+_Keep	+_Discard	5	5	5	19308	23275	25736	13620371,5	4909810	2,77411389350891	2,77411389350891	1,59764382795724	1,44148106127977	2,96083751139016	Q149N8;A0A0D9SFM0;Q149N8-4;Q149N8-2;H0YBI0;H7C2W2;K4DI94;Q149N8-5	Q149N8;A0A0D9SFM0;Q149N8-4;Q149N8-2	E3 ubiquitin-protein ligase SHPRH	SHPRH
0.703652381896973	0.870407223701477	0.946608185768127	0.871973216533661	-0.606015622615814	-0.562675476074219	-1.79535818099976	-0.428591638803482	Keep	Discard	+	1%_21%	+_Keep	+_Discard	8	8	8	49469	0	16937	483457032	48581876	9,95138645172119	9,95138645172119	2,72360314811257	1,69632048159838	5,2664132010466	O15427;J3QQV2;J3QSC3;J3QQS9;J3KTI8;J3KT83;J3QRA0;J3QLE3;J3KTM6;J3QRU2;J3QRP8	O15427;J3QQV2;J3QSC3;J3QQS9;J3KTI8	Monocarboxylate transporter 4	SLC16A3
-0.23099684715271	1.03491294384003	1.32798230648041	1.00671207904816	-1.26087129116058	-1.06619298458099	-0.259619385004044	-0.551926791667938	Keep	Discard	+	1%_21%	+_Keep	+_Discard	2	2	2	44592	18013	28014	63093245	40644924	1,55230319499969	1,55230319499969	2,03422918547495	1,56930523365736	3,77428623952881	Q9H1N7;Q9H1N7-2;Q9H1N7-3	Q9H1N7;Q9H1N7-2;Q9H1N7-3	Adenosine 3-phospho 5-phosphosulfate transporter 2	SLC35B3
0.660840690135956	0.495765447616577	0.75516152381897	0.802500307559967	-1.76973986625671	-0.86009818315506	0.741340517997742	-0.825770318508148	Keep	Discard	+	1%_21%	+_Keep	+_Discard	16	16	16	16046	0	17789	406206160	142328316,5	2,85400795936584	2,85400795936584	1,38004954867142	1,35713395476341	2,58155592143797	Q86US8;Q86US8-3;Q86US8-2;K7ENH7;I3L3A9;I3L355;K7ELM2;K7EKV2;I3L176;I3L421;I3L1W8;I3L390	Q86US8	Telomerase-binding protein EST1A	SMG6
0.755700588226318	0.697903692722321	0.391089797019958	0.822053849697113	-1.57632911205292	0.226420253515244	-1.58308470249176	0.266245514154434	Keep	Discard	+	1%_21%	+_Keep	+_Discard	10	10	10	1246	0	25662	87873114	27368168,75	3,21077799797058	3,21077799797058	1,32572258158189	1,33337399363518	2,48883825302484	Q69YQ0;C9J8U1;F8WAN1;Q69YQ0-2;C9JLY8	Q69YQ0;C9J8U1;F8WAN1;Q69YQ0-2	Cytospin-A	SPECC1L;SPECC1L-ADORA2A
0.95767879486084	0.880715429782867	1.09902966022491	0.757563948631287	-0.685851037502289	-0.860511898994446	-1.13023793697357	-1.01838707923889	Keep	Discard	+	1%_21%	+_Keep	+_Discard	10	10	10	1457	0	32331	2921700864	1346580480	2,16971874237061	2,16971874237061	5,31822375137358	1,84749394655228	15,3632628855356	P37108;H0YLA2	P37108;H0YLA2	Signal recognition particle 14 kDa protein	SRP14
1.04867553710938	0.861469089984894	0.57695209980011	0.939963042736053	-1.65228736400604	-0.450694680213928	-0.405157178640366	-0.918920576572418	Keep	Discard	+	1%_21%	+_Keep	+_Discard	7	5	5	56678	0	12096	1439957088	921891200	1,56195998191833	1,56195998191833	2,85578249005792	1,7135298922658	5,58983304831669	Q08170;A0A0D9SEM4;S4R2X6	Q08170;A0A0D9SEM4	Serine/arginine-rich splicing factor 4	SRSF4
1.23149299621582	1.21368324756622	1.17440831661224	-0.801513373851776	-0.660527229309082	-0.731832504272461	-0.696459114551544	-0.729252398014069	Keep	Discard	+	1%_21%	+_Keep	+_Discard	15	15	15	41331	0	13747	7505539456	1098895968	6,83007287979126	6,83007287979126	1,50888713139645	1,40903560817242	2,80443864343389	P50502;Q8NFI4;Q3KNR6;A0A087X1H6;Q8IZP2;F6VDH7;H7C3I1;F8WAQ7	P50502;Q8NFI4;Q3KNR6;A0A087X1H6	Hsc70-interacting protein;Putative protein FAM10A5	ST13;ST13P5
1.0310183763504	0.958226919174194	0.67699533700943	0.867343068122864	-0.50427383184433	-1.57678771018982	-0.806053221225739	-0.646468937397003	Keep	Discard	+	1%_21%	+_Keep	+_Discard	10	10	10	94769	0	52168	522166608	294328528	1,77409446239471	1,77409446239471	3,38489251526	1,76679185032845	7,0349136449928	Q9Y5Y6	Q9Y5Y6	Suppressor of tumorigenicity 14 protein	ST14
0.437571108341217	0.389103293418884	1.18749666213989	0.901565670967102	0.270276516675949	-1.57376313209534	-1.34682202339172	-0.265428155660629	Keep	Discard	+	1%_21%	+_Keep	+_Discard	9	9	9	5783	0	86842	64894755,5	8924255,75	7,27172708511353	7,27172708511353	1,64525067351052	1,45786838233471	3,04580871638837	Q9BYT3;B4DDH2;Q9BYT3-2;H0YEZ7;C9J319;F8WAK5;C9JCS6;C9J6X7;A0A0C4DH60	Q9BYT3;B4DDH2;Q9BYT3-2;H0YEZ7;C9J319;F8WAK5	Serine/threonine-protein kinase 33	STK33
0.634892642498016	0.356265366077423	1.1706930398941	1.36835312843323	-1.08044934272766	-0.680676937103271	-1.01016426086426	-0.758913815021515	Keep	Discard	+	1%_21%	+_Keep	+_Discard	19	19	15	54002	0	51408	2549120832	1186889984	2,1477313041687	2,1477313041687	3,36420149661526	1,76510213315487	6,97341634096622	Q9Y2H1;Q9Y2H1-2;F5GY51;I3L0D0;F5H7Z3;F5H277;F5H0V1;H0YGN4	Q9Y2H1;Q9Y2H1-2	Serine/threonine-protein kinase 38-like	STK38L
0.937726259231567	0.934484660625458	0.864297330379486	1.00191557407379	-0.950744688510895	-0.934186398983002	-0.960106134414673	-0.893386542797089	Keep	Discard	+	1%_21%	+_Keep	+_Discard	5	5	5	11557	0	11059	9242213632	1120773760	8,24627876281738	8,24627876281738	8,79249867211325	1,86921189725399	58,8805496866062	P63165;B8ZZN6;P63165-2;B8ZZ67;B8ZZJ0;B9A032	P63165;B8ZZN6;P63165-2;B8ZZ67	Small ubiquitin-related modifier 1	SUMO1
0.563999533653259	-0.0112070310860872	1.26801586151123	1.06672883033752	-0.471403300762177	-0.686756253242493	-1.79924094676971	0.0698633417487144	Keep	Discard	+	1%_21%	+_Keep	+_Discard	12	11	11	72727	0	31032	312501984	186479730	1,6757960319519	1,6757960319519	1,60417135415617	1,4437685883604	2,97244169077857	Q9HA65;Q9HA65-3;Q9HA65-2;M0QYC9;M0R2L2;M0QXA2;A0A087WXG5	Q9HA65;Q9HA65-3;Q9HA65-2;M0QYC9;M0R2L2	TBC1 domain family member 17	TBC1D17
1.30777060985565	0.371954202651978	0.632988929748535	0.842868387699127	0.069490447640419	-1.50097799301147	-0.477164834737778	-1.24692976474762	Keep	Discard	+	1%_21%	+_Keep	+_Discard	4	4	4	10988	0	15041	53485491	25264774,5	2,11699867248535	2,11699867248535	2,06985831098472	1,57779106870294	3,84450802778704	Q9UPU7;Q9UPU7-2;C9JW56	Q9UPU7;Q9UPU7-2;C9JW56	TBC1 domain family member 2B	TBC1D2B
0.494945168495178	0.168036684393883	1.19684302806854	1.04051685333252	0.500739097595215	-0.870993375778198	-1.29370856285095	-1.23637902736664	Keep	Discard	+	1%_21%	+_Keep	+_Discard	11	1	1	27161	1	-2	71507434	30184497,5	2,36901187896729	2,36901187896729	1,62264165027591	1,45017090067267	3,00535623572797	Q9Y4G6	Q9Y4G6	Talin-2	TLN2
0.984851539134979	1.41382741928101	0.105318866670132	0.32872200012207	-1.15876805782318	-1.5198221206665	-0.428866267204285	0.274736523628235	Keep	Discard	+	1%_21%	+_Keep	+_Discard	3	3	3	23781	0	14909	245733956	124704786	1,97052550315857	1,97052550315857	1,52832361720715	1,41635993681848	2,83847412523976	E9PS18;E9PLS9;O76062;H0YEN6;E9PK81;H0YDY5;E9PQZ7;E9PP79;E9PLL1;E9PRQ1;E9PS09;E9PLI3;O76062-2	E9PS18;E9PLS9;O76062;H0YEN6	Delta(14)-sterol reductase	TM7SF2
0.577158689498901	0.0271347090601921	1.06696951389313	1.0873955488205	-0.763903260231018	-0.493600338697433	0.342897802591324	-1.84405267238617	Keep	Discard	+	1%_21%	+_Keep	+_Discard	12	12	12	7266	0	39164	167789114	86111093	1,94851911067963	1,94851911067963	1,43333414356517	1,379329232499	2,67318984656415	Q03169;H0YLC0	Q03169	Tumor necrosis factor alpha-induced protein 2	TNFAIP2
0.313704431056976	0.911155223846436	0.708536922931671	0.752521991729736	0.179195895791054	0.113543123006821	-2.00014591217041	-0.9785116314888	Keep	Discard	+	1%_21%	+_Keep	+_Discard	3	3	3	21054	16507	80678	394102544	83109647,25	4,74195861816406	4,74195861816406	1,34731699534651	1,34295927360654	2,52561179947992	O14683;E9PN66;E9PKN9;E9PS55;E9PMW4;E9PQ46;E9PIN5;E9PIK4;U3KQ32;E9PKZ4;E9PPM1;E9PNB3;E9PMY0	O14683;E9PN66;E9PKN9;E9PS55;E9PMW4;E9PQ46;E9PIN5;E9PIK4;U3KQ32;E9PKZ4;E9PPM1;E9PNB3;E9PMY0	Tumor protein p53-inducible protein 11	TP53I11
0.883848965167999	1.18033385276794	0.896939396858215	0.737007677555084	-0.831630766391754	-1.06749367713928	-1.01904273033142	-0.779962718486786	Keep	Discard	+	1%_21%	+_Keep	+_Discard	13	13	13	33429	0	92783	1374911456	361790328	3,80029916763306	3,80029916763306	5,40875790173384	1,84906494617462	15,9182633122613	Q16762;B1AH48	Q16762	Thiosulfate sulfurtransferase	TST
0.737999260425568	0.709038376808167	0.919697821140289	0.623414754867554	-2.09237456321716	-0.484362840652466	-0.306800037622452	-0.106612719595432	Keep	Discard	+	1%_21%	+_Keep	+_Discard	6	1	1	17834	1	-2	5225873280	2613834944	1,99931263923645	1,99931263923645	1,76127616557217	1,49507509358227	3,25638874041141	M0QYM7	M0QYM7		TUBB4A
0.994026899337769	0.666793942451477	-0.0585858002305031	1.47141110897064	-0.854723393917084	-0.327214598655701	-0.324600368738174	-1.56710767745972	Keep	Discard	+	1%_21%	+_Keep	+_Discard	6	1	1	12585	72067	36233	1884984352	1191650912	1,5818258523941	1,5818258523941	1,90694185252713	1,53682304732502	3,52853955775959	K7ES63;K7EK43	K7ES63		TUBB6
0.0299324151128531	0.72793048620224	1.23557674884796	1.39832973480225	-1.09770655632019	-0.665041983127594	-0.895597636699677	-0.733423233032227	Keep	Discard	+	1%_21%	+_Keep	+_Discard	9	9	9	76088	0	5629	144098868	63669175	2,26324367523193	2,26324367523193	2,72043223453538	1,69588469853625	5,25882022291151	Q9UGJ1;Q9UGJ1-2;H3BPU4;H3BS59;H3BQ12;H3BN56;H3BNL9	Q9UGJ1;Q9UGJ1-2;H3BPU4	Gamma-tubulin complex component 4	TUBGCP4
0.72837221622467	0.67749959230423	0.652572572231293	0.665506303310394	-0.731535792350769	-1.93534290790558	-0.684048593044281	0.626976490020752	Keep	Discard	+	1%_21%	+_Keep	+_Discard	30	30	30	11797	0	28291	1594343584	428737517,25	3,71869397163391	3,71869397163391	1,39145580022237	1,36197537183762	2,60111090531839	A0AVT1;A0AVT1-2;H0Y8S8;A0AVT1-3;A0AVT1-4;H0Y9U5	A0AVT1;A0AVT1-2	Ubiquitin-like modifier-activating enzyme 6	UBA6
0.796030759811401	0.640389263629913	0.726200044155121	0.79666793346405	-1.20651507377625	-1.14394414424896	0.655941665172577	-1.26477026939392	Keep	Discard	+	1%_21%	+_Keep	+_Discard	7	7	7	56777	0	24509	1084451952	316951566	3,42150712013245	3,42150712013245	1,71173267766002	1,47964395582676	3,16583937105125	Q92575;F8WB86;Q6PJ80;C9JLR4	Q92575	UBX domain-containing protein 4	UBXN4
1.12346982955933	0.645587742328644	0.820240020751953	0.802055478096008	-0.486468106508255	-1.08690285682678	-1.59251379966736	-0.225468188524246	Keep	Discard	+	1%_21%	+_Keep	+_Discard	13	13	13	89984	0	49023	481734176	207401180	2,32271671295166	2,32271671295166	2,71892026786644	1,69567650556564	5,25520238314364	Q96PU4;Q96PU4-2;A0A0A0MSQ3;B1AL33	Q96PU4;Q96PU4-2	E3 ubiquitin-protein ligase UHRF2	UHRF2
1.33988261222839	0.316051840782166	0.976125538349152	0.375300526618958	-0.255443572998047	-0.690306842327118	-1.85064077377319	-0.210969403386116	Keep	Discard	+	1%_21%	+_Keep	+_Discard	9	9	9	34645	0	61717	1061408160	675851320	1,57047581672668	1,57047581672668	1,78985111698241	1,50368027761579	3,30906273978595	P13051;P13051-2;F5GYA2;Q68DM5	P13051;P13051-2;F5GYA2	Uracil-DNA glycosylase	UNG
0.693792879581451	0.878602981567383	0.787621557712555	0.376496255397797	-0.0848541855812073	-1.46119773387909	-1.62811827659607	0.437656462192535	Keep	Discard	+	1%_21%	+_Keep	+_Discard	6	6	6	29371	0	11346	203009924	64280323,75	3,15819692611694	3,15819692611694	1,406432336294	1,36825685203075	2,62683597064454	Q9NZ43;G8JLK1;M0QZE0;Q9NZ43-3;Q9NZ43-2;M0QYT5;M0QZZ6	Q9NZ43;G8JLK1;M0QZE0;Q9NZ43-3;Q9NZ43-2;M0QYT5	Vesicle transport protein USE1	USE1
0.577983856201172	0.691450953483582	0.595137178897858	0.856705188751221	0.877037882804871	-1.18417406082153	-1.29132103919983	-1.12282001972198	Keep	Discard	+	1%_21%	+_Keep	+_Discard	7	7	7	11438	0	31792	8136230272	3317910512	2,45221519470215	2,45221519470215	1,38829458558803	1,36063860356808	2,59568808476486	Q9BV40;B8ZZT4;C9JXZ5	Q9BV40;B8ZZT4	Vesicle-associated membrane protein 8	VAMP8
0.681962847709656	0.680769681930542	0.730608105659485	0.736362636089325	-2.2058117389679	-0.214306995272636	-0.209696590900421	-0.199887827038765	Keep	Discard	+	1%_21%	+_Keep	+_Discard	53	53	53	14047	0	32331	9043512832	835776773,75	10,8204889297485	10,8204889297485	1,52429358938278	1,41485160589218	2,83140756785322	P26640;P26640-2;H0Y426;A2ABF4;A0A0G2JJT9	P26640	Valine--tRNA ligase	VARS
1.70140850543976	0.654659152030945	-0.153153926134109	0.832052946090698	-1.12838864326477	-0.694867372512817	-1.09095287322998	-0.120757788419724	Keep	Discard	+	1%_21%	+_Keep	+_Discard	2	2	2	30947	43567	38194	92827473	46059467	2,01538300514221	2,01538300514221	1,83720222629203	1,51748333871365	3,39709873177906	Q14135;G5E9M7;G5E9M9;A0A075B6E4;A0A0A6YYI5;Q14135-5;Q14135-6;Q14135-2;Q14135-4;F8W708;E7ERW0;E7EQU6;E7EWF5	Q14135;G5E9M7;G5E9M9;A0A075B6E4;A0A0A6YYI5;Q14135-5;Q14135-6;Q14135-2;Q14135-4;F8W708;E7ERW0;E7EQU6;E7EWF5	Transcription cofactor vestigial-like protein 4	VGLL4
0.804612338542938	0.753490567207336	0.72520524263382	0.694248557090759	-0.555919945240021	-2.05943131446838	-0.46486884355545	0.102663427591324	Keep	Discard	+	1%_21%	+_Keep	+_Discard	5	5	5	43214	0	13026	70913954	13227218,5	5,36121463775635	5,36121463775635	1,74080307366872	1,48877834528685	3,21885294292782	Q96FK6;G3V4B8	Q96FK6;G3V4B8	WD repeat-containing protein 89	WDR89
0.439141839742661	0.68229603767395	0.816999673843384	1.44033241271973	-0.144257307052612	-0.987356126308441	-0.92477935552597	-1.32237720489502	Keep	Discard	+	1%_21%	+_Keep	+_Discard	23	23	23	92306	0	14477	420332584	263825416	1,59322249889374	1,59322249889374	2,67407418584339	1,68938498944044	5,14867258551851	Q9Y6X8;H0YKA3;Q9H4I2;H0Y6F5;Q9H4I2-2	Q9Y6X8	Zinc fingers and homeoboxes protein 2	ZHX2
0.956863522529602	1.29925298690796	1.08552813529968	-0.540698289871216	0.111735239624977	-0.752461731433868	-0.997436046600342	-1.16278374195099	Keep	Discard	+	1%_21%	+_Keep	+_Discard	3	3	3	11953	98996	31896	186312886	88034362	2,11636543273926	2,11636543273926	1,48658251442329	1,40047315880656	2,76552099881843	Q9C0D4	Q9C0D4	Zinc finger protein 518B	ZNF518B
1.03956580162048	1.07562685012817	0.451352953910828	0.463689357042313	0.363580256700516	-1.49495613574982	-1.24412035942078	-0.654738664627075	Keep	Discard	+	1%_21%	+_Keep	+_Discard	11	11	11	54271	0	47983	276686184	70690042	3,91407585144043	3,91407585144043	1,82894858912707	1,51511746644974	3,38168466813135	Q969S3	Q969S3	Zinc finger protein 622	ZNF622
0.789663016796112	1.37858307361603	0.680745840072632	0.507232189178467	-1.2121330499649	-0.669817805290222	-0.124528162181377	-1.3497451543808	Keep	Discard	+	1%_21%	+_Keep	+_Discard	46	46	23	22062	0	32331	420902840	259640316	1,62109971046448	1,62109971046448	2,59757598075034	1,67811207287014	4,97035743036359	Q14966;Q14966-3;Q14966-4;A0A096LPH6;Q14966-2;C9JWN0;A0A096LNS4;A0A096LPK8;A0A096LNR2;A0A096LNX0;A0A096LPI0;A0A096LPB4	Q14966;Q14966-3;Q14966-4	Zinc finger protein 638	ZNF638

## Sheet: Ri-1 down-regulated 1%
Column1	Column2	Column3	Column4	Column5	Column6	Column7	Column8	Column9	Column10	Column11	Column12	Column13	Column14	Column15	Column16	Column17	Column18	Column19	Column20	Column21	Column22	Column23	Column23A	Column24	Column25	Column26	Column27	Column28	Column29	Column30
Ri-1 1%.1	Ri-1 1%.2	Ri-1 1%.3	Ri-1 1%.4	Ri-1 21%.1	Ri-1 21%.2	Ri-1 21%.3	Ri-1 21%.4	x>=1.5	x<=0.66	Student's T-test Significant 1%_21%	Student's T-test significant	Student's T-test Significant 1%_21%_x>=1.5	Student's T-test Significant 1%_21%_x<=0.66	Peptides	Razor + unique peptides	Unique peptides	Mol. weight [kDa]	Q-value	Score	1%	21%	1%_x/y_21%	fold change	-Log Student's T-test p-value 1%_21%	Student's T-test Difference 1%_21%	Student's T-test Test statistic 1%_21%	Protein IDs	Majority protein IDs	Protein names	Gene names
-1.74275350570679	-0.0497386120259762	0.394457370042801	-1.369096159935	0.640248656272888	0.731144487857819	0.774623692035675	0.621114134788513	Discard	Keep	+	1%_21%	+_Discard	+_Keep	1	1	1	11602	7105	1708	762423902	2645049792	0,288245558738708	-3.46926	1,44380124071444	-1,38356546964496	-2,69127734850343	H3BNI4	H3BNI4		ATP6V0C
-1.0142138004303	-1.67759943008423	-0.033883698284626	-0.175735801458359	1.52503323554993	0.181877329945564	0.759667754173279	0.434854328632355	Discard	Keep	+	1%_21%	+_Discard	+_Keep	4	1	1	84984	27056	23648	256158408	603371080	0,424545377492905	-2.35546	1,62422907880689	-1,45071634463966	-3,00819060385247	H0YLF3	H0YLF3		B2M
-0.0510025136172771	-1.35705041885376	-1.67189204692841	0.0251258108764887	0.741171956062317	0.648204624652863	0.790271580219269	0.875170946121216	Discard	Keep	+	1%_21%	+_Discard	+_Keep	8	1	1	24344	1	-2	64372049,5	268069280	0,240132138133049	-4.16437	1,87247902396941	-1,52740956889465	-3,46331498893496	C9JFN4	C9JFN4		BZW1
-1.10550713539124	0.598606109619141	-1.23149025440216	-1.25939571857452	0.538313031196594	0.886729538440704	0.83135062456131	0.741393804550171	Discard	Keep	+	1%_21%	+_Discard	+_Keep	4	1	1	14313	68671	17413	288429264	525345368	0,549027860164642	-1.8214	1,77386919529445	-1,49889349937439	-3,27956104276002	F5H875	F5H875		CHMP1A
-0.172501027584076	-0.355001002550125	-2.17650699615479	-0.0685360506176949	0.768859922885895	0.827332854270935	0.847801506519318	0.328550696372986	Discard	Keep	+	1%_21%	+_Discard	+_Keep	8	1	1	30031	0	97385	143725203	295992532	0,485570341348648	-2.05943	1,45054159161114	-1,38627251423895	-2,70294068555765	R9R4D9;C9JTB0	R9R4D9		IKZF1
-0.770878612995148	-0.730740129947662	-0.389796137809753	-1.39175009727478	-0.0133225815370679	1.0425671339035	0.847986102104187	1.40593433380127	Discard	Keep	+	1%_21%	+_Discard	+_Keep	2	1	1	13488	0	19176	188254064	430094584	0,437703847885132	-2.28465	2,37804762099141	-1,64158249157481	-4,48109971983108	V9GYI1;A0A087WT39;X6RKG5	V9GYI1;A0A087WT39;X6RKG5		LIME1
-0.542024791240692	0.413644671440125	-1.27641236782074	-1.59047067165375	0.593177199363708	0.584905922412872	0.783617794513702	1.03356230258942	Discard	Keep	+	1%_21%	+_Discard	+_Keep	1	1	1	58681	1	-2	755146640	1257367392	0,600577533245087	-1.66506	1,76969218025689	-1,49763159453869	-3,27186780657208	F8VP02	F8VP02		NUBPL
-0.889030992984772	-0.562491655349731	-0.942672789096832	-0.760413527488708	1.3897043466568	1.11104357242584	-0.396568983793259	1.05043005943298	Discard	Keep	+	1%_21%	+_Discard	+_Keep	6	1	1	13519	0	4283	1082833008	2276207712	0,475718051195145	-2.10209	2,06778633487968	-1,5773044899106	-3,84040649213071	H7BZJ3	H7BZJ3		PDIA3
-0.541745126247406	-0.920373737812042	-1.13561594486237	-0.0891748443245888	0.739304661750793	1.23727524280548	-0.70127809047699	1.41160774230957	Discard	Keep	+	1%_21%	+_Discard	+_Keep	1	1	1	16359	27093	23813	1590578656	3386396000	0,469696611166	-2.12903	1,34844500482005	-1,34345480240881	-2,52753557099948	E5RJV1	E5RJV1		PPP2R2A
-0.31695282459259	-0.553299009799957	-0.371414005756378	-1.92120945453644	0.477971822023392	0.72622275352478	0.766813933849335	1.19186687469482	Discard	Keep	+	1%_21%	+_Discard	+_Keep	11	1	1	19526	7151	34606	218843280	895140656	0,244479209184647	-4.09033	2,08550208130531	-1,58143766969442	-3,87554734864335	X6RAL5;H7BZW6;U3KPY7	X6RAL5;H7BZW6		SAP18
-0.223943889141083	-0.430517107248306	-0.807428538799286	-1.60732817649841	-0.0885999351739883	0.876001715660095	0.866601347923279	1.41521465778351	Discard	Keep	+	1%_21%	+_Discard	+_Keep	5	2	0	30216	1	-2	55183349	114265368	0,482940286397934	-2.07065	1,89874447795225	-1,53460887447	-3,51297630369145	H7C561	H7C561		SF1
-0.749698221683502	-0.276704251766205	-1.33465373516083	-1.15263772010803	0.643919944763184	0.75329577922821	0.936408519744873	1.1800696849823	Discard	Keep	+	1%_21%	+_Discard	+_Keep	5	1	1	27785	1	-2	79709354	167100356	0,477014869451523	-2.09637	3,26771583850552	-1,75684696435928	-6,69233651364685	H7C085	H7C085		TMEM214
-1.1460268497467	-0.556885957717896	-0.309202551841736	-1.04904401302338	0.939739644527435	-0.149044781923294	1.72581315040588	0.54465126991272	Discard	Keep	+	1%_21%	+_Discard	+_Keep	6	1	1	53305	19321	27227	6111315,25	9657904,75	0,632778525352478	-1.58033	1,88397228846694	-1,53057966381311	-3,48500755740828	A0A075B7G3	A0A075B7G3		ZNF595
-1.51485323905945	-0.342409998178482	0.572670161724091	-1.50440633296967	0.771415591239929	0.630727767944336	0.838688254356384	0.548167884349823	Discard	Keep	+	1%_21%	+_Discard	+_Keep	5	3	0	25914	0	48851	119906376,5	535589760	0,223877280950546	-4.46673	1,47128052155681	-1,39449972659349	-2,73890599517149	A0A0G2JJV3	A0A0G2JJV3
-0.674394905567169	-0.959200382232666	-1.52523672580719	-0.348962187767029	0.675081312656403	0.791069269180298	0.945572555065155	1.09607100486755	Discard	Keep	+	1%_21%	+_Discard	+_Keep	6	2	2	44095	29869	45782	62035965	111228708	0,557733416557312	-1.79297	3,2349503734165	-1,75389708578587	-6,59897054796165	M0R3H8;Q01892-3;Q01892	M0R3H8
-0.823696076869965	-1.03240418434143	-1.1841744184494	-0.625976860523224	0.70434832572937	1.03989803791046	0.824980616569519	1.09702444076538	Discard	Keep	+	1%_21%	+_Discard	+_Keep	28	28	28	18179	0	32331	81442668	229817856	0,354379206895828	-2.82184	4,69562418220269	-1,83312574028969	-12,015656382144	Q9C0C2;Q9C0C2-2;E9PKK0;E9PKE7	Q9C0C2	182 kDa tankyrase-1-binding protein	TNKS1BP1
-1.11124336719513	-1.42259907722473	-0.542851030826569	-0.41215506196022	1.02755725383759	1.12082576751709	0.488239794969559	0.852225661277771	Discard	Keep	+	1%_21%	+_Discard	+_Keep	12	12	12	67351	0	72547	255709332	402519504	0,635271906852722	-1.57413	3,1351468040883	-1,74442425370216	-6,32087552823052	Q6L8Q7;F6T1Q0;Q6L8Q7-2	Q6L8Q7;F6T1Q0;Q6L8Q7-2	2,5-phosphodiesterase 12	PDE12
-1.09909737110138	-0.911720216274261	-0.757104635238647	-0.886161625385284	0.500228703022003	1.20612490177155	0.989175915718079	0.958554327487946	Discard	Keep	+	1%_21%	+_Discard	+_Keep	14	14	14	20683	0	16699	3225981504	4899046144	0,658491730690002	-1.51862	4,50178798271252	-1,82704192399979	-11,1218436995368	Q9Y3B7;Q9Y3B7-2;Q9Y3B7-3;E9PQB6;H0YCD5	Q9Y3B7;Q9Y3B7-2;Q9Y3B7-3	39S ribosomal protein L11, mitochondrial	MRPL11
-1.08402049541473	-0.510652601718903	-0.957561790943146	-0.816296100616455	-0.0746821239590645	1.2213180065155	1.02358245849609	1.19831264019012	Discard	Keep	+	1%_21%	+_Discard	+_Keep	5	5	5	15947	0	62151	1893308800	3156900928	0,599736511707306	-1.6674	2,63874514631516	-1,68426549248397	-5,06579568440859	Q6P1L8	Q6P1L8	39S ribosomal protein L14, mitochondrial	MRPL14
-1.14033317565918	-1.08989977836609	-0.747752845287323	-0.521353900432587	0.321706742048264	1.26465427875519	0.684252798557281	1.22872579097748	Discard	Keep	+	1%_21%	+_Discard	+_Keep	6	6	6	22814	0	40181	1063673280	1989886016	0,534539818763733	-1.87077	3,18943311512313	-1,74966982752085	-6,47097782023399	Q7Z2W9;F5H7V8;Q7Z2W9-2;H3BUY0	Q7Z2W9;F5H7V8;Q7Z2W9-2	39S ribosomal protein L21, mitochondrial	MRPL21
-1.38467180728912	-0.192643389105797	0.341260641813278	-1.65756928920746	0.835075557231903	0.902396500110626	0.550115346908569	0.606036484241486	Discard	Keep	+	1%_21%	+_Discard	+_Keep	9	9	9	30156	0	3734	739080224	1150950752	0,642147541046143	-1.55727	1,61291388812734	-1,44681193307042	-2,98800640859711	Q13084;A2IDC6;Q4TT37;A2IDC7	Q13084;A2IDC6;Q4TT37;A2IDC7	39S ribosomal protein L28, mitochondrial	MRPL28
-0.557678639888763	-1.53847062587738	-0.720162868499756	-0.584507524967194	0.834607660770416	1.06946742534637	0.247689694166183	1.24905502796173	Discard	Keep	+	1%_21%	+_Discard	+_Keep	18	18	18	48117	0	82453	983502112	1551990880	0,633703529834747	-1.57802	2,75376244642195	-1,70040986686945	-5,33901334649938	Q9BZE1;S4R369;A6NHR2;H0Y4J2	Q9BZE1;S4R369;A6NHR2	39S ribosomal protein L37, mitochondrial	MRPL37
-1.94235873222351	-0.442778050899506	-0.746517777442932	0.0157149396836758	0.931994915008545	0.643981218338013	0.817860126495361	0.722103238105774	Discard	Keep	+	1%_21%	+_Discard	+_Keep	2	2	2	16661	0	37012	178897946	578131664	0,309441536664963	-3.23163	1,98824001345481	-1,55796977970749	-3,68459185178078	Q9Y6G3;S4R360;J3KPP0;S4R2Z7	Q9Y6G3;S4R360;J3KPP0;S4R2Z7	39S ribosomal protein L42, mitochondrial	MRPL42
-1.24970209598541	-0.448561906814575	-1.65696954727173	0.601296305656433	1.0770171880722	0.49801966547966	0.70572292804718	0.473177522420883	Discard	Keep	+	1%_21%	+_Discard	+_Keep	2	2	2	12107	0	58085	272096956	446561960	0,609315156936646	-1.64119	1,42754396909399	-1,3769686371088	-2,66319686849099	Q96EL3;B9A051	Q96EL3;B9A051	39S ribosomal protein L53, mitochondrial	MRPL53
-0.550046384334564	-1.06831073760986	-0.847700655460358	-1.17528963088989	1.16223251819611	0.931154787540436	0.915992915630341	0.631967127323151	Discard	Keep	+	1%_21%	+_Discard	+_Keep	13	13	13	63151	0	40313	114815702	240793560	0,476822137832642	-2.09722	4,32599232153751	-1,82067368924618	-10,3645145248635	O15530;E9PER6;O15530-3;O15530-4;O15530-2;Q6A1A2;O15530-5;H3BQ10;H3BPW1	O15530;E9PER6;O15530-3;O15530-4;O15530-2;Q6A1A2;O15530-5	3-phosphoinositide-dependent protein kinase 1;Putative 3-phosphoinositide-dependent protein kinase 2	PDPK1;PDPK2P
-0.604439198970795	-0.851945340633392	0.22437696158886	-1.47516942024231	1.00935435295105	0.163084506988525	1.62155556678772	-0.0868174955248833	Discard	Keep	+	1%_21%	+_Discard	+_Keep	2	2	2	66767	0	52433	2600863872	5595190592	0,464839160442352	-2.15128	1,37177057818103	-1,35358848236501	-2,56738219994657	P62273;P62273-2	P62273;P62273-2	40S ribosomal protein S29	RPS29
-1.32924485206604	-0.974356889724731	-0.674342930316925	-0.674988329410553	0.816558241844177	0.961034953594208	0.826800942420959	1.04853880405426	Discard	Keep	+	1%_21%	+_Discard	+_Keep	17	17	17	22876	0	32331	1707367008	2781074944	0,61392343044281	-1.62887	4,48487918247613	-1,82646648585796	-11,0468590417395	P46782;M0R0R2;M0R0F0;M0QZN2	P46782;M0R0R2;M0R0F0;M0QZN2	40S ribosomal protein S5;40S ribosomal protein S5, N-terminally processed	RPS5
-1.5276757478714	-0.810368597507477	-0.866523623466492	-0.182302325963974	0.328910797834396	1.0168251991272	1.01103568077087	1.03009867668152	Discard	Keep	+	1%_21%	+_Discard	+_Keep	21	21	21	32728	0	12754	4291370560	9219616512	0,46546083688736	-2.14841	2,70275695884724	-1,69343516230583	-5,21663419254299	Q02878;F8VZ45;U3KQR5;F8VR69;F8VZA3;F8VWR1;F8VU16	Q02878	60S ribosomal protein L6	RPL6
-0.840714454650879	-0.831862449645996	-1.03640246391296	-1.02226662635803	0.914752125740051	0.956746101379395	0.912851989269257	0.946895778179169	Discard	Keep	+	1%_21%	+_Discard	+_Keep	11	11	11	18867	0	11235	16186198,75	3181530432	0,00508755119517446	-196.558	7,26963323503441	-1,86562299728394	-32,7665381376083	Q9Y4K1;Q9Y4K1-2	Q9Y4K1	Absent in melanoma 1 protein	AIM1
0.252569496631622	-0.289402633905411	-2.19216060638428	-0.441992193460464	0.61302649974823	0.522859752178192	0.877277195453644	0.657822489738464	Discard	Keep	+	1%_21%	+_Discard	+_Keep	7	7	7	4581	0	33413	26731157,75	88406146	0,302367657423019	-3.30723	1,33045988271599	-1,33549296855927	-2,49689669719219	Q9GZN1;F8W057;F8VRL1;G3V1Y1;F8VP72;F8W043;F8W0Q1;F8VSD1;Q9GZN1-2	Q9GZN1;F8W057;F8VRL1;G3V1Y1	Actin-related protein 6	ACTR6
-0.0859428346157074	-0.142440661787987	-0.197158932685852	-2.26065063476563	0.614766240119934	0.616717338562012	0.784558475017548	0.670150876045227	Discard	Keep	+	1%_21%	+_Discard	+_Keep	5	5	5	20061	0	20504	1630143836	5311874304	0,3068867623806	-3.25853	1,34762918195857	-1,34309649839997	-2,52614419138018	Q9Y3D8;A0A087WVD7;Q9Y3D8-2;D6RDH4;A0A087WY94	Q9Y3D8;A0A087WVD7;Q9Y3D8-2;D6RDH4	Adenylate kinase isoenzyme 6	AK6;TAF9
-0.452820599079132	-2.15608739852905	0.151281490921974	-0.253311842679977	0.428984016180038	0.597895801067352	0.618808805942535	1.06524968147278	Discard	Keep	+	1%_21%	+_Discard	+_Keep	8	8	8	49669	0	87482	32303483,75	134343594	0,240454211831093	-4.1588	1,37615431659403	-1,35546916350722	-2,57488516983698	O95396	O95396	Adenylyltransferase and sulfurtransferase MOCS3;Molybdopterin-synthase adenylyltransferase;Molybdopterin-synthase sulfurtransferase	MOCS3
-0.410343945026398	-1.34189283847809	-1.47125577926636	0.11840158700943	0.247237607836723	1.07831168174744	0.739667356014252	1.03987431526184	Discard	Keep	+	1%_21%	+_Discard	+_Keep	12	12	3	5672	0	12864	328544040	509033728	0,645426869392395	-1.54936	1,96684786299542	-1,55254548415542	-3,6432243228765	Q8N6H7;G5E9L0;E9PQP3;A0A0D9SF70;Q8N6H7-2;E9PMU9;Q8N6H7-3;H0YDN9	Q8N6H7;G5E9L0;E9PQP3;A0A0D9SF70;Q8N6H7-2	ADP-ribosylation factor GTPase-activating protein 2	ARFGAP2
0.169618278741837	-1.2230806350708	-1.74740529060364	-0.0256570223718882	0.367458134889603	1.09428083896637	0.401836574077606	0.962949156761169	Discard	Keep	+	1%_21%	+_Discard	+_Keep	5	5	5	44915	0	72761	134528044	421508944	0,319158226251602	-3.13324	1,52006265873489	-1,41326234349981	-2,82399412143282	Q66PJ3;Q66PJ3-2;Q66PJ3-3;F5GYV5;H7BZV4;A0A0C4DG62;F8WCT1;Q66PJ3-7;Q66PJ3-4;F5H7X4;F8WEP2;A0A0C4DH18;Q66PJ3-5	Q66PJ3;Q66PJ3-2;Q66PJ3-3;F5GYV5;H7BZV4;A0A0C4DG62;F8WCT1;Q66PJ3-7;Q66PJ3-4;F5H7X4	ADP-ribosylation factor-like protein 6-interacting protein 4	ARL6IP4
-0.877787232398987	-1.18114364147186	-0.551739513874054	-0.898489832878113	0.343117594718933	1.04700171947479	1.42254889011383	0.69649213552475	Discard	Keep	+	1%_21%	+_Discard	+_Keep	7	7	7	13142	0	14494	51539369	99331776	0,518860816955566	-1.9273	3,24246174239855	-1,75458014011383	-6,62028262774279	P51825;P51825-2;P51825-3;F5GXF9	P51825;P51825-2;P51825-3;F5GXF9	AF4/FMR2 family member 1	AFF1
-1.579141497612	-0.687532246112823	-1.01209211349487	-0.14230951666832	0.970842063426971	0.990385055541992	0.724745273590088	0.735103011131287	Discard	Keep	+	1%_21%	+_Discard	+_Keep	13	13	11	57903	0	23911	176044638	472722088	0,372406214475632	-2.68524	2,83176847640706	-1,71053769439459	-5,53005364650415	Q8TD30;Q8TD30-2;H3BU54	Q8TD30;Q8TD30-2	Alanine aminotransferase 2	GPT2
-0.430863618850708	-0.0957489982247353	-0.105670340359211	-2.15683269500732	0.634781956672668	0.379261016845703	0.987202882766724	0.7878697514534	Discard	Keep	+	1%_21%	+_Discard	+_Keep	12	12	12	41465	0	24626	109124390,75	420969304	0,259221732616425	-3.8577	1,4714282908438	-1,39455781504512	-2,73916269087711	P30533;D6REW6	P30533	Alpha-2-macroglobulin receptor-associated protein	LRPAP1
-1.44207346439362	-1.39645528793335	0.0252927280962467	-0.457428276538849	0.702503263950348	0.759485125541687	1.06937384605408	0.739302098751068	Discard	Keep	+	1%_21%	+_Discard	+_Keep	8	1	1	10324	1	-2	129215304	209954408	0,615444600582123	-1.62484	2,34413781331782	-1,63533215876669	-4,40832301988517	Q08043;A0A087WSZ2	Q08043;A0A087WSZ2	Alpha-actinin-3	ACTN3
-1.88825070858002	-0.382025569677353	-0.527502179145813	0.12877468764782	-0.0292052775621414	0.846462905406952	0.395830869674683	1.45591533184052	Discard	Keep	+	1%_21%	+_Discard	+_Keep	3	3	3	57868	43732	39154	7213723,25	34830804,75	0,207107558846474	-4.82841	1,32824172177127	-1,33450189977884	-2,4931228606526	D6REB5;P35475;P35475-2;D6RBD5;D6R9D5;H0Y9B3	D6REB5;P35475;P35475-2	Alpha-L-iduronidase	IDUA
-0.377320975065231	-0.373494237661362	-1.29711484909058	-1.40469229221344	0.792953014373779	0.691984057426453	0.886491537094116	1.08119380474091	Discard	Keep	+	1%_21%	+_Discard	+_Keep	3	3	3	342	0	13151	40387859,5	172493520	0,234141319990158	-4.27092	2,96390767394964	-1,72631119191647	-5,86483497715815	Q9H4F1;A6NJX0	Q9H4F1;A6NJX0	Alpha-N-acetyl-neuraminyl-2,3-beta-galactosyl-1,3-N-acetyl-galactosaminide alpha-2,6-sialyltransferase	ST6GALNAC4
0.138991564512253	-1.47704875469208	0.0254114288836718	-1.5911740064621	0.402474343776703	0.741088330745697	0.935255527496338	0.825001537799835	Discard	Keep	+	1%_21%	+_Discard	+_Keep	24	24	24	6189	0	28492	433038430	1688274720	0,256497621536255	-3.89867	1,62771035884042	-1,45190987689421	-3,01440955375671	P40222	P40222	Alpha-taxilin	TXLNA
-0.210924133658409	-1.26486611366272	-1.25375211238861	-0.475397974252701	0.211665138602257	0.979210257530212	1.51979148387909	0.494273513555527	Discard	Keep	+	1%_21%	+_Discard	+_Keep	5	5	5	49298	0	17327	134258634	224820096	0,59718257188797	-1.67453	2,17994846449712	-1,60247018188238	-4,06571371962897	Q8IV38;G3V0G5;F8WB95	Q8IV38;G3V0G5	Ankyrin repeat and MYND domain-containing protein 2	ANKMY2
-1.17107665538788	-1.30276930332184	-0.800469934940338	0.0506766326725483	0.197275832295418	0.880632042884827	0.780000865459442	1.36573040485382	Discard	Keep	+	1%_21%	+_Discard	+_Keep	16	16	16	52739	0	2118	2080792960	3394677952	0,612957358360291	-1.63143	2,22443775485697	-1,61181960161775	-4,1569972443253	P20073;P20073-2	P20073;P20073-2	Annexin A7	ANXA7
-0.983820676803589	-0.515231132507324	-0.124156773090363	-1.29837489128113	-0.127738177776337	0.773140370845795	1.79416906833649	0.482012182474136	Discard	Keep	+	1%_21%	+_Discard	+_Keep	3	3	3	17242	18018	2808	19648197,5	30936535	0,635113060474396	-1.57452	1,65395558286518	-1,46079172939062	-3,06143234502043	Q9P2R6;B1AKN3;Q9P2R6-2;H7BYW9	Q9P2R6;B1AKN3;Q9P2R6-2	Arginine-glutamic acid dipeptide repeats protein	RERE
-0.864100992679596	-1.31368637084961	-0.907996296882629	-0.565367758274078	0.817054510116577	0.798960030078888	1.07524645328522	0.959890425205231	Discard	Keep	+	1%_21%	+_Discard	+_Keep	3	3	2	29267	15401	55333	192226184	346498264	0,554768085479736	-1.80256	4,45913213340939	-1,82557570934296	-10,9335709098019	Q9NW81;Q9NW81-4;Q9NW81-5;K7ESN5;M0QZP7;M0QZC4;K7EIV4;B4DFT4	Q9NW81;Q9NW81-4;Q9NW81-5	ATP synthase subunit s-like protein	ATP5SL
-0.824958980083466	-0.779141008853912	0.587260365486145	-1.64137399196625	-0.126105293631554	0.922504901885986	1.12235546112061	0.739458501338959	Discard	Keep	+	1%_21%	+_Discard	+_Keep	12	12	12	13308	0	51122	58161108	94033138	0,618517160415649	-1.61677	1,31624456720285	-1,32910679653287	-2,47273005174541	O94761;A0A087WZ30;A0A087X072;V9GYB6;V9GZ64;A0A087WTJ0;V9GYA3	O94761;A0A087WZ30	ATP-dependent DNA helicase Q4	RECQL4
-1.36594426631927	-0.993367075920105	-0.526738703250885	-0.736582934856415	0.745089590549469	1.01193571090698	0.869591474533081	0.996016204357147	Discard	Keep	+	1%_21%	+_Discard	+_Keep	18	18	18	72456	0	25133	366410048	1003849696	0,365004867315292	-2.73969	4,10476353847863	-1,81131649017334	-9,47799591530577	Q8N8A6	Q8N8A6	ATP-dependent RNA helicase DDX51	DDX51
-0.598119139671326	-0.966300249099731	-1.38514971733093	-0.630978107452393	0.546378910541534	1.09031617641449	1.05894470214844	0.884907364845276	Discard	Keep	+	1%_21%	+_Discard	+_Keep	19	19	19	86454	0	26147	360058784	862554656	0,417433023452759	-2.39559	3,71401464626505	-1,79027359187603	-8,07500086075564	Q96TA2;Q96TA2-3;Q96TA2-2;Q96I63;R4GNA5;Q5T8D1;Q5T8D2	Q96TA2;Q96TA2-3;Q96TA2-2;Q96I63	ATP-dependent zinc metalloprotease YME1L1	YME1L1
-0.220906898379326	-0.824987351894379	-0.729570925235748	-1.31520509719849	-0.291449993848801	1.11856818199158	0.896631419658661	1.36692070960999	Discard	Keep	+	1%_21%	+_Discard	+_Keep	5	5	5	13898	0	28652	11528310,25	23130865,25	0,498395085334778	-2.00644	1,93899715583525	-1,54533514752984	-3,58969668402246	Q8WXX7;Q8WXX7-2;A0A087WVB5;Q75MD7;Q8WXX7-5;H7BZZ9;H7C090;Q8WXX7-3	Q8WXX7;Q8WXX7-2;A0A087WVB5;Q75MD7;Q8WXX7-5	Autism susceptibility gene 2 protein	AUTS2
-1.66370916366577	0.303124308586121	-0.24584387242794	-1.36395180225372	0.645803868770599	0.790899395942688	0.747911691665649	0.785765528678894	Discard	Keep	+	1%_21%	+_Discard	+_Keep	5	5	5	16389	0	14505	110046279,5	389004984	0,282891690731049	-3.53492	1,72929655340788	-1,48519025370479	-3,19782980378838	O15392;A0A0B4J1S3;H3BLT4;O15392-5;O15392-4;O15392-2;O15392-7;O15392-6;O15392-3;K7EMW2	O15392;A0A0B4J1S3;H3BLT4;O15392-5;O15392-4;O15392-2	Baculoviral IAP repeat-containing protein 5	BIRC5
-1.05897498130798	-0.477572679519653	-1.66896879673004	-0.12699082493782	0.682507038116455	0.865219533443451	1.03690838813782	0.747872412204742	Discard	Keep	+	1%_21%	+_Discard	+_Keep	18	17	10	48043	0	28375	4509499648	7808850304	0,577485680580139	-1.73164	2,52191965727656	-1,66625366359949	-4,79808391608516	Q7L1Q6;Q7L1Q6-4;Q7L1Q6-3;Q7L1Q6-2;C9IZ80;C9J188;C9JWF5;H0Y503;C9JV57	Q7L1Q6;Q7L1Q6-4;Q7L1Q6-3;Q7L1Q6-2;C9IZ80	Basic leucine zipper and W2 domain-containing protein 1	BZW1
-1.10030806064606	-1.37413907051086	-0.450005561113358	-0.610072910785675	1.26545774936676	0.786103308200836	0.802458703517914	0.680505812168121	Discard	Keep	+	1%_21%	+_Discard	+_Keep	7	7	7	4392	0	215	198704552	543512624	0,36559322476387	-2.73528	3,3907201105125	-1,7672627940774	-7,05231349058062	P15291;P15291-2;Q86XA6	P15291;P15291-2	Beta-1,4-galactosyltransferase 1;Lactose synthase A protein;N-acetyllactosamine synthase;Beta-N-acetylglucosaminylglycopeptide beta-1,4-galactosyltransferase;Beta-N-acetylglucosaminyl-glycolipid beta-1,4-galactosyltransferase;Processed beta-1,4-galactosyltransferase 1	B4GALT1
-1.20083117485046	-1.61635637283325	-0.17999991774559	-0.266379565000534	1.06660711765289	0.82460218667984	0.889570236206055	0.482787519693375	Discard	Keep	+	1%_21%	+_Discard	+_Keep	3	3	3	43927	27089	23793	46615153,5	129777146	0,359193861484528	-2.78401	2,32529795045551	-1,6317835226655	-4,36819638207411	O60512;O60512-2	O60512	Beta-1,4-galactosyltransferase 3;N-acetyllactosamine synthase;Beta-N-acetylglucosaminylglycopeptide beta-1,4-galactosyltransferase;Beta-N-acetylglucosaminyl-glycolipid beta-1,4-galactosyltransferase	B4GALT3
-1.85499203205109	-0.651496946811676	-0.274235397577286	-0.209102183580399	1.3702152967453	0.434518218040466	0.944049537181854	0.241043493151665	Discard	Keep	+	1%_21%	+_Discard	+_Keep	3	3	3	40041	43776	39301	44327299,5	83731999	0,5293949842453	-1.88895	1,76074533633776	-1,49491327628493	-3,25541338093051	O60513;C9J3R8;E7ETS9;C9J4S5	O60513;C9J3R8;E7ETS9	Beta-1,4-galactosyltransferase 4;N-acetyllactosamine synthase;Lactotriaosylceramide beta-1,4-galactosyltransferase	B4GALT4
-0.325775295495987	-0.63136887550354	-0.0158222932368517	-1.8886216878891	0.00296470196917653	0.922774136066437	0.649471998214722	1.28637731075287	Discard	Keep	+	1%_21%	+_Discard	+_Keep	2	2	2	14289	16647	84482	663099936	1196255424	0,554312944412231	-1.80404	1,56763455857499	-1,43079407478217	-2,90767342090661	Q9Y3E2	Q9Y3E2	BolA-like protein 1	BOLA1
-0.242174983024597	-1.21429264545441	0.279138714075089	-1.60675466060638	-0.0693473890423775	1.09630155563354	0.710000157356262	1.04712915420532	Discard	Keep	+	1%_21%	+_Discard	+_Keep	4	4	4	19769	0	99435	201103707	1124686768	0,178808644413948	-5.59257	1,46504415956747	-1,39204176329076	-2,7280782287384	Q10589;Q10589-2	Q10589;Q10589-2	Bone marrow stromal antigen 2	BST2
-1.00854432582855	0.287510603666306	-0.994989037513733	-1.51063644886017	0.915137588977814	0.796159625053406	0.823416352272034	0.691945612430573	Discard	Keep	+	1%_21%	+_Discard	+_Keep	8	8	8	53918	0	19079	83633707	171658932	0,4872085750103	-2.05251	2,23177959087089	-1,61332959681749	-4,17216957315869	Q9NWK9;Q9NWK9-2	Q9NWK9;Q9NWK9-2	Box C/D snoRNA protein 1	ZNHIT6
-1.39700078964233	-0.483795374631882	-0.201341271400452	-1.2861088514328	0.412357598543167	1.13324248790741	0.864313840866089	0.958332300186157	Discard	Keep	+	1%_21%	+_Discard	+_Keep	12	12	12	42966	0	79305	2374955808	3647886912	0,651049733161926	-1.53598	2,63777679058231	-1,68412312865257	-5,06353685648524	P54687;P54687-5;P54687-4;P54687-3;P54687-2;A0A087WYF2;F5H2F2	P54687;P54687-5;P54687-4;P54687-3;P54687-2	Branched-chain-amino-acid aminotransferase, cytosolic	BCAT1
-0.74402117729187	-1.33999991416931	0.388068497180939	-1.30766332149506	0.219070449471474	0.671355307102203	0.885194301605225	1.22799575328827	Discard	Keep	+	1%_21%	+_Discard	+_Keep	4	3	3	93371	0	10093	20932802	56438763	0,37089404463768	-2.69619	1,78357359566372	-1,50180793181062	-3,29746223797382	P56945;P56945-8;P56945-7;P56945-4;P56945-5;P56945-3;P56945-2;P56945-6	P56945;P56945-8;P56945-7;P56945-4;P56945-5;P56945-3;P56945-2;P56945-6	Breast cancer anti-estrogen resistance protein 1	BCAR1
-0.910679519176483	-0.751007437705994	-1.43774020671844	-0.404140681028366	0.44246718287468	0.846357047557831	1.18347024917603	1.03127336502075	Discard	Keep	+	1%_21%	+_Discard	+_Keep	35	35	35	1787	0	32331	312399244	697821504	0,447677850723267	-2.23375	3,21199138819193	-1,75178392231464	-6,53416433862697	Q9NRL2;Q9NRL2-2;A0A087WWN7;H0YJP5	Q9NRL2;Q9NRL2-2	Bromodomain adjacent to zinc finger domain protein 1A	BAZ1A
0.125117599964142	0.0450336523354053	-2.06312203407288	-0.819972693920135	0.291334331035614	0.804640173912048	0.891773283481598	0.725195705890656	Discard	Keep	+	1%_21%	+_Discard	+_Keep	11	11	1	5075	0	12028	1285582160	2217815136	0,57966160774231	-1.72514	1,37849846683165	-1,35647174250335	-2,57889918767262	O43670;J3QRS9;X6R4W8;O43670-4;O43670-3;J3KS31;J3QS27;J3KTL1;J3KRB6;J3KRW6;H0Y3M2	O43670;J3QRS9;X6R4W8;O43670-4;O43670-3	BUB3-interacting and GLEBS motif-containing protein ZNF207	ZNF207
-1.00125420093536	-0.839075028896332	-0.656495809555054	-1.16843581199646	0.649349331855774	1.08819842338562	0.834735035896301	1.09297811985016	Discard	Keep	+	1%_21%	+_Discard	+_Keep	14	14	14	49601	0	13324	864910256	2111330336	0,409651815891266	-2.4411	4,678705995505	-1,83263044059277	-11,9350708919315	Q13895;H7BY94;F8WBL2	Q13895	Bystin	BYSL
-1.12943363189697	-1.39143967628479	-0.655138432979584	-0.160437703132629	0.928820312023163	0.21645088493824	1.20315062999725	0.98802775144577	Discard	Keep	+	1%_21%	+_Discard	+_Keep	8	8	8	88701	0	11015	36848109,5	76192618	0,483617842197418	-2.06775	2,53417736900707	-1,6682247556746	-4,82572669125702	Q8WUQ7;Q8WUQ7-2;K7ENY9;K7EIU6;K7EMQ0	Q8WUQ7;Q8WUQ7-2;K7ENY9;K7EIU6	Cactin	CACTIN
-0.740816414356232	-1.13657796382904	-0.705856084823608	-1.06704044342041	0.597265958786011	0.861904978752136	0.989580392837524	1.20153951644897	Discard	Keep	+	1%_21%	+_Discard	+_Keep	11	11	11	24635	0	22941	532308624	859544608	0,619291424751282	-1.61475	4,4468790510381	-1,82514543831348	-10,8800318284003	Q9Y6J0;A0A087WWW8;Q9Y6J0-2;A0A087WXL7;B5MEB3	Q9Y6J0;A0A087WWW8;Q9Y6J0-2;A0A087WXL7;B5MEB3	Calcineurin-binding protein cabin-1	CABIN1
-1.57135164737701	-0.986500322818756	-0.277255684137344	-0.529060840606689	0.522626757621765	1.31504034996033	0.634173631668091	0.892327725887299	Discard	Keep	+	1%_21%	+_Discard	+_Keep	15	15	15	15293	0	17495	73632967	179901520	0,409295976161957	-2.44322	2,62399401125672	-1,68208424001932	-5,03145994524123	O75976;O75976-2;J3QQJ4;J3QRJ9	O75976;O75976-2	Carboxypeptidase D	CPD
-0.740561485290527	-1.04751861095428	-1.03604757785797	-0.89138400554657	0.896241307258606	0.790008842945099	1.01429188251495	1.01496946811676	Discard	Keep	+	1%_21%	+_Discard	+_Keep	8	8	8	46561	0	64875	81298960	196730332	0,413250744342804	-2.41984	6,07132420815314	-1,85775579512119	-20,6113357364411	O75718;C9JP16	O75718;C9JP16	Cartilage-associated protein	CRTAP
-0.224775061011314	-2.0166220664978	-0.252651631832123	-0.362969368696213	0.0771543234586716	1.17995452880859	0.732756078243256	0.867153286933899	Discard	Keep	+	1%_21%	+_Discard	+_Keep	10	1	1	49064	1	-2	32554496,5	52782717	0,616764307022095	-1.62136	1,56131985065172	-1,42850908637047	-2,89652421741633	H7BYT1;P48730-2;H0Y645;J3QQI9;H0Y2N6;J3KRM8;B4DLF1	H7BYT1;P48730-2;H0Y645	Casein kinase I isoform delta	CSNK1D;CSNK1E
-1.55751013755798	-1.07811284065247	0.120852909982204	-0.711413085460663	0.345507353544235	0.901356995105743	0.97466516494751	1.00465357303619	Discard	Keep	+	1%_21%	+_Discard	+_Keep	21	21	21	13328	0	12109	253400680	399831144	0,63376921415329	-1.57786	2,23061925195001	-1,61309156008065	-4,16976960298778	Q9BXL7;H7BY05;E2QRC0	Q9BXL7	Caspase recruitment domain-containing protein 11	CARD11
0.349459379911423	-1.6310807466507	-1.5489627122879	0.17819456756115	0.585110723972321	0.701515018939972	0.584693491458893	0.781070232391357	Discard	Keep	+	1%_21%	+_Discard	+_Keep	6	6	6	30037	0	21425	508391990	1542571712	0,329574286937714	-3.03422	1,30982330912018	-1,32619474455714	-2,4618277114081	P21964;P21964-2;E7EMS6;E7EUU8;H7BZ45;F8WBW9	P21964;P21964-2;E7EMS6;E7EUU8;H7BZ45;F8WBW9	Catechol O-methyltransferase	COMT
-1.16905605792999	-1.03224158287048	-0.705894827842712	-0.669877886772156	1.41874396800995	0.712861478328705	0.888670802116394	0.556793987751007	Discard	Keep	+	1%_21%	+_Discard	+_Keep	11	11	11	44552	0	86157	413961536	1067685680	0,38771852850914	-2.57919	3,68650397416821	-1,78853514790535	-7,98339194502794	P07339;F8WD96;C9JH19;F8W787;H7C469;H7C1V0	P07339;F8WD96;C9JH19	Cathepsin D;Cathepsin D light chain;Cathepsin D heavy chain	CTSD
-0.880970180034637	-0.566750168800354	-0.445559561252594	-1.58431875705719	0.57485556602478	1.00313460826874	0.786858916282654	1.1127495765686	Discard	Keep	+	1%_21%	+_Discard	+_Keep	4	4	4	33868	0	14321	873562224	2101096320	0,415764957666397	-2.40521	3,0794257501159	-1,73879933357239	-6,16962271984478	Q9UBR2	Q9UBR2	Cathepsin Z	CTSZ
-1.59627723693848	-0.590383589267731	-0.173652932047844	-0.700861394405365	1.01038408279419	1.10945200920105	-0.195350304245949	1.13668930530548	Discard	Keep	+	1%_21%	+_Discard	+_Keep	6	6	6	3354	0	25341	33243658,25	176924364	0,187897562980652	-5.32205	1,8840011197357	-1,53058756142855	-3,4850620485984	Q9UFF9;E5RIL2;Q9UFF9-3;E5RHL9;A0A0E3D6L6;E5RJC5;E5RHP3;B7Z9U0;E5RGE4;Q9UFF9-2;E5RFJ4	Q9UFF9;E5RIL2;Q9UFF9-3;E5RHL9;A0A0E3D6L6;E5RJC5;E5RHP3;B7Z9U0;E5RGE4;Q9UFF9-2	CCR4-NOT transcription complex subunit 8	CNOT8
-0.404795974493027	-2.01709699630737	-0.179381743073463	-0.233726263046265	1.39620935916901	0.416231364011765	0.378634184598923	0.643926203250885	Discard	Keep	+	1%_21%	+_Discard	+_Keep	4	4	4	23041	0	99504	150082827	337627064	0,444522500038147	-2.2496	1,53138075826127	-1,41750052198768	-2,84383810737595	Q01151;A0A087WX61	Q01151;A0A087WX61	CD83 antigen	CD83
-0.510197699069977	-1.68285357952118	-1.20806229114532	0.494975566864014	0.976443231105804	0.714357614517212	0.630211234092712	0.585125923156738	Discard	Keep	+	1%_21%	+_Discard	+_Keep	8	8	8	39134	0	23431	188290948	480141656	0,392157047986984	-2.55	1,63110160112618	-1,45306900143623	-3,02047175860123	O75794;X6RA30;X6RKY7;X6RF82;H7BZW7	O75794;X6RA30;X6RKY7;X6RF82	Cell division cycle protein 123 homolog	CDC123
-1.62186563014984	0.330069959163666	-1.56455361843109	0.194394141435623	0.646887719631195	0.67285168170929	0.709991335868835	0.632224380970001	Discard	Keep	+	1%_21%	+_Discard	+_Keep	6	6	6	153	7352	16912	27065093,75	79413768	0,340811103582382	-2.93418	1,32038970254724	-1,33097756654024	-2,47977248868356	Q8WUJ3;Q8WUJ3-2;H0YL56	Q8WUJ3;Q8WUJ3-2	Cell migration-inducing and hyaluronan-binding protein	CEMIP
-0.234965741634369	-0.797740817070007	-1.17330384254456	-1.19212317466736	0.214377701282501	0.822167813777924	1.17260277271271	1.1889853477478	Discard	Keep	+	1%_21%	+_Discard	+_Keep	4	4	2	23485	0	95853	380264360	590237336	0,644256711006165	-1.55218	2,7437763502718	-1,69906680285931	-5,31489782533583	Q96FZ7;I3L4A1;I3L3E4	Q96FZ7;I3L4A1;I3L3E4	Charged multivesicular body protein 6	CHMP6
-0.592433512210846	-0.699425041675568	-1.7607980966568	0.0416691415011883	0.184108629822731	0.515756785869598	0.946830093860626	1.3642920255661	Discard	Keep	+	1%_21%	+_Discard	+_Keep	27	23	20	33592	0	44577	27955011,25	55306690	0,505454480648041	-1.97842	1,79596365721851	-1,50549376104027	-3,32037409019193	Q9P2D1;Q9P2D1-3;Q9P2D1-4;Q9P2D1-2;H0YDC1	Q9P2D1	Chromodomain-helicase-DNA-binding protein 7	CHD7
-1.80483543872833	-1.03931784629822	-0.387923568487167	0.119182154536247	0.894864499568939	0.59434187412262	0.69894677400589	0.924741625785828	Discard	Keep	+	1%_21%	+_Discard	+_Keep	13	13	13	15109	0	36314	15689312,75	68890903	0,227741435170174	-4.39094	1,98219695824565	-1,55644736811519	-3,67288345224722	Q9HAW4;Q9HAW4-3;E7ESG2;Q9HAW4-2	Q9HAW4;Q9HAW4-3;E7ESG2;Q9HAW4-2	Claspin	CLSPN
-0.808209538459778	-1.08704006671906	-0.891780436038971	-0.93097859621048	0.760105788707733	1.03923499584198	0.910681188106537	1.00798666477203	Discard	Keep	+	1%_21%	+_Discard	+_Keep	19	19	19	76096	0	32331	1336001376	3471404544	0,384859025478363	-2.59835	6,20189158974012	-1,85900431871414	-21,6831694298449	O96005;O96005-4;O96005-3;K7EQQ1;K7EJ16;K7ERL5	O96005;O96005-4;O96005-3	Cleft lip and palate transmembrane protein 1	CLPTM1
-1.372971534729	-0.829220950603485	-0.879649817943573	-0.464493840932846	1.02434420585632	0.810580551624298	1.22109389305115	0.490317434072495	Discard	Keep	+	1%_21%	+_Discard	+_Keep	39	39	1	14667	0	32331	558433392	1134161792	0,492375433444977	-2.03097	3,46616385617088	-1,77316805720329	-7,28076116934205	O75153;Q9Y5I4;Q9Y5I4-2	O75153	Clustered mitochondria protein homolog	CLUH
-1.41774928569794	-0.889855980873108	-0.953667819499969	-0.214759439229965	0.495133966207504	1.14623856544495	0.933610260486603	0.901049733161926	Discard	Keep	+	1%_21%	+_Discard	+_Keep	4	4	4	1976	0	61987	253815336	621702288	0,408258646726608	-2.44943	3,07186107835956	-1,73801626265049	-6,14930475805578	Q96NT0;F8WCZ3;B8ZZ99;Q96NT0-2	Q96NT0;F8WCZ3;B8ZZ99	Coiled-coil domain-containing protein 115	CCDC115
-0.633896708488464	-1.04758393764496	-0.895937561988831	-1.00482797622681	0.357649594545364	1.25216615200043	0.832453668117523	1.13997673988342	Discard	Keep	+	1%_21%	+_Discard	+_Keep	6	6	6	44802	0	36462	56906245	124317430	0,457749515771866	-2.1846	3,72767718599234	-1,79112308472395	-8,12082854126578	P13994;K7ELI4;K7ES43;K7EJZ6	P13994;K7ELI4	Coiled-coil domain-containing protein 130	CCDC130
-0.200900226831436	-2.20884156227112	-0.398079544305801	0.090726874768734	0.491094440221786	0.695264995098114	0.859754085540771	0.67098081111908	Discard	Keep	+	1%_21%	+_Discard	+_Keep	18	18	18	40235	0	22734	1053640204	3379076544	0,311813056468964	-3.20705	1,38336692774802	-1,35854719765484	-2,58723997822726	Q9H6F5;H0YG79;Q9H6F5-2	Q9H6F5	Coiled-coil domain-containing protein 86	CCDC86
-0.905950546264648	-1.22660613059998	-0.448662966489792	-1.04874932765961	0.710921406745911	1.10676836967468	0.883844077587128	0.928435087203979	Discard	Keep	+	1%_21%	+_Discard	+_Keep	14	14	14	16481	0	3072	69075516	149860888	0,460930913686752	-2.16952	4,18700094780102	-1,81498447805643	-9,79924718487099	A6NC98;A6NC98-4;A6NC98-2;A6NC98-5;H7BY33;A6NC98-3;A6NC98-6	A6NC98;A6NC98-4;A6NC98-2	Coiled-coil domain-containing protein 88B	CCDC88B
-0.581568717956543	-1.04215371608734	-0.788672387599945	-1.17050778865814	1.30358827114105	0.739914298057556	1.04529881477356	0.494101047515869	Discard	Keep	+	1%_21%	+_Discard	+_Keep	7	6	6	37085	0	58673	59237512	162134608	0,365360081195831	-2.73703	3,73299413689305	-1,7914512604475	-8,13872295521698	Q9BW85;M0R2S3	Q9BW85;M0R2S3	Coiled-coil domain-containing protein 94	CCDC94
0.196592733263969	-1.59844815731049	-1.58404231071472	0.308930695056915	0.748901069164276	0.638582944869995	0.673571944236755	0.61591112613678	Discard	Keep	+	1%_21%	+_Discard	+_Keep	5	5	5	21764	0	97354	260366739	742688512	0,350573271512985	-2.85247	1,3371807465932	-1,33848353102803	-2,50833772381307	Q9H0A8;A0A0B4J287;H3BM91;H3BPG2;H3BQF2;Q9H0A8-3;Q9H0A8-2;H3BRX0	Q9H0A8;A0A0B4J287;H3BM91	COMM domain-containing protein 4	COMMD4
-1.89776909351349	-0.645677983760834	-0.544399440288544	-0.0292999781668186	0.861896932125092	1.10165047645569	0.400097280740738	0.753501832485199	Discard	Keep	+	1%_21%	+_Discard	+_Keep	24	24	24	13096	0	94946	241692308	370203384	0,652863562107086	-1.53171	1,99064421087188	-1,5585732543841	-3,6892549346561	Q86XI2;Q86XI2-2;H0Y6U5;F8WE06	Q86XI2;Q86XI2-2;H0Y6U5	Condensin-2 complex subunit G2	NCAPG2
-1.66523230075836	-0.171632528305054	-0.718294441699982	-0.398222267627716	-0.263897180557251	1.11363768577576	1.03551018238068	1.06813097000122	Discard	Keep	+	1%_21%	+_Discard	+_Keep	14	14	14	83207	0	2443	31748336,25	404632036	0,0784622430801392	-12.745	1,7024884001252	-1,47669079899788	-3,14904992047063	Q14746;Q14746-2;B7Z2Y2;V9GY21	Q14746;Q14746-2;B7Z2Y2	Conserved oligomeric Golgi complex subunit 2	COG2
-1.07907664775848	-1.43680918216705	0.266702860593796	-0.803288817405701	0.28264182806015	0.66907012462616	1.45077514648438	0.64998459815979	Discard	Keep	+	1%_21%	+_Discard	+_Keep	17	17	17	92742	0	25549	261515808	429195552	0,609316229820251	-1.64118	1,86825199675403	-1,52623587101698	-3,45535168878214	Q9UP83;Q9UP83-2;Q9UP83-3;U3KQU7	Q9UP83;Q9UP83-2;Q9UP83-3	Conserved oligomeric Golgi complex subunit 5	COG5
0.250478208065033	-0.0901894494891167	-1.44013106822968	-1.64114809036255	0.842598617076874	0.637454152107239	0.780928909778595	0.66000884771347	Discard	Keep	+	1%_21%	+_Discard	+_Keep	17	17	17	86343	0	38947	190378516	310856912	0,612431347370148	-1.63284	1,65306971603721	-1,46049523167312	-3,05984113513723	P83436	P83436	Conserved oligomeric Golgi complex subunit 7	COG7
-0.378793120384216	-1.1227707862854	-0.707731425762177	-1.01408457756042	-0.236070170998573	1.21238934993744	1.03299868106842	1.21406221389771	Discard	Keep	+	1%_21%	+_Discard	+_Keep	3	3	3	67299	0	14624	21727839,5	51527582	0,421673953533173	-2.3715	2,2238096225311	-1,6116899959743	-4,15570061016211	Q6UUV9;M0QX46;Q6UUV9-3;Q6UUV9-2;M0QXN6	Q6UUV9;M0QX46;Q6UUV9-3;Q6UUV9-2	CREB-regulated transcription coactivator 1	CRTC1
-0.696413159370422	-0.143128797411919	-0.643761873245239	-1.76844537258148	0.349375039339066	0.963597416877747	0.862890541553497	1.07588624954224	Discard	Keep	+	1%_21%	+_Discard	+_Keep	2	2	2	41955	98522	31039	12992924,75	75358137	0,172415688633919	-5.79994	2,29456134060252	-1,6258746124804	-4,30319450682534	P32302;P32302-2	P32302;P32302-2	C-X-C chemokine receptor type 5	CXCR5
-0.676541686058044	-1.02251887321472	-0.683940649032593	-0.555719971656799	1.96104717254639	0.422472357749939	0.798097550868988	-0.242895901203156	Discard	Keep	+	1%_21%	+_Discard	+_Keep	4	3	3	53056	89663	16004	11499800,5	26285685,75	0,437492847442627	-2.28575	1,67985792020663	-1,46936058998108	-3,10808543648303	O94921;O94921-3;O94921-2;E7EUK8;Q96Q40;Q96Q40-2;Q96Q40-4;Q96Q40-3;Q96Q40-5;C9IYJ9	O94921;O94921-3;O94921-2;E7EUK8;Q96Q40;Q96Q40-2;Q96Q40-4;Q96Q40-3;Q96Q40-5	Cyclin-dependent kinase 14;Cyclin-dependent kinase 15	CDK14;CDK15
-0.502252817153931	-1.3969703912735	-0.445282310247421	-0.531086504459381	-0.576757192611694	1.12823128700256	1.23123097419739	1.09288692474365	Discard	Keep	+	1%_21%	+_Discard	+_Keep	5	2	2	55715	32172	22489	8467364	1652968974,75	0,00512251863256097	-195.216	1,58720648874025	-1,43779600411654	-2,94231273788241	Q00536;Q00536-2;A0A087WZU2;Q00536-3;E5RGN0;H0YBX5;E5RJM2;H0YAZ9	Q00536;Q00536-2;A0A087WZU2;Q00536-3;E5RGN0	Cyclin-dependent kinase 16	CDK16
-1.45223081111908	-0.789096593856812	-0.580184459686279	-0.631523489952087	1.18819510936737	0.375837504863739	1.25730264186859	0.631700038909912	Discard	Keep	+	1%_21%	+_Discard	+_Keep	3	3	3	98602	0	17302	707273144	1595819296	0,443203806877136	-2.2563	2,96573361724982	-1,72651766240597	-5,86956284717266	P33552	P33552	Cyclin-dependent kinases regulatory subunit 2	CKS2
-1.08063554763794	-1.63613700866699	-0.416717261075974	-0.0574436895549297	0.382313996553421	1.29918432235718	0.704277157783508	0.805158078670502	Discard	Keep	+	1%_21%	+_Discard	+_Keep	1	1	1	59633	0	78852	46159414	73333691	0,629443526268005	-1.5887	2,14766722235653	-1,59546676557511	-4,00017156197964	Q9UK58;C9JPL0;Q9UK58-5;Q9UK58-4	Q9UK58;C9JPL0;Q9UK58-5;Q9UK58-4	Cyclin-L1	CCNL1
-1.39137959480286	-0.938868999481201	-0.418094098567963	-0.320276170969009	0.177320659160614	1.08861637115479	0.172009289264679	1.63067257404327	Discard	Keep	+	1%_21%	+_Discard	+_Keep	16	16	16	60586	0	12993	120340996	227949412	0,527928531169891	-1.8942	1,89764018802393	-1,5343094393611	-3,51088208316935	P35520;P35520-2;C9JMA6;H7C2H4;H7C1W6;H7C2W0	P35520;P35520-2	Cystathionine beta-synthase	CBS
-1.37590539455414	-0.557775676250458	-1.00050485134125	-0.405141681432724	0.497397601604462	1.49921905994415	0.329213619232178	1.0134973526001	Discard	Keep	+	1%_21%	+_Discard	+_Keep	10	10	6	46412	0	3019	59212718	145639930	0,406569242477417	-2.45961	2,5432041602669	-1,66966380923986	-4,84614909282121	Q15438;Q15438-2;Q15438-3;K7ENQ8;K7ERV8;K7EJN5;K7ENH6;K7EKA2	Q15438;Q15438-2;Q15438-3;K7ENQ8;K7ERV8	Cytohesin-1	CYTH1
-0.39330381155014	-1.22786736488342	-0.721617221832275	-0.956081807613373	-0.0204832535237074	0.78341668844223	1.07668209075928	1.4592547416687	Discard	Keep	+	1%_21%	+_Discard	+_Keep	8	8	8	56107	0	60246	359378520	597075048	0,601898372173309	-1.66141	2,4220318060474	-1,64943511830643	-4,57657676606522	Q2VPK5;H3BSW6;Q2VPK5-5;Q2VPK5-3;H3BNM3;H3BNU5	Q2VPK5;H3BSW6;Q2VPK5-5;Q2VPK5-3	Cytoplasmic tRNA 2-thiolation protein 2	CTU2
-0.666051387786865	-2.02257227897644	-0.0531621277332306	0.0656487420201302	0.2344920784235	1.0370911359787	0.289051175117493	1.11550259590149	Discard	Keep	+	1%_21%	+_Discard	+_Keep	8	8	8	27508	0	25328	180441491	827192544	0,218137219548225	-4.58427	1,33624554582104	-1,3380685094744	-2,50674512132421	Q9BTE7;H0YCN4;E9PM04;E9PQV9;E9PLH8;J3QQL8;E9PM78;H0YD80;E9PLS2	Q9BTE7;H0YCN4;E9PM04	DCN1-like protein 5;DCN1-like protein	DCUN1D5
-0.64537912607193	-0.633625626564026	0.536147713661194	-1.99769127368927	0.715224862098694	0.619116127490997	0.803648769855499	0.602558553218842	Discard	Keep	+	1%_21%	+_Discard	+_Keep	9	9	9	60101	0	2622	1213942376	3016604096	0,402420192956924	-2.48496	1,41128540123205	-1,37027415633202	-2,63518424719625	Q15392;Q3LIE7;Q15392-2;H7C4B7	Q15392;Q3LIE7;Q15392-2	Delta(24)-sterol reductase	DHCR24;Nbla03646
0.248294830322266	0.224099531769753	-1.33915197849274	-1.80552387237549	0.822570383548737	0.525585949420929	0.713869750499725	0.610255479812622	Discard	Keep	+	1%_21%	+_Discard	+_Keep	15	15	15	16384	0	22764	36428444	99228470	0,367116838693619	-2.72393	1,33191225735107	-1,33614076301455	-2,49936825566178	O75064;E9PAK5;H0YEF0	O75064;E9PAK5	DENN domain-containing protein 4B	DENND4B
-0.412785291671753	-0.358732223510742	-0.235256090760231	-2.06782627105713	0.835645020008087	0.755558729171753	0.730179131031036	0.753216922283173	Discard	Keep	+	1%_21%	+_Discard	+_Keep	8	8	8	32904	0	72833	60237098,5	426652928	0,141185253858566	-7.08289	1,90871468067802	-1,53729991987348	-3,53190943819831	Q9BU89;K7EIV2;K7ERU8	Q9BU89;K7EIV2;K7ERU8	Deoxyhypusine hydroxylase	DOHH
-0.255619406700134	-0.69977331161499	-0.0905747562646866	-2.00939559936523	0.747688293457031	0.571166396141052	0.813018560409546	0.923489809036255	Discard	Keep	+	1%_21%	+_Discard	+_Keep	6	6	6	11835	0	19158	216773368	948861920	0,228456184267998	-4.37721	1,87346064844746	-1,52768153324723	-3,46516541200199	Q9BW61	Q9BW61	DET1- and DDB1-associated protein 1	DDA1
-1.22749996185303	-0.980902493000031	0.0351292975246906	-1.06228804588318	0.219118982553482	1.36987543106079	1.06947553157806	0.57709127664566	Discard	Keep	+	1%_21%	+_Discard	+_Keep	16	16	16	42867	0	1522	926661776	1925646592	0,481221079826355	-2.07805	2,2536838753896	-1,61778060626239	-4,21762114925295	Q02127;I3NI32;J3QRQ3;I3L449;J3QRJ4	Q02127;I3NI32	Dihydroorotate dehydrogenase (quinone), mitochondrial	DHODH
-0.887992799282074	-1.03632366657257	-0.307322651147842	-1.21862053871155	0.211534291505814	1.06746244430542	1.17674875259399	0.994514107704163	Discard	Keep	+	1%_21%	+_Discard	+_Keep	21	21	21	1411	0	12689	315751072	761793344	0,414483904838562	-2.41264	2,9535119831305	-1,72512981295586	-5,83797154208325	Q2NKX8;B5MDQ0	Q2NKX8;B5MDQ0	DNA excision repair protein ERCC-6-like	ERCC6L
-0.31467592716217	-0.234984591603279	-0.692807912826538	-1.82548427581787	0.0781943500041962	0.965481400489807	0.860038697719574	1.1642382144928	Discard	Keep	+	1%_21%	+_Discard	+_Keep	3	3	3	12209	0	14998	276930984	1087905824	0,254554182291031	-3.92844	1,89641302973862	-1,53397634252906	-3,5085555017953	Q9NR33	Q9NR33	DNA polymerase epsilon subunit 4	POLE4
0.411315023899078	-1.09713447093964	-0.786231994628906	-1.34832274913788	-0.19766129553318	1.27060902118683	0.946905851364136	0.800520479679108	Discard	Keep	+	1%_21%	+_Discard	+_Keep	4	4	4	36966	0	36221	748085120	1182733008	0,632505476474762	-1.58101	1,5119205852286	-1,41018706187606	-2,80974297599067	Q06609;Q06609-3;Q06609-4;E9PNT5;Q06609-2;Q9NZG9;E9PI54;E9PJ30	Q06609;Q06609-3;Q06609-4;E9PNT5;Q06609-2	DNA repair protein RAD51 homolog 1	RAD51
-0.520325899124146	-1.06191253662109	-0.182158097624779	-1.60940074920654	0.544746458530426	1.0356537103653	0.87686413526535	0.916532933712006	Discard	Keep	+	1%_21%	+_Discard	+_Keep	25	24	24	15564	0	655	118456396	209449352	0,56556111574173	-1.76816	2,65678966200052	-1,68689863011241	-5,10801162981666	O14802;Q7Z755;R4GMX2	O14802	DNA-directed RNA polymerase III subunit RPC1	POLR3A
-0.984813332557678	-0.931150138378143	-1.3321795463562	-0.220229461789131	0.713192462921143	1.25255477428436	1.00959599018097	0.49302938580513	Discard	Keep	+	1%_21%	+_Discard	+_Keep	16	16	16	45745	0	32331	4071054016	6441667584	0,631987631320953	-1.58231	3,03550421212501	-1,73418627306819	-6,05236358616726	O60884;A0A087WT48;I3L320	O60884	DnaJ homolog subfamily A member 2	DNAJA2
-0.179236173629761	-1.43412387371063	-0.952570676803589	-0.889205396175385	0.617253661155701	1.14800155162811	0.637181520462036	1.05269944667816	Discard	Keep	+	1%_21%	+_Discard	+_Keep	11	11	11	52488	0	13719	331183016	747726576	0,442919939756393	-2.25774	2,9750637356199	-1,72756807506084	-5,89376537616752	Q96EY1;Q96EY1-2;Q96EY1-3;I3L1T6	Q96EY1;Q96EY1-2;Q96EY1-3	DnaJ homolog subfamily A member 3, mitochondrial	DNAJA3
-0.219917356967926	-2.08797669410706	-0.371613562107086	-0.356581687927246	0.75202739238739	0.84274822473526	0.642296671867371	0.799016892910004	Discard	Keep	+	1%_21%	+_Discard	+_Keep	5	4	4	36087	0	58464	252652204	1161957584	0,217436671257019	-4.59904	1,83916877597447	-1,51804462075233	-3,40077570245013	O75190;O75190-2;E9PH18;C9J2C4;O75190-3;C9JDX6;F8WCZ4;C9J2P2;O75190-4;C9JB42;C9JDR7;Q8WWF6;C9JN01	O75190;O75190-2;E9PH18;C9J2C4;O75190-3;C9JDX6;F8WCZ4;C9J2P2;O75190-4	DnaJ homolog subfamily B member 6	DNAJB6
-0.564438462257385	-0.611469328403473	-1.75434911251068	-0.30119976401329	0.188023537397385	1.0975741147995	0.918861508369446	1.02699756622314	Discard	Keep	+	1%_21%	+_Discard	+_Keep	24	24	16	71996	0	17664	749743584	1264060912	0,593123018741608	-1.68599	2,24353498373427	-1,61572834849358	-4,19652750447751	Q99543;Q99543-2;C9IZ83;F2Z3H0;F2Z3N9	Q99543;Q99543-2	DnaJ homolog subfamily C member 2;DnaJ homolog subfamily C member 2, N-terminally processed	DNAJC2
-0.805634319782257	-0.451887041330338	-1.42226696014404	-0.668081164360046	0.852452754974365	1.4927978515625	0.169773504137993	0.832845389842987	Discard	Keep	+	1%_21%	+_Discard	+_Keep	17	17	16	63182	0	66507	554891136	910850944	0,609200835227966	-1.64149	2,57039120516262	-1,67393474653363	-4,9079977106869	O95793;O95793-2;A0A087X1A5;Q5JW30;O95793-3;Q5JW28	O95793;O95793-2;A0A087X1A5;Q5JW30;O95793-3	Double-stranded RNA-binding protein Staufen homolog 1	STAU1
-1.35568451881409	-1.08595991134644	-0.0704115033149719	-0.942180991172791	0.932926833629608	1.0675493478775	0.618658602237701	0.835102021694183	Discard	Keep	+	1%_21%	+_Discard	+_Keep	8	8	2	23423	0	10636	1530724256	2478503680	0,61760014295578	-1.61917	2,97106119473693	-1,72711843252182	-5,88337361621699	Q8TEA8	Q8TEA8	D-tyrosyl-tRNA(Tyr) deacylase 1	DTD1
-0.23251785337925	-1.12894546985626	-0.546513617038727	-0.85355418920517	-0.636116921901703	1.507892370224	0.644699931144714	1.24505567550659	Discard	Keep	+	1%_21%	+_Discard	+_Keep	7	7	6	60089	0	1234	135117064	216522816	0,624031484127045	-1.60248	1,43687203442183	-1,38076554611325	-2,67930013324557	P49760;P49760-3;B1AVT0	P49760;P49760-3;B1AVT0	Dual specificity protein kinase CLK2	CLK2
-1.05657720565796	-1.56639993190765	-0.86678808927536	0.419184863567352	0.67434024810791	0.616313815116882	0.684595108032227	1.0953311920166	Discard	Keep	+	1%_21%	+_Discard	+_Keep	48	48	45	34348	0	30536	113515894	173932288	0,652644157409668	-1.53223	1,90126071357011	-1,53529018163681	-3,51775027358625	Q96L91;Q96L91-3;Q96L91-5;Q96L91-2;Q96L91-4;A0A0A0MR70;A0A0A0MR72;A0A0A0MR80	Q96L91;Q96L91-3;Q96L91-5;Q96L91-2;Q96L91-4	E1A-binding protein p400	EP400
-0.0360208228230476	-0.824597299098969	-0.897085011005402	-1.17472445964813	-0.409693658351898	1.24996674060822	0.718066990375519	1.37408757209778	Discard	Keep	+	1%_21%	+_Discard	+_Keep	15	15	15	72995	0	32331	122849744	198575488	0,618655145168304	-1.61641	1,6702777651999	-1,46621380932629	-3,09080170933078	Q9UKV5;H3BRK9;R4GNG2;H3BSK3	Q9UKV5;H3BRK9;R4GNG2	E3 ubiquitin-protein ligase AMFR	AMFR
-1.38735628128052	-1.03991520404816	-0.380717724561691	-0.742613196372986	0.586873710155487	0.881606161594391	1.10482454299927	0.977297842502594	Discard	Keep	+	1%_21%	+_Discard	+_Keep	36	36	36	28938	0	16933	63132413	169944936	0,371487468481064	-2.69188	3,49455862985277	-1,77530116587877	-7,36830076684744	Q9ULT8;A0A087X2H1;H0YJP0;G3V4V5;H0YJD4;A0A087WVU6	Q9ULT8;A0A087X2H1;H0YJP0;G3V4V5	E3 ubiquitin-protein ligase HECTD1	HECTD1
-0.0984837040305138	-0.014694239012897	-1.19752681255341	-1.65421748161316	0.0899891182780266	1.00902318954468	1.09503996372223	0.770870089530945	Discard	Keep	+	1%_21%	+_Discard	+_Keep	5	5	4	46286	0	76647	102997030	214374772	0,480453133583069	-2.08137	1,7206207513987	-1,48246114957146	-3,18201291779207	Q96FA3	Q96FA3	E3 ubiquitin-protein ligase pellino homolog 1	PELI1
-1.27449119091034	-0.594463288784027	-0.195689752697945	-1.33628165721893	1.21087074279785	0.554279148578644	1.02648723125458	0.6092888712883	Discard	Keep	+	1%_21%	+_Discard	+_Keep	4	4	4	25694	0	2973	157100484	480791088	0,326754122972488	-3.06041	2,75415919137761	-1,70046297088265	-5,33997302744769	Q9Y508;A0A096LNV3;A0A096LP02;Q9Y508-2	Q9Y508;A0A096LNV3;A0A096LP02;Q9Y508-2	E3 ubiquitin-protein ligase RNF114	RNF114
-1.53785359859467	0.197161316871643	-0.819941937923431	-0.877810776233673	-0.00704825483262539	0.830778002738953	1.03471601009369	1.17999911308289	Discard	Keep	+	1%_21%	+_Discard	+_Keep	3	3	2	19881	0	38642	277004264	479528240	0,577659904956818	-1.73112	1,84330676849491	-1,51922246674076	-3,40851822753327	Q99942	Q99942	E3 ubiquitin-protein ligase RNF5	RNF5
-0.281751662492752	-0.660315334796906	-1.87882208824158	-0.462559133768082	0.656467020511627	0.948492228984833	0.812626481056213	0.865862488746643	Discard	Keep	+	1%_21%	+_Discard	+_Keep	6	6	6	71669	0	33079	44261750	189806416	0,233194187283516	-4.28827	2,37882697585343	-1,64172410964966	-4,48278080230519	Q8WV44;D6REK2;Q8WV44-2;H0Y9T3;Q8WV44-4;Q8WV44-3;H0YAD6	Q8WV44;D6REK2;Q8WV44-2;H0Y9T3;Q8WV44-4	E3 ubiquitin-protein ligase TRIM41	TRIM41
-0.295313149690628	0.205708473920822	-0.623297452926636	-2.06416034698486	0.343847632408142	0.8831707239151	0.528367459774017	1.02167654037476	Discard	Keep	+	1%_21%	+_Discard	+_Keep	3	3	3	24115	0	723	91661210,5	237279060	0,386301308870316	-2.58865	1,45619702405637	-1,38853120803833	-2,71273636626524	Q8NHG8	Q8NHG8	E3 ubiquitin-protein ligase ZNRF2	ZNRF2
-0.827821910381317	-0.884617388248444	-1.06070554256439	-0.954473793506622	0.905078887939453	0.843601644039154	0.929814755916595	1.04912328720093	Discard	Keep	+	1%_21%	+_Discard	+_Keep	17	17	17	35079	0	27773	1162374384	8688974592	0,133775785565376	-7.47519	6,88048202231786	-1,86380930244923	-28,1969638566615	P13804;P13804-2;H0YK49;H0YNX6;H0YLU7;H0YL12;H0YKF0;H0YL83;H0YM12	P13804;P13804-2;H0YK49;H0YNX6;H0YLU7;H0YL12;H0YKF0	Electron transfer flavoprotein subunit alpha, mitochondrial	ETFA
-0.500414192676544	-0.343402951955795	-1.87512516975403	-0.261110931634903	0.281457245349884	0.472926378250122	1.47869455814362	0.746975064277649	Discard	Keep	+	1%_21%	+_Discard	+_Keep	14	12	12	24763	0	32331	1976656992	3059814528	0,646005511283875	-1.54797	1,74483296404296	-1,49002662301064	-3,22622818841808	P24534;C9JZW3;F8WF65;F2Z2G2	P24534	Elongation factor 1-beta	EEF1B2
-0.797065675258636	-0.962801277637482	-1.25852298736572	-0.515213310718536	0.91858571767807	1.1556339263916	1.1445324420929	0.314851135015488	Discard	Keep	+	1%_21%	+_Discard	+_Keep	26	26	26	83471	0	17632	1720204672	2737849856	0,628304958343506	-1.59158	3,38501275403121	-1,76680161803961	-7,03527229718035	Q96RP9;Q96RP9-2;C9IZ01;F8WAU4;C9JA25	Q96RP9;Q96RP9-2;C9IZ01;F8WAU4	Elongation factor G, mitochondrial	GFM1
-0.744226515293121	-0.252974033355713	-1.72576141357422	-0.589364767074585	0.9279904961586	0.74287223815918	1.20563471317291	0.435829192399979	Discard	Keep	+	1%_21%	+_Discard	+_Keep	2	2	2	35293	16166	72268	102185080	155801020	0,655869126319885	-1.52469	2,46101998854081	-1,65616334229708	-4,66225033627603	Q9NYP7;A0A0A0MTI6;Q9NYP7-2;Q9NYP7-3	Q9NYP7;A0A0A0MTI6;Q9NYP7-2;Q9NYP7-3	Elongation of very long chain fatty acids protein 5;Elongation of very long chain fatty acids protein	ELOVL5
-0.838568389415741	-0.580480933189392	-0.156981259584427	-1.65748906135559	0.176499173045158	0.928439140319824	1.18543422222137	0.943147003650665	Discard	Keep	+	1%_21%	+_Discard	+_Keep	12	12	12	28994	0	14926	1674668352	2666387904	0,62806624174118	-1.59219	2,24862506691193	-1,61675979569554	-4,20709933232184	P50402;Q5HY57;F8WEQ1	P50402;Q5HY57	Emerin	EMD
0.100005455315113	-0.0548542588949203	-0.685177505016327	-2.08306336402893	0.458479195833206	0.868924021720886	0.3520348072052	1.04365158081055	Discard	Keep	+	1%_21%	+_Discard	+_Keep	5	5	5	3262	0	34502	134570749	434634304	0,309618353843689	-3.22978	1,39043656026837	-1,36154481954873	-2,59936220733036	Q14249	Q14249	Endonuclease G, mitochondrial	ENDOG
-0.267592877149582	-1.31567978858948	-1.21018099784851	-0.536539256572723	1.06446707248688	0.502203226089478	0.37915912270546	1.38416349887848	Discard	Keep	+	1%_21%	+_Discard	+_Keep	13	13	13	87163	0	90617	50790962	178248728	0,284944295883179	-3.50946	2,51416489049584	-1,66499646008015	-4,78064874944851	P42892;P42892-3;B4DKB2;P42892-2;P42892-4	P42892;P42892-3;B4DKB2;P42892-2;P42892-4	Endothelin-converting enzyme 1	ECE1
-1.19944322109222	-1.02259016036987	-0.213966816663742	-0.907665610313416	1.49545085430145	0.838270127773285	0.818773627281189	0.191171139478683	Discard	Keep	+	1%_21%	+_Discard	+_Keep	7	7	7	28306	0	14645	294342768	677188528	0,434654116630554	-2.30068	2,55693640343995	-1,67183288931847	-4,87732490812587	O60344-4;O60344	O60344-4;O60344	Endothelin-converting enzyme 2;Methyltransferase-like region;Endothelin-converting enzyme 2 region	ECE2
-0.890751719474792	-0.614560484886169	-0.28452256321907	-1.28685450553894	-0.285609900951385	1.07303142547607	1.49002206325531	0.799245774745941	Discard	Keep	+	1%_21%	+_Discard	+_Keep	5	2	2	44563	15265	5166	5025136,5	30848458,75	0,162897497415543	-6.13883	1,91260849739358	-1,53834465891123	-3,53931607402254	H9KV84;Q6ZTU2-5;Q6ZTU2-6;Q6ZTU2;Q6ZTU2-4;Q6ZTU2-2;F2Z2G7;F5GWI7;F8WA08	H9KV84;Q6ZTU2-5;Q6ZTU2-6;Q6ZTU2;Q6ZTU2-4;Q6ZTU2-2;F2Z2G7	EP400 N-terminal-like protein	EP400NL
-1.33998131752014	-1.25639772415161	-0.192451626062393	-0.375005155801773	0.67572957277298	0.0660144314169884	1.3753867149353	1.04670512676239	Discard	Keep	+	1%_21%	+_Discard	+_Keep	3	3	3	27347	0	94541	114740312	175657892	0,653203308582306	-1.53092	2,08757744024379	-1,5819179173559	-3,87967473826466	Q5UCC4;M0R2A0;Q5UCC4-2	Q5UCC4;M0R2A0;Q5UCC4-2	ER membrane protein complex subunit 10	EMC10
-1.29123818874359	-0.400245398283005	-0.537465512752533	-1.01226663589478	-0.149795159697533	1.15881252288818	1.08208131790161	1.15011703968048	Discard	Keep	+	1%_21%	+_Discard	+_Keep	8	8	8	34833	0	58359	620220072	1229883536	0,504291713237762	-1.98298	2,26780639607095	-1,62060786411166	-4,24707382818215	Q15006;H0YAS9;E5RGJ2	Q15006	ER membrane protein complex subunit 2	EMC2
-0.786746144294739	-0.827042102813721	-1.61457121372223	-0.0900399461388588	0.491689115762711	0.675070881843567	1.26267492771149	0.888964414596558	Discard	Keep	+	1%_21%	+_Discard	+_Keep	23	23	23	98795	0	16637	187182118	362271912	0,516689538955688	-1.9354	2,47902960361855	-1,65919968672097	-4,70216181099224	Q9H501;A0A087WX71	Q9H501;A0A087WX71	ESF1 homolog	ESF1
-1.18700468540192	-0.686870157718658	-1.45491683483124	0.56283175945282	1.2638201713562	0.335175633430481	0.967656373977661	0.199307680130005	Discard	Keep	+	1%_21%	+_Discard	+_Keep	5	5	5	50968	0	57918	232715318	507481216	0,458569318056107	-2.1807	1,44234863671404	-1,38297994434834	-2,6887654257243	Q9HBU6;H0YH69;Q9HBU6-2;H0YFP7	Q9HBU6;H0YH69	Ethanolamine kinase 1	ETNK1
-0.709699809551239	-1.60067045688629	-0.568926930427551	-0.268313974142075	-0.0728283375501633	1.01886987686157	0.911501944065094	1.2900675535202	Discard	Keep	+	1%_21%	+_Discard	+_Keep	13	10	10	54261	0	18142	79199246	175862754	0,450346916913986	-2.22051	2,05299189486231	-1,57380555197597	-3,81118484678367	Q15723-4;Q15723-2;Q15723-3;Q15723;Q15723-1;D6R9B1;D6RHI1	Q15723-4;Q15723-2;Q15723-3;Q15723;Q15723-1	ETS-related transcription factor Elf-2	ELF2
-0.258289307355881	-1.0887998342514	-0.509537220001221	-1.33935308456421	1.40518450737	0.753143906593323	-0.0353303551673889	1.07298147678375	Discard	Keep	+	1%_21%	+_Discard	+_Keep	17	4	4	68882	43573	38215	27532684	86203076	0,319393306970596	-3.13094	2,1591970417455	-1,5979897454381	-4,02351515435887	Q8IYD1	Q8IYD1	Eukaryotic peptide chain release factor GTP-binding subunit ERF3B	GSPT2
0.0476873926818371	-2.18048357963562	-0.548726677894592	-0.0828990340232849	0.633330941200256	0.689553439617157	0.81985729932785	0.621680200099945	Discard	Keep	+	1%_21%	+_Discard	+_Keep	3	3	1	12732	0	2026	2880872072	8797353600	0,327470302581787	-3.05371	1,44044363998054	-1,38221094477922	-2,6854720702441	P41567;K7EM18	P41567;K7EM18	Eukaryotic translation initiation factor 1	EIF1
-1.33224833011627	-0.840507686138153	-0.78635036945343	-0.633039116859436	0.735546231269836	1.3096638917923	0.926476955413818	0.620458424091339	Discard	Keep	+	1%_21%	+_Discard	+_Keep	28	28	28	64989	0	23827	2018799904	3627198464	0,556572735309601	-1.79671	3,81033168742815	-1,79607275128365	-8,40285749599052	Q9BY44;F8WAE5;Q9BY44-4;Q9BY44-3;Q9BY44-2;C9IZE1;H7C5R5;H7C5Q3;F8WF18;F8WAT3	Q9BY44;F8WAE5;Q9BY44-4;Q9BY44-3;Q9BY44-2	Eukaryotic translation initiation factor 2A;Eukaryotic translation initiation factor 2A, N-terminally processed	EIF2A
-1.31059181690216	-1.06433701515198	-1.17529559135437	0.409462720155716	0.633455455303192	0.687894940376282	1.09807002544403	0.721341371536255	Discard	Keep	+	1%_21%	+_Discard	+_Keep	7	7	7	25059	0	79369	2826461888	4575848192	0,617691338062286	-1.61893	2,0386868585791	-1,57038087397814	-3,78303646494081	Q9UBQ5;K7ERF1;Q9UBQ5-2;K7ES31;A0A087WVB9;K7EQM4;K7EK53;B4DQ48	Q9UBQ5;K7ERF1;Q9UBQ5-2;K7ES31;A0A087WVB9	Eukaryotic translation initiation factor 3 subunit K	EIF3K
-0.621596932411194	-0.784136950969696	-0.770248234272003	-1.22297012805939	0.0256394054740667	1.13060224056244	0.880508780479431	1.36220180988312	Discard	Keep	+	1%_21%	+_Discard	+_Keep	62	1	1	17151	1	-2	21105339,5	60402808	0,349409908056259	-2.86197	2,74681122489676	-1,69947612052783	-5,32221870390004	Q04637-3;Q04637;Q04637-9;Q04637-5;Q04637-4;Q04637-6;C9J6B6;C9JF13;H7C044;H7C0V6;C9JHW9;C9J556;C9JSU8;C9JWW9;F8WCF2;C9JIH5;C9JWH7;C9JWH9;B1AN91;B1AN92	Q04637-3;Q04637;Q04637-9;Q04637-5;Q04637-4;Q04637-6	Eukaryotic translation initiation factor 4 gamma 1	EIF4G1
-1.08425402641296	-0.749184250831604	-0.295278936624527	-1.20578420162201	0.298046618700027	1.29360949993134	0.401849299669266	1.34099614620209	Discard	Keep	+	1%_21%	+_Discard	+_Keep	9	9	9	28362	0	14029	656132304	1378436400	0,475997507572174	-2.10085	2,52810498184103	-1,66725074499846	-4,81201982129047	O60573;C9JEL3;B9A044;B8ZZ50;O60573-2;B8ZZL3;B4E1E4;B9A023	O60573;C9JEL3;B9A044;B8ZZ50;O60573-2;B8ZZL3;B4E1E4;B9A023	Eukaryotic translation initiation factor 4E type 2	EIF4E2
-1.11786019802094	-0.323491334915161	-1.10750472545624	-0.792481482028961	0.0296960957348347	1.09499478340149	1.36764132976532	0.849005460739136	Discard	Keep	+	1%_21%	+_Discard	+_Keep	6	6	6	30039	0	16972	705652240	1189699328	0,593134939670563	-1.68596	2,54954771533411	-1,67066885251552	-4,86053444245694	Q96B26;H7C581	Q96B26	Exosome complex component RRP43	EXOSC8
-1.44011068344116	-0.189709439873695	-0.175831064581871	-1.31445896625519	1.15228044986725	1.1696959733963	0.64085727930069	0.157276421785355	Discard	Keep	+	1%_21%	+_Discard	+_Keep	3	3	3	82254	15186	50477	16042365,75	33903134,5	0,47318235039711	-2.11335	1,99656771906405	-1,56005506962538	-3,70075601498411	Q93063;Q93063-2;Q93063-3;E9PNL9;E9PJA5	Q93063;Q93063-2;Q93063-3;E9PNL9	Exostosin-2	EXT2
-0.495664328336716	-0.783184409141541	-1.74148523807526	-0.0195870995521545	0.175349473953247	1.32551980018616	1.03000092506409	0.509050905704498	Discard	Keep	+	1%_21%	+_Discard	+_Keep	13	13	13	9741	0	4799	136895940	221653404	0,617612600326538	-1.61914	1,84590687959719	-1,51996054500341	-3,41338706222872	Q53R41;Q53R41-2;C9JMM4;E7EW60;C9JTP4	Q53R41;Q53R41-2	FAST kinase domain-containing protein 1	FASTKD1
-0.434204041957855	-0.370377391576767	-2.01165843009949	-0.294772982597351	0.603829920291901	0.849916756153107	0.628142774105072	1.02912330627441	Discard	Keep	+	1%_21%	+_Discard	+_Keep	14	14	14	81462	0	14894	316984588	594817024	0,532911062240601	-1.87649	1,97847697118131	-1,55550640076399	-3,66568482979854	Q9NYY8;Q9NYY8-2	Q9NYY8;Q9NYY8-2	FAST kinase domain-containing protein 2	FASTKD2
-0.812085330486298	-1.09443211555481	-0.882392585277557	-0.583969175815582	0.806443870067596	0.285275816917419	1.72774279117584	0.553416728973389	Discard	Keep	+	1%_21%	+_Discard	+_Keep	7	7	7	10358	15959	67128	33885093	66137423	0,51234370470047	-1.95181	2,65362501896592	-1,68643960356712	-5,10059066700691	Q86XK2;Q86XK2-6;Q86XK2-5;Q86XK2-3;A0A0A0MR53;H0YAV3;Q86XK2-2;C9IYF0;Q86XK2-4	Q86XK2;Q86XK2-6;Q86XK2-5;Q86XK2-3;A0A0A0MR53	F-box only protein 11	FBXO11
-0.847411155700684	-1.67044007778168	0.0301487166434526	-0.427738159894943	1.33746385574341	-0.145091280341148	0.943119943141937	0.779948174953461	Discard	Keep	+	1%_21%	+_Discard	+_Keep	6	6	6	41149	0	79083	30823766,75	87687148	0,351519763469696	-2.84479	1,64481169190491	-1,45772034255788	-3,04502155162301	Q9NVF7;Q9NVF7-2;B4E0H5	Q9NVF7;Q9NVF7-2	F-box only protein 28	FBXO28
-1.26657605171204	-0.663811981678009	-1.13246464729309	0.331528514623642	-0.0449445880949497	0.794450342655182	1.68581128120422	0.296007037162781	Discard	Keep	+	1%_21%	+_Discard	+_Keep	5	5	5	6463	0	99998	35226441	64878761	0,542957961559296	-1.84176	1,40022126851128	-1,36566205974668	-2,61616041400646	Q6PJ61	Q6PJ61	F-box only protein 46	FBXO46
-1.12815272808075	-0.39404708147049	-0.370844304561615	-1.44440054893494	0.203421369194984	1.02161002159119	1.18263375759125	0.929779469966888	Discard	Keep	+	1%_21%	+_Discard	+_Keep	6	6	6	75706	0	1515	102429326	168193124	0,60899829864502	-1.64204	2,53729087234842	-1,66872232034802	-4,83276442735143	Q6PCT2;H3BVB1;H3BME1;H7C112;H3BPZ0;Q6PCT2-2;Q6PCT2-3;H3BPI8	Q6PCT2;H3BVB1;H3BME1;H7C112;H3BPZ0;Q6PCT2-2;Q6PCT2-3	F-box/LRR-repeat protein 19	FBXL19
-0.882490336894989	-0.0794739127159119	-1.37727451324463	-1.06701385974884	0.514899253845215	0.822087168693542	0.813713133335114	1.25555300712585	Discard	Keep	+	1%_21%	+_Discard	+_Keep	6	6	6	51217	0	2702	81638458	131436570	0,621124386787415	-1.60998	2,77420915780323	-1,70312629640102	-5,38862941989042	Q9BZ67;Q9BZ67-2;E9PS62;Q9BZ67-3;Q9BZ68;E9PRP1;Q8N4M4;E9PRA3	Q9BZ67;Q9BZ67-2;E9PS62;Q9BZ67-3;Q9BZ68	FERM domain-containing protein 8;Putative FERM domain-containing protein FRMD8P1	FRMD8;FRMD8P1
-0.30560576915741	-0.488317400217056	-0.594826877117157	-1.57582247257233	1.82183134555817	0.414524585008621	0.170373663306236	0.557842969894409	Discard	Keep	+	1%_21%	+_Discard	+_Keep	12	12	11	11863	0	20747	89826874	136208840	0,659479081630707	-1.51635	1,7200669092916	-1,48228627070785	-3,18100420224876	Q9Y4F1;C9JME2;Q9Y4F1-2;M0QXT1;M0R262;M0QYB0;H0Y783	Q9Y4F1;C9JME2;Q9Y4F1-2	FERM, RhoGEF and pleckstrin domain-containing protein 1	FARP1
-2.07814168930054	-0.301277160644531	-0.445797353982925	-0.202828928828239	0.90395051240921	0.669128358364105	0.84444934129715	0.610516846179962	Discard	Keep	+	1%_21%	+_Discard	+_Keep	7	7	7	20019	0	40468	209807555,75	1585320096	0,132343977689743	-7.55607	1,82514836022664	-1,51402254775167	-3,37459742034201	P02792;A0A087X1B9	P02792;A0A087X1B9	Ferritin light chain;Ferritin	FTL
-0.344425618648529	-1.47977161407471	-0.393399745225906	-0.530710518360138	-0.146543398499489	1.70646607875824	0.039395447820425	1.14898931980133	Discard	Keep	+	1%_21%	+_Discard	+_Keep	23	23	23	26262	0	32331	152460090	389830192	0,391093581914902	-2.55693	1,42067853339373	-1,37415373604745	-2,65135966357179	P02751;P02751-14;P02751-8;P02751-3;P02751-5;P02751-10;P02751-6;P02751-9;P02751-17;P02751-11;P02751-7;P02751-15;P02751-4;P02751-13;P02751-12;H0Y7Z1;H0Y4K8;P02751-2;P02751-16	P02751;P02751-14;P02751-8;P02751-3;P02751-5;P02751-10;P02751-6;P02751-9;P02751-17;P02751-11;P02751-7;P02751-15;P02751-4;P02751-13;P02751-12;H0Y7Z1	Fibronectin;Anastellin;Ugl-Y1;Ugl-Y2;Ugl-Y3	FN1
-1.27775120735168	-0.313974857330322	-1.14006125926971	-0.091266393661499	0.151897549629211	-0.116332709789276	1.25401437282562	1.53347456455231	Discard	Keep	+	1%_21%	+_Discard	+_Keep	10	8	8	74076	0	93381	33623189,5	56003557	0,600375950336456	-1.66562	1,51546061127303	-1,41152687370777	-2,81593663348817	Q6PIW4;Q6PIW4-2	Q6PIW4;Q6PIW4-2	Fidgetin-like protein 1	FIGNL1
-1.17939293384552	-0.700028300285339	-0.943510055541992	-0.660317301750183	0.282131195068359	1.47722005844116	1.01207268238068	0.711824595928192	Discard	Keep	+	1%_21%	+_Discard	+_Keep	81	72	71	27816	0	32331	371125936	570233704	0,650831282138824	-1.5365	3,10710117934588	-1,74162428081036	-6,24439448200437	O75369;O75369-8;O75369-2;O75369-9;O75369-6;O75369-3;E7EN95;O75369-5;O75369-4;O75369-7;A0A0A0MT44;H7C5L4;A0A0C4DGA1	O75369;O75369-8;O75369-2;O75369-9;O75369-6;O75369-3;E7EN95;O75369-5;O75369-4;O75369-7	Filamin-B	FLNB
-0.643994271755219	-1.07802844047546	-0.173715323209763	-1.20154178142548	-0.215443670749664	0.958344876766205	0.850956499576569	1.50342226028442	Discard	Keep	+	1%_21%	+_Discard	+_Keep	2	2	2	51995	15184	50433	4488525,25	9384869,25	0,478272527456284	-2.09086	1,95168101295362	-1,54863994568586	-3,61402865188306	Q96SL8	Q96SL8	Flt3-interacting zinc finger protein 1	FIZ1
-0.0954188704490662	-2.05896925926208	-0.461975276470184	-0.419458895921707	0.922773718833923	0.823051810264587	0.620482444763184	0.66951447725296	Discard	Keep	+	1%_21%	+_Discard	+_Keep	12	12	12	64608	0	14516	54915441,75	315481616	0,174068599939346	-5.74486	1,83870110874846	-1,51791118830442	-3,39990112627062	Q05932;Q05932-3;Q05932-2;Q05932-4;Q5JU21;Q5JU20;Q5JU23	Q05932;Q05932-3;Q05932-2;Q05932-4	Folylpolyglutamate synthase, mitochondrial	FPGS
-0.60562801361084	-0.731147766113281	-1.7768657207489	0.0069683869369328	0.203114047646523	0.814996778964996	1.20983505249023	0.878727197647095	Discard	Keep	+	1%_21%	+_Discard	+_Keep	14	11	11	74222	0	28879	199247010	372087624	0,535484135150909	-1.86747	1,96994363626956	-1,55333654757123	-3,64919713564267	P51116;I3L1Z2	P51116	Fragile X mental retardation syndrome-related protein 2	FXR2
-1.13165581226349	-0.599507629871368	-0.185646906495094	-1.27409255504608	0.865016996860504	-0.0790159106254578	1.03527629375458	1.36962556838989	Discard	Keep	+	1%_21%	+_Discard	+_Keep	3	3	3	54567	99024	31905	21610417,5	36037423	0,599665999412537	-1.66759	2,14759777517029	-1,59545146301389	-4,00003117777844	Q9H9S5;M0R1M1	Q9H9S5	Fukutin-related protein	FKRP
-1.96088206768036	-0.990417301654816	-0.0622085146605968	0.317355394363403	0.994773983955383	0.672742903232574	0.292702376842499	0.735933244228363	Discard	Keep	+	1%_21%	+_Discard	+_Keep	2	2	2	17177	0	60932	329960644	616278160	0,535408616065979	-1.86773	1,35902130677793	-1,3480762494728	-2,54558716358907	Q8IVP5	Q8IVP5	FUN14 domain-containing protein 1	FUNDC1
-0.26835373044014	-0.924530744552612	-0.582204341888428	-1.40230298042297	0.531274914741516	0.138388499617577	0.852579772472382	1.65514862537384	Discard	Keep	+	1%_21%	+_Discard	+_Keep	18	18	18	52228	0	221	924494000	1406912992	0,657108128070831	-1.52182	2,11726173961972	-1,58869590237737	-3,93895849423449	Q92917	Q92917	G patch domain and KOW motifs-containing protein	GPKOW
-0.0836705937981606	-0.408786058425903	-0.944815695285797	-1.73836374282837	1.30989015102386	0.657394289970398	0.475195705890656	0.733155906200409	Discard	Keep	+	1%_21%	+_Discard	+_Keep	6	6	6	36688	15359	54148	91348407	180498012	0,506090939044952	-1.97593	2,11337539809701	-1,58781803585589	-3,93117029015186	Q13227;I3L4X7;Q13227-2;I3L3Y9	Q13227;I3L4X7;Q13227-2;I3L3Y9	G protein pathway suppressor 2	GPS2
-0.548532545566559	-0.766714692115784	-1.86439764499664	0.0584523268043995	0.434161096811295	0.755838871002197	1.02611494064331	0.905077517032623	Discard	Keep	+	1%_21%	+_Discard	+_Keep	10	10	10	48337	0	10149	515273744	1072482656	0,480449467897415	-2.08138	1,99873858279527	-1,560596245341	-3,70497527932563	P14635;E9PC90;P14635-2;D6RHI0;H0YA62	P14635;E9PC90;P14635-2;D6RHI0	G2/mitotic-specific cyclin-B1	CCNB1
0.600984573364258	-1.13502144813538	-1.38294148445129	-1.07616853713989	0.856961786746979	0.729361951351166	0.593981444835663	0.812841713428497	Discard	Keep	+	1%_21%	+_Discard	+_Keep	11	11	11	34746	0	55982	407982954	1707789696	0,238895311951637	-4.18593	1,76620136341253	-1,49657344818115	-3,26544386785515	Q99747;Q99747-2;J3KTJ6;J3QS28;J3QKW4	Q99747;Q99747-2	Gamma-soluble NSF attachment protein	NAPG
-0.627568304538727	-1.95690429210663	0.311897248029709	-0.509526908397675	0.0932573676109314	0.909832954406738	0.868877470493317	0.910134553909302	Discard	Keep	+	1%_21%	+_Discard	+_Keep	5	5	5	18824	0	15497	120831651,5	389545452	0,310186266899109	-3.22387	1,4625406560531	-1,3910511508584	-2,72373466241479	Q8WXD5;B9A037;B8ZZ85	Q8WXD5	Gem-associated protein 6	GEMIN6
-9.9262993899174E-05	-1.37925112247467	-1.62017560005188	-0.0189326647669077	0.396407842636108	0.896491408348083	0.756184279918671	0.969375133514404	Discard	Keep	+	1%_21%	+_Discard	+_Keep	1	1	1	14536	0	35328	69464875,25	364126004	0,190771520137787	-5.24187	1,80865682413181	-1,50922932867616	-3,34391293117918	Q9H840	Q9H840	Gem-associated protein 7	GEMIN7
-0.859354615211487	0.245639786124229	-1.2652153968811	-1.09642899036407	0.800332069396973	0.0296845342963934	1.54994714260101	0.595395445823669	Discard	Keep	+	1%_21%	+_Discard	+_Keep	7	7	2	62031	0	23591	59583024	104572476	0,569777309894562	-1.75507	1,73726729209874	-1,48767960211262	-3,21238728725381	P32780;E9PI26;E9PL58;F5H0Y9	P32780	General transcription factor IIH subunit 1	GTF2H1
-0.57619845867157	-0.134622752666473	-2.03914594650269	-0.32943794131279	0.783165454864502	0.830165266990662	0.787886381149292	0.67818808555603	Discard	Keep	+	1%_21%	+_Discard	+_Keep	12	12	12	54389	0	17516	123344784	879934688	0,140174925327301	-7.13394	1,91768850405489	-1,5397025719285	-3,54898953842587	Q9NZM5;M0QZ34;M0QYZ9;M0QZU5;M0QX73	Q9NZM5;M0QZ34	Glioma tumor suppressor candidate region gene 2 protein	GLTSCR2
-0.607281506061554	-0.514151632785797	-1.98698151111603	0.0732476338744164	0.65269947052002	1.0038458108902	0.568120419979095	0.810501337051392	Discard	Keep	+	1%_21%	+_Discard	+_Keep	5	5	5	42064	0	48343	69021671	215021568	0,320998817682266	-3.11528	1,83755307454642	-1,51758351363242	-3,39775461002712	P15104;A0A087WYJ1	P15104	Glutamine synthetase	GLUL
-1.48980450630188	-1.22343409061432	0.503417909145355	-0.776764333248138	0.401375591754913	0.74401992559433	0.827746510505676	1.01344299316406	Discard	Keep	+	1%_21%	+_Discard	+_Keep	7	7	7	42924	0	16938	1810051264	2936989248	0,616294860839844	-1.6226	1,75544349837633	-1,49329251050949	-3,24567788509228	Q9NXS2;Q9NXS2-3;K7EQG1	Q9NXS2;Q9NXS2-3;K7EQG1	Glutaminyl-peptide cyclotransferase-like protein	QPCTL
-0.216627016663551	-0.410848557949066	-0.388433218002319	-1.78482007980347	1.13448083400726	1.04610168933868	0.971188366413116	-0.351042002439499	Discard	Keep	+	1%_21%	+_Discard	+_Keep	2	2	2	93794	9915	3223	835700056	6475503888	0,129055589437485	-7.7486	1,48630226501208	-1,40036443993449	-2,76503294685931	Q9HCL2;Q5VW52	Q9HCL2;Q5VW52	Glycerol-3-phosphate acyltransferase 1, mitochondrial	GPAM
-0.315439164638519	-0.824072182178497	-0.858698010444641	-1.24695563316345	0.35297417640686	0.833728134632111	0.325379610061646	1.73308312892914	Discard	Keep	+	1%_21%	+_Discard	+_Keep	10	10	10	32767	0	41883	365950208	575830696	0,635517001152039	-1.57352	2,27776834849226	-1,62258251011372	-4,26792019889589	Q9H4A5;Q5T5I6;Q9H4A5-2	Q9H4A5;Q5T5I6;Q9H4A5-2	Golgi phosphoprotein 3-like	GOLPH3L
-0.878759026527405	-0.592865765094757	-1.46005046367645	-0.590671598911285	0.424176275730133	1.05200755596161	1.11144244670868	0.934720575809479	Discard	Keep	+	1%_21%	+_Discard	+_Keep	5	5	5	28612	0	49244	552391576	925136240	0,597092092037201	-1.67478	3,31736371201539	-1,76117342710495	-6,83581036578801	O95249;E9PCW1;B4DQA8;K7EJC8;G5E9T8;A0A087WYX5;O95249-2;F6RU00;Q96QI9	O95249;E9PCW1;B4DQA8;K7EJC8;G5E9T8;A0A087WYX5;O95249-2	Golgi SNAP receptor complex member 1	GOSR1
-1.11754858493805	-1.04944980144501	-0.716490983963013	-0.804558575153351	1.16160500049591	0.925067901611328	0.770783364772797	0.83059173822403	Discard	Keep	+	1%_21%	+_Discard	+_Keep	37	37	37	26114	0	35425	102260384	488249632	0,20944282412529	-4.77457	5,13820758200781	-1,84402398765087	-14,3141606004072	Q13439;Q13439-5;Q13439-3;Q13439-4;H0Y6I0;C9JHJ5;E7EVX2;A0A087WTW2;Q86W71	Q13439;Q13439-5;Q13439-3;Q13439-4;H0Y6I0	Golgin subfamily A member 4	GOLGA4
-0.0866665244102478	-0.334073454141617	-2.05945730209351	-0.305847138166428	0.922456622123718	0.261163324117661	0.387109667062759	1.2153148651123	Discard	Keep	+	1%_21%	+_Discard	+_Keep	12	12	7	24862	0	49397	6728614,25	15398761,75	0,436958104372025	-2.28855	1,46752774846906	-1,39302222430706	-2,73238899163372	Q3T8J9;Q3T8J9-3;A0A087WUE6;Q3T8J9-2;A4PB68	Q3T8J9;Q3T8J9-3;A0A087WUE6;Q3T8J9-2	GON-4-like protein	GON4L
-1.55084919929504	-0.213243871927261	-0.0127697624266148	-1.2569545507431	0.725379407405853	0.128979578614235	0.929314434528351	1.25014388561249	Discard	Keep	+	1%_21%	+_Discard	+_Keep	9	9	9	80679	0	24859	143522364	256110016	0,560393393039703	-1.78446	1,8351920440115	-1,51690867263824	-3,39334190992354	Q96CP6;M0QZ12;Q96CP6-2;Q96CP6-3;S4R3I2;M0R0J9	Q96CP6;M0QZ12;Q96CP6-2;Q96CP6-3	GRAM domain-containing protein 1A	GRAMD1A
-0.0951712802052498	-0.51073831319809	-2.20289373397827	0.15503191947937	0.782978236675262	0.416620016098022	0.795554876327515	0.658618330955505	Discard	Keep	+	1%_21%	+_Discard	+_Keep	6	6	6	63544	0	12084	57841247,5	228943420	0,252644300460815	-3.95813	1,31134360022232	-1,32688571698964	-2,46440816020203	P28799;P28799-3;K7EKL3;K7EQ05;P28799-2;K7EQI0	P28799;P28799-3;K7EKL3;K7EQ05;P28799-2	Granulins;Acrogranin;Paragranulin;Granulin-1;Granulin-2;Granulin-3;Granulin-4;Granulin-5;Granulin-6;Granulin-7	GRN
-1.99323034286499	-0.390375792980194	-0.625107288360596	-0.00706919794902205	0.467143833637238	0.841359257698059	0.629675805568695	1.07760381698608	Discard	Keep	+	1%_21%	+_Discard	+_Keep	6	6	6	76615	0	12892	13737160,5	85140441	0,161347061395645	-6.19782	1,80409455530493	-1,50789133401122	-3,33544463858372	Q13480;Q13480-2;B7Z3B9;H0Y8F4;D6RIF8;D6RIS0	Q13480;Q13480-2;B7Z3B9	GRB2-associated-binding protein 1	GAB1
-0.858170092105865	0.249567538499832	-0.804632663726807	-1.74387335777283	0.760886013507843	0.860283732414246	0.852060794830322	0.683877944946289	Discard	Keep	+	1%_21%	+_Discard	+_Keep	16	16	1	53126	0	23913	246247377,5	2588489472	0,0951316878199577	-10.5117	2,07311539457966	-1,57855426520109	-3,8509600159123	Q12849;H0Y8R1;H0YAK1;Q12849-5;H0YAM1	Q12849;H0Y8R1;H0YAK1;Q12849-5	G-rich sequence factor 1	GRSF1
-0.603080093860626	-2.07266712188721	0.315194755792618	-0.417203187942505	0.839721202850342	0.616218209266663	0.428010135889053	0.893806219100952	Discard	Keep	+	1%_21%	+_Discard	+_Keep	12	12	12	8781	0	12109	37607905,25	139306248	0,269965678453445	-3.70417	1,45706768215989	-1,38887785375118	-2,71424520737064	Q96CN9	Q96CN9	GRIP and coiled-coil domain-containing protein 1	GCC1
-1.06357109546661	-0.662658214569092	-0.382269620895386	-1.16468691825867	0.91909396648407	1.32689619064331	-0.116529926657677	1.14372563362122	Discard	Keep	+	1%_21%	+_Discard	+_Keep	4	4	4	25431	15372	29664	160548180	357046848	0,449655771255493	-2.22392	2,3509023689275	-1,63659292832017	-4,42278396354247	Q8TAA5;D6RGI6	Q8TAA5	GrpE protein homolog 2, mitochondrial	GRPEL2
-1.70087790489197	0.0272067598998547	-1.42206406593323	0.286920785903931	0.559604048728943	0.764033496379852	0.711724281311035	0.773452699184418	Discard	Keep	+	1%_21%	+_Discard	+_Keep	12	12	12	48349	0	50505	373194013	1401892000	0,2662073969841	-3.75647	1,49677562957728	-1,40440723765641	-2,78328788239467	O75616;J3QSB2;J3QRV9;O75616-2;J3QT61;K7EQJ8	O75616;J3QSB2;J3QRV9;O75616-2	GTPase Era, mitochondrial	ERAL1
-1.42585122585297	-0.457540720701218	-0.755569517612457	-0.92572009563446	1.00056755542755	0.634052157402039	0.786096572875977	1.14396524429321	Discard	Keep	+	1%_21%	+_Discard	+_Keep	16	16	16	42932	0	7874	322346396	664681792	0,484963476657867	-2.06201	3,59304493734619	-1,78234077244997	-7,67873058877177	A4D1E9;A4D1E9-2;C9J8R7;C9JNI1;C9JEQ8;F8WBY0;F8WCN4;F8WBB5;A4D1E9-3	A4D1E9;A4D1E9-2;C9J8R7;C9JNI1;C9JEQ8	GTP-binding protein 10	GTPBP10
-0.567591905593872	-0.173844441771507	-1.76240491867065	-0.483815044164658	-0.0742170661687851	0.886892020702362	1.36145412921906	0.813527226448059	Discard	Keep	+	1%_21%	+_Discard	+_Keep	5	5	5	37138	0	95252	27334426,75	140692334	0,194285109639168	-5.14707	1,75719296100316	-1,49382815510035	-3,24888908215393	Q8IYK8	Q8IYK8	GTP-binding protein REM 2	REM2
-0.681095123291016	-1.0086977481842	-1.28180837631226	-0.691206276416779	0.79631906747818	0.865262746810913	1.07993388175964	0.921291828155518	Discard	Keep	+	1%_21%	+_Discard	+_Keep	19	19	19	61992	0	4295	1001644816	2417586880	0,414315938949585	-2.41362	4,63773854401283	-1,83140376210213	-11,7420082167226	Q9BVP2;Q9BVP2-2;C9JYH9;C9JZT7;B4DMU5	Q9BVP2;Q9BVP2-2	Guanine nucleotide-binding protein-like 3	GNL3
-0.23997674882412	-0.122263364493847	-2.24079632759094	-0.069912388920784	0.780305087566376	0.527753174304962	0.885601043701172	0.479289501905441	Discard	Keep	+	1%_21%	+_Discard	+_Keep	20	20	20	65572	0	11693	197798954	598939832	0,330248475074768	-3.02802	1,33266095438872	-1,33647440932691	-2,50064252088935	Q9NVN8	Q9NVN8	Guanine nucleotide-binding protein-like 3-like protein	GNL3L
-0.613057792186737	-0.81771457195282	-0.923409521579742	-0.646888852119446	-0.162515833973885	0.416514903306961	1.96988105773926	0.777190625667572	Discard	Keep	+	1%_21%	+_Discard	+_Keep	9	9	9	51927	0	60873	295580768	507005360	0,582993388175964	-1.71529	1,77932631530581	-1,50053537264466	-3,28962273975929	P48723	P48723	Heat shock 70 kDa protein 13	HSPA13
-0.93793135881424	-0.59344345331192	-1.59976017475128	-0.34756600856781	0.896139025688171	1.06277287006378	0.741950452327728	0.777838706970215	Discard	Keep	+	1%_21%	+_Discard	+_Keep	1	1	1	85435	0	45263	40323790	124160642	0,324771136045456	-3.07909	3,08477789622659	-1,73935051262379	-6,18402901801509	O75506	O75506	Heat shock factor-binding protein 1	HSBP1
-0.237049743533134	-0.142643555998802	-1.69109034538269	-1.17020583152771	0.592500030994415	0.872128188610077	0.937670350074768	0.838690936565399	Discard	Keep	+	1%_21%	+_Discard	+_Keep	2	2	2	10143	0	25972	392186728	773407760	0,507089197635651	-1.97204	2,26723792448722	-1,62049474567175	-4,24588601160191	Q9Y241;C9JAW5;C9JNU6;Q9Y241-2	Q9Y241;C9JAW5;C9JNU6;Q9Y241-2	HIG1 domain family member 1A, mitochondrial	HIGD1A
-1.26158916950226	-0.506070613861084	-0.496328115463257	-0.564698815345764	-0.590769827365875	1.12426435947418	0.735209345817566	1.55998289585114	Discard	Keep	+	1%_21%	+_Discard	+_Keep	7	6	6	48847	0	54297	91792950	153787108	0,596883296966553	-1.67537	1,52293880139215	-1,41434337198734	-2,82903310590707	O15379;O15379-2;E7ESJ6	O15379;O15379-2	Histone deacetylase 3	HDAC3
0.407854825258255	-1.13653004169464	-1.23166418075562	-1.11029827594757	0.672889292240143	0.280082553625107	0.962101221084595	1.15556466579437	Discard	Keep	+	1%_21%	+_Discard	+_Keep	19	19	19	59338	0	18844	10648922,75	17334881,25	0,614306032657623	-1.62785	1,90136685943177	-1,53531885147095	-3,51795172414156	O14686;O14686-3;H0YEF2	O14686;O14686-3	Histone-lysine N-methyltransferase 2D	KMT2D
-1.3085241317749	-1.14460980892181	0.238407000899315	-0.719410717487335	0.0191449075937271	0.737342774868011	0.59479945898056	1.58285057544708	Discard	Keep	+	1%_21%	+_Discard	+_Keep	23	23	23	18603	0	89787	24124634,5	50095035	0,481577336788177	-2.07651	1,67287296821653	-1,46706884354353	-3,09548040359423	O15047;C9J2Z9	O15047	Histone-lysine N-methyltransferase SETD1A	SETD1A
-0.328628778457642	-1.90869438648224	-0.266923367977142	-0.302545726299286	-0.143406182527542	1.0085186958313	1.25664722919464	0.685032546520233	Discard	Keep	+	1%_21%	+_Discard	+_Keep	23	23	23	28759	0	43233	31509538	53441354	0,589609682559967	-1.69604	1,49414698802316	-1,40339613705873	-2,77870315857926	Q9BYW2;H7C3H4;Q9BYW2-2;C9JG86;Q9BYW2-3;H7BXT4;H7BZ93	Q9BYW2;H7C3H4;Q9BYW2-2;C9JG86;Q9BYW2-3;H7BXT4;H7BZ93	Histone-lysine N-methyltransferase SETD2	SETD2
-1.59138786792755	-0.628669500350952	-0.316806823015213	-0.333673059940338	0.547854423522949	0.645112276077271	1.7707507610321	-0.0931802615523338	Discard	Keep	+	1%_21%	+_Discard	+_Keep	18	18	18	67256	0	72369	192683640	301139440	0,639848589897156	-1.56287	1,58010282356938	-1,43526861257851	-2,92972565845983	Q86TU7;Q6NXR6;Q86TU7-3;Q86TU7-2;C9K0W5	Q86TU7;Q6NXR6;Q86TU7-3;Q86TU7-2	Histone-lysine N-methyltransferase setd3	SETD3
-1.23402869701385	-1.56834423542023	-0.00858026742935181	-0.492260634899139	0.667551279067993	0.960012316703796	0.882125079631805	0.793525218963623	Discard	Keep	+	1%_21%	+_Discard	+_Keep	16	14	0	40921	0	32331	1613821376	3757403776	0,429504424333572	-2.32826	2,43448159595064	-1,65160693228245	-4,6038267468761	P01892;A0A0G2JNY4	P01892;A0A0G2JNY4	HLA class I histocompatibility antigen, A-2 alpha chain	HLA-A
-0.938489258289337	-1.44308388233185	-0.868621408939362	-0.300116539001465	0.930677175521851	0.776037096977234	1.03215205669403	0.811444699764252	Discard	Keep	+	1%_21%	+_Discard	+_Keep	6	6	6	43719	0	14479	117063416	415159240	0,281972318887711	-3.54645	3,49259918716905	-1,77515552937984	-7,36223211937757	Q15011;Q15011-4;Q15011-2;Q15011-3;H3BTA8;H3BTT7;H3BP08;H3BRS4;H3BV54;H3BQM2	Q15011;Q15011-4;Q15011-2;Q15011-3	Homocysteine-responsive endoplasmic reticulum-resident ubiquitin-like domain member 1 protein	HERPUD1
-0.848028242588043	-0.883229970932007	-0.648699045181274	-1.14711964130402	1.24503040313721	1.19179284572601	0.860770046710968	0.229483485221863	Discard	Keep	+	1%_21%	+_Discard	+_Keep	14	14	14	65033	0	26805	325817368	540591912	0,60270482301712	-1.65919	3,34535113824424	-1,76353842020035	-6,9177693618574	Q969P0;Q969P0-3;C9J8Z4;Q969P0-2	Q969P0;Q969P0-3;C9J8Z4	Immunoglobulin superfamily member 8	IGSF8
-1.48807966709137	-0.455152481794357	-0.0675260946154594	-0.883612215518951	0.0209575165063143	1.51673543453217	0.143589973449707	1.21308755874634	Discard	Keep	+	1%_21%	+_Discard	+_Keep	5	5	5	71729	0	37832	108081182	165326852	0,653742492198944	-1.52965	1,61399081129767	-1,44718523556367	-2,98992552434243	Q9Y6Y0;H0Y5Y2;X6R674	Q9Y6Y0	Influenza virus NS1A-binding protein	IVNS1ABP
-1.57951378822327	0.401764929294586	-0.0896620526909828	-1.53841018676758	0.718680560588837	0.702791929244995	0.705352485179901	0.678996026515961	Discard	Keep	+	1%_21%	+_Discard	+_Keep	7	7	7	21445	0	12185	1308813512	3985274240	0,328412413597107	-3.04495	1,49288678368465	-1,40291052497923	-2,77650590742719	Q9BY32;Q9BY32-3;Q9BY32-2	Q9BY32;Q9BY32-3	Inosine triphosphate pyrophosphatase	ITPA
-1.10601985454559	-0.856508016586304	-0.84854131937027	-0.791003286838531	0.591255187988281	0.873392879962921	1.45647263526917	0.680951654911041	Discard	Keep	+	1%_21%	+_Discard	+_Keep	9	9	9	38681	0	15245	208795656	414139488	0,504167437553406	-1.98347	3,89896731367099	-1,80103620886803	-8,7146590217794	Q9NX62;H0YB38;H0YBS3	Q9NX62	Inositol monophosphatase 3	IMPAD1
-1.32699692249298	-0.643435478210449	-0.884834229946136	-0.725351929664612	0.902171075344086	1.27208018302917	0.921091377735138	0.485275954008102	Discard	Keep	+	1%_21%	+_Discard	+_Keep	3	3	3	86902	0	72279	18447253,25	62997334	0,292825937271118	-3.415	3,71458619150642	-1,79030928760767	-8,07691353445541	P26010;F5H6T4;P26010-2;F8VNX4	P26010;F5H6T4;P26010-2;F8VNX4	Integrin beta-7;Integrin beta	ITGB7
-1.25258469581604	-1.02446138858795	0.16213920712471	-1.10289800167084	0.182229921221733	0.927592813968658	0.945809185504913	1.16217291355133	Discard	Keep	+	1%_21%	+_Discard	+_Keep	11	11	11	57825	0	18246	4605937792	7178004352	0,641673862934113	-1.55842	2,21037960218859	-1,60890242829919	-4,12803141112247	P05362;E7ESS4;K7EKL8	P05362;E7ESS4	Intercellular adhesion molecule 1	ICAM1
-1.90871846675873	-0.219972431659698	-0.461673587560654	-0.589206218719482	0.433424800634384	0.875508368015289	1.0837858915329	0.786851644515991	Discard	Keep	+	1%_21%	+_Discard	+_Keep	15	15	15	5948	0	31689	858424968	1575563648	0,544836759567261	-1.83541	2,12210244304124	-1,58978535234928	-3,94867054095273	Q7Z5L9-2;Q7Z5L9	Q7Z5L9-2;Q7Z5L9	Interferon regulatory factor 2-binding protein 2	IRF2BP2
-1.08493459224701	-0.890631914138794	-1.16495299339294	-0.323838412761688	1.19490933418274	0.922889649868011	1.11006355285645	0.236495316028595	Discard	Keep	+	1%_21%	+_Discard	+_Keep	14	14	14	51772	0	21125	2138264064	3386069248	0,631488561630249	-1.58356	3,01686273564579	-1,73217894136906	-6,00310969367966	Q15306;Q15306-2;F2Z3D5	Q15306;Q15306-2;F2Z3D5	Interferon regulatory factor 4	IRF4
-0.976214110851288	-1.21359288692474	0.188069492578506	-1.2698872089386	0.888784825801849	1.17351925373077	0.722771823406219	0.486548840999603	Discard	Keep	+	1%_21%	+_Discard	+_Keep	22	18	18	82088	0	98757	240949980	475362896	0,506875872612	-1.97287	2,34670980514114	-1,63581236451864	-4,41381797168898	P20592	P20592	Interferon-induced GTP-binding protein Mx2	MX2
-0.276972383260727	-1.70097625255585	-0.340981781482697	-0.597880423069	1.23156821727753	0.34458401799202	1.3851912021637	-0.0445326678454876	Discard	Keep	+	1%_21%	+_Discard	+_Keep	11	11	11	11669	0	96647	36704349	94047563	0,390274316072464	-2.5623	1,64684497634783	-1,45840540248901	-3,04866814010037	Q9BYX4;Q9BYX4-2	Q9BYX4	Interferon-induced helicase C domain-containing protein 1	IFIH1
-1.89591264724731	-0.868552207946777	0.033070158213377	-0.326065301895142	1.01505863666534	0.777003407478333	0.866179287433624	0.399218618869781	Discard	Keep	+	1%_21%	+_Discard	+_Keep	12	12	12	5049	0	35439	179847266	445946440	0,403293430805206	-2.47958	1,87725243848192	-1,52872998733073	-3,47231721681081	Q8TCB0;C9JUM8;H7C1F3;Q8TCB0-2	Q8TCB0;C9JUM8	Interferon-induced protein 44	IFI44
-1.21174705028534	-1.35256886482239	-0.504424631595612	-0.468952149152756	0.887574791908264	1.10874092578888	0.877575039863586	0.663801908493042	Discard	Keep	+	1%_21%	+_Discard	+_Keep	10	10	10	51322	0	8327	92492111	489772344	0,188847154378891	-5.29529	3,41051376750408	-1,76884634047747	-7,11167448177424	Q53G44;H7C1K6;Q53G44-2;C9JPJ0	Q53G44;H7C1K6;Q53G44-2	Interferon-induced protein 44-like	IFI44L
-0.0243701320141554	-1.02472698688507	-1.03513264656067	-1.23789310455322	0.877166926860809	0.466505855321884	0.541296303272247	1.43715369701385	Discard	Keep	+	1%_21%	+_Discard	+_Keep	14	14	1	76059	0	11215	71360255	112217794	0,635908544063568	-1.57255	2,49020448915097	-1,66106141312048	-4,7270350254842	D3YTB5;P51617-3;P51617-4;P51617-2;F8WAB6;H7C2I6;H7C1F0	D3YTB5;P51617-3;P51617-4;P51617-2;F8WAB6	Interleukin-1 receptor-associated kinase 1	IRAK1
-1.54755902290344	-0.784280240535736	-0.0521481968462467	-0.595437049865723	-0.261441498994827	1.24717164039612	0.893157064914703	1.10053741931915	Discard	Keep	+	1%_21%	+_Discard	+_Keep	1	1	1	63357	57531	18425	85589427	143172378	0,597806811332703	-1.67278	1,74381685708643	-1,48971228394657	-3,2243679665419	Q01638;E9PC41;Q01638-3;Q01638-2	Q01638;E9PC41;Q01638-3;Q01638-2	Interleukin-1 receptor-like 1	IL1RL1
0.0362816341221333	-0.804798901081085	-2.07477831840515	0.0688963085412979	0.762989580631256	0.866558074951172	0.40946564078331	0.735385954380035	Discard	Keep	+	1%_21%	+_Discard	+_Keep	4	4	4	64177	0	85158	81613188	132586452	0,615546941757202	-1.62457	1,45285958136559	-1,38719963189214	-2,70695456585043	A0AVF1;B7Z2T3;A0AVF1-3;B7Z6R6;A0AVF1-2;F8WEZ4;Q96CU4	A0AVF1;B7Z2T3;A0AVF1-3;B7Z6R6;A0AVF1-2	Intraflagellar transport protein 56	TTC26
-1.61270952224731	-1.30794942378998	-0.224667921662331	-0.0242530815303326	0.764593839645386	0.845732927322388	0.532777547836304	1.02647578716278	Discard	Keep	+	1%_21%	+_Discard	+_Keep	37	36	32	17129	0	28615	520243104	857006192	0,607047080993652	-1.64732	2,10006618329868	-1,5847900127992	-3,90455966261188	O60306;H0YH15	O60306	Intron-binding protein aquarius	AQR
-1.11714446544647	-1.20903170108795	0.564702451229095	-1.22779154777527	0.357851356267929	0.749152183532715	0.901583194732666	0.980678617954254	Discard	Keep	+	1%_21%	+_Discard	+_Keep	19	19	19	10504	0	83918	64004399,5	273546556	0,233979910612106	-4.27387	1,75982571712633	-1,49463265389204	-3,2537239181127	P48200;A0A0A6YY96;P48200-2;H0YNL8;H0YLE0;H0YMA8;H0YL48;H0YN46	P48200;A0A0A6YY96	Iron-responsive element-binding protein 2	IREB2
-0.14455908536911	-0.43976616859436	-1.97739732265472	-0.273987531661987	0.00396211445331573	1.18469750881195	0.680999398231506	0.966051042079926	Discard	Keep	+	1%_21%	+_Discard	+_Keep	7	7	7	45069	0	13662	131131944	525221708	0,249669700860977	-4.00529	1,53233270904026	-1,41785504296422	-2,84550896983604	Q9UKU7;Q9UKU7-2;Q9UKU7-3	Q9UKU7;Q9UKU7-2;Q9UKU7-3	Isobutyryl-CoA dehydrogenase, mitochondrial	ACAD8
-1.99466514587402	0.0143539002165198	-0.329738676548004	-0.47704616189003	-0.0428798422217369	0.978732049465179	1.0014408826828	0.849803030490875	Discard	Keep	+	1%_21%	+_Discard	+_Keep	8	8	8	57891	0	20296	171862364	301026496	0,570921063423157	-1.75156	1,46886185641303	-1,39354805112816	-2,73470532286846	Q8TBB5;Q8TBB5-3;Q8TBB5-2;H3BQH3;H3BV82;H3BP99;H3BQ90;H3BQL0;Q9UF94	Q8TBB5;Q8TBB5-3;Q8TBB5-2;H3BQH3	Kelch domain-containing protein 4	KLHDC4
-0.550494611263275	-0.25845742225647	-0.0656019821763039	-2.04300117492676	0.247490450739861	0.968919515609741	0.900544404983521	0.800600707530975	Discard	Keep	+	1%_21%	+_Discard	+_Keep	7	7	7	58143	0	26253	18683098,5	93555214	0,19970129430294	-5.00748	1,64795088137467	-1,45877756737173	-3,05065214616454	Q9NVX7;Q9NVX7-2;A0A075B6T4;E9PL18;E9PQ38;E9PJ66;E9PJY1;E9PM58	Q9NVX7;Q9NVX7-2;A0A075B6T4	Kelch repeat and BTB domain-containing protein 4	KBTBD4
-1.19898808002472	-1.75125753879547	0.240131929516792	-0.223960697650909	0.332363486289978	0.826819002628326	0.983590543270111	0.791301250457764	Discard	Keep	+	1%_21%	+_Discard	+_Keep	10	10	10	68822	0	15126	183693688	316739232	0,579952478408813	-1.72428	1,67277660349915	-1,46703716740012	-3,09530663048353	Q8NFY9;C9JAA6;Q8NFY9-2;C9J331	Q8NFY9	Kelch repeat and BTB domain-containing protein 8	KBTBD8
-1.01341271400452	-0.143915951251984	-1.46122014522552	-0.319139391183853	-0.18614599108696	0.60257750749588	1.52440011501312	0.99685662984848	Discard	Keep	+	1%_21%	+_Discard	+_Keep	11	11	11	71813	0	72603	71294120	129389418	0,55100429058075	-1.81487	1,67827999447238	-1,4688441157341	-3,10523632956162	Q96EK5;A0A0D9SFK7	Q96EK5	KIF1-binding protein	KIAA1279
-1.01093482971191	-0.78152596950531	-0.159174233675003	-1.14991140365601	-0.232390075922012	1.15872991085052	0.729013562202454	1.44619309902191	Discard	Keep	+	1%_21%	+_Discard	+_Keep	21	21	21	10028	0	59065	121845848	211800916	0,575284838676453	-1.73827	1,95994128421613	-1,55077323317528	-3,62991575059945	O95235;O95235-2;D6RBN1;D6R9E4;H0YAC9	O95235;O95235-2	Kinesin-like protein KIF20A	KIF20A
-1.6955292224884	0.543751418590546	-0.147244676947594	-1.38690888881683	0.721977412700653	0.86954391002655	0.610817432403564	0.483592569828033	Discard	Keep	+	1%_21%	+_Discard	+_Keep	18	18	17	91054	0	51174	38202444,25	97111416	0,393387764692307	-2.54202	1,34733160234001	-1,34296567365527	-2,5256367092321	A0A0C4DGP2;Q86Y91-2;Q86Y91;A0A0C4DGP5;Q86Y91-3;Q86Y91-4	A0A0C4DGP2;Q86Y91-2;Q86Y91;A0A0C4DGP5;Q86Y91-3;Q86Y91-4	Kinesin-like protein;Kinesin-like protein KIF18B	KIF18B
-0.970030605792999	-1.44898867607117	-0.981413900852203	-0.00386767950840294	0.611583530902863	0.874225437641144	0.865240752696991	1.0532511472702	Discard	Keep	+	1%_21%	+_Discard	+_Keep	9	1	1	22478	0	12115	303860616	909140544	0,334228426218033	-2.99197	2,76682512151447	-1,70215043268399	-5,37067408138296	Q8NBT2;Q8NBT2-2	Q8NBT2;Q8NBT2-2	Kinetochore protein Spc24	SPC24
-1.14154481887817	-0.595877170562744	-0.340580701828003	-1.23080992698669	0.315763384103775	1.16354501247406	1.45504415035248	0.374459981918335	Discard	Keep	+	1%_21%	+_Discard	+_Keep	6	6	6	2543	0	14762	280377740	583735184	0,480316668748856	-2.08196	2,45071802472686	-1,65440628677607	-4,63951612154516	Q9BXK1;A0A087WWX5	Q9BXK1;A0A087WWX5	Krueppel-like factor 16	KLF16
-1.36717581748962	-0.225634589791298	-0.764029562473297	-1.15459406375885	0.963943421840668	1.00840294361115	0.897277653217316	0.641810059547424	Discard	Keep	+	1%_21%	+_Discard	+_Keep	19	19	19	75225	0	13863	154627562	424853800	0,363954782485962	-2.74759	3,25506416984174	-1,75571702793241	-6,6561619806203	Q9H089;H7C2X7;F8WFC6	Q9H089	Large subunit GTPase 1 homolog	LSG1
-1.54596900939941	-1.60248076915741	0.342124104499817	0.0354149304330349	0.656393527984619	0.687835693359375	0.681311964988708	0.745369493961334	Discard	Keep	+	1%_21%	+_Discard	+_Keep	9	9	9	30529	0	13639	405037352	1295983200	0,312532871961594	-3.19966	1,44850269070653	-1,3854553559795	-2,69941130642369	Q96BZ8	Q96BZ8	Leukocyte receptor cluster member 1	LENG1
-2.03881430625916	-0.444091141223907	-0.577607035636902	0.278334081172943	0.278062164783478	0.843799293041229	0.646749556064606	1.01356732845306	Discard	Keep	+	1%_21%	+_Discard	+_Keep	3	3	3	37251	0	15599	262967324	432286392	0,608317375183105	-1.64388	1,46263664368465	-1,39108918607235	-2,72390116795002	P48059;P48059-4;P48059-5;P48059-2;P48059-3;Q7Z4I7;Q7Z4I7-2;H0Y592;A0A087X2F9;Q7Z4I7-4;Q7Z4I7-3;Q7Z4I7-5	P48059;P48059-4;P48059-5;P48059-2;P48059-3	LIM and senescent cell antigen-like-containing domain protein 1	LIMS1
-0.915961802005768	-0.508277237415314	-1.05910694599152	-0.936069309711456	0.840271830558777	0.0761433616280556	1.4252462387085	1.07775390148163	Discard	Keep	+	1%_21%	+_Discard	+_Keep	17	17	16	85225	0	83301	186297380	352354424	0,528721511363983	-1.89135	2,82518812337056	-1,70970765687525	-5,51375328309951	Q9UHB6;F8VQE1;Q9UHB6-2;Q9UHB6-4;Q9UHB6-5;F8VS07;Q9UHB6-3;F8VRN8	Q9UHB6;F8VQE1;Q9UHB6-2;Q9UHB6-4;Q9UHB6-5;F8VS07;Q9UHB6-3	LIM domain and actin-binding protein 1	LIMA1
-0.246309459209442	-1.23282301425934	-0.705052971839905	-1.18327653408051	0.751189529895782	1.4841787815094	0.805155575275421	0.326938062906265	Discard	Keep	+	1%_21%	+_Discard	+_Keep	1	1	1	76193	32141	22393	4421636	13378745,5	0,330497056245804	-3.02575	2,63511360768719	-1,68373098224401	-5,05732810008915	Q7Z4F1;H0YHW7;Q7Z4F1-2	Q7Z4F1;H0YHW7;Q7Z4F1-2	Low-density lipoprotein receptor-related protein 10	LRP10
-0.902675151824951	-0.903963446617126	-1.65574312210083	0.276045590639114	0.772057950496674	0.839699566364288	0.856294095516205	0.718284547328949	Discard	Keep	+	1%_21%	+_Discard	+_Keep	10	10	10	36085	0	28903	538873048	872684608	0,617488861083984	-1.61946	2,1372581744861	-1,59316807240248	-3,97915948374865	Q96KB5;Q96KB5-2;E5RFX4;E5RIE1	Q96KB5;Q96KB5-2;E5RFX4	Lymphokine-activated killer T-cell-originated protein kinase	PBK
-1.43114185333252	-0.148397773504257	-1.35277092456818	-0.136544540524483	0.549335300922394	0.520478665828705	1.50470745563507	0.494333624839783	Discard	Keep	+	1%_21%	+_Discard	+_Keep	16	16	12	51588	0	44085	147503146	336764968	0,438000291585922	-2.2831	1,89807558678361	-1,53442753478885	-3,51170772479009	Q1ED39;H3BPL4;H3BMC9	Q1ED39	Lysine-rich nucleolar protein 1	KNOP1
-1.09208810329437	-1.36073338985443	-1.01271295547485	0.0663125365972519	0.979272902011871	0.723024129867554	0.802379548549652	0.894545197486877	Discard	Keep	+	1%_21%	+_Discard	+_Keep	24	24	1	11374	0	22747	93183330	221893460	0,419946253299713	-2.38126	2,74781239338043	-1,69961092248559	-5,32463531749144	O00754;M0QZ24;M0R174;M0QYZ1	O00754	Lysosomal alpha-mannosidase;Lysosomal alpha-mannosidase A peptide;Lysosomal alpha-mannosidase B peptide;Lysosomal alpha-mannosidase C peptide;Lysosomal alpha-mannosidase D peptide;Lysosomal alpha-mannosidase E peptide	MAN2B1
-0.349256604909897	-2.05885243415833	-0.154330089688301	-0.448954612016678	0.858614802360535	0.578200995922089	1.01376783847809	0.560810029506683	Discard	Keep	+	1%_21%	+_Discard	+_Keep	2	2	2	51208	30157	48269	87644370	157218580	0,557468295097351	-1.79382	1,79665008514494	-1,50569685176015	-3,32164530854197	Q9H3U5;H7C593;Q9H3U5-2;Q9H3U5-3;H7C5U3;Q9H3U5-5;Q9H3U5-6	Q9H3U5;H7C593;Q9H3U5-2;Q9H3U5-3;H7C5U3;Q9H3U5-5;Q9H3U5-6	Major facilitator superfamily domain-containing protein 1	MFSD1
-1.07386457920074	-0.504264891147614	-1.12821912765503	-0.734799742698669	0.115393027663231	0.882292330265045	1.18491208553314	1.25855100154877	Discard	Keep	+	1%_21%	+_Discard	+_Keep	4	4	4	26638	16595	83047	529929720	933324160	0,567787408828735	-1.76122	2,91421396610496	-1,72057419642806	-5,73724314874292	O75352;J3QS48;I3L295;J3KT75;J3QW43;J3QRD5;Q9H3L2;Q1HDL3;A0A087WV81;O75352-2;J3KSI4;I3L1D2;I3L4E0;J3KTK8;J3QQZ4;I3L405;I3L261	O75352;J3QS48;I3L295;J3KT75;J3QW43;J3QRD5;Q9H3L2;Q1HDL3;A0A087WV81;O75352-2;J3KSI4;I3L1D2;I3L4E0;J3KTK8;J3QQZ4;I3L405;I3L261	Mannose-P-dolichol utilization defect 1 protein	MPDU1;HBEBP2BPA
0.180991858243942	-0.699239194393158	-1.50445663928986	-0.655138850212097	-0.40855348110199	0.727835297584534	0.787078559398651	1.57148241996765	Discard	Keep	+	1%_21%	+_Discard	+_Keep	2	2	2	15805	0	9442	106539282	182833370	0,582712411880493	-1.71611	1,33816829767046	-1,338921405375	-2,51001968686916	Q9Y3C7;I3L0P8;I3L2J1	Q9Y3C7;I3L0P8;I3L2J1	Mediator of RNA polymerase II transcription subunit 31	MED31
0.23580676317215	-0.762135326862335	-1.88469803333282	-0.634186863899231	0.788153231143951	0.665382564067841	0.994114935398102	0.597562730312347	Discard	Keep	+	1%_21%	+_Discard	+_Keep	4	4	4	14686	0	18508	286496284	478134776	0,599195659160614	-1.6689	1,85527764154897	-1,52260673046112	-3,43095879379487	Q8N4V1;Q8N4V1-2	Q8N4V1;Q8N4V1-2	Membrane magnesium transporter 1	MMGT1
-0.331198155879974	-0.619000196456909	-1.99678111076355	-0.107786171138287	0.413102149963379	0.927965760231018	0.792662680149078	0.921035051345825	Discard	Keep	+	1%_21%	+_Discard	+_Keep	10	10	10	69689	0	1896	35845849,25	79983948	0,448163002729416	-2.23133	1,87238260605869	-1,52738281898201	-3,46313325838852	P35240;P35240-6;P35240-8;P35240-3;P35240-2;P35240-4;P35240-5;P35240-7;P35240-10;P35240-9	P35240;P35240-6;P35240-8;P35240-3;P35240-2;P35240-4;P35240-5;P35240-7	Merlin	NF2
-0.642083406448364	-1.483731508255	-0.199605152010918	-1.00431561470032	0.667315483093262	1.39738631248474	0.89673638343811	0.368297606706619	Discard	Keep	+	1%_21%	+_Discard	+_Keep	6	6	6	61436	0	17891	5022627,75	18097710,75	0,277528375387192	-3.60324	2,51337448791829	-1,66486786678433	-4,77887396690583	Q7Z3K6;Q7Z3K6-3;Q7Z3K6-2;Q7Z3K6-4;A8MQD4;Q7Z3K6-5	Q7Z3K6;Q7Z3K6-3;Q7Z3K6-2;Q7Z3K6-4	Mesoderm induction early response protein 3	MIER3
-0.898372709751129	-0.951630473136902	-0.726785361766815	-0.898401618003845	0.0334778763353825	1.10871756076813	1.17587220668793	1.15712261199951	Discard	Keep	+	1%_21%	+_Discard	+_Keep	12	12	12	6659	0	12538	251915824	524529544	0,480270057916641	-2.08216	3,06781099194528	-1,73759510461241	-6,13844763867729	Q96GW9	Q96GW9	Methionine--tRNA ligase, mitochondrial	MARS2
0.21038056910038	-2.13583970069885	-0.150288954377174	-0.642414748668671	0.414565056562424	0.868161797523499	0.680046916007996	0.755389034748077	Discard	Keep	+	1%_21%	+_Discard	+_Keep	6	6	6	46538	0	13305	78941155,75	225779072	0,349638938903809	-2.86009	1,38462351886981	-1,35908140987158	-2,58939374527883	Q8IVH4;Q495G5;D6RIS5	Q8IVH4;Q495G5;D6RIS5	Methylmalonic aciduria type A protein, mitochondrial	MMAA
-1.03612792491913	-0.944087266921997	-0.765887081623077	-0.908111572265625	0.976398885250092	0.94068855047226	1.24060797691345	0.496518492698669	Discard	Keep	+	1%_21%	+_Discard	+_Keep	4	4	4	26215	0	26251	632709328	1246045456	0,507773876190186	-1.96938	4,50371278233076	-1,82710693776608	-11,1304091064342	P54105;E9PMI6;J3KN38;E9PJF4	P54105;E9PMI6;J3KN38;E9PJF4	Methylosome subunit pICln	CLNS1A
-1.20695459842682	-0.743517935276031	-0.0610603801906109	-1.12209987640381	-0.180902913212776	1.13576447963715	1.21467888355255	0.964092195034027	Discard	Keep	+	1%_21%	+_Discard	+_Keep	8	8	8	39149	0	66572	692252928	1078750560	0,641717314720154	-1.55832	2,0239779509219	-1,56681635882705	-3,75420154424471	Q9BV20;Q9BV20-2	Q9BV20;Q9BV20-2	Methylthioribose-1-phosphate isomerase	MRI1
-1.12610948085785	-0.953371047973633	-0.58629184961319	-0.550706744194031	-0.259030193090439	1.24236488342285	0.926953375339508	1.3061910867691	Discard	Keep	+	1%_21%	+_Discard	+_Keep	13	13	13	78767	0	20854	76029800	280947410	0,270619302988052	-3.69523	2,20720783844647	-1,60823956876993	-4,12151178524296	Q8N6R0;Q8N6R0-4;Q8N6R0-1;Q8N6R0-3;Q8N6R0-2	Q8N6R0;Q8N6R0-4;Q8N6R0-1;Q8N6R0-3	Methyltransferase-like protein 13	METTL13
-1.37989068031311	-1.32256579399109	-0.10583870112896	-0.591522872447968	0.854315876960754	0.997778058052063	0.950608670711517	0.597115457057953	Discard	Keep	+	1%_21%	+_Discard	+_Keep	3	3	3	43426	37185	20973	121823132	241075996	0,505330860614777	-1.9789	2,75002913119788	-1,69990902766585	-5,32998879276792	Q6P1Q9;Q6P1Q9-2;Q96IZ6;A0A087WW35;H7C552;Q96IZ6-2	Q6P1Q9;Q6P1Q9-2;Q96IZ6;A0A087WW35	Methyltransferase-like protein 2B;Methyltransferase-like protein 2A	METTL2B;METTL2A
-0.724846184253693	-1.2681450843811	-0.973380088806152	-0.11780671030283	0.0221774000674486	0.809739053249359	0.529243648052216	1.7230179309845	Discard	Keep	+	1%_21%	+_Discard	+_Keep	4	4	4	36536	0	10175	95114984	198999352	0,477966278791428	-2.0922	1,92666984878123	-1,54208902502432	-3,56612128438055	Q9H1A3;H3BN86;Q8TD49;Q9H1A3-2;H3BM54;H3BQD2	Q9H1A3;H3BN86;Q8TD49;Q9H1A3-2;H3BM54	Methyltransferase-like protein 9	METTL9;PAP1
-0.622490584850311	-0.674824655056	-1.45047521591187	-0.688773691654205	0.441873133182526	1.36222732067108	1.12883806228638	0.503625631332397	Discard	Keep	+	1%_21%	+_Discard	+_Keep	33	2	2	85251	15755	62163	2376488,5	5255489,25	0,452191710472107	-2.21145	2,89489949206075	-1,71828207373619	-5,68820739839234	P27816-5;H7C4C5	P27816-5;H7C4C5	Microtubule-associated protein 4;Microtubule-associated protein	MAP4
-0.870995759963989	-0.565604507923126	-0.858576595783234	-0.974365770816803	-0.252979040145874	1.28735911846161	1.20603370666504	1.02912902832031	Discard	Keep	+	1%_21%	+_Discard	+_Keep	3	3	3	2617	16472	79681	30592194,5	112558004	0,271790504455566	-3.6793	2,34114092986738	-1,63477136194706	-4,40192544823233	Q96EH3	Q96EH3	Mitochondrial assembly of ribosomal large subunit protein 1	MALSU1
-0.336254060268402	-0.0544454157352448	-2.10680818557739	-0.375696659088135	0.334459602832794	1.00491440296173	0.711480319499969	0.822350025177002	Discard	Keep	+	1%_21%	+_Discard	+_Keep	8	8	8	35407	0	2953	35500786,5	127747882	0,277897268533707	-3.59845	1,58384549108348	-1,43660216778517	-2,93635524297704	Q9H2D1;E5RGK5;E5RFL3;E5RGT9	Q9H2D1;E5RGK5;E5RFL3;E5RGT9	Mitochondrial folate transporter/carrier	SLC25A32
-1.72974073886871	-0.268861651420593	-0.424288749694824	-0.91864550113678	1.11716961860657	0.808370172977448	0.645844578742981	0.77015233039856	Discard	Keep	+	1%_21%	+_Discard	+_Keep	5	5	5	16298	0	21947	3936579392	6533782528	0,602496206760406	-1.65976	2,55017740920751	-1,67076833546162	-4,86196392149502	Q15388	Q15388	Mitochondrial import receptor subunit TOM20 homolog	TOMM20
-1.17984902858734	-1.01493048667908	-1.09333968162537	-0.235112562775612	1.18390023708344	0.729736506938934	0.583811342716217	1.02578365802765	Discard	Keep	+	1%_21%	+_Discard	+_Keep	8	8	8	48547	0	72855	1218384448	2016741376	0,604135155677795	-1.65526	3,32255224559963	-1,76161587610841	-6,85094530135137	Q15070;S4R3Q9;J3KNA0;Q15070-2;E7EVY0;C9JC63;Q15070-3	Q15070;S4R3Q9;J3KNA0;Q15070-2;E7EVY0	Mitochondrial inner membrane protein OXA1L	OXA1L
-1.49881827831268	0.403232485055923	-0.766456186771393	-0.856080293655396	1.587486743927	0.353309720754623	0.790881216526031	-0.0135554084554315	Discard	Keep	+	1%_21%	+_Discard	+_Keep	3	3	3	57563	15348	29527	16081400	31095769	0,517157196998596	-1.93365	1,38457584883079	-1,35906113660894	-2,58931203292248	Q86UD5;B7Z676;E9PE63;Q86UD5-2;D6RGJ7;A0A0C4DGB3	Q86UD5;B7Z676;E9PE63;Q86UD5-2;D6RGJ7	Mitochondrial sodium/hydrogen exchanger 9B2	SLC9B2
-1.19129145145416	-0.917755544185638	-0.171508297324181	-1.13147437572479	0.26840540766716	1.13964819908142	1.16026067733765	0.843715310096741	Discard	Keep	+	1%_21%	+_Discard	+_Keep	9	9	9	2351	0	1025	4544549248	8045382272	0,564864337444305	-1.77034	2,79632678676089	-1,70601481571794	-5,44266505571697	Q13257;Q13257-2	Q13257	Mitotic spindle assembly checkpoint protein MAD2A	MAD2L1
-0.854084253311157	-0.629405438899994	-1.08232343196869	-0.860529839992523	-0.0109265446662903	1.03001189231873	1.24815273284912	1.15910482406616	Discard	Keep	+	1%_21%	+_Discard	+_Keep	15	15	15	34222	0	13432	1868492352	3241271360	0,576468944549561	-1.7347	2,8528817287518	-1,71317146718502	-5,582587434195	Q9BYG3;C9J808;C9J6C5;H7BZL0	Q9BYG3;C9J808;C9J6C5	MKI67 FHA domain-interacting nucleolar phosphoprotein	NIFK
-1.29328870773315	-0.768560171127319	-0.627788126468658	-0.898575127124786	1.37791955471039	0.807195484638214	0.684269785881042	0.718827247619629	Discard	Keep	+	1%_21%	+_Discard	+_Keep	31	31	31	9931	0	14785	584201232	1228945280	0,475367963314056	-2.10363	3,77684547506092	-1,7941060513258	-8,28759952398491	A0A087WVM4;B7ZM99;Q6UB35;H0Y327;Q6UB35-2;Q5JYA8;Q5JYA3;Q4VXM0;Q4VXM1;Q4VXV2	A0A087WVM4;B7ZM99;Q6UB35	Monofunctional C1-tetrahydrofolate synthase, mitochondrial	MTHFD1L
-1.01551306247711	-0.609806180000305	-1.48108005523682	-0.345898270606995	0.832830667495728	0.794782757759094	1.29548907279968	0.529195010662079	Discard	Keep	+	1%_21%	+_Discard	+_Keep	15	15	15	2756	0	55974	3780550400	6398710016	0,590830087661743	-1.69253	2,96247345854892	-1,72614876925945	-5,86112338389625	Q9UKD2	Q9UKD2	mRNA turnover protein 4 homolog	MRTO4
-0.79956042766571	-0.647185802459717	-1.42515671253204	-0.538510322570801	1.5708988904953	0.730964660644531	0.600721836090088	0.507827877998352	Discard	Keep	+	1%_21%	+_Discard	+_Keep	6	1	1	3305	0	64383	205573764	492071072	0,417772501707077	-2.39365	2,79009862285735	-1,70520663261414	-5,42741042408893	Q9NR56-3;Q9NR56-4;Q9NR56-6;Q9NR56-2;Q9NR56-5;Q9NR56-7;H7C4T5;C9J4T8;Q9NUK0-4;Q9NUK0-3;C9JCX1;H7C4Y1	Q9NR56-3;Q9NR56-4;Q9NR56-6;Q9NR56-2;Q9NR56-5;Q9NR56-7;H7C4T5	Muscleblind-like protein 1	MBNL1
-1.22663187980652	-0.516298294067383	-0.727681636810303	-0.86141300201416	0.539634108543396	0.260343760251999	0.822941720485687	1.70910513401031	Discard	Keep	+	1%_21%	+_Discard	+_Keep	12	12	5	39143	0	52554	329126504	791795776	0,415670931339264	-2.40575	2,520427693731	-1,66601238399744	-4,79472633529268	Q02080-2;C9J4J4;B8ZZJ5	Q02080-2;C9J4J4;B8ZZJ5	Myocyte-specific enhancer factor 2B	MEF2B
-0.799322545528412	-0.244931861758232	-1.10619568824768	-0.790169179439545	-0.215604409575462	1.84827399253845	0.39408341050148	0.913866281509399	Discard	Keep	+	1%_21%	+_Discard	+_Keep	18	18	7	11405	0	13181	30276434	90348573	0,335106939077377	-2.98412	1,68276307060342	-1,47030963748693	-3,11333341142867	Q6WCQ1-3;Q6WCQ1-2;Q6WCQ1;J3KSW8;H7C3G6;J3QRL2;J3KSK7;J3QL44;A8MZF8;K7EL39	Q6WCQ1-3;Q6WCQ1-2;Q6WCQ1;J3KSW8	Myosin phosphatase Rho-interacting protein	MPRIP
-0.969543755054474	-1.91195464134216	-0.180013850331306	-0.00130228558555245	0.637345671653748	0.831189215183258	0.752091884613037	0.842187821865082	Discard	Keep	+	1%_21%	+_Discard	+_Keep	7	7	7	88272	16672	85272	22563903,5	47703255	0,473005533218384	-2.11414	1,88699152140395	-1,53140728140716	-3,49071595292078	Q9NXD2;Q9NXD2-2;H3BUZ0;H3BQP4;H3BUS9;Q9NXD2-3	Q9NXD2	Myotubularin-related protein 10	MTMR10
0.0397364348173141	-0.522388875484467	-1.12429618835449	-1.51122033596039	0.453129351139069	0.985318660736084	0.296357184648514	1.38336384296417	Discard	Keep	+	1%_21%	+_Discard	+_Keep	5	5	5	13901	0	14274	21757801,25	41796257	0,520568192005157	-1.92098	1,99268447849386	-1,55908450111747	-3,69321437383661	Q9HCH0;Q9HCH0-3;H7C1V4;Q9HCH0-2	Q9HCH0;Q9HCH0-3;H7C1V4;Q9HCH0-2	Nck-associated protein 5-like	NCKAP5L
-0.0974297374486923	-1.38411867618561	-1.64971971511841	0.0833287164568901	0.717567443847656	0.883362174034119	0.678482711315155	0.768527030944824	Discard	Keep	+	1%_21%	+_Discard	+_Keep	6	6	6	18856	0	48671	119342684	352110928	0,338934928178787	-2.95042	1,86013340104213	-1,52396969310939	-3,44007932184833	Q9UMX5	Q9UMX5	Neudesin	NENF
-1.17986536026001	-0.956147372722626	-0.784528911113739	-0.737467467784882	1.10607039928436	0.765326678752899	1.14751875400543	0.639093279838562	Discard	Keep	+	1%_21%	+_Discard	+_Keep	11	11	11	56598	0	17756	2369049568	5276598272	0,448972880840302	-2.22731	4,5611910570824	-1,82900455594063	-11,3890044728041	Q15758;M0QXM4;Q15758-3;Q15758-2;M0QX44;M0R144	Q15758;M0QXM4;Q15758-3;Q15758-2	Neutral amino acid transporter B(0);Amino acid transporter	SLC1A5
-1.22852730751038	-0.79895430803299	-0.462160378694534	-1.10483276844025	0.938552379608154	1.17503345012665	0.567174911499023	0.913714051246643	Discard	Keep	+	1%_21%	+_Discard	+_Keep	4	4	4	3348	0	40485	322895316	1182624064	0,273032963275909	-3.66256	3,83058430628354	-1,79723738878965	-8,47323547729373	Q8NI38;Q8NI38-2;Q8NI38-3;K7EKM2	Q8NI38;Q8NI38-2;Q8NI38-3	NF-kappa-B inhibitor delta	NFKBID
-1.76089835166931	-0.272420972585678	-0.852110087871552	-0.397120535373688	0.875870585441589	0.923521101474762	1.07422590255737	0.408932268619537	Discard	Keep	+	1%_21%	+_Discard	+_Keep	25	25	25	77672	0	13738	589077064	902021728	0,653062999248505	-1.53125	2,37635682606874	-1,64127495139837	-4,47745395714788	O15226;O15226-2;A0A087WXT2	O15226;O15226-2	NF-kappa-B-repressing factor	NKRF
-0.842398881912231	-1.37806665897369	-0.554276347160339	-0.776070356369019	0.600142538547516	1.16493153572083	0.601216971874237	1.18452119827271	Discard	Keep	+	1%_21%	+_Discard	+_Keep	3	3	3	63604	0	19647	68386117	117779680	0,580627501010895	-1.72227	3,4959723302421	-1,77540612220764	-7,37268174906676	Q12980;B7Z6Q0;F8WDA5;B1B1F5;A0A087WTD0	Q12980;B7Z6Q0	Nitrogen permease regulator 3-like protein	NPRL3
-0.933526933193207	-0.717142581939697	-0.337164551019669	-1.37097299098969	1.19594585895538	0.350630223751068	1.36745524406433	0.44477567076683	Discard	Keep	+	1%_21%	+_Discard	+_Keep	5	5	5	758	0	60104	12524102	31498635	0,397607743740082	-2.51504	2,6061029792981	-1,67940351366997	-4,99002522719964	Q8NDF8-5;Q8NDF8;H3BQM0;Q8NDF8-3;Q8NDF8-2;E9PC61;Q8NDF8-4	Q8NDF8-5;Q8NDF8;H3BQM0;Q8NDF8-3;Q8NDF8-2;E9PC61	Non-canonical poly(A) RNA polymerase PAPD5	PAPD5
-1.44618833065033	-1.70914244651794	0.127858743071556	0.369410783052444	0.492235749959946	0.587937712669373	0.759553253650665	0.818334519863129	Discard	Keep	+	1%_21%	+_Discard	+_Keep	5	5	5	30855	0	26735	234227864	717939616	0,326250106096268	-3.06513	1,31607606411578	-1,32903062179685	-2,47244384797908	Q8WV22;I3L1I3;H3BSL0;H3BR73;H3BR31;H3BN81;H3BV05	Q8WV22;I3L1I3;H3BSL0;H3BR73	Non-structural maintenance of chromosomes element 1 homolog	NSMCE1
-1.02290058135986	-1.18947923183441	0.0527343861758709	-1.22155582904816	1.05772316455841	0.911455392837524	0.485329419374466	0.926693260669708	Discard	Keep	+	1%_21%	+_Discard	+_Keep	7	7	7	56695	0	20672	26547923,5	98005670	0,270881503820419	-3.69165	2,68261331605766	-1,69060062337667	-5,16884159897351	P51688;I3NI22;I3L3T3;I3L2I6;I3L4B7;I3L2L4	P51688	N-sulphoglucosamine sulphohydrolase	SGSH
-1.35024809837341	-1.04975092411041	0.62224006652832	-1.18951010704041	0.946763098239899	0.57202559709549	0.716673970222473	0.731806457042694	Discard	Keep	+	1%_21%	+_Discard	+_Keep	12	1	1	50031	16103	70308	8417158,5	30141899,5	0,27925106883049	-3.58101	1,7243430612413	-1,48363454639912	-3,18879547656096	P23497-7	P23497-7	Nuclear autoantigen Sp-100	SP100
-0.736712455749512	-0.316423714160919	-0.575121164321899	-1.64069724082947	0.306788057088852	1.17136693000793	1.25925278663635	0.531546831130981	Discard	Keep	+	1%_21%	+_Discard	+_Keep	15	3	3	12772	0	67744	23197046,75	54114283	0,428667694330215	-2.33281	2,33957258833482	-1,63447729498148	-4,39857964777754	Q96HA1;Q96HA1-2;Q96HA1-3	Q96HA1;Q96HA1-2;Q96HA1-3	Nuclear envelope pore membrane protein POM 121	POM121
-0.724017143249512	-1.12022018432617	-0.795037984848022	-0.0410166941583157	-0.700340270996094	1.24622929096222	0.702690720558167	1.43171226978302	Discard	Keep	+	1%_21%	+_Discard	+_Keep	18	18	18	139	0	45999	28925321	63700099	0,454085946083069	-2.20223	1,34093484569943	-1,34014600422233	-2,51473273174283	Q6P4R8;Q6P4R8-3;Q6P4R8-2;E9PQ59;E9PJG2;E9PQB0;E9PJU3	Q6P4R8;Q6P4R8-3;Q6P4R8-2;E9PQ59	Nuclear factor related to kappa-B-binding protein	NFRKB
-0.946951270103455	-0.523394703865051	-1.61613595485687	-0.401322603225708	0.913986921310425	0.816660821437836	0.806887805461884	0.950268924236298	Discard	Keep	+	1%_21%	+_Discard	+_Keep	19	19	19	7612	0	32331	467865072	818057664	0,57192188501358	-1.74849	3,12987061373556	-1,74390225112438	-6,30643230575999	Q7Z417;Q7Z417-2	Q7Z417	Nuclear fragile X mental retardation-interacting protein 2	NUFIP2
-0.704917252063751	-0.0826456397771835	-1.59066116809845	-0.572009861469269	0.403569668531418	0.00791537575423717	1.62525987625122	0.913489043712616	Discard	Keep	+	1%_21%	+_Discard	+_Keep	3	3	3	16019	3003	47424	447930520	728062960	0,615235984325409	-1.62539	1,69759196211963	-1,47511697141454	-3,14017024167809	Q13901;J3KPZ4	Q13901;J3KPZ4	Nuclear nucleic acid-binding protein C1D	C1D
-0.512117624282837	-0.862583160400391	-0.790021359920502	-1.26457810401917	0.154366329312325	1.41445541381836	0.843086659908295	1.01739192008972	Discard	Keep	+	1%_21%	+_Discard	+_Keep	20	20	20	65536	0	32331	727877504	1243237872	0,585469186306	-1.70803	2,86489364404283	-1,7146501429379	-5,61263535592559	Q9HCD5;Q5JY17	Q9HCD5	Nuclear receptor coactivator 5	NCOA5
-0.7023104429245	-1.33980774879456	-0.92492401599884	-0.643399953842163	0.904714643955231	1.08434367179871	1.06902766227722	0.552356123924255	Discard	Keep	+	1%_21%	+_Discard	+_Keep	19	19	15	35924	0	32331	3303924992	5886803712	0,561242580413818	-1.78176	3,97879253287746	-1,80522106587887	-9,00405625174307	P67809;A0A087X1S2;H0Y449;C9J5V9;Q9Y2T7	P67809;A0A087X1S2;H0Y449;C9J5V9	Nuclease-sensitive element-binding protein 1	YBX1
0.147325202822685	-1.61519587039948	0.153486654162407	-1.52401173114777	0.770469129085541	0.636361956596375	0.715982258319855	0.715582311153412	Discard	Keep	+	1%_21%	+_Discard	+_Keep	37	37	37	73964	0	32331	1364289616	5092970496	0,267877012491226	-3.73306	1,53594537688834	-1,41919784992933	-2,85185249319236	Q9BZE4;Q9BZE4-2;Q9BZE4-3;Q5T3R7	Q9BZE4;Q9BZE4-2;Q9BZE4-3	Nucleolar GTP-binding protein 1	GTPBP4
-1.06460344791412	-1.0847841501236	-0.92358523607254	-0.614642977714539	0.883960604667664	0.783599555492401	1.1180557012558	0.901999950408936	Discard	Keep	+	1%_21%	+_Discard	+_Keep	19	19	19	83654	0	17889	229331204	896636464	0,255768299102783	-3.90979	5,12778502262957	-1,8438079059124	-14,2555582953056	Q13823;H0YG10	Q13823	Nucleolar GTP-binding protein 2	GNL2
-1.39865660667419	-0.641655504703522	-0.333033889532089	-0.953894376754761	0.0704363957047462	1.05049967765808	1.28863990306854	0.917664408683777	Discard	Keep	+	1%_21%	+_Discard	+_Keep	19	19	19	96256	0	10646	97357094	233069328	0,417717337608337	-2.39396	2,50573181127233	-1,66362019069493	-4,76173478935487	Q5C9Z4	Q5C9Z4	Nucleolar MIF4G domain-containing protein 1	NOM1
-0.240356773138046	-1.38552618026733	-1.21362614631653	-0.503245294094086	0.33236026763916	1.24218583106995	0.684564530849457	1.08364379405975	Discard	Keep	+	1%_21%	+_Discard	+_Keep	20	20	20	80301	0	81943	254548172	394800368	0,644751608371735	-1.55098	2,55403884585985	-1,67137720435858	-4,87073583234276	Q9BSC4;Q9BSC4-4;Q9BSC4-2;H7C1Z3;Q9BSC4-3	Q9BSC4;Q9BSC4-4;Q9BSC4-2	Nucleolar protein 10	NOL10
-0.81773042678833	-1.81455290317535	-0.391956150531769	-0.246929153800011	1.07849979400635	0.7110795378685	0.570850789546967	0.910738468170166	Discard	Keep	+	1%_21%	+_Discard	+_Keep	5	5	5	24663	0	22809	229830964	472545016	0,486368387937546	-2.05605	2,34548770546344	-1,63558430597186	-4,41120649856997	Q9UGY1;V9GYY5	Q9UGY1;V9GYY5	Nucleolar protein 12	NOL12
-1.47334897518158	-1.66400921344757	0.366975963115692	0.10551879554987	0.359107196331024	0.786466479301453	0.679325342178345	0.839964389801025	Discard	Keep	+	1%_21%	+_Discard	+_Keep	7	7	1	3312	0	20226	163881104,5	515765760	0,317743271589279	-3.14719	1,32362257093589	-1,33243170939386	-2,4852675574665	Q8NFH5-2;C9IYQ7;C9JIY9;C9JWU7	Q8NFH5-2	Nucleoporin NUP53	NUP35
0.0619921498000622	0.0520738996565342	-1.43625485897064	-1.62840592861176	0.483471184968948	0.718382775783539	0.869572877883911	0.879167914390564	Discard	Keep	+	1%_21%	+_Discard	+_Keep	8	1	1	27626	0	37598	44443630,5	211122864	0,210510745644569	-4.75035	1,69815212937298	-1,47529737278819	-3,14118564174798	Q9NX40;D6RG39;D6RIT9;Q9NX40-3;Q9NX40-2;Q9NX40-4;D6R918;D6RBC5;D6RDI5;D6RA54;D6RC55	Q9NX40;D6RG39;D6RIT9;Q9NX40-3;Q9NX40-2;Q9NX40-4	OCIA domain-containing protein 1	OCIAD1
-0.690916955471039	-1.3416074514389	-0.217221289873123	-0.960548937320709	0.0814170315861702	1.06149840354919	0.542544066905975	1.52483510971069	Discard	Keep	+	1%_21%	+_Discard	+_Keep	8	8	8	12404	0	414	63362134	133554030	0,474430710077286	-2.10779	2,19252087211605	-1,60514731146395	-4,09139665201785	Q01804;Q01804-5;Q01804-3;D6RI06	Q01804;Q01804-5;Q01804-3	OTU domain-containing protein 4	OTUD4
-2.10989689826965	-0.320291608572006	-0.60786759853363	0.21100714802742	0.615499138832092	0.859730243682861	0.680282652378082	0.671536922454834	Discard	Keep	+	1%_21%	+_Discard	+_Keep	2	2	2	24418	0	24411	89622163,5	288444640	0,310708343982697	-3.21845	1,52075930052534	-1,41352447867393	-2,82521440048025	Q8WZ82	Q8WZ82	Ovarian cancer-associated gene 2 protein	OVCA2
-0.737386584281921	-1.18506252765656	-1.37498724460602	-0.157619178295135	0.716600894927979	0.638740062713623	0.977235317230225	1.12247920036316	Discard	Keep	+	1%_21%	+_Discard	+_Keep	11	11	11	43963	0	62656	418737944	688104752	0,608538091182709	-1.64328	2,97470434622611	-1,72752775251865	-5,89283173835526	Q9NWT1	Q9NWT1	p21-activated protein kinase-interacting protein 1	PAK1IP1
-0.963848471641541	-1.14820611476898	-1.3059002161026	0.00554930698126554	0.920619189739227	0.889854252338409	1.0507048368454	0.551227331161499	Discard	Keep	+	1%_21%	+_Discard	+_Keep	6	6	3	34193	0	92499	117907520	257038748	0,458714962005615	-2.18	2,79777966885782	-1,7062027764041	-5,44622796578102	P50897;E9PMG2;E9PK48;E9PIA8;P50897-2;Q5T0S4;E9PSE5	P50897;E9PMG2;E9PK48;E9PIA8;P50897-2	Palmitoyl-protein thioesterase 1	PPT1
-0.693632543087006	-0.466957658529282	-1.56088769435883	-0.664265692234039	0.275496184825897	0.948095858097076	1.31663024425507	0.84552127122879	Discard	Keep	+	1%_21%	+_Discard	+_Keep	6	6	6	70864	0	80556	142399104	311352492	0,457356572151184	-2.18648	2,69872704773916	-1,692871786654	-5,20704868440947	P50542;B4E0T2;P50542-2;P50542-4;P50542-3;H0YGT8;F5H5C0	P50542;B4E0T2;P50542-2;P50542-4;P50542-3	Peroxisomal targeting signal 1 receptor	PEX5
-0.694849669933319	-0.690499722957611	-0.723071992397308	-0.615168333053589	-0.887917160987854	1.24467051029205	1.20030081272125	1.16653549671173	Discard	Keep	+	1%_21%	+_Discard	+_Keep	7	7	7	10406	0	69336	71247506	466542095	0,152713999152184	-6.54819	1,3910284485945	-1,36179484426975	-2,60037767179671	Q13608;Q13608-2;Q13608-3	Q13608;Q13608-2;Q13608-3	Peroxisome assembly factor 2	PEX6
-1.95869159698486	0.220725193619728	-0.552930116653442	-0.6745285987854	0.975762605667114	0.608631491661072	0.493134647607803	0.887896418571472	Discard	Keep	+	1%_21%	+_Discard	+_Keep	9	9	9	11226	0	11533	54614742	93795862	0,582272410392761	-1.71741	1,72141738817692	-1,48271257057786	-3,18346404561976	A0A0A0MQS0;F8W9L8;A8MW92;A8MW92-4;A8MW92-2;E9PM57;A8MUE8;A8MXR8;A0A0D9SG14;E5RK91;H0YDF7	A0A0A0MQS0;F8W9L8;A8MW92;A8MW92-4;A8MW92-2;E9PM57;A8MUE8;A8MXR8	PHD finger protein 20-like protein 1	PHF20L1
-0.871064007282257	-1.09314334392548	-0.522325158119202	-0.862295150756836	-0.0552248060703278	1.15517377853394	0.83834046125412	1.41053807735443	Discard	Keep	+	1%_21%	+_Discard	+_Keep	32	32	30	20669	0	32331	169048316	362195304	0,466732501983643	-2.14255	2,57347835357878	-1,67441379278898	-4,91505326215179	Q8WWQ0	Q8WWQ0	PH-interacting protein	PHIP
-1.44258987903595	-0.0653238371014595	-0.00291931885294616	-1.56920897960663	0.786553502082825	0.850146651268005	0.907692968845367	0.535648882389069	Discard	Keep	+	1%_21%	+_Discard	+_Keep	9	9	9	27614	0	69926	210184338	1127784608	0,186369225382805	-5.36569	1,91888293773602	-1,54002100479556	-3,55126573933073	Q9H2J4;C9JST4;H7BZP2	Q9H2J4	Phosducin-like protein 3	PDCL3
-0.944519519805908	-1.86878418922424	0.237432867288589	-0.436602264642715	0.481809824705124	0.872211933135986	0.8149493932724	0.84350198507309	Discard	Keep	+	1%_21%	+_Discard	+_Keep	3	3	2	98663	32154	2244	17324803,25	39851518	0,434733837842941	-2.30026	1,79847673531865	-1,50623656064272	-3,32502910119899	Q14693;Q14693-2;Q14693-4;Q14693-3;Q14693-5;Q14693-7;H7C3T1	Q14693;Q14693-2;Q14693-4;Q14693-3;Q14693-5;Q14693-7	Phosphatidate phosphatase LPIN1	LPIN1
-0.831694483757019	-0.882165670394897	-0.857213914394379	-1.14190769195557	0.881295144557953	1.10487830638885	0.901669859886169	0.82513839006424	Discard	Keep	+	1%_21%	+_Discard	+_Keep	7	7	7	22174	0	13926	1090912160	2714767936	0,40184360742569	-2.48853	5,95121209127563	-1,85649086534977	-19,671094615265	P36969;A0A087X2I2;A0A087WT12;P36969-2;K7ERP4;K7EJ20;K7EKX7;R4GNE4;K7ENB4;A0A087X247;A0A0A0MTT1	P36969;A0A087X2I2;A0A087WT12;P36969-2;K7ERP4;K7EJ20;K7EKX7;R4GNE4;K7ENB4	Phospholipid hydroperoxide glutathione peroxidase, mitochondrial;Glutathione peroxidase	GPX4
-1.10300171375275	-0.852575361728668	-0.460604518651962	-1.21591031551361	0.856370508670807	0.756449460983276	1.11354112625122	0.905730783939362	Discard	Keep	+	1%_21%	+_Discard	+_Keep	9	9	8	28082	0	1294	949145824	1573263008	0,603297650814056	-1.65756	4,2118169681976	-1,81604594737291	-9,89808606676528	O15305;H3BV55;H3BRM0;H3BPH4;O15305-2;H3BR08;H3BM92;H3BV34;H3BT06;H3BNY9	O15305;H3BV55;H3BRM0;H3BPH4	Phosphomannomutase 2;Phosphomannomutase	PMM2
-1.74304461479187	0.0917615666985512	-1.3662246465683	0.152589321136475	0.640762627124786	0.771913111209869	0.690125823020935	0.762116730213165	Discard	Keep	+	1%_21%	+_Discard	+_Keep	8	8	8	25007	0	3947	2418070528	9068738432	0,26663801074028	-3.7504	1,57225828226058	-1,43245916627347	-2,91584527521605	P78330;C9JBI3;C9JEJ7;F8WD74	P78330;C9JBI3	Phosphoserine phosphatase	PSPH
-0.188101828098297	-1.33377695083618	-1.69253623485565	0.254533559083939	0.939088106155396	0.747117102146149	0.686809062957764	0.586867272853851	Discard	Keep	+	1%_21%	+_Discard	+_Keep	29	1	0	44256	44059	41008	188778024	799971856	0,235980823636055	-4.23763	1,71266583368962	-1,47994074970484	-3,16753599224028	Q8NC51-2	Q8NC51-2	Plasminogen activator inhibitor 1 RNA-binding protein	SERBP1
-0.230781421065331	-1.17031300067902	-0.542132198810577	-1.35227513313293	0.697080314159393	1.44863784313202	0.898216724395752	0.2515669465065	Discard	Keep	+	1%_21%	+_Discard	+_Keep	7	7	7	46236	0	11538	71547249	146630212	0,487943440675735	-2.04942	2,41246388494886	-1,64775089547038	-4,55570250968039	Q53GL0;Q53GL0-2;Q5T4P9	Q53GL0;Q53GL0-2	Pleckstrin homology domain-containing family O member 1	PLEKHO1
-0.72949606180191	-0.764850735664368	-0.182870954275131	-1.60983395576477	1.28504383563995	0.612716734409332	1.0593421459198	0.329949140548706	Discard	Keep	+	1%_21%	+_Discard	+_Keep	10	10	10	79063	0	11076	75677110	167665030	0,45135897397995	-2.21553	2,38878621432576	-1,64352589100599	-4,50429674595297	Q9H0J9;G5E9U9;H7C4L8	Q9H0J9;G5E9U9	Poly [ADP-ribose] polymerase 12	PARP12
-0.800958096981049	-0.901009976863861	-0.944096028804779	-0.358607083559036	1.22334325313568	1.1050341129303	1.22707188129425	-0.550777971744537	Discard	Keep	+	1%_21%	+_Discard	+_Keep	7	7	7	19259	0	95991	9809857,75	26165843,75	0,374910831451416	-2.6673	1,78533937792754	-1,5023356154561	-3,30072365430022	Q9UKK3	Q9UKK3	Poly [ADP-ribose] polymerase 4	PARP4
-0.960575103759766	-1.0498663187027	-0.775604724884033	-0.810999870300293	0.394946336746216	1.15705168247223	0.767640948295593	1.27740705013275	Discard	Keep	+	1%_21%	+_Discard	+_Keep	12	12	1	66171	0	72603	457484248	742837504	0,615860462188721	-1.62374	3,85331961133515	-1,79852300882339	-8,55284839370278	Q9NVV4;Q5T851;Q5T852	Q9NVV4	Poly(A) RNA polymerase, mitochondrial	MTPAP
0.207311019301414	-0.821585297584534	-0.347667276859283	-1.93995785713196	0.353037178516388	0.961121022701263	0.583085477352142	1.00465571880341	Discard	Keep	+	1%_21%	+_Discard	+_Keep	8	8	8	38946	0	99867	775805472	1211309840	0,640468239784241	-1.56136	1,62490886939186	-1,45094970241189	-3,00940464597431	Q9NX46	Q9NX46	Poly(ADP-ribose) glycohydrolase ARH3	ADPRHL2
-1.32769978046417	-0.804369628429413	-1.02082896232605	-0.46415987610817	1.09918653964996	0.913929045200348	0.839874863624573	0.764067709445953	Discard	Keep	+	1%_21%	+_Discard	+_Keep	8	8	8	22658	0	13976	1211784624	2192276768	0,552751660346985	-1.80913	4,04561688010485	-1,80852910131216	-9,25278625196517	P61758;B4DWR3	P61758;B4DWR3	Prefoldin subunit 3	VBP1
-0.619948029518127	-0.949138641357422	-1.50540804862976	-0.383590787649155	0.976049900054932	0.405304580926895	0.919930458068848	1.15680062770844	Discard	Keep	+	1%_21%	+_Discard	+_Keep	4	4	4	15314	0	22658	598432080	986105984	0,606863856315613	-1.64782	2,98828120803764	-1,72904276847839	-5,92817906240257	Q9NQP4;E9PQY2	Q9NQP4;E9PQY2	Prefoldin subunit 4	PFDN4
-1.64899551868439	-0.897766411304474	-0.596294641494751	0.296371847391129	1.39694929122925	0.630986511707306	0.825691282749176	-0.00694243283942342	Discard	Keep	+	1%_21%	+_Discard	+_Keep	8	8	8	49647	0	14876	46968588	83105682	0,565167009830475	-1.76939	1,54716956795404	-1,4233423442347	-2,8715873621263	Q9NXE8;Q9NXE8-2;A0A087WY60	Q9NXE8	Pre-mRNA-splicing factor CWC25 homolog	CWC25
-1.71415913105011	0.303192794322968	-0.170353531837463	-1.32610976696014	0.515665709972382	0.758714139461517	0.75668728351593	0.876362502574921	Discard	Keep	+	1%_21%	+_Discard	+_Keep	11	11	11	32992	0	48213	213411466	887461888	0,240473955869675	-4.15845	1,63299537398872	-1,45371481776237	-3,0238588440489	Q9ULR0;Q9ULR0-2;Q9ULR0-1;A8MVI5;D6RC18;H0YA89	Q9ULR0;Q9ULR0-2;Q9ULR0-1;A8MVI5	Pre-mRNA-splicing factor ISY1 homolog	ISY1
-1.1957494020462	-1.03033828735352	0.0531534962356091	-0.952526807785034	-0.148650795221329	1.1253490447998	1.04835093021393	1.10041189193726	Discard	Keep	+	1%_21%	+_Discard	+_Keep	9	9	9	3188	0	11267	1219690160	3832342048	0,318262338638306	-3.14206	2,00733872053724	-1,5627305181697	-3,72171325079212	O43709;O43709-3;F8WD67;O43709-2;F8VZ18;F8WD87;E9PCQ7;F2Z3D9;H7C0G4;B3KR83;H7C170	O43709;O43709-3	Probable 18S rRNA (guanine-N(7))-methyltransferase	WBSCR22
0.121360599994659	-0.13692618906498	-1.46272969245911	-1.57188773155212	0.625036835670471	0.778320968151093	0.780739545822144	0.866085767745972	Discard	Keep	+	1%_21%	+_Discard	+_Keep	15	15	15	65505	0	25748	64290418,5	269473332	0,238578036427498	-4.1915	1,86414554621019	-1,52509153261781	-3,44762315263603	Q5T160;H0Y450	Q5T160	Probable arginine--tRNA ligase, mitochondrial	RARS2
-1.39416778087616	-0.795654892921448	-0.955527305603027	-0.242283716797829	0.646133780479431	1.1179758310318	1.29457747936249	0.328946709632874	Discard	Keep	+	1%_21%	+_Discard	+_Keep	27	27	27	10089	0	1601	254067872	439284576	0,578367412090302	-1.729	2,70549482237566	-1,69381687417626	-5,22315337587749	Q13206;E9PIF2	Q13206;E9PIF2	Probable ATP-dependent RNA helicase DDX10	DDX10
-0.833855628967285	-1.17802965641022	-0.938748896121979	-0.510330319404602	0.154635921120644	1.27875912189484	1.18783640861511	0.839733183383942	Discard	Keep	+	1%_21%	+_Discard	+_Keep	19	19	19	92239	0	12094	429793512	765407808	0,561522245407104	-1.78087	3,00131928777419	-1,73048228397965	-5,96227268404788	Q9UHI6;E9PJ60;Q9UHI6-2	Q9UHI6	Probable ATP-dependent RNA helicase DDX20	DDX20
-0.219930231571198	-2.25251650810242	-0.0495771989226341	-0.164136320352554	0.609171390533447	0.76688289642334	0.779578149318695	0.530527949333191	Discard	Keep	+	1%_21%	+_Discard	+_Keep	18	18	18	61589	0	12012	448515921	1530739584	0,293006032705307	-3.4129	1,34759216325024	-1,34308016113937	-2,52608105984153	Q9NY93;Q9NY93-2;H7C3E9;G3V0G3;H7BZN7;F8WDT8;F8WEI3	Q9NY93;Q9NY93-2;H7C3E9;G3V0G3	Probable ATP-dependent RNA helicase DDX56	DDX56
0.535747706890106	-1.4545636177063	-0.645613968372345	-1.23453605175018	0.387087762355804	1.30428278446198	0.863594532012939	0.244000881910324	Discard	Keep	+	1%_21%	+_Discard	+_Keep	4	4	4	3807	29828	45305	125274284	195993052	0,639177203178406	-1.56451	1,48403153296338	-1,39948297291994	-2,76107933066154	Q96EY9;D6W601	Q96EY9;D6W601	Probable inactive tRNA-specific adenosine deaminase-like protein 3	ADAT3
-1.01043665409088	-0.693823516368866	-1.40320205688477	-0.496128052473068	0.893324673175812	0.80891627073288	0.844447374343872	1.0569019317627	Discard	Keep	+	1%_21%	+_Discard	+_Keep	5	5	5	19621	0	1468	694579128	1921928224	0,36139702796936	-2.76704	3,91307873440329	-1,80179513245821	-8,76521764221344	Q9UHA3;H3BMQ2	Q9UHA3	Probable ribosome biogenesis protein RLP24	RSL24D1
-0.811774730682373	-0.187485963106155	-1.48969340324402	-0.658328592777252	0.00437035644426942	0.72828608751297	1.52953863143921	0.885087609291077	Discard	Keep	+	1%_21%	+_Discard	+_Keep	2	2	2	35027	29538	22821	32057620	69850443	0,458946585655212	-2.1789	2,0523018042145	-1,57364134362433	-3,80982454053704	Q96CW6;A0A087WY19;I3L4S1;A0A087X0P9	Q96CW6;A0A087WY19;I3L4S1;A0A087X0P9	Probable RNA polymerase II nuclear localization protein SLC7A6OS	SLC7A6OS
-0.0928928852081299	-1.30687475204468	-0.170723453164101	-1.19735777378082	-0.486046403646469	1.1475168466568	0.89636754989624	1.21001088619232	Discard	Keep	+	1%_21%	+_Discard	+_Keep	12	12	12	10733	0	88697	86912740	146859096	0,591810345649719	-1.68973	1,44469268810214	-1,38392443582416	-2,69281917319056	Q9Y4C8;H0YIL2	Q9Y4C8	Probable RNA-binding protein 19	RBM19
-0.84407114982605	-0.570115268230438	-1.00053668022156	-0.758414566516876	-0.347644984722137	1.33229923248291	1.31291735172272	0.875565946102142	Discard	Keep	+	1%_21%	+_Discard	+_Keep	12	12	12	34852	0	96925	855944112	2515055744	0,340328097343445	-2.93834	2,10786674348919	-1,58656880259514	-3,92014478929476	Q99848;H7C2Q8	Q99848;H7C2Q8	Probable rRNA-processing protein EBP2	EBNA1BP2
-0.752760648727417	-1.51667416095734	-0.425667196512222	-0.815551817417145	0.528947174549103	1.07525682449341	1.08263838291168	0.82381147146225	Discard	Keep	+	1%_21%	+_Discard	+_Keep	13	13	13	37252	0	46222	189409284	535823040	0,353492230176926	-2.82892	3,25072572980178	-1,75532691925764	-6,64379301061174	Q8WWH5	Q8WWH5	Probable tRNA pseudouridine synthase 1	TRUB1
-1.60817730426788	-1.45694208145142	-0.0842016041278839	0.141002908349037	0.783529818058014	0.738251984119415	0.755185127258301	0.731351137161255	Discard	Keep	+	1%_21%	+_Discard	+_Keep	10	10	10	36694	0	67036	73393226,5	398367672	0,184234887361526	-5.42785	1,79146165514019	-1,50415903702378	-3,31204155657922	O95900;O95900-2	O95900;O95900-2	Probable tRNA pseudouridine synthase 2	TRUB2
-1.13559794425964	-1.15751755237579	-0.708451926708221	-0.667060494422913	0.732877135276794	0.90845775604248	1.06992197036743	0.95737099647522	Discard	Keep	+	1%_21%	+_Discard	+_Keep	6	6	6	39416	0	22585	651893504	1702013504	0,383013129234314	-2.61088	4,73713607078349	-1,83431394398212	-12,215538753746	Q9BRP1	Q9BRP1	Programmed cell death protein 2-like	PDCD2L
-0.72191333770752	-1.06043994426727	-1.58956956863403	0.185682833194733	0.887279391288757	1.06151187419891	0.380620568990707	0.856828212738037	Discard	Keep	+	1%_21%	+_Discard	+_Keep	4	4	4	27383	0	51462	106774506	235658632	0,453089743852615	-2.20707	2,13704144560579	-1,59312001615763	-3,97872261295423	Q96B36;Q96B36-3;H9KV91;Q96B36-2;M0R2V8	Q96B36;Q96B36-3;H9KV91;Q96B36-2	Proline-rich AKT1 substrate 1	AKT1S1
-0.24570806324482	-0.987972438335419	-1.49655425548553	-0.267868041992188	0.741889953613281	1.13568985462189	-0.209196746349335	1.32971978187561	Discard	Keep	+	1%_21%	+_Discard	+_Keep	22	22	22	21104	0	11717	54375837	102087417	0,532639920711517	-1.87744	1,77439290551274	-1,49905141070485	-3,28052611656683	Q9ULL5-3;Q9ULL5;Q9ULL5-2	Q9ULL5-3;Q9ULL5;Q9ULL5-2	Proline-rich protein 12	PRR12
-0.670502960681915	-0.971347093582153	-0.586343884468079	-1.32475221157074	0.411038935184479	1.03574967384338	0.897413969039917	1.20874357223511	Discard	Keep	+	1%_21%	+_Discard	+_Keep	4	3	3	46868	0	36339	79119539	190445668	0,415444135665894	-2.40706	3,51043276250778	-1,77647307515144	-7,41761785180243	Q86YD1;M0QY25;Q86YD1-2;M0QYH6;M0QZB9;M0QYQ4;M0QYH7;A0A0C4DGR2;Q86YD1-3;M0QX53	Q86YD1;M0QY25;Q86YD1-2;M0QYH6;M0QZB9;M0QYQ4;M0QYH7;A0A0C4DGR2;Q86YD1-3	Prostate tumor-overexpressed gene 1 protein	PTOV1
-1.55263185501099	-0.472312182188034	-0.319769769906998	-0.750205278396606	-0.200214877724648	1.001016497612	1.26450526714325	1.02961230278015	Discard	Keep	+	1%_21%	+_Discard	+_Keep	9	9	9	29396	0	52694	1411020320	2182835968	0,646416068077087	-1.54699	1,94713498658997	-1,54745956882834	-3,60529906612034	Q969U7;Q969U7-2;K7ENR6;V9GZ55;K7ER45	Q969U7;Q969U7-2;K7ENR6	Proteasome assembly chaperone 2	PSMG2
-0.625443518161774	-0.692635416984558	-0.738569319248199	-0.828753530979156	-0.729304015636444	1.28413188457489	1.15846121311188	1.17211270332336	Discard	Keep	+	1%_21%	+_Discard	+_Keep	11	11	11	29483	0	27637	1135292544	6964050976	0,163021862506866	-6.13415	1,60111991326861	-1,44270089268684	-2,96701524550478	P25789;H0YN18;H0YL69;H0YMA1;H0YMZ1;P25789-2;H0YKT8;H0YMI6;H0YKS0;H0YLC2;H0YLS6;H0YMV3	P25789;H0YN18;H0YL69;H0YMA1;H0YMZ1;P25789-2;H0YKT8;H0YMI6	Proteasome subunit alpha type-4;Proteasome subunit alpha type;Proteasome subunit beta type	PSMA4
-1.22969317436218	-1.34247601032257	-0.486596375703812	-0.504119515419006	0.815148055553436	0.994548559188843	0.922812640666962	0.830375790596008	Discard	Keep	+	1%_21%	+_Discard	+_Keep	7	7	7	43472	0	32331	327725704	702394144	0,466583788394928	-2.14324	3,58004528243483	-1,78144253045321	-7,63714071731656	Q9Y312;A2A2Q9	Q9Y312;A2A2Q9	Protein AAR2 homolog	AAR2
-0.91918534040451	-0.8725466132164	-1.02262628078461	-0.657505512237549	1.36874032020569	0.923138082027435	0.0930691882967949	1.08691620826721	Discard	Keep	+	1%_21%	+_Discard	+_Keep	11	11	11	59875	0	39589	89969358	275109788	0,327030748128891	-3.05782	3,05194429291024	-1,73593188636005	-6,09605414035083	O60678;A0A0A0MSN7;O60678-2	O60678;A0A0A0MSN7;O60678-2	Protein arginine N-methyltransferase 3	PRMT3
-1.46204102039337	-0.944305837154388	-0.840410530567169	-0.156884714961052	0.516090035438538	0.669504880905151	0.928236722946167	1.28981041908264	Discard	Keep	+	1%_21%	+_Discard	+_Keep	9	9	9	76277	0	67	132116058	300339212	0,439889490604401	-2.2733	2,76434225394785	-1,70182104036212	-5,36464610063549	O15234;J3KSY7;J3QSC4	O15234	Protein CASC3	CASC3
-1.77928268909454	-0.236046299338341	-0.229700446128845	-0.658116519451141	0.690828323364258	1.245885014534	1.11412298679352	-0.147690400481224	Discard	Keep	+	1%_21%	+_Discard	+_Keep	4	4	4	24074	0	27497	223960822	494953704	0,452488422393799	-2.21	1,62672656215824	-1,45157296955585	-3,01265167052757	O75629	O75629	Protein CREG1	CREG1
-0.966865181922913	-1.55840289592743	-0.765548229217529	-0.130718246102333	0.784870564937592	0.680275976657867	1.12115621566772	0.835231781005859	Discard	Keep	+	1%_21%	+_Discard	+_Keep	5	5	5	39499	16359	77049	88248052	325315272	0,27126932144165	-3.68637	2,83359478666904	-1,71076727285981	-5,53458376189596	Q9BPY3;E9PMJ2;J3KP39;G3V179;E9PIM5;E9PMW3	Q9BPY3;E9PMJ2;J3KP39;G3V179	Protein FAM118B	FAM118B
0.00138289085589349	-1.39725971221924	-0.855327010154724	-0.574379801750183	-0.42326956987381	1.34520828723907	0.647279500961304	1.25636541843414	Discard	Keep	+	1%_21%	+_Discard	+_Keep	5	5	5	13999	1526	51587	9274668,5	29884200,5	0,310353577136993	-3.22213	1,51881296579726	-1,41279181750724	-2,82180545797836	P78312;P78312-2;P78312-5;P78312-4;P78312-6;D6RFZ4;E7EUR8;P78312-3	P78312;P78312-2;P78312-5;P78312-4;P78312-6;D6RFZ4;E7EUR8;P78312-3	Protein FAM193A	FAM193A
-0.950374960899353	-0.351696282625198	-1.04772114753723	-0.346522063016891	0.841981649398804	-0.764182329177856	1.43979835510254	1.17871677875519	Discard	Keep	+	1%_21%	+_Discard	+_Keep	12	12	12	26884	0	11284	8909171,5	21308671,25	0,418100774288177	-2.39177	1,35920747174444	-1,34815722703934	-2,54590514049745	Q5VWN6;Q5VWN6-2;J3KPH3	Q5VWN6;Q5VWN6-2	Protein FAM208B	FAM208B
-0.385896235704422	-0.264608681201935	-1.731161236763	-0.370277523994446	0.0749215930700302	0.0318460687994957	1.58898651599884	1.05618941783905	Discard	Keep	+	1%_21%	+_Discard	+_Keep	13	9	9	554	0	32331	260225876	463799696	0,561073839664459	-1.7823	1,42510789550049	-1,3759718183428	-2,65899523101066	Q8NCA5;Q8NCA5-2;E9PH82;C9J3G8	Q8NCA5;Q8NCA5-2;E9PH82	Protein FAM98A	FAM98A
-0.558174133300781	0.0484665334224701	-1.72061896324158	-0.537118852138519	0.564366459846497	1.39283180236816	-0.246921807527542	1.05716896057129	Discard	Keep	+	1%_21%	+_Discard	+_Keep	15	15	11	45547	0	19332	612479088	987602896	0,620167374610901	-1.61247	1,44419157248605	-1,3837227076292	-2,69195242970246	Q52LJ0-2;Q52LJ0;H0YNA1	Q52LJ0-2;Q52LJ0	Protein FAM98B	FAM98B
-1.11943960189819	-1.07333028316498	-0.538661658763885	-0.465040266513824	-0.0524809695780277	1.59728360176086	0.53400981426239	1.11765944957733	Discard	Keep	+	1%_21%	+_Discard	+_Keep	49	49	47	33959	0	25775	106617268	163174794	0,653392970561981	-1.53047	2,16032800312189	-1,59823592659086	-4,0258088605272	O94915;F2Z2S2;H0Y9X0;D6RJI4;O94915-2;D6R9B9	O94915;F2Z2S2	Protein furry homolog-like	FRYL
0.0780465379357338	-0.295356899499893	-1.29199743270874	-1.22934138774872	-0.299487382173538	0.403281271457672	1.28153908252716	1.35331618785858	Discard	Keep	+	1%_21%	+_Discard	+_Keep	1	1	1	17883	2955	22872	84688610	128777492	0,65763521194458	-1.5206	1,40899834185438	-1,36932458542287	-2,63124927886769	Q8N292	Q8N292	Protein GAPT	GAPT
-1.44110536575317	0.0776349455118179	-1.15340793132782	-0.222488388419151	1.24271404743195	0.0796486809849739	1.40946745872498	0.00753646669909358	Discard	Keep	+	1%_21%	+_Discard	+_Keep	4	4	4	95532	437	39014	9338124,25	14249612,5	0,655324816703796	-1.52596	1,40986184512395	-1,36968334845733	-2,63273480947463	Q6IE81;Q6IE81-2;Q6IE81-3	Q6IE81;Q6IE81-2;Q6IE81-3	Protein Jade-1	JADE1
-1.7794588804245	-0.419958174228668	-0.796033143997192	0.0697472617030144	0.243709444999695	1.1978862285614	1.20195317268372	0.282154083251953	Discard	Keep	+	1%_21%	+_Discard	+_Keep	6	6	4	21834	0	26034	367711768	750900416	0,489694476127625	-2.04209	1,6601286417841	-1,46285146661103	-3,07252841290967	Q9NUP9;G3V1D4	Q9NUP9;G3V1D4	Protein lin-7 homolog C	LIN7C
0.14273989200592	-0.241604566574097	-1.74229288101196	-1.20782399177551	0.486359983682632	0.856517314910889	0.827895283699036	0.878208875656128	Discard	Keep	+	1%_21%	+_Discard	+_Keep	6	6	2	21701	0	3345	119786046	539284744	0,222120225429535	-4.50207	1,86199517040528	-1,52449075132608	-3,44357902567824	Q3MHD2;Q3MHD2-2	Q3MHD2;Q3MHD2-2	Protein LSM12 homolog	LSM12
-0.196817606687546	-0.566706359386444	-1.88129663467407	-0.295644760131836	0.519191861152649	0.314008593559265	1.51459860801697	0.592666387557983	Discard	Keep	+	1%_21%	+_Discard	+_Keep	5	5	5	18275	0	32173	264836068	703314696	0,376554161310196	-2.65566	1,68252717464427	-1,47023270279169	-3,112907162389	P61244;P61244-2;Q6V3B1;G3V563;G3V5L1;G3V2R5;P61244-3;P61244-4;G3V570;G3V302;P61244-6;P61244-5	P61244;P61244-2;Q6V3B1;G3V563;G3V5L1;G3V2R5;P61244-3;P61244-4	Protein max	MAX
-0.834315896034241	-0.137749180197716	-1.2803760766983	-1.03818023204803	0.350901514291763	0.422564089298248	1.47997355461121	1.03718221187592	Discard	Keep	+	1%_21%	+_Discard	+_Keep	4	4	4	25863	0	33178	141858530	329559440	0,43044900894165	-2.32316	2,3987325474017	-1,64531068876386	-4,52584741737608	Q9NYP9	Q9NYP9	Protein Mis18-alpha	MIS18A
-1.50846838951111	-0.23743300139904	-0.0937674194574356	-1.39431810379028	0.735507965087891	0.735918462276459	1.08049845695496	0.682061910629272	Discard	Keep	+	1%_21%	+_Discard	+_Keep	11	11	11	773	0	33771	151927938	239984916	0,633072853088379	-1.5796	2,24978099629601	-1,61699342727661	-4,20950223519826	Q9Y2Z2-4;Q9Y2Z2-6;Q9Y2Z2;Q9Y2Z2-2;Q9Y2Z2-5;H0YB81;H7C2S9;H0YBI9;Q9Y2Z2-3;H0YC00;E7EWX0;E9PHR8;E7EWI1	Q9Y2Z2-4;Q9Y2Z2-6;Q9Y2Z2;Q9Y2Z2-2;Q9Y2Z2-5	Protein MTO1 homolog, mitochondrial	MTO1
Ri-1 1%.1	Ri-1 1%.2	Ri-1 1%.3	Ri-1 1%.4	Ri-1 21%.1	Ri-1 21%.2	Ri-1 21%.3	Ri-1 21%.4	x>=1.5	x<=0.66	Student's T-test Significant 1%_21%	Student's T-test significant	Student's T-test Significant 1%_21%_x>=1.5	Student's T-test Significant 1%_21%_x<=0.66	Peptides	Razor + unique peptides	Unique peptides	Mol. weight [kDa]	Q-value	Score	1%	21%	1%_x/y_21%	#VALUE!	-Log Student's T-test p-value 1%_21%	Student's T-test Difference 1%_21%	Student's T-test Test statistic 1%_21%	Protein IDs	Majority protein IDs	Protein names	Gene names
-0.507444262504578	-0.898762464523315	-0.359207004308701	-1.53909230232239	0.154669478535652	1.31448674201965	0.897196233272552	0.938153624534607	Discard	Keep	+	1%_21%	+_Discard	+_Keep	6	6	6	21639	0	34399	451539040	948051040	0,476281344890594	-2.0996	2,43820996738827	-1,65225302800536	-4,61200691062051	Q9BUH6	Q9BUH6	Protein PAXX	C9orf142
-1.07896745204926	-1.35111880302429	-0.594984591007233	-0.516317844390869	0.843316256999969	1.3037565946579	0.755014479160309	0.639301300048828	Discard	Keep	+	1%_21%	+_Discard	+_Keep	8	8	8	43359	0	32106	206891420	341957816	0,60502028465271	-1.65284	3,43401150069261	-1,77069433033466	-7,18267272664868	Q9BRX2	Q9BRX2	Protein pelota homolog	PELO
-0.306810408830643	-0.960477292537689	-1.48202753067017	-0.590198993682861	1.41725611686707	0.597974002361298	0.974838614463806	0.349445581436157	Discard	Keep	+	1%_21%	+_Discard	+_Keep	16	16	16	59271	0	32331	2906773824	4455701760	0,652371764183044	-1.53287	2,54379163492524	-1,66975713521242	-4,84748014993736	O15355	O15355	Protein phosphatase 1G	PPM1G
-0.94895213842392	-1.42919683456421	-0.0607201084494591	-0.669461309909821	0.0728763118386269	1.16192495822906	0.439479678869247	1.43404948711395	Discard	Keep	+	1%_21%	+_Discard	+_Keep	15	1	1	6747	98745	31544	17920065,5	37026837,5	0,48397508263588	-2.06622	1,97319534375491	-1,55416520684958	-3,65547577451351	P29590-2	P29590-2	Protein PML	PML
-0.812116503715515	-1.32102465629578	-0.883477926254272	-0.410901665687561	0.218746319413185	0.745743811130524	1.1653950214386	1.29763555526733	Discard	Keep	+	1%_21%	+_Discard	+_Keep	3	3	3	13087	0	66868	626778752	1039342352	0,603053212165833	-1.65823	2,85765157934124	-1,71376036480069	-5,59450531361823	Q5XKP0;K7EIR2	Q5XKP0	Protein QIL1	QIL1
-1.77648544311523	-1.11162424087524	0.675585627555847	-0.491024613380432	0.576939523220062	0.685807585716248	0.907114684581757	0.533686876296997	Discard	Keep	+	1%_21%	+_Discard	+_Keep	12	12	12	7987	0	74999	510446096	856174656	0,596193850040436	-1.67731	1,36755828456665	-1,35177433490753	-2,56017698879639	Q9NVU7;E7EW05;Q9NVU7-2;F8W8T7;D6RC74	Q9NVU7;E7EW05;Q9NVU7-2	Protein SDA1 homolog	SDAD1
-1.14787912368774	-1.27715134620667	0.20383882522583	-0.913299798965454	0.883440256118774	0.0664639547467232	1.04487955570221	1.13970768451691	Discard	Keep	+	1%_21%	+_Discard	+_Keep	12	12	12	75483	0	12861	163013096	256023036	0,636712551116943	-1.57057	2,02574026256293	-1,56724572367966	-3,75765058380723	Q5PRF9;M0QZ22;A0A087WZT0;A0A087WUK6;M0R0X3;M0QY61;M0QX45;M0QXV2	Q5PRF9;M0QZ22;A0A087WZT0;A0A087WUK6	Protein Smaug homolog 2	SAMD4B
-0.844174325466156	-1.19979977607727	-0.587815701961517	-0.954271912574768	0.863059639930725	1.12483525276184	1.18927145004272	0.408895343542099	Discard	Keep	+	1%_21%	+_Discard	+_Keep	9	9	9	5765	0	15254	320458832	682515296	0,469526171684265	-2.12981	3,75890332563317	-1,79303085058928	-8,22640537913753	Q9H0W8;Q9H0W8-2;M0QYR7;M0R2N0;M0QZC7;M0QZH1;M0QX70	Q9H0W8;Q9H0W8-2;M0QYR7;M0R2N0;M0QZC7	Protein SMG9	SMG9
-1.41485369205475	-1.35592997074127	-0.44642573595047	-0.13557156920433	0.674323558807373	0.869052350521088	1.12268173694611	0.686723291873932	Discard	Keep	+	1%_21%	+_Discard	+_Keep	2	2	2	77412	0	46712	3498928064	6126134784	0,571147739887238	-1.75086	2,58629955292732	-1,67639047652483	-4,94442706709586	P60059	P60059	Protein transport protein Sec61 subunit gamma	SEC61G
-0.774149000644684	0.553176164627075	-0.449894070625305	-1.99993848800659	0.413918673992157	0.656669676303864	0.869533002376556	0.730684101581573	Discard	Keep	+	1%_21%	+_Discard	+_Keep	6	6	6	19127	0	22501	161311399	432588736	0,372897803783417	-2.6817	1,3302577193646	-1,33540271222591	-2,4965527050483	Q12974;Q12974-3;Q93096;Q12974-4;E9PMY3;E9PML8;E9PJC0;E9PRR9;Q12974-2;A0A0D9SGK2	Q12974;Q12974-3;Q93096;Q12974-4;E9PMY3;E9PML8;E9PJC0;E9PRR9;Q12974-2	Protein tyrosine phosphatase type IVA 2;Protein tyrosine phosphatase type IVA 1	PTP4A2;PTP4A1
-1.30647611618042	-0.437356531620026	-0.384981900453568	-0.646997928619385	0.870938181877136	1.25004780292511	1.3272807598114	-0.672454357147217	Discard	Keep	+	1%_21%	+_Discard	+_Keep	5	5	5	6663	16192	72858	82664523	202452188	0,408316254615784	-2.44908	1,45462939023961	-1,38790621608496	-2,71002020547945	Q9H1C4;E9PNE5;E9PR93	Q9H1C4	Protein unc-93 homolog B1	UNC93B1
-1.50093293190002	-1.43639647960663	0.495675623416901	-0.396547466516495	0.536593019962311	1.15134751796722	0.629618585109711	0.520642161369324	Discard	Keep	+	1%_21%	+_Discard	+_Keep	31	31	31	16901	0	19549	47866090	101550942	0,471350491046906	-2.12156	1,53568355533953	-1,4191006347537	-2,85139262059972	Q9Y4B6;Q9Y4B6-2;Q9Y4B6-3	Q9Y4B6;Q9Y4B6-2;Q9Y4B6-3	Protein VPRBP	VPRBP
0.187695473432541	-1.07071948051453	-1.47663640975952	-0.808554470539093	0.877009570598602	0.259352773427963	1.22024583816528	0.811606645584106	Discard	Keep	+	1%_21%	+_Discard	+_Keep	13	13	8	58951	0	45442	474171856	830787232	0,570750057697296	-1.75208	2,09708623327852	-1,58410742878914	-3,89861437958451	O43865;O43865-2	O43865;O43865-2	Putative adenosylhomocysteinase 2	AHCYL1
-0.923265397548676	-0.864744544029236	-1.24722075462341	-0.530168831348419	0.622739970684052	1.20159935951233	1.19906294345856	0.541997253894806	Discard	Keep	+	1%_21%	+_Discard	+_Keep	51	51	1	13611	0	32331	1144492624	2393152160	0,478236466646194	-2.09102	3,59827846030284	-1,78269976377487	-7,69552780847858	Q7L2E3-2	Q7L2E3-2	Putative ATP-dependent RNA helicase DHX30	DHX30
-1.00750339031219	-1.20348560810089	-0.967972338199615	-0.393549799919128	0.463953822851181	1.08156883716583	1.06508135795593	0.961906969547272	Discard	Keep	+	1%_21%	+_Discard	+_Keep	16	16	16	78873	0	10208	75330784	249084628	0,302430480718613	-3.30655	3,65130620838874	-1,78625553101301	-7,8674750714014	Q9H6R0;Q05BE5;I3L1L6;Q9H6R0-2;I3L0M5	Q9H6R0;Q05BE5;I3L1L6;Q9H6R0-2	Putative ATP-dependent RNA helicase DHX33	DHX33
-0.957421720027924	-1.36140263080597	-0.535292744636536	-0.250771731138229	-0.176100522279739	0.865918159484863	0.904722094535828	1.51034903526306	Discard	Keep	+	1%_21%	+_Discard	+_Keep	13	13	13	56883	0	12871	440773704	731660936	0,602428913116455	-1.65995	1,96645274414298	-1,55244439840317	-3,64246233445976	O43824;H0Y2S1	O43824;H0Y2S1	Putative GTP-binding protein 6	GTPBP6
-2.06901359558105	-0.432772248983383	-0.0968576222658157	-0.379574507474899	0.476623296737671	0.990642189979553	0.874643683433533	0.63630884885788	Discard	Keep	+	1%_21%	+_Discard	+_Keep	8	8	8	5177	0	77466	42599202,75	128877638	0,330539911985397	-3.02535	1,74186932945593	-1,48910899832845	-3,22080370805248	Q8TEA1;U3KQU2	Q8TEA1;U3KQU2	Putative methyltransferase NSUN6	NSUN6
-1.06728398799896	-1.71215713024139	0.372861713171005	-0.574509382247925	0.782197654247284	0.555570065975189	1.12955069541931	0.513770282268524	Discard	Keep	+	1%_21%	+_Discard	+_Keep	9	9	9	945	16469	79634	44644971	82091612	0,543843269348145	-1.83877	1,74650865792672	-1,4905443713069	-3,22929683658557	Q6P2P2;Q6P2P2-2	Q6P2P2;Q6P2P2-2	Putative protein arginine N-methyltransferase 9	PRMT9
-1.33810806274414	-1.16390192508698	0.238546028733253	-0.47390028834343	-0.398345351219177	1.08754539489746	1.28330302238464	0.764861166477203	Discard	Keep	+	1%_21%	+_Discard	+_Keep	2	2	2	49965	6259	18076	33351958	54664702	0,610118687152863	-1.63903	1,40745373410922	-1,36868211999536	-2,62859248492132	Q9NVC3;H3BN87;H3BU46;H3BPV9;H3BP25;H3BMC5;H3BPK8;Q9NVC3-2	Q9NVC3;H3BN87;H3BU46;H3BPV9;H3BP25;H3BMC5;H3BPK8;Q9NVC3-2	Putative sodium-coupled neutral amino acid transporter 7	SLC38A7
0.118339829146862	-1.401247382164	-1.39167535305023	-0.561841249465942	0.601109206676483	0.62923276424408	1.0207405090332	0.985341727733612	Discard	Keep	+	1%_21%	+_Discard	+_Keep	16	16	16	86706	0	24389	427879168	668892304	0,639683187007904	-1.56327	2,25582844050969	-1,61821209080517	-4,22208613885425	Q6P996;Q6P996-4;Q6P996-5;A0A0G2JPZ1;H3BND4;Q6P996-3;Q86XE2;Q6P996-2;J3KNK7;Q6P474;H3BPV5;H3BM88;Q6XYB5;H3BNL6	Q6P996;Q6P996-4;Q6P996-5;A0A0G2JPZ1;H3BND4;Q6P996-3	Pyridoxal-dependent decarboxylase domain-containing protein 1	PDXDC1
-0.655824244022369	-0.614456295967102	-0.718997955322266	-0.675055742263794	-0.940936744213104	1.1771194934845	1.19474506378174	1.23340654373169	Discard	Keep	+	1%_21%	+_Discard	+_Keep	49	49	5	58061	0	32331	1343828192	6770461584	0,198483988642693	-5.03819	1,32303368130012	-1,33216714859009	-2,4842664254164	P14618-2;H3BTN5;H3BR70;H3BQ34;H3BUW1;H3BTJ2;H3BT25;H3BU13;H3BN34;H3BQZ3	P14618-2;H3BTN5;H3BR70;H3BQ34	Pyruvate kinase PKM;Pyruvate kinase	PKM
-1.20853686332703	-1.33742272853851	-1.06137371063232	0.753755807876587	0.717535793781281	0.598987340927124	0.74438488483429	0.792669415473938	Discard	Keep	+	1%_21%	+_Discard	+_Keep	15	15	15	35206	0	31842	2763021536	7840443264	0,352406293153763	-2.83763	1,55658857659618	-1,42678873240948	-2,88817919121001	Q08257;Q08257-3;A6NP24;C9JH92;Q08257-2	Q08257;Q08257-3;A6NP24;C9JH92	Quinone oxidoreductase	CRYZ
-2.22521686553955	-0.0382619835436344	-0.100061886012554	-0.29952546954155	0.405691385269165	0.563547194004059	0.970448732376099	0.723378777503967	Discard	Keep	+	1%_21%	+_Discard	+_Keep	12	12	7	73051	0	42615	74428217,25	237194908	0,313785046339035	-3.1869	1,32162346472439	-1,33153307344764	-2,48186931236582	P04049;P04049-2;H7C155;A0A0B4J1W9	P04049;P04049-2;H7C155	RAF proto-oncogene serine/threonine-protein kinase	RAF1
-1.06475222110748	-0.906884372234344	-0.496943354606628	-1.02445816993713	0.297243535518646	1.47677052021027	0.841213464736938	0.877810478210449	Discard	Keep	+	1%_21%	+_Discard	+_Keep	12	12	11	2211	0	22338	36727087	57927479	0,634018421173096	-1.57724	3,15654560982181	-1,74651902914047	-6,37971632080869	Q6GYQ0-4;Q6GYQ0;Q6GYQ0-2;Q6GYQ0-7;Q6GYQ0-5;Q6GYQ0-6;H0YJB5;Q6GYQ0-3;H0YJ04	Q6GYQ0-4;Q6GYQ0;Q6GYQ0-2;Q6GYQ0-7;Q6GYQ0-5;Q6GYQ0-6	Ral GTPase-activating protein subunit alpha-1	RALGAPA1
-0.587584257125854	-0.778611958026886	-1.61679840087891	-0.121320627629757	1.00055193901062	-0.0917851999402046	1.09589755535126	1.09965109825134	Discard	Keep	+	1%_21%	+_Discard	+_Keep	24	24	24	63541	0	27499	3481001280	5357594944	0,649732053279877	-1.5391	1,96533290526425	-1,5521576590836	-3,64030312811121	P46060;B0QYT5;B0QYT4;H0Y4Q3;B0QYT6	P46060	Ran GTPase-activating protein 1	RANGAP1
-1.16417479515076	-1.01901984214783	-0.736527621746063	-0.477790296077728	0.567976951599121	1.30308902263641	1.3332587480545	0.193187803030014	Discard	Keep	+	1%_21%	+_Discard	+_Keep	5	5	5	67256	0	67912	493728320	787718000	0,626783072948456	-1.59545	2,74147871168135	-1,69875627011061	-5,30936002219278	Q6VN20;A0A0D9SEU5;R4GMX8;Q6VN20-3;Q6VN20-2;R4GMX7;R4GNA3;R4GN91	Q6VN20;A0A0D9SEU5;R4GMX8;Q6VN20-3;Q6VN20-2	Ran-binding protein 10	RANBP10
-0.600356936454773	-0.666004002094269	-0.581004440784454	-1.59863793849945	0.382069706916809	1.0252206325531	0.9019455909729	1.13676750659943	Discard	Keep	+	1%_21%	+_Discard	+_Keep	20	19	19	5412	0	30169	2193037312	5422457792	0,404436022043228	-2.47258	2,93500016926496	-1,7230016887188	-5,79036109371977	Q9UN86;Q9UN86-2;D6RAC7;D6RB17;D6RGJ4;D6RBM9;D6REX8;D6RBR0;D6RE13;D6RBW8;D6R9X5;D6R9A4	Q9UN86;Q9UN86-2	Ras GTPase-activating protein-binding protein 2	G3BP2
-0.830977320671082	-1.1473400592804	-0.100043892860413	-0.871730625629425	-0.496957421302795	1.19255447387695	1.04775631427765	1.20673871040344	Discard	Keep	+	1%_21%	+_Discard	+_Keep	6	6	6	23058	0	17595	961950352	1745907136	0,550974488258362	-1.81497	1,69737157936897	-1,47504599392414	-3,13977079246567	Q15771;E9PS06;E9PMJ1;E9PLM3;E9PRF7;E9PNB9;H0YDK7;Q15771-2;E9PJQ5;E9PPW9;E9PRX0;E9PQ07;E9PI18	Q15771;E9PS06;E9PMJ1;E9PLM3;E9PRF7;E9PNB9;H0YDK7;Q15771-2;E9PJQ5	Ras-related protein Rab-30	RAB30
0.0571838058531284	-0.811585366725922	-1.40649271011353	-0.526898384094238	-0.260352551937103	0.44387474656105	0.668302237987518	1.8359682559967	Discard	Keep	+	1%_21%	+_Discard	+_Keep	3	3	3	29264	15406	55355	28990961	60859663	0,47635754942894	-2.09926	1,34945109950036	-1,34389633592218	-2,52925166610418	Q6NUK4;X6R3X1;Q6NUK4-2	Q6NUK4;X6R3X1;Q6NUK4-2	Receptor expression-enhancing protein 3;Receptor expression-enhancing protein	REEP3
-1.87711846828461	-0.429772555828094	0.00784395262598991	-0.783735811710358	0.463654100894928	1.14009118080139	0.55396693944931	0.925070762634277	Discard	Keep	+	1%_21%	+_Discard	+_Keep	7	7	7	56887	0	49748	185465878	331176432	0,560021340847015	-1.78565	1,92403758303553	-1,54139146674424	-3,56109640261764	Q9Y572;H0YJN5;G3V2L1;Q9Y572-3;Q9Y572-2	Q9Y572	Receptor-interacting serine/threonine-protein kinase 3	RIPK3
-1.22094810009003	-1.07096803188324	-0.207007318735123	-0.850013196468353	0.0873290523886681	1.01068997383118	1.25680387020111	0.994113743305206	Discard	Keep	+	1%_21%	+_Discard	+_Keep	9	9	9	63574	0	16524	453615872	780497344	0,581188261508942	-1.72061	2,57383030765468	-1,67446832172573	-4,91585806205276	Q9BWE0;Q9BWE0-4;C9JZE3;C9JYJ8;E7EVL6	Q9BWE0;Q9BWE0-4;C9JZE3;C9JYJ8	Replication initiator 1	REPIN1
0.542858302593231	-0.516317069530487	-1.29096901416779	-1.6233172416687	0.705799579620361	0.756928443908691	0.553557157516479	0.871459901332855	Discard	Keep	+	1%_21%	+_Discard	+_Keep	6	6	6	43589	1657	82064	43628319,5	161055242	0,270890384912491	-3.69153	1,60446879546516	-1,44387252628803	-2,97297080745549	Q8WWV3;Q8WWV3-2;G3V1R2;Q8WWV3-3	Q8WWV3;Q8WWV3-2	Reticulon-4-interacting protein 1, mitochondrial	RTN4IP1
-0.824590802192688	-1.19355487823486	-0.955486357212067	-0.45813325047493	1.4127414226532	0.770332634449005	1.07366228103638	0.175029009580612	Discard	Keep	+	1%_21%	+_Discard	+_Keep	6	6	6	26106	0	86443	238676280	513654000	0,464663535356522	-2.15209	2,87499558725016	-1,71588265895844	-5,63799591596043	Q8TA86;C9J6V2	Q8TA86;C9J6V2	Retinitis pigmentosa 9 protein	RP9
-0.955331385135651	-1.01461863517761	0.0460836254060268	-0.776217341423035	-0.669446527957916	1.19259333610535	0.761903464794159	1.41503345966339	Discard	Keep	+	1%_21%	+_Discard	+_Keep	9	9	9	36864	0	20306	623796800	987409760	0,631750643253326	-1.5829	1,36355062841013	-1,35004186723381	-2,5533257134966	Q9HBH5;C9J2C7	Q9HBH5	Retinol dehydrogenase 14	RDH14
-0.380412608385086	-1.3716893196106	-1.46438980102539	-0.102236717939377	0.780308961868286	1.04659914970398	0.776316285133362	0.715504109859467	Discard	Keep	+	1%_21%	+_Discard	+_Keep	4	4	4	32064	0	12633	15078444	168191548	0,089650422334671	-11.1544	2,48001320978671	-1,65936423838139	-4,70434779416459	O60930	O60930	Ribonuclease H1	RNASEH1
-1.48333382606506	-1.01077032089233	0.0523873083293438	-0.927679300308228	0.604588806629181	0.949217438697815	0.906055450439453	0.909534513950348	Discard	Keep	+	1%_21%	+_Discard	+_Keep	3	3	3	17631	0	56996	193300008	344596048	0,560946702957153	-1.7827	2,64169142406594	-1,68469808716327	-5,07267247355783	Q8N5L8	Q8N5L8	Ribonuclease P protein subunit p25-like protein	RPP25L
-1.5966899394989	0.0795347914099693	-1.56061780452728	0.334977626800537	0.648433566093445	0.737041771411896	0.755022048950195	0.602297902107239	Discard	Keep	+	1%_21%	+_Discard	+_Keep	8	8	8	35564	0	43547	276688357	877461040	0,315328359603882	-3.1713	1,41399736224639	-1,37139765359461	-2,6398520208827	P78346-2;P78346;Q5VU10;Q5VU11	P78346-2;P78346;Q5VU10;Q5VU11	Ribonuclease P protein subunit p30	RPP30
-1.11460268497467	-1.05326426029205	-1.13568317890167	-0.291612833738327	0.740905344486237	1.02271032333374	0.941476106643677	0.890071094036102	Discard	Keep	+	1%_21%	+_Discard	+_Keep	16	16	16	54972	0	32331	4025657920	6539260416	0,615613639354706	-1.6244	3,83662910689513	-1,79758145660162	-8,49433979070264	O76021;J3QSV6;I3L3U9;I3L3C4;O76021-2;I3L234;J3KPU7;I3L2F2;I3L4T8;I3L1Y4	O76021;J3QSV6;I3L3U9;I3L3C4	Ribosomal L1 domain-containing protein 1	RSL1D1
-0.38526251912117	-0.971316456794739	-1.77286195755005	-0.0193306710571051	1.15306210517883	0.688772737979889	0.884446918964386	0.422489881515503	Discard	Keep	+	1%_21%	+_Discard	+_Keep	19	19	19	41401	0	20975	2105357152	3564725632	0,590608477592468	-1.69317	2,05543257085812	-1,57438581204042	-3,81599786320356	Q8TDN6	Q8TDN6	Ribosome biogenesis protein BRX1 homolog	BRIX1
-1.13512647151947	-0.869661271572113	-1.37230741977692	-0.0837288275361061	0.719888389110565	0.881916582584381	1.0725953578949	0.786423623561859	Discard	Keep	+	1%_21%	+_Discard	+_Keep	10	10	10	30065	0	46064	619600944	1815816544	0,341224431991577	-2.93062	3,00067924500211	-1,73041198588908	-5,9605955977036	O95478;A0A0A0MQZ6;H0YAI9	O95478;A0A0A0MQZ6	Ribosome biogenesis protein NSA2 homolog	NSA2
-1.27134048938751	-0.535293400287628	-0.334274232387543	-1.33801901340485	0.604945421218872	0.826844334602356	0.865290105342865	1.18184721469879	Discard	Keep	+	1%_21%	+_Discard	+_Keep	12	12	12	35582	0	14522	989174576	1591890336	0,621383666992188	-1.60931	3,08587817964324	-1,7394635528326	-6,18699382220628	Q9H7B2;Q5VXN0;U3KQN5;Q5VXM9	Q9H7B2;Q5VXN0	Ribosome production factor 2 homolog	RPF2
-0.238026022911072	-1.28228271007538	-1.09195470809937	-0.69611519575119	0.241825327277184	1.25018382072449	0.48918879032135	1.32718062400818	Discard	Keep	+	1%_21%	+_Discard	+_Keep	2	2	2	48964	44072	41286	127223380	205278252	0,619760632514954	-1.61353	2,44945162163839	-1,65418929979205	-4,63672624748158	Q96EX2;A0A087X026;F8W6L4;Q96EX2-4;Q96EX2-2;Q96EX2-3;Q96EX2-5	Q96EX2;A0A087X026;F8W6L4;Q96EX2-4;Q96EX2-2;Q96EX2-3;Q96EX2-5	RING finger and transmembrane domain-containing protein 2	RNFT2
-0.151539668440819	-1.90922784805298	-1.08359134197235	0.347419887781143	0.938237249851227	0.65950334072113	0.636625468730927	0.56257289648056	Discard	Keep	+	1%_21%	+_Discard	+_Keep	5	5	3	74106	0	15433	10165449,25	60096331	0,169152572751045	-5.91182	1,48142645379839	-1,39846948161721	-2,75654542264024	Q9NYV6;F5H148;H3BMT1;Q9NYV6-3;Q9NYV6-2;Q9NYV6-4	Q9NYV6;F5H148;H3BMT1;Q9NYV6-3;Q9NYV6-2	RNA polymerase I-specific transcription initiation factor RRN3	RRN3
-1.15219831466675	-0.788357138633728	-0.840239405632019	-0.923115730285645	0.747841536998749	1.1025904417038	0.918891787528992	0.934586822986603	Discard	Keep	+	1%_21%	+_Discard	+_Keep	5	5	5	42205	0	64689	87804492	333611016	0,263194233179092	-3.79948	5,59390222025272	-1,85195529460907	-17,1138189724911	Q96CM3;Q96CM3-2;E9PJV3	Q96CM3;Q96CM3-2	RNA pseudouridylate synthase domain-containing protein 4	RPUSD4
-1.07897686958313	-1.10918974876404	-0.977481961250305	-0.422746688127518	1.21611166000366	0.792154014110565	1.03139543533325	0.548734068870544	Discard	Keep	+	1%_21%	+_Discard	+_Keep	23	23	23	85737	0	19238	908796816	1493347328	0,608563601970673	-1.64321	3,77838573999118	-1,79419761151075	-8,29287099885872	Q9NW13;Q9NW13-2;C9JE21;C9JAA9;H7C5G8	Q9NW13;Q9NW13-2	RNA-binding protein 28	RBM28
-0.656293869018555	-0.412664353847504	-1.03252983093262	-0.845421433448792	-0.327064156532288	1.54105710983276	1.42984235286713	0.303074240684509	Discard	Keep	+	1%_21%	+_Discard	+_Keep	4	3	3	54173	0	93857	35605245,5	169137009	0,21051125228405	-4.75034	1,69244300337994	-1,47345475852489	-3,13084243388783	A1L020	A1L020	RNA-binding protein MEX3A	MEX3A
-0.846380293369293	-0.734039783477783	-1.40005648136139	-0.615375220775604	1.04120111465454	0.619344890117645	1.14874565601349	0.78656017780304	Discard	Keep	+	1%_21%	+_Discard	+_Keep	11	11	11	46674	0	19722	238881928	696696464	0,342878043651581	-2.91649	3,84270928263726	-1,7979259043932	-8,51561354064869	Q9ULX3;H3BUR4	Q9ULX3	RNA-binding protein NOB1	NOB1
-1.42520570755005	-1.10123026371002	-0.440626055002213	-0.476990580558777	0.854028224945068	1.253262758255	0.40294536948204	0.933816194534302	Discard	Keep	+	1%_21%	+_Discard	+_Keep	6	6	5	12573	0	2352	6836005,5	33220999	0,205773621797562	-4.85971	2,92660617779448	-1,72202628850937	-5,7688673667252	Q5TC82;Q5TC82-2	Q5TC82;Q5TC82-2	Roquin-1	RC3H1
-1.20023441314697	-1.24763298034668	-0.212721601128578	-0.866499125957489	0.990180313587189	1.07137513160706	0.780637621879578	0.684895038604736	Discard	Keep	+	1%_21%	+_Discard	+_Keep	5	2	2	34803	29976	47057	5080804608	8430967936	0,602635979652405	-1.65938	3,34541811372746	-1,76354405656457	-6,91796643912022	A6NHQ2	A6NHQ2	rRNA/tRNA 2-O-methyltransferase fibrillarin-like protein 1	FBLL1
-1.35983216762543	-1.29135000705719	-0.316245645284653	-0.537541270256042	0.813679814338684	0.888422727584839	0.807156562805176	0.995709955692291	Discard	Keep	+	1%_21%	+_Discard	+_Keep	5	5	5	21163	0	17454	241759352	1082120176	0,223412662744522	-4.47602	3,21955701623225	-1,75248453766108	-6,55546412967287	Q9BQE4;E9PJB8;E9PN30	Q9BQE4;E9PJB8;E9PN30	Selenoprotein S	VIMP
-0.954036831855774	-1.08908545970917	-0.76824939250946	-0.863347053527832	0.958526372909546	1.2614129781723	0.728849709033966	0.725929617881775	Discard	Keep	+	1%_21%	+_Discard	+_Keep	17	17	17	23317	0	15351	41787890	96437872	0,433314085006714	-2.30779	4,8500666561403	-1,83735935389996	-12,7751313661795	Q14674;Q14674-2;H3BRX7;H3BM31	Q14674;Q14674-2	Separin	ESPL1
-0.466789722442627	-0.230237394571304	-1.78159761428833	-0.76540219783783	0.933523178100586	0.440755516290665	1.21367239952087	0.656075835227966	Discard	Keep	+	1%_21%	+_Discard	+_Keep	3	1	1	55098	1	-2	14181571,5	60172290	0,235682785511017	-4.24299	2,27488922536054	-1,62201346457005	-4,26188932227627	O43236;J3QRT6;J3KSZ7;O43236-2;O43236-3;O43236-4;O43236-5	O43236;J3QRT6;J3KSZ7;O43236-2;O43236-3;O43236-4;O43236-5	Septin-4	04.wrz
-0.418278396129608	-0.389245182275772	0.0472931265830994	-2.07885956764221	0.211581572890282	0.837076902389526	0.921204149723053	0.869227349758148	Discard	Keep	+	1%_21%	+_Discard	+_Keep	9	9	9	47687	0	32331	457130956	1719932352	0,265784233808517	-3.76245	1,53688127144687	-1,41954499855638	-2,85349650708638	Q13501;Q13501-2;E7EMC7;E9PFW8;E3W990;C9JRJ8;D6RBF1;C9J6J8	Q13501;Q13501-2;E7EMC7	Sequestosome-1	SQSTM1
-0.306237131357193	-1.06124246120453	-0.535907864570618	-1.23511815071106	0.741851985454559	0.520870983600616	0.105323515832424	1.77045905590057	Discard	Keep	+	1%_21%	+_Discard	+_Keep	16	15	15	53082	0	45575	1162485264	1763685088	0,659122884273529	-1.51717	2,03401215313834	-1,56925278715789	-3,7738604707741	P34896;P34896-2;P34896-3;P34896-4;J3KRK5;J3KRZ5	P34896;P34896-2;P34896-3;P34896-4	Serine hydroxymethyltransferase, cytosolic	SHMT1
-0.321785569190979	-1.21080327033997	-1.47338235378265	-0.424614816904068	0.806808531284332	0.721981048583984	1.17298471927643	0.728811621665955	Discard	Keep	+	1%_21%	+_Discard	+_Keep	5	3	3	32287	0	6181	35673222	165233196	0,215896219015121	-4.63186	2,87015240811798	-1,71529298275709	-5,62582695028349	Q9BRL6;Q9BRL6-2	Q9BRL6;Q9BRL6-2	Serine/arginine-rich splicing factor 8	SRSF8
-1.14688980579376	-1.70116245746613	-0.0172024145722389	-0.234192445874214	0.717417657375336	0.592747688293457	0.528072357177734	1.26120948791504	Discard	Keep	+	1%_21%	+_Discard	+_Keep	8	8	8	17246	15513	57166	8898941,5	20950889,5	0,424752444028854	-2.35431	1,95586989116525	-1,54972357861698	-3,62208111469741	Q6DT37	Q6DT37	Serine/threonine-protein kinase MRCK gamma	CDC42BPG
-1.44351005554199	-1.42773532867432	0.54364001750946	-0.365585833787918	0.353650510311127	0.936466991901398	0.220753133296967	1.1823205947876	Discard	Keep	+	1%_21%	+_Discard	+_Keep	12	10	10	11203	0	48878	21310220,25	37611720,5	0,566584587097168	-1.76496	1,35562173996678	-1,34659560769796	-2,53978198705018	Q16513;Q16513-4;Q16513-2;Q16513-3;Q16513-5;B1AL79;A0A0A0MRN8;H0Y5V5	Q16513;Q16513-4;Q16513-2;Q16513-3;Q16513-5;B1AL79	Serine/threonine-protein kinase N2	PKN2
-1.05478310585022	-1.00028276443481	-0.592639803886414	-0.932265222072601	1.29358661174774	0.81691586971283	1.08554756641388	0.383920758962631	Discard	Keep	+	1%_21%	+_Discard	+_Keep	14	14	14	68254	0	98714	228305992	421758656	0,541319012641907	-1.84734	3,70941330728351	-1,78998542577028	-8,05961657646381	P53350;I3L2H5;I3L387;I3L309	P53350	Serine/threonine-protein kinase PLK1	PLK1
-0.537777304649353	-0.729886889457703	-1.59726250171661	-0.675940454006195	0.811858594417572	0.954296827316284	0.999872863292694	0.774838805198669	Discard	Keep	+	1%_21%	+_Discard	+_Keep	12	12	12	65582	0	24846	61049596,5	386995720	0,157752647995949	-6.33904	3,43066939877145	-1,77043356001377	-7,17253936940327	Q9BRS2	Q9BRS2	Serine/threonine-protein kinase RIO1	RIOK1
-0.923188865184784	-1.27371275424957	-1.11930632591248	-0.126475617289543	1.2411333322525	0.528819978237152	0.699508547782898	0.973221659660339	Discard	Keep	+	1%_21%	+_Discard	+_Keep	3	3	3	59092	37111	20698	30562623,5	63415927	0,481939226388931	-2.07495	2,92074945465612	-1,72134177014232	-5,75390542182629	O14730;B4E1Q4;O14730-2;J3QLP4;J3QQL5	O14730;B4E1Q4;O14730-2	Serine/threonine-protein kinase RIO3	RIOK3
-0.852285981178284	-0.649079859256744	-1.38069796562195	-0.626568913459778	0.671925067901611	0.636728763580322	1.47182834148407	0.728150427341461	Discard	Keep	+	1%_21%	+_Discard	+_Keep	7	7	7	46898	0	15996	659949728	1102514208	0,598586142063141	-1.6706	3,2395554141943	-1,75431632995605	-6,61203002882471	Q9NY27;C9IZ04;Q9NY27-2;Q9NY27-3;F8WDK3;F8WCA1;H7C559;C9IZF4	Q9NY27;C9IZ04;Q9NY27-2;Q9NY27-3	Serine/threonine-protein phosphatase 4 regulatory subunit 2	PPP4R2
-1.86141037940979	-0.83135575056076	-0.295511394739151	-0.21607694029808	0.538818657398224	1.03553152084351	0.912148058414459	0.717856228351593	Discard	Keep	+	1%_21%	+_Discard	+_Keep	8	8	8	54493	0	21111	18570239,5	117954636	0,157435432076454	-6.35181	2,17858079313644	-1,60217723250389	-4,06292516713898	P58004;P58005;P58005-4	P58004	Sestrin-2	SESN2
-1.23372304439545	0.10900454223156	-0.22856841981411	-1.45299327373505	-0.292511612176895	0.951952278614044	1.0169552564621	1.12988424301147	Discard	Keep	+	1%_21%	+_Discard	+_Keep	9	9	8	67737	0	8319	64883338	100600840	0,644958198070526	-1.55049	1,493482361987	-1,40314009040594	-2,77754427993266	O14492;A0A0A0MTI2;C9JK89	O14492;A0A0A0MTI2;C9JK89	SH2B adapter protein 2	SH2B2
-0.790989756584167	-1.40560126304626	-0.147606045007706	-1.08828663825989	0.789676606655121	0.759438216686249	1.27228271961212	0.611086130142212	Discard	Keep	+	1%_21%	+_Discard	+_Keep	33	33	32	87334	0	32331	3824773504	6833789568	0,559685587882996	-1.78672	2,87795480171811	-1,71624184399843	-5,64544062876051	P42224;P42224-2;J3KPM9;E7EPD2;D2KFR9;E7ENM1;E9PH66;H7BZ88;H7BZB5	P42224;P42224-2;J3KPM9	Signal transducer and activator of transcription 1-alpha/beta;Signal transducer and activator of transcription	STAT1
-0.684361636638641	-1.77291715145111	-0.426260590553284	-0.429359823465347	0.501013934612274	1.23599779605865	0.819166541099548	0.756720900535583	Discard	Keep	+	1%_21%	+_Discard	+_Keep	21	21	21	83125	0	30895	367019112	600878528	0,61080414056778	-1.63719	2,46270662688959	-1,65644959360361	-4,66597903150545	P40763-3;P40763;P40763-2;G8JLH9	P40763-3;P40763;P40763-2;G8JLH9	Signal transducer and activator of transcription 3;Signal transducer and activator of transcription	STAT3
-0.907146215438843	-0.120615266263485	-1.05589437484741	-1.09352397918701	-0.133089929819107	1.11454713344574	0.796777725219727	1.39894497394562	Discard	Keep	+	1%_21%	+_Discard	+_Keep	3	3	3	21126	0	11514	517172480	955163984	0,541448891162872	-1.8469	2,11679198320608	-1,58858993463218	-3,93801667624464	Q9Y3P8;A0A087WXW3	Q9Y3P8;A0A087WXW3	Signaling threshold-regulating transmembrane adapter 1	SIT1
0.1044557467103	-1.63619017601013	-1.20870423316956	0.0531142130494118	0.304228007793427	0.390640586614609	1.55214548110962	0.440310329198837	Discard	Keep	+	1%_21%	+_Discard	+_Keep	5	5	5	76975	84757	16404	13544087,25	136006244	0,0995843037962914	-10.0417	1,34891754760894	-1,34366221353412	-2,52834155827045	P12757;P12757-3;P12757-5;C9J8R9;P12757-4;P12757-2	P12757;P12757-3;P12757-5	Ski-like protein	SKIL
-1.12472867965698	-0.824848175048828	-0.488644957542419	-0.900982975959778	-0.110799431800842	1.16128468513489	1.03461062908173	1.25410878658295	Discard	Keep	+	1%_21%	+_Discard	+_Keep	4	4	4	97251	0	14021	3065383872	4989508544	0,614365875720978	-1.62769	2,5428172146747	-1,66960236430168	-4,84527250961177	P62306;A0A0B4J254;F8W0W6	P62306;A0A0B4J254;F8W0W6	Small nuclear ribonucleoprotein F	SNRPF
0.207587614655495	-0.528185725212097	-1.66511571407318	-1.1352961063385	0.848816871643066	0.864135026931763	0.423060417175293	0.984997630119324	Discard	Keep	+	1%_21%	+_Discard	+_Keep	4	1	1	11637	25815	24215	140658728	267657320	0,52551794052124	-1.90288	1,99837209338789	-1,56050496920943	-3,70426281221907	P55854;A8MUA9;A8MU27;P55854-2;Q6EEV6	P55854;A8MUA9;A8MU27;P55854-2;Q6EEV6	Small ubiquitin-related modifier 3;Small ubiquitin-related modifier 4	SUMO3;SUMO4
-1.13220405578613	-0.778439164161682	-1.1289314031601	-0.107434019446373	0.46414041519165	-0.00225751777179539	1.39611804485321	1.2890077829361	Discard	Keep	+	1%_21%	+_Discard	+_Keep	2	2	2	46752	16692	2886	13369660	21044817,75	0,635294616222382	-1.57407	2,0517268441329	-1,57350434194086	-3,80869136575424	Q92966;Q5T282	Q92966;Q5T282	snRNA-activating protein complex subunit 3	SNAPC3
-1.12945377826691	-0.622995615005493	-0.937275767326355	-0.97554212808609	0.75448739528656	0.755361199378967	1.22485780715942	0.930560946464539	Discard	Keep	+	1%_21%	+_Discard	+_Keep	5	5	5	69829	0	11038	119994686	221494460	0,541750252246857	-1.84587	4,67881616304786	-1,83263365924358	-11,9355940176606	P31641;A0A087WYN0;A0A087WY96;C9JPV1;P31641-2	P31641;A0A087WYN0;A0A087WY96	Sodium- and chloride-dependent taurine transporter;Transporter	SLC6A6
-1.413214802742	-1.45208239555359	-0.171977490186691	-0.0459467247128487	0.225366845726967	0.714954137802124	1.02332246303558	1.11957800388336	Discard	Keep	+	1%_21%	+_Discard	+_Keep	21	21	20	13145	0	10872	182778272	279433624	0,654102623462677	-1.52881	1,92486419880872	-1,54161071591079	-3,56267402890198	P55011;P55011-3;G3XAL9;H0YMG9;H0YLJ2	P55011;P55011-3;G3XAL9	Solute carrier family 12 member 2	SLC12A2
-0.870509743690491	-1.70860707759857	0.561261713504791	-0.908816754817963	0.782415390014648	0.767981290817261	0.816348731517792	0.559926450252533	Discard	Keep	+	1%_21%	+_Discard	+_Keep	12	12	12	52569	0	11245	467951496	757275312	0,61794102191925	-1.61828	1,66158555287881	-1,46333593130112	-3,07514923317377	Q9Y5X2;C9J271;C9J014;C9J8E6;C9JCB9;C9IYC5	Q9Y5X2;C9J271	Sorting nexin-8	SNX8
-0.934457123279572	-0.131031259894371	-1.12530934810638	-1.24390733242035	0.78669548034668	0.563126504421234	0.73697155714035	1.34791159629822	Discard	Keep	+	1%_21%	+_Discard	+_Keep	21	21	21	13442	0	12247	122868764	222804920	0,551463425159454	-1.81336	2,8871510215936	-1,71735255047679	-5,66862183948311	Q96R06;K7ELG0;K7ELC8;E9PMD0;J3KTQ0;F5GZT2;J3KSV2;J3QRV8;J3QS12	Q96R06	Sperm-associated antigen 5	SPAG5
-1.57115745544434	-0.354471117258072	-1.38936924934387	0.194418489933014	0.827280044555664	0.758942604064941	0.758299291133881	0.776057422161102	Discard	Keep	+	1%_21%	+_Discard	+_Keep	5	5	5	29484	16383	77348	79615487	279208328	0,285147249698639	-3.50696	1,99750835582343	-1,56028967350721	-3,70258394040383	Q96BD8;Q96BD8-2;K7EPW0;K7EP61	Q96BD8;Q96BD8-2	Spindle and kinetochore-associated protein 1	SKA1
-0.991969704627991	-1.0124306678772	-0.831661701202393	-0.897382318973541	0.966692686080933	0.958241045475006	0.958789885044098	0.849720776081085	Discard	Keep	+	1%_21%	+_Discard	+_Keep	15	15	15	48115	0	32331	1278008512	9308882176	0,1372891664505	-7.2839	7,57846041084661	-1,86672219634056	-36,9084333019062	P37268;E9PNM1;P37268-2;P37268-5;P37268-4;P37268-3;E9PJG4;E9PS69	P37268;E9PNM1;P37268-2;P37268-5;P37268-4;P37268-3	Squalene synthase	FDFT1
-0.480760723352432	-1.15287911891937	-1.45104074478149	-0.443457663059235	0.859708905220032	0.785409390926361	1.00752246379852	0.875497460365295	Discard	Keep	+	1%_21%	+_Discard	+_Keep	17	17	14	74324	0	32331	1178947280	2445080448	0,482171148061752	-2.07395	3,35171728917681	-1,76406911760569	-6,93652220772871	Q96SB4;H3BLV9;Q5R363;Q96SB4-4;Q96SB4-3;D6RBF8;D6RBM8;Q9UPE1;A8MPY5;E7ETV6;Q9UPE1-3;Q9UPE1-4;H7C2I2	Q96SB4;H3BLV9;Q5R363;Q96SB4-4;Q96SB4-3	SRSF protein kinase 1	SRPK1
-0.334622472524643	-0.373766183853149	-1.68667352199554	-0.467067331075668	-0.0579892694950104	0.269479542970657	1.10579657554626	1.54484260082245	Discard	Keep	+	1%_21%	+_Discard	+_Keep	3	3	3	48368	0	24077	32509253,5	52700376	0,616869509220123	-1.62109	1,56838496419833	-1,43106473982334	-2,9089991961629	Q7RTN6;Q7RTN6-4;Q7RTN6-6;Q7RTN6-2;Q7RTN6-5;Q7RTN6-3;J3QS66;Q86YC8	Q7RTN6;Q7RTN6-4;Q7RTN6-6;Q7RTN6-2;Q7RTN6-5;Q7RTN6-3;J3QS66;Q86YC8	STE20-related kinase adapter protein alpha	STRADA
0.212464645504951	-0.0905410200357437	-1.42234444618225	-1.59282064437866	0.265019744634628	0.80136775970459	0.861482560634613	0.965371370315552	Discard	Keep	+	1%_21%	+_Discard	+_Keep	2	2	2	12806	44254	42325	64490328,5	361776428	0,178260177373886	-5.60978	1,61236261230661	-1,44662072509527	-2,98702417045449	A6NFY7	A6NFY7	Succinate dehydrogenase assembly factor 1, mitochondrial	SDHAF1
-0.831455647945404	-0.984333455562592	-0.875939667224884	-0.906420886516571	0.282510429620743	1.17107224464417	1.06543135643005	1.07913565635681	Discard	Keep	+	1%_21%	+_Discard	+_Keep	8	8	8	42636	0	10901	35919408	126813508	0,283245921134949	-3.5305	3,86320343134285	-1,79907483607531	-8,58766077792786	Q86UD0	Q86UD0	Suppressor APC domain-containing protein 2	SAPCD2
-0.769380807876587	-1.28114366531372	-0.649324595928192	-0.927678883075714	0.860484004020691	1.17650973796844	1.01321887969971	0.577315270900726	Discard	Keep	+	1%_21%	+_Discard	+_Keep	2	2	2	32461	0	33308	105252380	255341052	0,412203133106232	-2.42599	4,15904804329754	-1,81376396119595	-9,68897605099564	P18827;E9PHH3;H7C1K4	P18827;E9PHH3;H7C1K4	Syndecan-1	SDC1
-0.336743235588074	-1.68488144874573	0.0877644568681717	-0.917969346046448	0.211572363972664	0.370296895503998	1.60357677936554	0.666383504867554	Discard	Keep	+	1%_21%	+_Discard	+_Keep	3	3	3	50245	0	4795	45034628	69235206	0,650458455085754	-1.53738	1,55419263940925	-1,42591477930546	-2,88395598856954	P54274;P54274-2;E5RFJ5	P54274;P54274-2	Telomeric repeat-binding factor 1	TERF1
-1.19483804702759	-0.441390484571457	-1.04920315742493	-0.852693915367126	0.711216866970062	1.29433012008667	1.07782089710236	0.45475772023201	Discard	Keep	+	1%_21%	+_Discard	+_Keep	15	15	15	96631	0	94009	453950032	691390560	0,656575322151184	-1.52305	3,41324385782946	-1,76906280219555	-7,11989386375263	Q6P3X3;F8WCH1;H7C3A3;C9JVS4	Q6P3X3	Tetratricopeptide repeat protein 27	TTC27
-0.874791085720062	-1.10948264598846	-1.25687110424042	-0.0428480133414268	0.911995708942413	0.200188428163528	1.39577543735504	0.776033222675323	Discard	Keep	+	1%_21%	+_Discard	+_Keep	7	7	7	26534	0	60653	726001360	1117112176	0,649891138076782	-1.53872	2,38032659944694	-1,64199641160667	-4,48601659216021	O14530;O14530-2;B8ZZX4;F8WCJ3;F8WBV5;G3XAJ4	O14530;O14530-2;B8ZZX4;F8WCJ3;F8WBV5;G3XAJ4	Thioredoxin domain-containing protein 9	TXNDC9
-0.93837571144104	-1.16106450557709	-0.813600838184357	-0.743322789669037	1.16525161266327	0.748503684997559	1.11675655841827	0.625851929187775	Discard	Keep	+	1%_21%	+_Discard	+_Keep	21	21	3	70905	0	32331	4257957440	7405461376	0,574975311756134	-1.73921	4,53595876109892	-1,8281819075346	-11,2748100826284	Q16881;Q16881-3;E9PIR7;F8W809;A0A087WSW9;E9PNQ6;A0A087WSY9;Q16881-5;Q16881-2;Q16881-4;Q16881-6;E9PKD3;A0A0B4J225;E9PIZ5;E9PQI3;E9PLT3;E9PKI4;E9PRI8;E9PJU2	Q16881;Q16881-3;E9PIR7;F8W809;A0A087WSW9;E9PNQ6;A0A087WSY9;Q16881-5;Q16881-2;Q16881-4;Q16881-6;E9PKD3	Thioredoxin reductase 1, cytoplasmic	TXNRD1
-0.787380874156952	-1.06835663318634	-0.599775373935699	-1.05781698226929	0.677513778209686	1.41078877449036	1.09672486782074	0.328302472829819	Discard	Keep	+	1%_21%	+_Discard	+_Keep	9	9	9	38952	0	32331	490401416	1118568016	0,438418924808502	-2.28092	3,26566941013815	-1,75666493922472	-6,68647465879076	Q9H1E5;E9PIN7	Q9H1E5	Thioredoxin-related transmembrane protein 4	TMX4
-0.185943067073822	-1.0457808971405	-1.46476674079895	-0.188255608081818	0.117910519242287	0.493910104036331	1.78832185268402	0.484603732824326	Discard	Keep	+	1%_21%	+_Discard	+_Keep	13	13	13	65111	0	43842	151449106	253910960	0,596465408802032	-1.67654	1,60018480963694	-1,44237313047051	-2,96535296566672	Q5VV42;Q5VV42-2;Q5VV42-3	Q5VV42;Q5VV42-2	Threonylcarbamoyladenosine tRNA methylthiotransferase	CDKAL1
-1.10773360729218	-0.942035913467407	-0.677387893199921	-0.927805542945862	0.765249073505402	1.31003391742706	0.699485659599304	0.880194365978241	Discard	Keep	+	1%_21%	+_Discard	+_Keep	11	11	5	57002	0	56493	383087080	639247072	0,599278569221497	-1.66867	4,51485581416351	-1,82748149335384	-11,180115212888	Q9BV44;H7C0R6;C9J9V2	Q9BV44	THUMP domain-containing protein 3	THUMPD3
-0.673091769218445	-1.14045763015747	-0.82754123210907	-0.984417080879211	0.98591285943985	1.27751469612122	0.506822764873505	0.855257332324982	Discard	Keep	+	1%_21%	+_Discard	+_Keep	15	15	15	35716	0	32331	1368268416	3095821312	0,441972672939301	-2.26258	4,13636414337686	-1,81275384128094	-9,6003087449505	P04818;P04818-2;P04818-3	P04818;P04818-2	Thymidylate synthase	TYMS
-1.21371257305145	0.648437678813934	-1.32527852058411	-1.06660950183868	0.857059299945831	0.717121958732605	0.751813292503357	0.631168365478516	Discard	Keep	+	1%_21%	+_Discard	+_Keep	9	9	9	53688	0	19552	232713860	812674688	0,286355495452881	-3.49216	1,70839819314221	-1,47858145833015	-3,15977950363512	P04066	P04066	Tissue alpha-L-fucosidase	FUCA1
-1.4802393913269	-0.919436931610107	-0.717527210712433	-0.32069730758667	0.822435021400452	0.911281406879425	0.412274241447449	1.29191017150879	Discard	Keep	+	1%_21%	+_Discard	+_Keep	9	9	9	55859	0	22734	103582018	232550772	0,445416778326035	-2.24509	2,90050011591671	-1,71895042061806	-5,70239462446787	Q12933;Q12933-4;Q12933-3;Q12933-2;B1AMX7;B1AMX8	Q12933;Q12933-4;Q12933-3;Q12933-2	TNF receptor-associated factor 2	TRAF2
-1.32012665271759	-1.29754602909088	0.247816890478134	-0.317473322153091	1.18791544437408	-0.370802670717239	1.17379760742188	0.696418642997742	Discard	Keep	+	1%_21%	+_Discard	+_Keep	7	7	7	46198	15608	59465	52334932	410399392	0,127521947026253	-7.84179	1,3489227910756	-1,34366453438997	-2,52835050201508	Q9H497;Q9H497-2;Q5W0C6;Q5W0C9;Q9H497-3	Q9H497;Q9H497-2;Q5W0C6	Torsin-3A	TOR3A
-0.647888720035553	-0.259238362312317	-1.95228087902069	-0.114073619246483	0.158732742071152	0.971693754196167	0.819518983364105	1.02353608608246	Discard	Keep	+	1%_21%	+_Discard	+_Keep	7	7	7	42321	0	55173	511640032	842838208	0,607044160366058	-1.64733	1,73425486442583	-1,48674078658223	-3,20688255264832	Q9H4I3;J3KPT4;Q9H4I3-2	Q9H4I3;J3KPT4;Q9H4I3-2	TraB domain-containing protein	TRABD
-1.37094926834106	-1.12233376502991	-0.272418141365051	-0.594653844833374	0.199389681220055	1.11846089363098	0.853298306465149	1.18920612335205	Discard	Keep	+	1%_21%	+_Discard	+_Keep	6	6	6	46523	98439	30812	117567066	194081600	0,605760991573334	-1.65082	2,61124201326384	-1,68017750605941	-5,0019035530804	A5PLN9;A5PLN9-2;A5PLN9-4;A5PLN9-5;A5PLN9-7;D6RB83;H0YBF8	A5PLN9;A5PLN9-2;A5PLN9-4;A5PLN9-5;A5PLN9-7	Trafficking protein particle complex subunit 13	TRAPPC13
-0.722900450229645	-0.7674640417099	-1.43524813652039	0.0772897377610207	-0.386276125907898	0.886301934719086	0.918695092201233	1.42960202693939	Discard	Keep	+	1%_21%	+_Discard	+_Keep	6	5	5	72964	0	80793	19133091,75	55668157	0,343699038028717	-2.90952	1,5494010905164	-1,42416145466268	-2,87551568207336	Q99081;Q99081-3;B4DGI9;B4DZP2;F5GY10;Q99081-4;Q99081-2;H0YNP8;H3BRK2;H3BNF4;H0YNQ5	Q99081;Q99081-3;B4DGI9;B4DZP2;F5GY10;Q99081-4;Q99081-2;H0YNP8	Transcription factor 12	TCF12
-0.128998503088951	-1.13507282733917	-1.11925148963928	-0.456563413143158	-0.490473836660385	1.02198302745819	1.53133487701416	0.777042269706726	Discard	Keep	+	1%_21%	+_Discard	+_Keep	5	5	4	4507	0	10504	206520136	386998784	0,533645391464233	-1.8739	1,53795561001203	-1,41994314268231	-2,85538405380631	Q14186;Q5JSB5;Q5JSB6;F5H452;Q14186-2	Q14186;Q5JSB5;Q5JSB6	Transcription factor Dp-1	TFDP1
-0.601784765720367	-1.39655065536499	0.25684529542923	-1.16323852539063	-0.140401005744934	1.10531520843506	0.700153410434723	1.23966085910797	Discard	Keep	+	1%_21%	+_Discard	+_Keep	1	1	1	31844	29949	46515	25983559,5	45083163	0,576347291469574	-1.73506	1,6290386103277	-1,45236428081989	-3,01678346128288	O75461;Q2Z196;Q2Z197;F8WC40;F8WEZ5	O75461;Q2Z196;Q2Z197;F8WC40;F8WEZ5	Transcription factor E2F6	E2F6
-0.649190604686737	-0.623828589916229	-1.06365060806274	-1.05650246143341	0.218429088592529	1.15504097938538	0.499748289585114	1.51995396614075	Discard	Keep	+	1%_21%	+_Discard	+_Keep	13	13	11	52864	0	80559	301245392	457658960	0,658231139183044	-1.51922	2,72554050443904	-1,69658614695072	-5,27105607747243	P19484;B0QYS6;B0QYS7;B1AKB4;B1AKB5;P19484-2;B1AKB2;B1AKB1;O75030;O75030-9;O75030-11;O75030-10;O75030-12;O75030-4;O75030-3;O75030-8;O75030-7;O75030-2;O14948;B7Z757;C9JBI8;O14948-3;O14948-4;O14948-2	P19484;B0QYS6;B0QYS7;B1AKB4;B1AKB5;P19484-2	Transcription factor EB	TFEB
-0.729662418365479	-0.798252522945404	-0.80123233795166	-0.452996522188187	-0.484134882688522	1.61331820487976	1.45093417167664	0.202026352286339	Discard	Keep	+	1%_21%	+_Discard	+_Keep	9	9	9	52999	0	11748	327202408	689673928	0,474430590867996	-2.10779	1,46259296262166	-1,39107191190124	-2,72382539600428	P41212;H0YG25	P41212	Transcription factor ETV6	ETV6
-1.03349661827087	-0.826514899730682	-0.907719731330872	-0.884409725666046	0.653405487537384	1.25733304023743	1.11417210102081	0.62723034620285	Discard	Keep	+	1%_21%	+_Discard	+_Keep	2	2	2	41514	15584	58877	11713528	31369169	0,373408943414688	-2.67803	4,47336835828401	-1,82607048749924	-10,9960784640974	Q92664;B7ZBK4;Q92664-2;H7C326;H7BZH7	Q92664;B7ZBK4;Q92664-2;H7C326;H7BZH7	Transcription factor IIIA	GTF3A
-1.55664730072021	-0.141433894634247	-1.25310122966766	-0.204627111554146	0.587205111980438	0.631691753864288	1.37160110473633	0.565311551094055	Discard	Keep	+	1%_21%	+_Discard	+_Keep	20	20	20	12959	0	53299	123108640	195966352	0,628213167190552	-1.59182	2,07034279056548	-1,57790476456285	-3,84546738969261	Q9UNY4;Q9UNY4-2;X6RI15	Q9UNY4	Transcription termination factor 2	TTF2
-0.702688634395599	-1.22402238845825	-0.920079171657562	-0.809219419956207	0.608715653419495	1.00130772590637	0.880805909633636	1.16518032550812	Discard	Keep	+	1%_21%	+_Discard	+_Keep	12	12	12	34358	0	20091	345519128	794578848	0,43484565615654	-2.29967	4,53058959896461	-1,82800480723381	-11,2506473404122	Q96E29-3;Q96E29-2;Q96E29;E5RIK9;E5RIY4	Q96E29-3;Q96E29-2;Q96E29;E5RIK9;E5RIY4	Transcription termination factor 3, mitochondrial	MTERF3
-0.817880928516388	-1.43005537986755	0.572888970375061	-1.08547735214233	0.0253687053918839	0.629009902477264	1.3405853509903	0.765560746192932	Discard	Keep	+	1%_21%	+_Discard	+_Keep	8	8	8	12439	0	10488	34000082,5	54134913	0,628062069416046	-1.5922	1,43563135858524	-1,3802623488009	-2,67715698061808	Q12986;Q12986-2;Q12986-3	Q12986;Q12986-2;Q12986-3	Transcriptional repressor NF-X1	NFX1
-0.938947737216949	-1.13484942913055	-1.28413355350494	-0.153555676341057	0.848616778850555	0.667238295078278	1.02317154407501	0.972459852695465	Discard	Keep	+	1%_21%	+_Discard	+_Keep	17	17	17	87793	0	42875	59192484	192476804	0,307530492544174	-3.25171	3,25535610326817	-1,7557432167232	-6,6569949433565	O75410;O75410-7;O75410-2;E7EVI4;E7ET87;O75410-3;H0YAY0;R4GMT7;E5RFM9;O75410-5;O75410-4;O75410-6;B4E3H6;H0YBT8;O75410-8;E5RJU4	O75410;O75410-7;O75410-2;E7EVI4;E7ET87;O75410-3;H0YAY0;R4GMT7;E5RFM9;O75410-5;O75410-4;O75410-6	Transforming acidic coiled-coil-containing protein 1	TACC1
-1.42885279655457	-1.45549845695496	-0.381937026977539	0.0925773233175278	1.00200736522675	0.612546026706696	0.566576540470123	0.992581009864807	Discard	Keep	+	1%_21%	+_Discard	+_Keep	13	13	13	75775	0	20402	813221840	1285649696	0,632537662982941	-1.58093	2,10912857226349	-1,58685547485948	-3,9226688960691	Q99805	Q99805	Transmembrane 9 superfamily member 2	TM9SF2
-0.691604971885681	-0.909985065460205	-0.615337789058685	-1.40859222412109	0.893277764320374	1.08232128620148	0.838240444660187	0.811680555343628	Discard	Keep	+	1%_21%	+_Discard	+_Keep	2	2	2	18822	0	1081	90909064	362281280	0,250935018062592	-3.9851	4,13650236750488	-1,81276002526283	-9,60084683377683	D3DVS1;Q5BJH2	D3DVS1;Q5BJH2	Transmembrane protein 128	TMEM128
-0.184360653162003	-0.409747958183289	-0.802809834480286	-1.69738078117371	0.33061096072197	0.283740043640137	1.30173540115356	1.17821288108826	Discard	Keep	+	1%_21%	+_Discard	+_Keep	6	6	6	2313	15908	66187	22867945,25	126324405	0,181025549769402	-5.52408	1,94594430089011	-1,5471496284008	-3,60301425075667	Q8N511;J3KS81;J3KRW7	Q8N511;J3KS81;J3KRW7	Transmembrane protein 199	TMEM199
-1.65488421916962	-0.742614388465881	-0.597495377063751	-0.477209776639938	0.926552176475525	1.05358612537384	0.598587512969971	0.893477916717529	Discard	Keep	+	1%_21%	+_Discard	+_Keep	5	5	5	21198	0	54128	163348188	531884992	0,307111859321594	-3.25614	3,05355644491644	-1,73610187321901	-6,10035138125151	Q6UW68;K7ELQ9;K7EM09;K7EPR0;K7ER05;K7EJQ9;K7EMV9	Q6UW68;K7ELQ9;K7EM09;K7EPR0	Transmembrane protein 205	TMEM205
-1.13309276103973	-0.929416418075562	-0.733044505119324	-0.640204966068268	0.0147862946614623	1.14223980903625	1.18311548233032	1.09561705589294	Discard	Keep	+	1%_21%	+_Discard	+_Keep	2	2	2	11829	15427	55648	81590330	757207700	0,107751585543156	-9.28061	2,89153590237521	-1,71787932305597	-5,67969931160145	Q96GE9-2;Q96GE9	Q96GE9-2;Q96GE9	Transmembrane protein 261	TMEM261
-0.551283776760101	-0.391315221786499	-2.09497404098511	0.25159963965416	0.405303478240967	0.837850391864777	0.640396118164063	0.902423501014709	Discard	Keep	+	1%_21%	+_Discard	+_Keep	10	10	10	96619	0	96364	32758018	128442558	0,255040228366852	-3.92095	1,46743774248927	-1,39298672229052	-2,73223273785116	Q96RS0	Q96RS0	Trimethylguanosine synthase	TGS1
-0.993584632873535	-1.46156895160675	0.191495597362518	-0.994160354137421	0.827058374881744	0.656558632850647	0.601977348327637	1.17222392559052	Discard	Keep	+	1%_21%	+_Discard	+_Keep	15	15	15	194	0	17077	29695304,5	79393102	0,374028742313385	-2.67359	2,31024892249411	-1,62890915572643	-4,33629933622795	Q9UPQ9;Q9UPQ9-1;H0Y720;Q9UPQ9-2	Q9UPQ9;Q9UPQ9-1;H0Y720	Trinucleotide repeat-containing gene 6B protein	TNRC6B
0.206638112664223	0.176026821136475	-1.6689600944519	-1.47872257232666	0.67297101020813	0.552401840686798	0.843904376029968	0.695740461349487	Discard	Keep	+	1%_21%	+_Discard	+_Keep	11	11	11	62165	0	5411	81301137,5	284494276	0,285774230957031	-3.49927	1,44118123429725	-1,38250885531306	-2,68674710527698	Q12899;A2AE48;A0A0G2JIW2;Q5SPU2;A2AE50	Q12899	Tripartite motif-containing protein 26	TRIM26
-0.831373929977417	0.110180273652077	-1.5802788734436	-0.786810457706451	1.19592308998108	1.0696861743927	0.777034163475037	0.0456396676599979	Discard	Keep	+	1%_21%	+_Discard	+_Keep	14	14	14	58246	0	18604	267310352	485737224	0,550318837165833	-1.81713	1,93444939548406	-1,54414152074605	-3,58099101280356	Q32P41;G3V494;G3V5X1	Q32P41	tRNA (guanine(37)-N1)-methyltransferase	TRMT5
-1.20442283153534	-1.32954359054565	-0.202753946185112	-0.676161050796509	0.357145547866821	0.871495246887207	1.16582977771759	1.01841080188751	Discard	Keep	+	1%_21%	+_Discard	+_Keep	5	5	5	52725	0	18137	43414912	99847292	0,43481308221817	-2.29984	2,79962111747821	-1,70644069835544	-5,45074613778757	Q9H3H1;Q9H3H1-5;Q9H3H1-4;S4R2Z0;Q9H3H1-3;Q9H3H1-2;S4R2X1;B4DK89;S4R3U8;Q9H3H1-6;S4R3F4;S4R3C5	Q9H3H1;Q9H3H1-5;Q9H3H1-4;S4R2Z0;Q9H3H1-3;Q9H3H1-2	tRNA dimethylallyltransferase, mitochondrial	TRIT1
-1.55389964580536	-0.610279083251953	-0.296850264072418	-0.910794377326965	0.5590900182724	1.26949715614319	0.471372127532959	1.0718640089035	Discard	Keep	+	1%_21%	+_Discard	+_Keep	7	7	7	75601	0	38045	85839304	183480824	0,467837989330292	-2.13749	2,64999535177631	-1,68591167032719	-5,09208823451508	O60294;H3BU01	O60294	tRNA wybutosine-synthesizing protein 4	LCMT2
-1.65103578567505	-1.40118718147278	0.0198847912251949	0.196294054389	0.282502114772797	0.857592642307281	0.943979859352112	0.751969456672668	Discard	Keep	+	1%_21%	+_Discard	+_Keep	10	10	10	5505	0	17454	20490555	64358968	0,318379193544388	-3.14091	1,53278129058371	-1,41802204865962	-2,84629641737768	Q9NX74;E7EUN9;J3QLD5;I3L4Y9;H3BQX4;H3BM64;I3L4H0;I3L0K0;H3BMK6;I3L1K5;H3BRI6;H3BSF3;H3BTR3	Q9NX74;E7EUN9;J3QLD5;I3L4Y9	tRNA-dihydrouridine(20) synthase [NAD(P)+]-like	DUS2
-1.66271185874939	0.213376894593239	0.243620097637177	-1.50740432739258	0.608863055706024	0.716746747493744	0.618889570236206	0.76861983537674	Discard	Keep	+	1%_21%	+_Discard	+_Keep	15	15	15	72593	0	17183	135037463,5	442221280	0,305361717939377	-3.2748	1,37870417836864	-1,35655960068107	-2,57925150227404	Q96G46;Q96G46-3;Q96G46-2;K7EM42;K7EMI3;K7ER20;K7EQU9;K7EJX8;K7EPA4	Q96G46;Q96G46-3;Q96G46-2	tRNA-dihydrouridine(47) synthase [NAD(P)(+)]-like	DUS3L
-1.01823341846466	-0.584913492202759	-0.67666494846344	-0.792547345161438	0.421734094619751	2.00792121887207	0.0774988979101181	0.565204858779907	Discard	Keep	+	1%_21%	+_Discard	+_Keep	3	3	3	55392	99249	15318	10388006,75	22632607,75	0,458984076976776	-2.17872	1,90455374919398	-1,53617956861854	-3,52400241169345	Q9BUB4;Q9BUB4-2	Q9BUB4;Q9BUB4-2	tRNA-specific adenosine deaminase 1	ADAT1
-0.731623888015747	-1.35405921936035	-0.8835728764534	0.179205760359764	-0.29683455824852	1.57259750366211	0.521848559379578	0.992438673973083	Discard	Keep	+	1%_21%	+_Discard	+_Keep	3	3	3	31274	44326	42578	91574769	176126116	0,51993864774704	-1.9233	1,47261809117982	-1,395025100559	-2,74122976579797	Q6ZTW0;Q6ZTW0-2	Q6ZTW0;Q6ZTW0-2	Tubulin polyglutamylase complex subunit 1	TPGS1
-1.470299243927	-1.13830327987671	-0.557588994503021	-0.270278722047806	0.480595797300339	1.05095052719116	1.01838982105255	0.886534154415131	Discard	Keep	+	1%_21%	+_Discard	+_Keep	7	7	7	26624	0	25629	77180323	237316904	0,325220495462418	-3.07484	2,89450646889326	-1,71823513507843	-5,68721278009104	P41273	P41273	Tumor necrosis factor ligand superfamily member 9	TNFSF9
-0.764287412166595	0.349804818630219	-1.58229541778564	-1.09661149978638	0.506906092166901	0.712344288825989	1.11968779563904	0.754451394081116	Discard	Keep	+	1%_21%	+_Discard	+_Keep	3	3	3	30619	0	12845	110818222	325682508	0,340264588594437	-2.93889	1,94419894393304	-1,54669477045536	-3,59966628532486	P25942	P25942	Tumor necrosis factor receptor superfamily member 5	CD40
-0.946580827236176	-0.94892293214798	-0.917117655277252	-0.914691865444183	0.736518621444702	0.96789139509201	0.996929943561554	1.02597332000732	Discard	Keep	+	1%_21%	+_Discard	+_Keep	9	9	1	24327	0	32331	1168112448	8709539840	0,134118720889091	-7.45608	6,85248119755387	-1,8636566400528	-27,8935901656249	P55327;P55327-2;P55327-4;P55327-7;P55327-5;P55327-6;P55327-3;E5RFR7;H0YC44;P55327-8;E5RK35	P55327;P55327-2;P55327-4;P55327-7;P55327-5;P55327-6;P55327-3;E5RFR7;H0YC44;P55327-8	Tumor protein D52	TPD52
-1.04977428913116	-1.16455817222595	-0.247495055198669	-1.0323166847229	0.361178338527679	1.09288895130157	1.08724570274353	0.952831149101257	Discard	Keep	+	1%_21%	+_Discard	+_Keep	11	11	11	77153	0	22779	47507297	202804154	0,234252080321312	-4.26891	3,16225680088763	-1,74707208573818	-6,39549219694028	Q96RR1;Q96RR1-2;Q96RR1-3	Q96RR1;Q96RR1-2;Q96RR1-3	Twinkle protein, mitochondrial	PEO1
-1.08169209957123	-1.17893171310425	0.127035021781921	-0.887787222862244	-0.0862621739506721	0.601384460926056	1.00212919712067	1.50412464141846	Discard	Keep	+	1%_21%	+_Discard	+_Keep	7	7	7	1251	29762	44686	19577476,25	48277980,5	0,405515640974045	-2.466	1,81365102454141	-1,51068803481758	-3,35319303812447	P52333;P52333-2;P52333-4	P52333;P52333-2	Tyrosine-protein kinase JAK3	JAK3
-0.172187849879265	-1.00550425052643	-1.94189023971558	0.252315789461136	0.533309519290924	0.899294674396515	0.752215266227722	0.682447075843811	Discard	Keep	+	1%_21%	+_Discard	+_Keep	10	10	10	14962	0	17939	29442824,75	86928426	0,338701903820038	-2.95245	1,57553002078533	-1,43363327160478	-2,92163192314798	Q86YV5	Q86YV5	Tyrosine-protein kinase SgK223	SGK223
-1.57956326007843	-1.57911336421967	0.373851984739304	0.111598618328571	0.456271469593048	0.684864223003387	0.701669633388519	0.830420672893524	Discard	Keep	+	1%_21%	+_Discard	+_Keep	5	5	5	2185	0	42479	818336140	2689570912	0,304262727499008	-3.28663	1,33297216172816	-1,33661300502717	-2,5011722248364	Q9NV31	Q9NV31	U3 small nucleolar ribonucleoprotein protein IMP3	IMP3
-1.64119136333466	-1.17481029033661	-0.0623982921242714	-0.296934574842453	0.495205879211426	0.711775541305542	1.25360906124115	0.714744091033936	Discard	Keep	+	1%_21%	+_Discard	+_Keep	11	11	11	5184	0	32331	694695288	1126957632	0,616434276103973	-1.62223	2,11270920163829	-1,58766727335751	-3,92983604670394	O43818	O43818	U3 small nucleolar RNA-interacting protein 2	RRP9
-1.35489618778229	-1.31469786167145	-0.566234469413757	0.0323322452604771	0.539888322353363	1.00895392894745	1.29409861564636	0.360555320978165	Discard	Keep	+	1%_21%	+_Discard	+_Keep	23	22	2	11242	0	13314	285856340	460529128	0,620712876319885	-1.61105	2,17658008246409	-1,60174811538309	-4,05884778449678	Q9Y4E8;Q9Y4E8-4	Q9Y4E8	Ubiquitin carboxyl-terminal hydrolase 15	USP15
-0.268552929162979	-2.08196973800659	-0.504669308662415	0.12559612095356	0.130715444684029	0.964094698429108	0.675992488861084	0.958793342113495	Discard	Keep	+	1%_21%	+_Discard	+_Keep	5	5	5	93569	0	10199	28437199,5	85239433	0,33361554145813	-2.99746	1,39816055953893	-1,36479795724154	-2,61262063303312	Q9Y5T5;Q9Y5T5-2;Q9Y5T5-4;Q9Y5T5-3;H9KVB6;Q9Y5T5-5	Q9Y5T5;Q9Y5T5-2;Q9Y5T5-4;Q9Y5T5-3	Ubiquitin carboxyl-terminal hydrolase 16	USP16
-0.209544628858566	-1.43984019756317	-1.1027364730835	-0.213759660720825	-0.0619202218949795	0.923294246196747	0.527634978294373	1.57687199115753	Discard	Keep	+	1%_21%	+_Discard	+_Keep	7	7	7	14539	0	14242	51870909	79001370	0,656582415103912	-1.52304	1,72213986040111	-1,48294048849493	-3,18478029112312	Q9H9J4;Q9H9J4-2;C9JPC9;B4DP25;E5RJP3;E7EWZ4	Q9H9J4;Q9H9J4-2;C9JPC9	Ubiquitin carboxyl-terminal hydrolase 42	USP42
-0.443849056959152	-1.2001131772995	-1.55600488185883	-0.121809430420399	0.534111559391022	0.896795392036438	0.788070976734161	1.10279858112335	Discard	Keep	+	1%_21%	+_Discard	+_Keep	11	11	8	345	0	12397	2331211936	3595788352	0,648317396640778	-1.54245	2,48916096262777	-1,66088826395571	-4,72470880016787	Q92890;Q92890-1;Q92890-3;C9JNP9;C9IZG3	Q92890;Q92890-1;Q92890-3	Ubiquitin fusion degradation protein 1 homolog	UFD1L
-1.31600058078766	-1.47493314743042	0.196908816695213	-0.527227997779846	0.946156740188599	0.282053887844086	0.877961575984955	1.01508069038391	Discard	Keep	+	1%_21%	+_Discard	+_Keep	11	11	11	38963	0	15164	154203642	281102776	0,54856675863266	-1.82293	1,99885985978517	-1,56062645092607	-3,70521106023238	Q8NBM4;Q8NBM4-2;X6R5E5;Q8NBM4-3;Q8NBM4-4;Q5JUH4;Q8NBM4-5;A0A087WXT1	Q8NBM4;Q8NBM4-2;X6R5E5;Q8NBM4-3;Q8NBM4-4	Ubiquitin-associated domain-containing protein 2	UBAC2
-0.892278909683228	-0.693215072154999	-1.37783670425415	-0.5687535405159	0.498245656490326	1.21581900119781	1.15630972385406	0.661709845066071	Discard	Keep	+	1%_21%	+_Discard	+_Keep	12	12	12	11711	0	17311	318344464	512535920	0,62111634016037	-1.61	3,37566987850712	-1,76604211330414	-7,00744826587258	Q5T6F2;F5H2U4;A2A305;Q5T6F2-2;A0A0D9SFI5;Q5JV08	Q5T6F2;F5H2U4;A2A305	Ubiquitin-associated protein 2	UBAP2
-0.607370376586914	-0.113639630377293	-2.03350901603699	-0.0209573414176702	0.608675897121429	0.136799111962318	1.14332783222198	0.886673510074615	Discard	Keep	+	1%_21%	+_Discard	+_Keep	8	8	6	19652	0	43819	847019668	2287355296	0,370305210351944	-2.70048	1,4542083067647	-1,3877381789498	-2,70929073149192	O00762;O00762-2;O00762-3;O00762-4;A0A0A0MSE8;A0A087WVK1	O00762;O00762-2;O00762-3;O00762-4;A0A0A0MSE8	Ubiquitin-conjugating enzyme E2 C	UBE2C
-0.310125142335892	-0.556797087192535	-2.02124524116516	-0.23533122241497	0.703905582427979	0.860353529453278	0.808616638183594	0.750622749328613	Discard	Keep	+	1%_21%	+_Discard	+_Keep	6	5	5	26736	15926	66463	110432939	273719104	0,403453528881073	-2.4786	2,0033769204747	-1,56174929812551	-3,71399807872783	P49427;U3KQ77;U3KPV8;U3KQP9	P49427;U3KQ77;U3KPV8	Ubiquitin-conjugating enzyme E2 R1	CDC34
-0.62588632106781	-1.66900408267975	-0.268654078245163	-0.836942076683044	0.74182915687561	0.926372826099396	0.600470900535583	1.13181364536285	Discard	Keep	+	1%_21%	+_Discard	+_Keep	6	6	5	27166	16534	81519	498435496	1085268432	0,459273904561996	-2.17735	2,75251955409618	-1,7002432718873	-5,33600771287665	Q712K3	Q712K3	Ubiquitin-conjugating enzyme E2 R2	UBE2R2
-0.985104143619537	-0.980339527130127	-1.14881229400635	-0.568955183029175	1.03865504264832	0.828462064266205	0.834657907485962	0.981436133384705	Discard	Keep	+	1%_21%	+_Discard	+_Keep	11	11	11	23845	0	21823	1332942624	3880241856	0,343520492315292	-2.91103	5,02608508906058	-1,84160557389259	-13,6955578703278	Q16763;K7EPJ1;K7EM75	Q16763;K7EPJ1	Ubiquitin-conjugating enzyme E2 S	UBE2S
-1.56311547756195	-0.998427212238312	-0.296810984611511	-0.3040831387043	1.56759738922119	0.569607317447662	0.702201187610626	0.323030978441238	Discard	Keep	+	1%_21%	+_Discard	+_Keep	8	8	8	22521	0	93832	524521840	940707792	0,557582139968872	-1.79346	2,08455572403568	-1,5812184214592	-3,87366602087214	Q9NPD8	Q9NPD8	Ubiquitin-conjugating enzyme E2 T	UBE2T
-0.378159821033478	-1.12079274654388	-1.10829555988312	-0.809108912944794	0.0974021106958389	1.02407383918762	1.03257548809052	1.26230573654175	Discard	Keep	+	1%_21%	+_Discard	+_Keep	6	6	6	41036	0	12132	56704854	124752116	0,454540252685547	-2.20003	2,81315615524186	-1,70817855373025	-5,48403747842509	Q9BUA3;H0YGK9;H0YGY5	Q9BUA3	Uncharacterized protein C11orf84	C11orf84
-0.060183260589838	-1.03183579444885	-0.24980628490448	-1.77869737148285	0.847913563251495	0.349653363227844	0.873640358448029	1.04931545257568	Discard	Keep	+	1%_21%	+_Discard	+_Keep	6	6	6	2817	0	54464	159630360	286012176	0,558124423027039	-1.79172	1,99739487290796	-1,56026136223227	-3,70236338765277	Q96C57;F5H7W8;F5H3K2;E7ENF1;G5EA44;F5H8B7	Q96C57;F5H7W8;F5H3K2;E7ENF1;G5EA44;F5H8B7	Uncharacterized protein C12orf43	C12orf43
-0.688922464847565	-1.22461652755737	-0.790503561496735	-0.916630864143372	0.614982545375824	1.10079443454742	0.672872543334961	1.23202395439148	Discard	Keep	+	1%_21%	+_Discard	+_Keep	7	7	7	47031	0	1092	26709269,5	65153784	0,409941971302032	-2.43937	4,08366023361295	-1,81033672392368	-9,39708916357798	Q86SX3-6;Q86SX3;Q86SX3-2;Q86SX3-4;Q86SX3-5;Q86SX3-3;C9IYA4;F8VP51;C9K0G6;C9J317;C9J6B2;C9J1F2	Q86SX3-6;Q86SX3;Q86SX3-2;Q86SX3-4;Q86SX3-5;Q86SX3-3	Uncharacterized protein C14orf80	C14orf80
0.11337623745203	-0.300496220588684	-0.434594959020615	-2.16720056533813	0.539022982120514	0.610433459281921	0.865165412425995	0.774293661117554	Discard	Keep	+	1%_21%	+_Discard	+_Keep	3	3	3	23373	15374	29678	95216192,5	469998120	0,202588453888893	-4.93612	1,47117378004466	-1,39445775561035	-2,73872057426268	Q9NX04;V9GYI2;V9GY35;V9GYN4;V9GYQ8;V9GYT8;Q9NX04-2;A0A087WUX7	Q9NX04;V9GYI2;V9GY35;V9GYN4;V9GYQ8;V9GYT8;Q9NX04-2	Uncharacterized protein C1orf109	C1orf109
-0.228443309664726	-0.360860764980316	-2.21932315826416	0.156333103775978	0.598723888397217	0.786439716815948	0.423814326524734	0.843316078186035	Discard	Keep	+	1%_21%	+_Discard	+_Keep	7	7	7	22083	0	1232	3160779648	4948288000	0,638762295246124	-1.56553	1,30971834700251	-1,32614703476429	-2,46164957289682	Q9BRJ6;C9JQV0;H7C0T1;H7C2R9	Q9BRJ6;C9JQV0	Uncharacterized protein C7orf50	C7orf50
-0.555116832256317	-0.96976912021637	-1.71418631076813	0.289280414581299	0.344300270080566	0.433259129524231	0.907619059085846	1.26461338996887	Discard	Keep	+	1%_21%	+_Discard	+_Keep	5	5	5	21063	0	16358	116384032	211507924	0,55025851726532	-1.81733	1,69690579460332	-1,47489592432976	-3,13892660664804	Q8IXQ3	Q8IXQ3	Uncharacterized protein C9orf40	C9orf40
-0.876556396484375	-1.01751828193665	-0.46171247959137	-0.936570882797241	-0.198237344622612	1.13465094566345	1.22266042232513	1.13328409194946	Discard	Keep	+	1%_21%	+_Discard	+_Keep	36	1	1	11899	1	-2	11760486,5	21864053,75	0,537891387939453	-1.85911	2,40360096131475	-1,64617903903127	-4,53641870094436	F5H6E2;O00159;O00159-2;I3L204;I3L501;I3L3Y6;I3L4D4;I3L168;I3L3F5	F5H6E2;O00159;O00159-2	Unconventional myosin-Ic	MYO1C
-1.16341400146484	-0.735376715660095	-1.00075733661652	-0.732707917690277	0.584137260913849	1.30033993721008	0.811250865459442	0.936527967453003	Discard	Keep	+	1%_21%	+_Discard	+_Keep	27	27	27	17054	0	16572	125923272	266488744	0,47252756357193	-2.11628	4,21375602726542	-1,81612800061703	-9,90584669363446	Q14146;Q5VYD0	Q14146	Unhealthy ribosome biogenesis protein 2 homolog	URB2
-0.73371958732605	-0.714593350887299	-0.770966291427612	-0.991588592529297	0.715481042861938	-0.17730887234211	0.976922988891602	1.69577264785767	Discard	Keep	+	1%_21%	+_Discard	+_Keep	2	2	2	4645	71041	17053	16968120,75	34213075	0,495954245328903	-2.01632	2,19387453185551	-1,60543390735984	-4,09416719590182	Q9BPX7;Q9BPX7-2	Q9BPX7;Q9BPX7-2	UPF0415 protein C7orf25	C7orf25
-0.889171183109283	-0.804952323436737	-1.32632327079773	-0.368109077215195	0.333835452795029	1.21291923522949	0.480415791273117	1.36138534545898	Discard	Keep	+	1%_21%	+_Discard	+_Keep	5	5	5	37318	0	47319	361117640	629376120	0,573770761489868	-1.74286	2,70880976332123	-1,69427791982889	-5,23105416416102	Q9H6V9;Q9H6V9-2;B5MDU6;B5MCU4;A0A0A0MSH6;Q9H6V9-4;Q9H6V9-3;C9JHU6;C9JUM0;B5MCE2;B4DRG3	Q9H6V9;Q9H6V9-2;B5MDU6;B5MCU4;A0A0A0MSH6;Q9H6V9-4;Q9H6V9-3;C9JHU6;C9JUM0	UPF0554 protein C2orf43	C2orf43;LDAH
-0.516775548458099	-0.25763526558876	-1.85893857479095	-0.616245269775391	1.01906383037567	0.461736440658569	0.797369122505188	0.971425294876099	Discard	Keep	+	1%_21%	+_Discard	+_Keep	12	12	12	11138	0	27225	31974987,75	81395036	0,392837047576904	-2.54558	2,28904038238428	-1,62479733675718	-4,29157898374013	Q6UXG2;Q6UXG2-3;E9PB18;Q6UXG2-2;Q6UXG2-4;H0YDD2;E9PS21;E9PLY8;E9PLQ2	Q6UXG2;Q6UXG2-3;E9PB18;Q6UXG2-2;Q6UXG2-4	UPF0577 protein KIAA1324	KIAA1324
-0.683386027812958	-1.09970211982727	-0.109191231429577	-1.51080965995789	0.718948245048523	0.671040415763855	0.872943222522736	1.1401572227478	Discard	Keep	+	1%_21%	+_Discard	+_Keep	36	35	29	53651	0	32331	196835514	618168640	0,318417191505432	-3.14053	2,76226233492118	-1,70154453627765	-5,35960007035851	P08670;B0YJC4;B0YJC5;Q5JVS8;P07196;Q16352;A0A087WYG8	P08670;B0YJC4	Vimentin	VIM
-0.246933862566948	-0.969155430793762	-1.72888839244843	-0.210384607315063	1.34093761444092	0.606815934181213	0.415461808443069	0.792146921157837	Discard	Keep	+	1%_21%	+_Discard	+_Keep	7	7	7	40329	0	48706	615404856	948244320	0,648993968963623	-1.54085	2,06938995683331	-1,57768114283681	-3,843580712932	P61421;F5GYQ1;R4GN72;J3QL14;H3BQJ1;H3BQB4;H3BSG7	P61421;F5GYQ1;R4GN72;J3QL14	V-type proton ATPase subunit d 1	ATP6V0D1
-1.18988168239594	-1.42557990550995	-0.710174441337585	-0.0383644066751003	0.50862193107605	1.15462899208069	0.913403391838074	0.787346065044403	Discard	Keep	+	1%_21%	+_Discard	+_Keep	12	12	12	42441	0	12457	506328672	877020608	0,577328145503998	-1.73212	2,62342903492628	-1,68200020398945	-5,03014798395057	Q6RFH5;Q6RFH5-2;E9PS41;F5GYL6;H0YFP2;F5H0Q8	Q6RFH5;Q6RFH5-2;E9PS41	WD repeat-containing protein 74	WDR74
-1.69323909282684	0.31211069226265	-0.159452944993973	-1.36533331871033	0.603117704391479	0.864698946475983	0.73404461145401	0.704053401947021	Discard	Keep	+	1%_21%	+_Discard	+_Keep	5	5	5	43806	0	55647	39200473,5	156599282	0,250323444604874	-3.99483	1,63077444742936	-1,45295733213425	-3,01988676000125	Q8NBI6;Q8NBI6-2;H7C2F4;Q8NBI6-3	Q8NBI6;Q8NBI6-2	Xyloside xylosyltransferase 1	XXYLT1
-1.02873539924622	-1.62227523326874	0.721591055393219	-0.8438321352005	0.631395518779755	0.507223725318909	0.610879302024841	1.02375316619873	Discard	Keep	+	1%_21%	+_Discard	+_Keep	6	6	6	11887	71715	35088	13724754,25	34920150,5	0,393032491207123	-2.54432	1,45142450226687	-1,38662585616112	-2,70446937739921	Q9ULJ3;Q9ULJ3-2	Q9ULJ3;Q9ULJ3-2	Zinc finger and BTB domain-containing protein 21	ZBTB21
-1.1479731798172	-1.20344209671021	0.633182108402252	-1.25865030288696	0.818460464477539	0.800764143466949	0.589261949062347	0.768396973609924	Discard	Keep	+	1%_21%	+_Discard	+_Keep	2	2	1	54007	57921	37298	17006821	37552210	0,452884674072266	-2.20807	1,73971883957855	-1,48844175040722	-3,21686974786082	Q96K62	Q96K62	Zinc finger and BTB domain-containing protein 45	ZBTB45
-1.52116107940674	-0.637802004814148	0.0369536131620407	-1.15647602081299	0.41146919131279	0.862180113792419	1.09762668609619	0.907209575176239	Discard	Keep	+	1%_21%	+_Discard	+_Keep	5	5	5	50602	65155	17949	65939961	234078380	0,2817003428936	-3.54987	2,36524323493294	-1,63924276456237	-4,45353496829883	Q96C00;A0A087X1K1;A0A087X1Z5	Q96C00	Zinc finger and BTB domain-containing protein 9	ZBTB9
-0.346000522375107	-1.43633663654327	-1.47609579563141	0.272099077701569	0.307051241397858	0.937370598316193	0.67827570438385	1.063636302948	Discard	Keep	+	1%_21%	+_Discard	+_Keep	11	11	11	11158	0	33411	65687049	123290148	0,532784283161163	-1.87693	1,75503358383253	-1,49316693097353	-3,24492565130508	Q9UGR2;Q9UGR2-2	Q9UGR2;Q9UGR2-2	Zinc finger CCCH domain-containing protein 7B	ZC3H7B
-0.66491973400116	-1.0213531255722	-1.29042172431946	-0.678333580493927	0.835477888584137	0.868729114532471	1.10546672344208	0.845354437828064	Discard	Keep	+	1%_21%	+_Discard	+_Keep	14	14	14	12593	0	1339	40747420	130650704	0,311880588531494	-3.20636	4,51583270589429	-1,82751408219337	-11,1844825887085	Q9C0B9;K7ESN2;Q9C0B9-2;A0A087WXC7;K7EKB8;K7ERQ9	Q9C0B9;K7ESN2;Q9C0B9-2	Zinc finger CCHC domain-containing protein 2	ZCCHC2
-1.54108607769012	-1.06298243999481	0.0151670100167394	-0.492696583271027	0.760813593864441	0.769372165203094	1.43825089931488	0.113161392509937	Discard	Keep	+	1%_21%	+_Discard	+_Keep	9	5	5	12407	15321	52819	7339637,5	16223201,25	0,452416121959686	-2.21035	1,92180655063195	-1,54079903545789	-3,55683998259713	P37275;P37275-3;P37275-4;P37275-5;P37275-2;H0YMD3;H0YMN2;H0YND9;Q5SVQ8;Q5SVQ8-2	P37275;P37275-3;P37275-4;P37275-5;P37275-2	Zinc finger E-box-binding homeobox 1	ZEB1
-0.471759617328644	-1.04400599002838	-1.44025182723999	-0.17375460267067	0.917891025543213	0.946969449520111	-0.0899370759725571	1.35484862327576	Discard	Keep	+	1%_21%	+_Discard	+_Keep	7	7	7	42883	0	32331	352686168	542062768	0,650637149810791	-1.53695	2,01608769106152	-1,56488601490855	-3,73877850535371	Q9UHR6;E9PQB8	Q9UHR6	Zinc finger HIT domain-containing protein 2	ZNHIT2
-0.343149751424789	-0.672180235385895	-0.00373516138643026	-1.79142665863037	-0.127453193068504	0.922753036022186	0.605736911296844	1.40945506095886	Discard	Keep	+	1%_21%	+_Discard	+_Keep	2	2	2	40994	0	15078	6677704,75	29296160,5	0,227937892079353	-4.38716	1,49896067838613	-1,40524590550922	-2,78710047610684	Q96IQ9-2;Q96IQ9;M0R0Q5;M0R398	Q96IQ9-2;Q96IQ9;M0R0Q5;M0R398	Zinc finger protein 414	ZNF414
-0.633781671524048	-0.40492370724678	-0.878315210342407	-1.36059701442719	0.101340420544147	0.570994198322296	1.50468373298645	1.10059916973114	Discard	Keep	+	1%_21%	+_Discard	+_Keep	1	1	1	2048	0	1585	203691732	532449128	0,382556229829788	-2.61399	2,36288268012461	-1,63880878128111	-4,44846445463445	Q96B54;M0QXZ5	Q96B54;M0QXZ5	Zinc finger protein 428	ZNF428
0.239063143730164	-0.92618727684021	-1.38771200180054	-0.845359563827515	0.686941266059875	0.739708423614502	-0.0626255720853806	1.55617153644562	Discard	Keep	+	1%_21%	+_Discard	+_Keep	3	3	3	67819	15333	53293	68532956	144439942	0,474473774433136	-2.1076	1,65188335850909	-1,46009783819318	-3,05771062330609	Q96MX3;A0A087WVT1	Q96MX3;A0A087WVT1	Zinc finger protein 48	ZNF48
-0.107078552246094	-0.553003311157227	-1.83593928813934	-0.222859680652618	0.81385463476181	0.783399403095245	-0.262984126806259	1.38461089134216	Discard	Keep	+	1%_21%	+_Discard	+_Keep	8	8	8	98899	0	9229	41183233	67245936	0,612427055835724	-1.63285	1,38546883244346	-1,35944040864706	-2,59084281003797	Q6ZN55;A0A0C4DFM2;Q6ZN55-2;A0A087WUK5;M0R133	Q6ZN55;A0A0C4DFM2;Q6ZN55-2;A0A087WUK5	Zinc finger protein 574	ZNF574
-0.693542420864105	-0.919564485549927	-0.0908572375774384	-1.58707010746002	0.280915111303329	1.06982672214508	0.827767193317413	1.11252522468567	Discard	Keep	+	1%_21%	+_Discard	+_Keep	3	3	3	2201	15396	55274	47678114	317896716	0,149979889392853	-6.66756	2,39988820570136	-1,64551712572575	-4,52835545001799	Q9P0T4;K7EM32	Q9P0T4	Zinc finger protein 581	ZNF581
-0.810017108917236	-0.915804266929626	-1.31661880016327	-0.630351185798645	0.884123980998993	0.912244558334351	0.937776744365692	0.938646078109741	Discard	Keep	+	1%_21%	+_Discard	+_Keep	5	5	5	15199	0	22714	308471204	3071353024	0,100434951484203	-9.95669	4,81325191725355	-1,83639568090439	-12,590124943015	O00488;A9J4F5	O00488;A9J4F5	Zinc finger protein 593	ZNF593
0.148822620511055	-1.6070704460144	-0.33323723077774	-0.889955699443817	0.0130585012957454	1.16437661647797	0.0430781319737434	1.46092748641968	Discard	Keep	+	1%_21%	+_Discard	+_Keep	2	1	1	53489	1	-2	17341692,25	27813507	0,623498916625977	-1.60385	1,34223484178649	-1,34072037297301	-2,51694797360494	Q8N9Z0;Q8N9Z0-2	Q8N9Z0;Q8N9Z0-2	Zinc finger protein 610	ZNF610
-0.894312798976898	0.0149928545579314	-1.25569427013397	-1.19796538352966	1.04907619953156	0.423078835010529	0.632754266262054	1.22807013988495	Discard	Keep	+	1%_21%	+_Discard	+_Keep	4	4	4	96619	16072	69833	10016563,75	23744386,5	0,42184978723526	-2.37051	2,5233813544284	-1,66648975969292	-4,80137485358074	Q9UEG4	Q9UEG4	Zinc finger protein 629	ZNF629
-0.752910435199738	-1.06284523010254	-1.36686396598816	0.131037384271622	0.534769415855408	0.262057214975357	0.616797804832458	1.63795793056488	Discard	Keep	+	1%_21%	+_Discard	+_Keep	12	12	12	14956	0	2694	46658427	72710673	0,641699850559235	-1.55836	1,86665439945251	-1,52579115331173	-3,4523440445026	Q9H582;Q9H582-2;A0A087WZL9;Q9H582-3	Q9H582;Q9H582-2	Zinc finger protein 644	ZNF644
-0.517829596996307	-1.02609753608704	-1.4802565574646	-0.514856576919556	0.832969546318054	0.659869730472565	1.02176547050476	1.02443563938141	Discard	Keep	+	1%_21%	+_Discard	+_Keep	16	16	16	50925	0	32331	848834832	1585503904	0,535372257232666	-1.86786	3,41903178912216	-1,76952016353607	-7,13734502937311	O75312;H7C0E5;H7BZM7;F8WBC5;H7C449	O75312;H7C0E5;H7BZM7	Zinc finger protein ZPR1	ZPR1
-0.32107076048851	0.103947706520557	-2.05331182479858	-0.49175152182579	0.119097851216793	0.733167350292206	1.11710464954376	0.792816579341888	Discard	Keep	+	1%_21%	+_Discard	+_Keep	5	5	5	98096	0	10434	5740831,5	31127462	0,184429794549942	-5.42212	1,43768068077391	-1,38109320774674	-2,68069721819353	Q9UKY1	Q9UKY1	Zinc fingers and homeoboxes protein 1	ZHX1
-0.818893909454346	-1.1258190870285	-1.17358839511871	-0.509554147720337	0.757253646850586	0.692666828632355	1.09479260444641	1.08314251899719	Discard	Keep	+	1%_21%	+_Discard	+_Keep	26	26	26	92218	0	32331	1102957008	2112846688	0,522024154663086	-1.91562	4,16276430330974	-1,81392778456211	-9,70357189990742	Q9BQ52;G5E9D5;Q9BQ52-4;E7ES68;Q9BQ52-2;Q9BQ52-3;V9GYS7;H7C2I4;J3QRS2;V9GYU5;J3QL08;V9GZ72;J3QLK4;J3QQT1	Q9BQ52;G5E9D5;Q9BQ52-4;E7ES68;Q9BQ52-2	Zinc phosphodiesterase ELAC protein 2	ELAC2
-1.84568607807159	0.347483932971954	-0.745340347290039	-0.498902380466461	1.12867248058319	0.944565892219543	-0.0383826866745949	0.707589209079742	Discard	Keep	+	1%_21%	+_Discard	+_Keep	1	1	1	24625	43611	38429	13849665,5	50487492	0,274318754673004	-3.64539	1,41357402802325	-1,37122244201601	-2,63912326121063	Q9NUM3-3;Q9NUM3-2;Q9NUM3	Q9NUM3-3;Q9NUM3-2;Q9NUM3	Zinc transporter ZIP9	SLC39A9

## Sheet: Ri-1 up-regulated 5%
Column1	Column2	Column3	Column4	Column5	Column6	Column7	Column8	Column9	Column10	Column11	Column12	Column13	Column14	Column15	Column16	Column17	Column18	Column19	Column20	Column21	Column22	Column23	Column23A	Column24	Column25	Column26	Column27	Column28	Column29	Column30
Ri-1.5%.1	Ri-1.5%.2	Ri-1.5%.3	Ri-1.5%.4	Ri-1.21%.1	Ri-1.21%.2	Ri-1.21%.3	Ri-1.21%.4	Student's T-test Significant 5%_21%	Student's T-test significant	x>=1.5	x<=0.66	Student's T-test Significant 5%_21%_x>=1.5	Student's T-test Significant 5%_21%_x<=0.66	Peptides	Razor + unique peptides	Unique peptides	Mol. weight [kDa]	Q-value	Score	5%	21%	5%_x/y_21%	fold change	-Log Student's T-test p-value 5%_21%	Student's T-test Difference 5%_21%	Student's T-test Test statistic 5%_21%	Protein IDs	Majority protein IDs	Protein names	Gene names
0.311348080635071	0.148053079843521	0.314790785312653	0.187264412641525	0.0796737745404243	-0.231299355626106	-0.0962344855070114	-0.020833246409893	+	5%_21%	Keep	Discard	+_Keep	+_Discard	11	11	11	75475	0	14518	518310952	304527268	1,70201814174652	1,70201814174652	2,11374692272645	0,307537417858839	3,9319144743118	P28288;P28288-2;P28288-3	P28288;P28288-2	ATP-binding cassette sub-family D member 3	ABCD3
0.113438732922077	0.0632580071687698	-0.10884340852499	-0.0547098815441132	-0.311524003744125	-0.286043882369995	-0.426789909601212	-0.214447230100632	+	5%_21%	Keep	Discard	+_Keep	+_Discard	9	9	9	68124	0	11784	338264392	195146400	1,73338782787323	1,73338782787323	2,44302534413541	0,312987118959427	4,62258537791281	Q96CM8;E9PF16;Q96CM8-3;Q96CM8-2;Q96CM8-4;D6RF87	Q96CM8;E9PF16;Q96CM8-3;Q96CM8-2;Q96CM8-4	Acyl-CoA synthetase family member 2, mitochondrial	ACSF2
0.756410598754883	0.629787802696228	0.832442283630371	0.710614025592804	0.39866903424263	0.524806141853333	-0.682793259620667	-0.712860584259033	+	5%_21%	Keep	Discard	+_Keep	+_Discard	19	19	19	72911	0	32331	1259354560	430170526	2,92757058143616	2,92757058143616	1,3396263105443	0,850358344614506	2,51250332055124	O00116;B8ZZ81	O00116	Alkyldihydroxyacetonephosphate synthase, peroxisomal	AGPS
0.563983917236328	0.624374687671661	0.487456023693085	0.657098472118378	0.0818732529878616	0.161245256662369	-0.0203409846872091	-1.13637018203735	+	5%_21%	Keep	Discard	+_Keep	+_Discard	15	15	15	57839	0	13661	956913200	298363124	3,20720982551575	3,20720982551575	1,41523786486662	0,811626439448446	2,64198778357929	Q02252;Q02252-2;G3V4Z4	Q02252;Q02252-2;G3V4Z4	Methylmalonate-semialdehyde dehydrogenase [acylating], mitochondrial	ALDH6A1
-0.547836124897003	-0.472840517759323	-0.474592298269272	-0.43653193116188	-0.772591531276703	-1.68782913684845	-1.24281966686249	-0.96895432472229	+	5%_21%	Keep	Discard	+_Keep	+_Discard	20	20	20	55366	0	20937	139119904	48487347	2,8691999912262	2,8691999912262	1,85555922877976	0,685098446905613	3,43148741277824	P49419-2;P49419;P49419-4;F8VS02;P49419-3;F8VVF2;H0YHM6	P49419-2;P49419;P49419-4;F8VS02;P49419-3	Alpha-aminoadipic semialdehyde dehydrogenase	ALDH7A1
1.81018447875977	1.88796722888947	1.86443328857422	1.87339913845062	0.63910299539566	0.652198076248169	0.664890944957733	0.601277947425842	+	5%_21%	Keep	Discard	+_Keep	+_Discard	8	5	5	28787	0	1751	9541523968	1064629296	8,96229648590088	8,96229648590088	8,65427421213924	1,21962854266167	55,8338590363807	Q92688;Q92688-2	Q92688;Q92688-2	Acidic leucine-rich nuclear phosphoprotein 32 family member B	ANP32B
0.206543564796448	0.0941220223903656	0.131828814744949	0.103129744529724	-0.0412968881428242	-0.854960143566132	-2.03460597991943	-0.827321410179138	+	5%_21%	Keep	Discard	+_Keep	+_Discard	4	4	4	22284	16247	73687	424738728	115447218,25	3,67907285690308	3,67907285690308	1,39524736070024	1,07345214206725	2,60761830895357	Q9BUR5;H7C1U8;Q9BUR5-2;G3V1B6	Q9BUR5;H7C1U8;Q9BUR5-2;G3V1B6	Apolipoprotein O	APOO
-0.207574442028999	-0.355698227882385	-0.331596374511719	-0.298324644565582	-1.73245286941528	-1.09328067302704	-0.881134569644928	-0.404549866914749	+	5%_21%	Keep	Discard	+_Keep	+_Discard	3	3	3	29337	15576	58711	194951544	75139308,25	2,59453463554382	2,59453463554382	1,4082596053393	0,729556072503328	2,62997854298364	Q8N8R7;E9PRK7	Q8N8R7;E9PRK7	ARL14 effector protein	ARL14EP
0.307554930448532	0.332253217697144	0.29358834028244	0.308377325534821	-1.04018640518188	0.304725676774979	-1.07085812091827	-1.01223802566528	+	5%_21%	Keep	Discard	+_Keep	+_Discard	16	16	16	77959	0	50504	581792544	183201967	3,17568922042847	3,17568922042847	1,62761040314289	1,01508267223835	3,0142309337996	O95352;O95352-3;O95352-2;C9JFF4;C9J415;H7C2R3;H7BZ92;C9JE55;H7C2J8;C9JGL2;F8WDY9;C9JNU2;C9JKA3;H7C059;H7C369	O95352;O95352-3;O95352-2	Ubiquitin-like modifier-activating enzyme ATG7	ATG7
-1.3838437795639	-1.44308054447174	-1.33242583274841	-1.16444957256317	-1.62219321727753	-1.62430095672607	-1.7294145822525	-1.75725662708282	+	5%_21%	Keep	Discard	+_Keep	+_Discard	14	5	5	13792	16586	82824	30530843,5	16354190	1,86685144901276	1,86685144901276	2,64145780326509	0,352341413497925	5,07212695898726	P23634;P23634-6;P23634-7;P23634-8;P23634-2;P23634-5;P23634-4;P23634-3	P23634;P23634-6;P23634-7;P23634-8;P23634-2;P23634-5;P23634-4;P23634-3	Plasma membrane calcium-transporting ATPase 4	ATP2B4
1.76339900493622	1.7090756893158	1.58008313179016	1.7340704202652	0.73717325925827	0.685114443302155	0.792318403720856	0.595413625240326	+	5%_21%	Keep	Discard	+_Keep	+_Discard	5	5	2	13714	0	68477	7161296768	1200556848	5,96497964859009	5,96497964859009	5,58938844530051	0,994152128696442	17,0836693282827	P61769;H0YL18;F5H6I0	P61769;H0YL18;F5H6I0	Beta-2-microglobulin;Beta-2-microglobulin form pI 5.3;Beta-2-microglobulin	B2M
-0.571189343929291	-0.704297602176666	-0.637526392936707	-0.688237428665161	-1.04571902751923	-0.878391206264496	-0.80045223236084	-0.852729737758636	+	5%_21%	Keep	Discard	+_Keep	+_Discard	5	5	5	66999	0	1446	103258402	68527032	1,50682723522186	1,50682723522186	2,15119843471096	0,244010359048843	4,00731321501371	Q9H8M2;Q9H8M2-6;Q9H8M2-3;Q9H8M2-1;Q9H8M2-2;H0YBR9;H0YAW8;H0YBF1	Q9H8M2;Q9H8M2-6;Q9H8M2-3;Q9H8M2-1;Q9H8M2-2	Bromodomain-containing protein 9	BRD9
0.11849182844162	0.00302709941752255	-0.0347628034651279	-0.443689435720444	-1.17137277126312	-0.795335829257965	-0.722447574138641	-0.494841814041138	+	5%_21%	Keep	Discard	+_Keep	+_Discard	10	5	3	62608	0	34734	302606796	88991266	3,40040993690491	3,40040993690491	2,04229175938219	0,706766169343609	3,7901201001728	Q13555;Q13555-5;Q5SWX3;Q13555-9;Q13555-2;A0A0A0MS52;A0A0A0MT11;Q13555-10;Q13555-3;Q13555-4;Q13555-7;Q13555-8;Q13555-6;Q8WU40;H0Y6G2;H7C394	Q13555;Q13555-5;Q5SWX3;Q13555-9;Q13555-2;A0A0A0MS52;A0A0A0MT11;Q13555-10;Q13555-3;Q13555-4;Q13555-7;Q13555-8;Q13555-6;Q8WU40;H0Y6G2	Calcium/calmodulin-dependent protein kinase type II subunit gamma	CAMK2G
-0.795270800590515	-0.850403964519501	-1.01046085357666	-0.890693306922913	-2.205246925354	-1.37139141559601	-1.31861925125122	-1.13105893135071	+	5%_21%	Keep	Discard	+_Keep	+_Discard	13	13	13	13475	0	11087	67564818	28090768,25	2,40523195266724	2,40523195266724	1,3630053369875	0,619871899485588	2,55239380445935	Q9P1Y5;Q9P1Y5-2	Q9P1Y5;Q9P1Y5-2	Calmodulin-regulated spectrin-associated protein 3	CAMSAP3
0.769987404346466	0.713612079620361	0.916037023067474	0.614347219467163	0.584820508956909	0.215470001101494	0.212609738111496	0.465108215808868	+	5%_21%	Keep	Discard	+_Keep	+_Discard	13	13	13	62223	0	5868	1323929584	683259416	1,93766760826111	1,93766760826111	1,84817251674517	0,383993815630674	3,41763198328647	Q9HA77;H0YFF0;H0YFV1;F5H623;F5H579;A0A087WWV1	Q9HA77	Probable cysteine--tRNA ligase, mitochondrial	CARS2
-0.774020552635193	-0.699790179729462	-0.900962471961975	-0.99209076166153	-1.17286336421967	-1.22810089588165	-1.27190721035004	-1.23671770095825	+	5%_21%	Keep	Discard	+_Keep	+_Discard	8	8	8	5608	0	14667	74144595	37050601	2,00117111206055	2,00117111206055	2,88028593219188	0,385681301355362	5,65131025053912	Q14781	Q14781	Chromobox protein homolog 2	CBX2
0.63250195980072	0.707576870918274	0.614084541797638	0.577894628047943	0.243404984474182	0.336723029613495	0.607654511928558	0.237079590559006	+	5%_21%	Keep	Discard	+_Keep	+_Discard	7	7	7	24479	0	13542	1045175760	665089864	1,57148051261902	1,57148051261902	1,64208522793324	0,276798970997334	3,04013410848372	Q86WR0;Q86WR0-2;G3V121;B7Z2L8;Q0VGD4	Q86WR0;Q86WR0-2	Coiled-coil domain-containing protein 25	CCDC25
1.8454315662384	1.84311091899872	0.695931077003479	1.77373325824738	0.663035750389099	0.719411969184875	0.687394678592682	0.650469541549683	+	5%_21%	Keep	Discard	+_Keep	+_Discard	20	19	18	34095	0	32331	6952079200	1145796192	6,06746578216553	6,06746578216553	1,64570222171712	0,859473720192909	3,04661848723208	P06493;A0A024QZP7;P06493-2;A0A087WZZ9;E5RIU6;Q07002;Q07002-3;Q07002-2	P06493;A0A024QZP7;P06493-2;A0A087WZZ9;E5RIU6	Cyclin-dependent kinase 1	CDK1;CDC2
-0.305203169584274	-0.347030609846115	-0.518630683422089	-0.187818601727486	-0.715291380882263	-0.58441162109375	-0.421987146139145	-0.578328549861908	+	5%_21%	Keep	Discard	+_Keep	+_Discard	20	20	20	10683	0	64299	183333840	122122110	1,50123381614685	1,50123381614685	1,38155496107268	0,235333908349276	2,58413498988225	Q03188;H0Y8J2;Q03188-2;H0Y9W1	Q03188;H0Y8J2;Q03188-2	Centromere protein C	CENPC
0.518793344497681	0.551613509654999	0.431267470121384	0.589467585086823	0.277181088924408	0.277659147977829	0.295723915100098	0.280524075031281	+	5%_21%	Keep	Discard	+_Keep	+_Discard	12	12	12	5091	0	73068	857084096	560444736	1,52929282188416	1,52929282188416	3,39071419424675	0,240013420581818	7,05229580826126	Q8WUX9;E5RJI3;E5RIU9;Q8WUX9-2	Q8WUX9	Charged multivesicular body protein 7	CHMP7
1.15645635128021	0.0165551863610744	1.09832608699799	1.3499561548233	0.176972523331642	0.0372240655124187	-0.041933324187994	0.0242902375757694	+	5%_21%	Keep	Discard	+_Keep	+_Discard	12	12	9	47535	0	82802	2314036160	371149976	6,23477411270142	6,23477411270142	1,51259266391048	0,856185069307685	2,81091855750316	Q13363;Q13363-2;D6RAX2;H0Y8W7;E7ESU7;E7EPF8;H0Y9M9;E9PGB1;H0Y8U5;A0A087WYL1;E7EUB3	Q13363;Q13363-2;D6RAX2;H0Y8W7	C-terminal-binding protein 1	CTBP1
-0.296886146068573	0.0411149598658085	0.00235839863307774	-0.411178380250931	-0.847759962081909	-0.512283205986023	-0.565846085548401	-0.30963459610939	+	5%_21%	Keep	Discard	+_Keep	+_Discard	6	3	3	48944	0	86361	261319068	131756030	1,98335564136505	1,98335564136505	1,33193674551881	0,392733170476276	2,49940993201951	P56545;P56545-2;Q5SQP8	P56545;P56545-2;Q5SQP8	C-terminal-binding protein 2	CTBP2
0.221691131591797	-0.0366660617291927	-0.119332835078239	0.0729831159114838	-0.194663807749748	-0.151444643735886	-0.168687880039215	-0.352727353572845	+	5%_21%	Keep	Discard	+_Keep	+_Discard	13	12	12	61585	0	28885	363212680	229643588	1,5816365480423	1,5816365480423	1,55862898495479	0,251549758948386	2,89177717847361	Q14247;Q14247-3;Q14247-2;H0YCD9;H0YEV2	Q14247;Q14247-3;Q14247-2	Src substrate cortactin	CTTN
-0.0094921262934804	-0.0716010704636574	-0.483293026685715	0.187824353575706	-0.879306733608246	-0.459389328956604	-0.736208736896515	-0.531999468803406	+	5%_21%	Keep	Discard	+_Keep	+_Discard	6	6	6	39745	0	31065	304127156	109484814	2,77780222892761	2,77780222892761	1,76875620797076	0,557585599599406	3,27014490684772	P61073;P61073-2	P61073;P61073-2	C-X-C chemokine receptor type 4	CXCR4
1.81924259662628	1.87095212936401	1.70905411243439	1.77612173557281	0.731824994087219	0.643540143966675	0.63484513759613	0.621456146240234	+	5%_21%	Keep	Discard	+_Keep	+_Discard	26	26	26	54416	0	32331	8516511104	1102682688	7,72344732284546	7,72344732284546	6,74498934474959	1,13592603802681	26,7585859229521	P26196;Q8IV96	P26196	Probable ATP-dependent RNA helicase DDX6	DDX6
0.0450020208954811	-0.106299236416817	-0.187431767582893	-0.118436448276043	-0.495891273021698	-0.502705514431	-0.470514684915543	-0.315605819225311	+	5%_21%	Keep	Discard	+_Keep	+_Discard	10	10	9	53671	0	28147	284871520	153040968	1,86140704154968	1,86140704154968	2,77024521220677	0,35438796505332	5,37898527659924	Q9H6A0;Q9H6A0-2;Q68D51-3	Q9H6A0;Q9H6A0-2	DENN domain-containing protein 2D	DENND2D
0.340754836797714	0.389804244041443	0.452173501253128	0.430427134037018	0.122077330946922	0.10551368445158	0.0511577315628529	0.0907009169459343	+	5%_21%	Keep	Discard	+_Keep	+_Discard	26	25	25	13931	0	16321	690054448	398050672	1,7335844039917	1,7335844039917	4,42483273357735	0,310927513055503	10,78430595085	Q14562;F5H658;K7EQH7;S4R3S0	Q14562;F5H658	ATP-dependent RNA helicase DHX8	DHX8
-0.642623126506805	-0.637857437133789	-0.615402340888977	-0.627153098583221	-1.40002465248108	-1.45269596576691	-1.12866759300232	-2.37508678436279	+	5%_21%	Keep	Discard	+_Keep	+_Discard	12	12	12	79494	0	32129	106374278	24885325,5	4,27457857131958	4,27457857131958	1,90761911759639	0,958359748125076	3,52982676667882	Q08426;Q08426-2;C9JJE0	Q08426;Q08426-2	Peroxisomal bifunctional enzyme;Enoyl-CoA hydratase/3,2-trans-enoyl-CoA isomerase;3-hydroxyacyl-CoA dehydrogenase	EHHADH
-0.109640799462795	-0.127134501934052	-0.0367243327200413	0.0792321935296059	-1.42570877075195	-1.56537020206451	-0.237223476171494	-1.46514749526978	+	5%_21%	Keep	Discard	+_Keep	+_Discard	18	18	18	12902	0	17165	307383464	72467577,5	4,24166870117188	4,24166870117188	1,91780218362557	1,12479562591761	3,54920614614853	Q96KQ7-2;A0A0G2JIS2;A2ABF8;Q96KQ7;A0A0G2JIR1;A2ABF9;A0A0G2JK64;A0A0G2JRR0;A0A0G2JRN8;H0Y4K5;Q96KQ7-3	Q96KQ7-2;A0A0G2JIS2;A2ABF8;Q96KQ7;A0A0G2JIR1;A2ABF9;A0A0G2JK64;A0A0G2JRR0;A0A0G2JRN8	Histone-lysine N-methyltransferase EHMT2	EHMT2
1.31268167495728	1.14562559127808	1.07849156856537	1.06678211688995	0.452673226594925	0.64826762676239	0.486281007528305	0.604733288288116	+	5%_21%	Keep	Discard	+_Keep	+_Discard	29	14	14	46402	0	32331	2699526016	913410336	2,95543646812439	2,95543646812439	3,75453863323198	0,602906450629234	8,21157782736078	Q14240;Q14240-2;E7EQG2;J3KSN7;E7EMV8;E9PBH4;C9JUF0;F8WE11	Q14240;Q14240-2;E7EQG2	Eukaryotic initiation factor 4A-II;Eukaryotic initiation factor 4A-II, N-terminally processed	EIF4A2
-0.947364389896393	-0.563480734825134	-0.570837318897247	-0.581488430500031	-2.03235936164856	-2.43176102638245	-1.32243728637695	-1.34783899784088	+	5%_21%	Keep	Discard	+_Keep	+_Discard	11	11	11	10023	0	13343	103529915	18729392,5	5,52767086029053	5,52767086029053	2,09319801929521	1,11780644953251	3,89086407209657	Q7Z2K6;E7ER77;A0A0C4DGF0;Q7Z2K6-2	Q7Z2K6;E7ER77	Endoplasmic reticulum metallopeptidase 1	ERMP1
0.635402321815491	0.503036379814148	0.592034041881561	0.491893500089645	0.209724307060242	0.397865235805511	0.32983136177063	0.305498868227005	+	5%_21%	Keep	Discard	+_Keep	+_Discard	7	7	7	25764	0	12445	912483264	593740800	1,53683769702911	1,53683769702911	2,47372986718085	0,244861617684364	4,69039465155194	Q9BRX8;Q9BRX8-2	Q9BRX8;Q9BRX8-2	Redox-regulatory protein FAM213A	FAM213A
-0.725824058055878	-0.477703928947449	-0.969721853733063	-0.57722544670105	-1.12922203540802	-1.61858201026917	-0.982070088386536	-1.26124572753906	+	5%_21%	Keep	Discard	+_Keep	+_Discard	10	10	10	43064	0	15958	100494357	38590779	2,60410284996033	2,60410284996033	1,75004332975612	0,560161143541336	3,23577344892071	O95684;O95684-2;A0A087WV25;O95684-3;Q8N103-3	O95684;O95684-2;A0A087WV25	FGFR1 oncogene partner	FGFR1OP
-0.941725611686707	-0.795980215072632	-1.15572798252106	-1.1171327829361	-1.88628888130188	-0.963545680046082	-1.80988550186157	-2.07051587104797	+	5%_21%	Keep	Discard	+_Keep	+_Discard	17	16	2	66245	0	32331	56102986	22968795,75	2,44257402420044	2,44257402420044	1,40243319999947	0,679917335510254	2,61996115012872	Q06787-8;Q06787-5;Q06787-9;Q06787;Q06787-3	Q06787-8;Q06787-5;Q06787-9;Q06787;Q06787-3	Fragile X mental retardation protein 1	FMR1
1.74555706977844	1.74622559547424	1.719393491745	1.77431070804596	0.737694919109344	0.638025999069214	0.672828555107117	1.8114972114563	+	5%_21%	Keep	Discard	+_Keep	+_Discard	23	23	22	52164	0	32331	7780615808	3117449536	2,49582743644714	2,49582743644714	1,4832028731822	0,781360045075417	2,75963690853588	Q13283;E5RIZ6;E5RI46;E5RIF8;E5RH42;E5RJU8;Q13283-2;E5RH00	Q13283	Ras GTPase-activating protein-binding protein 1	G3BP1
1.18526422977448	1.31328010559082	1.40163767337799	1.40151631832123	-1.35948836803436	1.32912766933441	-0.166589930653572	-0.000503898074384779	+	5%_21%	Keep	Discard	+_Keep	+_Discard	9	9	9	25497	0	12026	3680892480	1058730452	3,47670412063599	3,47670412063599	1,32518698666548	1,37478821362311	2,48792747861474	Q9Y2Q3;Q9Y2Q3-3;Q9Y2Q3-2;E9PFN5;C9JNT3;Q9Y2Q3-4	Q9Y2Q3;Q9Y2Q3-3;Q9Y2Q3-2;E9PFN5;C9JNT3;Q9Y2Q3-4	Glutathione S-transferase kappa 1	GSTK1
-0.190654546022415	-0.201867207884789	-0.253828793764114	-0.0572573393583298	-0.42664298415184	-0.503254175186157	-0.456560552120209	-0.282382786273956	+	5%_21%	Keep	Discard	+_Keep	+_Discard	15	15	14	10293	0	38833	243442764	161403404	1,50828766822815	1,50828766822815	2,04990898088617	0,241308152675629	3,80510969600346	Q8WUI4;J3KPH8;Q8WUI4-3;Q8WUI4-4;Q8WUI4-7;Q8WUI4-6;Q8WUI4-5;Q8WUI4-8;Q8WUI4-10;H0YH91;Q8WUI4-9;Q8WUI4-2;A0A087WYQ4;C9J102;C9JNI4;F8VWY3;C9JEB6;C9JBC2;C9JVZ1;C9JF80;C9JAH2;C9JH46;H0YI15;C9JZ79;C9JGF5	Q8WUI4;J3KPH8;Q8WUI4-3;Q8WUI4-4;Q8WUI4-7;Q8WUI4-6;Q8WUI4-5;Q8WUI4-8;Q8WUI4-10	Histone deacetylase 7;Histone deacetylase	HDAC7
-1.26088583469391	-1.31456744670868	-1.44587016105652	-1.54161274433136	-1.98470306396484	-1.66996312141418	-1.61169910430908	-1.53393840789795	+	5%_21%	Keep	Discard	+_Keep	+_Discard	22	22	13	46865	0	60405	27518911,5	16673704,25	1,65043783187866	1,65043783187866	1,40927291482713	0,309341877698898	2,63172162060152	J3KPF0;F8VWT9;Q9Y4D8;Q9Y4D8-4;Q9Y4D8-2;Q9Y4D8-3	J3KPF0;F8VWT9;Q9Y4D8;Q9Y4D8-4	Probable E3 ubiquitin-protein ligase HECTD4	HECTD4
1.21548390388489	1.51016175746918	1.45885670185089	1.12200379371643	1.16342353820801	1.03405153751373	1.01286768913269	0.996930420398712	+	5%_21%	Keep	Discard	+_Keep	+_Discard	12	12	0	14121	0	32331	3801312960	2248805600	1,69036972522736	1,69036972522736	1,45908444877349	0,274808242917061	2,71774105417965	Q7L7L0;P04908	Q7L7L0;P04908	Histone H2A type 3;Histone H2A type 1-B/E	HIST3H2A;HIST1H2AB
-0.704479277133942	-0.707360506057739	-0.847526073455811	-0.776797711849213	-1.26654481887817	-1.02557444572449	-0.994636535644531	-0.880490362644196	+	5%_21%	Keep	Discard	+_Keep	+_Discard	11	11	11	11482	3017	48456	84727618	53685339	1,57822632789612	1,57822632789612	1,73887120912075	0,282770648598671	3,21531965369903	Q9UPZ3-2;Q9UPZ3;F5GWM5;F5H6Q8;G3V159	Q9UPZ3-2;Q9UPZ3	Hermansky-Pudlak syndrome 5 protein	HPS5
-0.225195050239563	-0.299793422222137	0.0937389880418777	-0.210329413414001	-0.521021723747253	-0.484421133995056	-0.603483855724335	-0.617213845252991	+	5%_21%	Keep	Discard	+_Keep	+_Discard	1	1	1	85435	0	45263	259912792	124160642	2,09335899353027	2,09335899353027	2,28098831152443	0,396140415221453	4,2746708496379	O75506	O75506	Heat shock factor-binding protein 1	HSBP1
1.62742125988007	1.65889620780945	1.74539422988892	1.7091703414917	1.44929909706116	1.35639750957489	1.48077249526978	1.43059003353119	+	5%_21%	Keep	Discard	+_Keep	+_Discard	31	26	17	70108	0	32331	6988789760	4427545024	1,57847964763641	1,57847964763641	3,33352201115765	0,255955725908279	6,88303274455829	A0A0G2JIW1;P0DMV9;P0DMV8;P0DMV8-2;V9GZ37	A0A0G2JIW1;P0DMV9;P0DMV8;P0DMV8-2;V9GZ37	Heat shock 70 kDa protein 1B;Heat shock 70 kDa protein 1A	HSPA1B;HSPA1A
0.896302402019501	1.08978950977325	1.04969012737274	1.20495665073395	-0.167314916849136	1.17152166366577	0.0401520580053329	-0.225281447172165	+	5%_21%	Keep	Discard	+_Keep	+_Discard	3	3	3	14665	0	12702	2293454400	889249088	2,57909107208252	2,57909107208252	1,37078662136862	0,85541533306241	2,56569874457365	Q9NX55;J3QT56;Q9NX55-3	Q9NX55	Huntingtin-interacting protein K	HYPK
-1.07483673095703	-0.563822150230408	-0.979380190372467	-0.389440387487411	-1.44388973712921	-1.28747463226318	-1.26638746261597	-1.25465285778046	+	5%_21%	Keep	Discard	+_Keep	+_Discard	26	24	24	14734	0	17637	96230305	32146936	2,99345183372498	2,99345183372498	1,78737020633993	0,561231307685375	3,30447620775881	Q9Y4C1;F5H070;F8WE62;C9J7Q7;C9JC73	Q9Y4C1;F5H070;F8WE62	Lysine-specific demethylase 3A	KDM3A
-1.15133249759674	-1.27806293964386	-1.17217183113098	-0.85930722951889	-1.66849458217621	-1.3188841342926	-1.64739155769348	-1.50570297241211	+	5%_21%	Keep	Discard	+_Keep	+_Discard	11	10	9	12066	0	16317	46081847	22083316,75	2,08672690391541	2,08672690391541	1,88203225995547	0,419899687170982	3,48134175732553	O75164;O75164-2	O75164	Lysine-specific demethylase 4A	KDM4A
-1.26553583145142	-1.61500406265259	-2.67008876800537	-1.51329612731934	-2.26055455207825	-3.58556890487671	-3.76452469825745	-2.72988939285278	+	5%_21%	Keep	Discard	+_Keep	+_Discard	8	8	8	17663	98592	31203	18887972,25	2231555,5	8,46403884887695	8,46403884887695	1,5036109866881	1,31915318965912	2,79521932274636	O15054;O15054-1;I3L0Z0	O15054;O15054-1	Lysine-specific demethylase 6B	KDM6B
0.506637752056122	0.452397048473358	0.440518349409103	0.317534029483795	0.0810157582163811	0.262483030557632	0.176997229456902	0.144026920199394	+	5%_21%	Keep	Discard	+_Keep	+_Discard	13	13	13	70713	0	10853	727272224	457429296	1,58991169929504	1,58991169929504	2,51679380523713	0,263141060248017	4,78655480447261	Q9P2G3;Q9P2G3-2;J3QQM3	Q9P2G3;Q9P2G3-2	Kelch-like protein 14	KLHL14
-0.606554388999939	-1.03957796096802	-0.849120616912842	-1.06272840499878	-1.64928352832794	-1.33343183994293	-1.23925709724426	-1.43063032627106	+	5%_21%	Keep	Discard	+_Keep	+_Discard	11	11	11	164	0	1523	70960610	27572225	2,57362651824951	2,57362651824951	2,05156531441325	0,523655354976654	3,80837304121347	Q8WXG6-6;Q8WXG6-8;Q8WXG6-5;Q8WXG6-4;Q8WXG6;Q8WXG6-3;A0A0A0MRB5;Q8WXG6-7;Q8WXG6-2;C9JLZ9;C9K0L0;C9J6B0;F8W8U2;C9JM97	Q8WXG6-6;Q8WXG6-8;Q8WXG6-5;Q8WXG6-4;Q8WXG6;Q8WXG6-3;A0A0A0MRB5;Q8WXG6-7;Q8WXG6-2	MAP kinase-activating death domain protein	MADD
0.168016448616982	0.189662218093872	0.130971983075142	0.150527492165565	-0.171780169010162	-0.0305642671883106	-0.0954588502645493	-0.17924952507019	+	5%_21%	Keep	Discard	+_Keep	+_Discard	45	45	44	27063	0	32331	443394248	273276232	1,62251305580139	1,62251305580139	3,53289400275198	0,279057738371193	7,48786707676033	P46821;D6RA32;D6RA40;D6RGJ3;D6RCL2	P46821	Microtubule-associated protein 1B;MAP1B heavy chain;MAP1 light chain LC1	MAP1B
-0.511552631855011	-0.496974110603333	-0.631566047668457	-0.435081750154495	-0.719877600669861	-0.817035317420959	-0.773900806903839	-0.755394458770752	+	5%_21%	Keep	Discard	+_Keep	+_Discard	12	12	12	99594	0	48616	130902620	84952446	1,54089295864105	1,54089295864105	2,78334144188134	0,247758410871029	5,41089433731466	Q6DN12;Q6DN12-2;Q6DN12-3;Q6DN12-4;F5H415;Q6DN12-6	Q6DN12;Q6DN12-2;Q6DN12-3;Q6DN12-4	Multiple C2 and transmembrane domain-containing protein 2	MCTP2
-0.351604580879211	-0.344143122434616	0.109031111001968	-0.291061401367188	-0.683933317661285	-1.4920129776001	-0.697175204753876	-1.1966872215271	+	5%_21%	Keep	Discard	+_Keep	+_Discard	8	8	8	50733	0	14604	240116768	63503025	3,78118634223938	3,78118634223938	1,90179193834637	0,798007681965828	3,51875851829336	Q9H7H0;Q9H7H0-2;Q9H7H0-3;G3V353;G3V4P2;G3V3X6;G3V4H5;H0YJW1;B4E298	Q9H7H0;Q9H7H0-2;Q9H7H0-3;G3V353	Methyltransferase-like protein 17, mitochondrial	METTL17
0.595961213111877	0.483322441577911	0.888227760791779	0.556800484657288	0.421105325222015	0.355198919773102	0.46784695982933	0.267635554075241	+	5%_21%	Keep	Discard	+_Keep	+_Discard	4	1	1	18648	1	-2	1086050128	669733120	1,62161636352539	1,62161636352539	1,36737103300285	0,253131285309792	2,55985678908223	E7EMN2	E7EMN2		METTL5
-0.268085539340973	-0.0923880934715271	-0.0342957749962807	-0.18535353243351	-0.68102639913559	-0.255167424678802	-0.438351094722748	-0.380515217781067	+	5%_21%	Keep	Discard	+_Keep	+_Discard	20	20	19	98583	0	10202	259104860	159277980	1,62674629688263	1,62674629688263	1,534090010617	0,293734299018979	2,84859412539686	Q9NXC5;Q9NXC5-2;C9JAQ1;C9JTV2	Q9NXC5;Q9NXC5-2	WD repeat-containing protein mio	MIOS
0.513069570064545	0.509692966938019	0.533434629440308	0.553195834159851	0.0538970939815044	0.446920365095139	0.0972937941551208	0.329061597585678	+	5%_21%	Keep	Discard	+_Keep	+_Discard	5	5	5	20616	0	34365	861093728	534522080	1,61096012592316	1,61096012592316	1,69438766613411	0,29555503744632	3,13436418826645	P82912;P82912-2;H0YL99;P82912-3	P82912;P82912-2;H0YL99	28S ribosomal protein S11, mitochondrial	MRPS11
0.775080859661102	0.63334709405899	0.801567494869232	0.528131723403931	0.372925847768784	0.386635810136795	0.401283860206604	0.290981471538544	+	5%_21%	Keep	Discard	+_Keep	+_Discard	3	3	3	35215	0	69208	1168772576	648270560	1,80290853977203	1,80290853977203	2,47597041811043	0,321575045585632	4,69536713619006	Q15800;D6RDP9;D6R952;D6REA2;Q15800-2	Q15800;D6RDP9;D6R952	Methylsterol monooxygenase 1	MSMO1
-0.486770927906036	-0.73241662979126	-0.785739779472351	-0.807104051113129	-1.30909335613251	-1.16284418106079	-1.22173666954041	-1.19073522090912	+	5%_21%	Keep	Discard	+_Keep	+_Discard	8	8	8	60069	0	45964	96193634	37718964	2,5502724647522	2,5502724647522	3,18283206712908	0,518094509840012	6,45257893226041	Q9UIF7;E9PM53;E5KP25;Q9UIF7-6;Q9UIF7-5;Q9UIF7-4;Q9UIF7-3;Q9UIF7-2;Q5T413;E9PMH1;H0YCY5;E9PNY0;Q5T418;E9PP34	Q9UIF7;E9PM53;E5KP25;Q9UIF7-6;Q9UIF7-5;Q9UIF7-4;Q9UIF7-3;Q9UIF7-2;Q5T413	A/G-specific adenine DNA glycosylase	MUTYH
-0.680802822113037	-0.800242781639099	-0.761696934700012	-0.875283181667328	-1.05446374416351	-0.953570246696472	-0.983561933040619	-1.10096085071564	+	5%_21%	Keep	Discard	+_Keep	+_Discard	21	21	4	15915	0	70801	82111191	53704363	1,52894818782806	1,52894818782806	2,4502218539112	0,243632763624191	4,63842293682939	Q15596;H0YBB6	Q15596	Nuclear receptor coactivator 2	NCOA2
0.41905951499939	0.487750172615051	0.260557144880295	0.581885695457458	0.175273552536964	0.257450938224792	0.133240178227425	0.244201868772507	+	5%_21%	Keep	Discard	+_Keep	+_Discard	3	3	3	13711	0	26525	745450384	487362064	1,52956175804138	1,52956175804138	1,72069373203433	0,234771497547626	3,18214584669551	O75380;D6RBT3	O75380;D6RBT3	NADH dehydrogenase [ubiquinone] iron-sulfur protein 6, mitochondrial	NDUFS6
0.167155206203461	0.218691393733025	0.258461743593216	0.083018384873867	-0.100282147526741	-0.171648427844048	0.108628213405609	-0.160030648112297	+	5%_21%	Keep	Discard	+_Keep	+_Discard	11	11	6	45816	0	20303	464976920	297563788	1,56261265277863	1,56261265277863	1,88619104627965	0,262664934620261	3,48920211201586	Q8NCF5;Q8NCF5-2;H3BSZ7	Q8NCF5;Q8NCF5-2	NFATC2-interacting protein	NFATC2IP
-1.3089804649353	-1.36235725879669	-1.42701244354248	-1.57844364643097	-2.06175708770752	-2.34840035438538	-1.73472440242767	-1.79277217388153	+	5%_21%	Keep	Discard	+_Keep	+_Discard	12	11	11	11559	0	16774	26072863,5	10410536,25	2,50446891784668	2,50446891784668	2,00195370120843	0,565215051174164	3,71122840998953	Q12968;H3BRS1;I3L3K7;Q12968-4;Q12968-3;Q12968-2;H3BR83;Q12968-5;Q12968-6;F8VPH9;H3BRM3;H3BU30	Q12968;H3BRS1;I3L3K7;Q12968-4;Q12968-3;Q12968-2;H3BR83;Q12968-5;Q12968-6	Nuclear factor of activated T-cells, cytoplasmic 3	NFATC3
0.0722406655550003	0.00558929238468409	0.0790256857872009	0.113713294267654	-0.266910046339035	-0.0805613473057747	-0.185655757784843	-0.170485854148865	+	5%_21%	Keep	Discard	+_Keep	+_Discard	10	10	2	50302	0	45904	376280536	247465188	1,52053928375244	1,52053928375244	2,81533211873956	0,243545485893264	5,4894030468073	Q13952;Q13952-5;Q13952-3	Q13952;Q13952-5;Q13952-3	Nuclear transcription factor Y subunit gamma	NFYC
0.509726524353027	0.545527815818787	0.4989133477211	0.678877949714661	-0.570978105068207	0.714066386222839	-0.528368234634399	-0.673462808132172	+	5%_21%	Keep	Discard	+_Keep	+_Discard	15	15	15	84918	0	18763	916747312	387727808	2,36440944671631	2,36440944671631	1,32740272393746	0,822947099804878	2,49169572247376	Q9Y3T9	Q9Y3T9	Nucleolar complex protein 2 homolog	NOC2L
-0.303520262241364	-0.173731327056885	0.00719050969928503	-0.166690155863762	-0.639517545700073	-0.360519737005234	-0.63016813993454	-0.251458883285522	+	5%_21%	Keep	Discard	+_Keep	+_Discard	9	9	9	32162	0	20784	254671300	152415702	1,67089939117432	1,67089939117432	1,43211104697151	0,311228267615661	2,67107821900086	Q96IY1;Q5SY74;Q96IY1-2;Q5SY76	Q96IY1	Kinetochore-associated protein NSL1 homolog	NSL1
-0.107801780104637	0.0321841984987259	-0.0884897038340569	-0.248865738511086	-0.654146730899811	-0.646515011787415	-1.04709148406982	-0.384202808141708	+	5%_21%	Keep	Discard	+_Keep	+_Discard	6	6	6	34389	0	66206	280151936	108002230	2,59394574165344	2,59394574165344	2,10288773859672	0,579745752736926	3,91019326302452	P78549;P78549-3;P78549-2;H3BRL9;H3BPD5;H3BUV2	P78549;P78549-3;P78549-2;H3BRL9;H3BPD5	Endonuclease III-like protein 1	NTHL1
-0.192945823073387	-0.030762417241931	0.0976819023489952	0.0313007459044456	-0.173764735460281	-1.79584383964539	-0.96446967124939	-1.00611865520477	+	5%_21%	Keep	Discard	+_Keep	+_Discard	9	9	9	40822	0	11781	324159152	91791539,75	3,53147125244141	3,53147125244141	1,53640398913417	0,961367827374488	2,85265806768086	Q8IVD9	Q8IVD9	NudC domain-containing protein 3	NUDCD3
-0.715418815612793	-0.685837388038635	-0.888298213481903	-0.750800371170044	-0.885178804397583	-1.10177886486053	-1.89983880519867	-1.58688759803772	+	5%_21%	Keep	Discard	+_Keep	+_Discard	9	9	9	11667	0	54077	84808770	35791390,75	2,36952972412109	2,36952972412109	1,38866669561631	0,608332321047783	2,59632628257314	O75665;O75665-3;A6NF31;A0A0A0MS89;O75665-2	O75665;O75665-3;A6NF31	Oral-facial-digital syndrome 1 protein	OFD1
-0.746729135513306	-1.04776227474213	-0.741463840007782	-1.07495093345642	-1.42987394332886	-2.40368604660034	-2.26412153244019	-1.11899185180664	+	5%_21%	Keep	Discard	+_Keep	+_Discard	6	6	6	48842	0	10258	68195613	20440665,25	3,3362717628479	3,3362717628479	1,4824862785046	0,901441797614098	2,7583897154337	Q9NWU1;Q9NWU1-2;C9J2G3;C9JQQ2;F8VNS3	Q9NWU1;Q9NWU1-2;C9J2G3;C9JQQ2	3-oxoacyl-[acyl-carrier-protein] synthase, mitochondrial	OXSM
-1.37432181835175	-1.16581249237061	-1.32222032546997	-0.722945272922516	-1.63356876373291	-1.46104562282562	-1.60030078887939	-1.61241686344147	+	5%_21%	Keep	Discard	+_Keep	+_Discard	4	4	4	64339	0	1013	46746622	19916320,75	2,34715175628662	2,34715175628662	1,51397958478832	0,430508032441139	2,81334495456101	Q8TE04;Q8TE04-3;Q8TE04-2;Q8TE04-4	Q8TE04;Q8TE04-3;Q8TE04-2;Q8TE04-4	Pantothenate kinase 1	PANK1
-0.273774117231369	-0.306858658790588	-0.356856465339661	-0.21657557785511	-2.15935587882996	-1.93482828140259	-0.757420182228088	-0.545607686042786	+	5%_21%	Keep	Discard	+_Keep	+_Discard	11	11	11	80058	0	25629	197859920	58817620,5	3,36395668983459	3,36395668983459	1,38772236168803	1,06078680232167	2,59470674266423	P05165;P05165-2;P05165-3;H0Y5U0;Q5JTW6;Q5JVH2;H0Y4B9	P05165;P05165-2;P05165-3	Propionyl-CoA carboxylase alpha chain, mitochondrial	PCCA
0.762774288654327	0.74653023481369	0.712077081203461	0.850410759449005	-0.480972856283188	-0.460546433925629	-0.45807734131813	0.741575539112091	+	5%_21%	Keep	Discard	+_Keep	+_Discard	22	22	3	70754	0	32331	1333705824	439872988	3,03202486038208	3,03202486038208	1,66000566613124	0,932453364133835	3,07230722890296	Q13492;Q13492-3;Q13492-2;Q13492-5;E9PKP6;E9PLJ8;H0YCY1;E9PK13;E9PJT1;O60641;E5RFU0;E5RHK9;E5RFC6;E5RK51;E5RIJ5;E5RGY9;E9PDG8;O60641-3;O60641-4	Q13492;Q13492-3;Q13492-2;Q13492-5	Phosphatidylinositol-binding clathrin assembly protein	PICALM
-0.610640704631805	-0.587335109710693	-0.524730026721954	-0.533138513565063	-0.888404786586761	-0.797206401824951	-0.893649697303772	-0.700639367103577	+	5%_21%	Keep	Discard	+_Keep	+_Discard	11	11	11	10581	0	51252	120240000	78160029	1,53838217258453	1,53838217258453	2,65895305559311	0,256013974547386	5,11308891231417	O95427;K7ESH9;K7EQG0;K7EQ07;K7EMD7;K7EID9;K7EPN0;K7ERX5;K7EL34;K7EK83;K7EPJ2;K7ELE1	O95427	GPI ethanolamine phosphate transferase 1	PIGN
-0.727706372737885	-0.675179243087769	-0.445638597011566	-0.42702379822731	-1.13599240779877	-0.906698405742645	-1.09649300575256	-0.790137946605682	+	5%_21%	Keep	Discard	+_Keep	+_Discard	17	16	16	70253	0	68634	122408822	59867053	2,044677734375	2,044677734375	1,98792197710998	0,413443438708782	3,68397521318091	Q14651;C9JAM8;C9J359;C9J0F3;C9JAM3;C9JVY2;C9JU08;C9JYI1	Q14651	Plastin-1	PLS1
-0.699101448059082	-1.01174688339233	-1.09736824035645	-0.759566307067871	-2.26947498321533	-1.35338640213013	-1.38091087341309	-1.25971114635468	+	5%_21%	Keep	Discard	+_Keep	+_Discard	9	8	8	88476	1625	73959	69245442	24948628,75	2,77552103996277	2,77552103996277	1,41660463812753	0,673925131559372	2,64434140770537	Q9NP80;Q9NP80-3;Q9NP80-2;A0A0C4DG51;C9J9W9;C9JAX4	Q9NP80;Q9NP80-3;Q9NP80-2;A0A0C4DG51	Calcium-independent phospholipase A2-gamma	PNPLA8
-1.38609766960144	-0.628827273845673	-0.534466326236725	-0.657473981380463	-2.82510185241699	-0.869531452655792	-2.69122076034546	-1.8663375377655	+	5%_21%	Keep	Discard	+_Keep	+_Discard	4	4	4	32193	15931	66521	90358650,5	21922986,25	4,12163972854614	4,12163972854614	1,37029017418337	1,26133158802986	2,56484945882648	Q8IY26	Q8IY26	Presqualene diphosphate phosphatase	PPAPDC2
-0.0507327057421207	-0.000603831722401083	0.00296590616926551	-0.00580801023170352	-0.181414470076561	-0.579878568649292	-0.190834984183311	-0.224729150533676	+	5%_21%	Keep	Discard	+_Keep	+_Discard	23	23	4	98543	0	15516	324307864	206473508	1,57069969177246	1,57069969177246	1,56825192182335	0,28066963297897	2,90876413080293	Q8ND30;E9PP16;Q8ND30-3;E9PIK8;E9PMH3;E9PJA0;E9PK17;H0YDM0;H0YDJ2;E9PMN3;H0YET1;F5GZP6;E9PI79;H0YFE4	Q8ND30;E9PP16;Q8ND30-3	Liprin-beta-2	PPFIBP2
0.121776275336742	0.0564881190657616	0.0726843699812889	0.0341026596724987	-0.667017221450806	-0.389819860458374	-0.272996693849564	0.0627176463603973	+	5%_21%	Keep	Discard	+_Keep	+_Discard	18	18	2	84681	0	15053	378655152	215752740	1,75504219532013	1,75504219532013	1,36104443520729	0,388041888363659	2,54904317736283	Q9BZL4-3;Q9BZL4-4;K7EL81;Q9BZL4-5;Q9BZL4-2;K7ER83	Q9BZL4-3;Q9BZL4-4;K7EL81;Q9BZL4-5;Q9BZL4-2	Protein phosphatase 1 regulatory subunit 12C	PPP1R12C
0.368126153945923	0.494438946247101	0.418562769889832	0.485201150178909	-0.328445225954056	0.00244229496456683	-0.258906811475754	-0.329893887042999	+	5%_21%	Keep	Discard	+_Keep	+_Discard	13	13	9	41564	0	13487	739495392	230234196	3,21192693710327	3,21192693710327	3,6785593603633	0,670283162442502	7,95710206027092	Q15435;H7C003;C9JD73;Q15435-2;Q15435-3;B5MBZ8;C9J177;Q15435-5;Q15435-4;C9JRC4;H7C3Q5	Q15435;H7C003;C9JD73;Q15435-2;Q15435-3;B5MBZ8;C9J177	Protein phosphatase 1 regulatory subunit 7	PPP1R7
1.70158183574677	1.80411875247955	1.83400642871857	1.86944150924683	1.8615745306015	0.634225726127625	0.613809704780579	0.584546267986298	+	5%_21%	Keep	Discard	+_Keep	+_Discard	25	25	1	47352	0	32331	8654113920	3141329840	2,7549204826355	2,7549204826355	1,50082462658222	0,878748074173927	2,79035391777916	R4GNH3;E9PN50	R4GNH3;E9PN50		PSMC3
-0.220574408769608	0.00506515754386783	-0.0402355194091797	-0.0537066459655762	-0.490843176841736	-0.396408319473267	-0.387313902378082	-0.541867733001709	+	5%_21%	Keep	Discard	+_Keep	+_Discard	5	5	5	24906	0	3323	291814120	149657962	1,9498735666275	1,9498735666275	3,04570469536714	0,376745428773575	6,07944395787414	Q9P2W1;Q9P2W1-2;K7ELD8;K7EK12;K7EQS1;K7ERB6;Q9P2W1-3	Q9P2W1;Q9P2W1-2;K7ELD8;K7EK12;K7EQS1	Homologous-pairing protein 2 homolog	PSMC3IP
1.76252830028534	1.83520865440369	1.7877858877182	1.78526020050049	0.655970990657806	0.654642403125763	1.86253821849823	0.622828423976898	+	5%_21%	Keep	Discard	+_Keep	+_Discard	16	16	16	42945	0	32331	8462854912	3218638288	2,62932777404785	2,62932777404785	1,48702689776059	0,843700751662254	2,76629493561606	Q9UNM6;A0A087WUL9;Q9UNM6-2;J3KNQ3;E9PL38;H0YD73;E9PQG3;E9PPD2;F8W8J6	Q9UNM6;A0A087WUL9;Q9UNM6-2;J3KNQ3;E9PL38	26S proteasome non-ATPase regulatory subunit 13	PSMD13
0.0976608172059059	0.044979814440012	0.213782742619514	0.00258314609527588	-0.996318459510803	-0.273539066314697	-0.261566132307053	-0.159532189369202	+	5%_21%	Keep	Discard	+_Keep	+_Discard	10	10	10	3336	0	32331	395651400	183252088	2,15905523300171	2,15905523300171	1,38222851490753	0,512490591965616	2,58528909906596	P32322;E2QRB3;P32322-2;J3KQ22;P32322-3;J3QL24;J3QLK9;J3QL32;J3KTA8;J3QKT3;J3QRZ0;J3QR88;J3QL23;J3QKT4;J3KSA9	P32322;E2QRB3;P32322-2;J3KQ22;P32322-3;J3QL24;J3QLK9;J3QL32;J3KTA8;J3QKT3;J3QRZ0	Pyrroline-5-carboxylate reductase 1, mitochondrial;Pyrroline-5-carboxylate reductase	PYCR1
-0.490734100341797	-0.495906114578247	-0.769532740116119	-0.622388482093811	-1.2127730846405	-0.845128834247589	-1.86063659191132	-0.894035875797272	+	5%_21%	Keep	Discard	+_Keep	+_Discard	5	5	5	24841	0	93461	115602672	48096227,75	2,40357041358948	2,40357041358948	1,33530469324096	0,608503237366676	2,50514308931333	P51157;P51157-3;P51157-2;Q8WVF3;H0Y9S6;H0Y9G4;H0Y927	P51157;P51157-3;P51157-2	Ras-related protein Rab-28	RAB28
-0.672147929668427	-0.761649787425995	-0.704719185829163	-0.531624138355255	-0.999738991260529	-0.997082352638245	-1.08601927757263	-0.83601576089859	+	5%_21%	Keep	Discard	+_Keep	+_Discard	4	4	4	38457	0	16102	100574108	58829045	1,70959961414337	1,70959961414337	2,32367601583831	0,312178835272789	4,36475200708615	Q96B01;H0YGT5;Q96B01-2;F5H1Y0;Q96B01-3;H0YFK6;F5H4V6;F5H031;F5H710	Q96B01;H0YGT5;Q96B01-2;F5H1Y0;Q96B01-3	RAD51-associated protein 1	RAD51AP1
-0.577146887779236	-0.585683047771454	-0.52532285451889	-0.47024017572403	-1.04251778125763	-0.896706700325012	-1.08084666728973	-0.93139111995697	+	5%_21%	Keep	Discard	+_Keep	+_Discard	5	1	1	20615	25801	24159	125755726	57634237	2,18196225166321	2,18196225166321	3,90170108971485	0,448267325758934	8,72443370245051	P10114;F6U784	P10114;F6U784	Ras-related protein Rap-2a	RAP2A
0.408097952604294	0.53893631696701	0.382840424776077	0.456249505281448	-0.705711007118225	-0.577487468719482	-0.288834482431412	0.350421041250229	+	5%_21%	Keep	Discard	+_Keep	+_Discard	6	3	2	20745	16375	77246	747137440	267208402	2,79608511924744	2,79608511924744	1,7093408408349	0,75193402916193	3,16149217464834	Q9Y3L5;A0A087X2C3	Q9Y3L5	Ras-related protein Rap-2c	RAP2C
1.46342504024506	1.3591502904892	1.3224903345108	1.11253213882446	0.863963544368744	0.733400642871857	0.794965267181396	0.638113379478455	+	5%_21%	Keep	Discard	+_Keep	+_Discard	7	7	7	1717	0	28799	3660394304	1328174368	2,75595927238464	2,75595927238464	3,14152485676989	0,556788742542267	6,33836919282085	P98179	P98179	RNA-binding protein 3	RBM3
-0.575360655784607	-0.617982029914856	-0.697971165180206	-0.705377042293549	-0.934546530246735	-1.21613144874573	-1.09519994258881	-0.779132664203644	+	5%_21%	Keep	Discard	+_Keep	+_Discard	2	2	2	44505	71736	35173	103379128	57838990	1,78736042976379	1,78736042976379	1,92409583180538	0,357079923152924	3,56120756209943	P29558;E7ETU5;F6Y5H0;P29558-2;Q15434;Q6XE24;E7EPF2;C9J9B2;F8VV01;F8W1T6;C9JIJ9;Q6XE24-3;Q6XE24-4;Q6XE24-5;Q6XE24-2	P29558;E7ETU5;F6Y5H0;P29558-2;Q15434;Q6XE24;E7EPF2;C9J9B2;F8VV01;F8W1T6;C9JIJ9;Q6XE24-3;Q6XE24-4;Q6XE24-5;Q6XE24-2	RNA-binding motif, single-stranded-interacting protein 1;RNA-binding motif, single-stranded-interacting protein 2;RNA-binding motif, single-stranded-interacting protein 3	RBMS1;RBMS2;RBMS3
0.532334208488464	0.576820969581604	0.265291422605515	0.495382219552994	0.248272389173508	0.222590789198875	0.186985105276108	0.191922917962074	+	5%_21%	Keep	Discard	+_Keep	+_Discard	7	3	3	22006	0	18643	787800352	493814048	1,59533798694611	1,59533798694611	1,94342226528337	0,255014404654503	3,59817691374746	P08134;Q5JR08;E9PQH6;Q5JR07;Q5JR05;Q5JR06;E9PN11;U3KQA9;U3KQV3;E9PLA2	P08134;Q5JR08;E9PQH6;Q5JR07;Q5JR05	Rho-related GTP-binding protein RhoC	RHOC
1.80468285083771	1.87245953083038	1.85098433494568	0.679007768630981	0.67144238948822	0.666262209415436	0.67238461971283	0.612021505832672	+	5%_21%	Keep	Discard	+_Keep	+_Discard	26	26	3	26688	0	26589	7247482944	1095913632	6,61318826675415	6,61318826675415	1,66052196522389	0,896255940198898	3,07323588148047	P23396;P23396-2;E9PL09;E9PPU1;H0YCJ7;H0YF32;H0YEU2;E9PQ96;E9PJH4;E9PK82;E9PQX2;H0YES8	P23396;P23396-2;E9PL09;E9PPU1;H0YCJ7;H0YF32;H0YEU2	40S ribosomal protein S3	RPS3
-0.0894027575850487	-0.151108011603355	-0.167940050363541	-0.164663270115852	-0.83640992641449	-0.764176189899445	-1.42462170124054	-0.562272250652313	+	5%_21%	Keep	Discard	+_Keep	+_Discard	3	3	3	27939	15763	62583	256923412	77670187,5	3,30787682533264	3,30787682533264	2,17152472266578	0,753591494634748	4,04855504503456	Q9H446;E5RGQ3;Q9H446-2;E5RGS5;E5RJE3	Q9H446;E5RGQ3;Q9H446-2;E5RGS5	RWD domain-containing protein 1	RWDD1
1.69293415546417	1.78105247020721	1.77499735355377	1.73119056224823	1.58837270736694	0.424400180578232	-0.656313002109528	0.366241365671158	+	5%_21%	Keep	Discard	+_Keep	+_Discard	11	11	1	17561	0	32331	7773210112	1821331182	4,26787281036377	4,26787281036377	1,54165774879896	1,31436832249165	2,8618912658393	O00422	O00422	Histone deacetylase complex subunit SAP18	SAP18
1.73492455482483	1.71363568305969	1.82160329818726	1.76904952526093	1.49273800849915	1.47167718410492	1.52184081077576	1.3354697227478	+	5%_21%	Keep	Discard	+_Keep	+_Discard	21	21	21	58777	0	32331	7993328384	4650389440	1,71885144710541	1,71885144710541	3,16514119722714	0,30437183380127	6,40347122126863	P49591;Q5T5C7	P49591;Q5T5C7	Serine--tRNA ligase, cytoplasmic	SARS
0.748295187950134	0.776099622249603	0.747972965240479	0.802204430103302	-0.430451095104218	-0.385843604803085	-0.427788645029068	0.885445654392242	+	5%_21%	Keep	Discard	+_Keep	+_Discard	32	32	10	10993	0	32331	1331156608	548256592	2,42798113822937	2,42798113822937	1,41248083959139	0,858302474021912	2,63724157799535	Q15020;Q15020-4;Q15020-2;F8W667;H0YHU8;F8VVK9;F8VZM2;Q15020-3	Q15020;Q15020-4	Squamous cell carcinoma antigen recognized by T-cells 3	SART3
0.602178275585175	0.435459524393082	0.503214418888092	0.722709000110626	0.280668646097183	0.315223127603531	0.283176511526108	0.315311074256897	+	5%_21%	Keep	Discard	+_Keep	+_Discard	3	3	3	41522	0	32297	940123824	577005248	1,62931597232819	1,62931597232819	2,25860999957738	0,267295464873314	4,2278813581442	O00767	O00767	Acyl-CoA desaturase	SCD
-0.207610353827477	-0.392205625772476	-0.440280616283417	-0.558777093887329	-1.7816755771637	-1.51820921897888	-1.53028953075409	-1.29974389076233	+	5%_21%	Keep	Discard	+_Keep	+_Discard	7	7	7	48148	0	18263	166079656	22638108,75	7,3362865447998	7,3362865447998	4,04201103222303	1,13276113197207	9,23921136747279	Q96I15;A0A0A0MQU4;H7C3V9;H7C277;Q96I15-2;H7C1N7;H7C1S7;H7C4A1;H7C280;C9JNL5	Q96I15;A0A0A0MQU4;H7C3V9;H7C277;Q96I15-2	Selenocysteine lyase	SCLY
1.05075395107269	1.17844212055206	1.15474116802216	1.19361698627472	0.900623261928558	0.893924832344055	0.871320307254791	0.907152414321899	+	5%_21%	Keep	Discard	+_Keep	+_Discard	9	9	3	31629	0	72987	2633719488	1681393760	1,56639063358307	1,56639063358307	3,56075423439897	0,251133352518082	7,5757706528957	P21912	P21912	Succinate dehydrogenase [ubiquinone] iron-sulfur subunit, mitochondrial	SDHB
0.535853207111359	0.581040322780609	0.568558275699615	0.782498419284821	0.447985738515854	0.277097970247269	0.433627247810364	0.328405320644379	+	5%_21%	Keep	Discard	+_Keep	+_Discard	5	1	1	11986	1	-2	1026783792	662498288	1,5498663187027	1,5498663187027	1,90467867807381	0,245208486914635	3,5242396986625	H0YNX5;P67812-2;H0YNA5;P0C7V7	H0YNX5;P67812-2;H0YNA5	Signal peptidase complex catalytic subunit SEC11;Signal peptidase complex catalytic subunit SEC11A;Signal peptidase I	SEC11A
-0.364284962415695	0.000215631473110989	-0.0855014398694038	0.0319277681410313	-0.405139237642288	-0.350332796573639	-0.664837658405304	-0.489674299955368	+	5%_21%	Keep	Discard	+_Keep	+_Discard	15	15	1	81249	0	10096	284354592	145569974	1,95338773727417	1,95338773727417	1,78089497835144	0,373085247476411	3,29251726372679	Q92503;Q92503-2;K7EJ08;K7ELU0;K7ERB3;K7ESI4;K7EQK4;K7EIJ7;D5G3K4;K7EJJ2;K7EPE4	Q92503;Q92503-2;K7EJ08	SEC14-like protein 1	SEC14L1
1.32201969623566	1.30971932411194	1.16126048564911	1.30862593650818	0.944174289703369	1.09300971031189	0.924992620944977	0.916156470775604	+	5%_21%	Keep	Discard	+_Keep	+_Discard	21	21	20	42741	0	17254	3342675200	1940967072	1,72216999530792	1,72216999530792	2,78706309504604	0,305823087692261	5,41998649886241	P30740;P30740-2	P30740	Leukocyte elastase inhibitor	SERPINB1
-0.366963237524033	-0.183129206299782	-0.181538358330727	-0.221577897667885	-0.765205502510071	-0.519109725952148	-0.358230859041214	-0.720014572143555	+	5%_21%	Keep	Discard	+_Keep	+_Discard	6	6	6	33429	0	14448	217832804	121650088	1,7906506061554	1,7906506061554	1,83471734752539	0,352337989956141	3,39245500662502	Q96EQ0;D6RFW1	Q96EQ0;D6RFW1	Small glutamine-rich tetratricopeptide repeat-containing protein beta	SGTB
-0.154825493693352	0.316208243370056	-0.366529524326324	-0.181085407733917	-0.575332641601563	-0.521259784698486	-0.586624622344971	-0.668607950210571	+	5%_21%	Keep	Discard	+_Keep	+_Discard	22	22	22	73125	0	1958	310649928	117276730	2,64886236190796	2,64886236190796	1,78888736128246	0,491398204118013	3,30728071317561	Q96B97;Q96B97-2;Q5JPT2;Q96B97-3;Q5VSN0;Q5JPT1;Q5JPT3	Q96B97;Q96B97-2;Q5JPT2;Q96B97-3;Q5VSN0	SH3 domain-containing kinase-binding protein 1	SH3KBP1
-1.38670825958252	-0.889329612255096	-1.58949196338654	-2.09072422981262	-2.91904640197754	-2.23827314376831	-2.20283317565918	-2.31595325469971	+	5%_21%	Keep	Discard	+_Keep	+_Discard	5	5	5	19308	23275	25736	29953438	4909810	6,10073280334473	6,10073280334473	1,6734879128537	0,929962977766991	3,09658940532836	Q149N8;A0A0D9SFM0;Q149N8-4;Q149N8-2;H0YBI0;H7C2W2;K4DI94;Q149N8-5	Q149N8;A0A0D9SFM0;Q149N8-4;Q149N8-2	E3 ubiquitin-protein ligase SHPRH	SHPRH
-0.591850996017456	-1.23463571071625	-0.992894649505615	-0.7212815284729	-2.54649424552917	-1.71891927719116	-1.09171068668365	-1.82396304607391	+	5%_21%	Keep	Discard	+_Keep	+_Discard	13	13	13	13306	0	31076	73914075	19790594,75	3,73480820655823	3,73480820655823	1,47868947304424	0,910106092691422	2,75178406894111	O75182;O75182-2;M0QYC5;O75182-3;M0R271	O75182;O75182-2;M0QYC5	Paired amphipathic helix protein Sin3b	SIN3B
-0.946794867515564	-0.901841580867767	-0.797967910766602	-1.00710570812225	-1.29383838176727	-1.41363251209259	-1.20923912525177	-1.56174325942993	+	5%_21%	Keep	Discard	+_Keep	+_Discard	7	7	7	8013	0	53573	64612680	29307810	2,20462322235107	2,20462322235107	2,68032294943226	0,456185802817345	5,16342657572833	Q96T83;A0A087WXD1	Q96T83;A0A087WXD1	Sodium/hydrogen exchanger 7;Sodium/hydrogen exchanger	SLC9A7
-1.51879692077637	-1.20661687850952	-1.10264611244202	-1.30964815616608	-1.56489384174347	-1.68053460121155	-1.45032405853271	-1.49859392642975	+	5%_21%	Keep	Discard	+_Keep	+_Discard	2	2	2	46752	16692	2886	33944633	21044817,75	1,6129686832428	1,6129686832428	1,38700010983513	0,264159590005875	2,59346822355915	Q92966;Q5T282	Q92966;Q5T282	snRNA-activating protein complex subunit 3	SNAPC3
-1.29432904720306	-1.49159407615662	-1.28060901165009	-1.33722543716431	-1.62602400779724	-1.65029537677765	-1.5950767993927	-1.73712050914764	+	5%_21%	Keep	Discard	+_Keep	+_Discard	7	7	7	67568	0	98012	29359942,5	17277183,75	1,699347615242	1,699347615242	2,72256883855032	0,301189780235291	5,26393563873777	P61764;P61764-2;A0A096LP52	P61764;P61764-2	Syntaxin-binding protein 1	STXBP1
1.80021023750305	1.87517893314362	0.604981482028961	1.87237977981567	0.673349022865295	0.675561189651489	0.651112198829651	0.672014057636261	+	5%_21%	Keep	Discard	+_Keep	+_Discard	5	5	5	11557	0	11059	7256060416	1120773760	6,47415256500244	6,47415256500244	1,5020988329749	0,870178490877151	2,7925785864489	P63165;B8ZZN6;P63165-2;B8ZZ67;B8ZZJ0;B9A032	P63165;B8ZZN6;P63165-2;B8ZZ67	Small ubiquitin-related modifier 1	SUMO1
-0.950859189033508	-0.648271441459656	-0.735066592693329	-0.556395888328552	-2.02610635757446	-0.746127665042877	-1.93626439571381	-1.94689917564392	+	5%_21%	Keep	Discard	+_Keep	+_Discard	4	4	4	3376	71582	34755	92738691	29354642	3,15925121307373	3,15925121307373	1,59724658461138	0,941201120615005	2,96013178789379	Q53S58	Q53S58	Transmembrane protein 177	TMEM177
-1.08446574211121	-1.19524085521698	-0.95160698890686	-1.24692261219025	-2.11009526252747	-1.37260091304779	-1.58794128894806	-1.92617607116699	+	5%_21%	Keep	Discard	+_Keep	+_Discard	16	2	2	26866	2452	24731	45172366	16553772	2,72882628440857	2,72882628440857	1,9101521411813	0,629644334316254	3,53464289556433	H0YJH7	H0YJH7		TMPO
0.399070680141449	0.555713713169098	0.578675508499146	0.738625168800354	0.095296710729599	-0.0165430214256048	-0.000192047911696136	0.071629524230957	+	5%_21%	Keep	Discard	+_Keep	+_Discard	13	13	13	33429	0	92783	946756240	361790328	2,61686444282532	2,61686444282532	3,41061757717116	0,530473476246698	7,11198687600434	Q16762;B1AH48	Q16762	Thiosulfate sulfurtransferase	TST
1.03756415843964	1.01384556293488	0.810590386390686	1.04472768306732	0.697204530239105	0.776899516582489	0.768350005149841	0.542120099067688	+	5%_21%	Keep	Discard	+_Keep	+_Discard	6	1	1	12585	72067	36233	1962407584	1191650912	1,64679729938507	1,64679729938507	1,94576498739584	0,280538409948349	3,60267022295529	K7ES63;K7EK43	K7ES63		TUBB6
-0.336542040109634	-0.469130635261536	-0.622365176677704	-0.715351045131683	-0.962674260139465	-0.882415592670441	-0.938582301139832	-0.92521858215332	+	5%_21%	Keep	Discard	+_Keep	+_Discard	9	9	9	76088	0	5629	130790594	63669175	2,05422163009644	2,05422163009644	2,42777756882083	0,391375459730625	4,58914058230947	Q9UGJ1;Q9UGJ1-2;H3BPU4;H3BS59;H3BQ12;H3BN56;H3BNL9	Q9UGJ1;Q9UGJ1-2;H3BPU4	Gamma-tubulin complex component 4	TUBGCP4
-0.0514004416763783	-0.152227193117142	-0.213319972157478	-0.0552406646311283	-0.282933682203293	-0.390686392784119	-0.415286004543304	-0.393654465675354	+	5%_21%	Keep	Discard	+_Keep	+_Discard	16	16	16	2005	0	77838	270131724	173396224	1,55788695812225	1,55788695812225	2,6603302367465	0,252593068405986	5,11632281069948	Q96RT7;Q96RT7-3;Q96RT7-2;E7EQL8;H7C2H5;H7C358	Q96RT7;Q96RT7-3;Q96RT7-2;E7EQL8	Gamma-tubulin complex component 6	TUBGCP6
0.811258792877197	0.96492999792099	0.882490277290344	0.928532540798187	-0.533396065235138	-1.77944481372833	-0.510728895664215	0.787530064582825	+	5%_21%	Keep	Discard	+_Keep	+_Discard	30	30	30	11797	0	28291	1684323936	428737517,25	3,92856693267822	3,92856693267822	1,43566613496325	1,40581282973289	2,67721704794781	A0AVT1;A0AVT1-2;H0Y8S8;A0AVT1-3;A0AVT1-4;H0Y9U5	A0AVT1;A0AVT1-2	Ubiquitin-like modifier-activating enzyme 6	UBA6
1.28454875946045	1.44934749603271	1.47756290435791	1.35071802139282	-1.39634847640991	1.17689096927643	-0.204098597168922	-0.176457822322845	+	5%_21%	Keep	Discard	+_Keep	+_Discard	9	9	9	19509	0	13048	4129900224	815570185	5,06381988525391	5,06381988525391	1,57427336733536	1,54054777696729	2,91940889213168	P62253;I3L0Q0;I3L2Q4;I3L2H7;K7EPR7	P62253;I3L0Q0;I3L2Q4	Ubiquitin-conjugating enzyme E2 G1;Ubiquitin-conjugating enzyme E2 G1, N-terminally processed	UBE2G1
0.187457010149956	0.105074755847454	0.111386120319366	0.0838284119963646	-0.163427397608757	-0.357391506433487	-0.502696633338928	-0.13585738837719	+	5%_21%	Keep	Discard	+_Keep	+_Discard	13	13	13	89984	0	49023	415274360	207401180	2,00227570533752	2,00227570533752	2,43774337071207	0,411779806017876	4,610982688422	Q96PU4;Q96PU4-2;A0A0A0MSQ3;B1AL33	Q96PU4;Q96PU4-2	E3 ubiquitin-protein ligase UHRF2	UHRF2
-1.92117929458618	-1.226806640625	-0.535768866539001	-1.8528219461441	-2.17560839653015	-2.62853598594666	-3.34492826461792	-1.87274312973022	+	5%_21%	Keep	Discard	+_Keep	+_Discard	10	9	9	97775	0	21555	46924208	5589740	8,39470291137695	8,39470291137695	1,31215337177562	1,12130975723267	2,46578281338325	Q9UKW4;Q9UKW4-4;Q9UKW4-2;H0YDG2;Q9UKW4-3	Q9UKW4;Q9UKW4-4;Q9UKW4-2;H0YDG2	Guanine nucleotide exchange factor VAV3	VAV3
-0.802311718463898	-0.937831461429596	-0.671758592128754	-1.04818952083588	-1.17515027523041	-1.10302031040192	-1.19564092159271	-0.985071063041687	+	5%_21%	Keep	Discard	+_Keep	+_Discard	2	2	2	30947	43567	38194	72388862	46059467	1,57163918018341	1,57163918018341	1,41458053557735	0,24969781935215	2,64085601571755	Q14135;G5E9M7;G5E9M9;A0A075B6E4;A0A0A6YYI5;Q14135-5;Q14135-6;Q14135-2;Q14135-4;F8W708;E7ERW0;E7EQU6;E7EWF5	Q14135;G5E9M7;G5E9M9;A0A075B6E4;A0A0A6YYI5;Q14135-5;Q14135-6;Q14135-2;Q14135-4;F8W708;E7ERW0;E7EQU6;E7EWF5	Transcription cofactor vestigial-like protein 4	VGLL4
-0.668853223323822	-0.692146718502045	-0.757079541683197	-0.942421913146973	-1.79186499118805	-2.01042127609253	-0.783882856369019	-2.08412933349609	+	5%_21%	Keep	Discard	+_Keep	+_Discard	4	4	4	35891	0	19713	85068418	28042543,5	3,03354835510254	3,03354835510254	1,58381267012966	0,902449265122414	2,93629708520846	Q9H977;B9A049;C9J016	Q9H977;B9A049;C9J016	WD repeat-containing protein 54	WDR54
-0.521522521972656	-0.433701455593109	-0.613334894180298	-0.383488059043884	-0.506184160709381	-0.781462430953979	-0.848945319652557	-0.924920678138733	+	5%_21%	Keep	Discard	+_Keep	+_Discard	3	3	3	11953	98996	31896	138860176	88034362	1,57734072208405	1,57734072208405	1,42506040918189	0,277366414666176	2,65891334419481	Q9C0D4	Q9C0D4	Zinc finger protein 518B	ZNF518B
-0.39838495850563	-0.117942772805691	-0.363964885473251	0.253937989473343	-0.349687427282333	-1.49345099925995	-1.33531272411346	-1.01170563697815	+	5%_21%	Keep	Discard	+_Keep	+_Discard	11	11	11	54271	0	47983	279811840	70690042	3,95829224586487	3,95829224586487	1,63326032048319	0,890950540080667	3,02433281214667	Q969S3	Q969S3	Zinc finger protein 622	ZNF622
-0.263960391283035	-0.303005486726761	-0.678152143955231	-0.178947702050209	-0.436914026737213	-1.81273829936981	-1.76914954185486	-1.90732657909393	+	5%_21%	Keep	Discard	+_Keep	+_Discard	2	1	1	49984	1	-2	183236292	46302466,75	3,95737624168396	3,95737624168396	1,65953943473913	1,12551568076015	3,07146871521868	Q5FWF6;F8WEN0;C9JUE3;C9J3R7;C9J487;Q5FWF6-3	Q5FWF6;F8WEN0;C9JUE3;C9J3R7;C9J487;Q5FWF6-3	Zinc finger protein 789	ZNF789

## Sheet: Ri-1 down-regulated 5%
Column1	Column2	Column3	Column4	Column5	Column6	Column7	Column8	Column9	Column10	Column11	Column12	Column13	Column14	Column15	Column16	Column17	Column18	Column19	Column20	Column21	Column22	Column23	Column23A	Column24	Column25	Column26	Column27	Column28	Column29	Column30
Ri-1.5%.1	Ri-1.5%.2	Ri-1.5%.3	Ri-1.5%.4	Ri-1.21%.1	Ri-1.21%.2	Ri-1.21%.3	Ri-1.21%.4	Student's T-test Significant 5%_21%	Student's T-test significant	x>=1.5	x<=0.66	Student's T-test Significant 5%_21%_x>=1.5	Student's T-test Significant 5%_21%_x<=0.66	Peptides	Razor + unique peptides	Unique peptides	Mol. weight [kDa]	Q-value	Score	5%	21%	5%_x/y_21%	fold change	-Log Student's T-test p-value 5%_21%	Student's T-test Difference 5%_21%	Student's T-test Test statistic 5%_21%	Protein IDs	Majority protein IDs	Protein names	Gene names
-0.339929819107056	-0.35808277130127	-0.285870045423508	-0.812247812747955	-0.203405618667603	0.479808628559113	0.174793601036072	0.321016848087311	+	5%_21%	Discard	Keep	+_Discard	+_Keep	7	7	7	45069	0	13662	157897034	525221708	0,300629317760468	-3.32636	1,82430483139636	-0,64208597689867	-3,37302511901061	Q9UKU7;Q9UKU7-2;Q9UKU7-3	Q9UKU7;Q9UKU7-2;Q9UKU7-3	Isobutyryl-CoA dehydrogenase, mitochondrial	ACAD8
-0.912673592567444	-0.638032913208008	-0.850923299789429	0.244180500507355	0.256897658109665	0.318392038345337	0.291783362627029	0.355851799249649	+	5%_21%	Discard	Keep	+_Discard	+_Keep	17	2	2	14522	0	24844	186726064	586008720	0,318640440702438	-3.13833	1,70136108117376	-0,845093540847301	-3,14700472129038	K7EM38	K7EM38		ACTG1
0.643753051757813	0.625828623771667	0.477949917316437	1.88162624835968	1.72184526920319	1.75804364681244	1.77534556388855	1.76443374156952	+	5%_21%	Discard	Keep	+_Discard	+_Keep	16	16	16	4476	0	32331	3182823280	7928001664	0,401466012001038	-2.49087	1,38575066384401	-0,847627595067024	-2,59132597379549	P61160;P61160-2;F5H6T1	P61160;P61160-2;F5H6T1	Actin-related protein 2	ACTR2
0.31906259059906	0.369835197925568	0.371033012866974	-0.204966187477112	0.690816640853882	0.915843963623047	1.08513033390045	0.401051223278046	+	5%_21%	Discard	Keep	+_Discard	+_Keep	7	1	1	15278	1	-2	530998532	1489800576	0,356422543525696	-2.80566	1,47484718470535	-0,559469386935234	-2,7451035244681	A0A096LPA2	A0A096LPA2		ADSL
-0.730386078357697	-1.05056500434875	-0.906360149383545	-1.02288627624512	-0.766644418239594	-0.650755941867828	-0.57196968793869	-0.748664438724518	+	5%_21%	Discard	Keep	+_Discard	+_Keep	7	7	7	13142	0	14494	64151464	99331776	0,64583021402359	-1.54839	1,52617781339244	-0,243040755391121	-2,83471088437594	P51825;P51825-2;P51825-3;F5GXF9	P51825;P51825-2;P51825-3;F5GXF9	AF4/FMR2 family member 1	AFF1
-1.24287748336792	-1.46039092540741	1.14813578128815	-1.12963020801544	1.2293598651886	1.2963103055954	1.213996052742	1.24976491928101	+	5%_21%	Discard	Keep	+_Discard	+_Keep	11	11	11	18867	0	11235	698079174	3181530432	0,219416156411171	-4.55755	1,69871228200479	-1,91854849457741	-3,14220113449845	Q9Y4K1;Q9Y4K1-2	Q9Y4K1	Absent in melanoma 1 protein	AIM1
1.31026136875153	1.44487953186035	1.30417764186859	1.55025970935822	1.7628128528595	1.72507405281067	1.58861315250397	1.50038373470306	+	5%_21%	Discard	Keep	+_Discard	+_Keep	10	6	5	20529	0	7298	4245090816	6585346560	0,644626796245575	-1.55129	1,53686850934663	-0,241826385259628	-2,85347408703994	P84085;C9J1Z8;F8WDB3	P84085;C9J1Z8	ADP-ribosylation factor 5	ARF5
-0.257314532995224	-0.389957785606384	-0.387238472700119	-0.340292811393738	-0.392210453748703	0.116890236735344	0.286390602588654	0.186844646930695	+	5%_21%	Discard	Keep	+_Discard	+_Keep	8	8	8	32054	0	21666	179476140	406961080	0,441015481948853	-2.26749	1,35938037199609	-0,393179658800364	-2,5462004679845	Q7L266;Q7L266-2;A0A087WUG3;E9PJK6;A0A087WZI5	Q7L266;Q7L266-2	Isoaspartyl peptidase/L-asparaginase;Isoaspartyl peptidase/L-asparaginase alpha chain;Isoaspartyl peptidase/L-asparaginase beta chain	ASRGL1
0.761033475399017	0.681666195392609	0.473055303096771	0.743144094944	0.928457379341125	1.05629301071167	0.867900013923645	0.97046685218811	+	5%_21%	Discard	Keep	+_Discard	+_Keep	5	5	5	1749	0	20273	1123503552	1893681888	0,593290567398071	-1.68551	2,03589933544348	-0,291054546833038	-3,7775634957862	P30049;A0A087WTL3	P30049	ATP synthase subunit delta, mitochondrial	ATP5D
-1.09772443771362	-0.645215094089508	-0.224850103259087	-1.57979393005371	0.624361574649811	0.397877067327499	0.513109087944031	0.506071448326111	+	5%_21%	Discard	Keep	+_Discard	+_Keep	6	6	6	26907	0	53677	98643100	852302720	0,115737169981003	-8.64027	2,49173826107252	-1,39725068584085	-4,73045542671255	A0A087WSV0;Q9HB09;M0QZM6;I6LJZ7;Q9HB09-3;M0R1Z8;M0R1K0;I6LJZ9;I6LK00;Q9HB09-2	A0A087WSV0;Q9HB09;M0QZM6;I6LJZ7;Q9HB09-3;M0R1Z8	Bcl-2-like protein 12	BCL2L12
-0.488554954528809	-0.811610698699951	0.482383400201797	-0.596876740455627	0.553831100463867	0.348652601242065	0.488081753253937	0.330997914075851	+	5%_21%	Discard	Keep	+_Discard	+_Keep	10	10	10	38157	0	44492	284421696	739642384	0,384539484977722	-2.60051	1,44176420994227	-0,784055590629578	-2,68775496478216	Q02338;E9PCG9;C9K0G7;H7C2W1;A0A0G2JRH6;C9JM78;C9JQ90;A0A0G2JRX6	Q02338;E9PCG9;C9K0G7;H7C2W1;A0A0G2JRH6;C9JM78;C9JQ90;A0A0G2JRX6	D-beta-hydroxybutyrate dehydrogenase, mitochondrial	BDH1
-1.00078105926514	-0.833368539810181	-0.784040093421936	-0.718648731708527	-0.727005660533905	-0.519736707210541	-0.516829073429108	-0.485155701637268	+	5%_21%	Discard	Keep	+_Discard	+_Keep	6	6	6	41036	0	12132	74794861	124752116	0,599547863006592	-1.66792	1,79560411403581	-0,27202782034874	-3,31970831892983	Q9BUA3;H0YGK9;H0YGY5	Q9BUA3	Uncharacterized protein C11orf84	C11orf84
-2.02810144424438	-1.94260883331299	-1.00007367134094	-1.07490217685699	-0.513505339622498	-0.87587296962738	-0.391798228025436	-0.636423110961914	+	5%_21%	Discard	Keep	+_Discard	+_Keep	7	7	7	66926	0	33508	30301642	119064288	0,254498153924942	-3.9293	1,67054577138975	-0,90702161937952	-3,09128476218717	Q7Z3D6-2;Q7Z3D6;H0YB09;Q7Z3D6-4;Q7Z3D6-3;H0YB62;Q7Z3D6-5;H0YB11;A0A0C4DGD4;A0A0C4DGD8;E5RJ62;E5RIU5	Q7Z3D6-2;Q7Z3D6;H0YB09;Q7Z3D6-4;Q7Z3D6-3;H0YB62;Q7Z3D6-5	UPF0317 protein C14orf159, mitochondrial	C14orf159
-0.19495415687561	-0.296581357717514	-0.162790209054947	0.0736108720302582	0.0620218366384506	0.105244554579258	0.315613806247711	0.216085866093636	+	5%_21%	Discard	Keep	+_Discard	+_Keep	3	3	3	23373	15374	29678	263278624	469998120	0,560169517993927	-1.78517	1,78583447913265	-0,319920228794217	-3,30163834221524	Q9NX04;V9GYI2;V9GY35;V9GYN4;V9GYQ8;V9GYT8;Q9NX04-2;A0A087WUX7	Q9NX04;V9GYI2;V9GY35;V9GYN4;V9GYQ8;V9GYT8;Q9NX04-2	Uncharacterized protein C1orf109	C1orf109
0.00111468811519444	0.170405939221382	0.179327666759491	-0.00495205260813236	0.267825096845627	0.413493096828461	0.274985730648041	0.41191640496254	+	5%_21%	Discard	Keep	+_Discard	+_Keep	5	5	5	37318	0	47319	393513488	629376120	0,625243723392487	-1.59938	2,10219673308203	-0,255581021949183	-3,90881319118989	Q9H6V9;Q9H6V9-2;B5MDU6;B5MCU4;A0A0A0MSH6;Q9H6V9-4;Q9H6V9-3;C9JHU6;C9JUM0;B5MCE2;B4DRG3	Q9H6V9;Q9H6V9-2;B5MDU6;B5MCU4;A0A0A0MSH6;Q9H6V9-4;Q9H6V9-3;C9JHU6;C9JUM0	UPF0554 protein C2orf43	C2orf43;LDAH
-0.756684303283691	-0.528205096721649	-0.64495325088501	-0.793889164924622	-0.349661201238632	-0.387837648391724	-0.216795697808266	-0.340722948312759	+	5%_21%	Discard	Keep	+_Discard	+_Keep	19	19	17	10945	0	39655	98863930	189530316	0,521625936031342	-1.91708	2,63934089993934	-0,357178580015898	-5,0671857019888	Q13191;B5MC15;Q13191-3;Q13191-2;Q68CY2;E9PHA9;C9JU85;C9JRB3	Q13191;B5MC15;Q13191-3;Q13191-2	E3 ubiquitin-protein ligase CBL-B	CBLB
-0.0698265805840492	-0.189100101590157	-0.0271351300179958	-0.492532998323441	0.320756882429123	0.192003414034843	0.150679156184196	0.10739354044199	+	5%_21%	Discard	Keep	+_Discard	+_Keep	8	8	8	39134	0	23431	246598774	480141656	0,513595879077911	-1.94706	1,82664440584481	-0,387356950901449	-3,37738673502883	O75794;X6RA30;X6RKY7;X6RF82;H7BZW7	O75794;X6RA30;X6RKY7;X6RF82	Cell division cycle protein 123 homolog	CDC123
-0.37817257642746	-1.55374097824097	-1.65457105636597	-1.54043161869049	-0.576367199420929	-0.310829490423203	-0.198457792401314	-0.50816535949707	+	5%_21%	Discard	Keep	+_Discard	+_Keep	14	13	13	84639	0	2311	56730246,5	170749478	0,332242608070374	-3.00985	1,51067980843742	-0,883274096995592	-2,80757300295153	O15111	O15111	Inhibitor of nuclear factor kappa-B kinase subunit alpha	CHUK
1.12326157093048	0.979379892349243	0.960776388645172	0.989237725734711	1.25782418251038	1.33843100070953	1.28859150409698	1.29847943782806	+	5%_21%	Discard	Keep	+_Discard	+_Keep	19	19	19	76096	0	32331	2084924448	3471404544	0,600599646568298	-1.665	3,35342384691791	-0,282667636871338	-6,9415562053297	O96005;O96005-4;O96005-3;K7EQQ1;K7EJ16;K7ERL5	O96005;O96005-4;O96005-3	Cleft lip and palate transmembrane protein 1	CLPTM1
0.616405189037323	0.674887537956238	0.672280967235565	0.658663094043732	1.81477701663971	1.88233911991119	0.619555473327637	1.8492978811264	+	5%_21%	Discard	Keep	+_Discard	+_Keep	26	26	26	52878	0	32331	1085713872	7286121856	0,149011224508286	-6.7109	1,55033705097743	-0,885933175683022	-2,87716379773626	Q96KP4;Q96KP4-2;J3QKT2;J3KSV5;A0A087WYZ1;J3QRD0;J3QR27;J3QLU1;J3QKQ0;J3QL02;J3QQN6;A0A087WVS2;J3QRA8;J3KSS4;J3KRD5;J3QRH4;J3QRP4	Q96KP4;Q96KP4-2	Cytosolic non-specific dipeptidase	CNDP2
-0.6931973695755	-0.618493735790253	-0.633804857730865	-0.522872805595398	-0.323635369539261	-0.379095435142517	-0.44299903512001	-0.320760786533356	+	5%_21%	Discard	Keep	+_Discard	+_Keep	14	14	14	76118	0	92046	109487312	174936516	0,625868856906891	-1.59778	2,81944173870716	-0,250469535589218	-5,49954691133908	Q8NE01;Q8NE01-2;Q8NE01-3	Q8NE01;Q8NE01-2;Q8NE01-3	Metal transporter CNNM3	CNNM3
0.240542396903038	0.221927583217621	0.296881079673767	0.80779367685318	0.892415463924408	0.888358950614929	0.767232418060303	0.890444338321686	+	5%_21%	Discard	Keep	+_Discard	+_Keep	2	2	2	13291	16147	71979	748147344	1588757280	0,470900982618332	-2.12359	1,7702434346139	-0,46782660856843	-3,27288270023157	Q5RI15;Q5RI15-2	Q5RI15;Q5RI15-2	Cytochrome c oxidase protein 20 homolog	COX20
-1.95283114910126	-1.35108208656311	-1.26966059207916	-0.723272681236267	-0.732592880725861	-0.791914820671082	-0.697004199028015	-0.396600246429443	+	5%_21%	Discard	Keep	+_Discard	+_Keep	9	9	9	70857	0	20105	40136082	108938222	0,368429720401764	-2.71422	1,33896685268055	-0,669683590531349	-2,51137991674944	P43155;P43155-2;P43155-3;B7ZBP5;A6PVN3;H0Y4Z7	P43155;P43155-2;P43155-3	Carnitine O-acetyltransferase	CRAT
-1.32724237442017	-1.06315159797668	-1.50443434715271	-1.29673588275909	-1.12981498241425	-0.946647584438324	-1.03049194812775	-1.03321707248688	+	5%_21%	Discard	Keep	+_Discard	+_Keep	10	1	1	49064	1	-2	33034705	52782717	0,625862121582031	-1.5978	1,43718070918289	-0,262848153710365	-2,67983340472346	H7BYT1;P48730-2;H0Y645;J3QQI9;H0Y2N6;J3KRM8;B4DLF1	H7BYT1;P48730-2;H0Y645	Casein kinase I isoform delta	CSNK1D;CSNK1E
-0.62771087884903	-0.133215054869652	-0.330262213945389	-0.243334829807281	-0.0797772258520126	-0.0243277568370104	-0.00682421680539846	0.0240528024733067	+	5%_21%	Discard	Keep	+_Discard	+_Keep	9	9	1	67586	0	17235	190536048	325269152	0,585779666900635	-1.70713	1,55337094365847	-0,311911645112559	-2,88250805010143	O43310;K7EK08;K7EPK6	O43310	CBP80/20-dependent translation initiation factor	CTIF
0.281037539243698	-0.408600747585297	-0.593726277351379	0.0562022626399994	0.561466991901398	0.402899533510208	0.479317873716354	0.364487141370773	+	5%_21%	Discard	Keep	+_Discard	+_Keep	4	4	4	51853	0	35855	297681796	765313232	0,388967275619507	-2.57091	1,61296529494381	-0,618314690887928	-2,98809800827415	P53634;H0YCY8;P53634-2;P53634-3	P53634;H0YCY8	Dipeptidyl peptidase 1;Dipeptidyl peptidase 1 exclusion domain chain;Dipeptidyl peptidase 1 heavy chain;Dipeptidyl peptidase 1 light chain	CTSC
0.308751165866852	0.260815888643265	0.128784656524658	0.183129712939262	0.800226032733917	0.586719512939453	0.630374729633331	0.512062609195709	+	5%_21%	Discard	Keep	+_Discard	+_Keep	11	11	11	44552	0	86157	498126792	1067685680	0,466548144817352	-2.1434	2,8769852405846	-0,411975365132093	-5,6430006469723	P07339;F8WD96;C9JH19;F8W787;H7C469;H7C1V0	P07339;F8WD96;C9JH19	Cathepsin D;Cathepsin D light chain;Cathepsin D heavy chain	CTSD
0.526494681835175	0.761418759822845	0.857547163963318	0.79288512468338	0.943150639533997	1.06240236759186	0.989390254020691	1.06366264820099	+	5%_21%	Discard	Keep	+_Discard	+_Keep	4	4	4	33868	0	14321	1281120752	2101096320	0,609739184379578	-1.64005	1,93990680876788	-0,280065044760704	-3,5914391788244	Q9UBR2	Q9UBR2	Cathepsin Z	CTSZ
-1.34687721729279	-1.53400814533234	-1.31057178974152	-1.22375130653381	-1.13058435916901	-0.761926293373108	-0.825039982795715	-0.713678359985352	+	5%_21%	Discard	Keep	+_Discard	+_Keep	2	2	2	41955	98522	31039	29409984	75358137	0,39026951789856	-2.56233	2,31186650820595	-0,495994865894318	-4,33972129136043	P32302;P32302-2	P32302;P32302-2	C-X-C chemokine receptor type 5	CXCR5
0.483500808477402	0.239004001021385	0.389197945594788	0.244561091065407	0.57200026512146	0.646400034427643	0.593854546546936	0.612254500389099	+	5%_21%	Discard	Keep	+_Discard	+_Keep	18	18	18	72456	0	25133	625031456	1003849696	0,622634470462799	-1.60608	2,31529013808361	-0,267061375081539	-4,34696910116766	Q8N8A6	Q8N8A6	ATP-dependent RNA helicase DDX51	DDX51
-0.669943153858185	-1.12081444263458	-0.869597136974335	-0.978035271167755	-0.690348923206329	-0.629722595214844	-0.641582548618317	-0.569303870201111	+	5%_21%	Discard	Keep	+_Discard	+_Keep	6	6	6	55278	0	86561	67509095	108500532	0,622200608253479	-1.6072	1,51710657391286	-0,276858016848564	-2,81881772151942	O75907;A0A0A0MR74	O75907;A0A0A0MR74	Diacylglycerol O-acyltransferase 1	DGAT1
1.39770102500916	1.4450798034668	1.45322442054749	1.41989529132843	1.64802896976471	1.67734527587891	1.70939373970032	1.65828168392181	+	5%_21%	Discard	Keep	+_Discard	+_Keep	11	11	11	21452	0	68981	4387788736	6844384128	0,641078650951385	-1.55987	4,93853451569779	-0,24428728222847	-13,2302024240317	P00374;P00374-2;B4DM58;Q86XF0;C9JJ68	P00374;P00374-2;B4DM58	Dihydrofolate reductase	DHFR
0.36326876282692	0.387641161680222	0.319500803947449	0.522761940956116	0.85285758972168	0.612461149692535	0.636759638786316	0.600335597991943	+	5%_21%	Discard	Keep	+_Discard	+_Keep	6	6	6	33909	0	1769	687255616	1154446816	0,595311641693115	-1.67979	2,02184823831785	-0,277310326695442	-3,75003553915789	Q96LJ7;H0YNC2	Q96LJ7;H0YNC2	Dehydrogenase/reductase SDR family member 1	DHRS1
0.880222499370575	0.686520099639893	0.601627707481384	0.485216438770294	0.864340960979462	0.884773015975952	1.00033938884735	0.967364013195038	+	5%_21%	Discard	Keep	+_Discard	+_Keep	1	1	1	10094	0	1243	1140904000	1805082848	0,632050693035126	-1.58215	1,60548183941777	-0,265807658433914	-2,97477313286565	Q9P2X0;Q9P2X0-2	Q9P2X0;Q9P2X0-2	Dolichol-phosphate mannosyltransferase subunit 3	DPM3
-1.37876725196838	-1.33973908424377	-1.93036615848541	-1.41638696193695	-0.979511678218842	-1.03300273418427	-1.05616652965546	-1.27573359012604	+	5%_21%	Discard	Keep	+_Discard	+_Keep	10	10	10	79467	0	30289	23096415,5	48390622	0,477291136980057	-2.09516	1,50841179534997	-0,43021123111248	-2,80360771723977	Q9NZJ0;F5GZ90;Q9NZJ0-2	Q9NZJ0;F5GZ90	Denticleless protein homolog	DTL
-1.33899116516113	-2.41328835487366	-1.91676926612854	-1.24117588996887	-1.14343154430389	-0.855889499187469	-0.804491877555847	-0.94010466337204	+	5%_21%	Discard	Keep	+_Discard	+_Keep	10	10	10	5505	0	17454	19815552	64358968	0,307891070842743	-3.2479	1,50529303745897	-0,791576772928238	-2,79815756171348	Q9NX74;E7EUN9;J3QLD5;I3L4Y9;H3BQX4;H3BM64;I3L4H0;I3L0K0;H3BMK6;I3L1K5;H3BRI6;H3BSF3;H3BTR3	Q9NX74;E7EUN9;J3QLD5;I3L4Y9	tRNA-dihydrouridine(20) synthase [NAD(P)+]-like	DUS2
-0.156289234757423	-0.478029251098633	-0.565049827098846	-0.105911321938038	0.120730243623257	-0.0822818428277969	0.0502478070557117	0.0944320186972618	+	5%_21%	Discard	Keep	+_Discard	+_Keep	11	11	11	58688	0	45311	195632056	369506480	0,529441475868225	-1.88878	1,63210741819739	-0,372101965360343	-3,02227054319611	Q5JPH6;H3BTB7;Q5JPH6-2	Q5JPH6;H3BTB7;Q5JPH6-2	Probable glutamate--tRNA ligase, mitochondrial	EARS2
-0.858254253864288	-0.949097752571106	-1.02620315551758	-0.97528076171875	-0.259416967630386	-0.519999921321869	-0.571042895317078	-0.172897055745125	+	5%_21%	Discard	Keep	+_Discard	+_Keep	13	13	13	87163	0	90617	59869519	178248728	0,335876256227493	-2.97729	2,82943227043718	-0,571369770914316	-5,52426262369343	P42892;P42892-3;B4DKB2;P42892-2;P42892-4	P42892;P42892-3;B4DKB2;P42892-2;P42892-4	Endothelin-converting enzyme 1	ECE1
1.49285233020782	0.0956242457032204	0.544481515884399	1.51013612747192	1.78491830825806	1.82511103153229	1.88169658184052	1.75436270236969	+	5%_21%	Discard	Keep	+_Discard	+_Keep	3	3	1	12732	0	2026	2819933968	8797353600	0,32054340839386	-3.1197	1,35739681609403	-0,900748601183295	-2,54281281278443	P41567;K7EM18	P41567;K7EM18	Eukaryotic translation initiation factor 1	EIF1
-0.518834710121155	-0.256069481372833	-0.146399274468422	-0.398035705089569	0.00794333871454	0.231531143188477	-0.0754508003592491	0.306123405694962	+	5%_21%	Discard	Keep	+_Discard	+_Keep	5	5	5	3262	0	34502	189363976	434634304	0,435685753822327	-2.29523	1,9862438042451	-0,447371564572677	-3,68072223288215	Q14249	Q14249	Endonuclease G, mitochondrial	ENDOG
0.565833210945129	0.578736186027527	0.667803347110748	0.427022248506546	0.697651863098145	0.843649744987488	0.795091450214386	0.821050226688385	+	5%_21%	Discard	Keep	+_Discard	+_Keep	12	12	12	48349	0	50505	925186544	1401892000	0,659955680370331	-1.51525	2,08551112007517	-0,229512073099613	-3,87556531968797	O75616;J3QSB2;J3QRV9;O75616-2;J3QT61;K7EQJ8	O75616;J3QSB2;J3QRV9;O75616-2	GTPase Era, mitochondrial	ERAL1
-0.124553814530373	0.00273250206373632	-0.0401663854718208	0.0436785966157913	0.278392672538757	0.508163154125214	0.532104432582855	0.458667248487473	+	5%_21%	Discard	Keep	+_Discard	+_Keep	21	21	21	1411	0	12689	316366824	761793344	0,415292173624039	-2.40794	3,37185388433296	-0,473909152264241	-6,99610956120528	Q2NKX8;B5MDQ0	Q2NKX8;B5MDQ0	DNA excision repair protein ERCC-6-like	ERCC6L
-0.938436806201935	-1.07485580444336	-1.07449412345886	-1.06828415393829	-0.660898864269257	-0.612173855304718	-0.744687855243683	-0.773280143737793	+	5%_21%	Discard	Keep	+_Discard	+_Keep	17	17	17	23317	0	15351	51211493	96437872	0,531030893325806	-1.88313	3,30959921687452	-0,34125754237175	-6,81321149501093	Q14674;Q14674-2;H3BRX7;H3BM31	Q14674;Q14674-2	Separin	ESPL1
-1.06315755844116	-1.1761029958725	0.105738364160061	-0.687905728816986	-0.0298368632793427	0.364320427179337	0.331709921360016	0.030543889850378	+	5%_21%	Discard	Keep	+_Discard	+_Keep	10	10	10	30776	0	63775	148686579	483335568	0,307625979185104	-3.2507	1,54337244703142	-0,879541323520243	-2,86490663925516	Q96ND0;K7EK00;K7ERQ2;K7EPG9	Q96ND0;K7EK00	Protein FAM210A	FAM210A
-0.818091094493866	-0.812809586524963	-0.864047944545746	-0.909574687480927	-0.322624862194061	-0.56265664100647	-0.598944544792175	-0.566502571105957	+	5%_21%	Discard	Keep	+_Discard	+_Keep	12	12	11	11863	0	20747	71629376	136208840	0,525879085063934	-1.90158	2,6081227618111	-0,33844867348671	-4,99469149299515	Q9Y4F1;C9JME2;Q9Y4F1-2;M0QXT1;M0R262;M0QYB0;H0Y783	Q9Y4F1;C9JME2;Q9Y4F1-2	FERM, RhoGEF and pleckstrin domain-containing protein 1	FARP1
-0.424451589584351	-0.485325455665588	-0.588934600353241	-0.477379471063614	-0.344717293977737	-0.0727500021457672	-0.0675351992249489	-0.315897822380066	+	5%_21%	Discard	Keep	+_Discard	+_Keep	4	4	4	34043	0	35586	136757664	241334804	0,566671967506409	-1.76469	1,91680031138663	-0,293797699734569	-3,54729736121364	P31994;P31994-3;P31994-2;P31995;P31995-4;P31995-3;P31995-2	P31994;P31994-3;P31994-2	Low affinity immunoglobulin gamma Fc region receptor II-b	FCGR2B
-1.22453272342682	-1.17057943344116	-0.990410923957825	-1.19089245796204	-0.996883809566498	-0.841018736362457	-0.935922980308533	-0.733695030212402	+	5%_21%	Discard	Keep	+_Discard	+_Keep	7	7	7	76941	167	85955	42810859	71080018	0,602291107177734	-1.66033	1,85702969152282	-0,267223745584488	-3,43424845477895	Q86WN1;Q86WN1-2;E5RK49;E5RGT6;Q86WN1-3;E5RGB1	Q86WN1;Q86WN1-2	F-BAR and double SH3 domains protein 1	FCHSD1
0.58398962020874	0.687706530094147	0.665290176868439	0.6546231508255	1.8690230846405	1.8735066652298	1.85661637783051	1.77662694454193	+	5%_21%	Discard	Keep	+_Discard	+_Keep	15	15	15	48115	0	32331	1072158624	9308882176	0,115175873041153	-8.68237	7,61923275492273	-1,19604089856148	-37,4927047799994	P37268;E9PNM1;P37268-2;P37268-5;P37268-4;P37268-3;E9PJG4;E9PS69	P37268;E9PNM1;P37268-2;P37268-5;P37268-4;P37268-3	Squalene synthase	FDFT1
-2.07019734382629	-1.70869779586792	-1.75310051441193	-1.41788601875305	-0.895111799240112	-1.05795836448669	-0.866054058074951	-1.02963495254517	+	5%_21%	Discard	Keep	+_Discard	+_Keep	4	4	4	70263	15335	53335	15575534,75	60164449	0,258882701396942	-3.86275	2,80600035655932	-0,775280624628067	-5,46641880914931	Q9UK73;H3BT12	Q9UK73;H3BT12	Protein fem-1 homolog B	FEM1B
-0.325109899044037	-0.319177657365799	-0.246857911348343	-0.289202213287354	0.102364338934422	0.00840006768703461	-0.150559857487679	-0.137646988034248	+	5%_21%	Discard	Keep	+_Discard	+_Keep	12	12	12	64608	0	14516	195368256	315481616	0,619269907474518	-1.6148	2,12712984505372	-0,250726310536265	-3,95877048625723	Q05932;Q05932-3;Q05932-2;Q05932-4;Q5JU21;Q5JU20;Q5JU23	Q05932;Q05932-3;Q05932-2;Q05932-4	Folylpolyglutamate synthase, mitochondrial	FPGS
0.0247463863343	-0.00494896061718464	-0.0424809455871582	0.156042367219925	0.995860934257507	0.778733849525452	0.928078293800354	0.696047246456146	+	5%_21%	Discard	Keep	+_Discard	+_Keep	7	7	7	20019	0	40468	355496816	1585320096	0,224242940545082	-4.45945	4,26020839380791	-0,816340369172394	-10,0934074465436	P02792;A0A087X1B9	P02792;A0A087X1B9	Ferritin light chain;Ferritin	FTL
1.37496507167816	1.01464092731476	1.22609746456146	1.29412198066711	1.40546762943268	1.59963703155518	1.54804229736328	1.60106301307678	+	5%_21%	Discard	Keep	+_Discard	+_Keep	20	19	19	5412	0	30169	3136390432	5422457792	0,578407526016235	-1.72888	1,8714253242908	-0,311096131801605	-3,46132917818517	Q9UN86;Q9UN86-2;D6RAC7;D6RB17;D6RGJ4;D6RBM9;D6REX8;D6RBR0;D6RE13;D6RBW8;D6R9X5;D6R9A4	Q9UN86;Q9UN86-2	Ras GTPase-activating protein-binding protein 2	G3BP2
-2.07217192649841	-1.19275832176208	-1.74989819526672	-2.78705883026123	-0.779930174350739	-0.883526086807251	-1.05074000358582	-0.712121725082397	+	5%_21%	Discard	Keep	+_Discard	+_Keep	10	10	10	67638	0	71995	15627221	74139157	0,210782274603844	-4.74423	1,73553707909463	-1,09389232099056	-3,20922515935	Q9H2C0	Q9H2C0	Gigaxonin	GAN
-0.528831720352173	-0.245798766613007	-0.316927939653397	-0.0927402153611183	-0.1521305590868	0.0336337275803089	-0.0872548595070839	0.0502420477569103	+	5%_21%	Discard	Keep	+_Discard	+_Keep	4	4	4	28636	72254	37001	201547056	318589864	0,632622301578522	-1.58072	1,33320224261698	-0,257197249680758	-2,50156385766254	Q9NWZ8;H7BYE2	Q9NWZ8	Gem-associated protein 8	GEMIN8
-1.17854988574982	0.254294544458389	-0.972542405128479	-0.917710661888123	0.204287171363831	0.305079847574234	0.212520942091942	0.390560626983643	+	5%_21%	Discard	Keep	+_Discard	+_Keep	8	8	8	24534	0	16034	169423229	562499408	0,301197171211243	-3.32008	1,62006297656679	-0,98173924908042	-3,00075386758521	Q9BRX5;Q9BRX5-3;Q9BRX5-2	Q9BRX5;Q9BRX5-3	DNA replication complex GINS protein PSF3	GINS3
0.121661193668842	-0.151205226778984	-0.0698033347725868	-0.0764128565788269	0.559656500816345	0.590572357177734	0.546531140804291	0.429886162281036	+	5%_21%	Discard	Keep	+_Discard	+_Keep	12	12	12	54389	0	17516	312683772	879934688	0,355348825454712	-2.81414	3,8281767077763	-0,575601596385241	-8,46484244131514	Q9NZM5;M0QZ34;M0QYZ9;M0QZU5;M0QX73	Q9NZM5;M0QZ34	Glioma tumor suppressor candidate region gene 2 protein	GLTSCR2
0.40644583106041	-0.0296023022383451	0.377402305603027	-0.0294292364269495	0.542824923992157	0.490967810153961	0.622008562088013	0.511292040348053	+	5%_21%	Discard	Keep	+_Discard	+_Keep	19	19	19	83654	0	17889	497508008	896636464	0,554860293865204	-1.80226	1,55242972097713	-0,36056918464601	-2,88084975527908	Q13823;H0YG10	Q13823	Nucleolar GTP-binding protein 2	GNL2
0.946745455265045	0.867310047149658	0.653211414813995	0.831123232841492	1.07466626167297	1.09106290340424	1.13743042945862	1.07586169242859	+	5%_21%	Discard	Keep	+_Discard	+_Keep	19	19	19	61992	0	4295	1497547712	2417586880	0,61943906545639	-1.61436	2,26362471477321	-0,270157784223557	-4,2383406861113	Q9BVP2;Q9BVP2-2;C9JYH9;C9JZT7;B4DMU5	Q9BVP2;Q9BVP2-2	Guanine nucleotide-binding protein-like 3	GNL3
-0.503842532634735	-0.753553807735443	-0.763074457645416	0.226460576057434	0.333237588405609	0.207686007022858	0.130301266908646	0.135005906224251	+	5%_21%	Discard	Keep	+_Discard	+_Keep	37	37	37	26114	0	35425	198718812	488249632	0,407002478837967	-2.45699	1,46947257127619	-0,650060247629881	-2,73576583889621	Q13439;Q13439-5;Q13439-3;Q13439-4;H0Y6I0;C9JHJ5;E7EVX2;A0A087WTW2;Q86W71	Q13439;Q13439-5;Q13439-3;Q13439-4;H0Y6I0	Golgin subfamily A member 4	GOLGA4
-1.83858454227448	-1.0438688993454	-0.908734321594238	-0.902918040752411	-0.278326362371445	-0.420652717351913	-0.509284794330597	-0.530688405036926	+	5%_21%	Discard	Keep	+_Discard	+_Keep	4	4	4	32761	0	27814	47852601,5	155965492	0,306815326213837	-3.25929	1,72738906203363	-0,73878838121891	-3,19434972769069	Q9UHW5;Q9UHW5-2;Q9UHW5-3;H0YI19;F8W1F4;S4R3M7;H0YHZ5	Q9UHW5;Q9UHW5-2;Q9UHW5-3;H0YI19;F8W1F4	GPN-loop GTPase 3	GPN3
-1.37592995166779	-1.34896147251129	-1.60659110546112	-1.58585929870605	-1.239590883255	-1.1733490228653	-1.1376713514328	-1.13247323036194	+	5%_21%	Discard	Keep	+_Discard	+_Keep	8	8	8	1024	0	14477	23466666	41205902	0,569497644901276	-1.75593	2,28083239847522	-0,308564335107803	-4,27434383628436	Q7Z2K8;Q7Z2K8-2	Q7Z2K8;Q7Z2K8-2	G protein-regulated inducer of neurite outgrowth 1	GPRIN1
0.812942445278168	0.591751098632813	0.753546476364136	0.778639316558838	1.15766298770905	1.21805334091187	1.15034329891205	1.11071729660034	+	5%_21%	Discard	Keep	+_Discard	+_Keep	7	7	7	22174	0	13926	1265916160	2714767936	0,46630734205246	-2.14451	3,66086409247483	-0,424974396824837	-7,89880995847596	P36969;A0A087X2I2;A0A087WT12;P36969-2;K7ERP4;K7EJ20;K7EKX7;R4GNE4;K7ENB4;A0A087X247;A0A0A0MTT1	P36969;A0A087X2I2;A0A087WT12;P36969-2;K7ERP4;K7EJ20;K7EKX7;R4GNE4;K7ENB4	Phospholipid hydroperoxide glutathione peroxidase, mitochondrial;Glutathione peroxidase	GPX4
-0.840690791606903	-0.643499374389648	-0.440588057041168	-0.532163679599762	-0.110264681279659	-0.42084789276123	-0.122396253049374	-0.255599975585938	+	5%_21%	Discard	Keep	+_Discard	+_Keep	6	6	6	63544	0	12084	113515244	228943420	0,49582228064537	-2.01685	1,85919322992605	-0,38695827499032	-3,43831259547158	P28799;P28799-3;K7EKL3;K7EQ05;P28799-2;K7EQI0	P28799;P28799-3;K7EKL3;K7EQ05;P28799-2	Granulins;Acrogranin;Paragranulin;Granulin-1;Granulin-2;Granulin-3;Granulin-4;Granulin-5;Granulin-6;Granulin-7	GRN
-0.285906970500946	-0.182338982820511	-0.322459489107132	-0.1833266466856	0.0618761293590069	0.153014674782753	-0.23226073384285	0.0766215324401855	+	5%_21%	Discard	Keep	+_Discard	+_Keep	4	4	4	25431	15372	29664	214846172	357046848	0,601731061935425	-1.66187	1,51077636662213	-0,258320922963321	-2,80774185516634	Q8TAA5;D6RGI6	Q8TAA5	GrpE protein homolog 2, mitochondrial	GRPEL2
0.801982283592224	0.916137933731079	0.880505979061127	0.830994188785553	1.10518944263458	1.22173094749451	1.19969189167023	0.981540739536285	+	5%_21%	Discard	Keep	+_Discard	+_Keep	16	16	1	53126	0	23913	1566554432	2588489472	0,605200231075287	-1.65235	2,37333350347325	-0,269633159041405	-4,47093941650709	Q12849;H0Y8R1;H0YAK1;Q12849-5;H0YAM1	Q12849;H0Y8R1;H0YAK1;Q12849-5	G-rich sequence factor 1	GRSF1
-1.07622134685516	-1.22210919857025	-1.02026700973511	-1.27127158641815	-0.791444838047028	-0.721467018127441	-0.917910933494568	-0.876193642616272	+	5%_21%	Discard	Keep	+_Discard	+_Keep	5	5	3	27604	15972	67696	42746896	76707197	0,55727356672287	-1.79445	2,31652538270093	-0,320713177323341	-4,34958585183367	P17483;P09016;Q00056;H0YHX3	P17483	Homeobox protein Hox-B4	HOXB4
-0.294480532407761	-0.278648197650909	-0.719269216060638	-0.513916611671448	0.260166645050049	0.158810541033745	0.186812669038773	-0.00669266190379858	+	5%_21%	Discard	Keep	+_Discard	+_Keep	12	12	12	5049	0	35439	154070152	445946440	0,345490247011185	-2.89444	2,64421563116735	-0,601352937752381	-5,07856912958901	Q8TCB0;C9JUM8;H7C1F3;Q8TCB0-2	Q8TCB0;C9JUM8	Interferon-induced protein 44	IFI44
-0.683820486068726	-1.07475483417511	-0.837929546833038	-1.15577554702759	0.222599163651466	0.32861664891243	0.19754022359848	0.0576747581362724	+	5%_21%	Discard	Keep	+_Discard	+_Keep	10	10	10	51322	0	8327	65076359	489772344	0,132870629429817	-7.52612	4,07291471727236	-1,13967780210078	-9,35612906691779	Q53G44;H7C1K6;Q53G44-2;C9JPJ0	Q53G44;H7C1K6;Q53G44-2	Interferon-induced protein 44-like	IFI44L
-1.17056930065155	-0.172166973352432	-0.297400176525116	-1.32987761497498	0.281779676675797	0.246900990605354	0.172831401228905	0.115585006773472	+	5%_21%	Discard	Keep	+_Discard	+_Keep	10	10	9	55846	0	4091	127231733,5	488485608	0,26046159863472	-3.83934	1,71573532738114	-0,9467777851969	-3,17311917393812	Q13325;Q13325-2	Q13325;Q13325-2	Interferon-induced protein with tetratricopeptide repeats 5	IFIT5
1.08557736873627	1.14289677143097	0.926833927631378	1.03085815906525	1.3382294178009	1.29957759380341	1.31418597698212	1.16729509830475	+	5%_21%	Discard	Keep	+_Discard	+_Keep	14	14	14	51772	0	21125	2217771232	3386069248	0,654969274997711	-1.52679	2,0956396680708	-0,233280465006828	-3,89573003571187	Q15306;Q15306-2;F2Z3D5	Q15306;Q15306-2;F2Z3D5	Interferon regulatory factor 4	IRF4
0.155613854527473	0.295807182788849	0.289136469364166	0.210417553782463	0.392070591449738	0.560527682304382	0.551675140857697	0.618932843208313	+	5%_21%	Discard	Keep	+_Discard	+_Keep	11	11	11	32992	0	48213	512972440	887461888	0,578021943569183	-1.73004	2,59446707459617	-0,293057799339294	-4,9631994669068	Q9ULR0;Q9ULR0-2;Q9ULR0-1;A8MVI5;D6RC18;H0YA89	Q9ULR0;Q9ULR0-2;Q9ULR0-1;A8MVI5	Pre-mRNA-splicing factor ISY1 homolog	ISY1
-1.56419920921326	-1.33167886734009	-1.26217043399811	-1.06341814994812	-0.909969747066498	-0.800076603889465	-0.930594086647034	-1.12576830387115	+	5%_21%	Discard	Keep	+_Discard	+_Keep	3	3	3	86902	0	72279	32968576,5	62997334	0,523332834243774	-1.91083	1,58837865022441	-0,363764479756355	-2,94439132759309	P26010;F5H6T4;P26010-2;F8VNX4	P26010;F5H6T4;P26010-2;F8VNX4	Integrin beta-7;Integrin beta	ITGB7
-1.38404905796051	-1.34618365764618	-1.39721214771271	-1.39335191249847	-1.35656905174255	-1.16652989387512	-1.02880561351776	-0.891745567321777	+	5%_21%	Discard	Keep	+_Discard	+_Keep	7	7	7	1251	29762	44686	27485042	48277980,5	0,569308042526245	-1.75652	1,44569116282326	-0,269286662340164	-2,69454636730387	P52333;P52333-2;P52333-4	P52333;P52333-2	Tyrosine-protein kinase JAK3	JAK3
-1.08638536930084	-1.23149311542511	-1.18928205966949	-0.910752952098846	-1.06334984302521	-0.572309017181396	-0.620547890663147	-0.720342695713043	+	5%_21%	Discard	Keep	+_Discard	+_Keep	7	7	7	58143	0	26253	46265840	93555214	0,494529783725739	-2.02212	1,46849805094146	-0,360341012477875	-2,73407361926344	Q9NVX7;Q9NVX7-2;A0A075B6T4;E9PL18;E9PQ38;E9PJ66;E9PJY1;E9PM58	Q9NVX7;Q9NVX7-2;A0A075B6T4	Kelch repeat and BTB domain-containing protein 4	KBTBD4
-1.01867067813873	-2.34689879417419	-0.0356711223721504	-1.01404678821564	0.282268524169922	0.501105964183807	0.247692421078682	0.209325641393661	+	5%_21%	Discard	Keep	+_Discard	+_Keep	30	30	30	20202	0	32331	107576533,25	599929728	0,179315224289894	-5.57677	1,59271082195138	-1,4139199834317	-2,95207755772713	Q69YN4;Q69YN4-3;Q69YN4-2;Q69YN4-4;H0YBN5;H0YB68	Q69YN4;Q69YN4-3;Q69YN4-2;Q69YN4-4	Protein virilizer homolog	KIAA1429
-0.947285234928131	-0.991106748580933	-0.93958991765976	-1.26861763000488	-0.895830869674683	-0.558416426181793	-0.684723198413849	-0.425769954919815	+	5%_21%	Discard	Keep	+_Discard	+_Keep	13	1	1	38945	1	-2	52712667	112304558	0,469372451305389	-2.1305	1,68424938975182	-0,395464770495892	-3,11601957447024	B7Z6P3	B7Z6P3		KTN1
0.76176643371582	0.721490919589996	-0.465282559394836	0.71662175655365	1.80770003795624	1.87423717975616	0.67362254858017	1.79617166519165	+	5%_21%	Discard	Keep	+_Discard	+_Keep	23	23	23	57548	0	32331	967246992	7029645504	0,137595415115356	-7.26768	1,4219284255139	-1,1042837202549	-2,65351377100613	P49257	P49257	Protein ERGIC-53	LMAN1
-0.0677368864417076	-0.263859122991562	-0.223586559295654	-0.100518204271793	0.175301238894463	0.174421399831772	0.133379608392715	0.0252731535583735	+	5%_21%	Discard	Keep	+_Discard	+_Keep	19	19	19	75225	0	13863	249738364	424853800	0,587821900844574	-1.7012	2,58065470010338	-0,29101904341951	-4,93148029490314	Q9H089;H7C2X7;F8WFC6	Q9H089	Large subunit GTPase 1 homolog	LSG1
-0.219304159283638	0.043897919356823	-0.0689641460776329	-0.504417955875397	0.0858787968754768	0.320706248283386	0.295828849077225	0.307157963514328	+	5%_21%	Discard	Keep	+_Discard	+_Keep	6	6	2	21701	0	3345	252842144	539284744	0,468847215175629	-2.13289	1,8132592273557	-0,439590049907565	-3,35246462779561	Q3MHD2;Q3MHD2-2	Q3MHD2;Q3MHD2-2	Protein LSM12 homolog	LSM12
-0.387932062149048	-0.630725741386414	-0.382830709218979	-0.632436871528625	-0.171303704380989	-0.269028216600418	-0.246503233909607	-0.244335874915123	+	5%_21%	Discard	Keep	+_Discard	+_Keep	24	24	1	11374	0	22747	136505736	221893460	0,615185916423798	-1.62552	2,0044799806796	-0,275688588619232	-3,71614538757586	O00754;M0QZ24;M0R174;M0QYZ1	O00754	Lysosomal alpha-mannosidase;Lysosomal alpha-mannosidase A peptide;Lysosomal alpha-mannosidase B peptide;Lysosomal alpha-mannosidase C peptide;Lysosomal alpha-mannosidase D peptide;Lysosomal alpha-mannosidase E peptide	MAN2B1
-2.81190466880798	-2.64089608192444	-2.44847202301025	-2.47845339775085	-2.38612008094788	-2.20351719856262	-2.24957895278931	-2.44480013847351	+	5%_21%	Discard	Keep	+_Discard	+_Keep	33	2	2	85251	15755	62163	3168161,5	5255489,25	0,602829039096832	-1.65885	1,45416293764393	-0,273927450180054	-2,70921213815094	P27816-5;H7C4C5	P27816-5;H7C4C5	Microtubule-associated protein 4;Microtubule-associated protein	MAP4
-0.0161716844886541	-0.0322514846920967	-0.16409495472908	-0.248182579874992	0.0655276030302048	0.295972377061844	0.305957615375519	0.278896689414978	+	5%_21%	Discard	Keep	+_Discard	+_Keep	12	12	12	6659	0	12538	273884624	524529544	0,522152900695801	-1.91515	2,34759087710372	-0,351763747166842	-4,41570128344461	Q96GW9	Q96GW9	Methionine--tRNA ligase, mitochondrial	MARS2
-0.231445819139481	-0.536094188690186	-0.640546977519989	-0.559059262275696	-0.107386194169521	-0.128173992037773	-0.133462101221085	-0.179405108094215	+	5%_21%	Discard	Keep	+_Discard	+_Keep	10	10	10	52891	0	59346	142735568	263225700	0,542255461215973	-1.84415	2,0986422402241	-0,354679713025689	-3,9017181755646	P50579;P50579-3;F8VQZ7;P50579-2;F8VRR3;G3V1U3;F8VSC4;F8VY03;F8VZX9	P50579;P50579-3;F8VQZ7;P50579-2;F8VRR3;G3V1U3	Methionine aminopeptidase 2	METAP2
-0.23567359149456	-0.0570225231349468	-0.0950516611337662	0.190941974520683	0.0778502225875854	0.432094693183899	0.451707571744919	0.397267043590546	+	5%_21%	Discard	Keep	+_Discard	+_Keep	5	5	5	25423	15939	66617	315186304	643926336	0,489475727081299	-2.043	1,68141854190548	-0,388931333087385	-3,11090421174196	A9UHW6;J3KSB8;J3QRZ6;J3QLJ5;A9UHW6-2;A9UHW6-3;J3QKW3;J3QLD1;J3KSU6;J3QLN4	A9UHW6;J3KSB8;J3QRZ6;J3QLJ5;A9UHW6-2;A9UHW6-3;J3QKW3;J3QLD1;J3KSU6	MIF4G domain-containing protein	MIF4GD
-1.20639824867249	-1.97521340847015	-1.390052318573	-1.67964065074921	-0.60128927230835	-1.24746561050415	-0.847239911556244	-1.16582977771759	+	5%_21%	Discard	Keep	+_Discard	+_Keep	15	15	15	528	0	19281	22709558,25	65385135	0,347319900989532	-2.87919	1,42357437907175	-0,597370013594627	-2,65635109041747	Q8IUF8;Q8IUF8-4;Q8IUF8-2;Q8IUF8-3;H0Y9L8;D6RCB6	Q8IUF8;Q8IUF8-4;Q8IUF8-2	Bifunctional lysine-specific demethylase and histidyl-hydroxylase MINA	MINA
-0.606326460838318	-1.44183278083801	-0.497823923826218	-1.31312596797943	-0.240234345197678	-0.0560774058103561	0.0829536914825439	0.139784082770348	+	5%_21%	Discard	Keep	+_Discard	+_Keep	5	1	1	22761	30189	48671	76577928	338906984	0,225955590605736	-4.42565	2,00066889692044	-0,946383789181709	-3,70872896386688	O95297-3;Q9UEL6	O95297-3;Q9UEL6	Myelin protein zero-like protein 1	MPZL1
-1.51304960250854	-1.51311504840851	-1.21125018596649	-1.40090537071228	-1.2153776884079	-1.1242059469223	-1.2826589345932	-1.05351758003235	+	5%_21%	Discard	Keep	+_Discard	+_Keep	5	5	5	13901	0	14274	26848930	41796257	0,64237642288208	-1.55672	1,48318966343927	-0,240640014410019	-2,75961391636571	Q9HCH0;Q9HCH0-3;H7C1V4;Q9HCH0-2	Q9HCH0;Q9HCH0-3;H7C1V4;Q9HCH0-2	Nck-associated protein 5-like	NCKAP5L
0.24345375597477	-1.03030574321747	-1.08062505722046	0.308380246162415	0.722517848014832	0.811395883560181	0.556272447109222	0.675593256950378	+	5%_21%	Discard	Keep	+_Discard	+_Keep	4	4	4	3348	0	40485	297177078	1182624064	0,251286208629608	-3.97953	1,49724354676651	-1,08121905848384	-2,7841042108803	Q8NI38;Q8NI38-2;Q8NI38-3;K7EKM2	Q8NI38;Q8NI38-2;Q8NI38-3	NF-kappa-B inhibitor delta	NFKBID
-0.99618536233902	-0.784623980522156	-0.768999516963959	-0.636585414409637	-0.610659122467041	-0.516036987304688	-0.561431467533112	-0.51148134469986	+	5%_21%	Discard	Keep	+_Discard	+_Keep	4	4	4	32407	0	14103	80682571	125803174	0,641339659690857	-1.55924	1,71263100981171	-0,246696338057518	-3,16747267104563	Q9NPE2;A0A087WVE0;A0A087WWE0	Q9NPE2;A0A087WVE0	Neugrin	NGRN
0.374730199575424	0.428858488798141	0.43927463889122	0.43095937371254	0.520175158977509	0.754777789115906	0.655823230743408	0.70145583152771	+	5%_21%	Discard	Keep	+_Discard	+_Keep	16	16	16	71085	0	25927	707710576	1114897456	0,634776413440704	-1.57536	2,42288210272486	-0,239602327346802	-4,57843470127507	Q9H6W3;Q9H6W3-2	Q9H6W3;Q9H6W3-2	Bifunctional lysine-specific demethylase and histidyl-hydroxylase NO66	NO66
0.826913595199585	0.982458889484406	0.811321437358856	0.983012735843658	1.20311987400055	1.37100803852081	1.31504607200623	1.29487073421478	+	5%_21%	Discard	Keep	+_Discard	+_Keep	19	19	2	74543	0	18288	1704999264	3487401728	0,488902449607849	-2.0454	3,27647712800333	-0,395084515213966	-6,71747886978898	A0A0A0MRM9;Q14978-2;Q14978	A0A0A0MRM9;Q14978-2;Q14978	Nucleolar and coiled-body phosphoprotein 1	NOLC1
-0.738123297691345	-0.991423308849335	-0.921742737293243	-1.21182477474213	-0.608592927455902	-0.539080619812012	-0.634047031402588	-0.561683118343353	+	5%_21%	Discard	Keep	+_Discard	+_Keep	3	3	3	63604	0	19647	61077493	117779680	0,518574118614197	-1.92836	2,04234297039863	-0,379927605390549	-3,79022077743645	Q12980;B7Z6Q0;F8WDA5;B1B1F5;A0A087WTD0	Q12980;B7Z6Q0	Nitrogen permease regulator 3-like protein	NPRL3
-0.746155202388763	-0.946401059627533	-0.737225234508514	-0.892302453517914	-0.686839520931244	-0.465046912431717	-0.596197903156281	-0.37322261929512	+	5%_21%	Discard	Keep	+_Discard	+_Keep	8	8	8	12404	0	414	75391716	133554030	0,56450343132019	-1.77147	1,86550510680162	-0,300194248557091	-3,450181081816	Q01804;Q01804-5;Q01804-3;D6RI06	Q01804;Q01804-5;Q01804-3	OTU domain-containing protein 4	OTUD4
-0.993199944496155	-1.16892886161804	-1.02825951576233	-0.866745471954346	-0.913743615150452	-0.82761412858963	-0.548379182815552	-0.745450973510742	+	5%_21%	Discard	Keep	+_Discard	+_Keep	11	11	11	1049	0	13553	54160907	88955638	0,608852982521057	-1.64243	1,367445537865	-0,255486473441124	-2,55998419121951	Q6VY07;Q6VY07-2;B4DF77;E9PPK2;E9PSE1;E9PNZ9;E9PSG7;E9PNG7;H0YF56	Q6VY07;Q6VY07-2;B4DF77	Phosphofurin acidic cluster sorting protein 1	PACS1
0.628035247325897	0.617075502872467	0.792448997497559	0.532127916812897	0.859305262565613	0.90548700094223	0.942686915397644	0.890001893043518	+	5%_21%	Discard	Keep	+_Discard	+_Keep	6	6	6	39416	0	22585	1077760464	1702013504	0,633226811885834	-1.57921	2,38667712228731	-0,256948351860046	-4,49973503883317	Q9BRP1	Q9BRP1	Programmed cell death protein 2-like	PDCD2L
0.218228578567505	0.154692858457565	-0.710787653923035	-0.0134255969896913	0.689747869968414	0.730253934860229	0.765179932117462	0.461694180965424	+	5%_21%	Discard	Keep	+_Discard	+_Keep	9	9	9	27614	0	69926	335430554	1127784608	0,29742431640625	-3.3622	1,80959320819253	-0,749541932949796	-3,34565209435063	Q9H2J4;C9JST4;H7BZP2	Q9H2J4	Phosducin-like protein 3	PDCL3
-0.969626903533936	-0.882031917572021	-0.848723471164703	-1.08532524108887	-0.928316712379456	-0.358122706413269	-0.608557462692261	-0.453664749860764	+	5%_21%	Discard	Keep	+_Discard	+_Keep	8	8	8	37458	0	39414	61078064	126283909	0,483656734228134	-2.06758	1,41955283572175	-0,359261475503445	-2,6494199475154	Q96JY6;Q96JY6-3;C9JS55;Q96JY6-4;C9JSR2;Q96JY6-5;A0A087WVI1;C9J760;C9J0X3;C9K0F0;Q96JY6-2;A0A087WXJ0;F8WFB8;H0YBP7;A0A087WU48;A0A087WUQ1;E5RGS7;B3KPU0;H7C1D1	Q96JY6;Q96JY6-3;C9JS55;Q96JY6-4;C9JSR2;Q96JY6-5;A0A087WVI1;C9J760;C9J0X3;C9K0F0;Q96JY6-2	PDZ and LIM domain protein 2	PDLIM2
-0.549577713012695	-0.968922793865204	-0.540049374103546	-0.963328719139099	-0.512880980968475	-0.193413004279137	-0.197750404477119	-0.286211967468262	+	5%_21%	Discard	Keep	+_Discard	+_Keep	11	11	11	77153	0	22779	91828865	202804154	0,452795773744583	-2.2085	1,73352617076997	-0,457905560731888	-3,20555151772995	Q96RR1;Q96RR1-2;Q96RR1-3	Q96RR1;Q96RR1-2;Q96RR1-3	Twinkle protein, mitochondrial	PEO1
-0.285421758890152	-0.298335790634155	-0.0998793616890907	-0.134902328252792	-0.171056732535362	0.10658797621727	0.0251148361712694	0.141689449548721	+	5%_21%	Discard	Keep	+_Discard	+_Keep	32	32	30	20669	0	32331	232673660	362195304	0,642398357391357	-1.55667	1,42598936346205	-0,230218692217022	-2,66051536866871	Q8WWQ0	Q8WWQ0	PH-interacting protein	PHIP
-0.751730918884277	-0.62537032365799	-0.799837470054626	-0.922499358654022	-0.556073546409607	-0.430533528327942	-0.505003750324249	-0.433260172605515	+	5%_21%	Discard	Keep	+_Discard	+_Keep	9	8	8	81544	0	48706	83489063	142655128	0,585251033306122	-1.70867	2,28611610084813	-0,293641768395901	-4,28543397012765	O00459;E9PFP1;Q92569-3;Q92569-2	O00459;E9PFP1	Phosphatidylinositol 3-kinase regulatory subunit beta	PIK3R2
-1.82886016368866	-1.46999716758728	-1.57379674911499	-1.21315896511078	-1.17275989055634	-1.12918102741241	-1.22537410259247	-1.10552823543549	+	5%_21%	Discard	Keep	+_Discard	+_Keep	6	6	6	84784	29811	45102	22851837,75	42138637	0,542301297187805	-1.84399	1,50114993971286	-0,363242447376251	-2,79092184401259	O60568;H7C2S8;H7C2V1;C9JIX5;H7C2A8;C9JU11	O60568	Procollagen-lysine,2-oxoglutarate 5-dioxygenase 3	PLOD3
0.11323643475771	0.143715262413025	0.0246618632227182	0.138517111539841	0.219022735953331	0.494138926267624	0.413098186254501	0.480192631483078	+	5%_21%	Discard	Keep	+_Discard	+_Keep	20	20	0	9755	0	32331	402422840	708424696	0,568053126335144	-1.7604	2,28831013510117	-0,29658045200631	-4,29004398236448	P29590;P29590-5;P29590-4;P29590-9;H3BT29;H3BVD2	P29590;P29590-5;P29590-4;P29590-9	Protein PML	PML
-1.642706990242	-1.58684778213501	-1.87911701202393	-1.68963730335236	-1.3929191827774	-1.14937305450439	-1.32985460758209	-1.1032931804657	+	5%_21%	Discard	Keep	+_Discard	+_Keep	15	1	1	6747	98745	31544	15670077,75	37026837,5	0,423208683729172	-2.3629	2,53857403198403	-0,455717265605927	-4,83566680586703	P29590-2	P29590-2	Protein PML	PML
0.352756500244141	0.699553310871124	0.423798650503159	0.74184775352478	0.868616759777069	1.03452694416046	0.804225921630859	0.946881294250488	+	5%_21%	Discard	Keep	+_Discard	+_Keep	3	2	2	74054	34671	21569	942177392	1763255808	0,534339606761932	-1.87147	1,7751836235808	-0,359073676168919	-3,28198343531577	A0A0C4DGB9	A0A0C4DGB9		PPA2
-1.49589228630066	-1.10579657554626	-2.54914784431458	-1.34854245185852	-0.751112520694733	-0.836706042289734	-0.692268192768097	-0.872195661067963	+	5%_21%	Discard	Keep	+_Discard	+_Keep	9	9	9	945	16469	79634	24602538,5	82091612	0,299696117639542	-3.33671	1,39462406066621	-0,836774185299873	-2,60654830139455	Q6P2P2;Q6P2P2-2	Q6P2P2;Q6P2P2-2	Putative protein arginine N-methyltransferase 9	PRMT9
[truncated: 54 more rows]

## Sheet: U2904 up-regulated 1%
Column1	Column2	Column3	Column4	Column5	Column6	Column7	Column8	Column9	Column10	Column11	Column12	Column13	Column14	Column15	Column16	Column17	Column18	Column19	Column20	Column21	Column22	Column23	Column23A	Column24	Column25	Column26	Column27	Column28	Column29	Column30
[truncated: 225 more rows]

## Sheet: U2904 down-regulated 1%
Column1	Column2	Column3	Column4	Column5	Column6	Column7	Column8	Column9	Column10	Column11	Column12	Column13	Column14	Column15	Column16	Column17	Column18	Column19	Column20	Column21	Column22	Column23	Column23A	Column24	Column25	Column26	Column27	Column28	Column29	Column30
[truncated: 264 more rows]

[truncated: 12 more sheets: U2904 up-regulated 5%, U2904 down-regulated 5%, U2932 up-regulated 1%, U2932 down-regulated 1%, U2932 up-regulated 5%, U2932 down-regulated 5%, Ri-1 1% vs 5% up-regulated, Ri-1 1% vs 5% down-regulated, U2904 1% vs 5% up-regulated, U2904 1% vs 5% down-regulated, U2932 1% vs 5% up-regulated, U2932 1% vs 5% down-regulated]
