# Supplementary material for: Proteomic-Based Analysis of Hypoxia- and Physioxia-Responsive Proteins and Pathways in Diffuse Large B-Cell Lymphoma
Source: Cells. 2021 Aug 8;10(8):2025. doi: 10.3390/cells10082025 (PMC8392495; doi:10.3390/cells10082025)
Supplement: Supplementary file 1 [file cells-10-02025-s001.zip › S3. DAPs overlapping in distinct cell lines..xlsx]

## Sheet: Overlapping in 1% and 5% vs 21%
Cell lines	Overlapping DAPs (No.)	Gene names
Ri-1 1% and Ri-1 5%	138	ESPL1
		KDM4A
		TPD52
		IRF4
		FARP1
		PSMA4
		MAP4
		CCDC25
		GNL3
		ERAL1
		PDCL3
		SUMO1
		AFF1
		PHIP
		CSNK1D;CSNK1E
		ZEB1
		PML
		SDHB
		DUS2
		FMR1
		ACAD8
		RIOK1
		G3BP2
		SQSTM1
		FPGS
		CAMSAP3
		UBA6
		SLC25A32
		TRIM41
		IFI44L
		EIF1
		NTHL1
		ZNF574
		SAP18
		GLTSCR2
		YME1L1
		TUBB6
		MRPS11
		WBSCR22
		ZBTB9
		VIMP
		SLC6A6
		SEC14L1
		UHRF2
		DDX6
		CLPTM1
		ARL14EP
		RPS3
		TXNRD1
		PSMC3IP
		SARS
		EHMT2
		ENDOG
		MAN2B1
		ERMP1
		LSM12
		LSG1
		TUBGCP4
		RP9
		GRN
		PICALM
		KBTBD4
		TST
		GRSF1
		FTL
		RDH14
		ITGB7
		ACSF2
		ECE1
		PEO1
		SGSH
		DDX51
		RAP2A
		PPFIBP2
		PRMT9
		NPRL3
		ALDH6A1
		CDC123
		RAF1
		QPCTL
		AIM1
		RAD51
		SH3KBP1
		JAK3
		PSMD13
		ZNF518B
		EIF4A2
		ATG7
		SART3
		RPP25L
		CTBP1
		ZNF593
		RPS29
		FDFT1
		NSL1
		B2M
		ERCC6L
		NFKBID
		SHPRH
		RPUSD4
		GRPEL2
		NCKAP5L
		PSMC3
		KDM6B
		CDK1;CDC2
		GPX4
		MARS2
		VPRBP
		PDCD2L
		C11orf84
		CTSZ
		ALDH7A1
		TRIT1
		CENPC
		CTSD
		RIOK3
		SNAPC3
		METTL17
		KDM3A
		C2orf43;LDAH
		ACTG1
		SESN2
		ANP32B
		DENND2D
		GOLGA4
		HSBP1
		TMEM205
		CAMK2G
		PPP1R7
		IFI44
		VGLL4
		C1orf109
		GNL2
		ISY1
		SCLY
		ZNF622
		RNASEH1
		CXCR5
U2904 1% and U2904 5%	128	GMPR2
		FH
		ERAL1
		VAMP8
		HMOX1
		KLHL14
		FASTKD3
		HNRNPD
		PTPRS
		TMEM9
		DDX28
		SERPINH1
		UBE2S
		RINT1
		CD276
		RTN4IP1
		CALM1;CALM2
		NGRN
		STAM
		SP110
		AMFR
		TSC1
		BIN3
		FXR2
		DNMBP
		HCCS
		PSMC2
		PRKD2
		TRUB2
		NIN
		TMEM222
		HNRNPDL
		SERPINB1
		IFI44L
		SETDB1
		ENSA
		AMMECR1L
		EVI2B
		B4GALT1
		SLC25A44
		PIGN
		LAGE3
		TAP1
		MAN2B1
		LSG1
		TUBGCP4
		TM6SF1
		CHEK2
		DBN1
		QTRTD1
		SUN1
		ANKLE2
		NR2C2
		POLE4
		PWP1
		PSMD4
		SMPD2
		FHL1
		FAM83H
		SELH;C11orf31
		TMEM87A
		ECE1
		FLOT2
		HDGFRP3
		EARS2
		SGSH
		ZMYM4
		AKAP8L
		ILK
		PRMT9
		OXNAD1
		MOCS3
		NAF1
		COBL
		GTPBP6
		CARS2
		NOLC1
		HLA-A
		ZNF414
		TSR1
		ADCK3
		CBX1
		CFDP1
		DDAH2
		C17orf80
		MAP2K1
		OXR1
		ATXN7
		CHCHD1
		ORMDL1
		ATP5C1
		EAF1
		ACO1
		PYCR1
		LARP4
		HAUS7
		GIPC1
		ARID4B
		GPX4
		HIBADH
		ST13;ST13P5
		CRTC1
		CTSZ
		ALDH7A1
		CASP7
		STYX
		TRANK1
		PPP1R18
		METTL17
		USP28
		WWOX
		ACTG1
		C8orf33
		SESN2
		FKBP11
		OASL
		CTTN
		INO80C
		PRR11
		PHKB
		EHHADH
		AMPD3
		MAT2A
		ZBTB40
		IFI44
		RPS6KA2
		C8orf82
		SLC25A24
U2932 1% and U2932 5%	112	CCDC167
		FER;Pe1Fe10
		NDUFS6
		ACSS1
		HMOX1
		ERI1
		AARS2
		PCED1B
		SHCBP1
		HMGB3
		FBXL6
		SDHB
		CMSS1
		CTAGE5
		RHOT1
		S100A4
		SQSTM1
		TSC1
		KDM5C
		AAMP
		TPP1
		UBE2C
		CNPY4
		LGALS1
		TMEM222
		CCDC137
		RPS6KA4
		GNPNAT1
		MMAA
		VIMP
		SEC14L1
		PSMD3
		ARL14EP
		SEC61G
		TRAF3
		ATP5J
		MFN2
		GCFC2
		ATAD3B
		CDK7
		NUDT16L1
		PI4K2B
		FAM98C
		MRPL40
		HIST1H1A
		HSPA4L
		HDHD2
		NDUFA7
		METAP2
		AHNAK
		ACSF3
		DHFR
		SYTL1
		ACO2
		ZBTB43
		MSMO1
		DNAJB2
		TRAPPC2L
		ANKRD12
		P4HA1
		TMEM128
		ALDH6A1
		TSPYL2
		LUC7L
		TIMM17A
		PRUNE
		GGPS1
		PSMC4
		PSMD13
		NCAPG2
		ZFPM1
		BZW1
		TANGO6
		DPP7
		EIF4A2
		DENND4B
		C3orf17
		TMX2
		TNK2
		PPP1R21
		MTCH1
		TUBGCP5
		ARHGEF18
		TMED5
		HIBADH
		STRAP
		HLA-C
		FKBP1A;FKBP12-Exip2
		PSME3
		NME3
		GPX1
		PYCR2
		NARS2
		KRT33B
		METTL17
		MCTP2
		NUMBL
		RFC4
		ME1
		PYROXD1
		RAB4B
		SURF2
		PHKB
		USP1
		PPP1R7
		ATP2A3
		DNAJC13
		CNST
		DARS2
		CDYL
		BLOC1S4
		HRNR

## Sheet: Shared DAPs-1% vs 21%
Cell lines	Overlapping DAPs No.	Gene names
Ri-1 1% , U2904 1%, U2932 1%	19	TRUB2
		SEC14L1
		CLPTM1
		PICALM
		ALDH6A1
		CCDC86
		PPT1
		AK4
		MMAA
		VIMP
		HMGCL
		GTPBP10
		SGSH
		EIF4A2
		CFDP1
		METTL17
		KDM3A
		DDX56
		PPP1R7
Ri-1 1% and U2904 1%	110	ERAL1
		PDCL3
		VAMP8
		MAX
		DUS2
		ELOVL5
		RIOK1
		EXT2
		NOM1
		SDAD1
		RSL24D1
		BIRC5
		FAM98A
		IKZF1
		NTHL1
		UHRF2
		GPI
		B4GALT1
		CHD3
		SARS
		DHX30
		MAN2B1
		LSG1
		FRYL
		ACSF2
		JADE1
		ECE1
		EIF4E2
		MOCS3
		MRTO4
		TBC1D2B
		COQ5
		CPD
		HLA-A
		EGLN1
		EIF2S1
		ZNF414
		B2M
		IMPAD1
		GFM1
		SHPRH
		TPGS1
		OXA1L
		GPX4
		ST13;ST13P5
		VPRBP
		PDCD2L
		ALDH7A1
		FASTKD2
		AMPD3
		GRAMD1A
		RPF2
		EIF4G1
		MOB3A
		GNL3L
		KDM5B
		PML
		UBE2S
		RTN4IP1
		AMFR
		CHD7
		DNMBP
		FXR2
		IFI44L
		SAP18
		TXNRD1
		ANKRD44
		MTFP1
		CRYZ
		ISG20
		MTHFD1L
		TUBGCP4
		ELF2
		DDX21
		POLE4
		TM9SF2
		NCKIPSD
		GPAM
		PEO1
		PRMT9
		FAM162A
		ZCCHC2
		GTPBP6
		MTERF3
		CNOT8
		NDUFS5
		IFIH1
		SNX8
		ERCC6L
		PRR12
		MBOAT7
		PFDN4
		TMEM199
		PSMA6
		CRTC1
		GPT2
		CTSZ
		SNAPC3
		NF2
		PHYHD1
		ACTG1
		GATM
		SESN2
		LRPAP1
		TUBB4A
		IFI44
		GNL2
		PDE12
		PSPH
		PDPK1;PDPK2P
Ri-1 1% and U2932 1%	70	ESPL1
		RRN3
		GNL3
		MMGT1
		KBTBD8
		CLUH
		SDHB
		RC3H1
		SQSTM1
		PDCD4
		TOR3A
		GLTSCR2
		MRPS11
		RAB3A
		TBC1D17
		MRPL28
		CEP120
		CASC3
		ERMP1
		SLC1A5
		REM2
		OVCA2
		IREB2
		PFKL
		STK38L
		AIM1
		FBLL1
		NCAPG2
		BZW1
		RARS2
		FAM193A
		DENND4B
		ZNF593
		CBS
		PARP4
		TYMS
		DDA1
		ERC2
		DNAJB6
		LCMT2
		HSDL1
		SRSF8
		C1orf109
		RERE
		TRAPPC13
		KDM4A
		IRF4
		HECTD1
		CNPY3
		G3BP2
		FPGS
		UBE2C
		FIGNL1
		ARL14EP
		SEC61G
		TNKS1BP1
		GEMIN7
		NOB1
		ADAT3
		ACAD10
		ACSF3
		TMEM128
		PDK1
		PSMD13
		CDC34
		RPP25L
		C11orf84
		POM121
		SMG9
		VGLL4
U2904 1% and U2932 1%	40	NDUFS6
		TMEM222
		CCDC137
		NPM1
		LAGE3
		TAP1
		WDR6
		SUN1
		MORC3
		ATG5
		ENO2
		BMS1
		RBL2
		ERLEC1
		NUMBL
		AKAP17A
		HMOX1
		PTPRS
		CENPE
		SP110
		TSC1
		HCCS
		PPME1
		UBL5
		CHEK2
		RPS19
		PWP1
		IFI35
		P4HA1
		MYO1G
		KMO
		HAUS7
		HIBADH
		BRD3
		FKBP11
		PHKB
		MAT2A
		URM1
		INCENP
		DARS2

## Sheet: Shared DAPs-5% vs 21%
Cell line	Overlapping DAPs No.	Gene names
Ri-1 5%, U2904 5%, U2932 5%	2	CARS2
		METTL17
Ri-1 5% and U2904 5%	40	ERAL1
		KLHL14
		PDLIM2
		NGRN
		SP110
		SERPINB1
		IFI44L
		PIGN
		MAN2B1
		TMEM177
		LSG1
		TUBGCP4
		PWP1
		TMEM87A
		ECE1
		PCCA
		EARS2
		SGSH
		RAP2A
		PRMT9
		CNDP2
		NOLC1
		NCOA2
		CHUK
		METTL5
		PANK1
		C14orf159
		TUBGCP6
		PYCR1
		RAB28
		GPX4
		CTSZ
		ALDH7A1
		ACTG1
		SESN2
		ANP32B
		DENND2D
		CTTN
		EHHADH
		IFI44
Ri-1 5% and U2932 5%	25	NDUFS6
		SDHB
		SQSTM1
		NTHL1
		RPS6KA4
		VIMP
		SEC14L1
		UHRF2
		ARL14EP
		XPNPEP3
		METAP2
		DHFR
		MSMO1
		ACSF2
		PPFIBP2
		ALDH6A1
		CTBP2
		QPCTL
		PSMD13
		SCD
		EIF4A2
		RBM3
		MCTP2
		CAMK2G
		PPP1R7
U2904 5% and U2932 5%	21	HMOX1
		ACADSB
		TSC1
		KDM5C
		TMEM222
		FERMT3
		PI4K2B
		NR2C2
		HSF1
		ZMYM4
		SP3
		THTPA
		ILK
		GTPBP6
		ZC3HAV1L
		TUBGCP5
		HIBADH
		ST13;ST13P5
		GPX1
		PYCR2
		PHKB

## Sheet: Shared DAPs -1% vs 5%
Cell line	Overlapping DAPs No.	Gene names
Ri-1 1%, U2904 1%, U2932 1%	2	MYO16
		KDM3A
Ri-1 1% and U2904 1%	35	KDM5B
		CYTH1
		UBE2S
		F13A1
		RIOK1
		CSGALNACT2
		PCNP
		SDC1
		AZGP1
		SEC14L1
		GPI
		CEP120
		CRYZ
		ASNS
		HSPA4
		KIF15
		NCKIPSD
		DDX3X;DDX3Y
		HLA-DMA
		DNAJB12
		HMMR
		NAA50
		LAPTM5
		EGLN1
		C14orf159
		IMPAD1
		MEF2B
		CIR1
		HIP1
		TRUB1
		SNAPC3
		ETV6
		PHYHD1
		SKA1
		ACTR2
Ri-1 1% and U2932 1%	26	SOS1
		AAR2
		SFXN2
		REEP3
		NOB1
		SLC16A3
		RPS19
		PFKL
		TMPO
		B4GALT3
		CLSPN
		KIF20A
		RPUSD4
		MRPL42
		PARP4
		TCEB3
		ETNK1
		RCN1
		POM121
		ZGPAT
		SMG9
		GALNT10
		INTS3
		ZNF316
		PITPNM1
		NDE1
U2904 1% and U2932 1%	21	PGK2
		BANK1
		RPS10
		DDX31
		HMOX2
		AK4
		CDKN1B
		REC8
		HLA-DQB1
		P4HA1
		METTL10
		AIM1
		CHCHD6
		BARD1
		CDC26
		SPATA33
		PFKFB3
		TTC4
		METTL17
		KRT6A
		ACADS
