# Supplementary material for: Proteomic-Based Analysis of Hypoxia- and Physioxia-Responsive Proteins and Pathways in Diffuse Large B-Cell Lymphoma
Source: Cells. 2021 Aug 8;10(8):2025. doi: 10.3390/cells10082025 (PMC8392495; doi:10.3390/cells10082025)
Supplement: Supplementary file 1 [file cells-10-02025-s001.zip › S4.Pathways enriched in Ri-1 cell line..xlsx]

## Sheet: up-regulated
Gene Ontology ID	Gene Ontology: Biological Processes	Nr. Proteins	% Proteins	p-value	p-value corrected with Bonferroni step down	Proteins
GO:0006119	oxidative phosphorylation	8	5.194805	3.335951366174501E-4	0.02768839633924836	[AK4, CDK1, DMAC2L, NDUFB8, NDUFS2, NDUFS4, NDUFS5, SDHA]
GO:0022904	respiratory electron transport chain	7	5.8333335	3.9200357973715946E-4	0.02979227206002412	[CDK1, NDUFB8, NDUFS2, NDUFS4, NDUFS5, SDHA, SDHB]
GO:0031109	microtubule polymerization or depolymerization	7	5.46875	5.781701720790348E-4	0.037002891013058224	[CAMSAP3, CDKN1B, HDAC6, PAK1, RPS3, TUBB4A, TUBGCP4]
GO:0031110	regulation of microtubule polymerization or depolymerization	6	6.25	7.117063146417728E-4	0.04341408519314814	[CAMSAP3, CDKN1B, HDAC6, PAK1, RPS3, TUBB4A]
GO:0031113	regulation of microtubule polymerization	5	8.474576	4.991658919453372E-4	0.03444244654422827	[CAMSAP3, CDKN1B, PAK1, RPS3, TUBB4A]
GO:0046785	microtubule polymerization	6	7.0588236	3.714010599037715E-4	0.028969282672494177	[CAMSAP3, CDKN1B, PAK1, RPS3, TUBB4A, TUBGCP4]
GO:0006220	pyrimidine nucleotide metabolic process	6	8.955224	1.0000048785932457E-4	0.009900048298073132	[AGPAT3, AK4, DTYMK, DUT, NTHL1, UNG]
GO:0006244	pyrimidine nucleotide catabolic process	3	23.076923	3.5762094952927433E-4	0.02896729691187122	[DUT, NTHL1, UNG]
GO:0009219	pyrimidine deoxyribonucleotide metabolic process	4	21.052631	5.0604514491638805E-5	0.005262869507130436	[DTYMK, DUT, NTHL1, UNG]
GO:0009223	pyrimidine deoxyribonucleotide catabolic process	3	25.0	2.773631283993661E-4	0.02440795529914422	[DUT, NTHL1, UNG]
GO:0009262	deoxyribonucleotide metabolic process	4	11.428572	5.947759764083797E-4	0.03747088651372792	[DTYMK, DUT, NTHL1, UNG]
GO:0009394	2'-deoxyribonucleotide metabolic process	4	12.903226	3.700525100017755E-4	0.029234148290140264	[DTYMK, DUT, NTHL1, UNG]
GO:0019692	deoxyribose phosphate metabolic process	4	12.121212	4.7296358594504565E-4	0.03310745101615319	[DTYMK, DUT, NTHL1, UNG]
GO:0072527	pyrimidine-containing compound metabolic process	7	6.4814816	2.054998559124963E-4	0.019316986455774652	[AGPAT3, AK4, ALDH6A1, DTYMK, DUT, NTHL1, UNG]
GO:0006482	protein demethylation	4	11.764706	5.313926723654656E-4	0.035071916376120726	[KDM3A, KDM4A, KDM5B, KDM6B]
GO:0008214	protein dealkylation	4	11.764706	5.313926723654656E-4	0.035071916376120726	[KDM3A, KDM4A, KDM5B, KDM6B]
GO:0016577	histone demethylation	4	12.5	4.192594679764182E-4	0.031025200630254948	[KDM3A, KDM4A, KDM5B, KDM6B]
GO:0032452	histone demethylase activity	4	13.333333	3.251166044941649E-4	0.02763491138200402	[KDM3A, KDM4A, KDM5B, KDM6B]
GO:0051213	dioxygenase activity	6	6.25	7.117063146417728E-4	0.04341408519314814	[EGLN1, KDM3A, KDM4A, KDM5B, KDM6B, PHYHD1]
GO:0060992	response to fungicide	3	21.428572	4.514306496428602E-4	0.032503006774285935	[EHMT2, KDM5B, KDM6B]
GO:0070076	histone lysine demethylation	4	12.903226	3.700525100017755E-4	0.029234148290140264	[KDM3A, KDM4A, KDM5B, KDM6B]
GO:0140457	protein demethylase activity	4	13.333333	3.251166044941649E-4	0.02763491138200402	[KDM3A, KDM4A, KDM5B, KDM6B]
GO:0006520	cellular amino acid metabolic process	19	5.135135	3.434948697570192E-8	4.0188899761571244E-6	[ALDH6A1, ALDH7A1, BCAT2, BPHL, HECA, HIBCH, HMGCL, KYAT1, PARS2, PSMA6, PSMB5, PSMC1, PSMC3, PSMD11, PSMD13, SARS1, SCLY, TST, VARS1]
GO:0009308	amine metabolic process	9	5.9602647	4.946194088433954E-5	0.005193503792855652	[ALDH7A1, HECA, KYAT1, PSMA6, PSMB5, PSMC1, PSMC3, PSMD11, PSMD13]
GO:0044106	cellular amine metabolic process	9	6.382979	2.8855705639698153E-5	0.0031452719147270986	[ALDH7A1, HECA, KYAT1, PSMA6, PSMB5, PSMC1, PSMC3, PSMD11, PSMD13]
GO:0006573	valine metabolic process	3	50.0	2.64916972508963E-5	0.002914086697598593	[ALDH6A1, BCAT2, HIBCH]
GO:0009063	cellular amino acid catabolic process	9	6.25	3.407990473771561E-5	0.0036806297116732858	[ALDH6A1, ALDH7A1, BCAT2, HECA, HIBCH, HMGCL, KYAT1, SCLY, TST]
GO:0009081	branched-chain amino acid metabolic process	4	16.0	1.5674292464655377E-4	0.014890577841422607	[ALDH6A1, BCAT2, HIBCH, HMGCL]
GO:0009083	branched-chain amino acid catabolic process	4	16.0	1.5674292464655377E-4	0.014890577841422607	[ALDH6A1, BCAT2, HIBCH, HMGCL]
GO:1901605	alpha-amino acid metabolic process	10	4.385965	2.443044440638923E-4	0.021987399965750307	[ALDH6A1, ALDH7A1, BCAT2, HECA, HIBCH, HMGCL, KYAT1, SARS1, SCLY, TST]
GO:1901606	alpha-amino acid catabolic process	8	6.557377	6.66238509502805E-5	0.006862256647878891	[ALDH6A1, ALDH7A1, BCAT2, HECA, HIBCH, HMGCL, KYAT1, SCLY]
GO:0001736	establishment of planar polarity	7	5.223881	7.592322759116794E-4	0.04555393655470077	[AP2A2, PSMA6, PSMB5, PSMC1, PSMC3, PSMD11, PSMD13]
GO:0001738	morphogenesis of a polarized epithelium	9	5.732484	6.69646251133679E-5	0.006830391761563525	[ACTG1, AP2A2, CAMSAP3, PSMA6, PSMB5, PSMC1, PSMC3, PSMD11, PSMD13]
GO:0002220	innate immune response activating cell surface receptor signaling pathway	7	5.7377048	4.3325095603156656E-4	0.03162731979030436	[PAK1, PSMA6, PSMB5, PSMC1, PSMC3, PSMD11, PSMD13]
GO:0002223	stimulatory C-type lectin receptor signaling pathway	7	5.882353	3.725929036347572E-4	0.028689653579876302	[PAK1, PSMA6, PSMB5, PSMC1, PSMC3, PSMD11, PSMD13]
GO:0002474	antigen processing and presentation of peptide antigen via MHC class I	8	7.8431373	1.8335574709253463E-5	0.002053584367436388	[B2M, PSMA6, PSMB5, PSMC1, PSMC3, PSMD11, PSMD13, VAMP8]
GO:0002478	antigen processing and presentation of exogenous peptide antigen	9	4.864865	2.3287634360246758E-4	0.02119174726782455	[AP2A2, B2M, PSMA6, PSMB5, PSMC1, PSMC3, PSMD11, PSMD13, VAMP8]
GO:0002479	antigen processing and presentation of exogenous peptide antigen via MHC class I, TAP-dependent	8	10.0	2.9859747091501945E-6	3.463730662614226E-4	[B2M, PSMA6, PSMB5, PSMC1, PSMC3, PSMD11, PSMD13, VAMP8]
GO:0002758	innate immune response-activating signal transduction	7	5.6910567	4.551357930705097E-4	0.03231464130800619	[PAK1, PSMA6, PSMB5, PSMC1, PSMC3, PSMD11, PSMD13]
GO:0006521	regulation of cellular amino acid metabolic process	6	8.955224	1.0000048785932457E-4	0.009900048298073132	[PSMA6, PSMB5, PSMC1, PSMC3, PSMD11, PSMD13]
GO:0007164	establishment of tissue polarity	7	5.223881	7.592322759116794E-4	0.04555393655470077	[AP2A2, PSMA6, PSMB5, PSMC1, PSMC3, PSMD11, PSMD13]
GO:0010389	regulation of G2/M transition of mitotic cell cycle	9	4.347826	5.306304366622502E-4	0.035552239256370764	[CDK1, PCNT, PSMA6, PSMB5, PSMC1, PSMC3, PSMD11, PSMD13, TUBB4A]
GO:0010972	negative regulation of G2/M transition of mitotic cell cycle	7	7.216495	1.049223477933519E-4	0.010177467735955134	[CDK1, PSMA6, PSMB5, PSMC1, PSMC3, PSMD11, PSMD13]
GO:0019884	antigen processing and presentation of exogenous antigen	9	4.6391754	3.308895695301564E-4	0.027794723840533136	[AP2A2, B2M, PSMA6, PSMB5, PSMC1, PSMC3, PSMD11, PSMD13, VAMP8]
GO:0031145	anaphase-promoting complex-dependent catabolic process	8	9.523809	4.323399384894681E-6	4.971909292628883E-4	[BUB3, CDK1, PSMA6, PSMB5, PSMC1, PSMC3, PSMD11, PSMD13]
GO:0031146	SCF-dependent proteasomal ubiquitin-dependent protein catabolic process	6	6.25	7.117063146417728E-4	0.04341408519314814	[PSMA6, PSMB5, PSMC1, PSMC3, PSMD11, PSMD13]
GO:0033238	regulation of cellular amine metabolic process	6	6.976744	3.956079815679897E-4	0.029670598617599228	[PSMA6, PSMB5, PSMC1, PSMC3, PSMD11, PSMD13]
GO:0035567	non-canonical Wnt signaling pathway	8	5.1282053	3.638407234996843E-4	0.029107257879974743	[AP2A2, GPI, PSMA6, PSMB5, PSMC1, PSMC3, PSMD11, PSMD13]
GO:0036294	cellular response to decreased oxygen levels	11	4.9773755	3.8558385752164355E-5	0.004125747275481586	[AK4, BBC3, EGLN1, FAM162A, PDK1, PSMA6, PSMB5, PSMC1, PSMC3, PSMD11, PSMD13]
GO:0038061	NIK/NF-kappaB signaling	8	4.6511626	6.953471292097465E-4	0.04311152201100429	[PDCD4, PSMA6, PSMB5, PSMC1, PSMC3, PSMD11, PSMD13, RPS3]
GO:0042590	antigen processing and presentation of exogenous peptide antigen via MHC class I	8	9.411765	4.72751116334086E-6	5.38936272620858E-4	[B2M, PSMA6, PSMB5, PSMC1, PSMC3, PSMD11, PSMD13, VAMP8]
GO:0043618	regulation of transcription from RNA polymerase II promoter in response to stress	8	6.451613	7.474603159660395E-5	0.007549349191256998	[EGLN1, MAPK7, PSMA6, PSMB5, PSMC1, PSMC3, PSMD11, PSMD13]
GO:0043620	regulation of DNA-templated transcription in response to stress	8	6.1538463	1.041948425801449E-4	0.0102110945728542	[EGLN1, MAPK7, PSMA6, PSMB5, PSMC1, PSMC3, PSMD11, PSMD13]
GO:0048002	antigen processing and presentation of peptide antigen	10	4.901961	9.869160026573512E-5	0.00986916002657351	[AP2A2, AZGP1, B2M, PSMA6, PSMB5, PSMC1, PSMC3, PSMD11, PSMD13, VAMP8]
GO:0060071	Wnt signaling pathway, planar cell polarity pathway	7	6.034483	3.1893254159905723E-4	0.02774713111911798	[AP2A2, PSMA6, PSMB5, PSMC1, PSMC3, PSMD11, PSMD13]
GO:0060218	hematopoietic stem cell differentiation	6	6.521739	5.678727112824375E-4	0.03691172623335844	[PSMA6, PSMB5, PSMC1, PSMC3, PSMD11, PSMD13]
GO:0061418	regulation of transcription from RNA polymerase II promoter in response to hypoxia	7	8.333333	4.177807030399192E-5	0.004428475452223144	[EGLN1, PSMA6, PSMB5, PSMC1, PSMC3, PSMD11, PSMD13]
GO:0070498	interleukin-1-mediated signaling pathway	7	6.930693	1.3532450863243972E-4	0.012991152828714214	[IRAK4, PSMA6, PSMB5, PSMC1, PSMC3, PSMD11, PSMD13]
GO:0071453	cellular response to oxygen levels	12	5.0209203	1.5682233712390136E-5	0.0017720924095000854	[AK4, ATG7, BBC3, EGLN1, FAM162A, PDK1, PSMA6, PSMB5, PSMC1, PSMC3, PSMD11, PSMD13]
GO:0071456	cellular response to hypoxia	11	5.21327	2.520377672829996E-5	0.0027976192168412957	[AK4, BBC3, EGLN1, FAM162A, PDK1, PSMA6, PSMB5, PSMC1, PSMC3, PSMD11, PSMD13]
GO:0090175	regulation of establishment of planar polarity	7	5.9322033	3.5395948028041623E-4	0.02902467738299413	[AP2A2, PSMA6, PSMB5, PSMC1, PSMC3, PSMD11, PSMD13]
GO:1901532	regulation of hematopoietic progenitor cell differentiation	6	6.521739	5.678727112824375E-4	0.03691172623335844	[PSMA6, PSMB5, PSMC1, PSMC3, PSMD11, PSMD13]
GO:1901991	negative regulation of mitotic cell cycle phase transition	10	4.237288	3.217081485761466E-4	0.027666900777548607	[BUB3, CDK1, CDKN1B, MYO16, PSMA6, PSMB5, PSMC1, PSMC3, PSMD11, PSMD13]
GO:1902036	regulation of hematopoietic stem cell differentiation	6	7.6923075	2.326048517799113E-4	0.02139964636375184	[PSMA6, PSMB5, PSMC1, PSMC3, PSMD11, PSMD13]
GO:1902750	negative regulation of cell cycle G2/M phase transition	7	6.25	2.572179307445222E-4	0.022892395836262475	[CDK1, PSMA6, PSMB5, PSMC1, PSMC3, PSMD11, PSMD13]
GO:2000736	regulation of stem cell differentiation	7	5.5555553	5.261321234045739E-4	0.03577698439151102	[KDM3A, PSMA6, PSMB5, PSMC1, PSMC3, PSMD11, PSMD13]

## Sheet: down-regulatd
Gene Ontology ID	Gene Ontology: Biological Processes	Nr. Proteins	% Proteins	p-value	p-value corrected with Bonferroni step down	Proteins
GO:0000083	regulation of transcription involved in G1/S transition of mitotic cell cycle	7	19.444445	4.062986879715556E-5	0.021208791512115202	[CDK14, CDK15, CDK16, E2F6, TFDP1, TYMS, ZPR1]
GO:0000959	mitochondrial RNA metabolic process	9	19.148935	3.6677298724304846E-6	0.0019512322921330179	[ELAC2, FASTKD1, GRSF1, MTERF3, MTO1, PDE12, TRIT1, TRMT5, TWNK]
GO:1903047	mitotic cell cycle process	47	5.2164264	1.689779454383285E-5	0.008905137724599914	[BCAT1, BIRC5, CCNB1, CDC34, CDK14, CDK15, CDK16, CHMP1A, CHMP6, CKS2, CLSPN, CNOT8, CSNK1D, CSNK1E, E2F6, EIF4G1, EMD, ESPL1, JADE1, KIF18B, KIF20A, LPIN1, MAD2L1, MAP4, MAX, NOP53, PHIP, PLK1, PML, POLE4, PPP2R2A, PSMA4, PSMG2, RAD51, REEP3, SAPCD2, SETD2, SPAG5, TACC1, TFDP1, TNKS1BP1, TYMS, UBE2C, UBE2S, USP16, ZNF207, ZPR1]
GO:0006997	nucleus organization	16	11.510792	1.0219310348406612E-6	5.48776965709435E-4	[CCNB1, CHMP1A, CHMP6, EMD, FAM118B, LPIN1, NUP35, PLK1, PML, PPP2R2A, REEP3, RRN3, SERBP1, SF1, SRPK1, ZPR1]
GO:0030575	nuclear body organization	5	27.777779	8.719536013364165E-5	0.04534158726949366	[FAM118B, PML, SERBP1, SF1, ZPR1]
GO:0032446	protein modification by small protein conjugation	50	5.0916495	1.479013044266272E-5	0.007809188873725916	[AMFR, CDC34, CTU2, DCAF1, DCUN1D5, DDA1, FBXL19, FBXO11, GNL3, GNL3L, GPS2, GTPBP4, HDAC3, HECTD1, HERPUD1, HLA-A, IFIH1, IRF2BP2, IVNS1ABP, KBTBD8, MAD2L1, MED31, MOCS3, MYO1C, NFX1, NSMCE1, NUP35, PELI1, PEX5, PLK1, PML, POM121, PRMT3, PSMA4, RANGAP1, RC3H1, RNF114, RNF5, SELENOS, SQSTM1, SUMO3, SUMO4, TRAF2, TRIM26, TRIM41, UBE2C, UBE2R2, UBE2S, UBE2T, ZNRF2]
GO:0070647	protein modification by small protein conjugation or removal	60	5.0125313	2.7073952699362655E-6	0.0014430416788760296	[AMFR, CDC34, CLSPN, CTU2, DCAF1, DCUN1D5, DDA1, FBXL19, FBXO11, GNL3, GNL3L, GPS2, GTPBP4, HDAC3, HECTD1, HERPUD1, HLA-A, IFIH1, IRF2BP2, IVNS1ABP, KBTBD8, MAD2L1, MED31, MOCS3, MYO1C, NFRKB, NFX1, NOP53, NSMCE1, NUP35, OTUD4, PELI1, PEX5, PLK1, PML, POM121, PRMT3, PSMA4, RANGAP1, RC3H1, RNF114, RNF5, SELENOS, SHMT1, SQSTM1, SUMO3, SUMO4, TOMM20, TRAF2, TRIM26, TRIM41, UBE2C, UBE2R2, UBE2S, UBE2…
GO:0001510	RNA methylation	10	11.764706	9.072832613974652E-5	0.0469972729403887	[BUD23, FBLL1, LCMT2, METTL2A, METTL2B, MTO1, NSUN6, TGS1, THUMPD3, TRMT5]
GO:0009451	RNA modification	20	11.560694	4.279869703460783E-8	2.3368088580895878E-5	[ADAT3, BUD23, CDKAL1, CTU2, DUS2, DUS3L, FBLL1, LCMT2, METTL2A, METTL2B, MOCS3, MTO1, NSUN6, RPUSD4, TGS1, THUMPD3, TRIT1, TRMT5, TRUB1, TRUB2]
GO:0043414	macromolecule methylation	22	6.6666665	8.912493916174125E-5	0.04625584342494371	[AUTS2, BUD23, ECE2, FAM98A, FAM98B, FBLL1, FBXO11, KMT2D, LCMT2, METTL2A, METTL2B, MIS18A, MTO1, NSUN6, PRMT3, PRMT9, SETD1A, SETD2, SETD3, TGS1, THUMPD3, TRMT5]
GO:0008276	protein methyltransferase activity	11	11.827957	3.871076130267611E-5	0.020245728161299607	[ECE2, FAM98A, FAM98B, FBLL1, FBXO11, KMT2D, PRMT3, PRMT9, SETD1A, SETD2, SETD3]
GO:0006396	RNA processing	92	9.330628	1.7601791267721954E-26	1.0068224605136958E-23	[AAR2, ADAT1, ADAT3, AHCYL1, AQR, ARL6IP4, BUD23, BYSL, C1D, CACTIN, CASC3, CCDC130, CCNB1, CCNL1, CDKAL1, CHD7, CLK2, CLNS1A, CTU2, CWC25, DDX10, DDX20, DDX51, DDX56, DUS2, DUS3L, EBNA1BP2, ELAC2, ESF1, EXOSC8, FAM98B, FBLL1, FBXO11, FXR2, GEMIN6, GEMIN7, GPKOW, GRSF1, GTF2H1, GTPBP4, IMP3, ISY1, IVNS1ABP, LCMT2, MBNL1, METTL2A, METTL2B, MOCS3, MRTO4, MTO1, MTPAP, NIFK, NOB1, NOL10, NOP53, NSA2,…
GO:0016070	RNA metabolic process	213	4.4375	6.220515459299911E-17	3.50215020358585E-14	[AAR2, ADAT1, ADAT3, AFF1, AHCYL1, AQR, ARL6IP4, AUTS2, BAZ1A, BIRC5, BOLA1, BUD23, BYSL, C1D, CACTIN, CARD11, CASC3, CCDC130, CCNB1, CCNL1, CD40, CDK14, CDK15, CDK16, CDKAL1, CHD7, CHMP1A, CKS2, CLK2, CLNS1A, CNOT8, CREG1, CRTC1, CTU2, CWC25, DCAF1, DDX10, DDX20, DDX51, DDX56, DHX33, DNAJA3, DNAJB6, DNAJC2, DTD1, DUS2, DUS3L, E2F6, EBNA1BP2, EIF2A, EIF4G1, ELAC2, ELF2, ENDOG, ESF1, ETV6, EXOSC8,…
GO:0006139	nucleobase-containing compound metabolic process	248	4.2270327	6.096162062223345E-18	3.44433156515619E-15	[AAR2, ACTN3, ADAT1, ADAT3, ADPRS, AFF1, AHCYL1, AK6, AQR, ARL6IP4, AUTS2, BAZ1A, BIRC5, BOLA1, BPNT2, BUD23, BYSL, C1D, CACTIN, CARD11, CASC3, CBS, CCDC130, CCNB1, CCNL1, CD40, CDC34, CDK14, CDK15, CDK16, CDKAL1, CHD7, CHMP1A, CKS2, CLK2, CLNS1A, CLSPN, CNOT8, CREG1, CRTC1, CSNK1E, CTU2, CWC25, DCAF1, DDX10, DDX20, DDX51, DDX56, DHODH, DHX33, DNAJA3, DNAJB6, DNAJC2, DTD1, DUS2, DUS3L, E2F6, EBNA…
GO:0006725	cellular aromatic compound metabolic process	252	4.13318	7.078101882301184E-17	3.977893257853266E-14	[AAR2, ACTN3, ADAT1, ADAT3, ADPRS, AFF1, AHCYL1, AK6, AQR, ARL6IP4, AUTS2, BAZ1A, BIRC5, BOLA1, BPNT2, BUD23, BYSL, C1D, CACTIN, CARD11, CASC3, CBS, CCDC130, CCNB1, CCNL1, CD40, CDC34, CDK14, CDK15, CDK16, CDKAL1, CHD7, CHMP1A, CKS2, CLK2, CLNS1A, CLSPN, CNOT8, COMT, CREG1, CRTC1, CSNK1E, CTU2, CWC25, DCAF1, DDX10, DDX20, DDX51, DDX56, DHODH, DHX33, DNAJA3, DNAJB6, DNAJC2, DTD1, DUS2, DUS3L, E2F6…
GO:0010467	gene expression	258	4.307898	3.456517170343475E-20	1.9702147870957807E-17	[AAR2, ADAT1, ADAT3, AFF1, AHCYL1, ANXA7, AQR, ARL6IP4, AUTS2, B2M, BAZ1A, BIRC5, BOLA1, BST2, BUD23, BYSL, C1D, CACTIN, CARD11, CASC3, CCDC130, CCDC88B, CCNB1, CCNL1, CD40, CD83, CDC123, CDK14, CDK15, CDK16, CDKAL1, CHD7, CHMP1A, CKS2, CLK2, CLNS1A, CNOT8, CPD, CREG1, CRTC1, CSNK1D, CSNK1E, CTSZ, CTU2, CWC25, DCAF1, DDX10, DDX20, DDX51, DDX56, DHCR24, DHX33, DNAJA3, DNAJB6, DNAJC2, DOHH, DTD1, D…
GO:0034641	cellular nitrogen compound metabolic process	276	4.169184	4.229856627074222E-20	2.4067884208052326E-17	[AAR2, ACTN3, ADAT1, ADAT3, ADPRS, AFF1, AHCYL1, AK6, AQR, ARL6IP4, AUTS2, B4GALT3, BAZ1A, BIRC5, BOLA1, BPNT2, BUD23, BYSL, C1D, CACTIN, CARD11, CASC3, CBS, CCDC130, CCNB1, CCNL1, CD40, CDC123, CDC34, CDK14, CDK15, CDK16, CDKAL1, CHD7, CHMP1A, CKS2, CLK2, CLNS1A, CLSPN, CNOT8, COMT, CPD, CREG1, CRTC1, CSNK1E, CTSZ, CTU2, CWC25, DCAF1, DDX10, DDX20, DDX51, DDX56, DHODH, DHX33, DNAJA3, DNAJB6, DNA…
GO:0046483	heterocycle metabolic process	251	4.1487603	4.137585047827921E-17	2.333597966974947E-14	[AAR2, ACTN3, ADAT1, ADAT3, ADPRS, AFF1, AHCYL1, AK6, AQR, ARL6IP4, AUTS2, BAZ1A, BIRC5, BOLA1, BPNT2, BUD23, BYSL, C1D, CACTIN, CARD11, CASC3, CBS, CCDC130, CCNB1, CCNL1, CD40, CDC34, CDK14, CDK15, CDK16, CDKAL1, CHD7, CHMP1A, CKS2, CLK2, CLNS1A, CLSPN, CNOT8, CREG1, CRTC1, CSNK1E, CTU2, CWC25, DCAF1, DDX10, DDX20, DDX51, DDX56, DHODH, DHX33, DNAJA3, DNAJB6, DNAJC2, DTD1, DUS2, DUS3L, E2F6, EBNA…
GO:0090304	nucleic acid metabolic process	232	4.36747	4.1485130484862914E-18	2.348058385443241E-15	[AAR2, ADAT1, ADAT3, ADPRS, AFF1, AHCYL1, AQR, ARL6IP4, AUTS2, BAZ1A, BIRC5, BOLA1, BUD23, BYSL, C1D, CACTIN, CARD11, CASC3, CBS, CCDC130, CCNB1, CCNL1, CD40, CDC34, CDK14, CDK15, CDK16, CDKAL1, CHD7, CHMP1A, CKS2, CLK2, CLNS1A, CLSPN, CNOT8, CREG1, CRTC1, CSNK1E, CTU2, CWC25, DCAF1, DDX10, DDX20, DDX51, DDX56, DHX33, DNAJA3, DNAJB6, DNAJC2, DTD1, DUS2, DUS3L, E2F6, EBNA1BP2, EIF2A, EIF4G1, ELAC2…
GO:1901360	organic cyclic compound metabolic process	255	4.022082	1.167807674292622E-15	6.55140105278161E-13	[AAR2, ACTN3, ADAT1, ADAT3, ADPRS, AFF1, AHCYL1, AK6, AQR, ARL6IP4, AUTS2, BAZ1A, BIRC5, BOLA1, BPNT2, BUD23, BYSL, C1D, CACTIN, CARD11, CASC3, CBS, CCDC130, CCNB1, CCNL1, CD40, CDC34, CDK14, CDK15, CDK16, CDKAL1, CHD7, CHMP1A, CKS2, CLK2, CLNS1A, CLSPN, CNOT8, COMT, CREG1, CRTC1, CSNK1E, CTU2, CWC25, DCAF1, DDX10, DDX20, DDX51, DDX56, DHCR24, DHODH, DHX33, DNAJA3, DNAJB6, DNAJC2, DTD1, DUS2, DUS…
GO:0006401	RNA catabolic process	30	6.960557	2.038711294510612E-6	0.0010907105425631775	[CASC3, CNOT8, EIF4G1, EXOSC8, FASTKD1, FXR2, GRSF1, GSPT2, MRTO4, MTPAP, PDE12, PELO, PPP2R2A, PSMA4, RC3H1, RDH14, RNASEH1, RPL6, RPS29, RPS5, RSL24D1, SAMD4B, SERBP1, SMG9, TENT4B, TNKS1BP1, TNRC6B, VIM, YBX1, ZPR1]
GO:0006402	mRNA catabolic process	28	7.216495	2.238811926029656E-6	0.0011955255684998362	[CASC3, CNOT8, EIF4G1, EXOSC8, FASTKD1, FXR2, GSPT2, MRTO4, MTPAP, PDE12, PELO, PPP2R2A, PSMA4, RC3H1, RDH14, RNASEH1, RPL6, RPS29, RPS5, RSL24D1, SAMD4B, SERBP1, SMG9, TENT4B, TNKS1BP1, TNRC6B, VIM, YBX1]
GO:0010608	posttranscriptional regulation of gene expression	37	5.323741	9.500963535554622E-5	0.04902497184346185	[CASC3, CDC123, CNOT8, EEF1B2, EIF1, EIF2A, EIF3K, EIF4E2, EIF4G1, EXOSC8, FASTKD1, FASTKD2, FXR2, GFM1, GSPT2, IREB2, KBTBD8, MALSU1, NUP35, PDE12, POM121, PSMA4, RC3H1, RPUSD4, SAMD4B, SERBP1, SESN2, SHMT1, STAT3, TENT4B, TNRC6B, TRUB2, TYMS, USP16, VIM, YBX1, ZC3H7B]
GO:0006412	translation	46	6.705539	1.660610307996329E-8	9.149962797059774E-6	[CASC3, CDC123, CDKAL1, CNOT8, DHX33, DTD1, EEF1B2, EIF1, EIF2A, EIF3K, EIF4E2, EIF4G1, ERAL1, FASTKD2, FXR2, GFM1, GSPT2, IREB2, KBTBD8, MALSU1, MARS2, MRPL11, MRPL14, MRPL21, MRPL28, MRPL37, MRPL42, MRPL53, OXA1L, RARS2, RC3H1, RPL6, RPS29, RPS5, RPUSD4, RSL24D1, SAMD4B, SESN2, SHMT1, STAT3, TNRC6B, TRUB2, TYMS, USP16, VIM, YBX1]
GO:0006417	regulation of translation	28	6.5268064	2.2313237188301207E-5	0.011736762761046435	[CASC3, CDC123, CNOT8, EEF1B2, EIF1, EIF2A, EIF3K, EIF4E2, EIF4G1, FASTKD2, FXR2, GFM1, GSPT2, IREB2, KBTBD8, MALSU1, RC3H1, RPUSD4, SAMD4B, SESN2, SHMT1, STAT3, TNRC6B, TRUB2, TYMS, USP16, VIM, YBX1]
GO:0006518	peptide metabolic process	51	5.8285713	2.3641513664792534E-7	1.279005889265276E-4	[CASC3, CDC123, CDKAL1, CNOT8, CPD, CTSZ, DHX33, DTD1, ECE1, ECE2, EEF1B2, EIF1, EIF2A, EIF3K, EIF4E2, EIF4G1, ERAL1, FASTKD2, FXR2, GFM1, GPX4, GSPT2, IREB2, KBTBD8, MALSU1, MARS2, MRPL11, MRPL14, MRPL21, MRPL28, MRPL37, MRPL42, MRPL53, OXA1L, RARS2, RC3H1, RPL6, RPS29, RPS5, RPUSD4, RSL24D1, SAMD4B, SESN2, SHMT1, STAT3, TNRC6B, TRUB2, TYMS, USP16, VIM, YBX1]
GO:0017148	negative regulation of translation	14	9.859155	2.8808937295056804E-5	0.015124692079904823	[CNOT8, EIF4E2, EIF4G1, FXR2, IREB2, MALSU1, RC3H1, SAMD4B, SESN2, SHMT1, STAT3, TNRC6B, TYMS, YBX1]
GO:0032543	mitochondrial translation	15	10.869565	4.559863829710887E-6	0.00241672782974677	[ERAL1, FASTKD2, GFM1, MALSU1, MRPL11, MRPL14, MRPL21, MRPL28, MRPL37, MRPL42, MRPL53, OXA1L, RARS2, RPUSD4, TRUB2]
GO:0043043	peptide biosynthetic process	46	6.4335666	4.127906249412331E-8	2.257964718428545E-5	[CASC3, CDC123, CDKAL1, CNOT8, DHX33, DTD1, EEF1B2, EIF1, EIF2A, EIF3K, EIF4E2, EIF4G1, ERAL1, FASTKD2, FXR2, GFM1, GSPT2, IREB2, KBTBD8, MALSU1, MARS2, MRPL11, MRPL14, MRPL21, MRPL28, MRPL37, MRPL42, MRPL53, OXA1L, RARS2, RC3H1, RPL6, RPS29, RPS5, RPUSD4, RSL24D1, SAMD4B, SESN2, SHMT1, STAT3, TNRC6B, TRUB2, TYMS, USP16, VIM, YBX1]
GO:0043603	cellular amide metabolic process	60	5.1150894	1.3436794876026222E-6	7.202122053550055E-4	[B4GALT3, CASC3, CDC123, CDKAL1, CNOT8, CPD, CTSZ, DHX33, DTD1, ECE1, ECE2, EEF1B2, EIF1, EIF2A, EIF3K, EIF4E2, EIF4G1, ELOVL5, ERAL1, FASTKD2, FPGS, FXR2, GFM1, GPAM, GPX4, GSPT2, IREB2, KBTBD8, MALSU1, MARS2, MRPL11, MRPL14, MRPL21, MRPL28, MRPL37, MRPL42, MRPL53, MTHFD1L, OXA1L, PDPK1, PPT1, RARS2, RC3H1, RPL6, RPS29, RPS5, RPUSD4, RSL24D1, SAMD4B, SESN2, SHMT1, SLC25A32, ST6GALNAC4, STAT3, TN…
GO:0043604	amide biosynthetic process	53	6.0571427	3.4191408004604805E-8	1.877108299452804E-5	[B4GALT3, CASC3, CDC123, CDKAL1, CNOT8, DHX33, DTD1, EEF1B2, EIF1, EIF2A, EIF3K, EIF4E2, EIF4G1, ELOVL5, ERAL1, FASTKD2, FPGS, FXR2, GFM1, GSPT2, IREB2, KBTBD8, MALSU1, MARS2, MRPL11, MRPL14, MRPL21, MRPL28, MRPL37, MRPL42, MRPL53, MTHFD1L, OXA1L, PDPK1, PPT1, RARS2, RC3H1, RPL6, RPS29, RPS5, RPUSD4, RSL24D1, SAMD4B, SESN2, SHMT1, ST6GALNAC4, STAT3, TNRC6B, TRUB2, TYMS, USP16, VIM, YBX1]
GO:0140053	mitochondrial gene expression	21	12.5	4.824236739409921E-9	2.6629786801542764E-6	[ELAC2, ERAL1, FASTKD2, GFM1, MALSU1, MRPL11, MRPL14, MRPL21, MRPL28, MRPL37, MRPL42, MRPL53, MTERF3, MTO1, OXA1L, RARS2, RPUSD4, TRIT1, TRMT5, TRUB2, TWNK]
GO:1901566	organonitrogen compound biosynthetic process	79	4.127482	9.184313827537804E-5	0.04748290248837045	[B4GALT1, B4GALT3, B4GALT4, BCAT1, CARD11, CASC3, CBS, CDC123, CDKAL1, CEMIP, CNOT8, COG7, DHODH, DHX33, DTD1, EEF1B2, EIF1, EIF2A, EIF3K, EIF4E2, EIF4G1, ELOVL5, ERAL1, EXT2, FASTKD2, FKRP, FPGS, FXR2, GFM1, GLUL, GPAM, GPT2, GSPT2, IREB2, IRF4, JAK3, KBTBD8, LCMT2, LPIN1, MALSU1, MARS2, MOCS3, MPDU1, MRI1, MRPL11, MRPL14, MRPL21, MRPL28, MRPL37, MRPL42, MRPL53, MTHFD1L, MYO1C, OXA1L, PDPK1, PKM…
GO:0006364	rRNA processing	28	12.38938	1.587143110918156E-11	8.808644265595765E-9	[BUD23, BYSL, C1D, CHD7, DDX10, DDX51, DDX56, EBNA1BP2, ESF1, EXOSC8, FBLL1, GTPBP4, IMP3, MRTO4, NIFK, NOB1, NOL10, NOP53, NSA2, RIOK1, RIOK3, RPF2, RPP30, RRP9, RSL1D1, TENT4B, WDR74, ZNHIT6]
GO:0034470	ncRNA processing	50	12.315271	1.4371250365812515E-19	8.162870207781509E-17	[ADAT1, ADAT3, BUD23, BYSL, C1D, CDKAL1, CHD7, CTU2, DDX10, DDX51, DDX56, DUS2, DUS3L, EBNA1BP2, ELAC2, ESF1, EXOSC8, FAM98B, FBLL1, GRSF1, GTPBP4, IMP3, LCMT2, METTL2A, METTL2B, MOCS3, MRTO4, MTO1, NIFK, NOB1, NOL10, NOP53, NSA2, NSUN6, RIOK1, RIOK3, RPF2, RPP25L, RPP30, RPUSD4, RRP9, RSL1D1, STAT3, TENT4B, THUMPD3, TRIT1, TRMT5, TRUB1, WDR74, ZNHIT6]
GO:0034660	ncRNA metabolic process	55	11.022044	3.499987789731061E-19	1.9844930767775115E-16	[ADAT1, ADAT3, BUD23, BYSL, C1D, CDKAL1, CHD7, CTU2, DDX10, DDX51, DDX56, DTD1, DUS2, DUS3L, EBNA1BP2, ELAC2, ESF1, EXOSC8, FAM98B, FBLL1, GRSF1, GTPBP4, IMP3, LCMT2, MARS2, METTL2A, METTL2B, MOCS3, MRTO4, MTO1, NIFK, NOB1, NOL10, NOP53, NSA2, NSUN6, PELO, RARS2, RC3H1, RIOK1, RIOK3, RPF2, RPP25L, RPP30, RPUSD4, RRP9, RSL1D1, STAT3, TENT4B, THUMPD3, TRIT1, TRMT5, TRUB1, WDR74, ZNHIT6]
GO:0000956	nuclear-transcribed mRNA catabolic process	21	9.589041	4.885138584877777E-7	2.628204558664244E-4	[CASC3, CNOT8, EIF4G1, EXOSC8, GSPT2, MRTO4, MTPAP, PDE12, PELO, PPP2R2A, RC3H1, RDH14, RPL6, RPS29, RPS5, RSL24D1, SAMD4B, SMG9, TENT4B, TNKS1BP1, TNRC6B]
GO:0006397	mRNA processing	38	7.0110703	7.137558783634045E-8	3.8756944195132866E-5	[AAR2, AHCYL1, AQR, ARL6IP4, CACTIN, CASC3, CCNB1, CLNS1A, CWC25, DDX20, FBXO11, FXR2, GEMIN6, GEMIN7, GPKOW, GRSF1, GTF2H1, ISY1, MBNL1, MTPAP, PDE12, PPP4R2, PRMT9, RBM19, RBM28, RDH14, SAP18, SF1, SNRPF, SRPK1, SRSF8, TENT4B, TGS1, TRUB2, TTF2, YBX1, YJU2, ZPR1]
GO:0008380	RNA splicing	33	7.066381	4.4481590591461083E-7	2.3975577328797524E-4	[AAR2, AQR, ARL6IP4, CACTIN, CASC3, CCDC130, CLK2, CLNS1A, CWC25, DDX20, FAM98B, FXR2, GEMIN6, GEMIN7, GPKOW, GRSF1, ISY1, IVNS1ABP, MBNL1, PPP4R2, RBM19, RBM28, RP9, SAP18, SF1, SNRPF, SRPK1, SRSF8, TGS1, TTF2, YBX1, YJU2, ZPR1]
GO:0009057	macromolecule catabolic process	74	4.949833	2.393847331929599E-7	1.2926775592419834E-4	[AMFR, C1D, CASC3, CCDC115, CCNB1, CDC34, CEMIP, CHMP6, CNOT8, CSNK1D, CSNK1E, CTSD, CTSZ, DDA1, DMAC2, EIF4G1, ENDOG, EXOSC8, FASTKD1, FBXL19, FBXO11, FUCA1, FXR2, GRSF1, GSPT2, HERPUD1, IDUA, MAD2L1, MRTO4, MTPAP, NOP53, PBK, PDCL3, PDE12, PELI1, PELO, PLK1, PML, PPP2R2A, PPT1, PSMA4, RC3H1, RDH14, RNASEH1, RNF114, RNF5, RPL6, RPS29, RPS5, RSL24D1, SAMD4B, SDC1, SELENOS, SERBP1, SGSH, SMG9, SQS…
GO:0016071	mRNA metabolic process	61	6.884876	1.1907122726279658E-11	6.644174481264049E-9	[AAR2, AHCYL1, AQR, ARL6IP4, CACTIN, CASC3, CCNB1, CLNS1A, CNOT8, CWC25, DDX20, EIF4G1, EXOSC8, FASTKD1, FBXO11, FXR2, GEMIN6, GEMIN7, GPKOW, GRSF1, GSPT2, GTF2H1, ISY1, MBNL1, MRTO4, MTPAP, PDE12, PELO, PPP2R2A, PPP4R2, PRMT9, PSMA4, RBM19, RBM28, RC3H1, RDH14, RNASEH1, RPL6, RPS29, RPS5, RSL24D1, SAMD4B, SAP18, SERBP1, SF1, SMG9, SNRPF, SRPK1, SRSF8, STAT3, TENT4B, TGS1, TNKS1BP1, TNRC6B, TRUB1…
GO:0044248	cellular catabolic process	98	4.01804	3.5322924274792266E-5	0.01850921231999115	[ACAD8, AMFR, ANXA7, ATP6V0C, ATP6V0D1, BCAT1, C1D, CASC3, CBS, CCDC115, CCNB1, CDC34, CEMIP, CHMP6, CNOT8, COMT, CRYZ, CSNK1D, CSNK1E, CTSZ, DDA1, DMAC2, ECE1, EIF4G1, ENDOG, ETFA, EXOSC8, FASTKD1, FBXL19, FBXO11, FUCA1, FUNDC1, FXR2, GLUL, GPT2, GRAMD1A, GRSF1, GSPT2, HERPUD1, IDUA, ITPA, KIAA1324, LPIN1, MAD2L1, MMAA, MRTO4, MTERF3, MTPAP, NOP53, NPRL3, PBK, PDCL3, PDE12, PDXDC1, PELI1, PELO, …
GO:0044265	cellular macromolecule catabolic process	67	5.394525	4.421471381362071E-8	2.4097019028423287E-5	[AMFR, C1D, CASC3, CCDC115, CCNB1, CDC34, CNOT8, CSNK1D, CSNK1E, CTSZ, DDA1, DMAC2, EIF4G1, ENDOG, EXOSC8, FASTKD1, FBXL19, FBXO11, FXR2, GRSF1, GSPT2, HERPUD1, MAD2L1, MRTO4, MTPAP, NOP53, PBK, PDCL3, PDE12, PELI1, PELO, PLK1, PML, PPP2R2A, PPT1, PSMA4, RC3H1, RDH14, RNASEH1, RNF114, RNF5, RPL6, RPS29, RPS5, RSL24D1, SAMD4B, SELENOS, SERBP1, SGSH, SMG9, SQSTM1, TAF9, TENT4B, TMEM199, TNKS1BP1, T…
GO:1901575	organic substance catabolic process	98	4.1543026	7.747861586416855E-6	0.004098618779214516	[ACAD8, ACTN3, AMFR, BCAT1, BPNT2, C1D, CASC3, CBS, CCDC115, CCNB1, CDC34, CEMIP, CHMP6, CNOT8, COMT, CSNK1D, CSNK1E, CTSD, CTSZ, DDA1, DMAC2, ECE1, EIF4G1, ENDOG, ETFA, EXOSC8, FASTKD1, FBXL19, FBXO11, FLNB, FUCA1, FXR2, GLUL, GPT2, GRSF1, GSPT2, HERPUD1, IDUA, ITPA, LDAH, LPIN1, MAD2L1, MAN2B1, MMAA, MRTO4, MTPAP, NOP53, NUP35, PBK, PDCL3, PDE12, PDXDC1, PELI1, PELO, PEX5, PKM, PLK1, PML, POM12…
GO:0000027	ribosomal large subunit assembly	9	29.032259	7.945538199814859E-8	4.306481704299653E-5	[BRIX1, DHX30, FASTKD2, MRPL11, MRTO4, NOP53, RPF2, RPL6, RSL24D1]
GO:0006399	tRNA metabolic process	26	13.471502	1.2689319863395487E-11	7.055261844047891E-9	[ADAT1, ADAT3, CDKAL1, CTU2, DTD1, DUS2, DUS3L, ELAC2, EXOSC8, FAM98B, GRSF1, LCMT2, MARS2, METTL2A, METTL2B, MOCS3, MTO1, NSUN6, RARS2, RPP25L, RPP30, RPUSD4, THUMPD3, TRIT1, TRMT5, TRUB1]
GO:0006400	tRNA modification	15	16.483517	1.8184930861566376E-8	1.0001711973861507E-5	[ADAT3, CDKAL1, CTU2, DUS2, DUS3L, LCMT2, METTL2A, METTL2B, MOCS3, MTO1, NSUN6, THUMPD3, TRIT1, TRMT5, TRUB1]
GO:0008033	tRNA processing	22	16.17647	1.2546165051732411E-11	6.988213933814953E-9	[ADAT1, ADAT3, CDKAL1, CTU2, DUS2, DUS3L, ELAC2, FAM98B, GRSF1, LCMT2, METTL2A, METTL2B, MOCS3, MTO1, NSUN6, RPP25L, RPP30, RPUSD4, THUMPD3, TRIT1, TRMT5, TRUB1]
GO:0016072	rRNA metabolic process	29	12.236287	9.329593917038945E-12	5.21524299962477E-9	[BUD23, BYSL, C1D, CHD7, DDX10, DDX51, DDX56, EBNA1BP2, ESF1, EXOSC8, FBLL1, GTPBP4, IMP3, MRTO4, NIFK, NOB1, NOL10, NOP53, NSA2, PELO, RIOK1, RIOK3, RPF2, RPP30, RRP9, RSL1D1, TENT4B, WDR74, ZNHIT6]
GO:0022613	ribonucleoprotein complex biogenesis	63	13.785558	3.186403042587648E-27	1.8258089434027223E-24	[AAR2, BRIX1, BUD23, BYSL, C1D, CHD7, CLNS1A, DDX10, DDX20, DDX51, DDX56, DHX30, EBNA1BP2, EIF2A, EIF3K, ERAL1, ESF1, EXOSC8, FASTKD2, FBLL1, GEMIN6, GEMIN7, GLUL, GNL2, GNL3L, GTF3A, GTPBP10, GTPBP4, IMP3, ISY1, LSG1, MALSU1, MRPL11, MRTO4, MTERF3, NIFK, NOB1, NOL10, NOM1, NOP53, NSA2, PAK1IP1, RIOK1, RIOK3, RPF2, RPL6, RPP30, RPS5, RRN3, RRP9, RSL1D1, RSL24D1, SDAD1, SF1, SNRPF, SRPK1, TAF9, TE…
GO:0022618	ribonucleoprotein complex assembly	24	11.764706	1.3281997475380375E-9	7.358226601360727E-7	[AAR2, BRIX1, CLNS1A, DDX20, DHX30, EIF3K, ERAL1, FASTKD2, GEMIN6, GEMIN7, ISY1, MRPL11, MRTO4, NOP53, RPF2, RPL6, RPS5, RSL24D1, SF1, SNRPF, SRPK1, TAF9, TGS1, ZNHIT6]
GO:0042254	ribosome biogenesis	51	16.037735	3.143919457065507E-25	1.7951780099844045E-22	[BRIX1, BUD23, BYSL, C1D, CHD7, DDX10, DDX51, DDX56, DHX30, EBNA1BP2, EIF2A, ERAL1, ESF1, EXOSC8, FASTKD2, FBLL1, GLUL, GNL2, GNL3L, GTF3A, GTPBP10, GTPBP4, IMP3, LSG1, MALSU1, MRPL11, MRTO4, MTERF3, NIFK, NOB1, NOL10, NOM1, NOP53, NSA2, PAK1IP1, RIOK1, RIOK3, RPF2, RPL6, RPP30, RPS5, RRN3, RRP9, RSL1D1, RSL24D1, SDAD1, TENT4B, URB2, WDR74, ZNF593, ZNHIT6]
GO:0042255	ribosome assembly	13	18.309858	4.448279417312926E-8	2.419864003018232E-5	[BRIX1, DHX30, EIF2A, ERAL1, FASTKD2, MRPL11, MRTO4, MTERF3, NOP53, RPF2, RPL6, RPS5, RSL24D1]
GO:0042273	ribosomal large subunit biogenesis	20	26.31579	6.8246021533558325E-15	3.8217772058792665E-12	[BRIX1, DHX30, EBNA1BP2, FASTKD2, GTF3A, GTPBP4, MALSU1, MRPL11, MRTO4, NIFK, NOP53, NSA2, PAK1IP1, RPF2, RPL6, RSL1D1, RSL24D1, SDAD1, WDR74, ZNHIT6]
GO:0043933	protein-containing complex subunit organization	89	4.3309	4.175208717250494E-6	0.0022170358288600123	[AAR2, ACTR6, B2M, BRIX1, CABIN1, CCDC115, CCNB1, CD40, CDC123, CHMP1A, CHMP6, CLNS1A, CRTC1, CRYZ, CSNK1D, CTSZ, DDX20, DHX30, DHX33, DMAC1, DMAC2, EIF3K, EIF4G1, ERAL1, FASTKD2, FN1, G3BP2, GEMIN6, GEMIN7, GNL3L, GPX4, GSPT2, GTF2H1, HIGD1A, ICAM1, ISY1, KIF18B, KMT2D, LIMA1, MAX, MIS18A, MRPL11, MRPL14, MRPL21, MRPL28, MRPL37, MRPL42, MRPL53, MRTO4, MYO1C, NAPG, NCKAP5L, NIFK, NOP53, NUBPL, NU…
GO:0044085	cellular component biogenesis	139	4.1418357	3.9978803396002816E-8	2.190838426100954E-5	[AAR2, ACTN3, ATP6V0D1, AUTS2, B2M, BIRC5, BRIX1, BUD23, BYSL, C1D, CABIN1, CCDC115, CCNB1, CD40, CDC123, CDC34, CHD7, CHMP1A, CHMP6, CLNS1A, CRTC1, CRYZ, CSNK1D, CSNK1E, CTSZ, DDX10, DDX20, DDX51, DDX56, DHX30, DHX33, DMAC1, DMAC2, DNAJB6, EBNA1BP2, EIF2A, EIF3K, EIF4G1, ERAL1, ESF1, EXOSC8, FAM98A, FARP1, FASTKD2, FBLL1, FN1, FXR2, G3BP2, GEMIN6, GEMIN7, GLUL, GNL2, GNL3L, GPX4, GTF2H1, GTF3A, …
GO:0065003	protein-containing complex assembly	75	4.2565265	4.989290406711043E-5	0.025994203018964535	[AAR2, B2M, BRIX1, CABIN1, CCDC115, CCNB1, CD40, CDC123, CHMP6, CLNS1A, CRTC1, CRYZ, CSNK1D, CTSZ, DDX20, DHX30, DHX33, DMAC1, DMAC2, EIF3K, EIF4G1, ERAL1, FASTKD2, FN1, G3BP2, GEMIN6, GEMIN7, GNL3L, GPX4, GTF2H1, HIGD1A, ICAM1, ISY1, KMT2D, MAX, MIS18A, MRPL11, MRTO4, MYO1C, NAPG, NIFK, NOP53, NUBPL, OXA1L, PEX5, PML, PSMG2, RAD51, RAF1, RIOK3, RPF2, RPL6, RPS5, RRN3, RSL24D1, SDHAF1, SF1, SHMT1…
GO:0071826	ribonucleoprotein complex subunit organization	24	11.374408	2.6336269901385546E-9	1.4563957255466206E-6	[AAR2, BRIX1, CLNS1A, DDX20, DHX30, EIF3K, ERAL1, FASTKD2, GEMIN6, GEMIN7, ISY1, MRPL11, MRTO4, NOP53, RPF2, RPL6, RPS5, RSL24D1, SF1, SNRPF, SRPK1, TAF9, TGS1, ZNHIT6]
